# Supplementary material for: A short course of antibiotics selects for persistent resistance in the human gut
Source: Research Square preprint supplement (doi:10.21203/rs.3.rs-3399159/v1), 2023-10-13
Supplement: Supplementary file 2 [file 196477177c3857ab8a9b88e5.xlsx]

## Sheet: bins_final
gid	aid	bin	xcoverage	length	n_strains	complete	contam	is.detected	strain.class	K02469_83_value	K02469_83_mut	vars	var.genes	sweep.vars	sweep.genes	phylum	class	order	family	genus	species
AAK_1	AAK	AAK_b3734_1	2342.3	2689314	7	88.93	0.64	TRUE	ok	l		196	53	0	0	Bacteroidota	Bacteroidia	Bacteroidales	Rikenellaceae	Alistipes	Alistipes onderdonkii
AAK_2	AAK	AAK_b9016_1	1460.3	2005250	7	94.9	1.92	TRUE	ok	i		22	16	0	0	Bacteroidota	Bacteroidia	Bacteroidales	Rikenellaceae	Alistipes	Alistipes putredinis
AAK_3	AAK	AAK_b13598_1	1253.2	3664502	0	68.61	0	TRUE	too_many			0	0	0	0	Bacteroidota	Bacteroidia	Bacteroidales	Bacteroidaceae	Bacteroides	Bacteroides uniformis
AAK_4	AAK	AAK_b13246_1	1134.9	1947878	7	93.54	0.68	TRUE	ok	a		11	13	0	0	Firmicutes_A	Clostridia	Oscillospirales	Ruminococcaceae	Faecalibacterium	Faecalibacterium prausnitzii_G
AAK_5	AAK	AAK_b13046_1	1073.6	2286128	5	92.82	0.24	TRUE	ok			13	8	0	0	Firmicutes_A	Clostridia	Lachnospirales	Lachnospiraceae	Agathobacter	Agathobacter rectalis
AAK_6	AAK	AAK_b16199_1	1070.2	4534242	5	88.8	0.2	TRUE	ok	s	s->f	57	19	0	0	Bacteroidota	Bacteroidia	Bacteroidales	Bacteroidaceae	Phocaeicola	Phocaeicola dorei
AAK_7	AAK	AAK_b26275_1	810	2663148	3	91.71	0.91	TRUE	ok	s		60	17	0	0	Firmicutes_A	Clostridia	Lachnospirales	Lachnospiraceae	Eisenbergiella	Eisenbergiella sp900066775
AAK_8	AAK	AAK_b12926_1	791.3	3001365	5	96.02	1.45	TRUE	ok	s		20	7	0	0	Firmicutes_A	Clostridia	Lachnospirales	Lachnospiraceae	Acetatifactor	Acetatifactor sp900066565
AAK_9	AAK	AAK_b4644_1	761.9	3472764	3	91.39	0.56	TRUE	ok	s		6	5	0	0	Bacteroidota	Bacteroidia	Bacteroidales	Bacteroidaceae	Phocaeicola	Phocaeicola massiliensis
AAK_10	AAK	AAK_b18785_1	568.1	2013600	3	95.97	0.34	TRUE	ok	a		2	3	0	0	Firmicutes_A	Clostridia	Oscillospirales	Acutalibacteraceae	Ruminococcus_E	Ruminococcus_E sp003526955
AAK_11	AAK	AAK_b9158	513.9	3058878	3	96.98	0	TRUE	ok	s		8	5	0	0	Bacteroidota	Bacteroidia	Bacteroidales	Barnesiellaceae	Barnesiella	Barnesiella intestinihominis
AAK_12	AAK	AAK_b30169	460.8	2453164	4	97.31	1.02	TRUE	ok	a		3	3	0	0	Firmicutes_A	Clostridia	Oscillospirales	Ruminococcaceae	Gemmiger	Gemmiger qucibialis
AAK_13	AAK	AAK_b5265	402.8	2840584	2	91.16	0.68	TRUE	ok			2	2	0	0	Verrucomicrobiota	Verrucomicrobiae	Verrucomicrobiales	Akkermansiaceae	Akkermansia	Akkermansia sp001580195
AAK_14	AAK	AAK_b30937_1	352.7	2836547	2	92.17	2.35	TRUE	ok	q		50	11	0	0	Firmicutes_A	Clostridia	Oscillospirales	Oscillospiraceae	Intestinimonas	Intestinimonas butyriciproducens
AAK_15	AAK	AAK_b26331_1	321.4	2563878	0	93.47	2.06	TRUE	none	s		0	0	0	0	Firmicutes_A	Clostridia	Lachnospirales	Lachnospiraceae	Fusicatenibacter	Fusicatenibacter saccharivorans
AAK_16	AAK	AAK_b19117	314.2	1654762	2	89.57	0.34	TRUE	ok	a		4	4	0	0	Firmicutes_A	Clostridia	Oscillospirales	Oscillospiraceae	F23-B02	F23-B02 sp000431075
AAK_17	AAK	AAK_b6388_1	297.5	2691115	2	98.58	4.36	TRUE	ok	s		6	2	0	0	Firmicutes_A	Clostridia	Lachnospirales	Lachnospiraceae	Anaerostipes	Anaerostipes hadrus
AAK_18	AAK	AAK_b27598_1	288.9	2090048	0	82.25	7.33	TRUE	too_many	a		0	0	0	0	Firmicutes_A	Clostridia	Oscillospirales	Oscillospiraceae	Dysosmobacter	Dysosmobacter welbionis
AAK_19	AAK	AAK_b7128	254.8	3396767	3	98.42	0.19	TRUE	ok	s		12	10	0	0	Bacteroidota	Bacteroidia	Bacteroidales	Bacteroidaceae	Paraprevotella	Paraprevotella clara
AAK_20	AAK	AAK_b1370_1	247.5	2596625	2	91.9	5.2	TRUE	ok			27	10	25	10	Firmicutes_A	Clostridia	Oscillospirales	Oscillospiraceae	Lawsonibacter	Lawsonibacter sp910588635
AAK_21	AAK	AAK_b8079	217.9	2653688	2	96.98	0	TRUE	ok	a		19	24	1	2	Firmicutes_A	Clostridia	Oscillospirales	Ruminococcaceae	CAG-115	CAG-115 sp003531585
AAK_22	AAK	AAK_b957_1	208.8	2832476	2	90.87	1.9	TRUE	ok	s		1	1	0	0	Firmicutes_A	Clostridia	Lachnospirales	Lachnospiraceae	Oliverpabstia	Oliverpabstia intestinalis
AAK_23	AAK	AAK_b20006_1	208.5	2800403	4	92.81	1.27	TRUE	ok			19	6	0	0	Firmicutes_A	Clostridia	Lachnospirales	Lachnospiraceae	Blautia_A	Blautia_A wexlerae
AAK_24	AAK	AAK_b12919	204.1	2934565	2	97.32	1.34	TRUE	ok	m		3	2	0	0	Firmicutes_A	Clostridia	Oscillospirales	Acutalibacteraceae	Fimivicinus	Fimivicinus sp900544375
AAK_25	AAK	AAK_b18214_1	203.4	2802084	2	71.71	1.75	TRUE	ok	s		0	0	0	0	Firmicutes_A	Clostridia	Lachnospirales	Lachnospiraceae	Blautia_A	Blautia_A faecis
AAK_26	AAK	AAK_b3147_1	202.6	4427012	2	94.94	0.23	FALSE	ok	s		8	3	4	2	Bacteroidota	Bacteroidia	Bacteroidales	Tannerellaceae	Parabacteroides	Parabacteroides distasonis
AAK_27	AAK	AAK_b2920_1	184.5	3345398	2	93.07	2.29	TRUE	ok	s		6	1	0	0	Firmicutes_A	Clostridia	Lachnospirales	Lachnospiraceae	Roseburia	Roseburia inulinivorans
AAK_28	AAK	AAK_b32146	168.8	2616683	2	90.18	1.87	TRUE	ok			9	1	0	0	Firmicutes_A	Clostridia	Oscillospirales	Oscillospiraceae	Dysosmobacter	Dysosmobacter sp009774015
AAK_29	AAK	AAK_b35307_1	167.5	2957969	0	93.43	1.21	TRUE	none	s		0	0	0	0	Firmicutes_A	Clostridia	Lachnospirales	Lachnospiraceae	Roseburia	Roseburia hominis
AAK_30	AAK	AAK_b17405	166	2664918	3	96.21	2.27	FALSE	ok	s		5	3	0	0	Firmicutes_A	Clostridia	Lachnospirales	Lachnospiraceae	CAG-95	CAG-95 sp900066375
AAK_31	AAK	AAK_b1439	152.2	1479652	2	93.95	0	FALSE	ok	s		70	54	0	0	Firmicutes_A	Clostridia	Christensenellales	CAG-314	CAG-314	CAG-314 sp000437915
AAK_32	AAK	AAK_b5293_1	151.1	2685167	2	97.96	0.02	FALSE	ok	s		1	1	0	0	Firmicutes_A	Clostridia	Lachnospirales	Lachnospiraceae	Eubacterium_F	Eubacterium_F sp003491505
AAK_33	AAK	AAK_b18632	150.2	3422532	2	82.74	3.71	TRUE	ok			17	5	17	5	Firmicutes_A	Clostridia	Oscillospirales	Oscillospiraceae	Flavonifractor	Flavonifractor plautii
AAK_34	AAK	AAK_b35763	144.5	3044139	0	89.69	1.58	TRUE	none			0	0	0	0	Firmicutes_A	Clostridia	Lachnospirales	Lachnospiraceae	Enterocloster	Enterocloster sp000431375
AAK_35	AAK	AAK_b19280	140.7	2054523	0	98.12	0.62	FALSE	none	l		0	0	0	0	Proteobacteria	Gammaproteobacteria	Burkholderiales	Burkholderiaceae	Duodenibacillus	Duodenibacillus sp.
AAK_36	AAK	AAK_b5244	125.5	1961298	3	93.57	1.51	FALSE	ok	g		5	2	1	1	Firmicutes_A	Clostridia	Oscillospirales	Oscillospiraceae	Limivicinus	Limivicinus sp002320035
AAK_37	AAK	AAK_b8149_1	118.1	2058593	0	93.99	2.1	FALSE	none	i		0	0	0	0	Firmicutes_C	Negativicutes	Acidaminococcales	Acidaminococcaceae	Phascolarctobacterium	Phascolarctobacterium faecium
AAK_38	AAK	AAK_b4257_1	115.9	2543276	0	95.75	2.81	TRUE	none	q		0	0	0	0	Firmicutes_A	Clostridia	Oscillospirales	Oscillospiraceae	Faecousia	Faecousia sp900544975
AAK_39	AAK	AAK_b23618	102.5	2922571	0	94.91	1.4	FALSE	none	a		0	0	0	0	Firmicutes_A	Clostridia	Oscillospirales	Ruminococcaceae	Ruthenibacterium	Ruthenibacterium lactatiformans
AAK_40	AAK	AAK_b28572_1	100.2	6162449	0	89.85	2.95	FALSE	none	s		0	0	0	0	Firmicutes_A	Clostridia	Lachnospirales	Lachnospiraceae	Eisenbergiella	Eisenbergiella porci
AAK_41	AAK	AAK_b24071_1	94.4	3171378	0	67.57	1.72	FALSE	none	l		0	0	0	0	Bacteroidota	Bacteroidia	Bacteroidales	Tannerellaceae	Parabacteroides	Parabacteroides merdae
AAK_42	AAK	AAK_b32837_1	90.2	2349412	2	88.96	1.95	FALSE	ok	s		2	1	0	0	Firmicutes_A	Clostridia	Lachnospirales	Lachnospiraceae	Dorea_B	Dorea_B phocaeensis
AAK_43	AAK	AAK_b3198_1	87.6	2411267	2	88.29	1.74	FALSE	ok			1	2	0	0	Firmicutes_A	Clostridia	Lachnospirales	Lachnospiraceae	Clostridium_Q	Clostridium_Q fessum
AAK_44	AAK	AAK_b26670_1	84.4	2332355	0	92.96	0	TRUE	none	s		0	0	0	0	Firmicutes_A	Clostridia	Lachnospirales	Lachnospiraceae	Mediterraneibacter	Mediterraneibacter torques
AAK_45	AAK	AAK_b9956_1	83.7	2793032	2	87	1.9	FALSE	ok	s		1	1	0	0	Firmicutes_A	Clostridia	Lachnospirales	Lachnospiraceae	Blautia_A	Blautia_A sp003474435
AAK_46	AAK	AAK_b44477_1	79.5	2113489	0	55.26	0	FALSE	none			0	0	0	0	Firmicutes_A	Clostridia	Lachnospirales	Lachnospiraceae	Copromonas	Copromonas sp900066535
AAK_47	AAK	AAK_b4708_1	72.1	3767315	0	98.81	2.21	FALSE	none	i		0	0	0	0	Firmicutes_A	Clostridia	Christensenellales	CAG-74	Onthenecus	Onthenecus sp900199405
AAK_48	AAK	AAK_b4774_1	68	2447717	0	85.6	2.15	FALSE	none	a		0	0	0	0	Firmicutes_A	Clostridia	Oscillospirales	Oscillospiraceae	Evtepia	Evtepia gabavorous
AAK_49	AAK	AAK_b16589_2	65.6	2535244	0	93.42	0.79	FALSE	none	s		0	0	0	0	Firmicutes_A	Clostridia	Lachnospirales	Lachnospiraceae	UMGS1370	UMGS1370 sp900542035
AAK_50	AAK	AAK_b11834_1	62.8	2106379	0	91.72	1.97	FALSE	none	s		0	0	0	0	Firmicutes_A	Clostridia	Lachnospirales	Lachnospiraceae	UBA11774	UBA11774 sp003507655
AAK_51	AAK	AAK_b2642_1	62.3	2242145	0	90.18	2.72	FALSE	none	a		0	0	0	0	Firmicutes_A	Clostridia	Oscillospirales	Ruminococcaceae	Ruthenibacterium	Ruthenibacterium merdipullorum
AAK_52	AAK	AAK_b32968_1	59.7	2133404	2	99.05	0.72	FALSE	ok	s		1	1	0	0	Firmicutes_A	Clostridia	Christensenellales	CAG-138	Pelethousia	Pelethousia gallinarum
AAK_53	AAK	AAK_b44387_1	56.9	3126434	0	92.58	8.12	FALSE	none	s		0	0	0	0	Firmicutes_A	Clostridia	Lachnospirales	Lachnospiraceae	Faecalimonas	Faecalimonas phoceensis
AAK_54	AAK	AAK_b831	56.8	2489328	0	88.2	0.15	FALSE	none	s		0	0	0	0	Firmicutes_A	Clostridia	Lachnospirales	Lachnospiraceae	Clostridium_AP	Clostridium_AP scindens
AAK_55	AAK	AAK_b18822_1	55.7	2223695	0	74.31	5.17	FALSE	none			0	0	0	0	Firmicutes_A	Clostridia	Lachnospirales	Lachnospiraceae	Ruminococcus_B	Ruminococcus_B gnavus
AAK_56	AAK	AAK_b45170_1	54.1	5024751	0	76.43	3.51	FALSE	none			0	0	0	0	Firmicutes_A	Clostridia	Lachnospirales	Lachnospiraceae	Enterocloster	Enterocloster lavalensis
AAK_57	AAK	AAK_b990_1	51.8	1995375	0	63.79	4.31	FALSE	none			0	0	0	0	Firmicutes_A	Clostridia	Oscillospirales	Oscillospiraceae	Lawsonibacter	Lawsonibacter sp900066645
AAK_58	AAK	AAK_b37675	50.6	2172914	0	55.69	0	FALSE	none			0	0	0	0	Firmicutes_A	Clostridia	Oscillospirales	Oscillospiraceae	Lawsonibacter	Lawsonibacter asaccharolyticus
AAK_59	AAK	AAK_b28472_1	45.7	2345232	0	92.87	1.12	FALSE	none			0	0	0	0	Firmicutes_A	Clostridia	Lachnospirales	Lachnospiraceae	Frisingicoccus	Frisingicoccus sp900757195
AAK_60	AAK	AAK_b14204	44.2	1716417	2	78.17	2.68	FALSE	ok	a		4	3	0	0	Firmicutes_A	Clostridia	Oscillospirales	Butyricicoccaceae	Agathobaculum	Agathobaculum butyriciproducens
AAK_61	AAK	AAK_b6634_1	40.7	2367298	2	66.38	1.61	FALSE	ok			29	17	1	1	Actinobacteriota	Coriobacteriia	Coriobacteriales	Eggerthellaceae	Eggerthella	Eggerthella lenta
AAK_62	AAK	AAK_b47043_1	39.7	4916453	0	93.15	0.81	FALSE	none	s		0	0	0	0	Bacteroidota	Bacteroidia	Bacteroidales	Marinifilaceae	Butyricimonas	Butyricimonas paravirosa
AAK_63	AAK	AAK_b8181_1	39.6	2084600	0	58.53	4.39	FALSE	none	s		0	0	0	0	Firmicutes_A	Clostridia	Lachnospirales	Lachnospiraceae	Anaerobutyricum	Anaerobutyricum soehngenii
AAK_64	AAK	AAK_b339_1	39.3	1840250	0	50	0	FALSE	none	s		0	0	0	0	Firmicutes_A	Clostridia	Lachnospirales	Lachnospiraceae	Ventrimonas	Ventrimonas sp900770535
AAK_65	AAK	AAK_b10047_1	39	2250321	0	84.2	0.67	FALSE	none	a		0	0	0	0	Firmicutes_A	Clostridia	UBA1381	UBA1381	CAG-41	CAG-41 sp900066215
AAK_66	AAK	AAK_b26267	38.6	1748861	0	92.54	0.22	FALSE	none	a		0	0	0	0	Firmicutes_A	Clostridia	Oscillospirales	Ruminococcaceae	Ruminococcus_D	Ruminococcus_D sp900539835
AAK_67	AAK	AAK_b8632_1	37.1	1830223	0	77.24	0.11	FALSE	none	a		0	0	0	0	Firmicutes_A	Clostridia	Monoglobales	Monoglobaceae	Monoglobus	Monoglobus pectinilyticus
AAK_68	AAK	AAK_b33206	36.9	2141806	0	77.53	2.08	FALSE	none	l		0	0	0	0	Bacteroidota	Bacteroidia	Bacteroidales	Rikenellaceae	Alistipes_A	Alistipes_A indistinctus
AAK_69	AAK	AAK_b21241_1	35.2	1342944	2	57.36	1.72	FALSE	ok			1	1	0	0	Firmicutes_A	Clostridia	Oscillospirales	Oscillospiraceae	CAG-83	CAG-83 sp000431575
AAK_70	AAK	AAK_b460	34.3	1742651	0	58.19	0	FALSE	none	s		0	0	0	0	Firmicutes_A	Clostridia	Lachnospirales	Lachnospiraceae	RUG115	RUG115 sp900066395
AAK_71	AAK	AAK_b25022_1	32.5	2427375	2	75.67	0.47	FALSE	ok	t		1	1	0	0	Firmicutes	Bacilli	Erysipelotrichales	Coprobacillaceae	Erysipelatoclostridium	Erysipelatoclostridium ramosum
AAK_72	AAK	AAK_b14760_1	31.6	2577217	0	89.32	1.48	FALSE	none	s		0	0	0	0	Firmicutes_A	Clostridia	Christensenellales	CAG-74	Limiplasma	Limiplasma pullistercoris
AAK_73	AAK	AAK_b41437	30.7	1271922	0	61.34	2.1	FALSE	none	l		0	0	0	0	Firmicutes_A	Clostridia	Christensenellales	Borkfalkiaceae	Borkfalkia	Borkfalkia ceftriaxoniphila
AAK_74	AAK	AAK_b31397	30.1	1426200	0	65.81	1.42	FALSE	none	a		0	0	0	0	Firmicutes_A	Clostridia	Oscillospirales	Ruminococcaceae	Anaerotruncus	Anaerotruncus colihominis
AAK_75	AAK	AAK_b1612_1	29.1	987046	0	50.55	3.69	FALSE	none	a		0	0	0	0	Firmicutes_A	Clostridia	Oscillospirales	Ruminococcaceae	UBA3818	UBA3818 sp900557155
AAK_76	AAK	AAK_b19486_1	28.9	1412711	0	70.78	1.34	FALSE	none	s		0	0	0	0	Firmicutes_A	Clostridia	Lachnospirales	Anaerotignaceae	Anaerotignum	Anaerotignum faecicola
AAK_77	AAK	AAK_b21114_1	28.3	1825955	0	76.34	1.01	FALSE	none	s		0	0	0	0	Firmicutes_A	Clostridia	Lachnospirales	Lachnospiraceae	Eubacterium_G	Eubacterium_G sp910574895
AAK_78	AAK	AAK_b6787_1	28.3	1746588	2	91.99	2.71	FALSE	ok	t		1	1	0	0	Firmicutes_A	Clostridia	Christensenellales	CAG-138	PeH17	PeH17 sp001940845
AAK_79	AAK	AAK_b22517_1	24.6	1809417	0	72.93	0.22	FALSE	none	a		0	0	0	0	Firmicutes_A	Clostridia	Oscillospirales	Ruminococcaceae	UBA1394	UBA1394 sp900066845
AAK_80	AAK	AAK_b38396_1	23.4	1142500	0	59.24	0.24	FALSE	none	g		0	0	0	0	Firmicutes_A	Clostridia	Peptostreptococcales	Anaerovoracaceae	Fimisoma	Fimisoma sp000435715
AAQ_1	AAQ	AAQ_b13217_1	365.3	2301457	4	92.03	2.05	TRUE	ok	s		290	174	0	0	Firmicutes_A	Clostridia	Lachnospirales	Lachnospiraceae	Agathobacter	Agathobacter rectalis
AAQ_2	AAQ	AAQ_b26387_1	309.3	3665037	4	97.45	1.3	TRUE	ok	l		34	32	0	0	Bacteroidota	Bacteroidia	Bacteroidales	Bacteroidaceae	Phocaeicola	Phocaeicola plebeius
AAQ_3	AAQ	AAQ_b19313_1	213.4	2166367	0	92.67	0	FALSE	too_many	s		0	0	0	0	Firmicutes_A	Clostridia	Lachnospirales	Lachnospiraceae	Lachnospira	Lachnospira eligens_A
AAQ_4	AAQ	AAQ_b3841_1	156.5	5354400	2	97.7	2.54	TRUE	ok	f		4	4	0	0	Bacteroidota	Bacteroidia	Bacteroidales	Bacteroidaceae	Phocaeicola	Phocaeicola dorei
AAQ_5	AAQ	AAQ_b16333_1	131	2888541	3	77.11	3.51	FALSE	ok			207	144	86	69	Firmicutes_A	Clostridia	Lachnospirales	Lachnospiraceae	Blautia_A	Blautia_A sp000436615
AAQ_6	AAQ	AAQ_b15866_1	127	2700863	2	87.95	4.45	FALSE	ok	s		134	104	0	0	Firmicutes_A	Clostridia	Lachnospirales	Lachnospiraceae	Fusicatenibacter	Fusicatenibacter saccharivorans
AAQ_7	AAQ	AAQ_b18529_1	122.6	3745306	2	91.62	2.3	TRUE	ok	l		130	95	0	0	Bacteroidota	Bacteroidia	Bacteroidales	Bacteroidaceae	Bacteroides	Bacteroides uniformis
AAQ_8	AAQ	AAQ_b8366_1	113.7	2590754	3	70.69	1.75	FALSE	ok	s		18	3	0	0	Firmicutes_A	Clostridia	Lachnospirales	Lachnospiraceae	Agathobacter	Agathobacter sp905209075
AAQ_9	AAQ	AAQ_b42585_1	110.2	3176407	3	96.11	0	FALSE	ok	s		17	10	1	2	Firmicutes_A	Clostridia	Lachnospirales	Lachnospiraceae	Butyribacter	Butyribacter intestini
AAQ_10	AAQ	AAQ_b16248	89.9	2187294	0	98.39	4.03	FALSE	none	f		0	0	0	0	Actinobacteriota	Coriobacteriia	Coriobacteriales	Coriobacteriaceae	Collinsella	Collinsella sp900760215
AAQ_11	AAQ	AAQ_b31257_1	89.7	2965260	3	88	0.67	FALSE	ok	l		7	2	0	0	Firmicutes_A	Clostridia	Lachnospirales	Lachnospiraceae	CAG-882	CAG-882 sp003486385
AAQ_12	AAQ	AAQ_b17499_1	86.7	2304369	0	73.9	5.17	FALSE	none	s		0	0	0	0	Firmicutes_A	Clostridia	Lachnospirales	Lachnospiraceae	Agathobacter	Agathobacter faecis
AAQ_13	AAQ	AAQ_b16600	85.5	1980457	2	94.75	2.34	FALSE	ok	s		1	2	1	2	Actinobacteriota	Actinomycetia	Actinomycetales	Bifidobacteriaceae	Bifidobacterium	Bifidobacterium adolescentis
AAQ_14	AAQ	AAQ_b51457	76.9	2059111	2	98.66	1.01	FALSE	ok	a		1	2	0	0	Firmicutes_A	Clostridia	Oscillospirales	Acutalibacteraceae	Ruminococcus_E	Ruminococcus_E bromii_B
AAQ_15	AAQ	AAQ_b16633_1	76.2	2388106	0	90.41	3.29	FALSE	none	a		0	0	0	0	Firmicutes_A	Clostridia	Oscillospirales	Ruminococcaceae	Gemmiger	Gemmiger qucibialis
AAQ_16	AAQ	AAQ_b24787_1	75.5	1986441	0	78.95	0	FALSE	none	a		0	0	0	0	Firmicutes_A	Clostridia	Oscillospirales	Ruminococcaceae	Ruminococcus_C	Ruminococcus_C callidus
AAQ_17	AAQ	AAQ_b4595	74.4	1499651	0	72.78	0	FALSE	none	i		0	0	0	0	Firmicutes_C	Negativicutes	Veillonellales	Dialisteraceae	Dialister	Dialister invisus
AAQ_18	AAQ	AAQ_b250_1	73.6	2899186	2	97.2	1.54	TRUE	ok	s		1	1	0	0	Firmicutes_A	Clostridia	Christensenellales	CAG-74	UBA11524	UBA11524 sp000437595
AAQ_19	AAQ	AAQ_b1781_1	70	2421440	2	53.46	1.75	FALSE	ok			27	18	10	8	Firmicutes_A	Clostridia	Lachnospirales	Lachnospiraceae	Blautia_A	Blautia_A sp900066205
AAQ_20	AAQ	AAQ_b37583_1	68	6646332	0	78.09	3.45	FALSE	none	s		0	0	0	0	Bacteroidota	Bacteroidia	Bacteroidales	Bacteroidaceae	Bacteroides	Bacteroides cellulosilyticus
AAQ_21	AAQ	AAQ_b24220	67.7	2946384	0	93.03	5.32	FALSE	none	s		0	0	0	0	Firmicutes_A	Clostridia	Lachnospirales	Lachnospiraceae	Roseburia	Roseburia hominis
AAQ_22	AAQ	AAQ_b31254_1	66.6	2436497	0	96.48	2.01	FALSE	none	s		0	0	0	0	Firmicutes_A	Clostridia	Lachnospirales	Lachnospiraceae	Coprococcus	Coprococcus sp000154245
AAQ_23	AAQ	AAQ_b37488	65.5	3590609	0	91.26	7.47	FALSE	none	s		0	0	0	0	Firmicutes_A	Clostridia	Lachnospirales	Lachnospiraceae	Roseburia	Roseburia intestinalis
AAQ_24	AAQ	AAQ_b565	59.4	1930750	0	96.4	0	FALSE	none	a		0	0	0	0	Firmicutes_A	Clostridia	Oscillospirales	Acutalibacteraceae	Eubacterium_R	Eubacterium_R sp000433975
AAQ_25	AAQ	AAQ_b41400	53.5	2526391	0	94.57	0	FALSE	none	a		0	0	0	0	Firmicutes_A	Clostridia	Oscillospirales	Ruminococcaceae	CAG-115	CAG-115 sp003531585
AAQ_26	AAQ	AAQ_b32857_1	49.4	2819017	2	81.56	4.11	FALSE	ok			12	8	1	1	Firmicutes_A	Clostridia	Lachnospirales	Lachnospiraceae	Anaerostipes	Anaerostipes hadrus_A
AAQ_27	AAQ	AAQ_b6865_1	47.3	2642948	0	68.85	4.86	FALSE	none			0	0	0	0	Firmicutes_A	Clostridia	Lachnospirales	Lachnospiraceae	Blautia_A	Blautia_A wexlerae
AAQ_28	AAQ	AAQ_b7105_1	46.1	2161391	0	95.39	0.57	FALSE	none	f		0	0	0	0	Actinobacteriota	Actinomycetia	Actinomycetales	Bifidobacteriaceae	Bifidobacterium	Bifidobacterium longum
AAQ_29	AAQ	AAQ_b11875_1	45.6	2442325	0	93.65	2.01	FALSE	none			0	0	0	0	Firmicutes_A	Clostridia	Lachnospirales	Lachnospiraceae	CAG-127	CAG-127 sp900319515
AAQ_30	AAQ	AAQ_b15152_1	45.5	5766062	2	62.07	4.31	FALSE	ok	s		5	4	0	0	Bacteroidota	Bacteroidia	Bacteroidales	Bacteroidaceae	Bacteroides	Bacteroides ovatus
AAQ_31	AAQ	AAQ_b9996	45.3	1901250	2	93.59	0.34	FALSE	ok	a		1	1	0	0	Firmicutes_A	Clostridia	Oscillospirales	Acutalibacteraceae	Fimenecus	Fimenecus sp000432435
AAQ_32	AAQ	AAQ_b17727	43.2	2426371	0	92.67	5.01	FALSE	none	s		0	0	0	0	Firmicutes_A	Clostridia	Lachnospirales	Lachnospiraceae	RUG115	RUG115 sp900066395
AAQ_33	AAQ	AAQ_b13607_1	42.7	3526899	0	94.32	4.82	FALSE	none	s		0	0	0	0	Firmicutes_A	Clostridia	Lachnospirales	Lachnospiraceae	Anaerobutyricum	Anaerobutyricum hallii
AAQ_34	AAQ	AAQ_b18327_1	42.3	2412171	0	93.93	0	FALSE	none	s		0	0	0	0	Firmicutes_A	Clostridia	Lachnospirales	Lachnospiraceae	Butyribacter	Butyribacter sp003529475
AAQ_35	AAQ	AAQ_b10647_1	41.6	2688922	3	76.35	6.03	FALSE	ok	s		1	2	0	0	Firmicutes_A	Clostridia	Lachnospirales	Lachnospiraceae	Agathobacter	Agathobacter sp000434275
AAQ_36	AAQ	AAQ_b18206_1	40	2060271	0	87.56	2.39	FALSE	none			0	0	0	0	Firmicutes_A	Clostridia	Oscillospirales	Butyricicoccaceae	Agathobaculum	Agathobaculum butyriciproducens
AAQ_37	AAQ	AAQ_b48644	34.6	1625069	0	97.58	0.12	FALSE	none	t		0	0	0	0	Actinobacteriota	Coriobacteriia	Coriobacteriales	Eggerthellaceae	CAG-1427	CAG-1427 sp000435675
AAQ_38	AAQ	AAQ_b24407_1	33.4	3905622	0	95.03	5.31	FALSE	none	s		0	0	0	0	Firmicutes_A	Clostridia	Lachnospirales	Lachnospiraceae	KLE1615	KLE1615 sp900066985
AAQ_39	AAQ	AAQ_b24200_1	30.9	2693152	0	67.89	7.89	FALSE	none			0	0	0	0	Firmicutes_A	Clostridia	Lachnospirales	Lachnospiraceae	Eubacterium_I	Eubacterium_I sp900546495
AAQ_40	AAQ	AAQ_b7895_1	30.9	1935423	0	64.79	5.36	FALSE	none	a		0	0	0	0	Firmicutes_A	Clostridia	Oscillospirales	Ruminococcaceae	Gemmiger	Gemmiger sp900539695
AAQ_41	AAQ	AAQ_b12039_1	28.8	2426291	0	77.72	0	FALSE	none	y		0	0	0	0	Firmicutes_A	Clostridia	Lachnospirales	Lachnospiraceae	Lachnospira	Lachnospira sp900316325
AAQ_42	AAQ	AAQ_b1528_1	28.8	2113703	2	92.44	8.98	FALSE	ok	s		2	2	0	0	Firmicutes_A	Clostridia	Lachnospirales	Lachnospiraceae	UBA11774	UBA11774 sp003507655
AAQ_43	AAQ	AAQ_b40665_1	27.8	2509233	0	90.78	0	FALSE	none	s		0	0	0	0	Firmicutes_A	Clostridia	Lachnospirales	Lachnospiraceae	Butyribacter	Butyribacter sp003149875
AAQ_44	AAQ	AAQ_b5362_1	27.5	2710296	0	56.3	0	FALSE	none	l		0	0	0	0	Firmicutes_A	Clostridia	Lachnospirales	Lachnospiraceae	CAG-882	CAG-882 sp900545175
AAQ_45	AAQ	AAQ_b5731_1	26.1	2503936	0	88.11	5.63	FALSE	none	s		0	0	0	0	Firmicutes_A	Clostridia	Lachnospirales	Lachnospiraceae	Bariatricus	Bariatricus comes
AAQ_46	AAQ	AAQ_b22772	25.5	1622086	0	93.55	0	FALSE	none	s		0	0	0	0	Proteobacteria	Alphaproteobacteria	RF32	CAG-239	Scatocola	Scatocola faecipullorum
AAQ_47	AAQ	AAQ_b6785_1	25.3	2414615	0	84.37	1.03	FALSE	none	s		0	0	0	0	Firmicutes_A	Clostridia	Lachnospirales	Lachnospiraceae	Butyribacter	Butyribacter sp003524945
AAQ_48	AAQ	AAQ_b18671_1	24.3	1756378	0	51.05	1.75	FALSE	none			0	0	0	0	Firmicutes_A	Clostridia	Lachnospirales	Lachnospiraceae	Oliverpabstia	Oliverpabstia faecicola
AAQ_49	AAQ	AAQ_b7766_1	24.2	3331807	0	89.89	4.22	FALSE	none			0	0	0	0	Firmicutes_A	Clostridia	Lachnospirales	Lachnospiraceae	Enterocloster	Enterocloster sp000431375
AAQ_50	AAQ	AAQ_b10914_1	21.7	1813990	0	90.07	0.87	FALSE	none	a		0	0	0	0	Firmicutes_A	Clostridia	Oscillospirales	Oscillospiraceae	CAG-103	CAG-103 sp000432375
AAQ_51	AAQ	AAQ_b1925_1	20.8	2579283	0	95.27	0	FALSE	none	a		0	0	0	0	Firmicutes_A	Clostridia	Oscillospirales	Ruminococcaceae	Ruminiclostridium_E	Ruminiclostridium_E siraeum
AAQ_52	AAQ	AAQ_b8919_1	19.8	2784798	0	87.74	8.93	FALSE	none	s		0	0	0	0	Firmicutes_A	Clostridia	Lachnospirales	Lachnospiraceae	UMGS1375	UMGS1375 sp900066615
AAQ_53	AAQ	AAQ_b12442_1	19.6	1143852	0	57.43	2.43	FALSE	none			0	0	0	0	Firmicutes_A	Clostridia	Oscillospirales	Oscillospiraceae	ER4	ER4 sp000765235
AAQ_54	AAQ	AAQ_b14640	18	2069842	0	75.21	3.71	FALSE	none	f		0	0	0	0	Actinobacteriota	Coriobacteriia	Coriobacteriales	Eggerthellaceae	Adlercreutzia	Adlercreutzia celatus_A
AAQ_55	AAQ	AAQ_b14527_1	17.7	2753384	0	91.96	3.08	FALSE	none	s		0	0	0	0	Firmicutes_A	Clostridia	Lachnospirales	Lachnospiraceae	CAG-303	CAG-303 sp000437755
AAQ_56	AAQ	AAQ_b10944_1	17.1	2220754	0	97.17	1.18	FALSE	none	t		0	0	0	0	Firmicutes	Bacilli	Erysipelotrichales	Erysipelotrichaceae	Holdemanella	Holdemanella porci
AAQ_57	AAQ	AAQ_b52991_1	15.9	2217908	0	89.72	2.01	FALSE	none	s		0	0	0	0	Firmicutes_A	Clostridia	Lachnospirales	Lachnospiraceae	Eubacterium_F	Eubacterium_F sp000433735
AAQ_58	AAQ	AAQ_b2260	15	2633029	0	91.65	4.81	FALSE	none	s		0	0	0	0	Firmicutes_A	Clostridia	Clostridiales	Clostridiaceae	Clostridium	Clostridium sp000435835
AAQ_59	AAQ	AAQ_b7460_1	14.2	2264304	0	58.41	1.75	FALSE	none			0	0	0	0	Firmicutes_A	Clostridia	Lachnospirales	Lachnospiraceae	Blautia_A	Blautia_A obeum
AAQ_60	AAQ	AAQ_b24871	13.6	2680811	0	91.92	3.24	FALSE	none	a		0	0	0	0	Firmicutes_A	Clostridia	UBA1381	UBA1381	CAG-41	CAG-41 sp900066215
AAQ_61	AAQ	AAQ_b3284_1	13.4	2647461	2	86.29	1.34	FALSE	ok	s		1	1	0	0	Firmicutes_A	Clostridia	Lachnospirales	Lachnospiraceae	Eisenbergiella	Eisenbergiella sp900066775
AAQ_62	AAQ	AAQ_b8702	13.1	1674497	0	70.82	3.38	FALSE	none	s		0	0	0	0	Firmicutes	Bacilli	Lactobacillales	Streptococcaceae	Streptococcus	Streptococcus salivarius
AAQ_63	AAQ	AAQ_b21330_1	12.7	1858886	0	94.28	3	FALSE	none	v		0	0	0	0	Actinobacteriota	Coriobacteriia	Coriobacteriales	QAMH01	QAMH01	QAMH01 sp900556425
AAQ_64	AAQ	AAQ_b29064	10.9	2240703	0	86.3	2.91	FALSE	none	s		0	0	0	0	Firmicutes_A	Clostridia	Lachnospirales	Lachnospiraceae	Coprococcus_A	Coprococcus_A catus
AAQ_65	AAQ	AAQ_b19211_1	10.8	2749259	0	91.95	3.08	FALSE	none	s		0	0	0	0	Firmicutes_A	Clostridia	Lachnospirales	Lachnospiraceae	Eubacterium_F	Eubacterium_F sp003491505
AAQ_66	AAQ	AAQ_b39736	10.3	2332976	0	96.88	0	FALSE	none	t		0	0	0	0	Proteobacteria	Gammaproteobacteria	Burkholderiales	Burkholderiaceae	Mesosutterella	Mesosutterella massiliensis
AAQ_67	AAQ	AAQ_b28672	10.1	2348158	0	59.65	0	FALSE	none			0	0	0	0	Firmicutes_A	Clostridia	Lachnospirales	Lachnospiraceae	Merdisoma	Merdisoma sp900553635
AAQ_68	AAQ	AAQ_b9341_1	10.1	2493135	0	92.07	2.91	FALSE	none	s		0	0	0	0	Firmicutes_A	Clostridia	Lachnospirales	Lachnospiraceae	Eubacterium_G	Eubacterium_G sp000435815
AAQ_69	AAQ	AAQ_b43258_1	9.6	3492538	0	57.24	4.31	FALSE	none			0	0	0	0	Firmicutes_A	Clostridia	Lachnospirales	Lachnospiraceae	Mediterraneibacter	Mediterraneibacter lactaris
AAQ_70	AAQ	AAQ_b1940	9.2	1654726	0	70.64	3.45	FALSE	none			0	0	0	0	Firmicutes_A	Clostridia	Oscillospirales	Oscillospiraceae	CAG-83	CAG-83 sp000431575
AAQ_71	AAQ	AAQ_b23144	9.1	2200327	0	81.46	3.75	FALSE	none			0	0	0	0	Firmicutes_A	Clostridia	Oscillospirales	Oscillospiraceae	Lawsonibacter	Lawsonibacter asaccharolyticus
AAQ_72	AAQ	AAQ_b1452_1	8.9	1967698	0	93.18	1.51	FALSE	none	a		0	0	0	0	Firmicutes_A	Clostridia	Oscillospirales	Ruminococcaceae	Ruminococcus_C	Ruminococcus_C sp000433635
AAQ_73	AAQ	AAQ_b12685_1	8.2	2214912	0	69.62	1.75	FALSE	none	s		0	0	0	0	Firmicutes_A	Clostridia	Lachnospirales	Lachnospiraceae	Coprococcus	Coprococcus eutactus_A
AAQ_74	AAQ	AAQ_b23857_1	6.6	3320094	0	81.68	1.88	FALSE	none			0	0	0	0	Bacteroidota	Bacteroidia	Bacteroidales	Marinifilaceae	Odoribacter	Odoribacter splanchnicus
AAQ_75	AAQ	AAQ_b3272	6.4	1906239	0	51.9	1.72	FALSE	none			0	0	0	0	Firmicutes_A	Clostridia	Oscillospirales	Oscillospiraceae	CAG-170	CAG-170 sp000432135
AAQ_76	AAQ	AAQ_b7928_1	6.2	2186245	0	91.09	0.74	FALSE	none	a		0	0	0	0	Proteobacteria	Gammaproteobacteria	Burkholderiales	Burkholderiaceae	Parasutterella	Parasutterella excrementihominis
AAQ_77	AAQ	AAQ_b23744	6.1	1423093	0	59.11	1.72	FALSE	none	s		0	0	0	0	Firmicutes_A	Clostridia	Oscillospirales	Oscillospiraceae	Evtepia	Evtepia gabavorous
AAQ_78	AAQ	AAQ_b1166	5.3	1320500	0	50.99	1.14	FALSE	none	a		0	0	0	0	Firmicutes_A	Clostridia	Oscillospirales	Ruminococcaceae	Ruminococcus_D	Ruminococcus_D bicirculans
AAQ_79	AAQ	AAQ_b11842_1	4.9	1095283	0	54.02	4.94	FALSE	none	s		0	0	0	0	Firmicutes_A	Clostridia	TANB77	CAG-508	CAG-269	CAG-269 sp000431335
BAA_1	BAA	BAA_b14859	1128.9	2756327	3	95.88	1.4	FALSE	ok	s		3	4	0	0	Firmicutes_A	Clostridia	Lachnospirales	Lachnospiraceae	Eubacterium_I	Eubacterium_I ramulus
BAA_2	BAA	BAA_b22569_1	842	4411338	3	87.64	0.75	TRUE	ok	s	s->f	3	3	1	1	Bacteroidota	Bacteroidia	Bacteroidales	Bacteroidaceae	Phocaeicola	Phocaeicola dorei
BAA_3	BAA	BAA_b12464_1	670.1	910376	3	51.72	0	TRUE	ok			5	6	0	0	Actinobacteriota	Actinomycetia	Actinomycetales	Bifidobacteriaceae	Bifidobacterium	Bifidobacterium pseudocatenulatum
BAA_4	BAA	BAA_b1228_1	586.2	1475459	0	69.94	1.17	TRUE	too_many	s		0	0	0	0	Firmicutes_A	Clostridia	Lachnospirales	Lachnospiraceae	Ruminococcus_B	Ruminococcus_B gnavus
BAA_5	BAA	BAA_b10667_1	546.1	2618356	5	92.16	2.68	TRUE	ok	s		18	13	0	0	Firmicutes_A	Clostridia	Lachnospirales	Lachnospiraceae	Agathobacter	Agathobacter faecis
BAA_6	BAA	BAA_b15025	524.5	2064695	4	96.77	0.81	TRUE	ok	s	s->f	18	22	1	1	Actinobacteriota	Coriobacteriia	Coriobacteriales	Coriobacteriaceae	Collinsella	Collinsella sp003459245
BAA_7	BAA	BAA_b25107	509.9	3307912	4	96.19	1.45	TRUE	ok	s		33	2	1	1	Bacteroidota	Bacteroidia	Bacteroidales	Bacteroidaceae	Bacteroides	Bacteroides stercoris
BAA_8	BAA	BAA_b1757_1	434.5	3357170	3	94.27	0.85	FALSE	ok	s		115	15	0	0	Firmicutes_A	Clostridia	Lachnospirales	Lachnospiraceae	Roseburia	Roseburia intestinalis
BAA_9	BAA	BAA_b19056_1	432.8	2824832	3	93.83	2.69	TRUE	ok	s		75	82	14	16	Firmicutes_A	Clostridia	Lachnospirales	Lachnospiraceae	Oliverpabstia	Oliverpabstia faecicola
BAA_10	BAA	BAA_b24845_1	418.1	2212190	2	91.42	0	TRUE	ok	a		0	0	0	0	Firmicutes_A	Clostridia	Oscillospirales	Ruminococcaceae	Gemmiger	Gemmiger sp900540775
BAA_11	BAA	BAA_b12235_1	415.8	1686439	0	56.06	0	TRUE	too_many			0	0	0	0	Firmicutes_A	Clostridia	Lachnospirales	Lachnospiraceae	Blautia_A	Blautia_A wexlerae
BAA_12	BAA	BAA_b12988	367.9	2413769	0	98.04	0.11	FALSE	none	v		0	0	0	0	Proteobacteria	Gammaproteobacteria	Burkholderiales	Burkholderiaceae	Parasutterella	Parasutterella excrementihominis
BAA_13	BAA	BAA_b9382_1	323.1	2750193	4	96.81	0.22	TRUE	ok	l		29	11	0	0	Firmicutes_A	Clostridia	Lachnospirales	Lachnospiraceae	Lachnospira	Lachnospira sp000437735
BAA_14	BAA	BAA_b7156_1	309.9	2780410	4	95.41	0.67	TRUE	ok	s		42	47	18	20	Firmicutes_A	Clostridia	Lachnospirales	Lachnospiraceae	Anaerobutyricum	Anaerobutyricum hallii
BAA_15	BAA	BAA_b17377	237.4	1405893	2	52.07	0.17	TRUE	ok	s		7	5	0	0	Firmicutes_A	Clostridia	Lachnospirales	Lachnospiraceae	Anaerostipes	Anaerostipes hadrus_A
BAA_16	BAA	BAA_b6174	218.1	2838043	3	72.74	0	FALSE	ok	s		40	23	5	1	Firmicutes_A	Clostridia	Lachnospirales	Lachnospiraceae	Blautia_A	Blautia_A caecimuris
BAA_17	BAA	BAA_b5280_1	203.8	2459225	2	94.22	1.27	TRUE	ok	s		1	1	0	0	Firmicutes_A	Clostridia	Lachnospirales	Lachnospiraceae	Dorea_A	Dorea_A longicatena
BAA_18	BAA	BAA_b2793	199.1	2077129	3	94.45	1.79	TRUE	ok	a	a->v	49	7	1	1	Actinobacteriota	Actinomycetia	Actinomycetales	Bifidobacteriaceae	Bifidobacterium	Bifidobacterium bifidum
BAA_19	BAA	BAA_b28426	186.9	4899847	0	95.23	0.5	TRUE	none			0	0	0	0	Bacteroidota	Bacteroidia	Bacteroidales	Bacteroidaceae	Bacteroides	Bacteroides fragilis
BAA_20	BAA	BAA_b10393_1	166.2	4563466	0	96.73	0	TRUE	none	s		0	0	0	0	Bacteroidota	Bacteroidia	Bacteroidales	Tannerellaceae	Parabacteroides	Parabacteroides distasonis
BAA_21	BAA	BAA_b14162	161.2	1160516	0	54.39	0.88	TRUE	none			0	0	0	0	Firmicutes_A	Clostridia	Lachnospirales	Lachnospiraceae	Anaerostipes	Anaerostipes hadrus_A
BAA_22	BAA	BAA_b12728_1	141.2	2368037	3	89.75	0.39	TRUE	ok	s		5	4	0	0	Firmicutes_A	Clostridia	Lachnospirales	Lachnospiraceae	Mediterraneibacter	Mediterraneibacter faecis
BAA_23	BAA	BAA_b6743	118.9	2648179	0	97.28	0.68	FALSE	none			0	0	0	0	Verrucomicrobiota	Verrucomicrobiae	Verrucomicrobiales	Akkermansiaceae	Akkermansia	Akkermansia muciniphila
BAA_24	BAA	BAA_b10015	112.5	2099438	2	77.7	2.59	TRUE	ok			1	2	0	0	Actinobacteriota	Actinomycetia	Actinomycetales	Bifidobacteriaceae	Bifidobacterium	Bifidobacterium longum
BAA_25	BAA	BAA_b4120	110.2	2372943	0	92.1	0.68	FALSE	none	s		0	0	0	0	Firmicutes_A	Clostridia	Lachnospirales	Lachnospiraceae	Dorea	Dorea formicigenerans
BAA_26	BAA	BAA_b5291_1	91.5	3063466	0	90.99	1.41	FALSE	none	a		0	0	0	0	Firmicutes_A	Clostridia	Oscillospirales	Oscillospiraceae	Flavonifractor	Flavonifractor plautii
BAA_27	BAA	BAA_b13808	81.9	2672569	0	96.77	0.88	FALSE	none			0	0	0	0	Actinobacteriota	Coriobacteriia	Coriobacteriales	Eggerthellaceae	Adlercreutzia	Adlercreutzia equolifaciens
BAA_28	BAA	BAA_b15715_2	78.4	2848273	0	74.19	2.63	FALSE	none	s		0	0	0	0	Firmicutes_A	Clostridia	Lachnospirales	Lachnospiraceae	Roseburia	Roseburia inulinivorans
BAA_29	BAA	BAA_b11815	78	2454778	0	93.71	4.11	FALSE	none	s		0	0	0	0	Firmicutes_A	Clostridia	Lachnospirales	Lachnospiraceae	Faecalimonas	Faecalimonas umbilicata
BAA_30	BAA	BAA_b25320	74.5	2584554	3	75.98	1.75	FALSE	ok			30	17	0	0	Firmicutes_A	Clostridia	Lachnospirales	Lachnospiraceae	Blautia_A	Blautia_A obeum
BAA_31	BAA	BAA_b25905	73.6	1911474	0	92.12	0.34	FALSE	none	v		0	0	0	0	Firmicutes_A	Clostridia	Oscillospirales	Oscillospiraceae	CAG-103	CAG-103 sp000432375
BAA_32	BAA	BAA_b5426	63.9	2123361	0	93.94	0.85	FALSE	none	a		0	0	0	0	Firmicutes_A	Clostridia	Oscillospirales	Ruminococcaceae	Faecalibacterium	Faecalibacterium prausnitzii_G
BAA_33	BAA	BAA_b12023	63.2	2167648	2	90.77	1.59	FALSE	ok			7	4	1	1	Firmicutes_A	Clostridia	Oscillospirales	Butyricicoccaceae	Agathobaculum	Agathobaculum butyriciproducens
BAA_34	BAA	BAA_b14634	57.8	1815071	0	83.44	1.59	FALSE	none			0	0	0	0	Firmicutes_A	Clostridia	Oscillospirales	Butyricicoccaceae	Agathobaculum	Agathobaculum sp003481705
BAA_35	BAA	BAA_b11779	52	2650929	0	94.43	1.73	FALSE	none	s		0	0	0	0	Firmicutes_A	Clostridia	Lachnospirales	Lachnospiraceae	Lachnospira	Lachnospira eligens_A
BAA_36	BAA	BAA_b30032	51.6	2379944	0	84.78	2.11	FALSE	none	s		0	0	0	0	Firmicutes_A	Clostridia	Lachnospirales	Lachnospiraceae	Clostridium_Q	Clostridium_Q fessum
BAA_37	BAA	BAA_b14504_1	47.2	2253064	0	97.96	0	FALSE	none	a		0	0	0	0	Firmicutes_A	Clostridia	Oscillospirales	Acutalibacteraceae	UBA1417	UBA1417 sp003531055
BAA_38	BAA	BAA_b4576_1	44.6	2393620	0	89.76	1.91	FALSE	none			0	0	0	0	Firmicutes_A	Clostridia	Lachnospirales	Lachnospiraceae	Blautia	Blautia hansenii
BAA_39	BAA	BAA_b6036_1	42.1	2717484	2	62.44	1.75	FALSE	ok			2	1	0	0	Firmicutes_A	Clostridia	Lachnospirales	Lachnospiraceae	Roseburia	Roseburia hominis
BAA_40	BAA	BAA_b7265	41.6	2537419	0	91.47	0.47	FALSE	none	s		0	0	0	0	Firmicutes_A	Clostridia	Lachnospirales	Lachnospiraceae	Butyribacter	Butyribacter sp003529475
BAA_41	BAA	BAA_b6639_1	40.6	2284715	0	95.27	1.68	FALSE	none	s		0	0	0	0	Firmicutes_A	Clostridia	Lachnospirales	Lachnospiraceae	Eubacterium_G	Eubacterium_G ventriosum
BAA_42	BAA	BAA_b29958	36.2	2666699	0	97.26	1.37	FALSE	none	a		0	0	0	0	Firmicutes_A	Clostridia	Oscillospirales	Ruminococcaceae	Ruminococcus_D	Ruminococcus_D bicirculans
BAA_43	BAA	BAA_b2369	32.3	4858492	2	77.37	1.75	FALSE	ok	s		1	1	0	0	Firmicutes_A	Clostridia	Lachnospirales	Lachnospiraceae	Enterocloster	Enterocloster aldenensis
BAA_44	BAA	BAA_b1758	29.2	3215338	0	100	0	FALSE	none	s		0	0	0	0	Firmicutes	Bacilli	Erysipelotrichales	Coprobacillaceae	Erysipelatoclostridium	Erysipelatoclostridium ramosum
BAA_45	BAA	BAA_b10524_1	27.6	2542974	0	94.44	4.72	FALSE	none			0	0	0	0	Firmicutes_A	Clostridia	Oscillospirales	Oscillospiraceae	Lawsonibacter	Lawsonibacter asaccharolyticus
BAA_46	BAA	BAA_b12172	27.1	3040392	0	69.81	1.75	FALSE	none	s		0	0	0	0	Firmicutes_A	Clostridia	Lachnospirales	Lachnospiraceae	Enterocloster	Enterocloster sp900538485
BAA_47	BAA	BAA_b11770_1	25.9	1484118	0	87.96	3.17	FALSE	none	s		0	0	0	0	Firmicutes	Bacilli	Lactobacillales	Streptococcaceae	Streptococcus	Streptococcus thermophilus
BAA_48	BAA	BAA_b8602	24	3126155	0	84.17	0.67	FALSE	none	s		0	0	0	0	Firmicutes_A	Clostridia	Lachnospirales	Lachnospiraceae	Butyribacter	Butyribacter intestini
BAA_49	BAA	BAA_b25962	23.7	1921274	0	54.06	0	FALSE	none			0	0	0	0	Firmicutes_A	Clostridia	Oscillospirales	Ruminococcaceae	Gemmiger	Gemmiger qucibialis
BAA_50	BAA	BAA_b8365_1	21.5	2216096	0	84.51	2.02	FALSE	none	s		0	0	0	0	Firmicutes_A	Clostridia	Lachnospirales	Lachnospiraceae	Mediterraneibacter	Mediterraneibacter torques
BAA_51	BAA	BAA_b10380_1	21.2	2547918	0	62.9	0	FALSE	none			0	0	0	0	Firmicutes_A	Clostridia	Lachnospirales	Lachnospiraceae	Ventrimonas	Ventrimonas sp003480315
BAA_52	BAA	BAA_b9657	20.9	3969941	0	97.6	0	FALSE	none	s		0	0	0	0	Desulfobacterota_I	Desulfovibrionia	Desulfovibrionales	Desulfovibrionaceae	Bilophila	Bilophila wadsworthia
BAA_53	BAA	BAA_b10798	19.8	2149598	0	89.99	3.02	FALSE	none	a		0	0	0	0	Firmicutes_A	Clostridia	Oscillospirales	Oscillospiraceae	Dysosmobacter	Dysosmobacter welbionis
BAA_54	BAA	BAA_b2586_1	19.2	3087688	0	68.42	0	FALSE	none	s		0	0	0	0	Firmicutes_A	Clostridia	Lachnospirales	Lachnospiraceae	Limivivens	Limivivens sp900543575
BAA_55	BAA	BAA_b17830_1	18.8	2691077	0	96.55	2.01	FALSE	none	a		0	0	0	0	Firmicutes_A	Clostridia	UBA1381	UBA1381	CAG-41	CAG-41 sp900066215
BAA_56	BAA	BAA_b14926	14.2	2375564	0	57.55	3.45	FALSE	none	s		0	0	0	0	Firmicutes_A	Clostridia	Lachnospirales	Lachnospiraceae	Sellimonas	Sellimonas intestinalis
BAA_57	BAA	BAA_b2960_1	12.9	1794794	0	51.93	0	FALSE	none			0	0	0	0	Firmicutes_A	Clostridia	Lachnospirales	Lachnospiraceae	Choladocola	Choladocola sp003480725
BAA_58	BAA	BAA_b19739	12.3	1560034	0	78.64	2.4	FALSE	none	s		0	0	0	0	Firmicutes_A	Clostridia	Lachnospirales	Anaerotignaceae	Anaerotignum	Anaerotignum faecicola
BAA_59	BAA	BAA_b4958_1	12.1	1403604	0	68.78	0.7	FALSE	none	s		0	0	0	0	Firmicutes_A	Clostridia	Peptostreptococcales	Peptostreptococcaceae	Romboutsia	Romboutsia timonensis
BAA_60	BAA	BAA_b11010	12	1401213	0	50.11	0	FALSE	none			0	0	0	0	Firmicutes_A	Clostridia	Oscillospirales	Oscillospiraceae	Dysosmobacter	Dysosmobacter sp900542115
BAB_1	BAB	BAB_b1925_1	1405.9	2840447	7	68.45	3.45	TRUE	ok			24	20	0	0	Bacteroidota	Bacteroidia	Bacteroidales	Bacteroidaceae	Bacteroides	Bacteroides stercoris
BAB_2	BAB	BAB_b8076_1	1012.3	2260738	0	67.1	0	TRUE	too_many			0	0	0	0	Bacteroidota	Bacteroidia	Bacteroidales	Bacteroidaceae	Phocaeicola	Phocaeicola dorei
BAB_3	BAB	BAB_b15797_1	972.2	1443491	0	83.13	1.58	TRUE	too_many	s		0	0	0	0	Firmicutes_A	Clostridia	Lachnospirales	Lachnospiraceae	Agathobacter	Agathobacter rectalis
BAB_4	BAB	BAB_b6838_3	862.7	4218927	7	74.64	1.72	TRUE	ok	s	s->l	35	17	0	0	Bacteroidota	Bacteroidia	Bacteroidales	Bacteroidaceae	Bacteroides	Bacteroides uniformis
BAB_5	BAB	BAB_b9864_1	658.6	5876916	3	70.17	0	TRUE	ok	s		153	38	0	0	Bacteroidota	Bacteroidia	Bacteroidales	Bacteroidaceae	Bacteroides	Bacteroides thetaiotaomicron
BAB_6	BAB	BAB_b26191_1	640.1	2662755	3	93.49	0	TRUE	ok	s		117	50	0	0	Firmicutes_A	Clostridia	Lachnospirales	Lachnospiraceae	Blautia_A	Blautia_A massiliensis
BAB_7	BAB	BAB_b9458_1	562.9	2835638	0	95.24	0	TRUE	none			0	0	0	0	Verrucomicrobiota	Verrucomicrobiae	Verrucomicrobiales	Akkermansiaceae	Akkermansia	Akkermansia muciniphila_B
BAB_8	BAB	BAB_b5248_1	470.9	1674589	3	61.45	1.9	TRUE	ok			105	80	0	0	Firmicutes_A	Clostridia	Lachnospirales	Lachnospiraceae	Fusicatenibacter	Fusicatenibacter saccharivorans
BAB_9	BAB	BAB_b24381_2	391.6	2898642	5	94.86	3.93	TRUE	ok	s		101	24	0	0	Firmicutes_A	Clostridia	Lachnospirales	Lachnospiraceae	Agathobacter	Agathobacter faecis
BAB_10	BAB	BAB_b33457_1	263.3	2240946	3	89.4	0.23	TRUE	ok			57	38	0	0	Firmicutes_A	Clostridia	Oscillospirales	Ruminococcaceae	Gemmiger	Gemmiger sp900540595
BAB_11	BAB	BAB_b3184	261.5	2107298	3	91.13	0.81	TRUE	ok	s	s->f	3	3	1	1	Actinobacteriota	Coriobacteriia	Coriobacteriales	Coriobacteriaceae	Collinsella	Collinsella sp.
BAB_12	BAB	BAB_b689_1	232.8	2950593	2	99.29	1.2	TRUE	ok	l		1	2	0	0	Bacteroidota	Bacteroidia	Bacteroidales	Rikenellaceae	Alistipes	Alistipes communis
BAB_13	BAB	BAB_b7201_1	231.9	2125678	3	88.45	4.14	TRUE	ok			125	69	0	0	Firmicutes_A	Clostridia	Lachnospirales	Lachnospiraceae	Anaerostipes	Anaerostipes hadrus_A
BAB_14	BAB	BAB_b28624	180.6	1914260	0	97.99	0	TRUE	none	a		0	0	0	0	Firmicutes_A	Clostridia	Oscillospirales	Acutalibacteraceae	Eubacterium_R	Eubacterium_R sp003526845
BAB_15	BAB	BAB_b36541_1	165.7	2181647	2	93.07	0.68	FALSE	ok	a		2	2	0	0	Firmicutes_A	Clostridia	Oscillospirales	Ruminococcaceae	Gemmiger	Gemmiger qucibialis
BAB_16	BAB	BAB_b25639	164.2	2103487	3	91.09	1.53	TRUE	ok			2	2	1	1	Actinobacteriota	Actinomycetia	Actinomycetales	Bifidobacteriaceae	Bifidobacterium	Bifidobacterium longum
BAB_17	BAB	BAB_b11357_1	164.1	2451045	3	82.51	0.63	TRUE	ok			38	13	4	3	Firmicutes_A	Clostridia	Lachnospirales	Lachnospiraceae	Blautia_A	Blautia_A wexlerae
BAB_18	BAB	BAB_b31505_1	156.8	2581317	3	97.26	0.68	TRUE	ok	a		35	37	18	21	Firmicutes_A	Clostridia	Oscillospirales	Ruminococcaceae	Ruminococcus_D	Ruminococcus_D bicirculans
BAB_19	BAB	BAB_b39389_1	153.9	2094631	0	87.97	0.19	TRUE	too_many	s		0	0	0	0	Firmicutes_A	Clostridia	Lachnospirales	Lachnospiraceae	Dorea_A	Dorea_A longicatena
BAB_20	BAB	BAB_b9920_1	147.8	2889503	6	95.36	0.84	FALSE	ok	s		20	17	2	2	Firmicutes_A	Clostridia	Lachnospirales	Lachnospiraceae	Anaerobutyricum	Anaerobutyricum hallii
BAB_21	BAB	BAB_b24635_1	134.1	2494338	2	96.31	0	FALSE	ok	s		4	2	0	0	Firmicutes_A	Clostridia	Lachnospirales	Lachnospiraceae	Lachnospira	Lachnospira eligens_A
BAB_22	BAB	BAB_b17155_1	132.6	1587765	4	95.96	0.23	TRUE	ok	s		461	307	0	0	Firmicutes	Bacilli	Lactobacillales	Streptococcaceae	Streptococcus	Streptococcus thermophilus
BAB_23	BAB	BAB_b35640	131.6	2822101	2	100	0	TRUE	ok	s		16	16	13	13	Proteobacteria	Gammaproteobacteria	Burkholderiales	Burkholderiaceae	Sutterella	Sutterella wadsworthensis
BAB_24	BAB	BAB_b7770_1	120.5	1806860	0	67.55	0	FALSE	too_many			0	0	0	0	Firmicutes_A	Clostridia	Lachnospirales	Lachnospiraceae	Mediterraneibacter	Mediterraneibacter faecis
BAB_25	BAB	BAB_b787_1	119.8	2695986	3	94.36	2.13	FALSE	ok	s		9	3	0	0	Firmicutes_A	Clostridia	Lachnospirales	Lachnospiraceae	Eubacterium_I	Eubacterium_I ramulus
BAB_26	BAB	BAB_b2977	118.8	2082599	2	96.1	0	TRUE	ok	a		1	1	0	0	Firmicutes_A	Clostridia	Oscillospirales	Acutalibacteraceae	UBA1417	UBA1417 sp003531055
BAB_27	BAB	BAB_b36649_1	114.7	2185805	2	90.35	2.19	FALSE	ok	s		38	22	5	5	Firmicutes_A	Clostridia	Lachnospirales	Lachnospiraceae	Bariatricus	Bariatricus comes
BAB_28	BAB	BAB_b21751	103.6	2600664	0	85.5	0.86	FALSE	none			0	0	0	0	Bacteroidota	Bacteroidia	Bacteroidales	Rikenellaceae	Alistipes	Alistipes shahii
BAB_29	BAB	BAB_b37252	102.8	1992823	0	88.11	2.35	FALSE	none			0	0	0	0	Firmicutes_A	Clostridia	Oscillospirales	Oscillospiraceae	CAG-83	CAG-83 sp000431575
BAB_30	BAB	BAB_b5920_1	84.5	2144503	0	91.8	2.34	FALSE	too_many	s		0	0	0	0	Firmicutes_A	Clostridia	Lachnospirales	Lachnospiraceae	Dorea	Dorea formicigenerans
BAB_31	BAB	BAB_b8475_1	77.2	2221635	3	89.09	2.18	FALSE	ok	a		13	14	0	0	Firmicutes_A	Clostridia	Oscillospirales	Oscillospiraceae	Dysosmobacter	Dysosmobacter welbionis
BAB_32	BAB	BAB_b23899	75.5	2175918	2	73.76	1.72	FALSE	ok	s		1	0	1	0	Firmicutes_A	Clostridia	Lachnospirales	Lachnospiraceae	Mediterraneibacter	Mediterraneibacter lactaris
BAB_33	BAB	BAB_b26740_1	73.8	3144717	2	93.91	1.58	FALSE	ok	s		3	3	1	1	Firmicutes_A	Clostridia	Lachnospirales	Lachnospiraceae	KLE1615	KLE1615 sp900066985
BAB_34	BAB	BAB_b3017	71.2	3167801	0	95.81	0.13	FALSE	none	s		0	0	0	0	Firmicutes_A	Clostridia	Lachnospirales	Lachnospiraceae	Butyribacter	Butyribacter intestini
BAB_35	BAB	BAB_b9719	70.5	2704186	0	97.8	3.27	FALSE	none	f		0	0	0	0	Actinobacteriota	Coriobacteriia	Coriobacteriales	Eggerthellaceae	Adlercreutzia	Adlercreutzia equolifaciens
BAB_36	BAB	BAB_b35565	69.5	4404466	2	96.91	0.46	FALSE	ok	s		2	3	2	3	Bacteroidota	Bacteroidia	Bacteroidales	Tannerellaceae	Parabacteroides	Parabacteroides distasonis
BAB_37	BAB	BAB_b30995_1	67.5	1543004	0	75.55	1.79	FALSE	none	a		0	0	0	0	Firmicutes_A	Clostridia	TANB77	CAG-508	CAG-269	CAG-269 sp003525075
BAB_38	BAB	BAB_b451_1	66.6	2353601	0	98.12	1.34	FALSE	none	s		0	0	0	0	Firmicutes_A	Clostridia	Lachnospirales	Lachnospiraceae	Eubacterium_G	Eubacterium_G ventriosum
BAB_39	BAB	BAB_b4915_1	65.7	2648607	0	75.76	1.75	FALSE	none	s		0	0	0	0	Firmicutes_A	Clostridia	Lachnospirales	Lachnospiraceae	Oliverpabstia	Oliverpabstia intestinalis
BAB_40	BAB	BAB_b18290	63.8	2666070	0	93.76	1.48	FALSE	none	s		0	0	0	0	Firmicutes_A	Clostridia	Lachnospirales	Lachnospiraceae	Clostridium_Q	Clostridium_Q sp000435655
BAB_41	BAB	BAB_b6433	60.8	2104072	0	75.5	1.72	FALSE	none			0	0	0	0	Firmicutes_A	Clostridia	Oscillospirales	Oscillospiraceae	Lawsonibacter	Lawsonibacter asaccharolyticus
BAB_42	BAB	BAB_b8784	56.2	2236056	0	91.06	1.57	FALSE	none	a		0	0	0	0	Firmicutes_A	Clostridia	Oscillospirales	Butyricicoccaceae	Agathobaculum	Agathobaculum butyriciproducens
BAB_43	BAB	BAB_b3145_1	52.9	2858519	2	76.58	1.81	FALSE	ok	a		1	1	0	0	Firmicutes_A	Clostridia	Oscillospirales	Oscillospiraceae	Flavonifractor	Flavonifractor plautii
BAB_44	BAB	BAB_b18314_1	52.2	2807045	0	79.82	4.39	FALSE	none	s		0	0	0	0	Firmicutes_A	Clostridia	Lachnospirales	Lachnospiraceae	Roseburia	Roseburia hominis
BAB_45	BAB	BAB_b26368_1	48.7	2656332	3	54.02	2.63	FALSE	ok			13	4	0	0	Firmicutes_A	Clostridia	Lachnospirales	Lachnospiraceae	Blautia_A	Blautia_A faecis
BAB_46	BAB	BAB_b27613_1	48.6	2579673	2	91.47	1.9	FALSE	ok	s		0	0	0	0	Firmicutes_A	Clostridia	Lachnospirales	Lachnospiraceae	Lachnospira	Lachnospira sp000437735
BAB_47	BAB	BAB_b1165	46.8	1884190	0	93.94	1.56	FALSE	none	i		0	0	0	0	Bacteroidota	Bacteroidia	Bacteroidales	Rikenellaceae	Alistipes	Alistipes putredinis
BAB_48	BAB	BAB_b4919	44.9	2517824	0	90.28	0.63	FALSE	none	s		0	0	0	0	Firmicutes_A	Clostridia	Lachnospirales	Lachnospiraceae	UMGS1375	UMGS1375 sp900066615
BAB_49	BAB	BAB_b24161_1	42.5	2429237	0	86.83	2.84	FALSE	none	s		0	0	0	0	Firmicutes_A	Clostridia	Lachnospirales	Lachnospiraceae	Eisenbergiella	Eisenbergiella sp900066775
BAB_50	BAB	BAB_b16770_1	38.5	4175304	0	97.63	0	FALSE	none	s		0	0	0	0	Bacteroidota	Bacteroidia	Bacteroidales	Marinifilaceae	Odoribacter	Odoribacter splanchnicus
BAB_51	BAB	BAB_b3064	38	2641628	0	87.76	1.42	FALSE	none	s		0	0	0	0	Firmicutes_A	Clostridia	Lachnospirales	Lachnospiraceae	Ventrimonas	Ventrimonas sp003480315
BAB_52	BAB	BAB_b3672_1	36	3078001	0	76.44	1.75	FALSE	none	s		0	0	0	0	Firmicutes_A	Clostridia	Lachnospirales	Lachnospiraceae	Limivivens	Limivivens sp900543575
BAB_53	BAB	BAB_b19994	34.2	1942727	0	73.49	5.17	FALSE	none			0	0	0	0	Firmicutes_A	Clostridia	Oscillospirales	Oscillospiraceae	Lawsonibacter	Lawsonibacter sp900066825
BAB_54	BAB	BAB_b24376	33.3	1835090	0	70.56	2.59	FALSE	none	a		0	0	0	0	Firmicutes_A	Clostridia	Oscillospirales	Butyricicoccaceae	Agathobaculum	Agathobaculum sp003481705
BAB_55	BAB	BAB_b19696_1	30.8	3028340	0	89.48	1.7	FALSE	none	a		0	0	0	0	Firmicutes_A	Clostridia	Oscillospirales	Ruminococcaceae	Ruthenibacterium	Ruthenibacterium lactatiformans
BAB_56	BAB	BAB_b3417	30.6	2044342	2	96.42	0	FALSE	ok	s		3	1	0	0	Firmicutes_A	Clostridia	Lachnospirales	Anaerotignaceae	Anaerotignum	Anaerotignum faecicola
BAB_57	BAB	BAB_b38331_1	29.6	2354302	0	50.88	7.02	FALSE	none	s		0	0	0	0	Firmicutes_A	Clostridia	Lachnospirales	Lachnospiraceae	Coprococcus_A	Coprococcus_A catus
BAB_58	BAB	BAB_b7612	29.5	1636398	0	94.98	0.12	FALSE	none	i		0	0	0	0	Actinobacteriota	Coriobacteriia	Coriobacteriales	Eggerthellaceae	CAG-1427	CAG-1427 sp000435675
BAB_59	BAB	BAB_b36327	29.3	5117165	0	97.43	1.05	FALSE	none	s		0	0	0	0	Bacteroidota	Bacteroidia	Bacteroidales	Marinifilaceae	Butyricimonas	Butyricimonas paravirosa
BAB_60	BAB	BAB_b5948	26	4120303	0	97.3	0.03	FALSE	none	s		0	0	0	0	Desulfobacterota_I	Desulfovibrionia	Desulfovibrionales	Desulfovibrionaceae	Bilophila	Bilophila wadsworthia
BAB_61	BAB	BAB_b8428	26	2101997	0	83.25	1.9	FALSE	none			0	0	0	0	Firmicutes_A	Clostridia	Oscillospirales	Oscillospiraceae	Evtepia	Evtepia excrementipullorum
BAB_62	BAB	BAB_b11779_1	25.3	2722170	0	98.03	0.47	FALSE	none	s		0	0	0	0	Firmicutes	Bacilli	Erysipelotrichales	Coprobacillaceae	Faecalibacillus	Faecalibacillus intestinalis
BAB_63	BAB	BAB_b30610	25.2	2718735	0	98.17	1.48	FALSE	none	s		0	0	0	0	Firmicutes_A	Clostridia	Christensenellales	CAG-74	Ventricola	Ventricola sp900542445
BAB_64	BAB	BAB_b29032_1	23.9	2453086	0	91.11	0.34	FALSE	none			0	0	0	0	Firmicutes_A	Clostridia	Lachnospirales	Lachnospiraceae	Butyribacter	Butyribacter sp003529475
BAB_65	BAB	BAB_b4976_1	23.8	3119518	0	62.07	0	FALSE	none			0	0	0	0	Firmicutes_A	Clostridia	Lachnospirales	Lachnospiraceae	Enterocloster	Enterocloster sp000431375
BAB_66	BAB	BAB_b7440	22.8	1813258	0	81.76	1.7	FALSE	none			0	0	0	0	Firmicutes_A	Clostridia	Oscillospirales	Oscillospiraceae	UMGS1766	UMGS1766 sp900554855
BAB_67	BAB	BAB_b26301_1	22.6	3137454	0	85.19	2.55	FALSE	none			0	0	0	0	Firmicutes_A	Clostridia	Lachnospirales	Lachnospiraceae	Blautia_A	Blautia_A hydrogenotrophica
BAB_68	BAB	BAB_b14326_1	19.8	2233194	0	66.46	5.26	FALSE	none	s		0	0	0	0	Firmicutes_A	Clostridia	Lachnospirales	Lachnospiraceae	Lachnospira	Lachnospira sp900316325
BAB_69	BAB	BAB_b27444	16.8	1486319	0	57.26	1.68	FALSE	none	s		0	0	0	0	Firmicutes_A	Clostridia	Lachnospirales	Lachnospiraceae	Eubacterium_F	Eubacterium_F sp003491505
BAB_70	BAB	BAB_b2027_1	12.8	1108537	0	56.33	2.01	FALSE	none	a		0	0	0	0	Firmicutes_A	Clostridia	UBA1381	UBA1381	CAG-41	CAG-41 sp900066215
BAC_1	BAC	BAC_b36969	1880.1	2598256	3	96.94	0	TRUE	ok			15	15	0	0	Verrucomicrobiota	Verrucomicrobiae	Verrucomicrobiales	Akkermansiaceae	Akkermansia	Akkermansia muciniphila
BAC_2	BAC	BAC_b35898_1	816.8	3330088	0	89.29	0.08	TRUE	too_many	f		0	0	0	0	Bacteroidota	Bacteroidia	Bacteroidales	Bacteroidaceae	Phocaeicola	Phocaeicola vulgatus
BAC_3	BAC	BAC_b32017_1	717.5	2309502	4	94.31	0.72	TRUE	ok	s		296	52	0	0	Firmicutes_A	Clostridia	Lachnospirales	Lachnospiraceae	Agathobacter	Agathobacter rectalis
BAC_4	BAC	BAC_b21061_1	618.9	2911815	5	94.52	3.31	TRUE	ok	s		50	28	0	0	Firmicutes_A	Clostridia	Lachnospirales	Lachnospiraceae	Agathobacter	Agathobacter faecis
BAC_5	BAC	BAC_b24713_2	560.2	1314362	0	55.25	0	TRUE	too_many			0	0	0	0	Firmicutes_A	Clostridia	Lachnospirales	Lachnospiraceae	Blautia_A	Blautia_A wexlerae
BAC_6	BAC	BAC_b22512_1	477.6	3858454	3	62.93	0.86	TRUE	ok			32	14	0	0	Bacteroidota	Bacteroidia	Bacteroidales	Bacteroidaceae	Bacteroides	Bacteroides caccae
BAC_7	BAC	BAC_b30266	366.4	1854992	3	80.62	0.09	TRUE	ok			8	10	0	0	Bacteroidota	Bacteroidia	Bacteroidales	Muribaculaceae	CAG-1031	CAG-1031 sp000431215
BAC_8	BAC	BAC_b15623_1	228	2492769	0	97.51	0	FALSE	none	a		0	0	0	0	Firmicutes_A	Clostridia	Oscillospirales	Ruminococcaceae	Ruminococcus_D	Ruminococcus_D bicirculans
BAC_9	BAC	BAC_b25329	217.9	2306398	4	92.06	0.35	TRUE	ok			13	11	5	6	Firmicutes_A	Clostridia	Oscillospirales	Ruminococcaceae	Gemmiger	Gemmiger formicilis
BAC_10	BAC	BAC_b15738	206.4	2897876	3	96.17	5.05	TRUE	ok	l		11	10	1	1	Bacteroidota	Bacteroidia	Bacteroidales	Rikenellaceae	Alistipes	Alistipes onderdonkii
BAC_11	BAC	BAC_b2891	205.3	1911976	0	95.93	0.96	FALSE	none	s		0	0	0	0	Bacteroidota	Bacteroidia	Bacteroidales	Rikenellaceae	Alistipes	Alistipes putredinis
BAC_12	BAC	BAC_b50486_1	175.7	2406607	3	93.79	0.12	TRUE	ok	s		80	75	0	0	Firmicutes_A	Clostridia	Lachnospirales	Lachnospiraceae	Bariatricus	Bariatricus comes
BAC_13	BAC	BAC_b33843_1	171.3	2567338	2	91.56	0	FALSE	ok	s		8	3	0	0	Firmicutes_A	Clostridia	Lachnospirales	Lachnospiraceae	Eubacterium_I	Eubacterium_I ramulus
BAC_14	BAC	BAC_b8271	162.5	2477410	3	90.79	0.81	TRUE	ok			153	53	0	0	Actinobacteriota	Coriobacteriia	Coriobacteriales	Eggerthellaceae	Adlercreutzia	Adlercreutzia celatus_A
BAC_15	BAC	BAC_b2121	144	1712203	0	85.24	1.68	FALSE	none			0	0	0	0	Firmicutes_A	Clostridia	Oscillospirales	Oscillospiraceae	CAG-83	CAG-83 sp000435555
BAC_16	BAC	BAC_b1962_1	139.3	2277790	0	57.53	0	FALSE	too_many			0	0	0	0	Firmicutes_A	Clostridia	Lachnospirales	Lachnospiraceae	Acetatifactor	Acetatifactor intestinalis
BAC_17	BAC	BAC_b798_1	138.5	2759408	3	98.26	0.42	TRUE	ok	s		37	18	1	2	Firmicutes_A	Clostridia	Lachnospirales	Lachnospiraceae	Eubacterium_F	Eubacterium_F sp003491505
BAC_18	BAC	BAC_b16659_1	137.1	2262092	3	98.11	0	TRUE	ok	a		3	4	1	1	Firmicutes_A	Clostridia	Oscillospirales	Acutalibacteraceae	UBA1417	UBA1417 sp003531055
BAC_19	BAC	BAC_b4642_1	121.9	2627108	2	89.45	3.18	FALSE	ok			1	1	0	0	Firmicutes_A	Clostridia	Lachnospirales	Lachnospiraceae	Blautia_A	Blautia_A massiliensis
BAC_20	BAC	BAC_b24078_1	119.6	2417039	2	89.26	1.31	FALSE	ok			2	2	0	0	Firmicutes_A	Clostridia	Lachnospirales	Lachnospiraceae	Eisenbergiella	Eisenbergiella sp900066775
BAC_21	BAC	BAC_b31572	114.7	2262998	0	85.49	0.75	FALSE	none	s		0	0	0	0	Bacteroidota	Bacteroidia	Bacteroidales	Muribaculaceae	UBA7173	UBA7173 sp900545955
BAC_22	BAC	BAC_b19382_1	111	4968033	2	77.23	1.72	FALSE	ok	f		1	1	1	1	Bacteroidota	Bacteroidia	Bacteroidales	Bacteroidaceae	Bacteroides	Bacteroides salyersiae
BAC_23	BAC	BAC_b13276	109.9	6274843	2	78.71	0	TRUE	ok	s	s->a	3	4	3	4	Bacteroidota	Bacteroidia	Bacteroidales	Bacteroidaceae	Bacteroides	Bacteroides cellulosilyticus
BAC_24	BAC	BAC_b15345_1	102.9	1617180	0	75.02	0.78	FALSE	too_many			0	0	0	0	Firmicutes_A	Clostridia	Lachnospirales	Lachnospiraceae	Mediterraneibacter	Mediterraneibacter faecis
BAC_25	BAC	BAC_b38546	100.8	2638755	0	93.89	2.88	TRUE	none	l		0	0	0	0	Bacteroidota	Bacteroidia	Bacteroidales	Rikenellaceae	Alistipes	Alistipes communis
BAC_26	BAC	BAC_b2039_1	98.3	3093514	2	76.64	3.45	TRUE	ok			59	47	2	1	Firmicutes_A	Clostridia	Oscillospirales	Oscillospiraceae	Flavonifractor	Flavonifractor plautii
BAC_27	BAC	BAC_b2778	97.1	1870928	0	90.55	0.91	FALSE	none	a		0	0	0	0	Firmicutes_A	Clostridia	Oscillospirales	Oscillospiraceae	ER4	ER4 sp000765235
BAC_28	BAC	BAC_b28601	96.8	2517156	0	97.16	0.13	FALSE	none			0	0	0	0	Firmicutes_A	Clostridia	Lachnospirales	Lachnospiraceae	Coprococcus	Coprococcus sp900066115
BAC_29	BAC	BAC_b23686	95.8	1757890	3	85.11	3.88	FALSE	ok			3	3	0	0	Firmicutes_A	Clostridia	Oscillospirales	Oscillospiraceae	CAG-103	CAG-103 sp000432375
BAC_30	BAC	BAC_b8803	92	1846534	2	53.99	5.26	FALSE	ok			21	9	0	0	Firmicutes_A	Clostridia	Lachnospirales	Lachnospiraceae	Anaerostipes	Anaerostipes hadrus_A
BAC_31	BAC	BAC_b25302	84.3	2355325	0	99.98	1.5	TRUE	none	i		0	0	0	0	Firmicutes_C	Negativicutes	Acidaminococcales	Acidaminococcaceae	Phascolarctobacterium	Phascolarctobacterium faecium
BAC_32	BAC	BAC_b6786_1	84.3	3278670	2	96.41	2.37	FALSE	ok	s		20	6	2	2	Firmicutes_A	Clostridia	Lachnospirales	Lachnospiraceae	KLE1615	KLE1615 sp900066985
BAC_33	BAC	BAC_b34248_1	78.4	1876420	0	96.28	0	FALSE	none	a		0	0	0	0	Firmicutes_A	Clostridia	Oscillospirales	Acutalibacteraceae	CAG-217	CAG-217 sp000436335
BAC_34	BAC	BAC_b3792_1	77.4	2986923	0	96.85	1.17	FALSE	none	s		0	0	0	0	Firmicutes_A	Clostridia	Christensenellales	CAG-74	UBA11524	UBA11524 sp000437595
BAC_35	BAC	BAC_b27284_1	73.8	2812342	2	93.09	0.63	FALSE	ok	s		24	3	16	2	Firmicutes_A	Clostridia	Lachnospirales	Lachnospiraceae	Marvinbryantia	Marvinbryantia sp014385005
BAC_36	BAC	BAC_b23366_1	72.3	1585497	0	81.88	0	FALSE	none	a		0	0	0	0	Firmicutes_A	Clostridia	Oscillospirales	Ruminococcaceae	Ruminococcus_C	Ruminococcus_C sp000437255
BAC_37	BAC	BAC_b25317_1	71.8	1737063	0	84.19	2.68	FALSE	too_many			0	0	0	0	Firmicutes_A	Clostridia	Oscillospirales	Butyricicoccaceae	Agathobaculum	Agathobaculum butyriciproducens
BAC_38	BAC	BAC_b10752	70.8	2889763	0	87.43	3.22	FALSE	none	s		0	0	0	0	Firmicutes_A	Clostridia	Lachnospirales	Lachnospiraceae	Roseburia	Roseburia inulinivorans
BAC_39	BAC	BAC_b33443	68.4	2224333	0	90.04	0.82	FALSE	none			0	0	0	0	Firmicutes_A	Clostridia	Oscillospirales	Ruminococcaceae	Gemmiger	Gemmiger qucibialis
BAC_40	BAC	BAC_b15708_1	67.1	2509960	3	94.58	0.95	FALSE	ok	s		5	1	0	0	Firmicutes_A	Clostridia	Lachnospirales	Lachnospiraceae	Clostridium_Q	Clostridium_Q fessum
BAC_41	BAC	BAC_b17255_1	65.3	3115655	3	95.43	4.69	FALSE	ok	s		4	3	0	0	Firmicutes_A	Clostridia	Lachnospirales	Lachnospiraceae	Anaerobutyricum	Anaerobutyricum hallii
BAC_42	BAC	BAC_b682_1	63.4	2599849	2	95.51	1.34	FALSE	ok	s		4	0	0	0	Firmicutes_A	Clostridia	Lachnospirales	Lachnospiraceae	Lachnospira	Lachnospira eligens_A
BAC_43	BAC	BAC_b28073	61.8	2516968	2	82.42	0	FALSE	ok	s	s->l	138	49	138	49	Firmicutes_A	Clostridia	Lachnospirales	Lachnospiraceae	Lachnospira	Lachnospira rogosae_A
BAC_44	BAC	BAC_b20582_1	61.1	2412942	0	95.51	0	FALSE	none	s		0	0	0	0	Firmicutes_A	Clostridia	Lachnospirales	Lachnospiraceae	Mediterraneibacter	Mediterraneibacter torques
BAC_45	BAC	BAC_b38396	60.2	2219733	0	97.21	1.15	FALSE	none	s		0	0	0	0	Actinobacteriota	Actinomycetia	Actinomycetales	Bifidobacteriaceae	Bifidobacterium	Bifidobacterium longum
BAC_46	BAC	BAC_b19410	57	2468938	0	92.92	0.17	FALSE	none	a		0	0	0	0	Firmicutes_A	Clostridia	Oscillospirales	Ruminococcaceae	CAG-115	CAG-115 sp003531585
BAC_47	BAC	BAC_b37093	53.6	2282016	0	70.81	0	FALSE	none			0	0	0	0	Firmicutes_A	Clostridia	Lachnospirales	Lachnospiraceae	Dorea	Dorea formicigenerans
BAC_48	BAC	BAC_b37224	51.3	2612080	0	95.47	0	FALSE	none	s		0	0	0	0	Firmicutes_A	Clostridia	Lachnospirales	Lachnospiraceae	Eubacterium_G	Eubacterium_G sp000435815
BAC_49	BAC	BAC_b32199_1	48.1	2944944	0	57.89	0	FALSE	none	s		0	0	0	0	Firmicutes_A	Clostridia	Lachnospirales	Lachnospiraceae	Blautia_A	Blautia_A sp900066145
BAC_50	BAC	BAC_b8084	47.8	1623763	0	79.9	3.91	FALSE	none	s		0	0	0	0	Firmicutes_A	Clostridia	TANB77	CAG-508	Merdicola	Merdicola sp900552655
BAC_51	BAC	BAC_b44122	46	1803256	0	99.71	0.2	FALSE	none	v		0	0	0	0	Actinobacteriota	Coriobacteriia	Coriobacteriales	QAMH01	QAMH01	QAMH01 sp900544245
BAC_52	BAC	BAC_b46216_1	45.9	2337950	0	86.77	4.29	FALSE	none			0	0	0	0	Firmicutes_A	Clostridia	Lachnospirales	Lachnospiraceae	CAG-317	CAG-317 sp000433215
BAC_53	BAC	BAC_b26441_1	45.8	2628168	0	97.43	2.57	FALSE	none	q		0	0	0	0	Firmicutes_A	Clostridia	Oscillospirales	Oscillospiraceae	Faecousia	Faecousia sp000435995
BAC_54	BAC	BAC_b8673	44.1	2626066	0	74.88	1.75	FALSE	none	s		0	0	0	0	Firmicutes_A	Clostridia	Lachnospirales	Lachnospiraceae	Oliverpabstia	Oliverpabstia intestinalis
BAC_55	BAC	BAC_b38125_1	43.4	2273832	3	84.59	2.97	FALSE	ok			2	1	0	0	Firmicutes_A	Clostridia	Oscillospirales	Oscillospiraceae	Lawsonibacter	Lawsonibacter asaccharolyticus
BAC_56	BAC	BAC_b26541	42.5	2449193	0	85.2	1.21	FALSE	none	s		0	0	0	0	Firmicutes_A	Clostridia	Christensenellales	CAG-74	Ventricola	Ventricola sp900542445
BAC_57	BAC	BAC_b2038_1	42.4	2957377	2	91.43	0.67	FALSE	ok	s		4	3	2	2	Firmicutes_A	Clostridia	Lachnospirales	Lachnospiraceae	Butyribacter	Butyribacter intestini
BAC_58	BAC	BAC_b2666_1	41.7	2970436	0	97.77	0.45	FALSE	none	s		0	0	0	0	Bacteroidota	Bacteroidia	Bacteroidales	Barnesiellaceae	Barnesiella	Barnesiella intestinihominis
BAC_59	BAC	BAC_b21803	40.4	1768995	0	99.93	0.12	FALSE	none	i		0	0	0	0	Actinobacteriota	Coriobacteriia	Coriobacteriales	Eggerthellaceae	CAG-1427	CAG-1427 sp000435675
BAC_60	BAC	BAC_b4222_1	40.1	3261853	0	74.88	1.75	FALSE	none	s		0	0	0	0	Firmicutes_A	Clostridia	Lachnospirales	Lachnospiraceae	Roseburia	Roseburia intestinalis
BAC_61	BAC	BAC_b14115	38.8	4426597	0	79.64	3.45	FALSE	none	l		0	0	0	0	Bacteroidota	Bacteroidia	Bacteroidales	Tannerellaceae	Parabacteroides	Parabacteroides distasonis
BAC_62	BAC	BAC_b39574	37.7	928072	0	50	0	FALSE	none			0	0	0	0	Actinobacteriota	Actinomycetia	Actinomycetales	Bifidobacteriaceae	Bifidobacterium	Bifidobacterium pseudocatenulatum
BAC_63	BAC	BAC_b25416_1	37	4515657	0	62.23	1.72	FALSE	none			0	0	0	0	Bacteroidota	Bacteroidia	Bacteroidales	Bacteroidaceae	Bacteroides	Bacteroides fragilis
BAC_64	BAC	BAC_b1670	35.1	2537001	0	97.66	0	FALSE	none	a		0	0	0	0	Proteobacteria	Gammaproteobacteria	Burkholderiales	Burkholderiaceae	Turicimonas	Turicimonas muris
BAC_65	BAC	BAC_b2768_1	33.6	2394848	2	61.06	1.75	FALSE	ok			1	2	1	2	Firmicutes_A	Clostridia	Lachnospirales	Lachnospiraceae	Blautia_A	Blautia_A obeum
BAC_66	BAC	BAC_b8135	32.8	2749957	0	74.19	0.88	FALSE	none	s		0	0	0	0	Firmicutes_A	Clostridia	Lachnospirales	Lachnospiraceae	Roseburia	Roseburia hominis
BAC_67	BAC	BAC_b39806	31.7	2150097	0	72.37	8.62	FALSE	none			0	0	0	0	Firmicutes_A	Clostridia	Oscillospirales	Oscillospiraceae	Dysosmobacter	Dysosmobacter sp000436875
BAC_68	BAC	BAC_b4086_1	30.6	2015747	0	51.88	1.72	FALSE	none			0	0	0	0	Firmicutes_A	Clostridia	Oscillospirales	Oscillospiraceae	Dysosmobacter	Dysosmobacter welbionis
BAC_69	BAC	BAC_b12311_1	30.1	2808401	0	85.31	2.36	FALSE	none			0	0	0	0	Firmicutes_A	Clostridia	Oscillospirales	Oscillospiraceae	Marseille-P3106	Marseille-P3106 sp900543935
BAC_70	BAC	BAC_b3244_1	26.7	2809084	0	71.47	1.72	FALSE	none			0	0	0	0	Firmicutes_A	Clostridia	Lachnospirales	Lachnospiraceae	Schaedlerella	Schaedlerella glycyrrhizinilytica_A
BAC_71	BAC	BAC_b12591_1	23.5	1536376	0	75.83	1.85	FALSE	none	s		0	0	0	0	Firmicutes_A	Clostridia	TANB77	CAG-508	CAG-245	CAG-245 sp000435175
BAC_72	BAC	BAC_b5197	22.6	2575813	0	79.6	2.63	FALSE	none	s		0	0	0	0	Firmicutes_A	Clostridia	Lachnospirales	Lachnospiraceae	Coprococcus_A	Coprococcus_A catus
BAC_73	BAC	BAC_b23957	22.4	4452549	0	75.17	0	FALSE	none	s		0	0	0	0	Bacteroidota	Bacteroidia	Bacteroidales	Tannerellaceae	Parabacteroides	Parabacteroides sp014287585
BAC_74	BAC	BAC_b44698	21.1	3244113	0	89.44	2.24	FALSE	none			0	0	0	0	Firmicutes_A	Clostridia	Lachnospirales	Lachnospiraceae	Blautia_A	Blautia_A hydrogenotrophica
BAC_75	BAC	BAC_b30097_1	20.3	1549097	0	60.34	0	FALSE	none			0	0	0	0	Firmicutes_A	Clostridia	Oscillospirales	Oscillospiraceae	Evtepia	Evtepia gabavorous
BAC_76	BAC	BAC_b24513_1	20.1	2616623	0	93.87	1.42	FALSE	none	s		0	0	0	0	Firmicutes	Bacilli	Erysipelotrichales	Coprobacillaceae	Faecalibacillus	Faecalibacillus intestinalis
BAC_77	BAC	BAC_b17662_1	19.8	4236338	0	94.58	4.77	FALSE	none	s		0	0	0	0	Bacteroidota	Bacteroidia	Bacteroidales	Marinifilaceae	Butyricimonas	Butyricimonas virosa
BAC_78	BAC	BAC_b33690_1	19.7	2260093	0	56.07	1.75	FALSE	none	s		0	0	0	0	Firmicutes_A	Clostridia	Lachnospirales	Lachnospiraceae	Ventrimonas	Ventrimonas sp003478505
BAC_79	BAC	BAC_b1161	18.9	1646793	0	62.07	0	FALSE	none			0	0	0	0	Firmicutes_A	Clostridia	Oscillospirales	Acutalibacteraceae	Acutalibacter	Acutalibacter ornithocaccae
BAC_80	BAC	BAC_b42616	18.1	2288207	0	95.01	0.63	FALSE	none	a		0	0	0	0	Proteobacteria	Gammaproteobacteria	Burkholderiales	Burkholderiaceae	Parasutterella	Parasutterella excrementihominis
BAC_81	BAC	BAC_b12602	17.6	2421418	0	53.45	0	FALSE	none	s		0	0	0	0	Firmicutes_A	Clostridia	Lachnospirales	Lachnospiraceae	Ruminococcus_B	Ruminococcus_B gnavus
BAC_82	BAC	BAC_b13393	17.3	1604950	0	87.93	1.08	FALSE	none	r		0	0	0	0	Proteobacteria	Alphaproteobacteria	RF32	CAG-239	Scatocola	Scatocola faecipullorum
BAC_83	BAC	BAC_b2179	16.3	2329906	0	50.88	0	FALSE	none	s		0	0	0	0	Firmicutes_A	Clostridia	Lachnospirales	Lachnospiraceae	Butyribacter	Butyribacter sp000436755
BAC_84	BAC	BAC_b114	15.8	2099841	0	58.97	0	FALSE	none			0	0	0	0	Firmicutes_A	Clostridia	Oscillospirales	Oscillospiraceae	CAG-170	CAG-170 sp900545925
BAC_85	BAC	BAC_b15222	15.7	3158157	0	77.59	1.34	FALSE	none	s		0	0	0	0	Bacteroidota	Bacteroidia	Bacteroidales	Marinifilaceae	Odoribacter	Odoribacter splanchnicus
BAC_86	BAC	BAC_b1473_1	15.5	2015890	0	58.27	4.39	FALSE	none	s		0	0	0	0	Firmicutes_A	Clostridia	Lachnospirales	Lachnospiraceae	Butyribacter	Butyribacter sp003529475
BAC_87	BAC	BAC_b15914	14	1641939	0	67.64	2.68	FALSE	none	a		0	0	0	0	Firmicutes_A	Clostridia	UBA1381	UBA1381	CAG-41	CAG-41 sp900066215
BAC_88	BAC	BAC_b26281	11.9	1268249	0	58.56	0.67	FALSE	none	a		0	0	0	0	Firmicutes_A	Clostridia	Oscillospirales	Acutalibacteraceae	JAGZMM01	JAGZMM01 sp018364155
BAD_1	BAD	BAD_b23553_1	834.4	1691287	0	60.1	1.9	TRUE	too_many	s		0	0	0	0	Firmicutes_A	Clostridia	Lachnospirales	Lachnospiraceae	Fusicatenibacter	Fusicatenibacter saccharivorans
BAD_2	BAD	BAD_b26817_1	827.9	2733747	6	94.69	2.73	TRUE	ok	s		181	68	0	0	Firmicutes_A	Clostridia	Lachnospirales	Lachnospiraceae	Agathobacter	Agathobacter faecis
BAD_3	BAD	BAD_b47786_1	652.9	3032444	2	98.3	0	TRUE	ok	s		1	1	0	0	Bacteroidota	Bacteroidia	Bacteroidales	Barnesiellaceae	Barnesiella	Barnesiella intestinihominis
BAD_4	BAD	BAD_b43719_1	633.2	4083209	0	77.07	0	TRUE	too_many	s		0	0	0	0	Bacteroidota	Bacteroidia	Bacteroidales	Bacteroidaceae	Bacteroides	Bacteroides uniformis
BAD_5	BAD	BAD_b30644_2	543.4	1149751	4	50.86	0	TRUE	ok			12	2	0	0	Firmicutes_A	Clostridia	Oscillospirales	Acutalibacteraceae	Ruminococcus_E	Ruminococcus_E bromii_B
BAD_6	BAD	BAD_b16661_1	386.6	4540563	3	95.31	2.35	TRUE	ok	s	s->f	268	203	0	0	Bacteroidota	Bacteroidia	Bacteroidales	Bacteroidaceae	Phocaeicola	Phocaeicola vulgatus
BAD_7	BAD	BAD_b9594_1	352.1	2125449	4	93.39	0.34	TRUE	ok	s		100	61	0	0	Firmicutes_A	Clostridia	Lachnospirales	Lachnospiraceae	Agathobacter	Agathobacter rectalis
BAD_8	BAD	BAD_b7739_1	294	2555932	3	97.26	0.68	TRUE	ok	a		28	4	0	0	Firmicutes_A	Clostridia	Oscillospirales	Ruminococcaceae	Ruminococcus_D	Ruminococcus_D bicirculans
BAD_9	BAD	BAD_b61696_1	290	2160846	0	89.08	3.06	TRUE	too_many			0	0	0	0	Firmicutes_A	Clostridia	Oscillospirales	Ruminococcaceae	Gemmiger	Gemmiger qucibialis
BAD_10	BAD	BAD_b66581_1	245.2	3120122	3	75.86	0	TRUE	ok			21	12	2	2	Bacteroidota	Bacteroidia	Bacteroidales	Bacteroidaceae	Bacteroides	Bacteroides stercoris
BAD_11	BAD	BAD_b35856_1	192.4	2935074	2	98.25	1.52	FALSE	ok	s		2	0	2	0	Firmicutes_A	Clostridia	Christensenellales	CAG-74	UBA11524	UBA11524 sp000437595
BAD_12	BAD	BAD_b12851_1	191.5	2021921	3	96.25	0	FALSE	ok	s		12	3	1	1	Firmicutes_A	Clostridia	Lachnospirales	Lachnospiraceae	Butyrivibrio_A	Butyrivibrio_A crossotus
BAD_13	BAD	BAD_b14263	188	2288716	4	96.9	7.97	TRUE	ok	s	s->i	9	2	6	1	Bacteroidota	Bacteroidia	Bacteroidales	Rikenellaceae	Alistipes	Alistipes putredinis
BAD_14	BAD	BAD_b8449	187.6	2856542	2	93.46	4.41	TRUE	ok			1	1	0	0	Bacteroidota	Bacteroidia	Bacteroidales	Rikenellaceae	Alistipes	Alistipes onderdonkii
BAD_15	BAD	BAD_b23356_1	177.9	2239733	3	90.32	1.11	FALSE	ok	f		65	42	0	0	Actinobacteriota	Actinomycetia	Actinomycetales	Bifidobacteriaceae	Bifidobacterium	Bifidobacterium longum
BAD_16	BAD	BAD_b28178	176.5	2067987	0	88.62	0.38	TRUE	none			0	0	0	0	Bacteroidota	Bacteroidia	Bacteroidales	Muribaculaceae	CAG-1031	CAG-1031 sp000431215
BAD_17	BAD	BAD_b39157	167.2	2093653	0	92.6	1.52	TRUE	none	a		0	0	0	0	Actinobacteriota	Actinomycetia	Actinomycetales	Bifidobacteriaceae	Bifidobacterium	Bifidobacterium bifidum
BAD_18	BAD	BAD_b32093_1	164.4	2320816	4	91.91	1.96	TRUE	ok			17	5	0	0	Firmicutes_A	Clostridia	Oscillospirales	Oscillospiraceae	Faecousia	Faecousia sp000434635
BAD_19	BAD	BAD_b33527	163.3	1846848	0	96.95	0.34	FALSE	none	a		0	0	0	0	Firmicutes_A	Clostridia	Oscillospirales	Acutalibacteraceae	Fimenecus	Fimenecus sp000432435
BAD_20	BAD	BAD_b44514_1	150.6	2579711	0	97.43	1.13	TRUE	none	s		0	0	0	0	Bacteroidota	Bacteroidia	Bacteroidales	Muribaculaceae	UBA7173	UBA7173 sp900545955
BAD_21	BAD	BAD_b50950	136.2	2776209	0	97.96	0	FALSE	none			0	0	0	0	Verrucomicrobiota	Verrucomicrobiae	Verrucomicrobiales	Akkermansiaceae	Akkermansia	Akkermansia muciniphila
BAD_22	BAD	BAD_b14040_1	131.5	2610298	2	95.61	0	TRUE	ok	a		5	2	0	0	Firmicutes_A	Clostridia	Oscillospirales	Ruminococcaceae	Ruminiclostridium_E	Ruminiclostridium_E siraeum
BAD_23	BAD	BAD_b10586_1	125.4	5968529	3	69.83	1.72	TRUE	ok	s		43	31	0	0	Bacteroidota	Bacteroidia	Bacteroidales	Bacteroidaceae	Bacteroides	Bacteroides ovatus
BAD_24	BAD	BAD_b4962_1	118.5	2452392	2	95.66	1.17	FALSE	ok	s		1	1	0	0	Firmicutes_A	Clostridia	Lachnospirales	Lachnospiraceae	Coprococcus	Coprococcus sp900066115
BAD_25	BAD	BAD_b62337_1	113.5	2827360	2	92.57	1.54	FALSE	ok			1	1	0	0	Firmicutes_A	Clostridia	Lachnospirales	Lachnospiraceae	Eubacterium_I	Eubacterium_I ramulus
BAD_26	BAD	BAD_b47797_1	113.1	1650248	2	83.58	4.03	FALSE	ok			5	1	0	0	Firmicutes_A	Clostridia	Oscillospirales	Oscillospiraceae	CAG-103	CAG-103 sp000432375
BAD_27	BAD	BAD_b43303_1	111.2	1822179	2	86.62	3.48	TRUE	ok	f		0	0	0	0	Actinobacteriota	Actinomycetia	Actinomycetales	Bifidobacteriaceae	Bifidobacterium	Bifidobacterium adolescentis
BAD_28	BAD	BAD_b21511_1	105.3	1938299	4	62.73	0	FALSE	ok			9	4	0	0	Firmicutes_A	Clostridia	Oscillospirales	Oscillospiraceae	CAG-83	CAG-83 sp900548615
BAD_29	BAD	BAD_b17981_1	103.1	2500846	4	78.45	7.89	FALSE	ok	s		26	14	2	2	Firmicutes_A	Clostridia	Lachnospirales	Lachnospiraceae	Dorea_A	Dorea_A longicatena
BAD_30	BAD	BAD_b44770_1	101.1	1618276	0	74.64	3.45	TRUE	none			0	0	0	0	Firmicutes_A	Clostridia	Oscillospirales	Oscillospiraceae	CAG-83	CAG-83 sp000435555
BAD_31	BAD	BAD_b39531_1	94.1	6458081	2	92.5	3.15	TRUE	ok			1	1	0	0	Bacteroidota	Bacteroidia	Bacteroidales	Bacteroidaceae	Bacteroides	Bacteroides cellulosilyticus
BAD_32	BAD	BAD_b35657	92.3	1347354	0	89.27	1.21	FALSE	too_many	v		0	0	0	0	Actinobacteriota	Coriobacteriia	Coriobacteriales	QAMH01	QAMH01	QAMH01 sp900544245
BAD_33	BAD	BAD_b5455_1	90.4	2867994	3	89.27	2.64	FALSE	ok	s		70	30	3	2	Firmicutes_A	Clostridia	Lachnospirales	Lachnospiraceae	Anaerobutyricum	Anaerobutyricum soehngenii
BAD_34	BAD	BAD_b19321_1	85.4	3922670	2	95.52	2.05	TRUE	ok	s	s->l	1	1	1	1	Bacteroidota	Bacteroidia	Bacteroidales	Tannerellaceae	Parabacteroides	Parabacteroides merdae
BAD_35	BAD	BAD_b1859_1	85.3	2165426	0	97.15	0.67	FALSE	none	a		0	0	0	0	Firmicutes_A	Clostridia	Oscillospirales	Acutalibacteraceae	UBA1417	UBA1417 sp003531055
BAD_36	BAD	BAD_b435_1	82.6	1117944	3	50.16	0	FALSE	ok	a		15	16	4	4	Firmicutes_A	Clostridia	Oscillospirales	Oscillospiraceae	ER4	ER4 sp000765235
BAD_37	BAD	BAD_b7157	77.9	1762010	0	94.81	0.34	FALSE	none	a		0	0	0	0	Firmicutes_A	Clostridia	Oscillospirales	Acutalibacteraceae	CAG-217	CAG-217 sp000436335
BAD_38	BAD	BAD_b23559_1	67.5	2540715	2	79.44	1.75	FALSE	ok	l		1	1	0	0	Firmicutes_A	Clostridia	Lachnospirales	Lachnospiraceae	Lachnospira	Lachnospira rogosae_A
BAD_39	BAD	BAD_b41628_1	67.3	1817449	2	84.26	2.07	FALSE	ok	a		1	1	1	1	Firmicutes_A	Clostridia	Oscillospirales	Ruminococcaceae	Angelakisella	Angelakisella sp900547385
BAD_40	BAD	BAD_b45071_1	65	3505600	2	94.3	4.75	FALSE	ok	s		1	1	0	0	Firmicutes_A	Clostridia	Lachnospirales	Lachnospiraceae	KLE1615	KLE1615 sp900066985
BAD_41	BAD	BAD_b11799_2	64.5	2307482	3	58.37	1.75	FALSE	ok			6	6	1	1	Firmicutes_A	Clostridia	Lachnospirales	Lachnospiraceae	Acetatifactor	Acetatifactor sp900066565
BAD_42	BAD	BAD_b4107_1	63.2	1679545	0	58.17	1.72	FALSE	none			0	0	0	0	Firmicutes_A	Clostridia	Lachnospirales	Lachnospiraceae	Mediterraneibacter	Mediterraneibacter faecis
BAD_43	BAD	BAD_b56528_1	62.1	2630307	0	64.35	1.75	FALSE	none	s		0	0	0	0	Firmicutes_A	Clostridia	Lachnospirales	Lachnospiraceae	Agathobacter	Agathobacter sp000434275
BAD_44	BAD	BAD_b46843	59.9	2673351	0	92.81	0.17	FALSE	none	r		0	0	0	0	Firmicutes_A	Clostridia	Lachnospirales	Lachnospiraceae	Coprococcus	Coprococcus eutactus
BAD_45	BAD	BAD_b28244_1	59.5	2899782	3	92.33	4.59	FALSE	ok	s		2	2	0	0	Firmicutes_A	Clostridia	Lachnospirales	Lachnospiraceae	Marvinbryantia	Marvinbryantia sp014385005
BAD_46	BAD	BAD_b1900_1	57.8	2872766	2	84.63	4.38	FALSE	ok			2	2	0	0	Firmicutes_A	Clostridia	Oscillospirales	Oscillospiraceae	CAG-170	CAG-170 sp000432135
BAD_47	BAD	BAD_b2499_1	57.4	1588660	0	64.24	1.72	FALSE	none			0	0	0	0	Firmicutes_A	Clostridia	Oscillospirales	Oscillospiraceae	CAG-83	CAG-83 sp000435975
BAD_48	BAD	BAD_b59923_1	55.4	2759111	0	94.85	1.01	FALSE	none	s		0	0	0	0	Firmicutes_A	Clostridia	Lachnospirales	Lachnospiraceae	Eubacterium_F	Eubacterium_F sp003491505
BAD_49	BAD	BAD_b8437	55.3	1465657	0	93.75	0.81	FALSE	none	s		0	0	0	0	Firmicutes_A	Clostridia	Christensenellales	CAG-314	CAG-314	CAG-314 sp000437915
BAD_50	BAD	BAD_b35133_1	52.5	2761485	0	63.32	0	FALSE	none	s		0	0	0	0	Firmicutes_A	Clostridia	Lachnospirales	Lachnospiraceae	Roseburia	Roseburia inulinivorans
BAD_51	BAD	BAD_b2852	49.7	1803311	0	94.62	0.16	FALSE	none	r		0	0	0	0	Proteobacteria	Alphaproteobacteria	RF32	CAG-239	Scatocola	Scatocola faecipullorum
BAD_52	BAD	BAD_b4369_1	49.4	2675034	0	88.61	1.48	FALSE	none			0	0	0	0	Firmicutes_A	Clostridia	Lachnospirales	Lachnospiraceae	Eisenbergiella	Eisenbergiella sp900066775
BAD_53	BAD	BAD_b65075_1	48.1	2468019	0	95.35	0.67	FALSE	none	a		0	0	0	0	Firmicutes_A	Clostridia	Oscillospirales	Butyricicoccaceae	Agathobaculum	Agathobaculum butyriciproducens
BAD_54	BAD	BAD_b42152_1	47	2262396	0	71.25	1.75	FALSE	none	s		0	0	0	0	Firmicutes_A	Clostridia	Lachnospirales	Lachnospiraceae	Bariatricus	Bariatricus comes
BAD_55	BAD	BAD_b61318_1	47	2300126	0	83	2.4	FALSE	none	l		0	0	0	0	Bacteroidota	Bacteroidia	Bacteroidales	Rikenellaceae	Alistipes	Alistipes communis
BAD_56	BAD	BAD_b23521_1	46.5	1335796	0	91.19	1.12	FALSE	none	s		0	0	0	0	Firmicutes	Bacilli	RF39	UBA660	UBA6448	UBA6448 sp000437315
BAD_57	BAD	BAD_b37249_1	43.9	3106089	0	94.69	2.04	FALSE	none	s		0	0	0	0	Firmicutes_A	Clostridia	Lachnospirales	Lachnospiraceae	Butyribacter	Butyribacter intestini
BAD_58	BAD	BAD_b2847_1	42.2	2483649	3	86.14	4.96	FALSE	ok	s		2	1	0	0	Firmicutes_A	Clostridia	Lachnospirales	Lachnospiraceae	Lachnospira	Lachnospira eligens_A
BAD_59	BAD	BAD_b20926_1	41.2	1762208	0	72.29	1.34	FALSE	none			0	0	0	0	Firmicutes_A	Clostridia	Lachnospirales	Lachnospiraceae	Anaerostipes	Anaerostipes hadrus
BAD_60	BAD	BAD_b6108	41.2	2112582	0	88.37	4.11	FALSE	none			0	0	0	0	Firmicutes_A	Clostridia	Lachnospirales	Lachnospiraceae	UBA11774	UBA11774 sp003507655
BAD_61	BAD	BAD_b22187_1	40.6	767193	0	65.52	0	FALSE	none			0	0	0	0	Firmicutes_C	Negativicutes	Veillonellales	Dialisteraceae	Dialister	Dialister invisus
BAD_62	BAD	BAD_b39477	40.1	3237814	0	94.47	2.64	FALSE	none	s		0	0	0	0	Bacteroidota	Bacteroidia	Bacteroidales	Muribaculaceae	CAG-485	CAG-485 sp900760735
BAD_63	BAD	BAD_b19358_1	39.8	2184474	0	82.33	3.71	FALSE	none	a		0	0	0	0	Firmicutes_A	Clostridia	Oscillospirales	Oscillospiraceae	UBA738	UBA738 sp003522945
BAD_64	BAD	BAD_b2396	39.8	1174527	0	91.57	1.69	FALSE	none	t		0	0	0	0	Firmicutes	Bacilli	RF39	UBA660	CAG-628	CAG-628 sp003524085
BAD_65	BAD	BAD_b12960_1	38.6	2604201	0	93.87	1.68	FALSE	none	l		0	0	0	0	Firmicutes_A	Clostridia	Lachnospirales	Lachnospiraceae	Eubacterium_G	Eubacterium_G sp000435815
BAD_66	BAD	BAD_b4865	36.1	1816387	0	99.12	1.73	FALSE	none	y		0	0	0	0	Actinobacteriota	Coriobacteriia	Coriobacteriales	Eggerthellaceae	CAG-1427	CAG-1427 sp000436075
BAD_67	BAD	BAD_b9314	35.8	2215824	0	97.12	1.21	FALSE	none	s		0	0	0	0	Actinobacteriota	Coriobacteriia	Coriobacteriales	Coriobacteriaceae	Collinsella	Collinsella sp.
BAD_68	BAD	BAD_b18988_1	35.4	2343473	0	98.24	2.97	FALSE	none	s		0	0	0	0	Actinobacteriota	Coriobacteriia	Coriobacteriales	Atopobiaceae	Thermophilibacter	Thermophilibacter sp012027725
BAD_69	BAD	BAD_b50249_1	35.2	2775651	0	67.34	1.75	FALSE	none	s		0	0	0	0	Firmicutes_A	Clostridia	Lachnospirales	Lachnospiraceae	Blautia_A	Blautia_A sp900066505
BAD_70	BAD	BAD_b24589_1	34.1	1910677	0	98.99	1.08	FALSE	none	s		0	0	0	0	Firmicutes_A	Clostridia	Christensenellales	CAG-138	SFEL01	SFEL01 sp004557245
BAD_71	BAD	BAD_b6240	33.8	1603797	0	85.73	0.34	FALSE	none	a		0	0	0	0	Firmicutes_A	Clostridia	Oscillospirales	Oscillospiraceae	F23-B02	F23-B02 sp004556755
BAD_72	BAD	BAD_b56286_1	33.7	2798721	0	56.14	1.75	FALSE	none			0	0	0	0	Firmicutes_A	Clostridia	Lachnospirales	Lachnospiraceae	Blautia_A	Blautia_A sp900066145
BAD_73	BAD	BAD_b11377_1	33.5	2036615	0	96.08	0.1	FALSE	none			0	0	0	0	Bacteroidota	Bacteroidia	Bacteroidales	Rikenellaceae	Tidjanibacter	Tidjanibacter inops_A
BAD_74	BAD	BAD_b5848_1	32.6	2406960	0	82.46	2.68	FALSE	none			0	0	0	0	Firmicutes_A	Clostridia	Oscillospirales	Oscillospiraceae	Lawsonibacter	Lawsonibacter asaccharolyticus
BAD_75	BAD	BAD_b30684_1	32.2	2553264	0	86.39	3.8	FALSE	none			0	0	0	0	Firmicutes_A	Clostridia	Lachnospirales	Lachnospiraceae	Copromonas	Copromonas sp900066535
BAD_76	BAD	BAD_b20980_1	31.8	2745775	0	95.46	1.03	FALSE	none	a		0	0	0	0	Firmicutes_A	Clostridia	Oscillospirales	Ruminococcaceae	CAG-115	CAG-115 sp003531585
BAD_77	BAD	BAD_b27853_1	31.7	3134919	0	60.85	0	FALSE	none	s		0	0	0	0	Firmicutes_A	Clostridia	Lachnospirales	Lachnospiraceae	Roseburia	Roseburia intestinalis
BAD_78	BAD	BAD_b14631_1	29.5	3002542	2	89.03	0.89	FALSE	ok	s		4	2	0	0	Firmicutes_A	Clostridia	Lachnospirales	Lachnospiraceae	CAG-882	CAG-882 sp003486385
BAD_79	BAD	BAD_b14371_1	29.3	2489804	0	61.85	1.75	FALSE	none			0	0	0	0	Firmicutes_A	Clostridia	Lachnospirales	Lachnospiraceae	Oliverpabstia	Oliverpabstia intestinalis
BAD_80	BAD	BAD_b28567	28.5	1001352	0	68.77	1.23	FALSE	none			0	0	0	0	Firmicutes_A	Clostridia	TANB77	CAG-508	CAG-273	CAG-273 sp003534295
BAD_81	BAD	BAD_b29072	28.4	2818928	0	71.05	1.75	FALSE	none	s		0	0	0	0	Firmicutes_A	Clostridia	Lachnospirales	Lachnospiraceae	Roseburia	Roseburia hominis
BAD_82	BAD	BAD_b27630_1	28.3	2045717	0	55.26	0	FALSE	none			0	0	0	0	Firmicutes_A	Clostridia	Lachnospirales	Lachnospiraceae	Blautia_A	Blautia_A obeum
BAD_83	BAD	BAD_b35577_1	28.3	2432365	0	83.4	2.6	FALSE	none			0	0	0	0	Firmicutes_A	Clostridia	Lachnospirales	Lachnospiraceae	Ruminococcus_B	Ruminococcus_B gnavus
BAD_84	BAD	BAD_b2109_1	27.8	1423579	0	58.78	6.03	FALSE	none			0	0	0	0	Firmicutes_A	Clostridia	Oscillospirales	Oscillospiraceae	ER4	ER4 sp900317525
BAD_85	BAD	BAD_b26399_1	27.8	1466000	0	58.33	0	FALSE	none			0	0	0	0	Firmicutes_A	Clostridia	Oscillospirales	Oscillospiraceae	CAG-83	CAG-83 sp000431575
BAD_86	BAD	BAD_b5431_1	27.3	2565955	0	97.9	0	FALSE	none	a		0	0	0	0	Proteobacteria	Gammaproteobacteria	Burkholderiales	Burkholderiaceae	Parasutterella	Parasutterella excrementihominis
BAD_87	BAD	BAD_b4880_1	27.2	2238082	0	50.88	0	FALSE	none			0	0	0	0	Firmicutes_A	Clostridia	Lachnospirales	Lachnospiraceae	Anaerostipes	Anaerostipes hadrus_A
BAD_88	BAD	BAD_b29726_1	27.1	2508391	0	88.47	1.68	FALSE	none			0	0	0	0	Firmicutes_A	Clostridia	Oscillospirales	Acutalibacteraceae	Acutalibacter	Acutalibacter ornithocaccae
BAD_89	BAD	BAD_b15731	26.7	1474123	0	72.33	5.05	FALSE	none	s		0	0	0	0	Firmicutes_A	Clostridia	TANB77	CAG-508	CAG-245	CAG-245 sp000435175
BAD_90	BAD	BAD_b22305_1	26.5	2248134	0	74.51	5.26	FALSE	none			0	0	0	0	Firmicutes_A	Clostridia	Lachnospirales	Lachnospiraceae	Dorea	Dorea formicigenerans
BAD_91	BAD	BAD_b15777	26	1636581	0	61.4	2.82	FALSE	none	l		0	0	0	0	Actinobacteriota	Coriobacteriia	Coriobacteriales	Eggerthellaceae	Adlercreutzia	Adlercreutzia celatus_A
BAD_92	BAD	BAD_b28777_1	25.8	2399340	0	90.93	0	FALSE	none	l		0	0	0	0	Firmicutes_A	Clostridia	Lachnospirales	Lachnospiraceae	Butyribacter	Butyribacter sp003529475
BAD_93	BAD	BAD_b65691_1	24.6	2587272	0	83.1	5.17	FALSE	none	s		0	0	0	0	Firmicutes_A	Clostridia	Peptostreptococcales	Peptostreptococcaceae	Romboutsia	Romboutsia timonensis
BAD_94	BAD	BAD_b8566_1	24.1	1733679	0	50.68	1.79	FALSE	none			0	0	0	0	Firmicutes_A	Clostridia	Oscillospirales	Ruminococcaceae	SFJ001	SFJ001 sp004555865
BAD_95	BAD	BAD_b37643	23.9	2014834	2	88.75	0.69	FALSE	ok	a		1	1	1	1	Firmicutes_A	Clostridia	Oscillospirales	Ruminococcaceae	Ruminococcus_C	Ruminococcus_C sp000437175
BAD_96	BAD	BAD_b4868_1	23.6	1726784	0	56.03	3.45	FALSE	none			0	0	0	0	Firmicutes_A	Clostridia	Oscillospirales	Oscillospiraceae	Dysosmobacter	Dysosmobacter sp000436875
BAD_97	BAD	BAD_b37242_1	22.8	1948901	0	82.48	0.67	FALSE	none	a		0	0	0	0	Firmicutes_A	Clostridia	Oscillospirales	Ruminococcaceae	Ruminococcus_C	Ruminococcus_C callidus
BAD_98	BAD	BAD_b8703_1	22.5	1271229	0	66.75	6.35	FALSE	none	s		0	0	0	0	Firmicutes_A	Clostridia	TANB77	CAG-508	Merdicola	Merdicola sp001915925
BAD_99	BAD	BAD_b54234_1	22.4	2571904	0	90.51	8.39	FALSE	none			0	0	0	0	Firmicutes_A	Clostridia	Oscillospirales	Oscillospiraceae	Faecousia	Faecousia sp000435995
BAD_100	BAD	BAD_b16143_1	21.1	1897722	0	83.11	5.11	FALSE	none			0	0	0	0	Firmicutes_A	Clostridia	Oscillospirales	Oscillospiraceae	Onthomonas	Onthomonas sp900545815
BAD_101	BAD	BAD_b45478_1	19.9	2788199	0	58.77	0	FALSE	none	s		0	0	0	0	Firmicutes_A	Clostridia	Lachnospirales	Lachnospiraceae	Limivivens	Limivivens sp900543575
BAD_102	BAD	BAD_b10577	19.2	1704069	0	93.92	1.64	FALSE	none	t		0	0	0	0	Firmicutes_A	Clostridia	Christensenellales	CAG-138	PeH17	PeH17 sp000435055
BAD_103	BAD	BAD_b695	18.7	4365951	0	69.31	2.59	FALSE	none	s		0	0	0	0	Bacteroidota	Bacteroidia	Bacteroidales	Tannerellaceae	Parabacteroides	Parabacteroides distasonis
BAD_104	BAD	BAD_b11868_1	18.6	2098801	0	69.09	1.75	FALSE	none			0	0	0	0	Firmicutes_A	Clostridia	Lachnospirales	Lachnospiraceae	AM51-8	AM51-8 sp003478275
BAD_105	BAD	BAD_b34400_1	18.5	2246698	0	60.88	1.75	FALSE	none	s		0	0	0	0	Firmicutes_A	Clostridia	Lachnospirales	Lachnospiraceae	UMGS1375	UMGS1375 sp900066615
BAD_106	BAD	BAD_b32486_1	18.1	1817901	0	84.23	1.34	FALSE	none	a		0	0	0	0	Firmicutes_A	Clostridia	Oscillospirales	Ruminococcaceae	Ruminococcus_C	Ruminococcus_C sp000437255
BAD_107	BAD	BAD_b59606_1	17.8	2517104	0	90.54	2.85	FALSE	none	a		0	0	0	0	Firmicutes_A	Clostridia	UBA1381	UBA1381	CAG-41	CAG-41 sp900066215
BAD_108	BAD	BAD_b27399_1	17.2	2146497	0	77.61	4.75	FALSE	none	s		0	0	0	0	Firmicutes_A	Clostridia	Christensenellales	CAG-74	SFMI01	SFMI01 sp004556155
BAD_109	BAD	BAD_b10867_1	16.8	2501735	0	80.6	1.57	FALSE	none	s		0	0	0	0	Bacteroidota	Bacteroidia	Bacteroidales	Muribaculaceae	CAG-485	CAG-485 sp910583775
BAD_110	BAD	BAD_b19501_1	16.6	3541690	0	88.11	4.12	FALSE	none	s		0	0	0	0	Bacteroidota	Bacteroidia	Bacteroidales	Marinifilaceae	Odoribacter	Odoribacter splanchnicus
BAD_111	BAD	BAD_b24999_1	16.6	2002361	0	88.36	2.01	FALSE	none	a		0	0	0	0	Firmicutes_A	Clostridia	Oscillospirales	Ruminococcaceae	Ruminococcus	Ruminococcus sp002438605
BAD_112	BAD	BAD_b23316_1	16	2275931	0	60.52	6.36	FALSE	none			0	0	0	0	Firmicutes_A	Clostridia	Christensenellales	CAG-74	Ventricola	Ventricola sp900542445
BAD_113	BAD	BAD_b67848_1	16	2215526	0	56.62	1.75	FALSE	none			0	0	0	0	Firmicutes_A	Clostridia	Lachnospirales	Lachnospiraceae	RUG115	RUG115 sp900066395
BAD_114	BAD	BAD_b22358_1	15.5	1727840	0	82.88	2.85	FALSE	none	a		0	0	0	0	Firmicutes_A	Clostridia	Oscillospirales	Ruminococcaceae	Negativibacillus	Negativibacillus sp000435195
BAD_115	BAD	BAD_b29425_1	15.2	1721529	0	63.9	9.96	FALSE	none	a		0	0	0	0	Firmicutes_A	Clostridia	TANB77	CAG-508	CAG-269	CAG-269 sp000431335
BAD_116	BAD	BAD_b32639_1	14.9	1595492	0	56.36	0.86	FALSE	none	s		0	0	0	0	Firmicutes_A	Clostridia	Oscillospirales	Oscillospiraceae	Evtepia	Evtepia gabavorous
BAD_117	BAD	BAD_b48287_1	14.7	2595954	0	87.86	9.21	FALSE	none	s		0	0	0	0	Firmicutes	Bacilli	Erysipelotrichales	Coprobacillaceae	Faecalibacillus	Faecalibacillus intestinalis
BAD_118	BAD	BAD_b21808_1	14.1	1941235	0	52.79	3.51	FALSE	none			0	0	0	0	Firmicutes_A	Clostridia	Lachnospirales	Lachnospiraceae	CAG-45	CAG-45 sp000438375
BAD_119	BAD	BAD_b11401_1	13.1	999788	0	73.79	1.69	FALSE	none	s		0	0	0	0	Firmicutes	Bacilli	RF39	UBA660	CAG-302	CAG-302 sp000431795
BAD_120	BAD	BAD_b12035	12.9	2073778	0	79.67	1.41	FALSE	none	a		0	0	0	0	Proteobacteria	Gammaproteobacteria	Burkholderiales	Burkholderiaceae	Turicimonas	Turicimonas muris
BAD_121	BAD	BAD_b22_1	12.9	1508877	0	77.97	1.23	FALSE	none	a		0	0	0	0	Firmicutes_A	Clostridia	Oscillospirales	CAG-272	UBA11512	UBA11512 sp003522145
BAD_122	BAD	BAD_b70863	12.3	1445764	0	52.76	1.72	FALSE	none	a		0	0	0	0	Firmicutes_A	Clostridia	Oscillospirales	Acutalibacteraceae	Anaeromassilibacillus	Anaeromassilibacillus stercoravium
BAD_123	BAD	BAD_b50353	12.2	1208587	0	58.86	0.73	FALSE	none	s		0	0	0	0	Firmicutes_A	Clostridia	Oscillospirales	CAG-272	UMGS1865	UMGS1865 sp.
BAD_124	BAD	BAD_b52490	12.1	1092410	0	57.31	0	FALSE	none			0	0	0	0	Firmicutes_A	Clostridia	Christensenellales	CAG-552	UMGS1795	UMGS1795 sp900553555
BAD_125	BAD	BAD_b16849_1	11.1	2809597	0	51.5	0.86	FALSE	none			0	0	0	0	Bacteroidota	Bacteroidia	Bacteroidales	Marinifilaceae	Butyricimonas	Butyricimonas virosa
BAD_126	BAD	BAD_b2381_1	11.1	1574809	0	52.3	0	FALSE	none			0	0	0	0	Firmicutes_A	Clostridia	Lachnospirales	Lachnospiraceae	V9D3004	V9D3004 sp900760345
BAD_127	BAD	BAD_b2904	10.9	801174	0	67.85	7.24	FALSE	none	s		0	0	0	0	Firmicutes	Bacilli	RF39	UBA660	Onthousia	Onthousia sp000438295
BAD_128	BAD	BAD_b23500	10.1	596827	0	60.89	1.72	FALSE	none	s		0	0	0	0	Firmicutes_A	Clostridia	Christensenellales	UBA1242	CAJKWP01	CAJKWP01 sp905203645
BAE_1	BAE	BAE_b10502_1	1582.8	3130607	0	77.21	0.65	TRUE	too_many			0	0	0	0	Bacteroidota	Bacteroidia	Bacteroidales	Bacteroidaceae	Bacteroides	Bacteroides xylanisolvens
BAE_2	BAE	BAE_b2168_1	1422.5	2540995	5	95.46	0.29	TRUE	ok	s		457	141	54	31	Firmicutes_A	Clostridia	Lachnospirales	Lachnospiraceae	Ruminococcus_B	Ruminococcus_B gnavus
BAE_3	BAE	BAE_b17647_1	761.3	4240940	3	97.19	0.38	TRUE	ok	s		47	9	9	3	Bacteroidota	Bacteroidia	Bacteroidales	Tannerellaceae	Parabacteroides	Parabacteroides johnsonii
BAE_4	BAE	BAE_b9809_1	710	2633528	0	68.37	0	TRUE	too_many	s		0	0	0	0	Firmicutes_A	Clostridia	Lachnospirales	Lachnospiraceae	Blautia_A	Blautia_A wexlerae
BAE_5	BAE	BAE_b14384_1	565.1	2211911	5	97.54	0.74	TRUE	ok	s		150	36	1	1	Firmicutes_A	Clostridia	Lachnospirales	Lachnospiraceae	Agathobacter	Agathobacter rectalis
BAE_6	BAE	BAE_b21216_1	552.2	3063523	6	71.71	0	TRUE	ok			86	36	0	0	Bacteroidota	Bacteroidia	Bacteroidales	Bacteroidaceae	Bacteroides	Bacteroides stercoris
BAE_7	BAE	BAE_b22445	382.5	2610059	0	97.65	2.68	TRUE	too_many			0	0	0	0	Firmicutes_A	Clostridia	Lachnospirales	Lachnospiraceae	Anaerostipes	Anaerostipes hadrus
BAE_8	BAE	BAE_b17029_1	251.3	4167203	2	74.29	1.72	FALSE	ok			0	0	0	0	Bacteroidota	Bacteroidia	Bacteroidales	Bacteroidaceae	Bacteroides	Bacteroides uniformis
BAE_9	BAE	BAE_b12004_1	189.6	4351787	2	66.18	0	TRUE	ok			3	4	1	1	Bacteroidota	Bacteroidia	Bacteroidales	Bacteroidaceae	Bacteroides	Bacteroides fragilis
BAE_10	BAE	BAE_b19505	177.2	2665362	2	91.29	2.22	FALSE	ok	s		2	2	0	0	Firmicutes_A	Clostridia	Lachnospirales	Lachnospiraceae	Fusicatenibacter	Fusicatenibacter saccharivorans
BAE_11	BAE	BAE_b21601	172	5778335	2	72.05	1.72	TRUE	ok			1	1	1	1	Bacteroidota	Bacteroidia	Bacteroidales	Bacteroidaceae	Bacteroides	Bacteroides intestinalis_A
BAE_12	BAE	BAE_b25419_1	161.2	5515454	0	80.18	1.75	FALSE	too_many	s		0	0	0	0	Firmicutes_A	Clostridia	Lachnospirales	Lachnospiraceae	Enterocloster	Enterocloster bolteae
BAE_13	BAE	BAE_b6822	159.2	2147832	3	72.11	5.36	TRUE	ok	a		33	10	23	8	Firmicutes_A	Clostridia	Oscillospirales	Ruminococcaceae	Faecalibacterium	Faecalibacterium sp003449675
BAE_14	BAE	BAE_b10571_1	141.1	2168275	0	97.92	1.6	FALSE	none	s		0	0	0	0	Bacteroidota	Bacteroidia	Bacteroidales	Rikenellaceae	Alistipes	Alistipes putredinis
BAE_15	BAE	BAE_b12066_1	113.3	4912817	0	93.77	0.69	FALSE	none	s		0	0	0	0	Bacteroidota	Bacteroidia	Bacteroidales	Bacteroidaceae	Phocaeicola	Phocaeicola dorei
BAE_16	BAE	BAE_b5655_1	111.7	2690959	0	96.58	0.52	FALSE	none	s		0	0	0	0	Firmicutes_A	Clostridia	Lachnospirales	Lachnospiraceae	Lachnospira	Lachnospira eligens_A
BAE_17	BAE	BAE_b10055_1	104.3	2461353	3	69.57	1.75	FALSE	ok			37	21	4	4	Firmicutes_A	Clostridia	Lachnospirales	Lachnospiraceae	Eubacterium_I	Eubacterium_I ramulus
BAE_18	BAE	BAE_b25694_1	99.4	2978457	0	73.02	1.75	FALSE	none	s		0	0	0	0	Firmicutes_A	Clostridia	Lachnospirales	Lachnospiraceae	Blautia_A	Blautia_A sp900066335
BAE_19	BAE	BAE_b15666	91.2	1868667	0	95.61	0.34	FALSE	none	a		0	0	0	0	Firmicutes_A	Clostridia	Oscillospirales	Acutalibacteraceae	Fimenecus	Fimenecus sp000432435
BAE_20	BAE	BAE_b24731	85	2726934	0	97.96	0	FALSE	none			0	0	0	0	Verrucomicrobiota	Verrucomicrobiae	Verrucomicrobiales	Akkermansiaceae	Akkermansia	Akkermansia muciniphila
BAE_21	BAE	BAE_b6772_1	78.5	2032939	0	97.32	0.34	FALSE	none	a		0	0	0	0	Firmicutes_A	Clostridia	Oscillospirales	Acutalibacteraceae	Ruminococcus_E	Ruminococcus_E sp003526955
BAE_22	BAE	BAE_b22117	73.9	2088212	0	100	1.61	FALSE	none	s		0	0	0	0	Actinobacteriota	Coriobacteriia	Coriobacteriales	Coriobacteriaceae	Collinsella	Collinsella sp.
BAE_23	BAE	BAE_b6462	72.6	1765060	2	63.91	4.46	FALSE	ok			11	4	4	1	Firmicutes_A	Clostridia	Oscillospirales	Ruminococcaceae	Faecalibacterium	Faecalibacterium sp900758465
BAE_24	BAE	BAE_b29905	66.5	2712705	0	81.22	2.59	FALSE	none	s		0	0	0	0	Firmicutes_A	Clostridia	Lachnospirales	Lachnospiraceae	Agathobacter	Agathobacter faecis
BAE_25	BAE	BAE_b37092	64.7	2548778	0	98.63	0.4	FALSE	none	a		0	0	0	0	Firmicutes_A	Clostridia	Oscillospirales	Ruminococcaceae	Ruminococcus_D	Ruminococcus_D bicirculans
BAE_26	BAE	BAE_b477	62.8	1650356	0	84.51	1.8	FALSE	none	i		0	0	0	0	Firmicutes_C	Negativicutes	Acidaminococcales	Acidaminococcaceae	Phascolarctobacterium	Phascolarctobacterium faecium
BAE_27	BAE	BAE_b22836	62.4	2030485	0	79.46	0	FALSE	none	s		0	0	0	0	Firmicutes_A	Clostridia	Lachnospirales	Lachnospiraceae	Faecalimonas	Faecalimonas sp000209385
BAE_28	BAE	BAE_b39941	57.9	5535047	2	66.12	1.75	FALSE	ok	s		12	5	0	0	Firmicutes_A	Clostridia	Lachnospirales	Lachnospiraceae	Enterocloster	Enterocloster aldenensis
BAE_29	BAE	BAE_b11105_1	52.5	2271301	0	89.37	1.46	FALSE	none	s		0	0	0	0	Firmicutes_A	Clostridia	Lachnospirales	Lachnospiraceae	Mediterraneibacter	Mediterraneibacter torques
BAE_30	BAE	BAE_b10805	52	2164831	0	96.38	0.65	FALSE	none	s		0	0	0	0	Actinobacteriota	Actinomycetia	Actinomycetales	Bifidobacteriaceae	Bifidobacterium	Bifidobacterium longum
BAE_31	BAE	BAE_b16588_1	50.3	3043499	0	87.25	1.05	FALSE	none			0	0	0	0	Firmicutes_A	Clostridia	Lachnospirales	Lachnospiraceae	Roseburia	Roseburia inulinivorans
BAE_32	BAE	BAE_b25464_1	48.5	2950229	0	75.5	1.72	FALSE	none			0	0	0	0	Bacteroidota	Bacteroidia	Bacteroidales	Bacteroidaceae	Phocaeicola	Phocaeicola sp900542985
BAE_33	BAE	BAE_b1541	44.8	2132902	0	89.38	0.67	FALSE	none	a		0	0	0	0	Firmicutes_A	Clostridia	Oscillospirales	Ruminococcaceae	Ruminococcus_C	Ruminococcus_C callidus
BAE_34	BAE	BAE_b33054	43.2	4479232	0	72.05	0	FALSE	none	s		0	0	0	0	Bacteroidota	Bacteroidia	Bacteroidales	Tannerellaceae	Parabacteroides	Parabacteroides distasonis
BAE_35	BAE	BAE_b22217_1	41.1	2138585	0	67.85	6.03	FALSE	none			0	0	0	0	Firmicutes_A	Clostridia	Lachnospirales	Lachnospiraceae	Mediterraneibacter	Mediterraneibacter faecis
BAE_36	BAE	BAE_b43225	40.8	5986997	0	53.45	0	FALSE	none	l		0	0	0	0	Bacteroidota	Bacteroidia	Bacteroidales	Tannerellaceae	Parabacteroides	Parabacteroides goldsteinii
BAE_37	BAE	BAE_b88_1	39.7	2693444	0	95.15	0	FALSE	none	s		0	0	0	0	Firmicutes_A	Clostridia	Lachnospirales	Lachnospiraceae	CAG-127	CAG-127 sp900319515
BAE_38	BAE	BAE_b15623_1	38.8	2659091	0	98.54	1.26	FALSE	none	s		0	0	0	0	Firmicutes	Bacilli	Erysipelotrichales	Coprobacillaceae	Faecalibacillus	Faecalibacillus intestinalis
BAE_39	BAE	BAE_b11828	36.3	2245857	0	86.61	0	FALSE	none			0	0	0	0	Firmicutes_A	Clostridia	Oscillospirales	Ruminococcaceae	Gemmiger	Gemmiger formicilis
BAE_40	BAE	BAE_b6234_1	34.8	2412129	0	86.33	3.12	FALSE	none	s		0	0	0	0	Firmicutes_A	Clostridia	Lachnospirales	Lachnospiraceae	Bariatricus	Bariatricus comes
BAE_41	BAE	BAE_b9719	33.9	2609732	2	79.79	0.35	FALSE	ok			1	2	1	2	Firmicutes_A	Clostridia	Lachnospirales	Lachnospiraceae	UMGS1370	UMGS1370 sp900542035
BAE_42	BAE	BAE_b3599_1	32.9	2422087	0	68.88	0	FALSE	none	s		0	0	0	0	Firmicutes_A	Clostridia	Lachnospirales	Lachnospiraceae	Dorea	Dorea formicigenerans
BAE_43	BAE	BAE_b12755	32.5	1959138	0	88.6	1.17	FALSE	none	v		0	0	0	0	Firmicutes_A	Clostridia	Oscillospirales	Butyricicoccaceae	Agathobaculum	Agathobaculum sp003481705
BAE_44	BAE	BAE_b5959	27.9	2317952	0	87.72	1.9	FALSE	none	s		0	0	0	0	Firmicutes_A	Clostridia	Lachnospirales	Lachnospiraceae	Clostridium_Q	Clostridium_Q fessum
BAE_45	BAE	BAE_b18698	27.6	3278018	0	90.32	1.58	FALSE	none	s		0	0	0	0	Firmicutes_A	Clostridia	Lachnospirales	Lachnospiraceae	KLE1615	KLE1615 sp900066985
BAE_46	BAE	BAE_b6058	27.1	2405033	0	52.04	1.72	FALSE	none	s		0	0	0	0	Firmicutes_A	Clostridia	Lachnospirales	Lachnospiraceae	Schaedlerella	Schaedlerella glycyrrhizinilytica_A
BAE_47	BAE	BAE_b29363_1	26.8	2558729	0	71.72	1.75	FALSE	none			0	0	0	0	Firmicutes_A	Clostridia	Lachnospirales	Lachnospiraceae	Enterocloster	Enterocloster sp001517625
BAE_48	BAE	BAE_b23959_1	26.3	2213215	0	61.56	7.02	FALSE	none			0	0	0	0	Firmicutes_A	Clostridia	Lachnospirales	Lachnospiraceae	Dorea_A	Dorea_A longicatena_B
BAE_49	BAE	BAE_b26625	25.1	2593065	0	74.94	4.09	FALSE	none			0	0	0	0	Firmicutes_A	Clostridia	Lachnospirales	Lachnospiraceae	Acetatifactor	Acetatifactor sp900066565
BAE_50	BAE	BAE_b5047_1	24.6	6887101	0	90.39	3.22	FALSE	none	s		0	0	0	0	Firmicutes_A	Clostridia	Lachnospirales	Lachnospiraceae	Hungatella	Hungatella effluvii
BAE_51	BAE	BAE_b12957	23.2	2196194	0	96.52	1.36	FALSE	none	a		0	0	0	0	Firmicutes_A	Clostridia	Oscillospirales	Acutalibacteraceae	UBA1417	UBA1417 sp003531055
BAE_52	BAE	BAE_b40630	22.3	2656192	0	77.18	1.62	FALSE	none	s		0	0	0	0	Firmicutes_A	Clostridia	Lachnospirales	Lachnospiraceae	Anaerobutyricum	Anaerobutyricum hallii
BAE_53	BAE	BAE_b26556_1	21.1	2252829	0	54.02	1.75	FALSE	none	s		0	0	0	0	Firmicutes_A	Clostridia	Lachnospirales	Lachnospiraceae	Blautia_A	Blautia_A obeum
BAE_54	BAE	BAE_b6203	17.4	3040707	0	74.9	1.72	FALSE	none			0	0	0	0	Firmicutes_A	Clostridia	Oscillospirales	Oscillospiraceae	Flavonifractor	Flavonifractor plautii
BAE_55	BAE	BAE_b37519_1	17.2	1262077	0	64.76	0.22	FALSE	none	a		0	0	0	0	Firmicutes_A	Clostridia	Oscillospirales	Butyricicoccaceae	Agathobaculum	Agathobaculum butyriciproducens
BAE_56	BAE	BAE_b21208	16.2	2080482	0	80.1	5.84	FALSE	none			0	0	0	0	Firmicutes_A	Clostridia	Oscillospirales	Oscillospiraceae	Lawsonibacter	Lawsonibacter sp900066825
BAE_57	BAE	BAE_b12208	16	2496114	0	88.29	1.73	FALSE	none			0	0	0	0	Actinobacteriota	Coriobacteriia	Coriobacteriales	Eggerthellaceae	Adlercreutzia	Adlercreutzia equolifaciens
BAE_58	BAE	BAE_b34909	15.2	2435574	0	58.43	0	FALSE	none			0	0	0	0	Firmicutes_A	Clostridia	Lachnospirales	Lachnospiraceae	Blautia	Blautia sp900541955
BAE_59	BAE	BAE_b18789	14.1	2096209	0	93.25	2.07	FALSE	none	s		0	0	0	0	Proteobacteria	Gammaproteobacteria	Burkholderiales	Burkholderiaceae	Sutterella	Sutterella sp905206365
BAE_60	BAE	BAE_b34699	13.5	1639472	0	72.9	1.34	FALSE	none	s		0	0	0	0	Firmicutes_A	Clostridia	Oscillospirales	Oscillospiraceae	Evtepia	Evtepia gabavorous
BAE_61	BAE	BAE_b4143_1	13.1	2117736	0	63.38	0	FALSE	none	s		0	0	0	0	Firmicutes_A	Clostridia	Lachnospirales	Lachnospiraceae	Eubacterium_G	Eubacterium_G ventriosum
BAE_62	BAE	BAE_b19926	12.7	785478	0	53.92	0	FALSE	none			0	0	0	0	Firmicutes	Bacilli	Lactobacillales	Streptococcaceae	Streptococcus	Streptococcus thermophilus
BAE_63	BAE	BAE_b8078	12.7	2794168	0	72.2	0.95	FALSE	none	l		0	0	0	0	Proteobacteria	Gammaproteobacteria	Enterobacterales	Enterobacteriaceae	Escherichia	Escherichia coli
BAE_64	BAE	BAE_b16381	12.3	2538813	0	80.21	2.59	FALSE	none	s		0	0	0	0	Firmicutes	Bacilli	Erysipelotrichales	Coprobacillaceae	Erysipelatoclostridium	Erysipelatoclostridium ramosum
BAE_65	BAE	BAE_b3622	12.2	2108639	0	84.93	1.85	FALSE	none	a		0	0	0	0	Firmicutes_A	Clostridia	UBA1381	UBA1381	CAG-41	CAG-41 sp900066215
BAE_66	BAE	BAE_b30	11.2	1225924	0	57.54	0.23	FALSE	none			0	0	0	0	Actinobacteriota	Actinomycetia	Actinomycetales	Bifidobacteriaceae	Bifidobacterium	Bifidobacterium pseudocatenulatum
BAE_67	BAE	BAE_b6567	10.8	1496005	0	55.42	1.36	FALSE	none			0	0	0	0	Firmicutes_A	Clostridia	Oscillospirales	Ruminococcaceae	Ruthenibacterium	Ruthenibacterium lactatiformans
BAF_1	BAF	BAF_b29549_1	1368.9	2356977	7	93.79	0.24	TRUE	ok	s		68	41	0	0	Firmicutes_A	Clostridia	Lachnospirales	Lachnospiraceae	Agathobacter	Agathobacter rectalis
BAF_2	BAF	BAF_b16797_1	860.2	3644977	0	92.19	0.75	TRUE	too_many	s		0	0	0	0	Bacteroidota	Bacteroidia	Bacteroidales	Bacteroidaceae	Phocaeicola	Phocaeicola vulgatus
BAF_3	BAF	BAF_b3721_1	590.4	2798155	0	90.67	1.12	TRUE	too_many	l		0	0	0	0	Bacteroidota	Bacteroidia	Bacteroidales	Bacteroidaceae	Bacteroides	Bacteroides stercoris
BAF_4	BAF	BAF_b2829_1	531.4	3590870	3	98.55	0.19	FALSE	ok	s		24	12	0	0	Bacteroidota	Bacteroidia	Bacteroidales	Bacteroidaceae	Paraprevotella	Paraprevotella clara
BAF_5	BAF	BAF_b2694	482.5	4000077	7	73.43	1.72	TRUE	ok	s	s->l	46	13	7	7	Bacteroidota	Bacteroidia	Bacteroidales	Bacteroidaceae	Bacteroides	Bacteroides uniformis
BAF_6	BAF	BAF_b26948_1	430.3	2917497	7	96.35	0	TRUE	ok	s	s->l	22	15	3	3	Firmicutes_A	Clostridia	Lachnospirales	Lachnospiraceae	Lachnospira	Lachnospira eligens_A
BAF_7	BAF	BAF_b3853_1	413	1769582	5	55.52	1.79	TRUE	ok			8	9	0	0	Firmicutes_A	Clostridia	Oscillospirales	Ruminococcaceae	Faecalibacterium	Faecalibacterium prausnitzii_J
BAF_8	BAF	BAF_b39852	403.1	1778775	3	95.7	0	FALSE	ok	s		2	1	0	0	Proteobacteria	Alphaproteobacteria	RF32	CAG-239	Scatocola	Scatocola faecipullorum
BAF_9	BAF	BAF_b11257	379.2	3087685	0	98.8	0.96	FALSE	none	s		0	0	0	0	Bacteroidota	Bacteroidia	Bacteroidales	Rikenellaceae	Alistipes	Alistipes onderdonkii
BAF_10	BAF	BAF_b8661_1	375.9	2849103	3	94.56	0.79	FALSE	ok			106	25	0	0	Firmicutes_A	Clostridia	Lachnospirales	Lachnospiraceae	Blautia_A	Blautia_A sp000436615
BAF_11	BAF	BAF_b31121	315.2	2925387	2	95.58	0	TRUE	ok			3	4	0	0	Verrucomicrobiota	Verrucomicrobiae	Verrucomicrobiales	Akkermansiaceae	Akkermansia	Akkermansia muciniphila_B
BAF_12	BAF	BAF_b33843	274.3	2061787	4	79.19	0.63	TRUE	ok			11	12	0	0	Firmicutes_A	Clostridia	Lachnospirales	Lachnospiraceae	Fusicatenibacter	Fusicatenibacter saccharivorans
BAF_13	BAF	BAF_b23508	272.8	2292264	3	93.15	0	FALSE	ok	a		2	3	1	1	Firmicutes_A	Clostridia	Oscillospirales	Ruminococcaceae	Ruminococcus_D	Ruminococcus_D bicirculans
BAF_14	BAF	BAF_b7715_1	241.6	2665872	0	97.19	2.89	FALSE	too_many	s		0	0	0	0	Firmicutes_A	Clostridia	Lachnospirales	Lachnospiraceae	Anaerostipes	Anaerostipes hadrus
BAF_15	BAF	BAF_b31015	238.9	1944821	0	89.97	4.7	TRUE	none	a		0	0	0	0	Firmicutes_A	Clostridia	Oscillospirales	Oscillospiraceae	CAG-83	CAG-83 sp000431575
BAF_16	BAF	BAF_b2922	234.6	2095180	3	97.02	1.04	TRUE	ok	s		5	4	0	0	Actinobacteriota	Actinomycetia	Actinomycetales	Bifidobacteriaceae	Bifidobacterium	Bifidobacterium pseudocatenulatum
BAF_17	BAF	BAF_b15193_1	222.3	3315153	4	92.54	0.19	TRUE	ok	s	s->l	5	5	1	1	Bacteroidota	Bacteroidia	Bacteroidales	Bacteroidaceae	Phocaeicola	Phocaeicola massiliensis
BAF_18	BAF	BAF_b36489	208.9	2102512	0	98.66	0.67	FALSE	none	a		0	0	0	0	Firmicutes_A	Clostridia	Oscillospirales	Acutalibacteraceae	Ruminococcus_E	Ruminococcus_E sp003526955
BAF_19	BAF	BAF_b38739_1	188	2753589	3	91.09	1.36	FALSE	ok	s		7	3	0	0	Firmicutes_A	Clostridia	Lachnospirales	Lachnospiraceae	Ruminococcus_B	Ruminococcus_B gnavus
BAF_20	BAF	BAF_b16584_1	184.5	3198589	3	57.08	0	FALSE	ok	s		173	32	0	0	Firmicutes_A	Clostridia	Lachnospirales	Lachnospiraceae	Blautia_A	Blautia_A sp905209435
BAF_21	BAF	BAF_b22335_1	161.8	1384036	2	53.57	1.79	FALSE	ok			3	3	0	0	Firmicutes_A	Clostridia	Oscillospirales	Ruminococcaceae	Faecalibacterium	Faecalibacterium prausnitzii_G
BAF_22	BAF	BAF_b6798_1	153	3370740	3	79.27	0	FALSE	ok	s		2	2	0	0	Firmicutes_A	Clostridia	Lachnospirales	Lachnospiraceae	Roseburia	Roseburia intestinalis
BAF_23	BAF	BAF_b13926_1	152.7	3124042	2	85.4	2.75	FALSE	ok	a		6	6	0	0	Firmicutes_A	Clostridia	Oscillospirales	Oscillospiraceae	Flavonifractor	Flavonifractor plautii
BAF_24	BAF	BAF_b30025_1	149.5	6586139	2	77.93	0	FALSE	ok	f		1	1	0	0	Bacteroidota	Bacteroidia	Bacteroidales	Bacteroidaceae	Bacteroides	Bacteroides sp900552405
BAF_25	BAF	BAF_b3116	149.1	3828077	0	96.9	0	FALSE	none	l		0	0	0	0	Bacteroidota	Bacteroidia	Bacteroidales	Tannerellaceae	Parabacteroides	Parabacteroides merdae
BAF_26	BAF	BAF_b17042_1	148.2	2436636	3	89.65	0.68	TRUE	ok	a		4	2	0	0	Firmicutes_A	Clostridia	Oscillospirales	Ruminococcaceae	Gemmiger	Gemmiger qucibialis
BAF_27	BAF	BAF_b27044	142	2197702	3	99.93	0.81	TRUE	ok	s	s->f	11	11	5	5	Actinobacteriota	Coriobacteriia	Coriobacteriales	Coriobacteriaceae	Collinsella	Collinsella sp.
BAF_28	BAF	BAF_b8448_1	132.8	2606194	2	70.78	7.14	TRUE	ok			10	11	0	0	Firmicutes_A	Clostridia	Oscillospirales	Ruminococcaceae	Gemmiger	Gemmiger sp900540775
BAF_29	BAF	BAF_b6820	131.2	3068337	0	98.29	0	TRUE	none	s		0	0	0	0	Bacteroidota	Bacteroidia	Bacteroidales	Barnesiellaceae	Barnesiella	Barnesiella intestinihominis
BAF_30	BAF	BAF_b18053	129.7	2732841	0	96.89	0	FALSE	none	s		0	0	0	0	Proteobacteria	Gammaproteobacteria	Burkholderiales	Burkholderiaceae	Sutterella	Sutterella wadsworthensis
BAF_31	BAF	BAF_b27936	127.5	2703764	2	96.4	0.34	FALSE	ok	v		2	1	1	1	Firmicutes_A	Clostridia	Oscillospirales	Acutalibacteraceae	UBA1417	UBA1417 sp900549945
BAF_32	BAF	BAF_b24905_1	126.8	3012721	2	74	1.75	FALSE	ok			4	4	0	0	Firmicutes_A	Clostridia	Lachnospirales	Lachnospiraceae	Blautia_A	Blautia_A faecis
BAF_33	BAF	BAF_b19858_1	119.8	2780298	2	91.41	3.64	FALSE	ok			1	1	0	0	Firmicutes_A	Clostridia	Lachnospirales	Lachnospiraceae	Blautia_A	Blautia_A massiliensis
BAF_34	BAF	BAF_b22153_1	118.8	2639052	0	93.18	1.56	TRUE	none	s		0	0	0	0	Firmicutes_A	Clostridia	Lachnospirales	Lachnospiraceae	Bariatricus	Bariatricus comes
BAF_35	BAF	BAF_b10705_2	105.3	1223746	0	57.05	0	FALSE	none			0	0	0	0	Firmicutes_A	Clostridia	Oscillospirales	Ruminococcaceae	Ruminococcus_C	Ruminococcus_C sp000433635
BAF_36	BAF	BAF_b10032_1	104	2300788	2	89.01	4.53	FALSE	ok			4	0	0	0	Firmicutes_A	Clostridia	Oscillospirales	Oscillospiraceae	Dysosmobacter	Dysosmobacter sp900544105
BAF_37	BAF	BAF_b3983_1	103.6	1910379	0	91.97	1.47	FALSE	too_many	s		0	0	0	0	Actinobacteriota	Actinomycetia	Actinomycetales	Bifidobacteriaceae	Bifidobacterium	Bifidobacterium longum
BAF_38	BAF	BAF_b25495	101.5	2455739	0	94.97	1	TRUE	none	s		0	0	0	0	Firmicutes_A	Clostridia	Lachnospirales	Lachnospiraceae	Mediterraneibacter	Mediterraneibacter torques
BAF_39	BAF	BAF_b26956_1	96.1	2853563	0	90.74	1.45	FALSE	none	s		0	0	0	0	Firmicutes_A	Clostridia	Lachnospirales	Lachnospiraceae	Roseburia	Roseburia hominis
BAF_40	BAF	BAF_b15859	90.3	2644837	0	96.98	0	FALSE	none	s		0	0	0	0	Firmicutes_A	Clostridia	Lachnospirales	Lachnospiraceae	Butyribacter	Butyribacter sp003529475
BAF_41	BAF	BAF_b8715_1	84.8	3387087	2	95.19	2.85	FALSE	ok	s		2	1	0	0	Firmicutes_A	Clostridia	Lachnospirales	Lachnospiraceae	KLE1615	KLE1615 sp900066985
BAF_42	BAF	BAF_b30874_1	73.6	2201952	2	62.07	0	FALSE	ok			57	46	0	0	Firmicutes_A	Clostridia	Lachnospirales	Lachnospiraceae	Roseburia	Roseburia inulinivorans
BAF_43	BAF	BAF_b22927	68.7	2384188	2	91.89	0	FALSE	ok	a		2	2	0	0	Firmicutes_A	Clostridia	Oscillospirales	Acutalibacteraceae	Clostridium_A	Clostridium_A leptum
BAF_44	BAF	BAF_b26082_1	67.6	2580101	0	50.16	5.26	FALSE	none			0	0	0	0	Firmicutes_A	Clostridia	Lachnospirales	Lachnospiraceae	Acetatifactor	Acetatifactor sp900066565
BAF_45	BAF	BAF_b6096_1	67.6	2482645	0	70.61	1.75	FALSE	none			0	0	0	0	Firmicutes_A	Clostridia	Lachnospirales	Lachnospiraceae	Dorea_A	Dorea_A longicatena_B
BAF_46	BAF	BAF_b5999_1	66.3	4481811	0	82.23	0.86	FALSE	none	s		0	0	0	0	Bacteroidota	Bacteroidia	Bacteroidales	Tannerellaceae	Parabacteroides	Parabacteroides distasonis
BAF_47	BAF	BAF_b42511_1	65.1	2630290	0	98.6	0.69	FALSE	none	s		0	0	0	0	Firmicutes_A	Clostridia	Lachnospirales	Lachnospiraceae	Eubacterium_F	Eubacterium_F sp003491505
BAF_48	BAF	BAF_b10212_1	60.8	2405523	0	92.31	1.23	FALSE	none	s		0	0	0	0	Firmicutes_A	Clostridia	Lachnospirales	Lachnospiraceae	Lachnospira	Lachnospira sp900316325
BAF_49	BAF	BAF_b10885_1	60.4	2185483	0	74.12	9.2	FALSE	none			0	0	0	0	Firmicutes_A	Clostridia	Oscillospirales	Oscillospiraceae	Dysosmobacter	Dysosmobacter welbionis
BAF_50	BAF	BAF_b25339_1	59.5	3200347	0	62.07	2.63	FALSE	none	s		0	0	0	0	Firmicutes_A	Clostridia	Lachnospirales	Lachnospiraceae	Enterocloster	Enterocloster sp000431375
BAF_51	BAF	BAF_b31678_1	59.2	2473173	0	87.37	3.04	FALSE	none			0	0	0	0	Firmicutes_A	Clostridia	Oscillospirales	Oscillospiraceae	Lawsonibacter	Lawsonibacter asaccharolyticus
BAF_52	BAF	BAF_b7605	57.2	2410170	0	99.98	1.5	FALSE	none	i		0	0	0	0	Firmicutes_C	Negativicutes	Acidaminococcales	Acidaminococcaceae	Phascolarctobacterium	Phascolarctobacterium faecium
BAF_53	BAF	BAF_b21763_1	53.9	2400139	0	95.62	2.44	FALSE	none	s		0	0	0	0	Firmicutes_A	Clostridia	Lachnospirales	Lachnospiraceae	Blautia	Blautia sp900555025
BAF_54	BAF	BAF_b29413_1	51.7	2165107	0	82.26	2.63	FALSE	none	s		0	0	0	0	Firmicutes_A	Clostridia	Lachnospirales	Lachnospiraceae	UBA11774	UBA11774 sp003507655
BAF_55	BAF	BAF_b20470	50.7	2068840	0	57.81	3.51	FALSE	none	s		0	0	0	0	Firmicutes_A	Clostridia	Lachnospirales	Lachnospiraceae	Copromonas	Copromonas sp900066535
BAF_56	BAF	BAF_b17156_1	47.9	2631856	0	80.43	2.85	FALSE	none	s		0	0	0	0	Firmicutes_A	Clostridia	Lachnospirales	Lachnospiraceae	Anaerobutyricum	Anaerobutyricum hallii
BAF_57	BAF	BAF_b225	47.4	2748771	0	94.96	1.27	FALSE	none	t		0	0	0	0	Firmicutes_A	Clostridia	Lachnospirales	Lachnospiraceae	Copromonas	Copromonas sp000435795
BAF_58	BAF	BAF_b15988_1	46.7	2269000	2	70.65	5.26	FALSE	ok	s		1	1	0	0	Firmicutes_A	Clostridia	Lachnospirales	Lachnospiraceae	Agathobacter	Agathobacter faecis
BAF_59	BAF	BAF_b45594_1	43.5	2343530	0	89.24	2.01	FALSE	none	s		0	0	0	0	Firmicutes_A	Clostridia	Lachnospirales	Lachnospiraceae	Clostridium_Q	Clostridium_Q fessum
BAF_60	BAF	BAF_b6273_1	40.4	5711685	0	54.31	8.62	FALSE	none			0	0	0	0	Bacteroidota	Bacteroidia	Bacteroidales	Bacteroidaceae	Bacteroides	Bacteroides thetaiotaomicron
BAF_61	BAF	BAF_b26974	37.4	2161390	0	97.87	0	FALSE	none	s		0	0	0	0	Firmicutes_A	Clostridia	Peptostreptococcales	Anaerovoracaceae	Fimisoma	Fimisoma sp000435715
BAF_62	BAF	BAF_b23816	35.4	2350213	0	96.1	1.34	FALSE	none	a		0	0	0	0	Firmicutes_A	Clostridia	Oscillospirales	Butyricicoccaceae	Agathobaculum	Agathobaculum butyriciproducens
BAF_63	BAF	BAF_b9904_1	32.5	3933515	2	52.59	3.45	FALSE	ok	s		17	3	0	0	Bacteroidota	Bacteroidia	Bacteroidales	Bacteroidaceae	Bacteroides	Bacteroides caccae
BAF_64	BAF	BAF_b30476	32.3	1844703	0	97.01	0	FALSE	none	a		0	0	0	0	Firmicutes_A	Clostridia	Oscillospirales	Acutalibacteraceae	Eubacterium_R	Eubacterium_R coprostanoligenes
BAF_65	BAF	BAF_b22150_1	31.3	2230292	0	62.44	5.26	FALSE	none	s		0	0	0	0	Firmicutes_A	Clostridia	Lachnospirales	Lachnospiraceae	Anaerobutyricum	Anaerobutyricum soehngenii
BAF_66	BAF	BAF_b2622_1	30.1	2511326	0	73.11	0	FALSE	none	s		0	0	0	0	Firmicutes_A	Clostridia	Lachnospirales	Lachnospiraceae	Dorea	Dorea formicigenerans
BAF_67	BAF	BAF_b24885	28.3	3958992	2	99.41	2.07	FALSE	ok	s		1	1	0	0	Desulfobacterota_I	Desulfovibrionia	Desulfovibrionales	Desulfovibrionaceae	Bilophila	Bilophila wadsworthia
BAF_68	BAF	BAF_b18827_1	27.3	2505322	0	86.95	2.85	FALSE	none			0	0	0	0	Firmicutes_A	Clostridia	Lachnospirales	Lachnospiraceae	Ventrimonas	Ventrimonas sp003480315
BAF_69	BAF	BAF_b25973_1	26.3	2634899	0	76.67	3.51	FALSE	none			0	0	0	0	Firmicutes_A	Clostridia	Lachnospirales	Lachnospiraceae	Enterocloster	Enterocloster sp001517625
BAF_70	BAF	BAF_b1491_1	23.8	2655446	0	96.55	3.9	FALSE	none	s		0	0	0	0	Firmicutes_A	Clostridia	Christensenellales	CAG-74	Ventricola	Ventricola sp900542445
BAF_71	BAF	BAF_b42319_1	23.5	2348337	0	64.11	3.45	FALSE	none	s		0	0	0	0	Firmicutes_A	Clostridia	Lachnospirales	Lachnospiraceae	Mediterraneibacter	Mediterraneibacter faecis
BAF_72	BAF	BAF_b2314	23.4	2571849	0	91.47	4.56	FALSE	none	s		0	0	0	0	Actinobacteriota	Coriobacteriia	Coriobacteriales	Eggerthellaceae	Adlercreutzia	Adlercreutzia equolifaciens
BAF_73	BAF	BAF_b12301_1	22.9	1828360	0	61.52	1.72	FALSE	none			0	0	0	0	Firmicutes_A	Clostridia	Oscillospirales	Oscillospiraceae	Evtepia	Evtepia sp004556345
BAF_74	BAF	BAF_b7244	22.1	2927716	0	77.65	5.36	FALSE	none	l		0	0	0	0	Actinobacteriota	Coriobacteriia	Coriobacteriales	Eggerthellaceae	Gordonibacter	Gordonibacter pamelaeae
BAF_75	BAF	BAF_b16518_1	21.4	2269519	0	93.1	2.01	FALSE	none	s		0	0	0	0	Firmicutes_A	Clostridia	Lachnospirales	Lachnospiraceae	Eubacterium_G	Eubacterium_G ventriosum
BAF_76	BAF	BAF_b16734	21.1	2452787	0	75.83	0.86	FALSE	none			0	0	0	0	Firmicutes_A	Clostridia	Oscillospirales	Oscillospiraceae	Enterenecus	Enterenecus sp900549885
BAF_77	BAF	BAF_b24589_1	21.1	2467522	0	74.67	1.75	FALSE	none	s		0	0	0	0	Firmicutes_A	Clostridia	Lachnospirales	Lachnospiraceae	Lachnospira	Lachnospira sp900545725
BAF_78	BAF	BAF_b13380	19.2	1828109	0	93.75	2.42	FALSE	none	f		0	0	0	0	Actinobacteriota	Coriobacteriia	Coriobacteriales	Eggerthellaceae	CAG-1427	CAG-1427 sp000436075
BAF_79	BAF	BAF_b16697_1	18.2	2542830	0	96.23	0.63	FALSE	none	s		0	0	0	0	Firmicutes	Bacilli	Erysipelotrichales	Coprobacillaceae	Faecalibacillus	Faecalibacillus intestinalis
BAF_80	BAF	BAF_b29619	16.9	1880203	0	81.83	1.51	FALSE	none	a		0	0	0	0	Firmicutes_A	Clostridia	Oscillospirales	Ruminococcaceae	Avimicrobium	Avimicrobium caecorum
BAF_81	BAF	BAF_b15394_1	16.5	2617960	0	93.94	1.17	FALSE	none	a		0	0	0	0	Firmicutes_A	Clostridia	UBA1381	UBA1381	CAG-41	CAG-41 sp900066215
BAF_82	BAF	BAF_b4468	16.5	2444466	0	57.02	0	FALSE	none			0	0	0	0	Firmicutes_A	Clostridia	Lachnospirales	Lachnospiraceae	Blautia	Blautia sp900541955
BAF_83	BAF	BAF_b30710_1	15.9	2551217	0	77.98	3.91	FALSE	none			0	0	0	0	Firmicutes_A	Clostridia	Oscillospirales	Ruminococcaceae	Ruthenibacterium	Ruthenibacterium lactatiformans
BAF_84	BAF	BAF_b2631	15.8	2400825	0	55.09	3.45	FALSE	none			0	0	0	0	Firmicutes_A	Clostridia	Oscillospirales	Oscillospiraceae	Dysosmobacter	Dysosmobacter sp014297375
BAF_85	BAF	BAF_b33039_1	15.7	1838639	0	53.99	0	FALSE	none			0	0	0	0	Firmicutes_A	Clostridia	Lachnospirales	Lachnospiraceae	Lachnoclostridium_B	Lachnoclostridium_B sp900066555
BAF_86	BAF	BAF_b38616_1	15.5	2284381	0	84.98	2.07	FALSE	none	a		0	0	0	0	Firmicutes_A	Clostridia	Monoglobales	Monoglobaceae	Monoglobus	Monoglobus pectinilyticus
BAF_87	BAF	BAF_b30538	15.4	2179565	0	61.21	2.82	FALSE	none			0	0	0	0	Actinobacteriota	Coriobacteriia	Coriobacteriales	Eggerthellaceae	Eggerthella	Eggerthella lenta
BAF_88	BAF	BAF_b7951	13	1816069	0	62.46	0	FALSE	none			0	0	0	0	Firmicutes_A	Clostridia	Lachnospirales	Lachnospiraceae	Frisingicoccus	Frisingicoccus sp900757195
BAG_1	BAG	BAG_b35249_1	812.1	2996940	3	97.18	1.05	FALSE	ok	s		105	5	98	1	Bacteroidota	Bacteroidia	Bacteroidales	Bacteroidaceae	Prevotella	Prevotella copri
BAG_2	BAG	BAG_b16962_1	496.4	2671550	0	91.49	4.06	TRUE	too_many	s		0	0	0	0	Firmicutes_A	Clostridia	Lachnospirales	Lachnospiraceae	Fusicatenibacter	Fusicatenibacter saccharivorans
BAG_3	BAG	BAG_b3943_2	468	2223109	0	90.16	2.87	TRUE	too_many	s		0	0	0	0	Firmicutes_A	Clostridia	Lachnospirales	Lachnospiraceae	Agathobacter	Agathobacter faecis
BAG_4	BAG	BAG_b17166_1	456.9	2691296	0	73.55	2.63	TRUE	too_many	s		0	0	0	0	Firmicutes_A	Clostridia	Lachnospirales	Lachnospiraceae	Roseburia	Roseburia intestinalis
BAG_5	BAG	BAG_b885_1	456.8	1427701	0	58.05	0	TRUE	too_many	s		0	0	0	0	Firmicutes_A	Clostridia	Lachnospirales	Lachnospiraceae	Agathobacter	Agathobacter rectalis
BAG_6	BAG	BAG_b37104_1	309	1870455	0	83.17	1.59	TRUE	too_many	a		0	0	0	0	Firmicutes_A	Clostridia	Oscillospirales	Ruminococcaceae	Gemmiger	Gemmiger qucibialis
BAG_7	BAG	BAG_b20132	307.8	1575885	0	85.04	1.36	TRUE	too_many	s		0	0	0	0	Bacteroidota	Bacteroidia	Bacteroidales	Rikenellaceae	Alistipes	Alistipes putredinis
BAG_8	BAG	BAG_b21855_1	300.6	4118521	0	82.4	3.45	TRUE	too_many	f		0	0	0	0	Bacteroidota	Bacteroidia	Bacteroidales	Bacteroidaceae	Phocaeicola	Phocaeicola vulgatus
BAG_9	BAG	BAG_b60854_1	259.3	2352258	5	85.23	4.92	TRUE	ok			20	8	0	0	Firmicutes_A	Clostridia	Lachnospirales	Lachnospiraceae	Anaerostipes	Anaerostipes hadrus_A
BAG_10	BAG	BAG_b4839	237.4	2540527	3	95.05	2.41	TRUE	ok	s		83	66	0	0	Firmicutes_A	Clostridia	Lachnospirales	Lachnospiraceae	Dorea_A	Dorea_A longicatena
BAG_11	BAG	BAG_b40587_1	236	2498543	3	72.44	1.75	FALSE	ok	s		5	4	0	0	Firmicutes_A	Clostridia	Lachnospirales	Lachnospiraceae	Agathobacter	Agathobacter sp905209075
BAG_12	BAG	BAG_b22642_1	196.5	2742860	2	95.24	1.45	FALSE	ok			9	8	0	0	Firmicutes_A	Clostridia	Lachnospirales	Lachnospiraceae	Eubacterium_I	Eubacterium_I ramulus
BAG_13	BAG	BAG_b54846	196.1	3501818	3	95.16	0.19	FALSE	ok	s		8	1	0	0	Bacteroidota	Bacteroidia	Bacteroidales	Bacteroidaceae	Paraprevotella	Paraprevotella clara
BAG_14	BAG	BAG_b19390_1	191.2	2550623	3	95.8	0.62	TRUE	ok	s	s->l	17	4	1	1	Firmicutes_A	Clostridia	Lachnospirales	Lachnospiraceae	Lachnospira	Lachnospira eligens_A
BAG_15	BAG	BAG_b20955	191	3138127	3	77.59	0	TRUE	ok	s	s->l	8	4	3	3	Bacteroidota	Bacteroidia	Bacteroidales	Bacteroidaceae	Phocaeicola	Phocaeicola coprocola
BAG_16	BAG	BAG_b18485	188.6	2523015	3	97.95	0	TRUE	ok	a		25	5	0	0	Firmicutes_A	Clostridia	Oscillospirales	Ruminococcaceae	Ruminococcus_D	Ruminococcus_D bicirculans
BAG_17	BAG	BAG_b54576_1	184.1	2525281	3	61.8	1.75	TRUE	ok			100	53	0	0	Firmicutes_A	Clostridia	Lachnospirales	Lachnospiraceae	Acetatifactor	Acetatifactor sp900066565
BAG_18	BAG	BAG_b42775_1	169	3202572	3	95.9	0	TRUE	ok	s		25	21	0	0	Firmicutes_A	Clostridia	Lachnospirales	Lachnospiraceae	Butyribacter	Butyribacter intestini
BAG_19	BAG	BAG_b20709_1	154.2	2132837	2	94.3	9.34	FALSE	ok	a		2	2	0	0	Actinobacteriota	Actinomycetia	Actinomycetales	Bifidobacteriaceae	Bifidobacterium	Bifidobacterium bifidum
BAG_20	BAG	BAG_b32631_1	154.2	1776316	0	97.99	1.68	FALSE	too_many	a		0	0	0	0	Firmicutes_A	Clostridia	Oscillospirales	Acutalibacteraceae	Ruminococcus_E	Ruminococcus_E bromii_B
BAG_21	BAG	BAG_b33607_1	151.2	2169736	4	90.17	2.27	TRUE	ok	s		93	78	3	3	Firmicutes_A	Clostridia	Lachnospirales	Lachnospiraceae	Bariatricus	Bariatricus comes
BAG_22	BAG	BAG_b20452_1	148.6	3554379	3	91.94	0.56	TRUE	ok	s	s->l	13	6	2	2	Bacteroidota	Bacteroidia	Bacteroidales	Bacteroidaceae	Phocaeicola	Phocaeicola massiliensis
BAG_23	BAG	BAG_b31911	142.5	2358626	0	93.63	0	FALSE	none	a		0	0	0	0	Firmicutes_A	Clostridia	Oscillospirales	Oscillospiraceae	Faecousia	Faecousia sp000434635
BAG_24	BAG	BAG_b30300	141.9	2180874	2	98.41	1.34	FALSE	ok	a		1	1	0	0	Firmicutes_A	Clostridia	Oscillospirales	Butyricicoccaceae	Butyricicoccus_A	Butyricicoccus_A sp002395695
BAG_25	BAG	BAG_b41803_1	140.5	1898084	0	53.51	0.88	TRUE	too_many			0	0	0	0	Firmicutes_A	Clostridia	Lachnospirales	Lachnospiraceae	Roseburia	Roseburia inulinivorans
BAG_26	BAG	BAG_b40821_1	137.2	1527922	3	79.12	3.8	TRUE	ok			69	45	0	0	Firmicutes_A	Clostridia	Oscillospirales	Oscillospiraceae	ER4	ER4 sp000765235
BAG_27	BAG	BAG_b50410_1	130.4	2486093	3	95.47	0.45	FALSE	ok	l		14	5	10	2	Firmicutes_A	Clostridia	Lachnospirales	Lachnospiraceae	Lachnospira	Lachnospira rogosae_A
BAG_28	BAG	BAG_b16274_1	123.8	2202324	3	56.14	1.75	FALSE	ok			54	16	0	0	Firmicutes_A	Clostridia	Lachnospirales	Lachnospiraceae	Blautia_A	Blautia_A luti
BAG_29	BAG	BAG_b451	119.5	1335933	0	63.29	0	FALSE	none	t		0	0	0	0	Firmicutes_C	Negativicutes	Veillonellales	Dialisteraceae	Dialister	Dialister invisus
BAG_30	BAG	BAG_b48228	118.1	2065574	2	94.31	2.35	FALSE	ok			1	1	0	0	Firmicutes_A	Clostridia	Oscillospirales	Oscillospiraceae	CAG-103	CAG-103 sp900543625
BAG_31	BAG	BAG_b7057_1	115.6	1617201	0	76.18	2.29	TRUE	too_many			0	0	0	0	Firmicutes_A	Clostridia	Lachnospirales	Lachnospiraceae	Mediterraneibacter	Mediterraneibacter faecis
BAG_32	BAG	BAG_b57994_1	107.2	2913280	3	75.63	2.59	FALSE	ok	l		211	32	140	22	Bacteroidota	Bacteroidia	Bacteroidales	Rikenellaceae	Alistipes	Alistipes onderdonkii
BAG_33	BAG	BAG_b4704	103.2	1770571	0	89.26	0	FALSE	none	a		0	0	0	0	Firmicutes_A	Clostridia	Oscillospirales	Ruminococcaceae	Ruminococcus_C	Ruminococcus_C sp000433635
BAG_34	BAG	BAG_b44503_1	96.5	2498000	2	91.96	1	TRUE	ok	s		49	45	7	8	Firmicutes_A	Clostridia	Lachnospirales	Lachnospiraceae	UMGS1375	UMGS1375 sp900066615
BAG_35	BAG	BAG_b8097	93.9	2064631	0	92.95	0	FALSE	none	a		0	0	0	0	Firmicutes_A	Clostridia	Oscillospirales	Acutalibacteraceae	CAG-177	CAG-177 sp003514385
BAG_36	BAG	BAG_b7979_1	92.1	2254983	4	64.77	3.57	TRUE	ok			11	5	0	0	Firmicutes_A	Clostridia	Oscillospirales	Ruminococcaceae	Gemmiger	Gemmiger formicilis
BAG_37	BAG	BAG_b10042_1	91.2	2012857	0	98.93	3.39	FALSE	none			0	0	0	0	Actinobacteriota	Coriobacteriia	Coriobacteriales	Atopobiaceae	Paratractidigestivibacter	Paratractidigestivibacter sp003150175
BAG_38	BAG	BAG_b47761_1	90.1	4317290	4	70.69	0	FALSE	ok			38	15	2	2	Bacteroidota	Bacteroidia	Bacteroidales	Bacteroidaceae	Bacteroides	Bacteroides caccae
BAG_39	BAG	BAG_b35900_1	90	3195867	0	75.16	2.59	TRUE	too_many	s		0	0	0	0	Bacteroidota	Bacteroidia	Bacteroidales	Bacteroidaceae	Bacteroides	Bacteroides uniformis
BAG_40	BAG	BAG_b2703	87.8	1855175	0	96.28	0	TRUE	none	a		0	0	0	0	Firmicutes_A	Clostridia	Oscillospirales	Acutalibacteraceae	Eubacterium_R	Eubacterium_R sp000434995
BAG_41	BAG	BAG_b45007_1	87.4	1729400	0	68.05	0.88	FALSE	none	s		0	0	0	0	Actinobacteriota	Actinomycetia	Actinomycetales	Bifidobacteriaceae	Bifidobacterium	Bifidobacterium adolescentis
BAG_42	BAG	BAG_b22519_1	87	3120254	2	93.57	3.72	FALSE	ok	s		64	44	15	11	Firmicutes_A	Clostridia	Lachnospirales	Lachnospiraceae	COE1	COE1 sp001916965
BAG_43	BAG	BAG_b6739_1	84.3	2022646	0	74.88	2.41	FALSE	none	s		0	0	0	0	Firmicutes_A	Clostridia	Lachnospirales	Lachnospiraceae	Eisenbergiella	Eisenbergiella sp900066775
BAG_44	BAG	BAG_b30107_1	75.8	1664076	0	80.29	5.65	FALSE	none			0	0	0	0	Firmicutes_A	Clostridia	Oscillospirales	Oscillospiraceae	CAG-83	CAG-83 sp001916855
BAG_45	BAG	BAG_b17457_1	72	3177453	3	92.03	1.42	FALSE	ok	s		5	2	1	1	Firmicutes_A	Clostridia	Lachnospirales	Lachnospiraceae	KLE1615	KLE1615 sp900066985
BAG_46	BAG	BAG_b21901_1	69.8	2024670	0	88.41	1.8	FALSE	none			0	0	0	0	Firmicutes_A	Clostridia	Oscillospirales	Oscillospiraceae	Faecousia	Faecousia sp003525905
BAG_47	BAG	BAG_b33019_1	68.1	1947277	0	84.29	6.42	FALSE	none			0	0	0	0	Firmicutes_A	Clostridia	Oscillospirales	Oscillospiraceae	CAG-83	CAG-83 sp900545585
BAG_48	BAG	BAG_b31362	66	2798940	3	74.91	1.75	FALSE	ok	s		11	4	5	2	Firmicutes_A	Clostridia	Lachnospirales	Lachnospiraceae	Roseburia	Roseburia hominis
BAG_49	BAG	BAG_b30172_1	63	2903006	2	72.44	2.63	FALSE	ok			81	31	0	0	Firmicutes_A	Clostridia	Lachnospirales	Lachnospiraceae	Anaerobutyricum	Anaerobutyricum hallii
BAG_50	BAG	BAG_b30912	61.8	2401971	3	72.93	5.17	FALSE	ok			27	6	27	6	Bacteroidota	Bacteroidia	Bacteroidales	Rikenellaceae	Alistipes	Alistipes shahii
BAG_51	BAG	BAG_b35000_1	58.8	1811584	2	86.66	4.59	FALSE	ok	s		1	2	0	0	Actinobacteriota	Actinomycetia	Actinomycetales	Bifidobacteriaceae	Bifidobacterium	Bifidobacterium angulatum
BAG_52	BAG	BAG_b9285_1	58.2	1955651	0	87.45	2.37	FALSE	none			0	0	0	0	Firmicutes_A	Clostridia	Oscillospirales	Butyricicoccaceae	Agathobaculum	Agathobaculum sp003481705
BAG_53	BAG	BAG_b7110	55.9	2713401	0	96.64	0.34	FALSE	none	a		0	0	0	0	Firmicutes_A	Clostridia	Oscillospirales	Ruminococcaceae	CAG-115	CAG-115 sp003531585
BAG_54	BAG	BAG_b47632_1	54	1845548	0	57.47	3.57	FALSE	none			0	0	0	0	Firmicutes_A	Clostridia	Oscillospirales	Ruminococcaceae	Gemmiger	Gemmiger sp900539695
BAG_55	BAG	BAG_b23910_1	50.3	2079104	2	54.56	5.61	FALSE	ok	s		2	1	0	0	Firmicutes_A	Clostridia	Lachnospirales	Lachnospiraceae	Oliverpabstia	Oliverpabstia intestinalis
BAG_56	BAG	BAG_b67658_1	50.2	3146584	0	99.13	0.45	FALSE	none	s		0	0	0	0	Bacteroidota	Bacteroidia	Bacteroidales	Barnesiellaceae	Barnesiella	Barnesiella intestinihominis
BAG_57	BAG	BAG_b26327	48.1	2454184	0	96.89	0.62	FALSE	none	s		0	0	0	0	Proteobacteria	Gammaproteobacteria	Burkholderiales	Burkholderiaceae	Sutterella	Sutterella wadsworthensis_A
BAG_58	BAG	BAG_b64245	43	2500102	2	97.2	1.33	FALSE	ok	s		14	5	3	2	Proteobacteria	Gammaproteobacteria	Burkholderiales	Burkholderiaceae	Sutterella	Sutterella wadsworthensis
BAG_59	BAG	BAG_b37106_1	34.8	2913476	2	68.42	1.75	FALSE	ok	s		1	1	0	0	Firmicutes_A	Clostridia	Lachnospirales	Lachnospiraceae	Limivivens	Limivivens sp900543575
BAG_60	BAG	BAG_b32379_1	33.5	1806331	0	53.21	0	FALSE	none			0	0	0	0	Actinobacteriota	Actinomycetia	Actinomycetales	Bifidobacteriaceae	Bifidobacterium	Bifidobacterium longum
BAG_61	BAG	BAG_b24164_1	32.5	5165955	0	70.49	1.72	FALSE	none	s		0	0	0	0	Bacteroidota	Bacteroidia	Bacteroidales	Bacteroidaceae	Bacteroides	Bacteroides intestinalis
BAG_62	BAG	BAG_b28960_1	31.9	2016551	0	93.27	3.02	FALSE	none	a		0	0	0	0	Firmicutes_A	Clostridia	UBA1381	UBA1381	CAG-41	CAG-41 sp900066215
BAG_63	BAG	BAG_b6252_1	31.6	1778982	0	58.93	1.72	FALSE	none			0	0	0	0	Firmicutes_A	Clostridia	Lachnospirales	Lachnospiraceae	Choladocola	Choladocola sp003480725
BAG_64	BAG	BAG_b18807_1	30.8	2545570	0	97.69	2.98	FALSE	none	s		0	0	0	0	Firmicutes_A	Clostridia	Peptostreptococcales	Peptostreptococcaceae	Romboutsia	Romboutsia timonensis
BAG_65	BAG	BAG_b26605_1	30.6	2235987	0	61	1.75	FALSE	none	s		0	0	0	0	Firmicutes_A	Clostridia	Lachnospirales	Lachnospiraceae	Dorea	Dorea formicigenerans
BAG_66	BAG	BAG_b8834_1	29.8	2097789	0	96.55	1.7	FALSE	none	a		0	0	0	0	Firmicutes_A	Clostridia	Oscillospirales	Acutalibacteraceae	UBA1417	UBA1417 sp003531055
BAG_67	BAG	BAG_b2727_1	27.1	2247906	0	77.86	5.26	FALSE	none			0	0	0	0	Firmicutes_A	Clostridia	Lachnospirales	Lachnospiraceae	Eubacterium_G	Eubacterium_G ventriosum
BAG_68	BAG	BAG_b32194_1	26.7	1329120	0	62.38	4.31	FALSE	none			0	0	0	0	Firmicutes_A	Clostridia	Oscillospirales	Oscillospiraceae	ER4	ER4 sp900317525
BAG_69	BAG	BAG_b9316_1	25.5	3901913	0	67.57	3.45	FALSE	none	s		0	0	0	0	Bacteroidota	Bacteroidia	Bacteroidales	Tannerellaceae	Parabacteroides	Parabacteroides merdae
BAG_70	BAG	BAG_b15700_1	23.8	3033429	0	51.91	2.63	FALSE	none			0	0	0	0	Firmicutes_A	Clostridia	Lachnospirales	Lachnospiraceae	Blautia_A	Blautia_A sp900066145
BAG_71	BAG	BAG_b11422_1	23.3	2136581	0	83.74	2.87	FALSE	none			0	0	0	0	Firmicutes_A	Clostridia	Oscillospirales	Oscillospiraceae	Evtepia	Evtepia excrementipullorum
BAG_72	BAG	BAG_b5596	22.2	2223599	0	57.24	0.86	FALSE	none	s		0	0	0	0	Bacteroidota	Bacteroidia	Bacteroidales	Rikenellaceae	Alistipes	Alistipes communis
BAG_73	BAG	BAG_b54061_1	21	1995456	0	64.45	6.03	FALSE	none			0	0	0	0	Firmicutes_A	Clostridia	Oscillospirales	Oscillospiraceae	CAG-170	CAG-170 sp002404795
BAG_74	BAG	BAG_b43095_1	20.9	1224111	0	89.33	0	FALSE	none	t		0	0	0	0	Firmicutes	Bacilli	RF39	UBA660	CAG-605	CAG-605 sp000433255
BAG_75	BAG	BAG_b11036_1	20.5	2096291	2	53.67	0.88	FALSE	ok			1	1	0	0	Firmicutes_A	Clostridia	Lachnospirales	Lachnospiraceae	Clostridium_Q	Clostridium_Q fessum
BAG_76	BAG	BAG_b5733_1	20.2	1927786	0	80.64	3.19	FALSE	none			0	0	0	0	Firmicutes_A	Clostridia	Oscillospirales	Oscillospiraceae	CAG-170	CAG-170 sp900553545
BAG_77	BAG	BAG_b23097_1	19.6	2326580	0	60.2	3.45	FALSE	none	s		0	0	0	0	Firmicutes_A	Clostridia	Clostridiales	Clostridiaceae	Clostridium	Clostridium sp000435835
BAG_78	BAG	BAG_b33458_1	19.6	2243330	0	53.45	2.59	FALSE	none	t		0	0	0	0	Firmicutes_A	Clostridia	Clostridiales	Clostridiaceae	Clostridium	Clostridium sp900540255
BAG_79	BAG	BAG_b36356	19.4	2369264	0	58.01	0	FALSE	none			0	0	0	0	Firmicutes_A	Clostridia	Lachnospirales	Lachnospiraceae	Lachnospira	Lachnospira sp000437735
BAG_80	BAG	BAG_b5252	18.7	1986469	0	86.38	2.89	FALSE	none	f		0	0	0	0	Actinobacteriota	Coriobacteriia	Coriobacteriales	Eggerthellaceae	Ellagibacter	Ellagibacter isourolithinifaciens
BAG_81	BAG	BAG_b11877_1	18.5	2162918	0	82.65	1.06	FALSE	none			0	0	0	0	Firmicutes_A	Clostridia	Lachnospirales	Lachnospiraceae	Butyribacter	Butyribacter sp003529475
BAG_82	BAG	BAG_b23464_1	18.4	1938673	0	50	0	FALSE	none			0	0	0	0	Firmicutes_A	Clostridia	Lachnospirales	Lachnospiraceae	Enterocloster	Enterocloster sp900541315
BAG_83	BAG	BAG_b44378	18.1	2693477	0	91.98	1.02	FALSE	none			0	0	0	0	Verrucomicrobiota	Verrucomicrobiae	Verrucomicrobiales	Akkermansiaceae	Akkermansia	Akkermansia muciniphila_B
BAG_84	BAG	BAG_b17073_1	17.8	1438185	0	59.64	1.72	FALSE	none			0	0	0	0	Firmicutes_A	Clostridia	Oscillospirales	Butyricicoccaceae	Agathobaculum	Agathobaculum butyriciproducens
BAG_85	BAG	BAG_b13280	17.1	4251990	0	90.91	1.27	FALSE	none			0	0	0	0	Bacteroidota	Bacteroidia	Bacteroidales	Marinifilaceae	Butyricimonas	Butyricimonas faecihominis
BAG_86	BAG	BAG_b12473_1	17	2473563	0	74.23	2.59	FALSE	none			0	0	0	0	Firmicutes_A	Clostridia	Lachnospirales	Lachnospiraceae	Eubacterium_F	Eubacterium_F sp900539115
BAG_87	BAG	BAG_b4053_1	16.4	1006263	0	51.26	0.81	FALSE	none	s		0	0	0	0	Firmicutes	Bacilli	Lactobacillales	Streptococcaceae	Streptococcus	Streptococcus sp900766505
BAG_88	BAG	BAG_b12262_1	15.9	1296741	0	61.75	1.17	FALSE	none	s		0	0	0	0	Firmicutes_A	Clostridia	TANB77	CAG-508	CAG-269	CAG-269 sp001916065
BAG_89	BAG	BAG_b2133	15.6	1763115	0	56.57	2.63	FALSE	none	s		0	0	0	0	Firmicutes_A	Clostridia	Christensenellales	CAG-74	Ventricola	Ventricola sp900542395
BAG_90	BAG	BAG_b7715_1	13.8	3770573	0	62.41	0	FALSE	none			0	0	0	0	Bacteroidota	Bacteroidia	Bacteroidales	Tannerellaceae	Parabacteroides	Parabacteroides distasonis
BAG_91	BAG	BAG_b18179_1	13.4	1861628	0	63.76	5.17	FALSE	none	t		0	0	0	0	Firmicutes_A	Clostridia	Peptostreptococcales	Peptostreptococcaceae	Terrisporobacter	Terrisporobacter sp900557165
BAG_92	BAG	BAG_b33766_1	13.4	1281627	0	68.57	1.45	FALSE	none	s		0	0	0	0	Firmicutes_A	Clostridia	TANB77	CAG-508	CAG-245	CAG-245 sp000435175
BAG_93	BAG	BAG_b42015	13.1	1492985	0	71.18	3.1	FALSE	none	t		0	0	0	0	Firmicutes_A	Clostridia	Christensenellales	CAG-138	PeH17	PeH17 sp000435055
BAG_94	BAG	BAG_b49212	11.9	1621655	0	55.82	5.17	FALSE	none	q		0	0	0	0	Firmicutes_A	Clostridia	Oscillospirales	Oscillospiraceae	Faecousia	Faecousia sp000435995
BAG_95	BAG	BAG_b17617	11.4	1718498	0	53.71	0.59	FALSE	none	s		0	0	0	0	Desulfobacterota_I	Desulfovibrionia	Desulfovibrionales	Desulfovibrionaceae	Bilophila	Bilophila wadsworthia
BAG_96	BAG	BAG_b29632	11.4	1546523	0	55.24	0	FALSE	none			0	0	0	0	Firmicutes_A	Clostridia	Oscillospirales	CAG-272	UMGS1696	UMGS1696 sp900753285
BAH_1	BAH	BAH_b7332	828.3	3902739	2	80.49	1.72	TRUE	ok	a		0	0	0	0	Bacteroidota	Bacteroidia	Bacteroidales	Bacteroidaceae	Bacteroides	Bacteroides uniformis
BAH_2	BAH	BAH_b9857_1	630.1	3559173	3	91.79	0.37	TRUE	ok	l		15	17	0	0	Bacteroidota	Bacteroidia	Bacteroidales	Bacteroidaceae	Phocaeicola	Phocaeicola massiliensis
BAH_3	BAH	BAH_b17058	503.5	4752232	0	75.57	1.11	TRUE	too_many			0	0	0	0	Bacteroidota	Bacteroidia	Bacteroidales	Bacteroidaceae	Bacteroides	Bacteroides xylanisolvens
BAH_4	BAH	BAH_b17227_1	480.4	3431703	0	89.69	0	TRUE	too_many	f		0	0	0	0	Bacteroidota	Bacteroidia	Bacteroidales	Bacteroidaceae	Phocaeicola	Phocaeicola vulgatus
BAH_5	BAH	BAH_b23005_1	380.3	2532587	0	92.9	5.59	TRUE	too_many	s		0	0	0	0	Firmicutes_A	Clostridia	Lachnospirales	Lachnospiraceae	Agathobacter	Agathobacter faecis
BAH_6	BAH	BAH_b41923	305.6	1956153	3	97.01	0.96	TRUE	ok	i		29	4	0	0	Bacteroidota	Bacteroidia	Bacteroidales	Rikenellaceae	Alistipes	Alistipes putredinis
BAH_7	BAH	BAH_b24360_1	278.2	2835794	3	94.01	3.32	TRUE	ok	s		151	93	2	2	Firmicutes_A	Clostridia	Lachnospirales	Lachnospiraceae	Fusicatenibacter	Fusicatenibacter saccharivorans
BAH_8	BAH	BAH_b25085_1	263.6	3151185	2	95.4	2.46	TRUE	ok			1	1	0	0	Firmicutes_A	Clostridia	Lachnospirales	Lachnospiraceae	Acetatifactor	Acetatifactor sp900066565
BAH_9	BAH	BAH_b12216_1	251.5	2625192	3	93.74	1.61	TRUE	ok			14	12	0	0	Firmicutes_A	Clostridia	Lachnospirales	Lachnospiraceae	Agathobacter	Agathobacter rectalis
BAH_10	BAH	BAH_b47801_1	216.7	2529635	4	81.21	1.75	TRUE	ok	l		87	35	1	1	Firmicutes_A	Clostridia	Lachnospirales	Lachnospiraceae	Lachnospira	Lachnospira rogosae_A
BAH_11	BAH	BAH_b13307_1	207	2373715	3	65.95	0.88	TRUE	ok			5	6	0	0	Firmicutes_A	Clostridia	Lachnospirales	Lachnospiraceae	Roseburia	Roseburia inulinivorans
BAH_12	BAH	BAH_b19584	201.5	1984808	0	98.9	1.01	TRUE	none	a		0	0	0	0	Firmicutes_A	Clostridia	Oscillospirales	Acutalibacteraceae	Ruminococcus_E	Ruminococcus_E bromii_B
BAH_13	BAH	BAH_b13035_1	165.1	2504862	4	66.44	2.63	TRUE	ok	s		326	201	88	41	Firmicutes_A	Clostridia	Lachnospirales	Lachnospiraceae	Blautia_A	Blautia_A wexlerae
BAH_14	BAH	BAH_b40090_1	142.9	3277302	4	89.14	2.78	TRUE	ok	s		56	45	0	0	Firmicutes_A	Clostridia	Lachnospirales	Lachnospiraceae	Roseburia	Roseburia intestinalis
BAH_15	BAH	BAH_b11075_1	126.7	3489311	3	92.84	2.22	TRUE	ok	s		13	3	0	0	Firmicutes_A	Clostridia	Lachnospirales	Lachnospiraceae	KLE1615	KLE1615 sp900066985
BAH_16	BAH	BAH_b8478	125.8	2806920	0	92.71	0.5	TRUE	none	l		0	0	0	0	Bacteroidota	Bacteroidia	Bacteroidales	Rikenellaceae	Alistipes	Alistipes onderdonkii
BAH_17	BAH	BAH_b9274	120.9	2135173	0	87.74	2.28	TRUE	none	a		0	0	0	0	Firmicutes_A	Clostridia	Oscillospirales	Ruminococcaceae	Gemmiger	Gemmiger formicilis
BAH_18	BAH	BAH_b18920_1	119.5	2222042	2	58.77	3.51	FALSE	ok			63	44	0	0	Firmicutes_A	Clostridia	Lachnospirales	Lachnospiraceae	Dorea_A	Dorea_A longicatena
BAH_19	BAH	BAH_b17719_1	116.3	2257053	3	81.19	4.31	FALSE	ok	s		5	5	0	0	Firmicutes_A	Clostridia	Lachnospirales	Lachnospiraceae	Mediterraneibacter	Mediterraneibacter faecis
BAH_20	BAH	BAH_b7050_1	104.5	2509545	0	95.04	1.01	TRUE	none	s		0	0	0	0	Firmicutes_A	Clostridia	Lachnospirales	Lachnospiraceae	Lachnospira	Lachnospira eligens_A
BAH_21	BAH	BAH_b28093	99	2464423	2	64.91	0	FALSE	ok			7	5	0	0	Firmicutes_A	Clostridia	Lachnospirales	Lachnospiraceae	Eubacterium_I	Eubacterium_I sp900546495
BAH_22	BAH	BAH_b33708	92.4	2074058	0	94.84	0.19	TRUE	none	a		0	0	0	0	Firmicutes_A	Clostridia	Oscillospirales	Oscillospiraceae	ER4	ER4 sp000765235
BAH_23	BAH	BAH_b16798_1	91.6	3048174	2	94.38	2.01	FALSE	ok	s		43	35	0	0	Firmicutes_A	Clostridia	Lachnospirales	Lachnospiraceae	Anaerostipes	Anaerostipes hadrus
BAH_24	BAH	BAH_b18746	85.2	2072084	0	93.86	1.68	FALSE	none	a		0	0	0	0	Firmicutes_A	Clostridia	Oscillospirales	Butyricicoccaceae	Agathobaculum	Agathobaculum sp003481705
BAH_25	BAH	BAH_b27400	83.2	1981203	0	91.21	1.61	FALSE	none	a		0	0	0	0	Firmicutes_A	Clostridia	Oscillospirales	Oscillospiraceae	CAG-103	CAG-103 sp900757655
BAH_26	BAH	BAH_b6879_1	80.9	3164920	0	92.96	0.47	FALSE	none	s		0	0	0	0	Firmicutes_A	Clostridia	Lachnospirales	Lachnospiraceae	Butyribacter	Butyribacter intestini
BAH_27	BAH	BAH_b8505_1	79	1825604	3	55.6	1.75	FALSE	ok			12	12	0	0	Firmicutes_A	Clostridia	Lachnospirales	Lachnospiraceae	Blautia_A	Blautia_A obeum
BAH_28	BAH	BAH_b6058_1	77.3	2255959	3	84.55	0.69	FALSE	ok			37	35	0	0	Firmicutes_A	Clostridia	Lachnospirales	Lachnospiraceae	Eisenbergiella	Eisenbergiella sp900066775
BAH_29	BAH	BAH_b9612_1	74.4	2751689	0	91.26	1.61	FALSE	none	s		0	0	0	0	Firmicutes_A	Clostridia	Lachnospirales	Lachnospiraceae	Roseburia	Roseburia hominis
BAH_30	BAH	BAH_b5495_1	73.3	3088042	0	94.38	1.51	FALSE	none	s		0	0	0	0	Firmicutes_A	Clostridia	Lachnospirales	Lachnospiraceae	CAG-882	CAG-882 sp003486385
BAH_31	BAH	BAH_b3982_1	60.5	2467906	0	84.68	2.48	FALSE	none	s		0	0	0	0	Firmicutes_A	Clostridia	Lachnospirales	Lachnospiraceae	Copromonas	Copromonas sp900066535
BAH_32	BAH	BAH_b4270_1	59.6	2181189	0	66.14	3.51	FALSE	none			0	0	0	0	Firmicutes_A	Clostridia	Lachnospirales	Lachnospiraceae	Blautia_A	Blautia_A massiliensis
BAH_33	BAH	BAH_b40675_1	59.4	2593229	3	99.06	0	FALSE	ok	f		2	2	0	0	Firmicutes	Bacilli	Erysipelotrichales	Coprobacillaceae	Faecalibacillus	Faecalibacillus intestinalis
BAH_34	BAH	BAH_b36612_1	57.8	2615078	0	91.05	0.79	FALSE	none	s		0	0	0	0	Firmicutes_A	Clostridia	Lachnospirales	Lachnospiraceae	UMGS1375	UMGS1375 sp900066615
BAH_35	BAH	BAH_b9166_1	56.4	2400751	0	87.04	1.56	FALSE	none	f		0	0	0	0	Actinobacteriota	Coriobacteriia	Coriobacteriales	Eggerthellaceae	Adlercreutzia	Adlercreutzia equolifaciens
BAH_36	BAH	BAH_b10722	54.1	2301420	0	98.11	0	FALSE	none	a		0	0	0	0	Firmicutes_A	Clostridia	Oscillospirales	Acutalibacteraceae	UBA1417	UBA1417 sp003531055
BAH_37	BAH	BAH_b28066_2	53.2	2138666	0	72.9	1.72	FALSE	none	s		0	0	0	0	Firmicutes_A	Clostridia	Lachnospirales	Lachnospiraceae	Mediterraneibacter	Mediterraneibacter lactaris
BAH_38	BAH	BAH_b46780_1	50.7	1869288	0	89.5	2.01	FALSE	none	a		0	0	0	0	Firmicutes_A	Clostridia	Oscillospirales	Oscillospiraceae	CAG-83	CAG-83 sp000431575
BAH_39	BAH	BAH_b6810	50.6	1417990	0	63.92	0.08	FALSE	none	t		0	0	0	0	Firmicutes_C	Negativicutes	Veillonellales	Dialisteraceae	Dialister	Dialister invisus
BAH_40	BAH	BAH_b6751	49.8	2301892	0	91.73	1.69	FALSE	none	s		0	0	0	0	Firmicutes_A	Clostridia	Lachnospirales	Lachnospiraceae	AM51-8	AM51-8 sp003478275
BAH_41	BAH	BAH_b22310_1	49	2166047	2	88.13	3.06	FALSE	ok	a		2	1	0	0	Firmicutes_A	Clostridia	Oscillospirales	Ruminococcaceae	Gemmiger	Gemmiger qucibialis
BAH_42	BAH	BAH_b11764_1	48	2597224	0	60.32	3.51	FALSE	none			0	0	0	0	Firmicutes_A	Clostridia	Lachnospirales	Lachnospiraceae	Blautia_A	Blautia_A sp000436615
BAH_43	BAH	BAH_b22869_1	44.2	2418884	0	51.04	0	FALSE	none			0	0	0	0	Firmicutes_A	Clostridia	Lachnospirales	Lachnospiraceae	Eubacterium_I	Eubacterium_I ramulus
BAH_44	BAH	BAH_b34757_1	39.6	2817117	0	97.99	2.01	FALSE	none	m		0	0	0	0	Firmicutes_A	Clostridia	Oscillospirales	Acutalibacteraceae	Fimivicinus	Fimivicinus sp900544375
BAH_45	BAH	BAH_b13725	39.3	2187101	0	91.75	2.44	FALSE	none	s		0	0	0	0	Firmicutes_A	Clostridia	Lachnospirales	Lachnospiraceae	UBA11774	UBA11774 sp003507655
BAH_46	BAH	BAH_b18595_1	38.6	2354451	0	70.13	1.75	FALSE	none	s		0	0	0	0	Firmicutes_A	Clostridia	Lachnospirales	Lachnospiraceae	Dorea	Dorea formicigenerans
BAH_47	BAH	BAH_b10159_1	36.3	3149045	2	85.47	1.58	FALSE	ok			1	1	0	0	Firmicutes_A	Clostridia	Lachnospirales	Lachnospiraceae	Enterocloster	Enterocloster sp000431375
BAH_48	BAH	BAH_b28667_1	35.4	2699393	0	88.56	4.19	FALSE	none			0	0	0	0	Firmicutes_A	Clostridia	Lachnospirales	Lachnospiraceae	Anaerobutyricum	Anaerobutyricum hallii
BAH_49	BAH	BAH_b7494_1	34.9	3257399	0	93.05	6.32	FALSE	none	s		0	0	0	0	Firmicutes_A	Clostridia	Lachnospirales	Lachnospiraceae	COE1	COE1 sp001916965
BAH_50	BAH	BAH_b37924_1	34.4	2641221	0	76.99	3.51	FALSE	none	s		0	0	0	0	Firmicutes_A	Clostridia	Lachnospirales	Lachnospiraceae	Oliverpabstia	Oliverpabstia intestinalis
BAH_51	BAH	BAH_b12954_1	33.8	2426504	0	75.6	3.51	FALSE	none	s		0	0	0	0	Firmicutes_A	Clostridia	Lachnospirales	Lachnospiraceae	RUG115	RUG115 sp900066395
BAH_52	BAH	BAH_b16702	32.8	2629759	0	96.64	2.03	FALSE	none	a		0	0	0	0	Firmicutes_A	Clostridia	UBA1381	UBA1381	CAG-41	CAG-41 sp900066215
BAH_53	BAH	BAH_b13515_1	32.3	2406695	0	63.51	1.75	FALSE	none	s		0	0	0	0	Firmicutes_A	Clostridia	Lachnospirales	Lachnospiraceae	Lachnospira	Lachnospira sp000436475
BAH_54	BAH	BAH_b17916_1	31.4	2647040	0	96.58	0.02	FALSE	none	a		0	0	0	0	Firmicutes_A	Clostridia	Oscillospirales	Ruminococcaceae	Ruminococcus_D	Ruminococcus_D bicirculans
BAH_55	BAH	BAH_b5119_1	30.7	2450337	0	98.99	1.14	FALSE	none	a		0	0	0	0	Firmicutes_A	Clostridia	Oscillospirales	Ruminococcaceae	UBA1394	UBA1394 sp900538575
BAH_56	BAH	BAH_b578_1	30.4	2246399	0	81.76	1.85	FALSE	none	s		0	0	0	0	Firmicutes_A	Clostridia	Lachnospirales	Lachnospiraceae	Bariatricus	Bariatricus comes
BAH_57	BAH	BAH_b9682	29.6	2183270	0	91.19	6.74	FALSE	none	s		0	0	0	0	Actinobacteriota	Actinomycetia	Actinomycetales	Bifidobacteriaceae	Bifidobacterium	Bifidobacterium longum
BAH_58	BAH	BAH_b21174_1	28.5	2705909	0	91.79	1.68	FALSE	none	s		0	0	0	0	Firmicutes_A	Clostridia	Lachnospirales	Lachnospiraceae	Butyribacter	Butyribacter sp003524945
BAH_59	BAH	BAH_b17148_1	25.1	2455272	0	76.6	4.39	FALSE	none	s		0	0	0	0	Firmicutes_A	Clostridia	Lachnospirales	Lachnospiraceae	Eubacterium_G	Eubacterium_G sp000434315
BAH_60	BAH	BAH_b3226_1	24.5	2005693	0	94.23	1.48	FALSE	none			0	0	0	0	Actinobacteriota	Actinomycetia	Actinomycetales	Bifidobacteriaceae	Bifidobacterium	Bifidobacterium pseudocatenulatum
BAH_61	BAH	BAH_b46841_1	22.8	1791781	0	88.94	1.51	FALSE	none	a		0	0	0	0	Firmicutes_A	Clostridia	Oscillospirales	Oscillospiraceae	Dysosmobacter	Dysosmobacter sp900542115
BAH_62	BAH	BAH_b8493_1	22.3	2666169	0	75.06	0.88	FALSE	none			0	0	0	0	Firmicutes_A	Clostridia	Lachnospirales	Lachnospiraceae	Blautia	Blautia stercoris
BAH_63	BAH	BAH_b42147_1	22.2	2665074	0	94.28	1.01	FALSE	none	s		0	0	0	0	Firmicutes_A	Clostridia	Lachnospirales	Lachnospiraceae	Eubacterium_F	Eubacterium_F sp003491505
BAH_64	BAH	BAH_b23164_1	18.9	2588838	0	88.8	2.01	FALSE	none	s		0	0	0	0	Firmicutes_A	Clostridia	Lachnospirales	Lachnospiraceae	Coprococcus_A	Coprococcus_A sp900548825
BAH_65	BAH	BAH_b26819_1	17.8	1969233	0	84.04	1.68	FALSE	none			0	0	0	0	Firmicutes_A	Clostridia	Oscillospirales	Oscillospiraceae	Faecousia	Faecousia sp003525905
BAH_66	BAH	BAH_b23880_1	17.4	2127729	0	74.59	2.22	FALSE	none			0	0	0	0	Firmicutes_A	Clostridia	Lachnospirales	Lachnospiraceae	Clostridium_Q	Clostridium_Q fessum
BAH_67	BAH	BAH_b40590_1	16.7	2276562	0	66.28	5.4	FALSE	none			0	0	0	0	Firmicutes_A	Clostridia	Lachnospirales	Lachnospiraceae	Ventrimonas	Ventrimonas sp003478505
BAH_68	BAH	BAH_b8019_1	16.7	2538409	0	59.6	0	FALSE	none			0	0	0	0	Firmicutes_A	Clostridia	Lachnospirales	Lachnospiraceae	Marvinbryantia	Marvinbryantia sp900066075
BAH_69	BAH	BAH_b2083_1	15.6	1227595	0	57.99	1.79	FALSE	none	i		0	0	0	0	Firmicutes	Bacilli	Lactobacillales	Streptococcaceae	Streptococcus	Streptococcus sp900766505
BAH_70	BAH	BAH_b35595	15	1100287	0	54.48	5.17	FALSE	none			0	0	0	0	Firmicutes	Bacilli	Lactobacillales	Streptococcaceae	Streptococcus	Streptococcus thermophilus
BAH_71	BAH	BAH_b5554	14.9	2306636	0	85.45	6.38	FALSE	none			0	0	0	0	Firmicutes_A	Clostridia	Oscillospirales	Oscillospiraceae	Lawsonibacter	Lawsonibacter asaccharolyticus
BAH_72	BAH	BAH_b2562	14.8	1820286	0	93.12	0.67	FALSE	none	s		0	0	0	0	Firmicutes_A	Clostridia	Lachnospirales	Anaerotignaceae	Anaerotignum	Anaerotignum faecicola
BAH_73	BAH	BAH_b7463_1	14.8	2222920	0	50.66	0.86	FALSE	none			0	0	0	0	Firmicutes_A	Clostridia	Lachnospirales	Lachnospiraceae	Ruminococcus_B	Ruminococcus_B gnavus
BAH_74	BAH	BAH_b33434_1	14.7	2191663	2	72.89	1.75	FALSE	ok	s		1	1	0	0	Firmicutes_A	Clostridia	Lachnospirales	Lachnospiraceae	Eubacterium_G	Eubacterium_G sp000435815
BAH_75	BAH	BAH_b2879_1	13.5	2777539	0	57.48	3.57	FALSE	none			0	0	0	0	Actinobacteriota	Coriobacteriia	Coriobacteriales	Eggerthellaceae	Eggerthella	Eggerthella lenta
BAH_76	BAH	BAH_b36534_1	12.7	3860206	0	69.11	5.17	FALSE	none			0	0	0	0	Bacteroidota	Bacteroidia	Bacteroidales	Tannerellaceae	Parabacteroides	Parabacteroides johnsonii
BAH_77	BAH	BAH_b21274_1	11.5	3738994	0	87.29	2.78	FALSE	none	s		0	0	0	0	Bacteroidota	Bacteroidia	Bacteroidales	Marinifilaceae	Odoribacter	Odoribacter splanchnicus
BAH_78	BAH	BAH_b17532	10.6	2534120	0	69.16	1.34	FALSE	none	a		0	0	0	0	Firmicutes_A	Clostridia	Oscillospirales	Acutalibacteraceae	UMGS856	UMGS856 sp900546265
BAH_79	BAH	BAH_b12742	10.2	3843107	0	63.95	6.9	FALSE	none	t		0	0	0	0	Proteobacteria	Gammaproteobacteria	Enterobacterales	Enterobacteriaceae	Citrobacter	Citrobacter freundii
BAH_80	BAH	BAH_b3197	9.9	1996304	0	58.07	0	FALSE	none			0	0	0	0	Firmicutes_A	Clostridia	Oscillospirales	Oscillospiraceae	HGM13006	HGM13006 sp900757695
BAH_81	BAH	BAH_b32979	9.7	1740178	0	67.31	2.07	FALSE	none			0	0	0	0	Firmicutes_A	Clostridia	Oscillospirales	Oscillospiraceae	Faecousia	Faecousia sp000435995
BAI_1	BAI	BAI_b62024_1	1798.1	3759894	7	82.68	0.19	TRUE	ok	f		79	64	0	0	Bacteroidota	Bacteroidia	Bacteroidales	Bacteroidaceae	Phocaeicola	Phocaeicola vulgatus
BAI_2	BAI	BAI_b60842_1	746.6	1466203	4	75.28	0.67	TRUE	ok			14	11	0	0	Firmicutes_A	Clostridia	Oscillospirales	Oscillospiraceae	CAG-83	CAG-83 sp001916855
BAI_3	BAI	BAI_b4583_1	621.1	1346413	2	61.36	0	TRUE	ok			89	6	0	0	Firmicutes_A	Clostridia	Oscillospirales	Ruminococcaceae	Gemmiger	Gemmiger formicilis
BAI_4	BAI	BAI_b4096_2	584.2	5745372	3	67.74	0	FALSE	ok	s		3	3	0	0	Bacteroidota	Bacteroidia	Bacteroidales	Bacteroidaceae	Bacteroides	Bacteroides thetaiotaomicron
BAI_5	BAI	BAI_b23415_1	393.8	2508865	5	95.35	1.17	TRUE	ok	l		9	6	0	0	Firmicutes_A	Clostridia	Lachnospirales	Lachnospiraceae	Lachnospira	Lachnospira rogosae_A
BAI_6	BAI	BAI_b11246	294.6	2371523	3	96.95	0.84	FALSE	ok	s		7	7	1	1	Firmicutes_A	Clostridia	Lachnospirales	Lachnospiraceae	Coprococcus	Coprococcus sp900066115
BAI_7	BAI	BAI_b12385_1	287.9	2737850	4	91.83	2.53	TRUE	ok	s		10	7	0	0	Firmicutes_A	Clostridia	Lachnospirales	Lachnospiraceae	Fusicatenibacter	Fusicatenibacter saccharivorans
BAI_8	BAI	BAI_b13960_1	286.7	3315701	2	91.93	0.99	TRUE	ok			2	2	0	0	Bacteroidota	Bacteroidia	Bacteroidales	Bacteroidaceae	Bacteroides	Bacteroides stercoris
BAI_9	BAI	BAI_b9715_1	283.8	2476380	5	85.6	2.66	TRUE	ok			16	15	0	0	Firmicutes_A	Clostridia	Lachnospirales	Lachnospiraceae	Acetatifactor	Acetatifactor sp900066565
BAI_10	BAI	BAI_b33471_1	270.7	2470945	0	92.77	0.96	TRUE	none			0	0	0	0	Bacteroidota	Bacteroidia	Bacteroidales	Rikenellaceae	Alistipes	Alistipes shahii
BAI_11	BAI	BAI_b325_1	264.3	2752390	3	95.1	3.86	TRUE	ok			5	5	0	0	Bacteroidota	Bacteroidia	Bacteroidales	Rikenellaceae	Alistipes	Alistipes onderdonkii
BAI_12	BAI	BAI_b26208	249.8	2355765	2	99.52	0.16	TRUE	ok	s		8	12	0	0	Bacteroidota	Bacteroidia	Bacteroidales	Rikenellaceae	Tidjanibacter	Tidjanibacter inops_A
BAI_13	BAI	BAI_b3171_1	234	2307945	0	71.66	1.75	FALSE	too_many	s		0	0	0	0	Firmicutes_A	Clostridia	Lachnospirales	Lachnospiraceae	Blautia_A	Blautia_A massiliensis
BAI_14	BAI	BAI_b28222	232.4	2097429	3	85.77	0.06	FALSE	ok	a		2	3	1	1	Firmicutes_A	Clostridia	Oscillospirales	Ruminococcaceae	Ruminococcus_C	Ruminococcus_C sp000980705
BAI_15	BAI	BAI_b5125_1	204	4583549	2	97.71	0.13	TRUE	ok	l		1	1	0	0	Bacteroidota	Bacteroidia	Bacteroidales	Tannerellaceae	Parabacteroides	Parabacteroides distasonis
BAI_16	BAI	BAI_b24873_1	201.7	2507042	2	90.59	2.35	TRUE	ok	a		6	6	0	0	Firmicutes_A	Clostridia	Oscillospirales	Oscillospiraceae	CAG-170	CAG-170 sp000432135
BAI_17	BAI	BAI_b54059_1	191.7	1942312	2	96.35	0	TRUE	ok	a		3	2	0	0	Firmicutes_A	Clostridia	Oscillospirales	Acutalibacteraceae	Eubacterium_R	Eubacterium_R sp000436835
BAI_18	BAI	BAI_b9354	188.6	1782653	2	90.02	0.34	FALSE	ok	a		2	2	0	0	Firmicutes_A	Clostridia	Oscillospirales	Oscillospiraceae	CAG-103	CAG-103 sp000432375
BAI_19	BAI	BAI_b8437_1	172.6	2309218	3	88.17	3.86	FALSE	ok	s		137	67	6	4	Firmicutes_A	Clostridia	Lachnospirales	Lachnospiraceae	Anaerostipes	Anaerostipes hadrus
BAI_20	BAI	BAI_b23754_1	168.2	3493352	3	93.81	2.69	FALSE	ok	s		7	6	0	0	Firmicutes_A	Clostridia	Lachnospirales	Lachnospiraceae	KLE1615	KLE1615 sp900066985
BAI_21	BAI	BAI_b3899_1	165.1	2700634	3	82.55	0	TRUE	ok	s	s->l	7	6	2	2	Firmicutes_A	Clostridia	Lachnospirales	Lachnospiraceae	Lachnospira	Lachnospira eligens_A
BAI_22	BAI	BAI_b62616	161.2	2030341	2	92.83	2.03	TRUE	ok	a		1	1	0	0	Firmicutes_A	Clostridia	Oscillospirales	Oscillospiraceae	ER4	ER4 sp000765235
BAI_23	BAI	BAI_b33554_1	161.1	1231714	2	92.42	2.25	FALSE	ok	s		2	2	0	0	Firmicutes	Bacilli	RF39	UBA660	Aphodocola	Aphodocola sp000434835
BAI_24	BAI	BAI_b51901_1	147.5	2709244	3	78.92	5.17	FALSE	ok	s		8	1	0	0	Firmicutes_A	Clostridia	Lachnospirales	Lachnospiraceae	Agathobacter	Agathobacter faecis
BAI_25	BAI	BAI_b8345	145.4	2529954	0	95.57	0.67	FALSE	none	s		0	0	0	0	Firmicutes_A	Clostridia	Lachnospirales	Lachnospiraceae	CAG-127	CAG-127 sp900319515
BAI_26	BAI	BAI_b7943_1	143	2677142	0	94.67	1.34	FALSE	none	s		0	0	0	0	Firmicutes_A	Clostridia	Lachnospirales	Lachnospiraceae	CAG-303	CAG-303 sp000437755
BAI_27	BAI	BAI_b14071_1	136.3	2988729	0	94.86	3.94	FALSE	none	s		0	0	0	0	Firmicutes_A	Clostridia	Lachnospirales	Lachnospiraceae	Anaerobutyricum	Anaerobutyricum hallii
BAI_28	BAI	BAI_b17235_1	132.8	2559321	2	97.26	0.68	FALSE	ok	a		9	3	0	0	Firmicutes_A	Clostridia	Oscillospirales	Ruminococcaceae	Ruminococcus_D	Ruminococcus_D bicirculans
BAI_29	BAI	BAI_b36117_1	130.3	2495546	0	91.79	0.34	FALSE	none	l		0	0	0	0	Firmicutes_A	Clostridia	Oscillospirales	Oscillospiraceae	Dysosmobacter	Dysosmobacter sp001916835
BAI_30	BAI	BAI_b7170	127	2475645	2	93.23	1.34	FALSE	ok	f		2	1	0	0	Firmicutes_A	Clostridia	Lachnospirales	Lachnospiraceae	Lachnospira	Lachnospira sp900316325
BAI_31	BAI	BAI_b20587	126.9	1325953	0	92.13	4.65	FALSE	none	s		0	0	0	0	Firmicutes	Bacilli	RF39	UBA660	CAG-417	CAG-417 sp000432835
BAI_32	BAI	BAI_b67850_1	120	2114635	0	58.05	0	FALSE	none	s		0	0	0	0	Firmicutes_A	Clostridia	Lachnospirales	Lachnospiraceae	Roseburia	Roseburia inulinivorans
BAI_33	BAI	BAI_b65375_1	105.9	2423744	2	51.36	1.75	FALSE	ok			2	2	1	1	Firmicutes_A	Clostridia	Lachnospirales	Lachnospiraceae	Blautia_A	Blautia_A faecis
BAI_34	BAI	BAI_b13278_1	104.2	2424646	0	92.69	5.43	FALSE	none	s		0	0	0	0	Firmicutes_A	Clostridia	Lachnospirales	Lachnospiraceae	RUG115	RUG115 sp900066395
BAI_35	BAI	BAI_b18693_1	102.7	2631481	2	77.51	1.75	TRUE	ok	s		55	16	0	0	Firmicutes_A	Clostridia	Lachnospirales	Lachnospiraceae	Agathobacter	Agathobacter rectalis
BAI_36	BAI	BAI_b41243_1	102.6	5001938	0	71.9	1.72	FALSE	none			0	0	0	0	Bacteroidota	Bacteroidia	Bacteroidales	Bacteroidaceae	Bacteroides	Bacteroides salyersiae
BAI_37	BAI	BAI_b20606_1	98.9	2484165	0	73.92	3.45	FALSE	none			0	0	0	0	Firmicutes_A	Clostridia	Lachnospirales	Lachnospiraceae	Mediterraneibacter	Mediterraneibacter faecis
BAI_38	BAI	BAI_b28824	94.8	2150061	0	88.97	3.24	FALSE	none			0	0	0	0	Firmicutes_A	Clostridia	Oscillospirales	Oscillospiraceae	Evtepia	Evtepia excrementipullorum
BAI_39	BAI	BAI_b40301_1	90.3	2102380	2	79.47	2.63	FALSE	ok	s		3	2	0	0	Firmicutes_A	Clostridia	Lachnospirales	Lachnospiraceae	UBA11774	UBA11774 sp003507655
BAI_40	BAI	BAI_b2237_1	88.6	2704822	2	96.83	2.45	FALSE	ok	s		1	1	0	0	Firmicutes_A	Clostridia	Lachnospirales	Lachnospiraceae	Butyribacter	Butyribacter sp003529475
BAI_41	BAI	BAI_b22327_1	88.5	2634382	0	97.32	1.01	FALSE	none	a		0	0	0	0	Firmicutes_A	Clostridia	UBA1381	UBA1381	CAG-41	CAG-41 sp900066215
BAI_42	BAI	BAI_b20009	87.2	2829983	0	93.2	0.68	FALSE	none			0	0	0	0	Verrucomicrobiota	Verrucomicrobiae	Verrucomicrobiales	Akkermansiaceae	Akkermansia	Akkermansia sp001580195
BAI_43	BAI	BAI_b19122	85.8	2146313	2	97.44	0	FALSE	ok	a		12	2	0	0	Firmicutes_A	Clostridia	Oscillospirales	Acutalibacteraceae	Ruminococcus_E	Ruminococcus_E sp900314705
BAI_44	BAI	BAI_b25151_1	85.8	2016318	0	87.13	0.22	FALSE	none			0	0	0	0	Firmicutes_A	Clostridia	Oscillospirales	Oscillospiraceae	Faecousia	Faecousia sp003525905
BAI_45	BAI	BAI_b22715	78.3	2441851	2	88.14	2.8	FALSE	ok			3	4	2	3	Actinobacteriota	Coriobacteriia	Coriobacteriales	Eggerthellaceae	Adlercreutzia	Adlercreutzia celatus_A
BAI_46	BAI	BAI_b20238_1	77.6	2270902	2	98.04	1.7	FALSE	ok	a		1	2	0	0	Firmicutes_A	Clostridia	Oscillospirales	Butyricicoccaceae	Agathobaculum	Agathobaculum butyriciproducens
BAI_47	BAI	BAI_b9419_1	68.6	2743948	0	90.33	5.77	FALSE	none			0	0	0	0	Firmicutes_A	Clostridia	Lachnospirales	Lachnospiraceae	Eubacterium_I	Eubacterium_I ramulus
BAI_48	BAI	BAI_b14944_1	66.9	2086153	2	73.75	5.17	FALSE	ok	s		4	2	0	0	Firmicutes_A	Clostridia	Lachnospirales	Lachnospiraceae	Mediterraneibacter	Mediterraneibacter lactaris
BAI_49	BAI	BAI_b41258_1	65.5	2707018	0	55.77	0	FALSE	none			0	0	0	0	Firmicutes_A	Clostridia	Lachnospirales	Lachnospiraceae	Blautia_A	Blautia_A sp000436615
BAI_50	BAI	BAI_b48244_1	61.7	4701819	0	90.58	1.55	FALSE	none	s		0	0	0	0	Bacteroidota	Bacteroidia	Bacteroidales	Bacteroidaceae	Bacteroides	Bacteroides fragilis
BAI_51	BAI	BAI_b32282	61.2	2172036	0	68.18	1.79	FALSE	none	a		0	0	0	0	Firmicutes_A	Clostridia	Oscillospirales	Ruminococcaceae	Gemmiger	Gemmiger qucibialis
BAI_52	BAI	BAI_b60070_1	60.7	3279454	0	75.92	4.39	FALSE	none	s		0	0	0	0	Firmicutes_A	Clostridia	Lachnospirales	Lachnospiraceae	Roseburia	Roseburia intestinalis
BAI_53	BAI	BAI_b3774	59.7	1251030	0	89.33	0.56	FALSE	none	s		0	0	0	0	Firmicutes	Bacilli	RF39	UBA660	UMGS995	UMGS995 sp900547465
BAI_54	BAI	BAI_b6755_1	59.3	2540529	0	91.3	3.46	FALSE	none	s		0	0	0	0	Firmicutes_A	Clostridia	Lachnospirales	Lachnospiraceae	Dorea	Dorea formicigenerans
BAI_55	BAI	BAI_b51708	58.2	2358901	0	100	1.7	FALSE	none	i		0	0	0	0	Firmicutes_C	Negativicutes	Acidaminococcales	Acidaminococcaceae	Phascolarctobacterium	Phascolarctobacterium faecium
BAI_56	BAI	BAI_b9460_1	58.2	2257011	0	62.41	3.45	FALSE	none			0	0	0	0	Firmicutes_A	Clostridia	Oscillospirales	Oscillospiraceae	Dysosmobacter	Dysosmobacter welbionis
BAI_57	BAI	BAI_b31632_1	55.1	2459637	0	93	6.54	FALSE	none	s		0	0	0	0	Firmicutes_A	Clostridia	Lachnospirales	Lachnospiraceae	Bariatricus	Bariatricus comes
BAI_58	BAI	BAI_b22525_1	52.4	1869933	0	52.95	1.75	FALSE	none			0	0	0	0	Firmicutes_A	Clostridia	Lachnospirales	Lachnospiraceae	Blautia_A	Blautia_A wexlerae
BAI_59	BAI	BAI_b37348	50.4	1581469	0	99.19	0.19	FALSE	none	i		0	0	0	0	Actinobacteriota	Coriobacteriia	Coriobacteriales	Eggerthellaceae	CAG-1427	CAG-1427 sp000435675
BAI_60	BAI	BAI_b39698	49.8	3013300	0	82.06	8.36	FALSE	none			0	0	0	0	Actinobacteriota	Coriobacteriia	Coriobacteriales	Eggerthellaceae	Eggerthella	Eggerthella lenta
BAI_61	BAI	BAI_b10276_1	46.8	2308155	0	91.38	1.2	FALSE	none	q		0	0	0	0	Firmicutes_A	Clostridia	Oscillospirales	Oscillospiraceae	Faecousia	Faecousia sp000434635
BAI_62	BAI	BAI_b43195_1	46.4	2854110	0	91.32	1.26	FALSE	none	s		0	0	0	0	Firmicutes_A	Clostridia	Lachnospirales	Lachnospiraceae	Roseburia	Roseburia hominis
BAI_63	BAI	BAI_b51861_1	46	2630393	0	98.8	0.06	FALSE	none	s		0	0	0	0	Firmicutes_A	Clostridia	Lachnospirales	Lachnospiraceae	Eubacterium_F	Eubacterium_F sp003491505
BAI_64	BAI	BAI_b2247_1	44.7	1776415	0	95.7	0	FALSE	none	s		0	0	0	0	Proteobacteria	Alphaproteobacteria	RF32	CAG-239	Scatocola	Scatocola faecipullorum
BAI_65	BAI	BAI_b26861_1	43.3	2543722	2	73.3	0	FALSE	ok	s		2	1	0	0	Firmicutes_A	Clostridia	Lachnospirales	Lachnospiraceae	Agathobacter	Agathobacter sp905209075
BAI_66	BAI	BAI_b579_1	43.3	2182621	0	50.03	1.75	FALSE	none			0	0	0	0	Firmicutes_A	Clostridia	Lachnospirales	Lachnospiraceae	Dorea_A	Dorea_A longicatena
BAI_67	BAI	BAI_b24783_1	41	2455953	0	71.05	1.75	FALSE	none	s		0	0	0	0	Firmicutes_A	Clostridia	Lachnospirales	Lachnospiraceae	Oliverpabstia	Oliverpabstia intestinalis
BAI_68	BAI	BAI_b52142_1	37.1	3102735	0	75.29	2.42	FALSE	none	l		0	0	0	0	Actinobacteriota	Coriobacteriia	Coriobacteriales	Eggerthellaceae	Gordonibacter	Gordonibacter pamelaeae
BAI_69	BAI	BAI_b24359_1	33.1	2213625	0	88.69	2.34	FALSE	none	s		0	0	0	0	Firmicutes_A	Clostridia	Lachnospirales	Lachnospiraceae	Mediterraneibacter	Mediterraneibacter torques
BAI_70	BAI	BAI_b18330_1	31.1	2377023	0	69.01	3.45	FALSE	none	a		0	0	0	0	Firmicutes_A	Clostridia	Oscillospirales	Oscillospiraceae	Lawsonibacter	Lawsonibacter asaccharolyticus
BAI_71	BAI	BAI_b11088_1	30.8	2518472	0	74.53	2.63	FALSE	none	s		0	0	0	0	Firmicutes_A	Clostridia	Lachnospirales	Lachnospiraceae	UMGS1375	UMGS1375 sp900066615
BAI_72	BAI	BAI_b16151_1	30.5	2082647	0	96.07	1.68	FALSE	none	a		0	0	0	0	Firmicutes_A	Clostridia	Oscillospirales	Ruminococcaceae	Negativibacillus	Negativibacillus sp000435195
BAI_73	BAI	BAI_b26473	29	3915284	0	99.64	0.59	FALSE	none	s		0	0	0	0	Desulfobacterota_I	Desulfovibrionia	Desulfovibrionales	Desulfovibrionaceae	Bilophila	Bilophila wadsworthia
BAI_74	BAI	BAI_b2171_1	28.2	2691796	0	89.11	3.48	FALSE	none	t		0	0	0	0	Firmicutes_A	Clostridia	Lachnospirales	Lachnospiraceae	Copromonas	Copromonas sp000435795
BAI_75	BAI	BAI_b2514_1	28.2	2777949	0	95.17	7.23	FALSE	none	s		0	0	0	0	Firmicutes_A	Clostridia	Peptostreptococcales	Peptostreptococcaceae	Romboutsia	Romboutsia timonensis
BAI_76	BAI	BAI_b3166_1	27.9	2891266	0	86.19	2.55	FALSE	none			0	0	0	0	Firmicutes_A	Clostridia	Oscillospirales	Ruminococcaceae	Ruthenibacterium	Ruthenibacterium lactatiformans
BAI_77	BAI	BAI_b14819_1	27.6	1633864	0	76.55	2.37	FALSE	none	s		0	0	0	0	Firmicutes_A	Clostridia	TANB77	CAG-508	CAG-492	CAG-492 sp000434335
BAI_78	BAI	BAI_b18943_1	27.4	3224687	0	71.93	1.75	FALSE	none	s		0	0	0	0	Firmicutes_A	Clostridia	Lachnospirales	Lachnospiraceae	Limivivens	Limivivens sp900543575
BAI_79	BAI	BAI_b2703_1	27.2	1763744	0	97.55	1.61	FALSE	none	t		0	0	0	0	Firmicutes_A	Clostridia	Christensenellales	CAG-138	PeH17	PeH17 sp001940845
BAI_80	BAI	BAI_b5688_1	27	2254939	0	80.24	1.69	FALSE	none			0	0	0	0	Firmicutes_A	Clostridia	Lachnospirales	Lachnospiraceae	Clostridium_Q	Clostridium_Q fessum
BAI_81	BAI	BAI_b15676_1	25.8	2303907	0	53.86	8.77	FALSE	none			0	0	0	0	Firmicutes_A	Clostridia	Lachnospirales	Lachnospiraceae	Blautia_A	Blautia_A sp900120195
BAI_82	BAI	BAI_b23979	25.4	2102640	0	72.07	1.75	FALSE	none			0	0	0	0	Firmicutes_A	Clostridia	Lachnospirales	Lachnospiraceae	AM51-8	AM51-8 sp003478275
BAI_83	BAI	BAI_b25754_1	25.4	4768704	0	56.9	0	FALSE	none	s		0	0	0	0	Bacteroidota	Bacteroidia	Bacteroidales	Bacteroidaceae	Bacteroides	Bacteroides sp900555635
BAI_84	BAI	BAI_b16401_1	23.9	3411394	0	64	0	FALSE	none			0	0	0	0	Firmicutes_A	Clostridia	Oscillospirales	Oscillospiraceae	Dysosmobacter	Dysosmobacter sp014297375
BAI_85	BAI	BAI_b6572_1	23.1	2828781	0	66.56	0.88	FALSE	none	s		0	0	0	0	Firmicutes_A	Clostridia	Lachnospirales	Lachnospiraceae	COE1	COE1 sp001916965
BAI_86	BAI	BAI_b16297_1	23	1954726	0	53.79	5.17	FALSE	none			0	0	0	0	Firmicutes_A	Clostridia	Oscillospirales	Oscillospiraceae	Dysosmobacter	Dysosmobacter sp000436875
BAI_87	BAI	BAI_b21202_1	22.1	3010449	0	91.02	1.48	FALSE	none	s		0	0	0	0	Firmicutes_A	Clostridia	Christensenellales	CAG-74	Egerieenecus	Egerieenecus merdigallinarum
BAI_88	BAI	BAI_b44307_1	21.9	4336904	0	95.57	1.69	FALSE	none			0	0	0	0	Proteobacteria	Gammaproteobacteria	Enterobacterales	Enterobacteriaceae	Escherichia	Escherichia coli
BAI_89	BAI	BAI_b27765_1	21.5	2283531	0	80.53	0.84	FALSE	none	s		0	0	0	0	Firmicutes_A	Clostridia	Lachnospirales	Lachnospiraceae	Eubacterium_G	Eubacterium_G sp000434315
BAI_90	BAI	BAI_b32251	21.3	1890929	0	85.87	1.57	FALSE	none	a		0	0	0	0	Firmicutes_A	Clostridia	Oscillospirales	Ruminococcaceae	Ruminococcus_C	Ruminococcus_C sp000433635
BAI_91	BAI	BAI_b53437_1	20.8	2342809	0	79.46	2.08	FALSE	none	s		0	0	0	0	Firmicutes_A	Clostridia	Lachnospirales	Lachnospiraceae	Eisenbergiella	Eisenbergiella sp900066775
BAI_92	BAI	BAI_b50061	20.5	2614564	0	94.57	2.63	FALSE	none	m		0	0	0	0	Firmicutes_A	Clostridia	Oscillospirales	Acutalibacteraceae	Fimivicinus	Fimivicinus sp900544375
BAI_93	BAI	BAI_b21137_1	20	2465064	0	92	1.28	FALSE	none	s		0	0	0	0	Firmicutes_A	Clostridia	Clostridiales	Clostridiaceae	Clostridium	Clostridium sp900539375
BAI_94	BAI	BAI_b21422_1	19.9	2385743	0	69.22	5.74	FALSE	none	s		0	0	0	0	Firmicutes_A	Clostridia	Lachnospirales	Lachnospiraceae	Coprococcus_A	Coprococcus_A catus
BAI_95	BAI	BAI_b42445_1	19.5	2616733	0	59.25	3.51	FALSE	none	s		0	0	0	0	Firmicutes_A	Clostridia	Lachnospirales	Lachnospiraceae	Choladousia	Choladousia sp902363135
BAI_96	BAI	BAI_b33656	19.4	2603698	0	89.13	1.48	FALSE	none	s		0	0	0	0	Firmicutes_A	Clostridia	Christensenellales	CAG-74	Limiplasma	Limiplasma pullistercoris
BAI_97	BAI	BAI_b17710_1	19.2	3276017	0	92.37	0.47	FALSE	none	s		0	0	0	0	Firmicutes	Bacilli	Erysipelotrichales	Coprobacillaceae	Erysipelatoclostridium	Erysipelatoclostridium ramosum
BAI_98	BAI	BAI_b53483_1	18.8	1746314	0	59.97	0.88	FALSE	none			0	0	0	0	Firmicutes_A	Clostridia	Lachnospirales	Lachnospiraceae	Choladocola	Choladocola sp003480725
BAI_99	BAI	BAI_b71092_1	18.8	2046489	0	83.18	1.85	FALSE	none	a		0	0	0	0	Firmicutes_A	Clostridia	Oscillospirales	Acutalibacteraceae	Avimonas_A	Avimonas_A narfia
BAI_100	BAI	BAI_b5779_1	18.6	2797904	0	82.48	3.69	FALSE	none	a		0	0	0	0	Firmicutes_A	Clostridia	Oscillospirales	Oscillospiraceae	HGM13006	HGM13006 sp900757695
BAI_101	BAI	BAI_b6066_1	18	1739049	0	62.93	0	FALSE	none			0	0	0	0	Firmicutes_A	Clostridia	Oscillospirales	Oscillospiraceae	Lawsonibacter	Lawsonibacter sp900066645
BAI_102	BAI	BAI_b5472_1	17.3	2333653	0	76.66	0.4	FALSE	none	s		0	0	0	0	Firmicutes_A	Clostridia	Christensenellales	CAG-74	Ventricola	Ventricola sp900542445
BAI_103	BAI	BAI_b29715_1	17.1	1962362	0	88.26	1.45	FALSE	none	a		0	0	0	0	Firmicutes_A	Clostridia	Oscillospirales	Acutalibacteraceae	UMGS1071	UMGS1071 sp900542375
BAI_104	BAI	BAI_b19693_1	16.6	1997697	0	88.04	1.71	FALSE	none			0	0	0	0	Actinobacteriota	Actinomycetia	Actinomycetales	Bifidobacteriaceae	Bifidobacterium	Bifidobacterium longum
BAI_105	BAI	BAI_b2518_1	16.2	2157141	0	53.13	1.75	FALSE	none			0	0	0	0	Firmicutes_A	Clostridia	Lachnospirales	Lachnospiraceae	Faecalimonas	Faecalimonas phoceensis
BAI_106	BAI	BAI_b17252_1	15.5	1934434	0	69.8	0	FALSE	none	a		0	0	0	0	Firmicutes_A	Clostridia	Oscillospirales	Acutalibacteraceae	Clostridium_A	Clostridium_A leptum
BAI_107	BAI	BAI_b1342_1	15.1	2200143	0	55.04	1.75	FALSE	none	s		0	0	0	0	Firmicutes_A	Clostridia	Lachnospirales	Lachnospiraceae	Butyribacter	Butyribacter intestini
BAI_108	BAI	BAI_b27871_1	15	1603457	0	57.56	7.35	FALSE	none	t		0	0	0	0	Firmicutes	Bacilli	Erysipelotrichales	Coprobacillaceae	Faecalibacillus	Faecalibacillus intestinalis
BAI_109	BAI	BAI_b16603_1	14.3	1070346	0	61.18	2.06	FALSE	none	t		0	0	0	0	Firmicutes_C	Negativicutes	Veillonellales	Dialisteraceae	Dialister	Dialister invisus
BAI_110	BAI	BAI_b761	14.3	1760990	0	68.05	3.1	FALSE	none	a		0	0	0	0	Firmicutes_A	Clostridia	Oscillospirales	Acutalibacteraceae	UMGS1591	UMGS1591 sp.
BAI_111	BAI	BAI_b65139_1	14.2	1945118	0	56.09	0	FALSE	none	s		0	0	0	0	Firmicutes_A	Clostridia	Lachnospirales	Lachnospiraceae	UMGS1370	UMGS1370 sp900542035
BAI_112	BAI	BAI_b34112_1	13.4	1315864	0	51.29	7.26	FALSE	none	s		0	0	0	0	Firmicutes_A	Clostridia	Peptostreptococcales	Peptostreptococcaceae	Intestinibacter	Intestinibacter sp.
BAI_113	BAI	BAI_b43445_1	12.8	1366435	0	62.01	0.89	FALSE	none	a		0	0	0	0	Firmicutes_A	Clostridia	Oscillospirales	Ruminococcaceae	UBA866	UBA866 sp900543295
BAJ_1	BAJ	BAJ_b45559_1	774.2	2610337	0	51.72	0	TRUE	too_many	f		0	0	0	0	Bacteroidota	Bacteroidia	Bacteroidales	Bacteroidaceae	Phocaeicola	Phocaeicola dorei
BAJ_2	BAJ	BAJ_b41668_1	464	2783924	3	86.94	2.39	FALSE	ok	s		79	17	33	3	Bacteroidota	Bacteroidia	Bacteroidales	Bacteroidaceae	Prevotella	Prevotella copri
BAJ_3	BAJ	BAJ_b11477_1	453.2	1964720	0	97.72	1.21	TRUE	too_many	f		0	0	0	0	Actinobacteriota	Coriobacteriia	Coriobacteriales	Coriobacteriaceae	Collinsella	Collinsella sp900764415
BAJ_4	BAJ	BAJ_b17726	447.4	2603358	3	92.83	2.82	TRUE	ok	s		277	31	0	0	Firmicutes_A	Clostridia	Lachnospirales	Lachnospiraceae	Agathobacter	Agathobacter faecis
BAJ_5	BAJ	BAJ_b23955_1	432.6	2470523	2	64.55	1.75	FALSE	ok	s		0	0	0	0	Firmicutes_A	Clostridia	Lachnospirales	Lachnospiraceae	Eubacterium_I	Eubacterium_I ramulus
BAJ_6	BAJ	BAJ_b36780_1	413.6	2701054	4	74.94	1.75	TRUE	ok			167	56	0	0	Firmicutes_A	Clostridia	Lachnospirales	Lachnospiraceae	Blautia_A	Blautia_A sp000436615
BAJ_7	BAJ	BAJ_b66011_1	362.8	3309320	3	92.56	1.33	TRUE	ok	s		14	9	0	0	Firmicutes_A	Clostridia	Lachnospirales	Lachnospiraceae	Roseburia	Roseburia intestinalis
BAJ_8	BAJ	BAJ_b44037_2	351.4	1648952	0	70.05	1.48	TRUE	too_many			0	0	0	0	Firmicutes_A	Clostridia	Lachnospirales	Lachnospiraceae	Fusicatenibacter	Fusicatenibacter saccharivorans
BAJ_9	BAJ	BAJ_b13729_1	265.4	2512122	4	79.95	0	TRUE	ok	l		39	17	0	0	Firmicutes_A	Clostridia	Lachnospirales	Lachnospiraceae	Lachnospira	Lachnospira rogosae_A
BAJ_10	BAJ	BAJ_b20939_1	262	2531378	3	74.19	0	TRUE	ok	s		14	3	0	0	Firmicutes_A	Clostridia	Lachnospirales	Lachnospiraceae	Agathobacter	Agathobacter sp905209075
BAJ_11	BAJ	BAJ_b33608	261.3	1859051	2	86.45	1.4	FALSE	ok	a		17	13	0	0	Firmicutes_A	Clostridia	Oscillospirales	Oscillospiraceae	CAG-103	CAG-103 sp900757655
BAJ_12	BAJ	BAJ_b5728_1	255.2	3939933	0	71.87	0	TRUE	too_many	s		0	0	0	0	Bacteroidota	Bacteroidia	Bacteroidales	Bacteroidaceae	Bacteroides	Bacteroides uniformis
BAJ_13	BAJ	BAJ_b43994_1	245	3250343	2	93.86	0.13	FALSE	ok	s		107	37	0	0	Firmicutes_A	Clostridia	Lachnospirales	Lachnospiraceae	Butyribacter	Butyribacter intestini
BAJ_14	BAJ	BAJ_b33175	242.8	2901194	0	97.28	0	FALSE	none			0	0	0	0	Verrucomicrobiota	Verrucomicrobiae	Verrucomicrobiales	Akkermansiaceae	Akkermansia	Akkermansia sp001580195
BAJ_15	BAJ	BAJ_b7807_1	201.9	1766511	0	76.76	1.74	FALSE	too_many			0	0	0	0	Firmicutes_A	Clostridia	Lachnospirales	Lachnospiraceae	KLE1615	KLE1615 sp900066985
BAJ_16	BAJ	BAJ_b1378_1	192.5	3352523	4	74.86	5.26	FALSE	ok			107	23	2	1	Firmicutes_A	Clostridia	Lachnospirales	Lachnospiraceae	Blautia_A	Blautia_A faecis
BAJ_17	BAJ	BAJ_b5192_1	172.2	2103436	2	57.02	0	FALSE	ok	s		0	0	0	0	Firmicutes_A	Clostridia	Lachnospirales	Lachnospiraceae	Oliverpabstia	Oliverpabstia intestinalis
BAJ_18	BAJ	BAJ_b38150_1	172	1619272	0	51.04	0	TRUE	too_many			0	0	0	0	Firmicutes_A	Clostridia	Lachnospirales	Lachnospiraceae	Roseburia	Roseburia inulinivorans
BAJ_19	BAJ	BAJ_b7323	170.7	2132287	0	56.58	0.37	FALSE	none			0	0	0	0	Bacteroidota	Bacteroidia	Bacteroidales	Bacteroidaceae	Prevotella	Prevotella rara
BAJ_20	BAJ	BAJ_b22900_1	165.3	1640889	2	52.59	0	FALSE	ok	a		81	10	1	1	Firmicutes_A	Clostridia	Oscillospirales	Butyricicoccaceae	Agathobaculum	Agathobaculum sp900544475
BAJ_21	BAJ	BAJ_b25242	146.4	2632854	2	99.37	0	TRUE	ok	v		123	78	5	2	Proteobacteria	Gammaproteobacteria	Burkholderiales	Burkholderiaceae	Parasutterella	Parasutterella sp900552195
BAJ_22	BAJ	BAJ_b27550_1	145.4	1673441	2	51.95	0	TRUE	ok			5	3	0	0	Firmicutes_A	Clostridia	Oscillospirales	Ruminococcaceae	Gemmiger	Gemmiger formicilis
BAJ_23	BAJ	BAJ_b44203	144	2890986	0	98.25	1.17	FALSE	none	s		0	0	0	0	Firmicutes_A	Clostridia	Christensenellales	CAG-74	UBA11524	UBA11524 sp000437595
BAJ_24	BAJ	BAJ_b10592_1	132.3	2138730	3	91.64	0.71	TRUE	ok	t		118	73	33	36	Firmicutes	Bacilli	Erysipelotrichales	Erysipelotrichaceae	Holdemanella	Holdemanella porci
BAJ_25	BAJ	BAJ_b3865_1	127.6	1503090	0	54.62	1.72	TRUE	too_many			0	0	0	0	Firmicutes_A	Clostridia	Lachnospirales	Lachnospiraceae	Mediterraneibacter	Mediterraneibacter faecis
BAJ_26	BAJ	BAJ_b38680_1	126.9	1841537	0	90.8	2.27	TRUE	too_many	s		0	0	0	0	Actinobacteriota	Actinomycetia	Actinomycetales	Bifidobacteriaceae	Bifidobacterium	Bifidobacterium adolescentis
BAJ_27	BAJ	BAJ_b2854_1	123.1	1781464	2	89	1.59	FALSE	ok			1	1	0	0	Firmicutes_A	Clostridia	Oscillospirales	Oscillospiraceae	CAG-83	CAG-83 sp000431575
BAJ_28	BAJ	BAJ_b29368	122.7	2138796	0	95.8	0.67	FALSE	none	a		0	0	0	0	Firmicutes_A	Clostridia	Oscillospirales	Butyricicoccaceae	Butyricicoccus_A	Butyricicoccus_A sp002395695
BAJ_29	BAJ	BAJ_b32624_1	121	2359801	0	73.97	0	FALSE	too_many	s		0	0	0	0	Firmicutes_A	Clostridia	Lachnospirales	Lachnospiraceae	Dorea	Dorea formicigenerans
BAJ_30	BAJ	BAJ_b18424	119.8	1948705	4	90.08	1.41	TRUE	ok	s		21	4	0	0	Firmicutes_A	Clostridia	Lachnospirales	Lachnospiraceae	Mediterraneibacter	Mediterraneibacter lactaris
BAJ_31	BAJ	BAJ_b1029_1	116.2	1883394	0	83.04	2.92	TRUE	none	s		0	0	0	0	Firmicutes_A	Clostridia	Lachnospirales	Lachnospiraceae	Bariatricus	Bariatricus comes
BAJ_32	BAJ	BAJ_b58090_1	103.2	2719673	3	87.53	3.32	FALSE	ok	s		49	21	10	8	Firmicutes_A	Clostridia	Lachnospirales	Lachnospiraceae	Ventrimonas	Ventrimonas sp003478505
BAJ_33	BAJ	BAJ_b25134_1	103.1	2387421	0	89.54	1.75	FALSE	too_many			0	0	0	0	Firmicutes_A	Clostridia	Lachnospirales	Lachnospiraceae	Anaerobutyricum	Anaerobutyricum hallii
BAJ_34	BAJ	BAJ_b21293_1	102.4	2295751	0	74.19	0	FALSE	too_many	s		0	0	0	0	Firmicutes_A	Clostridia	Lachnospirales	Lachnospiraceae	Agathobacter	Agathobacter rectalis
BAJ_35	BAJ	BAJ_b48318_1	97.7	2001040	2	91.53	1.31	FALSE	ok			0	0	0	0	Actinobacteriota	Actinomycetia	Actinomycetales	Bifidobacteriaceae	Bifidobacterium	Bifidobacterium longum
BAJ_36	BAJ	BAJ_b6807	84.7	2500154	2	89.75	0.63	TRUE	ok	s		2	1	0	0	Firmicutes_A	Clostridia	Lachnospirales	Lachnospiraceae	UMGS1375	UMGS1375 sp900066615
BAJ_37	BAJ	BAJ_b5692_1	80	2670235	0	97.99	0	FALSE	none	a		0	0	0	0	Firmicutes_A	Clostridia	Oscillospirales	Ruminococcaceae	Ruminiclostridium_E	Ruminiclostridium_E siraeum
BAJ_38	BAJ	BAJ_b36942_1	78.8	2314996	0	98.1	0	FALSE	too_many	s		0	0	0	0	Firmicutes_A	Clostridia	Clostridiales	Clostridiaceae	Clostridium	Clostridium sp001916075
BAJ_39	BAJ	BAJ_b1169_1	78.2	2688934	0	90.58	1.17	FALSE	none	s		0	0	0	0	Firmicutes_A	Clostridia	Lachnospirales	Lachnospiraceae	Blautia	Blautia stercoris
BAJ_40	BAJ	BAJ_b38598_1	76.2	2430163	0	60.85	0	FALSE	none	s		0	0	0	0	Bacteroidota	Bacteroidia	Bacteroidales	Bacteroidaceae	Prevotella	Prevotella sp900313215
BAJ_41	BAJ	BAJ_b49230	71.9	2094582	3	82.61	3.37	FALSE	ok			49	37	0	0	Firmicutes_A	Clostridia	Oscillospirales	Ruminococcaceae	Gemmiger	Gemmiger qucibialis
BAJ_42	BAJ	BAJ_b22958_1	69.2	2186170	0	97.52	0.62	FALSE	none	s		0	0	0	0	Proteobacteria	Gammaproteobacteria	Burkholderiales	Burkholderiaceae	Sutterella	Sutterella wadsworthensis_A
BAJ_43	BAJ	BAJ_b22638_1	68.3	1811309	3	55.54	3.57	FALSE	ok	a		4	2	1	1	Firmicutes_A	Clostridia	Oscillospirales	Ruminococcaceae	Gemmiger	Gemmiger sp900539695
BAJ_44	BAJ	BAJ_b39373	64	1748437	2	86.78	2.35	FALSE	ok	a		19	16	4	2	Firmicutes_A	Clostridia	Oscillospirales	Oscillospiraceae	ER4	ER4 sp000765235
BAJ_45	BAJ	BAJ_b56238_1	62.4	6214444	2	65.67	0	FALSE	ok	s		105	65	51	30	Bacteroidota	Bacteroidia	Bacteroidales	Bacteroidaceae	Bacteroides	Bacteroides cellulosilyticus
BAJ_46	BAJ	BAJ_b17553	60	2457760	0	92.85	0.39	FALSE	none			0	0	0	0	Firmicutes_A	Clostridia	Lachnospirales	Lachnospiraceae	CAG-127	CAG-127 sp900319515
BAJ_47	BAJ	BAJ_b13410	55.8	2280006	0	99.98	1.55	FALSE	none	t		0	0	0	0	Firmicutes_C	Negativicutes	Acidaminococcales	Acidaminococcaceae	Phascolarctobacterium	Phascolarctobacterium faecium
BAJ_48	BAJ	BAJ_b31525_1	52.2	2394184	0	93.33	1.34	FALSE	none	s		0	0	0	0	Firmicutes_A	Clostridia	Lachnospirales	Lachnospiraceae	Eubacterium_G	Eubacterium_G ventriosum
BAJ_49	BAJ	BAJ_b26217	51.9	3908032	0	58.77	1.75	FALSE	none	t		0	0	0	0	Proteobacteria	Gammaproteobacteria	Pseudomonadales	Pseudomonadaceae	Pseudomonas_E	Pseudomonas_E bubulae
BAJ_50	BAJ	BAJ_b5348	51	2326438	2	66.33	4.31	FALSE	ok			95	64	94	64	Bacteroidota	Bacteroidia	Bacteroidales	Rikenellaceae	Alistipes	Alistipes shahii
BAJ_51	BAJ	BAJ_b10841	50.3	1892522	0	76.74	2.4	FALSE	none	a		0	0	0	0	Firmicutes_A	Clostridia	Oscillospirales	Oscillospiraceae	Evtepia	Evtepia sp004556345
BAJ_52	BAJ	BAJ_b4293_1	50.3	2723575	0	71.05	0	FALSE	none	s		0	0	0	0	Firmicutes_A	Clostridia	Lachnospirales	Lachnospiraceae	Roseburia	Roseburia hominis
BAJ_53	BAJ	BAJ_b39181	49.8	2232806	0	82.57	0.42	FALSE	none	s		0	0	0	0	Firmicutes_A	Clostridia	Lachnospirales	Lachnospiraceae	Eisenbergiella	Eisenbergiella sp900066775
BAJ_54	BAJ	BAJ_b7888_1	49.5	2233820	0	97.88	1.27	FALSE	none	s		0	0	0	0	Firmicutes_C	Negativicutes	Selenomonadales	Selenomonadaceae	Megamonas	Megamonas funiformis
BAJ_55	BAJ	BAJ_b18978	48.7	2106195	2	79.2	1.75	FALSE	ok	s		27	11	23	10	Firmicutes_A	Clostridia	Lachnospirales	Lachnospiraceae	Lachnospira	Lachnospira eligens_A
BAJ_56	BAJ	BAJ_b57219_1	47.7	2838867	2	51.33	1.72	FALSE	ok			2	1	0	0	Bacteroidota	Bacteroidia	Bacteroidales	Bacteroidaceae	Bacteroides	Bacteroides eggerthii
BAJ_57	BAJ	BAJ_b15190_1	43.6	1528185	0	79.95	3.79	FALSE	none			0	0	0	0	Firmicutes_A	Clostridia	Oscillospirales	Oscillospiraceae	ER4	ER4 sp900317525
BAJ_58	BAJ	BAJ_b4829	43.4	1773003	2	85.14	3.73	FALSE	ok	s		11	10	11	10	Bacteroidota	Bacteroidia	Bacteroidales	Rikenellaceae	Alistipes	Alistipes putredinis
BAJ_59	BAJ	BAJ_b16247	41.3	2437590	2	68.97	3.45	FALSE	ok	s		123	38	1	1	Bacteroidota	Bacteroidia	Bacteroidales	Rikenellaceae	Alistipes	Alistipes onderdonkii
BAJ_60	BAJ	BAJ_b9430_1	38.7	2365338	2	66.49	3.51	FALSE	ok			3	2	1	1	Firmicutes_A	Clostridia	Lachnospirales	Lachnospiraceae	RUG115	RUG115 sp900066395
BAJ_61	BAJ	BAJ_b43888_1	38.6	2598423	0	95.2	1.34	FALSE	none	a		0	0	0	0	Firmicutes_A	Clostridia	UBA1381	UBA1381	CAG-41	CAG-41 sp900066215
BAJ_62	BAJ	BAJ_b28680_2	35.8	4951101	0	52.59	3.45	FALSE	none			0	0	0	0	Bacteroidota	Bacteroidia	Bacteroidales	Bacteroidaceae	Bacteroides	Bacteroides faecis
BAJ_63	BAJ	BAJ_b8335_1	33.8	2942384	0	64.91	3.51	FALSE	none	s		0	0	0	0	Firmicutes_A	Clostridia	Lachnospirales	Lachnospiraceae	Limivivens	Limivivens sp900543575
BAJ_64	BAJ	BAJ_b52543_1	33	1841286	0	56.03	6.03	FALSE	none	q		0	0	0	0	Firmicutes_A	Clostridia	Oscillospirales	Oscillospiraceae	Lawsonibacter	Lawsonibacter sp900549405
BAJ_65	BAJ	BAJ_b17059_1	31.7	1843224	0	55.69	0	FALSE	none			0	0	0	0	Firmicutes_A	Clostridia	Lachnospirales	Lachnospiraceae	Clostridium_Q	Clostridium_Q fessum
BAJ_66	BAJ	BAJ_b51515_1	29	2492096	2	82.76	3.45	FALSE	ok	s		6	2	0	0	Firmicutes_A	Clostridia	Peptostreptococcales	Peptostreptococcaceae	Romboutsia	Romboutsia timonensis
BAJ_67	BAJ	BAJ_b26728_2	28.7	2201855	0	62.28	3.51	FALSE	none	f		0	0	0	0	Firmicutes_A	Clostridia	Lachnospirales	Lachnospiraceae	Lachnospira	Lachnospira sp900316325
BAJ_68	BAJ	BAJ_b20340	28.1	2108990	0	85.68	3.36	FALSE	none	s		0	0	0	0	Actinobacteriota	Coriobacteriia	Coriobacteriales	Eggerthellaceae	Senegalimassilia	Senegalimassilia faecalis
BAJ_69	BAJ	BAJ_b7102	27	1810929	0	94.25	0	FALSE	none	a		0	0	0	0	Firmicutes_A	Clostridia	Oscillospirales	Acutalibacteraceae	Eubacterium_R	Eubacterium_R sp000434995
BAJ_70	BAJ	BAJ_b20176	25.9	4460620	0	78.97	0	FALSE	none	s		0	0	0	0	Bacteroidota	Bacteroidia	Bacteroidales	Tannerellaceae	Parabacteroides	Parabacteroides distasonis
BAJ_71	BAJ	BAJ_b12593_1	25.4	2424807	0	75.92	0.58	FALSE	none	s		0	0	0	0	Firmicutes_A	Clostridia	Lachnospirales	Lachnospiraceae	Butyribacter	Butyribacter sp003529475
BAJ_72	BAJ	BAJ_b26518	25.3	1924407	0	99.09	0.45	FALSE	none	f		0	0	0	0	Proteobacteria	Gammaproteobacteria	Enterobacterales	Pasteurellaceae	Haemophilus_D	Haemophilus_D sp900756155
BAJ_73	BAJ	BAJ_b12987	24.7	1756582	0	86.66	1.61	FALSE	none			0	0	0	0	Actinobacteriota	Actinomycetia	Actinomycetales	Bifidobacteriaceae	Bifidobacterium	Bifidobacterium animalis
BAJ_74	BAJ	BAJ_b5384	24.6	1829848	0	50.16	0	FALSE	none			0	0	0	0	Firmicutes_A	Clostridia	Lachnospirales	Lachnospiraceae	UBA11774	UBA11774 sp003507655
BAJ_75	BAJ	BAJ_b10621	24.1	1792232	0	81.04	0	FALSE	none	s		0	0	0	0	Firmicutes_A	Clostridia	Lachnospirales	Anaerotignaceae	Anaerotignum	Anaerotignum faecicola
BAJ_76	BAJ	BAJ_b26317	23.9	3495824	2	94.67	0.61	FALSE	ok	s		1	1	1	1	Desulfobacterota_I	Desulfovibrionia	Desulfovibrionales	Desulfovibrionaceae	Bilophila	Bilophila wadsworthia
BAJ_77	BAJ	BAJ_b21084_1	23.6	1951392	0	93.99	0.42	FALSE	none	i		0	0	0	0	Firmicutes_C	Negativicutes	Veillonellales	Veillonellaceae	Veillonella	Veillonella nakazawae
BAJ_78	BAJ	BAJ_b4947	23.5	1862722	0	90.14	0	FALSE	none			0	0	0	0	Actinobacteriota	Coriobacteriia	Coriobacteriales	Eggerthellaceae	Slackia_A	Slackia_A isoflavoniconvertens
BAJ_79	BAJ	BAJ_b6128	22.7	2882712	0	82.07	4.91	FALSE	none			0	0	0	0	Actinobacteriota	Coriobacteriia	Coriobacteriales	Eggerthellaceae	Eggerthella	Eggerthella lenta
BAJ_80	BAJ	BAJ_b37099	22.4	1970060	0	89.7	0.17	FALSE	none	a		0	0	0	0	Firmicutes_A	Clostridia	Oscillospirales	Acutalibacteraceae	UBA1417	UBA1417 sp003531055
BAJ_81	BAJ	BAJ_b72339_1	20.8	2622667	0	58.56	1.75	FALSE	none			0	0	0	0	Firmicutes_A	Clostridia	Lachnospirales	Lachnospiraceae	Choladousia	Choladousia sp902363665
BAJ_82	BAJ	BAJ_b5080	19.5	1485363	0	90.31	0.32	FALSE	none	i		0	0	0	0	Firmicutes_C	Negativicutes	Veillonellales	Dialisteraceae	Allisonella	Allisonella histaminiformans
BAJ_83	BAJ	BAJ_b29827	19.2	2118826	0	69.47	4.31	FALSE	none			0	0	0	0	Firmicutes_A	Clostridia	Oscillospirales	Oscillospiraceae	Lawsonibacter	Lawsonibacter asaccharolyticus
BAJ_84	BAJ	BAJ_b18306	18.6	2001002	2	84.82	6.8	FALSE	ok			4	1	4	1	Actinobacteriota	Coriobacteriia	Coriobacteriales	Eggerthellaceae	Ellagibacter	Ellagibacter isourolithinifaciens
BAJ_85	BAJ	BAJ_b5187	18.6	1622555	0	76.2	0.67	FALSE	none	a		0	0	0	0	Firmicutes_A	Clostridia	Oscillospirales	Ruminococcaceae	Ruminococcus_C	Ruminococcus_C callidus
BAJ_86	BAJ	BAJ_b20012	17	1398828	0	67.24	0	FALSE	none	a		0	0	0	0	Firmicutes_A	Clostridia	Oscillospirales	Acutalibacteraceae	UMGS1071	UMGS1071 sp.
BAJ_87	BAJ	BAJ_b16069_1	15.7	1579048	0	53.92	0	FALSE	none			0	0	0	0	Firmicutes_A	Clostridia	Lachnospirales	Lachnospiraceae	Eubacterium_F	Eubacterium_F sp000433735
BAJ_88	BAJ	BAJ_b3071	15.7	3026872	0	81.27	1.61	FALSE	none	s		0	0	0	0	Bacteroidota	Bacteroidia	Bacteroidales	Marinifilaceae	Odoribacter	Odoribacter splanchnicus
BAJ_89	BAJ	BAJ_b17476	15	1532880	0	75.46	2.82	FALSE	none	s		0	0	0	0	Firmicutes_A	Clostridia	Christensenellales	CAG-138	PeH17	PeH17 sp000435055
BAJ_90	BAJ	BAJ_b46358	13.5	2103602	0	69.21	1.32	FALSE	none			0	0	0	0	Bacteroidota	Bacteroidia	Bacteroidales	Barnesiellaceae	Barnesiella	Barnesiella intestinihominis
BAJ_91	BAJ	BAJ_b31283	12.1	758978	0	53.67	0	FALSE	none			0	0	0	0	Actinobacteriota	Coriobacteriia	Coriobacteriales	Eggerthellaceae	CAG-1427	CAG-1427 sp000435675
BAK_1	BAK	BAK_b27628	1115	2606054	2	97.96	0	TRUE	ok			2	2	0	0	Verrucomicrobiota	Verrucomicrobiae	Verrucomicrobiales	Akkermansiaceae	Akkermansia	Akkermansia muciniphila
BAK_2	BAK	BAK_b3684_1	927.1	2164566	0	96.56	0.25	TRUE	none	f		0	0	0	0	Actinobacteriota	Actinomycetia	Actinomycetales	Bifidobacteriaceae	Bifidobacterium	Bifidobacterium longum
BAK_3	BAK	BAK_b39346_1	854	4680073	4	80.31	0.86	TRUE	ok	f		27	27	0	0	Bacteroidota	Bacteroidia	Bacteroidales	Bacteroidaceae	Phocaeicola	Phocaeicola dorei
BAK_4	BAK	BAK_b37708_1	540	2073849	0	87.57	3.02	TRUE	too_many	s		0	0	0	0	Firmicutes_A	Clostridia	Lachnospirales	Lachnospiraceae	Agathobacter	Agathobacter faecis
BAK_5	BAK	BAK_b12409_1	448.3	1710729	0	71.71	1.08	TRUE	too_many	s		0	0	0	0	Firmicutes_A	Clostridia	Lachnospirales	Lachnospiraceae	Fusicatenibacter	Fusicatenibacter saccharivorans
BAK_6	BAK	BAK_b29646	428.8	1421047	0	69.52	0.6	TRUE	none			0	0	0	0	Actinobacteriota	Actinomycetia	Actinomycetales	Bifidobacteriaceae	Bifidobacterium	Bifidobacterium pseudocatenulatum
BAK_7	BAK	BAK_b16742_1	365.6	2762543	5	95.41	0.74	FALSE	ok			12	8	0	0	Firmicutes_A	Clostridia	Lachnospirales	Lachnospiraceae	Agathobacter	Agathobacter rectalis
BAK_8	BAK	BAK_b15147_1	349.9	2315559	0	97.95	0	FALSE	too_many	a		0	0	0	0	Firmicutes_A	Clostridia	Oscillospirales	Ruminococcaceae	Ruminococcus_D	Ruminococcus_D bicirculans
BAK_9	BAK	BAK_b9743_1	301.1	2898531	0	92.32	1.77	FALSE	too_many	s		0	0	0	0	Firmicutes_A	Clostridia	Lachnospirales	Lachnospiraceae	Roseburia	Roseburia inulinivorans
BAK_10	BAK	BAK_b22761_1	272.1	2028714	2	99.33	1.01	FALSE	ok	a		1	2	0	0	Firmicutes_A	Clostridia	Oscillospirales	Acutalibacteraceae	Ruminococcus_E	Ruminococcus_E bromii_B
BAK_11	BAK	BAK_b38180_1	249.3	2972357	3	98.25	0.93	FALSE	ok	f		5	1	0	0	Firmicutes_A	Clostridia	Christensenellales	CAG-74	UBA11524	UBA11524 sp000437595
BAK_12	BAK	BAK_b34759	238.9	2883911	0	93.85	2.01	FALSE	none			0	0	0	0	Firmicutes_A	Clostridia	Lachnospirales	Lachnospiraceae	Coprococcus	Coprococcus eutactus_A
BAK_13	BAK	BAK_b2423_1	210.8	6735335	3	95.49	0.57	TRUE	ok	s		3	3	2	2	Bacteroidota	Bacteroidia	Bacteroidales	Bacteroidaceae	Bacteroides	Bacteroides cellulosilyticus
BAK_14	BAK	BAK_b8717_1	209.6	1946674	3	55.36	1.79	TRUE	ok	a		159	46	0	0	Firmicutes_A	Clostridia	Oscillospirales	Ruminococcaceae	Gemmiger	Gemmiger formicilis
BAK_15	BAK	BAK_b40343_1	200.7	2906000	0	92.79	1.52	FALSE	none	s		0	0	0	0	Bacteroidota	Bacteroidia	Bacteroidales	Rikenellaceae	Alistipes	Alistipes onderdonkii
BAK_16	BAK	BAK_b24971_1	198.1	2009586	3	51.91	1.75	TRUE	ok			82	52	0	0	Firmicutes_A	Clostridia	Lachnospirales	Lachnospiraceae	Anaerostipes	Anaerostipes hadrus_A
BAK_17	BAK	BAK_b18003	192	2640364	3	95.82	0.49	TRUE	ok	f		13	7	0	0	Actinobacteriota	Coriobacteriia	Coriobacteriales	Eggerthellaceae	Adlercreutzia	Adlercreutzia celatus_A
BAK_18	BAK	BAK_b17053_1	185	4390909	2	76.36	0	TRUE	ok			6	1	0	0	Bacteroidota	Bacteroidia	Bacteroidales	Bacteroidaceae	Bacteroides	Bacteroides uniformis
BAK_19	BAK	BAK_b20914_1	181.9	2356098	4	90.99	3.22	TRUE	ok	s		12	7	0	0	Firmicutes_A	Clostridia	Lachnospirales	Lachnospiraceae	Dorea_A	Dorea_A longicatena
BAK_20	BAK	BAK_b9144_1	160.3	2684113	2	69.65	1.75	FALSE	ok	s		6	4	0	0	Firmicutes_A	Clostridia	Lachnospirales	Lachnospiraceae	Lachnospira	Lachnospira sp000436535
BAK_21	BAK	BAK_b34808_1	155.2	2482420	3	61.91	1.75	TRUE	ok			13	13	0	0	Firmicutes_A	Clostridia	Lachnospirales	Lachnospiraceae	Blautia_A	Blautia_A wexlerae
BAK_22	BAK	BAK_b3620_1	153.9	3408971	4	88.95	1.97	TRUE	ok	s		21	10	0	0	Firmicutes_A	Clostridia	Lachnospirales	Lachnospiraceae	Roseburia	Roseburia intestinalis
BAK_23	BAK	BAK_b3762_1	149.8	6104801	2	66.38	0	TRUE	ok			11	12	0	0	Bacteroidota	Bacteroidia	Bacteroidales	Bacteroidaceae	Bacteroides	Bacteroides ovatus
BAK_24	BAK	BAK_b15276_1	144.7	5560346	2	69.83	0	FALSE	ok			15	5	0	0	Bacteroidota	Bacteroidia	Bacteroidales	Bacteroidaceae	Bacteroides	Bacteroides thetaiotaomicron
BAK_25	BAK	BAK_b13633	135.7	1921515	2	91.22	1.3	TRUE	ok	a		4	4	0	0	Firmicutes_A	Clostridia	Oscillospirales	Oscillospiraceae	ER4	ER4 sp000765235
BAK_26	BAK	BAK_b12308_1	127	2171098	2	90.81	0	FALSE	ok	a		3	3	0	0	Firmicutes_A	Clostridia	Oscillospirales	Ruminococcaceae	Ruminococcus_C	Ruminococcus_C sp000980705
BAK_27	BAK	BAK_b22906_1	126.3	2180427	2	87.5	2.95	FALSE	ok	a		0	0	0	0	Firmicutes_A	Clostridia	Oscillospirales	Ruminococcaceae	Gemmiger	Gemmiger qucibialis
BAK_28	BAK	BAK_b46001_1	123.2	2742881	3	94.41	0.64	FALSE	ok	s		6	4	1	1	Firmicutes_A	Clostridia	Lachnospirales	Lachnospiraceae	Blautia	Blautia stercoris
BAK_29	BAK	BAK_b2832	111.6	1767394	0	85.83	4.08	FALSE	none			0	0	0	0	Firmicutes_A	Clostridia	Oscillospirales	Oscillospiraceae	CAG-83	CAG-83 sp000431575
BAK_30	BAK	BAK_b3022_1	103.5	1931744	3	91.58	1.01	FALSE	ok	a		81	36	4	3	Firmicutes_A	Clostridia	Oscillospirales	Acutalibacteraceae	UBA1417	UBA1417 sp003531055
BAK_31	BAK	BAK_b32546_1	98.2	1818963	0	52.95	0	FALSE	too_many			0	0	0	0	Firmicutes_A	Clostridia	Lachnospirales	Lachnospiraceae	Blautia_A	Blautia_A faecis
BAK_32	BAK	BAK_b12338_1	93.7	2806885	2	92.98	1.9	FALSE	ok	s		2	1	0	0	Firmicutes_A	Clostridia	Lachnospirales	Lachnospiraceae	Ventrimonas	Ventrimonas sp900555625
BAK_33	BAK	BAK_b35258_1	87.6	2459957	2	75.06	0.88	FALSE	ok	s		0	0	0	0	Firmicutes_A	Clostridia	Lachnospirales	Lachnospiraceae	Lachnospira	Lachnospira eligens
BAK_34	BAK	BAK_b46995_1	80.3	2465123	0	98.08	0	FALSE	none	a		0	0	0	0	Firmicutes_A	Clostridia	Oscillospirales	Ruminococcaceae	Ruminiclostridium_E	Ruminiclostridium_E siraeum
BAK_35	BAK	BAK_b30338_1	77.3	2696716	0	83.32	1.44	FALSE	none	s		0	0	0	0	Firmicutes_A	Clostridia	Lachnospirales	Lachnospiraceae	KLE1615	KLE1615 sp900066985
BAK_36	BAK	BAK_b12739_1	75.8	4736389	3	92.11	2.14	FALSE	ok			13	4	0	0	Bacteroidota	Bacteroidia	Bacteroidales	Bacteroidaceae	Bacteroides	Bacteroides fragilis
BAK_37	BAK	BAK_b3524_1	75.3	2465605	3	75.73	0	FALSE	ok	s		5	2	0	0	Firmicutes_A	Clostridia	Lachnospirales	Lachnospiraceae	Dorea	Dorea formicigenerans
BAK_38	BAK	BAK_b23439_1	75	2193896	3	80.16	3.77	FALSE	ok	s	s->f	3	3	2	2	Firmicutes	Bacilli	Erysipelotrichales	Coprobacillaceae	Faecalibacillus	Faecalibacillus faecis
BAK_39	BAK	BAK_b40779_1	70.6	2485425	0	96.86	0.34	FALSE	none	s		0	0	0	0	Firmicutes_A	Clostridia	Lachnospirales	Lachnospiraceae	Eubacterium_F	Eubacterium_F sp003491505
BAK_40	BAK	BAK_b20160_1	68.4	1613033	0	77.64	2.18	FALSE	none			0	0	0	0	Firmicutes_A	Clostridia	Oscillospirales	Butyricicoccaceae	Agathobaculum	Agathobaculum sp003481705
BAK_41	BAK	BAK_b338_1	65.6	2080161	0	95.38	1.22	FALSE	none			0	0	0	0	Firmicutes_A	Clostridia	Lachnospirales	Lachnospiraceae	Mediterraneibacter	Mediterraneibacter lactaris
BAK_42	BAK	BAK_b4730	63.2	2963839	0	75.27	3.45	FALSE	none			0	0	0	0	Bacteroidota	Bacteroidia	Bacteroidales	Rikenellaceae	Alistipes	Alistipes finegoldii
BAK_43	BAK	BAK_b16512_1	61.4	2952073	3	63.48	3.51	FALSE	ok	s		8	6	0	0	Firmicutes_A	Clostridia	Lachnospirales	Lachnospiraceae	Enterocloster	Enterocloster sp900541315
BAK_44	BAK	BAK_b27860_1	58.8	1817820	0	86.97	0.73	FALSE	none			0	0	0	0	Firmicutes_A	Clostridia	Oscillospirales	Oscillospiraceae	CAG-103	CAG-103 sp000432375
BAK_45	BAK	BAK_b20421_1	57.3	2727678	0	87.68	4.27	FALSE	none	s		0	0	0	0	Firmicutes_A	Clostridia	Lachnospirales	Lachnospiraceae	Oliverpabstia	Oliverpabstia intestinalis
BAK_46	BAK	BAK_b7295_1	56.4	2235730	0	92.24	0.51	FALSE	none			0	0	0	0	Firmicutes_A	Clostridia	Lachnospirales	Lachnospiraceae	Eubacterium_F	Eubacterium_F sp000433735
BAK_47	BAK	BAK_b12556_1	53	2730982	0	73.89	1.75	FALSE	none			0	0	0	0	Firmicutes_A	Clostridia	Lachnospirales	Lachnospiraceae	Eubacterium_I	Eubacterium_I ramulus
BAK_48	BAK	BAK_b4530_1	52.7	2463120	2	78.03	0.84	FALSE	ok	s		2	1	0	0	Firmicutes_A	Clostridia	Lachnospirales	Lachnospiraceae	Anaerobutyricum	Anaerobutyricum hallii
BAK_49	BAK	BAK_b41558	51.3	2548675	0	77.12	8.54	FALSE	none			0	0	0	0	Firmicutes_A	Clostridia	Oscillospirales	Butyricicoccaceae	Agathobaculum	Agathobaculum butyriciproducens
BAK_50	BAK	BAK_b24247_1	51.1	2279746	0	72.37	1.75	FALSE	none	s		0	0	0	0	Firmicutes_A	Clostridia	Lachnospirales	Lachnospiraceae	Bariatricus	Bariatricus comes
BAK_51	BAK	BAK_b18981_1	50.6	1928219	0	80.5	3.52	FALSE	none			0	0	0	0	Firmicutes_A	Clostridia	Oscillospirales	Oscillospiraceae	CAG-83	CAG-83 sp900545585
BAK_52	BAK	BAK_b3119_1	49.4	2649825	0	93.84	1.85	FALSE	none	s		0	0	0	0	Firmicutes_A	Clostridia	Lachnospirales	Lachnospiraceae	Butyribacter	Butyribacter sp003529475
BAK_53	BAK	BAK_b44149_1	47.3	1372937	2	81.76	3.67	FALSE	ok	s		2	3	0	0	Firmicutes	Bacilli	Lactobacillales	Streptococcaceae	Streptococcus	Streptococcus thermophilus
BAK_54	BAK	BAK_b34863	47.2	2372164	0	99.98	1.5	FALSE	none	i		0	0	0	0	Firmicutes_C	Negativicutes	Acidaminococcales	Acidaminococcaceae	Phascolarctobacterium	Phascolarctobacterium faecium
BAK_55	BAK	BAK_b37192_1	46.4	2710416	2	58.05	4.39	FALSE	ok			1	1	0	0	Firmicutes_A	Clostridia	Lachnospirales	Lachnospiraceae	Blautia_A	Blautia_A sp000436615
BAK_56	BAK	BAK_b12245_1	45.9	2297215	2	62.63	1.75	FALSE	ok	s		0	0	0	0	Firmicutes_A	Clostridia	Lachnospirales	Lachnospiraceae	Lachnospira	Lachnospira rogosae_A
BAK_57	BAK	BAK_b23955_1	42.1	2261178	0	64.19	0	FALSE	none			0	0	0	0	Firmicutes_A	Clostridia	Lachnospirales	Lachnospiraceae	Anaerobutyricum	Anaerobutyricum soehngenii
BAK_58	BAK	BAK_b7465_1	39.9	2706440	0	82.63	2.35	FALSE	none	a		0	0	0	0	Firmicutes_A	Clostridia	Oscillospirales	Oscillospiraceae	CAG-170	CAG-170 sp900545925
BAK_59	BAK	BAK_b28189_1	37.8	2357794	0	97.43	1.29	FALSE	none	a		0	0	0	0	Firmicutes_A	Clostridia	UBA1381	UBA1381	CAG-41	CAG-41 sp900066215
BAK_60	BAK	BAK_b48023_1	36.1	1876556	0	96.74	0	FALSE	none	a		0	0	0	0	Firmicutes_A	Clostridia	Oscillospirales	Acutalibacteraceae	Eubacterium_R	Eubacterium_R sp000434995
BAK_61	BAK	BAK_b26295	36	2515206	2	97.68	0.56	FALSE	ok	a		4	2	0	0	Firmicutes_A	Clostridia	Monoglobales	Monoglobaceae	Monoglobus	Monoglobus pectinilyticus
BAK_62	BAK	BAK_b442	33.9	1683147	0	78.65	4.22	FALSE	none	s		0	0	0	0	Firmicutes_A	Clostridia	Oscillospirales	Oscillospiraceae	Evtepia	Evtepia gabavorous
BAK_63	BAK	BAK_b34582_1	33.6	2750446	3	87.38	1.17	FALSE	ok	s		4	2	0	0	Firmicutes_A	Clostridia	Lachnospirales	Lachnospiraceae	Ruminococcus_B	Ruminococcus_B gnavus
BAK_64	BAK	BAK_b5311_1	33.1	2584653	0	85.71	2.69	FALSE	none			0	0	0	0	Firmicutes_A	Clostridia	Lachnospirales	Lachnospiraceae	Eisenbergiella	Eisenbergiella sp900066775
BAK_65	BAK	BAK_b16832_1	31.8	2751526	0	88.14	3.04	FALSE	none	s		0	0	0	0	Firmicutes_A	Clostridia	Lachnospirales	Lachnospiraceae	Butyribacter	Butyribacter sp003524945
BAK_66	BAK	BAK_b1953_1	31.8	1712442	0	53.83	0	FALSE	none			0	0	0	0	Firmicutes_A	Clostridia	Lachnospirales	Lachnospiraceae	Choladocola	Choladocola sp003480725
BAK_67	BAK	BAK_b38395_1	31.8	2567989	2	94.09	1.01	FALSE	ok	s		7	1	0	0	Firmicutes_A	Clostridia	Lachnospirales	Lachnospiraceae	Eubacterium_G	Eubacterium_G sp000435815
BAK_68	BAK	BAK_b26470	31.3	2653356	0	65.79	0.88	FALSE	none	s		0	0	0	0	Firmicutes_A	Clostridia	Lachnospirales	Lachnospiraceae	Roseburia	Roseburia hominis
BAK_69	BAK	BAK_b37817	30.5	2900975	0	84.4	2.82	FALSE	none			0	0	0	0	Firmicutes_A	Clostridia	Oscillospirales	Oscillospiraceae	Flavonifractor	Flavonifractor plautii
BAK_70	BAK	BAK_b22984_1	28.9	2789215	0	67.41	3.51	FALSE	none	s		0	0	0	0	Firmicutes_A	Clostridia	Lachnospirales	Lachnospiraceae	Limivivens	Limivivens sp900543575
BAK_71	BAK	BAK_b3675	28.7	2447566	0	91.08	0.34	FALSE	none	a		0	0	0	0	Firmicutes_A	Clostridia	Oscillospirales	Ruminococcaceae	CAG-115	CAG-115 sp003531585
BAK_72	BAK	BAK_b12268_1	27.6	2759836	0	69.78	1.21	FALSE	none			0	0	0	0	Actinobacteriota	Coriobacteriia	Coriobacteriales	Eggerthellaceae	Eggerthella	Eggerthella lenta
BAK_73	BAK	BAK_b17490_1	26.7	1891301	0	50	0	FALSE	none			0	0	0	0	Firmicutes	Bacilli	Erysipelotrichales	Coprobacillaceae	Faecalibacillus	Faecalibacillus intestinalis
BAK_74	BAK	BAK_b20066_1	25.6	2370516	0	60.69	1.72	FALSE	none			0	0	0	0	Firmicutes_A	Clostridia	Oscillospirales	Oscillospiraceae	Lawsonibacter	Lawsonibacter asaccharolyticus
BAK_75	BAK	BAK_b24374_1	24.2	2843232	0	81.87	5.26	FALSE	none	s		0	0	0	0	Firmicutes_A	Clostridia	Lachnospirales	Lachnospiraceae	Coprococcus_A	Coprococcus_A catus
BAK_76	BAK	BAK_b35807_1	22.5	2091200	2	74.49	3.48	FALSE	ok			2	1	0	0	Firmicutes_A	Clostridia	Lachnospirales	Lachnospiraceae	Clostridium_Q	Clostridium_Q fessum
BAK_77	BAK	BAK_b6215	22.1	1440700	0	52.23	1.72	FALSE	none			0	0	0	0	Firmicutes_A	Clostridia	Oscillospirales	Oscillospiraceae	CAG-170	CAG-170 sp900553545
BAK_78	BAK	BAK_b20099	20.7	1792825	0	69.89	6.1	FALSE	none			0	0	0	0	Firmicutes_A	Clostridia	Oscillospirales	Oscillospiraceae	Faecousia	Faecousia sp003525905
BAK_79	BAK	BAK_b9972	19	2045866	0	60.53	5.26	FALSE	none			0	0	0	0	Firmicutes_A	Clostridia	Lachnospirales	Lachnospiraceae	Lachnoclostridium_B	Lachnoclostridium_B sp900066555
BAK_80	BAK	BAK_b26722	18.1	1928186	0	72.62	3.91	FALSE	none	a		0	0	0	0	Firmicutes_A	Clostridia	Oscillospirales	Oscillospiraceae	UBA738	UBA738 sp003522945
BAK_81	BAK	BAK_b27543	16.1	2647216	0	66.31	1.09	FALSE	none	s		0	0	0	0	Bacteroidota	Bacteroidia	Bacteroidales	Marinifilaceae	Butyricimonas	Butyricimonas paravirosa
BAK_82	BAK	BAK_b16455_1	16	2224702	0	76.67	1.27	FALSE	none			0	0	0	0	Firmicutes_A	Clostridia	Lachnospirales	Lachnospiraceae	Pseudolachnospira	Pseudolachnospira sp.
BAK_83	BAK	BAK_b23871	13.7	1906372	0	77.36	2.4	FALSE	none			0	0	0	0	Bacteroidota	Bacteroidia	Bacteroidales	Rikenellaceae	Alistipes_A	Alistipes_A ihumii
BAK_84	BAK	BAK_b28963_2	13.7	1086623	0	53.37	0	FALSE	none			0	0	0	0	Firmicutes_A	Clostridia	Oscillospirales	Oscillospiraceae	Faecousia	Faecousia sp.
BAK_85	BAK	BAK_b22428	13.5	2603913	0	61.54	1.72	FALSE	none			0	0	0	0	Bacteroidota	Bacteroidia	Bacteroidales	Marinifilaceae	Odoribacter	Odoribacter sp900544025
BAK_86	BAK	BAK_b27439_1	12.5	1267847	0	60.42	0	FALSE	none	s		0	0	0	0	Firmicutes	Bacilli	Lactobacillales	Lactobacillaceae	Pediococcus	Pediococcus acidilactici_A
BAL_1	BAL	BAL_b46850_1	488.9	1495041	0	64.19	0	TRUE	too_many	s		0	0	0	0	Firmicutes_A	Clostridia	Lachnospirales	Lachnospiraceae	Agathobacter	Agathobacter rectalis
BAL_2	BAL	BAL_b12583_1	465.8	1694193	6	50	0	TRUE	ok			39	29	2	2	Firmicutes_A	Clostridia	Oscillospirales	Ruminococcaceae	Faecalibacterium	Faecalibacterium prausnitzii_G
BAL_3	BAL	BAL_b4447_1	404.3	4898061	2	75.66	0	FALSE	ok			53	54	48	50	Bacteroidota	Bacteroidia	Bacteroidales	Bacteroidaceae	Bacteroides	Bacteroides salyersiae
BAL_4	BAL	BAL_b32621_1	365.4	2837288	3	92.37	3.16	TRUE	ok	s		421	224	0	0	Firmicutes_A	Clostridia	Lachnospirales	Lachnospiraceae	Fusicatenibacter	Fusicatenibacter saccharivorans
BAL_5	BAL	BAL_b31078_1	316.8	3312319	4	93.17	3.26	TRUE	ok			39	9	0	0	Firmicutes_A	Clostridia	Lachnospirales	Lachnospiraceae	Roseburia	Roseburia intestinalis
BAL_6	BAL	BAL_b63522_1	287.9	2441140	0	89.51	3.22	TRUE	too_many			0	0	0	0	Firmicutes_A	Clostridia	Lachnospirales	Lachnospiraceae	Agathobacter	Agathobacter faecis
BAL_7	BAL	BAL_b1228_1	271.9	2502790	3	85.09	0	TRUE	ok			35	4	0	0	Firmicutes_A	Clostridia	Lachnospirales	Lachnospiraceae	Blautia_A	Blautia_A sp000436615
BAL_8	BAL	BAL_b30399_1	244.9	4423448	0	84.36	2.3	TRUE	too_many	s		0	0	0	0	Bacteroidota	Bacteroidia	Bacteroidales	Bacteroidaceae	Phocaeicola	Phocaeicola dorei
BAL_9	BAL	BAL_b20735	243.4	2475784	2	91.03	0.19	TRUE	ok	s		2	3	0	0	Bacteroidota	Bacteroidia	Bacteroidales	Muribaculaceae	UBA7173	UBA7173 sp900548705
BAL_10	BAL	BAL_b12832_1	241.2	3450385	5	88.29	0.74	TRUE	ok	l		39	15	0	0	Bacteroidota	Bacteroidia	Bacteroidales	Bacteroidaceae	Phocaeicola	Phocaeicola massiliensis
BAL_11	BAL	BAL_b35996	237.1	2750785	2	97.62	0	FALSE	ok			1	2	0	0	Verrucomicrobiota	Verrucomicrobiae	Verrucomicrobiales	Akkermansiaceae	Akkermansia	Akkermansia muciniphila
BAL_12	BAL	BAL_b5465_1	219.3	2035892	0	82.79	0.68	TRUE	too_many	a		0	0	0	0	Firmicutes_A	Clostridia	Oscillospirales	Ruminococcaceae	Gemmiger	Gemmiger formicilis
BAL_13	BAL	BAL_b6755_1	210.4	3017419	0	57.92	0	TRUE	too_many	s		0	0	0	0	Bacteroidota	Bacteroidia	Bacteroidales	Bacteroidaceae	Bacteroides	Bacteroides uniformis
BAL_14	BAL	BAL_b51095_1	206.7	1551472	2	55.2	2.63	TRUE	ok			1	1	1	1	Firmicutes_A	Clostridia	Lachnospirales	Lachnospiraceae	Lachnospira	Lachnospira eligens_A
BAL_15	BAL	BAL_b51333	194.2	2497549	3	79.44	1.75	TRUE	ok	l		5	4	0	0	Firmicutes_A	Clostridia	Lachnospirales	Lachnospiraceae	Lachnospira	Lachnospira rogosae_A
BAL_16	BAL	BAL_b46121_1	193.5	2963533	3	65.67	1.72	TRUE	ok			65	21	0	0	Bacteroidota	Bacteroidia	Bacteroidales	Bacteroidaceae	Bacteroides	Bacteroides stercoris
BAL_17	BAL	BAL_b29976_2	183.8	2558402	0	95.95	0	FALSE	none	a		0	0	0	0	Firmicutes_A	Clostridia	Oscillospirales	Ruminococcaceae	Ruminococcus_D	Ruminococcus_D bicirculans
BAL_18	BAL	BAL_b33806_1	175.6	2909626	0	98.6	1.52	FALSE	none	s		0	0	0	0	Firmicutes_A	Clostridia	Christensenellales	CAG-74	UBA11524	UBA11524 sp000437595
BAL_19	BAL	BAL_b5106_1	170.5	2775225	3	92.55	3.09	FALSE	ok	s		17	3	1	1	Firmicutes_A	Clostridia	Lachnospirales	Lachnospiraceae	Eubacterium_I	Eubacterium_I ramulus
BAL_20	BAL	BAL_b20559_1	157.8	3116257	0	72.89	0	FALSE	too_many	s		0	0	0	0	Firmicutes_A	Clostridia	Lachnospirales	Lachnospiraceae	Blautia_A	Blautia_A sp900066145
BAL_21	BAL	BAL_b18780_1	154.7	3437915	2	88.66	5.54	TRUE	ok	s		32	32	1	1	Firmicutes_A	Clostridia	Lachnospirales	Lachnospiraceae	KLE1615	KLE1615 sp900066985
BAL_22	BAL	BAL_b10814_1	147.7	2481050	2	68.76	4.39	FALSE	ok	s		1	1	1	1	Firmicutes_A	Clostridia	Lachnospirales	Lachnospiraceae	Blautia_A	Blautia_A schinkii
BAL_23	BAL	BAL_b2137_2	140.4	2982669	3	93.99	2.68	TRUE	ok	s		13	5	4	2	Firmicutes_A	Clostridia	Lachnospirales	Lachnospiraceae	Butyribacter	Butyribacter sp000436755
BAL_24	BAL	BAL_b24235_1	138.4	1953963	0	50.88	1.75	TRUE	none			0	0	0	0	Firmicutes_A	Clostridia	Lachnospirales	Lachnospiraceae	Anaerostipes	Anaerostipes hadrus_A
BAL_25	BAL	BAL_b57139	136.5	2576138	0	84.67	2.07	FALSE	too_many	s		0	0	0	0	Firmicutes_A	Clostridia	Lachnospirales	Lachnospiraceae	Acetatifactor	Acetatifactor sp900066565
BAL_26	BAL	BAL_b44223_1	131.4	2750904	0	91.46	1.75	TRUE	none	s		0	0	0	0	Firmicutes_A	Clostridia	Lachnospirales	Lachnospiraceae	Blautia	Blautia stercoris
BAL_27	BAL	BAL_b3256_1	126.9	2099730	0	96.83	0	FALSE	none	a		0	0	0	0	Firmicutes_A	Clostridia	Oscillospirales	Acutalibacteraceae	Ruminococcus_E	Ruminococcus_E sp900314705
BAL_28	BAL	BAL_b27775_1	119	2059500	3	91.58	0.57	TRUE	ok	a		132	100	19	19	Firmicutes_A	Clostridia	Oscillospirales	Ruminococcaceae	Gemmiger	Gemmiger qucibialis
BAL_29	BAL	BAL_b817	117.2	2724056	0	92.48	0.34	FALSE	none			0	0	0	0	Firmicutes_A	Clostridia	Lachnospirales	Lachnospiraceae	Coprococcus	Coprococcus eutactus_A
BAL_30	BAL	BAL_b17528	107.4	2165572	0	92.65	0	FALSE	none	a		0	0	0	0	Firmicutes_A	Clostridia	Oscillospirales	Ruminococcaceae	Ruminococcus_C	Ruminococcus_C callidus
BAL_31	BAL	BAL_b7626	106.7	1874239	0	96.78	0	FALSE	none	a		0	0	0	0	Firmicutes_A	Clostridia	Oscillospirales	Acutalibacteraceae	Eubacterium_R	Eubacterium_R sp000434995
BAL_32	BAL	BAL_b52407_1	105.2	2307425	3	64.39	3.51	FALSE	ok			17	11	0	0	Firmicutes_A	Clostridia	Lachnospirales	Lachnospiraceae	Dorea_A	Dorea_A longicatena
BAL_33	BAL	BAL_b3722	103.9	3078520	0	91.27	1.59	FALSE	none	s		0	0	0	0	Bacteroidota	Bacteroidia	Bacteroidales	UBA932	Cryptobacteroides	Cryptobacteroides sp000433355
BAL_34	BAL	BAL_b18015_1	100.4	3355289	2	88.37	1.16	FALSE	ok	s		2	2	0	0	Firmicutes_A	Clostridia	Lachnospirales	Lachnospiraceae	Limivivens	Limivivens sp900543575
BAL_35	BAL	BAL_b58853	94.2	1610188	0	84.12	0	FALSE	none	s		0	0	0	0	Firmicutes_A	Clostridia	Christensenellales	CAG-917	CAG-475	CAG-475 sp900547975
BAL_36	BAL	BAL_b47254	89	1281764	0	67.31	0.28	TRUE	none			0	0	0	0	Actinobacteriota	Actinomycetia	Actinomycetales	Bifidobacteriaceae	Bifidobacterium	Bifidobacterium pseudocatenulatum
BAL_37	BAL	BAL_b4063_1	86.5	2544112	0	77.28	0.88	FALSE	none	s		0	0	0	0	Firmicutes_A	Clostridia	Lachnospirales	Lachnospiraceae	Oliverpabstia	Oliverpabstia intestinalis
BAL_38	BAL	BAL_b37800_1	86.2	1920768	0	88.73	4.8	FALSE	none	a		0	0	0	0	Firmicutes_A	Clostridia	Oscillospirales	Oscillospiraceae	CAG-103	CAG-103 sp900757655
BAL_39	BAL	BAL_b24293_1	72.8	2651589	3	69.81	0	FALSE	ok	s		6	4	0	0	Firmicutes_A	Clostridia	Lachnospirales	Lachnospiraceae	Agathobacter	Agathobacter sp905209075
BAL_40	BAL	BAL_b4618	71.8	2142921	0	98.81	0.88	FALSE	none			0	0	0	0	Actinobacteriota	Actinomycetia	Actinomycetales	Bifidobacteriaceae	Bifidobacterium	Bifidobacterium longum
BAL_41	BAL	BAL_b28961	70.3	2737090	2	91.93	5.27	FALSE	ok			2	1	0	0	Firmicutes_A	Clostridia	Lachnospirales	Lachnospiraceae	Copromonas	Copromonas sp900066535
BAL_42	BAL	BAL_b19784_1	69.8	2474143	2	86.67	2.63	FALSE	ok	s		8	2	4	1	Firmicutes_A	Clostridia	Lachnospirales	Lachnospiraceae	Dorea	Dorea formicigenerans
BAL_43	BAL	BAL_b3561_1	69.1	2618497	2	95.59	0.34	FALSE	ok	s		2	1	0	0	Firmicutes_A	Clostridia	Lachnospirales	Lachnospiraceae	Butyribacter	Butyribacter sp003529475
BAL_44	BAL	BAL_b3515_1	67.9	3009753	2	87.72	3.01	FALSE	ok			1	1	0	0	Firmicutes_A	Clostridia	Lachnospirales	Lachnospiraceae	Anaerobutyricum	Anaerobutyricum hallii
BAL_45	BAL	BAL_b1951_1	66.6	4107350	4	62.07	3.45	FALSE	ok			90	18	0	0	Bacteroidota	Bacteroidia	Bacteroidales	Bacteroidaceae	Bacteroides	Bacteroides caccae
BAL_46	BAL	BAL_b5984_1	65.6	2729023	0	96.49	1.01	FALSE	none	a		0	0	0	0	Firmicutes_A	Clostridia	UBA1381	UBA1381	CAG-41	CAG-41 sp900066215
BAL_47	BAL	BAL_b12825_1	62.9	2012054	0	99.82	1.03	FALSE	none	a		0	0	0	0	Firmicutes_A	Clostridia	Oscillospirales	Acutalibacteraceae	Ruminococcus_E	Ruminococcus_E bromii_B
BAL_48	BAL	BAL_b2262	61.8	1743396	0	97.85	1.37	FALSE	none	s		0	0	0	0	Proteobacteria	Alphaproteobacteria	RF32	CAG-239	Scatacola_A	Scatacola_A faecigallinarum
BAL_49	BAL	BAL_b29534_1	60.2	6197166	2	72.05	0	FALSE	ok	s		2	1	1	1	Bacteroidota	Bacteroidia	Bacteroidales	Bacteroidaceae	Bacteroides	Bacteroides cellulosilyticus
BAL_50	BAL	BAL_b60691_1	58.6	2526361	0	94.92	1.34	FALSE	none	s		0	0	0	0	Firmicutes_A	Clostridia	Lachnospirales	Lachnospiraceae	CAG-127	CAG-127 sp900319515
BAL_51	BAL	BAL_b34942_1	57.5	2101919	2	74.62	3.45	FALSE	ok	s		1	1	0	0	Firmicutes_A	Clostridia	Lachnospirales	Lachnospiraceae	Mediterraneibacter	Mediterraneibacter lactaris
BAL_52	BAL	BAL_b22462_1	57.3	1719970	0	62.38	0	FALSE	none			0	0	0	0	Firmicutes_A	Clostridia	Lachnospirales	Lachnospiraceae	Mediterraneibacter	Mediterraneibacter faecis
BAL_53	BAL	BAL_b21161	56.9	2021537	0	97.87	1.92	FALSE	none	s		0	0	0	0	Bacteroidota	Bacteroidia	Bacteroidales	Rikenellaceae	Alistipes	Alistipes putredinis
BAL_54	BAL	BAL_b37114	56.2	1719019	2	82.2	3.8	FALSE	ok			90	55	37	28	Firmicutes_A	Clostridia	Oscillospirales	Oscillospiraceae	ER4	ER4 sp000765235
BAL_55	BAL	BAL_b21620	55.8	1580388	0	58.23	1.72	FALSE	none			0	0	0	0	Firmicutes_A	Clostridia	Oscillospirales	Butyricicoccaceae	Agathobaculum	Agathobaculum sp003481705
BAL_56	BAL	BAL_b31200_1	52	2630662	0	95.33	2.18	FALSE	none	s		0	0	0	0	Firmicutes_A	Clostridia	Lachnospirales	Lachnospiraceae	Eubacterium_F	Eubacterium_F sp003491505
BAL_57	BAL	BAL_b12089_1	51.6	2889104	0	76.62	0	FALSE	none			0	0	0	0	Firmicutes_A	Clostridia	Lachnospirales	Lachnospiraceae	Marvinbryantia	Marvinbryantia sp014385005
BAL_58	BAL	BAL_b37135_1	51.6	2557390	0	90.75	3.76	FALSE	none	s		0	0	0	0	Firmicutes_A	Clostridia	Lachnospirales	Lachnospiraceae	RUG115	RUG115 sp900066395
BAL_59	BAL	BAL_b4941_1	51.1	2346408	0	88.9	1.66	FALSE	none			0	0	0	0	Firmicutes_A	Clostridia	Lachnospirales	Lachnospiraceae	Bariatricus	Bariatricus comes
BAL_60	BAL	BAL_b22650	48.3	2395896	0	95.49	0	FALSE	none	a		0	0	0	0	Firmicutes_A	Clostridia	Oscillospirales	Ruminococcaceae	Ruminiclostridium_E	Ruminiclostridium_E siraeum
BAL_61	BAL	BAL_b38564_1	46.9	1537333	0	75.68	1.72	FALSE	none			0	0	0	0	Firmicutes_A	Clostridia	Oscillospirales	Oscillospiraceae	CAG-83	CAG-83 sp000435975
BAL_62	BAL	BAL_b17309_1	46.5	1450113	0	82.83	4.06	FALSE	none	s		0	0	0	0	Firmicutes	Bacilli	Lactobacillales	Streptococcaceae	Streptococcus	Streptococcus thermophilus
BAL_63	BAL	BAL_b36667	45.8	2721234	2	98.76	0	FALSE	ok	s		6	2	0	0	Proteobacteria	Gammaproteobacteria	Burkholderiales	Burkholderiaceae	Sutterella	Sutterella wadsworthensis
BAL_64	BAL	BAL_b11969	41.8	2566646	2	91.13	0.61	FALSE	ok	s		3	1	0	0	Firmicutes_A	Clostridia	Lachnospirales	Lachnospiraceae	Eisenbergiella	Eisenbergiella sp900066775
BAL_65	BAL	BAL_b5121_1	41.3	2482962	0	74.39	1.75	FALSE	none	s		0	0	0	0	Firmicutes_A	Clostridia	Lachnospirales	Lachnospiraceae	UMGS1375	UMGS1375 sp900066615
BAL_66	BAL	BAL_b27650_1	39.9	2345801	0	52.63	0	FALSE	none	s		0	0	0	0	Firmicutes_A	Clostridia	Lachnospirales	Lachnospiraceae	Roseburia	Roseburia inulinivorans
BAL_67	BAL	BAL_b29504_1	39.6	2187381	0	78.05	0	FALSE	none			0	0	0	0	Firmicutes_A	Clostridia	Lachnospirales	Lachnospiraceae	Clostridium_Q	Clostridium_Q fessum
BAL_68	BAL	BAL_b42607	38.7	2009681	0	97.67	0.63	FALSE	none			0	0	0	0	Firmicutes_C	Negativicutes	Veillonellales	Dialisteraceae	Dialister	Dialister succinatiphilus
BAL_69	BAL	BAL_b22646	36.6	1809222	0	84.27	2.18	FALSE	none			0	0	0	0	Firmicutes_A	Clostridia	Oscillospirales	Oscillospiraceae	F23-B02	F23-B02 sp001916715
BAL_70	BAL	BAL_b35404_1	35.6	2446788	2	87.06	3.79	FALSE	ok	f		2	2	2	2	Actinobacteriota	Coriobacteriia	Coriobacteriales	Eggerthellaceae	Adlercreutzia	Adlercreutzia celatus_A
BAL_71	BAL	BAL_b224	35.2	2080540	0	98.55	0.17	FALSE	none	s		0	0	0	0	Firmicutes_C	Negativicutes	Selenomonadales	Selenomonadaceae	Mitsuokella	Mitsuokella jalaludinii
BAL_72	BAL	BAL_b31531_1	34.3	2651526	2	78.37	3.51	FALSE	ok	s		1	1	0	0	Firmicutes_A	Clostridia	Lachnospirales	Lachnospiraceae	Coprococcus_A	Coprococcus_A catus
BAL_73	BAL	BAL_b8428_1	34.1	2229226	0	58.93	0	FALSE	none			0	0	0	0	Firmicutes_A	Clostridia	Lachnospirales	Lachnospiraceae	Anaerobutyricum	Anaerobutyricum soehngenii
BAL_74	BAL	BAL_b22925_1	32.5	1791932	2	66.43	1.72	FALSE	ok	a		1	1	0	0	Firmicutes_A	Clostridia	Oscillospirales	Butyricicoccaceae	Agathobaculum	Agathobaculum butyriciproducens
BAL_75	BAL	BAL_b51467_2	31.9	2434234	0	92.33	0.67	FALSE	none	s		0	0	0	0	Firmicutes_A	Clostridia	Lachnospirales	Lachnospiraceae	Eubacterium_G	Eubacterium_G sp000435815
BAL_76	BAL	BAL_b27209_1	31.5	2043264	3	65.34	0	FALSE	ok			2	1	0	0	Firmicutes_A	Clostridia	Lachnospirales	Lachnospiraceae	UBA11774	UBA11774 sp003507655
BAL_77	BAL	BAL_b42762_1	31.1	1967543	0	84.72	3.24	FALSE	none			0	0	0	0	Firmicutes_A	Clostridia	Oscillospirales	Oscillospiraceae	Faecousia	Faecousia sp000434635
BAL_78	BAL	BAL_b22070	27.5	2617295	0	91.28	1.71	FALSE	none	s		0	0	0	0	Bacteroidota	Bacteroidia	Bacteroidales	Muribaculaceae	UBA7173	UBA7173 sp001915385
BAL_79	BAL	BAL_b1180_1	25.1	1561446	0	55.19	3.51	FALSE	none			0	0	0	0	Firmicutes_A	Clostridia	Lachnospirales	Lachnospiraceae	Choladocola	Choladocola sp003480725
BAL_80	BAL	BAL_b32024_1	21.6	1666242	0	75.81	0	FALSE	none	a		0	0	0	0	Firmicutes_A	Clostridia	Oscillospirales	Ruminococcaceae	Angelakisella	Angelakisella sp900547385
BAL_81	BAL	BAL_b43593	20	1918019	0	60.88	0	FALSE	none			0	0	0	0	Firmicutes_A	Clostridia	Lachnospirales	Lachnospiraceae	AM51-8	AM51-8 sp003478275
BAL_82	BAL	BAL_b15925_1	19.4	2350649	0	79.36	0.78	FALSE	none			0	0	0	0	Firmicutes_A	Clostridia	Oscillospirales	Oscillospiraceae	Lawsonibacter	Lawsonibacter asaccharolyticus
BAL_83	BAL	BAL_b47220_1	19.2	2025808	0	81.34	2.13	FALSE	none	s		0	0	0	0	Firmicutes_A	Clostridia	Lachnospirales	Lachnospiraceae	Eubacterium_F	Eubacterium_F sp000433735
BAL_84	BAL	BAL_b2973	18.7	2072953	0	87.23	1.22	FALSE	none	s		0	0	0	0	Cyanobacteria	Vampirovibrionia	Gastranaerophilales	Gastranaerophilaceae	CAG-196	CAG-196 sp002102975
BAL_85	BAL	BAL_b57835_1	17.9	2019089	0	94.64	9.22	FALSE	none	s		0	0	0	0	Proteobacteria	Alphaproteobacteria	RF32	CAG-239	CAJLXD01	CAJLXD01 sp900551585
BAL_86	BAL	BAL_b14114_1	17.6	3998870	0	88.22	2.12	FALSE	none	s		0	0	0	0	Bacteroidota	Bacteroidia	Bacteroidales	Tannerellaceae	Parabacteroides	Parabacteroides distasonis
BAL_87	BAL	BAL_b30447_1	17.6	2113423	0	62.73	6.9	FALSE	none			0	0	0	0	Firmicutes_A	Clostridia	Oscillospirales	Oscillospiraceae	Dysosmobacter	Dysosmobacter welbionis
BAL_88	BAL	BAL_b28045	16.6	1862321	0	88.49	0.22	FALSE	none			0	0	0	0	Firmicutes_A	Clostridia	Lachnospirales	Anaerotignaceae	Anaerotignum	Anaerotignum faecicola
BAL_89	BAL	BAL_b10179	16.4	1758212	0	78.02	0.67	FALSE	none	a		0	0	0	0	Firmicutes_A	Clostridia	Oscillospirales	Acutalibacteraceae	UBA1417	UBA1417 sp003531055
BAL_90	BAL	BAL_b37308	15.5	1683255	0	85.47	1.45	FALSE	none	t		0	0	0	0	Cyanobacteria	Vampirovibrionia	Gastranaerophilales	Gastranaerophilaceae	Stercorousia	Stercorousia sp900761225
BAL_91	BAL	BAL_b37796	15.5	2063568	0	94.29	0.62	FALSE	none	s		0	0	0	0	Proteobacteria	Gammaproteobacteria	Burkholderiales	Burkholderiaceae	Sutterella	Sutterella wadsworthensis_A
BAL_92	BAL	BAL_b35935	14.8	2297569	0	87.84	2.36	FALSE	none			0	0	0	0	Verrucomicrobiota	Verrucomicrobiae	Opitutales	CAG-312	Merdousia	Merdousia gallistercoris
BAL_93	BAL	BAL_b8368_1	14.2	1802673	0	79.95	2.6	FALSE	none			0	0	0	0	Firmicutes_A	Clostridia	Oscillospirales	Oscillospiraceae	Evtepia	Evtepia gabavorous
BAL_94	BAL	BAL_b12584	13.1	2004536	0	70.89	1.72	FALSE	none			0	0	0	0	Bacteroidota	Bacteroidia	Bacteroidales	Barnesiellaceae	Barnesiella	Barnesiella intestinihominis
BAL_95	BAL	BAL_b45639	13.1	1326105	0	74.08	1.08	FALSE	none			0	0	0	0	Proteobacteria	Alphaproteobacteria	RF32	CAG-239	Scatocola	Scatocola faecipullorum
BAL_96	BAL	BAL_b38660_1	13	2910313	0	59.48	0.86	FALSE	none			0	0	0	0	Bacteroidota	Bacteroidia	Bacteroidales	Tannerellaceae	Parabacteroides	Parabacteroides merdae
BAL_97	BAL	BAL_b14231	12.1	1294376	0	76.04	0	FALSE	none	t		0	0	0	0	Actinobacteriota	Coriobacteriia	Coriobacteriales	Eggerthellaceae	CAG-1427	CAG-1427 sp000435675
BAL_98	BAL	BAL_b10020_1	11.5	1545164	0	67.24	0.52	FALSE	none	s		0	0	0	0	Actinobacteriota	Coriobacteriia	Coriobacteriales	Eggerthellaceae	Slackia_A	Slackia_A isoflavoniconvertens
BAL_99	BAL	BAL_b11476	10.7	1201122	0	61.38	2.66	FALSE	none			0	0	0	0	Actinobacteriota	Coriobacteriia	Coriobacteriales	QAMH01	QAMH01	QAMH01 sp900544245
BAM_1	BAM	BAM_b20457	908.2	2639552	0	97.96	0.68	TRUE	none			0	0	0	0	Verrucomicrobiota	Verrucomicrobiae	Verrucomicrobiales	Akkermansiaceae	Akkermansia	Akkermansia muciniphila
BAM_2	BAM	BAM_b866	559.1	2537649	2	97.65	0	TRUE	ok	a		1	1	0	0	Firmicutes_A	Clostridia	Oscillospirales	Ruminococcaceae	Ruminiclostridium_E	Ruminiclostridium_E sp900539195
BAM_3	BAM	BAM_b49508_1	464	3001723	2	90.21	4.75	TRUE	ok	s		0	0	0	0	Firmicutes_A	Clostridia	Lachnospirales	Lachnospiraceae	Fusicatenibacter	Fusicatenibacter saccharivorans
BAM_4	BAM	BAM_b1280_1	444.1	1764709	4	72.93	1.01	TRUE	ok			26	20	0	0	Firmicutes_A	Clostridia	Oscillospirales	Oscillospiraceae	Faecousia	Faecousia sp000434635
BAM_5	BAM	BAM_b12614_1	418.9	2587697	3	98.66	2.37	TRUE	ok			4	2	0	0	Firmicutes_A	Clostridia	Lachnospirales	Lachnospiraceae	Anaerostipes	Anaerostipes hadrus
BAM_6	BAM	BAM_b46360	353.2	2754152	2	96.99	0.5	FALSE	ok			2	0	1	0	Firmicutes_A	Clostridia	Lachnospirales	Lachnospiraceae	CAG-127	CAG-127 sp.
BAM_7	BAM	BAM_b29635_1	302.2	3288936	6	98.23	1.35	TRUE	ok	s	s->f	14	15	1	1	Bacteroidota	Bacteroidia	Bacteroidales	Bacteroidaceae	Prevotella	Prevotella copri
BAM_8	BAM	BAM_b28554	296.7	1455564	3	92.64	0.77	TRUE	ok	s		5	5	0	0	Firmicutes_A	Clostridia	Christensenellales	CAG-917	CAG-349	CAG-349 sp003539515
BAM_9	BAM	BAM_b4159_1	271.1	3012926	0	98.19	2.1	FALSE	none	s		0	0	0	0	Firmicutes_A	Clostridia	Christensenellales	CAG-74	UBA11524	UBA11524 sp000437595
BAM_10	BAM	BAM_b2081_1	251.5	1927756	2	81.56	4.72	TRUE	ok			3	3	0	0	Firmicutes_A	Clostridia	Oscillospirales	Oscillospiraceae	CAG-83	CAG-83 sp000435555
BAM_11	BAM	BAM_b27762_1	241.1	6266525	0	95.41	0.39	TRUE	none	s		0	0	0	0	Bacteroidota	Bacteroidia	Bacteroidales	Bacteroidaceae	Bacteroides	Bacteroides cellulosilyticus
BAM_12	BAM	BAM_b4533	229.7	4164634	2	92.82	1.06	TRUE	ok			3	1	0	0	Firmicutes_A	Clostridia	Lachnospirales	Lachnospiraceae	Marvinbryantia	Marvinbryantia sp900550755
BAM_13	BAM	BAM_b47724_1	224.1	1830745	3	61.16	1.72	FALSE	ok			219	124	1	1	Firmicutes_A	Clostridia	Oscillospirales	Oscillospiraceae	CAG-170	CAG-170 sp000432135
BAM_14	BAM	BAM_b32674_1	214.3	4564730	4	86.55	2.59	TRUE	ok	s	s->f	26	24	0	0	Bacteroidota	Bacteroidia	Bacteroidales	Bacteroidaceae	Phocaeicola	Phocaeicola vulgatus
BAM_15	BAM	BAM_b2259_1	178.8	2739408	2	98.03	2.2	TRUE	ok	s		10	2	0	0	Firmicutes_A	Clostridia	Lachnospirales	Lachnospiraceae	Anaerobutyricum	Anaerobutyricum soehngenii
BAM_16	BAM	BAM_b40715_1	173.2	2622602	3	95.68	1.27	FALSE	ok	s		11	2	0	0	Firmicutes_A	Clostridia	Lachnospirales	Lachnospiraceae	Lachnospira	Lachnospira eligens
BAM_17	BAM	BAM_b70876	170.1	1661626	0	98.4	0	TRUE	none			0	0	0	0	missing	missing	missing	missing	missing	missing
BAM_18	BAM	BAM_b15143_1	168.7	3394561	4	86.76	3.85	TRUE	ok			18	13	0	0	Firmicutes_A	Clostridia	Lachnospirales	Lachnospiraceae	Blautia_A	Blautia_A wexlerae
BAM_19	BAM	BAM_b14554	158.1	2489636	4	85.6	1.75	TRUE	ok	s		8	8	1	1	Firmicutes_A	Clostridia	Lachnospirales	Lachnospiraceae	Bacteroides_F	Bacteroides_F pectinophilus
BAM_20	BAM	BAM_b55567_1	149.2	2952612	3	97.5	0.69	TRUE	ok	s	s->l	2	2	0	0	Firmicutes_A	Clostridia	Lachnospirales	Lachnospiraceae	CAG-882	CAG-882 sp000435595
BAM_21	BAM	BAM_b7082_1	140.4	2712491	3	92.2	2.42	FALSE	ok			216	63	0	0	Firmicutes_A	Clostridia	Lachnospirales	Lachnospiraceae	CAG-95	CAG-95 sp900066375
BAM_22	BAM	BAM_b13727_1	133.6	1619710	3	89.36	2.01	TRUE	ok	a		3	4	0	0	Firmicutes_A	Clostridia	Oscillospirales	Oscillospiraceae	ER4	ER4 sp900317525
BAM_23	BAM	BAM_b24811	127.3	2391269	0	92.78	0	FALSE	none			0	0	0	0	Firmicutes_A	Clostridia	Lachnospirales	Lachnospiraceae	V9D3004	V9D3004 sp900760345
BAM_24	BAM	BAM_b36434	123.6	1887518	0	93.94	1.34	TRUE	none	t		0	0	0	0	Firmicutes_A	Clostridia	Christensenellales	CAG-138	PeH17	PeH17 sp000435055
BAM_25	BAM	BAM_b600_1	122.7	3118023	2	93.74	2.11	FALSE	ok	s		1	1	0	0	Firmicutes_A	Clostridia	Lachnospirales	Lachnospiraceae	Blautia_A	Blautia_A sp900066335
BAM_26	BAM	BAM_b2537_1	118.1	3613849	2	87.42	1.78	TRUE	ok	s		1	1	0	0	Bacteroidota	Bacteroidia	Bacteroidales	Bacteroidaceae	Bacteroides	Bacteroides uniformis
BAM_27	BAM	BAM_b559_1	117.4	1865580	0	97.32	0	FALSE	none	a		0	0	0	0	Firmicutes_A	Clostridia	Oscillospirales	Acutalibacteraceae	Eubacterium_R	Eubacterium_R sp003526845
BAM_28	BAM	BAM_b57154_1	116.8	2610173	0	95.67	3.52	FALSE	none	q		0	0	0	0	Firmicutes_A	Clostridia	Oscillospirales	Oscillospiraceae	Faecousia	Faecousia sp000435995
BAM_29	BAM	BAM_b35382	110.8	1429681	0	93.95	0.81	TRUE	none	s		0	0	0	0	Firmicutes_A	Clostridia	Christensenellales	CAG-314	CAG-314	CAG-314 sp000437915
BAM_30	BAM	BAM_b4720	105.5	1898154	0	98.56	0.22	TRUE	none	s		0	0	0	0	Firmicutes	Bacilli	Acholeplasmatales	Anaeroplasmataceae	Anaeroplasma	Anaeroplasma sp.
BAM_31	BAM	BAM_b7289_1	104.4	2296275	2	94.61	2.49	FALSE	ok	a		2	1	0	0	Firmicutes_A	Clostridia	Oscillospirales	Oscillospiraceae	Onthomonas	Onthomonas sp.
BAM_32	BAM	BAM_b735_1	93.4	2738358	0	50.34	6.9	FALSE	none			0	0	0	0	Firmicutes_A	Clostridia	Oscillospirales	Oscillospiraceae	Dysosmobacter	Dysosmobacter sp.
BAM_33	BAM	BAM_b4435	91.6	1622324	3	85.46	0.67	TRUE	ok	s		2	2	0	0	Firmicutes_A	Clostridia	Christensenellales	CAG-917	CAG-475	CAG-475 sp.
BAM_34	BAM	BAM_b47382	90.4	2463432	3	93.82	5.59	FALSE	ok	s		11	11	0	0	Firmicutes_A	Clostridia	Christensenellales	CAG-74	Ventricola	Ventricola sp900542395
BAM_35	BAM	BAM_b73433_1	87.2	2270672	2	87.83	1.68	FALSE	ok			1	2	0	0	Firmicutes_A	Clostridia	Oscillospirales	Oscillospiraceae	Enterenecus	Enterenecus faecium
BAM_36	BAM	BAM_b27741_1	85.5	4544845	0	94.48	3.01	FALSE	none	s		0	0	0	0	Firmicutes_A	Clostridia	Lachnospirales	Lachnospiraceae	CAG-56	CAG-56 sp900762665
BAM_37	BAM	BAM_b37054	83.5	1964496	0	98.6	1.38	FALSE	none	a		0	0	0	0	Firmicutes_A	Clostridia	Oscillospirales	Acutalibacteraceae	Ruminococcus_E	Ruminococcus_E bromii_B
BAM_38	BAM	BAM_b1415_1	82.6	2202598	2	89.31	2.24	FALSE	ok	a		1	1	0	0	Firmicutes_A	Clostridia	Oscillospirales	Oscillospiraceae	UBA738	UBA738 sp003522945
BAM_39	BAM	BAM_b48777_1	82.3	2302904	0	96.34	2.69	FALSE	none	f		0	0	0	0	Actinobacteriota	Coriobacteriia	Coriobacteriales	Eggerthellaceae	Ellagibacter	Ellagibacter isourolithinifaciens
BAM_40	BAM	BAM_b17563_1	80.8	2739367	0	99.05	0.67	TRUE	none	a		0	0	0	0	Firmicutes_A	Clostridia	Oscillospirales	Butyricicoccaceae	Butyricicoccus_A	Butyricicoccus_A sp.
BAM_41	BAM	BAM_b19100_1	76.6	2586952	2	84.9	1.83	FALSE	ok	s		8	3	0	0	Firmicutes_A	Clostridia	Lachnospirales	Lachnospiraceae	KLE1615	KLE1615 sp900066985
BAM_42	BAM	BAM_b64188_1	76.6	1788634	0	85.34	1.01	FALSE	none	a		0	0	0	0	Firmicutes_A	Clostridia	Oscillospirales	Oscillospiraceae	F23-B02	F23-B02 sp000431075
BAM_43	BAM	BAM_b19785	76.1	1840256	0	88.18	1.71	FALSE	none	t		0	0	0	0	Cyanobacteria	Vampirovibrionia	Gastranaerophilales	Gastranaerophilaceae	Gastranaerophilus	Gastranaerophilus phascolarctosicola
BAM_44	BAM	BAM_b46240_1	74.7	2161968	0	99.02	1.01	FALSE	none	a		0	0	0	0	Firmicutes_A	Clostridia	Oscillospirales	Acutalibacteraceae	UBA1417	UBA1417 sp003531055
BAM_45	BAM	BAM_b27445_1	74.5	1844992	0	78.63	1.51	FALSE	none	a		0	0	0	0	Firmicutes_A	Clostridia	Oscillospirales	Oscillospiraceae	Limivicinus	Limivicinus sp900547315
BAM_46	BAM	BAM_b46968_1	73.4	2528637	2	93.1	1.78	FALSE	ok	t		9	6	0	0	Bacteroidota	Bacteroidia	Bacteroidales	Rikenellaceae	Alistipes	Alistipes shahii
BAM_47	BAM	BAM_b15168_1	72.2	3199574	0	94.9	1.14	FALSE	none	s		0	0	0	0	Firmicutes_A	Clostridia	Lachnospirales	Lachnospiraceae	Butyribacter	Butyribacter intestini
BAM_48	BAM	BAM_b39861_1	71.1	1878303	2	98.97	0.12	FALSE	ok	i		1	1	0	0	Actinobacteriota	Coriobacteriia	Coriobacteriales	Eggerthellaceae	CAG-1427	CAG-1427 sp.
BAM_49	BAM	BAM_b66352	69.7	2189156	0	95.38	3.17	FALSE	none	s		0	0	0	0	Bacteroidota	Bacteroidia	Bacteroidales	Rikenellaceae	Alistipes	Alistipes putredinis
BAM_50	BAM	BAM_b23465	67.5	1963298	0	89.71	0.02	FALSE	too_many	a		0	0	0	0	Firmicutes_A	Clostridia	Oscillospirales	Ruminococcaceae	UBA1394	UBA1394 sp900066845
BAM_51	BAM	BAM_b22047_1	64.2	2045239	2	61.72	0	FALSE	ok			7	4	0	0	Firmicutes_A	Clostridia	Oscillospirales	Ruminococcaceae	Gemmiger	Gemmiger variabilis_B
BAM_52	BAM	BAM_b5164	63.1	2333341	2	99.98	1.5	FALSE	ok	t	t->i	1	1	1	1	Firmicutes_C	Negativicutes	Acidaminococcales	Acidaminococcaceae	Phascolarctobacterium	Phascolarctobacterium faecium
BAM_53	BAM	BAM_b22095_1	63	2907238	2	92.23	2.82	FALSE	ok	s		3	1	2	1	Firmicutes_A	Clostridia	Lachnospirales	Lachnospiraceae	Roseburia	Roseburia hominis
BAM_54	BAM	BAM_b15297	62.5	2669981	0	92.07	2.42	FALSE	none	s		0	0	0	0	Firmicutes_A	Clostridia	Lachnospirales	Lachnospiraceae	UBA11774	UBA11774 sp003507655
BAM_55	BAM	BAM_b36281	62.1	1405992	0	77.27	1.21	FALSE	none	s		0	0	0	0	Firmicutes_A	Clostridia	Christensenellales	CAG-138	SFEL01	SFEL01 sp004557245
BAM_56	BAM	BAM_b1081_1	61	1894933	0	77.32	2.35	FALSE	none			0	0	0	0	Firmicutes_A	Clostridia	Oscillospirales	Oscillospiraceae	Faecousia	Faecousia sp003525905
BAM_57	BAM	BAM_b71835	61	1478488	0	80.4	2.2	FALSE	none			0	0	0	0	Proteobacteria	Alphaproteobacteria	RF32	CAG-239	CAG-267	CAG-267 sp001917135
BAM_58	BAM	BAM_b70099_1	59.6	2077606	0	76.55	0.38	FALSE	none			0	0	0	0	Bacteroidota	Bacteroidia	Bacteroidales	Muribaculaceae	Paramuribaculum	Paramuribaculum sp009775605
BAM_59	BAM	BAM_b32101_1	58.9	2590768	0	83.61	1.24	FALSE	none	s		0	0	0	0	Firmicutes_A	Clostridia	Lachnospirales	Lachnospiraceae	Eubacterium_I	Eubacterium_I sp900546495
BAM_60	BAM	BAM_b24406_1	57.8	2288062	0	94.52	1.66	FALSE	none	a		0	0	0	0	Firmicutes_A	Clostridia	Oscillospirales	Butyricicoccaceae	Agathobaculum	Agathobaculum butyriciproducens
BAM_61	BAM	BAM_b51881	57.8	1845543	2	85.52	1.34	FALSE	ok	a		12	3	0	0	Firmicutes_A	Clostridia	Oscillospirales	Oscillospiraceae	F23-B02	F23-B02 sp001916715
BAM_62	BAM	BAM_b8112_1	57.1	2346020	3	78.03	2.68	FALSE	ok	a		7	3	0	0	Firmicutes_A	Clostridia	Oscillospirales	Ruminococcaceae	Gemmiger	Gemmiger qucibialis
BAM_63	BAM	BAM_b47495	56.8	1762086	0	98.88	1.24	FALSE	none	s		0	0	0	0	Firmicutes	Bacilli	RFN20	CAG-449	UBA3210	UBA3210 sp900755065
BAM_64	BAM	BAM_b21452	55.4	3147950	0	94.24	1.68	FALSE	none	l		0	0	0	0	Bacteroidota	Bacteroidia	Bacteroidales	Rikenellaceae	Alistipes	Alistipes onderdonkii
BAM_65	BAM	BAM_b62796	53.6	2216512	0	96.52	0.67	FALSE	none	a		0	0	0	0	Firmicutes_A	Clostridia	Oscillospirales	Ruminococcaceae	Ruminococcus_D	Ruminococcus_D sp900543145
BAM_66	BAM	BAM_b3749_1	52	2013423	0	87.37	1.36	FALSE	none	s		0	0	0	0	Cyanobacteria	Vampirovibrionia	Gastranaerophilales	Gastranaerophilaceae	Zag111	Zag111 sp.
BAM_67	BAM	BAM_b69741	51.4	3110977	0	98.12	0	FALSE	none	s		0	0	0	0	Bacteroidota	Bacteroidia	Bacteroidales	Barnesiellaceae	Barnesiella	Barnesiella intestinihominis
BAM_68	BAM	BAM_b79_1	50.6	1990233	0	86.51	4.02	FALSE	none	t		0	0	0	0	Cyanobacteria	Vampirovibrionia	Gastranaerophilales	Gastranaerophilaceae	Stercorousia	Stercorousia sp001917115
BAM_69	BAM	BAM_b16042_1	49.7	1420254	2	53.24	1.72	FALSE	ok			3	1	0	0	Firmicutes_A	Clostridia	Oscillospirales	Oscillospiraceae	CAG-83	CAG-83 sp900547745
BAM_70	BAM	BAM_b7491	48.8	4368419	0	91.46	0.13	FALSE	none	s		0	0	0	0	Bacteroidota	Bacteroidia	Bacteroidales	Tannerellaceae	Parabacteroides	Parabacteroides distasonis
BAM_71	BAM	BAM_b26207_1	48.4	2450209	0	91.24	2.63	FALSE	none	s		0	0	0	0	Firmicutes_A	Clostridia	Lachnospirales	Lachnospiraceae	Bariatricus	Bariatricus comes
BAM_72	BAM	BAM_b16319	47.2	2013074	0	90.03	3.51	FALSE	none	t		0	0	0	0	Cyanobacteria	Vampirovibrionia	Gastranaerophilales	RUG14156	Galligastranaerophilus_A	Galligastranaerophilus_A intestinigallinarum
BAM_73	BAM	BAM_b9759	46.6	3119099	0	97.09	1.34	FALSE	none	s		0	0	0	0	Firmicutes_A	Clostridia	Lachnospirales	Lachnospiraceae	CAG-590	CAG-590 sp900548855
BAM_74	BAM	BAM_b16896	45.7	1976288	0	98.39	0	FALSE	none	s		0	0	0	0	Firmicutes_A	Clostridia	Christensenellales	CAG-138	Phil1	Phil1 sp001940855
BAM_75	BAM	BAM_b74296_1	45.4	2740034	2	96.64	1.68	FALSE	ok	a		16	5	3	1	Firmicutes_A	Clostridia	UBA1381	UBA1381	CAG-41	CAG-41 sp900066215
BAM_76	BAM	BAM_b222_1	43.6	2033398	3	93.63	0.84	FALSE	ok	s		15	2	0	0	Firmicutes_A	Clostridia	Lachnospirales	Lachnospiraceae	Butyrivibrio_A	Butyrivibrio_A crossotus
BAM_77	BAM	BAM_b18377_1	43.5	2846702	0	93.46	4.79	FALSE	none	s		0	0	0	0	Firmicutes_A	Clostridia	Lachnospirales	Lachnospiraceae	Acetatifactor	Acetatifactor sp900755865
BAM_78	BAM	BAM_b47502_1	43.3	1361738	0	77.86	8.06	FALSE	none	a		0	0	0	0	Firmicutes_A	Clostridia	TANB77	CAG-508	CAG-273	CAG-273 sp003534295
BAM_79	BAM	BAM_b45814_1	41.9	2481329	0	96.42	0.34	FALSE	none	a		0	0	0	0	Firmicutes_A	Clostridia	Monoglobales	Monoglobaceae	Monoglobus	Monoglobus pectinilyticus
BAM_80	BAM	BAM_b27240_1	41.2	2720136	0	90.94	0.34	FALSE	none	s		0	0	0	0	Firmicutes_A	Clostridia	Lachnospirales	Lachnospiraceae	Butyribacter	Butyribacter sp003524945
BAM_81	BAM	BAM_b56543_1	40.6	2200526	0	93.56	0	FALSE	none	a		0	0	0	0	Firmicutes_A	Clostridia	Lachnospirales	Lachnospiraceae	Butyrivibrio_A	Butyrivibrio_A sp000431815
BAM_82	BAM	BAM_b18961	39.9	1837170	0	95.11	0	FALSE	none	s		0	0	0	0	Proteobacteria	Alphaproteobacteria	RF32	CAG-239	Scatocola	Scatocola faecipullorum
BAM_83	BAM	BAM_b77212_1	39.6	2265220	0	85.52	1.36	FALSE	none	s		0	0	0	0	Firmicutes_A	Clostridia	Oscillospirales	CAG-272	CAG-390	CAG-390 sp000437015
BAM_84	BAM	BAM_b4782_1	37.7	1352198	0	71.14	4.22	FALSE	none			0	0	0	0	Firmicutes_A	Clostridia	TANB77	CAG-508	CAG-273	CAG-273 sp902406115
BAM_85	BAM	BAM_b6378_1	37.6	3552651	0	78.62	0	FALSE	none	s		0	0	0	0	Bacteroidota	Bacteroidia	Bacteroidales	Bacteroidaceae	Phocaeicola	Phocaeicola plebeius_A
BAM_86	BAM	BAM_b19843	37.5	1716334	0	83.24	0.68	FALSE	none	a		0	0	0	0	Firmicutes_A	Clostridia	Oscillospirales	Ruminococcaceae	Angelakisella	Angelakisella sp900547385
BAM_87	BAM	BAM_b20740_1	36.9	2772209	0	82.79	1.34	FALSE	none			0	0	0	0	Actinobacteriota	Coriobacteriia	Coriobacteriales	Eggerthellaceae	CAAEEV01	CAAEEV01 sp.
BAM_88	BAM	BAM_b1858_1	36.8	2498503	0	91.08	2.87	FALSE	none			0	0	0	0	Firmicutes_A	Clostridia	Lachnospirales	Lachnospiraceae	RUG115	RUG115 sp900066395
BAM_89	BAM	BAM_b20754_1	34.8	2073053	0	87.36	2.91	FALSE	none	s		0	0	0	0	Firmicutes_A	Clostridia	Oscillospirales	Oscillospiraceae	Evtepia	Evtepia gabavorous
BAM_90	BAM	BAM_b61473_1	34.4	2697365	0	77.28	2.63	FALSE	none			0	0	0	0	Firmicutes_A	Clostridia	Lachnospirales	Lachnospiraceae	Blautia_A	Blautia_A obeum
BAM_91	BAM	BAM_b6356	33.7	2062444	0	81.04	0.38	FALSE	none			0	0	0	0	Bacteroidota	Bacteroidia	Bacteroidales	Muribaculaceae	UBA7173	UBA7173 sp004102805
BAM_92	BAM	BAM_b4339	33.4	2284509	0	98.05	0.14	FALSE	none	a		0	0	0	0	Proteobacteria	Gammaproteobacteria	Burkholderiales	Burkholderiaceae	Parasutterella	Parasutterella gallistercoris
BAM_93	BAM	BAM_b6870_1	33.3	2432735	0	63.83	1.75	FALSE	none			0	0	0	0	Firmicutes_A	Clostridia	Lachnospirales	Lachnospiraceae	Dorea_A	Dorea_A longicatena
BAM_94	BAM	BAM_b31206_1	33.2	2510055	0	92.72	2.73	FALSE	none	s		0	0	0	0	Firmicutes_A	Clostridia	Lachnospirales	Lachnospiraceae	Mediterraneibacter	Mediterraneibacter torques
BAM_95	BAM	BAM_b1330_1	32.6	4526276	0	92.11	3.8	FALSE	none	s		0	0	0	0	Firmicutes_A	Clostridia	Lachnospirales	Lachnospiraceae	TWA4	TWA4 sp.
BAM_96	BAM	BAM_b41115_1	31.6	2169398	0	70.45	6.9	FALSE	none	s		0	0	0	0	Firmicutes_A	Clostridia	Lachnospirales	Lachnospiraceae	Mediterraneibacter	Mediterraneibacter lactaris
BAM_97	BAM	BAM_b23236_1	29.5	1614869	0	55.52	0.86	FALSE	none			0	0	0	0	Firmicutes_A	Clostridia	Oscillospirales	Oscillospiraceae	CAG-170	CAG-170 sp000436735
BAM_98	BAM	BAM_b15702	29.4	2412527	0	86.18	0.67	FALSE	none			0	0	0	0	Firmicutes_A	Clostridia	Oscillospirales	CAG-272	UMGS1696	UMGS1696 sp900753285
BAM_99	BAM	BAM_b859_1	28.9	1761795	0	75.97	3.23	FALSE	none	s		0	0	0	0	Firmicutes_A	Clostridia	TANB77	CAG-508	Scatovivens	Scatovivens faecipullorum
BAM_100	BAM	BAM_b6733_1	28.5	1882413	0	69.59	3.61	FALSE	none	a		0	0	0	0	Firmicutes_A	Clostridia	Oscillospirales	Oscillospiraceae	Limivicinus	Limivicinus sp003150355
BAM_101	BAM	BAM_b37826	28.2	1623493	0	97.93	1	FALSE	none	i		0	0	0	0	Actinobacteriota	Coriobacteriia	Coriobacteriales	Eggerthellaceae	CAG-1427	CAG-1427 sp000435675
BAM_102	BAM	BAM_b20847_1	27.9	2680079	0	84.66	3.36	FALSE	none	a		0	0	0	0	Firmicutes_A	Clostridia	Oscillospirales	Oscillospiraceae	HGM13006	HGM13006 sp900757695
BAM_103	BAM	BAM_b21573_1	27.9	2081854	2	79.39	0.89	FALSE	ok	a		1	1	0	0	Firmicutes_A	Clostridia	Oscillospirales	Ruminococcaceae	Gemmiger	Gemmiger sp004555405
BAM_104	BAM	BAM_b58872	27.8	1304520	0	89.15	0.67	FALSE	none	t		0	0	0	0	Firmicutes_A	Clostridia	Oscillospirales	Acutalibacteraceae	CAG-557	CAG-557 sp.
BAM_105	BAM	BAM_b11355_1	27.4	2410327	0	74.29	1.72	FALSE	none			0	0	0	0	Firmicutes_A	Clostridia	Oscillospirales	Acutalibacteraceae	Acutalibacter	Acutalibacter ornithocaccae
BAM_106	BAM	BAM_b86760	26.7	1517866	0	59.75	3.45	FALSE	none			0	0	0	0	Firmicutes_A	Clostridia	Oscillospirales	Oscillospiraceae	ER4	ER4 sp000765235
BAM_107	BAM	BAM_b35410_1	26.6	2102289	0	52.93	0	FALSE	none			0	0	0	0	Firmicutes_A	Clostridia	Oscillospirales	Oscillospiraceae	Lawsonibacter	Lawsonibacter asaccharolyticus
BAM_108	BAM	BAM_b20967_1	26.5	3001008	0	67.5	5.26	FALSE	none	s		0	0	0	0	Firmicutes_A	Clostridia	Lachnospirales	Lachnospiraceae	Choladousia	Choladousia sp902363665
BAM_109	BAM	BAM_b10965	26.4	1767492	0	93.64	1.48	FALSE	none	a		0	0	0	0	Firmicutes_A	Clostridia	Oscillospirales	Acutalibacteraceae	CAG-217	CAG-217 sp000436335
BAM_110	BAM	BAM_b19072	25.1	1767718	0	50	0	FALSE	none			0	0	0	0	Firmicutes_A	Clostridia	Oscillospirales	Ruminococcaceae	Gemmiger	Gemmiger formicilis
BAM_111	BAM	BAM_b2763_1	24.5	4031335	0	90.02	4.9	FALSE	none			0	0	0	0	Firmicutes_A	Clostridia	Lachnospirales	Lachnospiraceae	Eisenbergiella	Eisenbergiella sp.
BAM_112	BAM	BAM_b554_1	24.4	1361608	0	85.84	1.85	FALSE	none	t		0	0	0	0	Firmicutes	Bacilli	RF39	UBA660	CAG-605	CAG-605 sp000433475
BAM_113	BAM	BAM_b21767_1	24.3	2039841	0	93.35	0	FALSE	none	s		0	0	0	0	Firmicutes_A	Clostridia	Oscillospirales	CAG-272	UMGS731	UMGS731 sp900544985
BAM_114	BAM	BAM_b20523_1	24.2	1512978	0	74.05	1.34	FALSE	none	s		0	0	0	0	Firmicutes_A	Clostridia	TANB77	CAG-508	CAG-245	CAG-245 sp000435175
BAM_115	BAM	BAM_b18494_1	23.6	2567884	0	64.86	0.88	FALSE	none	s		0	0	0	0	Firmicutes_A	Clostridia	Lachnospirales	Lachnospiraceae	CAG-303	CAG-303 sp000437755
BAM_116	BAM	BAM_b5966_1	23.6	2884740	0	87.98	0.67	FALSE	none			0	0	0	0	Firmicutes_A	Clostridia	Christensenellales	HGM11417	HGM11417	HGM11417 sp900761895
BAM_117	BAM	BAM_b20390	23.5	2046233	0	88.13	0.93	FALSE	none	t		0	0	0	0	Cyanobacteria	Vampirovibrionia	Gastranaerophilales	Gastranaerophilaceae	Spyradomonas	Spyradomonas excrementavium
BAM_118	BAM	BAM_b69663_1	23.4	2093408	0	81.99	4.72	FALSE	none			0	0	0	0	Firmicutes_A	Clostridia	Oscillospirales	Oscillospiraceae	CAG-103	CAG-103 sp.
BAM_119	BAM	BAM_b10527_1	23.3	3421722	2	61.88	1.75	FALSE	ok			1	1	0	0	Firmicutes_A	Clostridia	Lachnospirales	Lachnospiraceae	CAG-56	CAG-56 sp900752065
BAM_120	BAM	BAM_b50625_1	23.2	2334362	0	67.15	1.75	FALSE	none	s		0	0	0	0	Firmicutes_A	Clostridia	Lachnospirales	Lachnospiraceae	Dorea	Dorea formicigenerans
BAM_121	BAM	BAM_b13720_1	23	2725270	0	82.31	2.15	FALSE	none			0	0	0	0	Firmicutes_A	Clostridia	Lachnospirales	Lachnospiraceae	Lachnoclostridium_B	Lachnoclostridium_B sp900066765
BAM_122	BAM	BAM_b79976_1	23	2549115	0	94.53	4.72	FALSE	none	a		0	0	0	0	Firmicutes_A	Clostridia	Oscillospirales	Ruminococcaceae	Negativibacillus	Negativibacillus massiliensis
BAM_123	BAM	BAM_b31637_1	22.7	3031905	0	75.95	3.51	FALSE	none	s		0	0	0	0	Firmicutes_A	Clostridia	Lachnospirales	Lachnospiraceae	COE1	COE1 sp001916965
BAM_124	BAM	BAM_b39616_1	22.2	2426907	2	59.44	8.77	FALSE	ok			1	1	0	0	Firmicutes_A	Clostridia	Lachnospirales	Lachnospiraceae	Choladocola	Choladocola sp003480725
BAM_125	BAM	BAM_b21_1	21.5	1628087	0	95.05	0	FALSE	none	s		0	0	0	0	Proteobacteria	Alphaproteobacteria	RF32	UBA3637	RGIG4140	RGIG4140 sp.
BAM_126	BAM	BAM_b40267_1	21.1	3009190	0	63.99	0	FALSE	none			0	0	0	0	Firmicutes_A	Clostridia	Lachnospirales	Lachnospiraceae	Choladocola	Choladocola sp017558865
BAM_127	BAM	BAM_b33487_1	20.6	2242276	0	71.14	1.75	FALSE	none	s		0	0	0	0	Firmicutes_A	Clostridia	Lachnospirales	Lachnospiraceae	UBA11957	UBA11957 sp016301965
BAM_128	BAM	BAM_b531_1	20.5	4058948	0	94.73	1.34	FALSE	none	s		0	0	0	0	Bacteroidota	Bacteroidia	Bacteroidales	Marinifilaceae	Odoribacter	Odoribacter splanchnicus
BAM_129	BAM	BAM_b12194_1	20.1	1725744	0	53.61	6.9	FALSE	none			0	0	0	0	Firmicutes_A	Clostridia	Oscillospirales	Oscillospiraceae	Enterenecus	Enterenecus sp900549885
BAM_130	BAM	BAM_b47978_1	20.1	1843282	0	95.36	0.35	FALSE	none	s		0	0	0	0	Firmicutes_A	Clostridia	Peptostreptococcales	Anaerovoracaceae	Copromorpha	Copromorpha sp017416795
BAM_131	BAM	BAM_b21456_1	19.6	2225239	0	94.34	0.78	FALSE	none	a		0	0	0	0	Firmicutes_A	Clostridia	Oscillospirales	Ruminococcaceae	UBA866	UBA866 sp900543295
BAM_132	BAM	BAM_b39176_1	19.6	1835954	0	69.46	3.51	FALSE	none			0	0	0	0	Firmicutes_A	Clostridia	Lachnospirales	Lachnospiraceae	Agathobacter	Agathobacter rectalis
BAM_133	BAM	BAM_b1311_1	19.5	2201902	0	65.07	3.51	FALSE	none			0	0	0	0	Firmicutes_A	Clostridia	Lachnospirales	Lachnospiraceae	Lachnoclostridium_B	Lachnoclostridium_B sp900066555
BAM_134	BAM	BAM_b32663_1	19.4	3576870	0	66.78	2.63	FALSE	none			0	0	0	0	Firmicutes_A	Clostridia	Lachnospirales	Lachnospiraceae	14-2	14-2 sp.
BAM_135	BAM	BAM_b54689_1	19.4	2836956	0	88.15	4.42	FALSE	none	s		0	0	0	0	Firmicutes_A	Clostridia	Lachnospirales	Lachnospiraceae	Anaerobutyricum	Anaerobutyricum sp.
BAM_136	BAM	BAM_b19828_1	19.3	2120080	0	50.77	0.91	FALSE	none			0	0	0	0	Firmicutes_A	Clostridia	Christensenellales	CAG-74	Ventricola	Ventricola sp900548125
BAM_137	BAM	BAM_b27506_1	19.2	2231151	0	88.04	0.49	FALSE	none			0	0	0	0	Firmicutes_A	Clostridia	Oscillospirales	Ruminococcaceae	Fimivivens	Fimivivens sp014385025
BAM_138	BAM	BAM_b72096_1	18.7	2017830	0	90.85	1.23	FALSE	none	a		0	0	0	0	Firmicutes_A	Clostridia	Oscillospirales	Acutalibacteraceae	CAG-488	CAG-488 sp000434055
BAM_139	BAM	BAM_b17631_1	18.4	2434879	0	89.84	2.56	FALSE	none	l		0	0	0	0	Bacteroidota	Bacteroidia	Bacteroidales	Rikenellaceae	Alistipes_A	Alistipes_A ihumii
BAM_140	BAM	BAM_b55900_1	18.4	1985025	0	58.35	1.75	FALSE	none			0	0	0	0	Firmicutes_A	Clostridia	Lachnospirales	Lachnospiraceae	JAGTTR01	JAGTTR01 sp018223385
BAM_141	BAM	BAM_b54047_1	18.3	2835832	2	65.62	0	FALSE	ok	s		3	1	0	0	Firmicutes_A	Clostridia	Lachnospirales	Lachnospiraceae	CAG-411	CAG-411 sp000437275
BAM_142	BAM	BAM_b14166_1	18.2	2381682	0	51.75	0	FALSE	none	s		0	0	0	0	Firmicutes_A	Clostridia	Lachnospirales	Lachnospiraceae	Choladousia	Choladousia sp902363135
BAM_143	BAM	BAM_b37912_1	17.4	1204584	0	83.33	8.59	FALSE	none			0	0	0	0	Firmicutes	Bacilli	RF39	UBA660	Onthocola_B	Onthocola_B sp900551525
BAM_144	BAM	BAM_b35429_1	17.1	2025624	0	93.57	3.71	FALSE	none	a		0	0	0	0	Firmicutes_A	Clostridia	UMGS1883	UMGS1883	missing	missing
BAM_145	BAM	BAM_b16374_1	16.8	2275331	0	52.09	7.02	FALSE	none	s		0	0	0	0	Firmicutes_A	Clostridia	Lachnospirales	Lachnospiraceae	Ventrimonas	Ventrimonas sp900555625
BAM_146	BAM	BAM_b40949_1	16.4	1173014	0	81.64	4.11	FALSE	none			0	0	0	0	Firmicutes	Bacilli	RF39	UBA660	UMGS995	UMGS995 sp900547465
BAM_147	BAM	BAM_b65573_1	16.3	1711886	0	78.46	1.64	FALSE	none	a		0	0	0	0	Firmicutes_A	Clostridia	Oscillospirales	Acutalibacteraceae	CAG-177	CAG-177 sp003514385
BAM_148	BAM	BAM_b33042	16.1	2146149	2	64.4	2.02	FALSE	ok	s		1	1	1	1	Firmicutes_A	Clostridia	Christensenellales	CAG-74	Alectryocaccomicrobium	Alectryocaccomicrobium faecavium
BAM_149	BAM	BAM_b88969_1	16	1063819	0	51.44	3.51	FALSE	none	s		0	0	0	0	Firmicutes_A	Clostridia	TANB77	CAG-508	CAG-269	CAG-269 sp905213875
BAM_150	BAM	BAM_b77183_1	15.9	2781559	0	65.9	0	FALSE	none			0	0	0	0	Firmicutes_A	Clostridia	Lachnospirales	Lachnospiraceae	missing	missing
BAM_151	BAM	BAM_b33544_1	14.7	1154051	0	60.76	2.1	FALSE	none			0	0	0	0	Firmicutes_A	Clostridia	TANB77	CAG-508	CAG-273	CAG-273 sp900752335
BAM_152	BAM	BAM_b60524_1	14	1510962	0	75.91	1.8	FALSE	none			0	0	0	0	Firmicutes_A	Clostridia	Peptostreptococcales	Anaerovoracaceae	Copromorpha	Copromorpha sp900549125
BAM_153	BAM	BAM_b8469_1	13.9	1601034	0	74.39	1.8	FALSE	none	t		0	0	0	0	Cyanobacteria	Vampirovibrionia	Gastranaerophilales	Gastranaerophilaceae	Avigastranaerophilus	Avigastranaerophilus sp017403285
BAM_154	BAM	BAM_b28637_1	13.8	917758	0	50.8	1.75	FALSE	none			0	0	0	0	Firmicutes_A	Clostridia	TANB77	CAG-508	CAG-269	CAG-269 sp001916005
BAM_155	BAM	BAM_b71646_1	13.8	2538421	0	57.66	3.51	FALSE	none			0	0	0	0	Firmicutes_A	Clostridia	Lachnospirales	Lachnospiraceae	missing	missing
BAM_156	BAM	BAM_b17784_1	13.7	2262265	0	71.73	2.59	FALSE	none	i		0	0	0	0	Firmicutes_B	Peptococcia	Peptococcales	Peptococcaceae	UBA7185	UBA7185 sp.
BAM_157	BAM	BAM_b35941	13.6	1419476	0	73.51	0.94	FALSE	none			0	0	0	0	Firmicutes_A	Clostridia	Christensenellales	Borkfalkiaceae	UMGS621	UMGS621 sp900543915
BAM_158	BAM	BAM_b4904_1	13.5	1494314	0	64.94	1.72	FALSE	none	t		0	0	0	0	Cyanobacteria	Vampirovibrionia	Gastranaerophilales	Gastranaerophilaceae	Scatousia	Scatousia sp.
BAM_159	BAM	BAM_b20315	13.2	1617429	0	66.75	1.91	FALSE	none	s		0	0	0	0	Firmicutes_A	Clostridia	Christensenellales	Borkfalkiaceae	Borkfalkia	Borkfalkia ceftriaxoniphila
BAM_160	BAM	BAM_b37960	13.1	1212248	0	62.42	0.1	FALSE	none	s		0	0	0	0	Firmicutes_A	Clostridia	Christensenellales	Borkfalkiaceae	Gallimonas	Gallimonas sp910586825
BAM_161	BAM	BAM_b2742_1	12.9	1570797	0	64.07	0.84	FALSE	none			0	0	0	0	Firmicutes_A	Clostridia	Lachnospirales	CAG-274	missing	missing
BAM_162	BAM	BAM_b24145_1	12.7	1214916	0	56.95	0	FALSE	none			0	0	0	0	Firmicutes_A	Clostridia	Lachnospirales	Anaerotignaceae	Anaerotignum	Anaerotignum faecicola
BAM_163	BAM	BAM_b3842_1	12.4	1635119	0	64.96	0.89	FALSE	none	a		0	0	0	0	Firmicutes_A	Clostridia	Lachnospirales	CAG-274	HGM11788	HGM11788 sp900760465
BAM_164	BAM	BAM_b34750_1	12.2	1153356	0	59.31	4.14	FALSE	none	s		0	0	0	0	Firmicutes	Bacilli	RFN20	CAG-449	CAG-449	CAG-449 sp.
BAM_165	BAM	BAM_b29789_1	12	1073622	0	72.15	0.68	FALSE	none			0	0	0	0	Firmicutes	Bacilli	ML615J-28	CAG-313	CAG-313	CAG-313 sp000433035
BAM_166	BAM	BAM_b32532_1	12	2049783	0	59.91	4.72	FALSE	none	s		0	0	0	0	Firmicutes	Bacilli	Erysipelotrichales	Coprobacillaceae	Faecalibacillus	Faecalibacillus spiroforme_A
BAN_1	BAN	BAN_b5802_1	2299.9	2466186	0	89.76	1.18	TRUE	too_many	f		0	0	0	0	Bacteroidota	Bacteroidia	Bacteroidales	Bacteroidaceae	Prevotella	Prevotella copri
BAN_2	BAN	BAN_b22657_1	424.4	3408662	0	95.98	0.19	TRUE	too_many	f		0	0	0	0	Bacteroidota	Bacteroidia	Bacteroidales	Bacteroidaceae	Phocaeicola	Phocaeicola vulgatus
BAN_3	BAN	BAN_b47892_1	284	2707359	3	78.81	1.75	TRUE	ok	s		6	3	0	0	Firmicutes_A	Clostridia	Lachnospirales	Lachnospiraceae	Agathobacter	Agathobacter rectalis
BAN_4	BAN	BAN_b24844	250.5	2141453	2	95.84	0.67	TRUE	ok	a		1	1	0	0	Firmicutes_A	Clostridia	Oscillospirales	Acutalibacteraceae	CAG-177	CAG-177 sp003514385
BAN_5	BAN	BAN_b2187_1	226.7	5801185	0	76.21	0.86	FALSE	too_many	s		0	0	0	0	Bacteroidota	Bacteroidia	Bacteroidales	Bacteroidaceae	Bacteroides	Bacteroides ovatus
BAN_6	BAN	BAN_b49448_1	223.3	2643094	4	92.19	2.53	TRUE	ok	s		19	19	1	1	Firmicutes_A	Clostridia	Lachnospirales	Lachnospiraceae	Fusicatenibacter	Fusicatenibacter saccharivorans
BAN_7	BAN	BAN_b45265_1	189.8	2651391	0	89.26	2.55	FALSE	none			0	0	0	0	Firmicutes_A	Clostridia	Lachnospirales	Lachnospiraceae	Eubacterium_I	Eubacterium_I ramulus
BAN_8	BAN	BAN_b39514_2	189.3	2443700	4	72.41	2.63	TRUE	ok	s		90	52	0	0	Firmicutes_A	Clostridia	Lachnospirales	Lachnospiraceae	Dorea_A	Dorea_A longicatena
BAN_9	BAN	BAN_b737_1	185.5	2062994	4	86.95	0.8	TRUE	ok			6	7	0	0	Firmicutes_A	Clostridia	Lachnospirales	Lachnospiraceae	Mediterraneibacter	Mediterraneibacter faecis
BAN_10	BAN	BAN_b14079_1	169.5	2067919	3	57.95	7.14	TRUE	ok			13	9	0	0	Firmicutes_A	Clostridia	Oscillospirales	Ruminococcaceae	Gemmiger	Gemmiger sp900540595
BAN_11	BAN	BAN_b43128_1	169	2592167	3	85.86	0.63	TRUE	ok			14	9	0	0	Firmicutes_A	Clostridia	Lachnospirales	Lachnospiraceae	Blautia_A	Blautia_A massiliensis
BAN_12	BAN	BAN_b34448_1	156.6	3870148	3	75.5	0	FALSE	ok	l		13	11	0	0	Bacteroidota	Bacteroidia	Bacteroidales	Bacteroidaceae	Bacteroides	Bacteroides uniformis
BAN_13	BAN	BAN_b20341_2	154.5	2829123	2	92.02	5.84	FALSE	ok	s		1	1	0	0	Firmicutes_A	Clostridia	Lachnospirales	Lachnospiraceae	Agathobacter	Agathobacter faecis
BAN_14	BAN	BAN_b28357_1	134.5	2572755	2	78.36	2.63	FALSE	ok	s		41	30	2	1	Firmicutes_A	Clostridia	Lachnospirales	Lachnospiraceae	Oliverpabstia	Oliverpabstia intestinalis
BAN_15	BAN	BAN_b31285_1	127.3	2702985	4	71.71	3.51	TRUE	ok			8	5	0	0	Firmicutes_A	Clostridia	Lachnospirales	Lachnospiraceae	Blautia_A	Blautia_A wexlerae
BAN_16	BAN	BAN_b43721_1	122.2	2009298	2	93.66	4.52	TRUE	ok	a		7	1	0	0	Actinobacteriota	Actinomycetia	Actinomycetales	Bifidobacteriaceae	Bifidobacterium	Bifidobacterium bifidum
BAN_17	BAN	BAN_b14999	118.7	2157892	0	95.54	3.46	TRUE	none	s		0	0	0	0	Bacteroidota	Bacteroidia	Bacteroidales	Rikenellaceae	Alistipes	Alistipes putredinis
BAN_18	BAN	BAN_b39516_1	114.6	2027615	3	82.91	1.17	TRUE	ok			258	194	2	2	Firmicutes_A	Clostridia	Lachnospirales	Lachnospiraceae	Bariatricus	Bariatricus comes
BAN_19	BAN	BAN_b24146	105	2599655	0	97.96	0	FALSE	none			0	0	0	0	Verrucomicrobiota	Verrucomicrobiae	Verrucomicrobiales	Akkermansiaceae	Akkermansia	Akkermansia muciniphila
BAN_20	BAN	BAN_b11395	103.4	4081204	2	96.9	0.51	FALSE	ok	l		1	1	0	0	Bacteroidota	Bacteroidia	Bacteroidales	Tannerellaceae	Parabacteroides	Parabacteroides merdae
BAN_21	BAN	BAN_b11422	102.4	838213	2	72.41	0	TRUE	ok			2	3	2	3	Firmicutes_C	Negativicutes	Veillonellales	Dialisteraceae	Dialister	Dialister invisus
BAN_22	BAN	BAN_b25840_1	101.8	2676304	3	56.78	0	FALSE	ok			5	4	0	0	Firmicutes_A	Clostridia	Lachnospirales	Lachnospiraceae	Roseburia	Roseburia inulinivorans
BAN_23	BAN	BAN_b25390_1	87.4	1794410	0	88.9	1.17	TRUE	none	a		0	0	0	0	Firmicutes_A	Clostridia	Oscillospirales	Oscillospiraceae	CAG-103	CAG-103 sp000432375
BAN_24	BAN	BAN_b34694	85.3	2077959	0	95.64	0.67	FALSE	none	a		0	0	0	0	Firmicutes_A	Clostridia	Oscillospirales	Acutalibacteraceae	UBA1417	UBA1417 sp003531055
BAN_25	BAN	BAN_b7257	77.9	1651846	2	79.78	6.21	FALSE	ok	a		3	1	1	1	Firmicutes_A	Clostridia	Oscillospirales	Oscillospiraceae	CAG-83	CAG-83 sp001916855
BAN_26	BAN	BAN_b41996_1	75.9	2560602	3	81.82	4.11	FALSE	ok			4	2	0	0	Firmicutes_A	Clostridia	Lachnospirales	Lachnospiraceae	Blautia_A	Blautia_A obeum
BAN_27	BAN	BAN_b19530_1	71.1	2667732	2	68.69	1.75	FALSE	ok	s		2	2	0	0	Firmicutes_A	Clostridia	Lachnospirales	Lachnospiraceae	Anaerobutyricum	Anaerobutyricum soehngenii
BAN_28	BAN	BAN_b36029_1	69	6253358	2	77.38	0	FALSE	ok	s		11	2	0	0	Bacteroidota	Bacteroidia	Bacteroidales	Bacteroidaceae	Bacteroides	Bacteroides cellulosilyticus
BAN_29	BAN	BAN_b53768	68.1	1730950	2	70.17	2.59	FALSE	ok	a		2	1	0	0	Firmicutes_A	Clostridia	Oscillospirales	Oscillospiraceae	CAG-83	CAG-83 sp000435555
BAN_30	BAN	BAN_b29408	66.2	2005298	2	70.17	8.62	FALSE	ok			2	1	0	0	Actinobacteriota	Actinomycetia	Actinomycetales	Bifidobacteriaceae	Bifidobacterium	Bifidobacterium adolescentis
BAN_31	BAN	BAN_b5674_1	62.4	1602213	2	78.38	1.01	FALSE	ok	a		65	45	55	42	Firmicutes_A	Clostridia	Oscillospirales	Oscillospiraceae	ER4	ER4 sp000765235
BAN_32	BAN	BAN_b5231_1	62.1	1806763	2	52.63	0	FALSE	ok			2	1	0	0	Firmicutes_A	Clostridia	Lachnospirales	Lachnospiraceae	Anaerostipes	Anaerostipes hadrus_A
BAN_33	BAN	BAN_b1304_1	60.2	2278633	0	99.98	1.5	FALSE	none	i		0	0	0	0	Firmicutes_C	Negativicutes	Acidaminococcales	Acidaminococcaceae	Phascolarctobacterium	Phascolarctobacterium faecium
BAN_34	BAN	BAN_b39301_1	58.4	2328730	3	91.26	1.02	FALSE	ok	s		5	3	0	0	Firmicutes_A	Clostridia	Lachnospirales	Lachnospiraceae	Dorea	Dorea formicigenerans
BAN_35	BAN	BAN_b11121_1	54.1	2209076	0	88.61	4.03	FALSE	none			0	0	0	0	Actinobacteriota	Actinomycetia	Actinomycetales	Bifidobacteriaceae	Bifidobacterium	Bifidobacterium longum
BAN_36	BAN	BAN_b12224	53.8	1886963	0	88.67	1.68	FALSE	none			0	0	0	0	Firmicutes_A	Clostridia	Oscillospirales	Butyricicoccaceae	Agathobaculum	Agathobaculum sp003481705
BAN_37	BAN	BAN_b20248_1	51.1	2735316	0	95.67	2.15	FALSE	none	s		0	0	0	0	Firmicutes_A	Clostridia	Lachnospirales	Lachnospiraceae	Butyribacter	Butyribacter sp003529475
BAN_38	BAN	BAN_b39213_1	50.9	2268938	0	89.64	4.32	FALSE	none	s		0	0	0	0	Firmicutes_A	Clostridia	Lachnospirales	Lachnospiraceae	Clostridium_Q	Clostridium_Q fessum
BAN_39	BAN	BAN_b8482_1	49.4	3303646	0	93.37	3.01	FALSE	none	s		0	0	0	0	Firmicutes_A	Clostridia	Lachnospirales	Lachnospiraceae	KLE1615	KLE1615 sp900066985
BAN_40	BAN	BAN_b31358_1	48	2588567	0	98.32	0	FALSE	none	a		0	0	0	0	Firmicutes_A	Clostridia	Oscillospirales	Ruminococcaceae	Ruminiclostridium_E	Ruminiclostridium_E siraeum
BAN_41	BAN	BAN_b7020_1	46.5	2319781	0	81.65	0.63	FALSE	none	a		0	0	0	0	Proteobacteria	Gammaproteobacteria	Burkholderiales	Burkholderiaceae	Parasutterella	Parasutterella excrementihominis
BAN_42	BAN	BAN_b13268_1	45.8	2200117	2	82	2.58	FALSE	ok	f		1	1	0	0	Actinobacteriota	Coriobacteriia	Coriobacteriales	Eggerthellaceae	Adlercreutzia	Adlercreutzia celatus_A
BAN_43	BAN	BAN_b26653	44.2	2005791	0	85.5	1.34	FALSE	none	a		0	0	0	0	Firmicutes_A	Clostridia	Oscillospirales	Ruminococcaceae	Ruminococcus_C	Ruminococcus_C sp000437175
BAN_44	BAN	BAN_b25172_1	43.9	2547438	2	57.18	0.88	FALSE	ok			7	1	0	0	Firmicutes_A	Clostridia	Lachnospirales	Lachnospiraceae	Anaerobutyricum	Anaerobutyricum hallii
BAN_45	BAN	BAN_b43545_1	43	2478976	0	82.85	2.63	FALSE	none	s		0	0	0	0	Firmicutes_A	Clostridia	Lachnospirales	Lachnospiraceae	UMGS1375	UMGS1375 sp900066615
BAN_46	BAN	BAN_b32947	42.4	2590890	0	98.46	0.75	FALSE	none	s		0	0	0	0	Bacteroidota	Bacteroidia	Bacteroidales	UBA11471	UBA11471	UBA11471 sp000434215
BAN_47	BAN	BAN_b10479_1	38.3	2033142	0	69.4	1.79	FALSE	none			0	0	0	0	Firmicutes_A	Clostridia	Oscillospirales	Ruminococcaceae	Gemmiger	Gemmiger qucibialis
BAN_48	BAN	BAN_b34919_1	37.8	1684237	0	74.87	6.9	FALSE	none			0	0	0	0	Firmicutes_A	Clostridia	Oscillospirales	Oscillospiraceae	CAG-83	CAG-83 sp000431575
BAN_49	BAN	BAN_b14200_1	36	2270282	0	90.15	2.18	FALSE	none			0	0	0	0	Firmicutes_A	Clostridia	Oscillospirales	Oscillospiraceae	Evtepia	Evtepia excrementipullorum
BAN_50	BAN	BAN_b21649_1	35.7	1945603	0	96.22	0	FALSE	none	s		0	0	0	0	Firmicutes_A	Clostridia	Lachnospirales	Anaerotignaceae	Anaerotignum	Anaerotignum faecicola
BAN_51	BAN	BAN_b275	35.3	4638952	0	98.54	0.33	FALSE	none	l		0	0	0	0	Proteobacteria	Gammaproteobacteria	Enterobacterales	Enterobacteriaceae	Escherichia	Escherichia coli
BAN_52	BAN	BAN_b34949_1	33.9	2655032	0	75.15	1.75	FALSE	none	s		0	0	0	0	Firmicutes_A	Clostridia	Lachnospirales	Lachnospiraceae	Copromonas	Copromonas sp900066785
BAN_53	BAN	BAN_b11282_1	33.4	1576642	0	67.88	3.71	FALSE	none			0	0	0	0	Firmicutes_A	Clostridia	Oscillospirales	Oscillospiraceae	Dysosmobacter	Dysosmobacter sp001916835
BAN_54	BAN	BAN_b29176	32.5	2823770	0	97.8	0.34	FALSE	none	a		0	0	0	0	Firmicutes_A	Clostridia	Oscillospirales	Acutalibacteraceae	Clostridium_A	Clostridium_A leptum
BAN_55	BAN	BAN_b21668_1	32.1	3189930	0	97.23	0	FALSE	none	s		0	0	0	0	Bacteroidota	Bacteroidia	Bacteroidales	Coprobacteraceae	Coprobacter	Coprobacter fastidiosus
BAN_56	BAN	BAN_b8155_1	31.1	2675015	0	82.25	7.89	FALSE	none	s		0	0	0	0	Firmicutes_A	Clostridia	Lachnospirales	Lachnospiraceae	Coprococcus_A	Coprococcus_A catus
BAN_57	BAN	BAN_b21189	29.5	2373515	0	66.87	0	FALSE	none	q		0	0	0	0	Firmicutes_A	Clostridia	Oscillospirales	Oscillospiraceae	Lawsonibacter	Lawsonibacter sp000177015
BAN_58	BAN	BAN_b11900	28.1	1596482	0	80.36	2.8	FALSE	none	s		0	0	0	0	Firmicutes_A	Clostridia	TANB77	CAG-508	Merdicola	Merdicola sp018371855
BAN_59	BAN	BAN_b7332_1	27.3	2092970	0	87.37	3.56	FALSE	none			0	0	0	0	Firmicutes_A	Clostridia	Lachnospirales	Lachnospiraceae	UBA11774	UBA11774 sp003507655
BAN_60	BAN	BAN_b16895_1	27.2	1958384	0	68.1	0	FALSE	none			0	0	0	0	Firmicutes_A	Clostridia	Oscillospirales	Butyricicoccaceae	Agathobaculum	Agathobaculum butyriciproducens
BAN_61	BAN	BAN_b36868_1	26.9	2449197	0	88.44	3.4	FALSE	none			0	0	0	0	Firmicutes_A	Clostridia	Lachnospirales	Lachnospiraceae	Eisenbergiella	Eisenbergiella sp900066775
BAN_62	BAN	BAN_b11201_1	25.1	2747471	0	73.13	3.51	FALSE	none			0	0	0	0	Firmicutes_A	Clostridia	Lachnospirales	Lachnospiraceae	Acetatifactor	Acetatifactor sp900066565
BAN_63	BAN	BAN_b4882_1	24.1	1556724	0	92.27	2.32	FALSE	none	s		0	0	0	0	Firmicutes	Bacilli	Lactobacillales	Streptococcaceae	Streptococcus	Streptococcus thermophilus
BAN_64	BAN	BAN_b3742_1	23.5	2334989	0	73.15	5.17	FALSE	none	s		0	0	0	0	Firmicutes_A	Clostridia	Lachnospirales	Lachnospiraceae	Schaedlerella	Schaedlerella sp900066545
BAN_65	BAN	BAN_b30359	23	2422763	0	97.26	0.71	FALSE	none	a		0	0	0	0	Firmicutes_A	Clostridia	Oscillospirales	Ruminococcaceae	Ruminococcus_D	Ruminococcus_D bicirculans
BAN_66	BAN	BAN_b29315_1	22.7	2647208	0	96.29	1.65	FALSE	none			0	0	0	0	Firmicutes_A	Clostridia	Christensenellales	CAG-74	Ventricola	Ventricola sp900542445
BAN_67	BAN	BAN_b29755_1	22.7	4382407	0	95.98	1.39	FALSE	none	s		0	0	0	0	Bacteroidota	Bacteroidia	Bacteroidales	Tannerellaceae	Parabacteroides	Parabacteroides distasonis
BAN_68	BAN	BAN_b35273_1	20.9	2574975	0	97.32	3.62	FALSE	none	a		0	0	0	0	Firmicutes_A	Clostridia	UBA1381	UBA1381	CAG-41	CAG-41 sp900066215
BAN_69	BAN	BAN_b4896_1	20.3	1688943	0	54.31	0	FALSE	none			0	0	0	0	Actinobacteriota	Actinomycetia	Actinomycetales	Bifidobacteriaceae	Bifidobacterium	Bifidobacterium pseudocatenulatum
BAN_70	BAN	BAN_b11901_1	19.9	2284730	2	98.99	0.06	FALSE	ok	a		3	1	0	0	Firmicutes_A	Clostridia	Oscillospirales	Ruminococcaceae	UBA1394	UBA1394 sp900538575
BAN_71	BAN	BAN_b20198_1	19.4	2234002	2	71.02	1.72	FALSE	ok	s		4	1	0	0	Firmicutes_A	Clostridia	Lachnospirales	Lachnospiraceae	Mediterraneibacter	Mediterraneibacter torques
BAN_72	BAN	BAN_b22042_1	18.8	3164851	0	95.94	1.6	FALSE	none	s		0	0	0	0	Bacteroidota	Bacteroidia	Bacteroidales	Barnesiellaceae	Barnesiella	Barnesiella intestinihominis
BAN_73	BAN	BAN_b28400_1	18.8	2005004	0	93.29	1.03	FALSE	none	a		0	0	0	0	Firmicutes_A	Clostridia	Oscillospirales	Acutalibacteraceae	UMGS1071	UMGS1071 sp900542375
BAN_74	BAN	BAN_b2504_1	17.6	1772547	0	60.42	0	FALSE	none			0	0	0	0	Firmicutes_A	Clostridia	Oscillospirales	Oscillospiraceae	Faecousia	Faecousia sp003525905
BAN_75	BAN	BAN_b26442_1	16.5	2073159	0	55.58	1.75	FALSE	none			0	0	0	0	Firmicutes_A	Clostridia	Lachnospirales	Lachnospiraceae	Ventrimonas	Ventrimonas sp003478505
BAN_76	BAN	BAN_b60312_1	16.4	2294172	0	69.62	3.51	FALSE	none			0	0	0	0	Firmicutes_A	Clostridia	Lachnospirales	Lachnospiraceae	Eubacterium_G	Eubacterium_G sp000435815
BAN_77	BAN	BAN_b33073_1	15.5	2555861	0	68.74	0	FALSE	none	p		0	0	0	0	Firmicutes_A	Clostridia	Lachnospirales	Lachnospiraceae	Copromonas	Copromonas sp000435795
BAN_78	BAN	BAN_b32656_1	15.3	2467002	0	59.65	0	FALSE	none	s		0	0	0	0	Firmicutes_A	Clostridia	Lachnospirales	Lachnospiraceae	Choladousia	Choladousia sp902363135
BAN_79	BAN	BAN_b11391	15.2	2413162	0	60.34	0	FALSE	none	t		0	0	0	0	Bacteroidota	Bacteroidia	Bacteroidales	Rikenellaceae	Alistipes	Alistipes onderdonkii
BAN_80	BAN	BAN_b3528_1	14.5	2799799	0	63.16	3.51	FALSE	none			0	0	0	0	Firmicutes_A	Clostridia	Lachnospirales	Lachnospiraceae	Limivivens	Limivivens sp900066135
BAN_81	BAN	BAN_b25613_1	14.2	2104585	0	94.72	1.36	FALSE	none	a		0	0	0	0	Firmicutes_A	Clostridia	Oscillospirales	Ruminococcaceae	Negativibacillus	Negativibacillus sp905197685
BAN_82	BAN	BAN_b5549_1	14.2	4037412	0	96.38	3.41	FALSE	none	s		0	0	0	0	Bacteroidota	Bacteroidia	Bacteroidales	Marinifilaceae	Odoribacter	Odoribacter splanchnicus
BAN_83	BAN	BAN_b27350	14	2647773	0	93.4	0	FALSE	none	s		0	0	0	0	Firmicutes	Bacilli	Erysipelotrichales	Coprobacillaceae	Faecalibacillus	Faecalibacillus intestinalis
BAN_84	BAN	BAN_b10609_1	13.1	3758467	0	94.97	2.17	FALSE	none	s		0	0	0	0	Desulfobacterota_I	Desulfovibrionia	Desulfovibrionales	Desulfovibrionaceae	Bilophila	Bilophila wadsworthia
BAN_85	BAN	BAN_b23538_1	12.7	1999633	0	72.67	1.12	FALSE	none			0	0	0	0	Firmicutes_A	Clostridia	Lachnospirales	Lachnospiraceae	Lachnospira	Lachnospira sp003451515
BAN_86	BAN	BAN_b28111_1	12.1	2408224	0	87.63	3.94	FALSE	none	l		0	0	0	0	Bacteroidota	Bacteroidia	Bacteroidales	Rikenellaceae	Alistipes_A	Alistipes_A indistinctus
BAN_87	BAN	BAN_b22208_1	11.6	1865995	0	51.02	6.9	FALSE	none			0	0	0	0	Firmicutes_A	Clostridia	Oscillospirales	Oscillospiraceae	CAG-170	CAG-170 sp000432135
BAN_88	BAN	BAN_b36126_1	10.4	1859854	0	87.79	3.03	FALSE	none	s		0	0	0	0	Firmicutes_A	Clostridia	Peptostreptococcales	Peptostreptococcaceae	Romboutsia	Romboutsia timonensis
BAN_89	BAN	BAN_b441_1	9.5	1584732	0	60.5	1.72	FALSE	none	r		0	0	0	0	Firmicutes_A	Clostridia	Peptostreptococcales	Anaerovoracaceae	Copromorpha	Copromorpha sp900549125
BAN_90	BAN	BAN_b24406_1	8.5	1390038	0	60.98	0.73	FALSE	none	s		0	0	0	0	Firmicutes_A	Clostridia	Peptostreptococcales	Peptostreptococcaceae	Intestinibacter	Intestinibacter bartlettii
BAP_1	BAP	BAP_b19829_1	1161.5	3388202	0	91.18	0.19	TRUE	too_many	f		0	0	0	0	Bacteroidota	Bacteroidia	Bacteroidales	Bacteroidaceae	Phocaeicola	Phocaeicola vulgatus
BAP_2	BAP	BAP_b1929_1	636	2020101	0	80.78	1.42	TRUE	too_many	s		0	0	0	0	Firmicutes_A	Clostridia	Lachnospirales	Lachnospiraceae	Fusicatenibacter	Fusicatenibacter saccharivorans
BAP_3	BAP	BAP_b19684_1	634.3	2260859	6	89.58	0.06	TRUE	ok			78	45	0	0	Firmicutes_A	Clostridia	Oscillospirales	Ruminococcaceae	Gemmiger	Gemmiger formicilis
BAP_4	BAP	BAP_b81_1	602.1	3459583	0	68.36	0.32	TRUE	too_many	s		0	0	0	0	Bacteroidota	Bacteroidia	Bacteroidales	Bacteroidaceae	Bacteroides	Bacteroides ovatus
BAP_5	BAP	BAP_b3033_1	490.3	3152044	3	92.17	2.29	TRUE	ok	s		209	38	194	35	Firmicutes_A	Clostridia	Lachnospirales	Lachnospiraceae	Roseburia	Roseburia intestinalis
BAP_6	BAP	BAP_b13585	452.9	3920678	3	79.66	0.86	TRUE	ok	s	s->l	2	2	1	1	Bacteroidota	Bacteroidia	Bacteroidales	Bacteroidaceae	Bacteroides	Bacteroides uniformis
BAP_7	BAP	BAP_b16580_1	451.7	2040307	0	51.71	0	TRUE	too_many	s		0	0	0	0	Firmicutes_A	Clostridia	Lachnospirales	Lachnospiraceae	Blautia_A	Blautia_A sp000436615
BAP_8	BAP	BAP_b35341_1	444.8	2839798	4	75.64	3.51	TRUE	ok	s		56	10	3	3	Firmicutes_A	Clostridia	Lachnospirales	Lachnospiraceae	Blautia_A	Blautia_A sp900066335
BAP_9	BAP	BAP_b11078	315	2063757	3	99.19	0.81	TRUE	ok	f		101	43	0	0	Actinobacteriota	Coriobacteriia	Coriobacteriales	Coriobacteriaceae	Collinsella	Collinsella sp900545745
BAP_10	BAP	BAP_b22613	230.6	2700834	2	95.82	0.73	TRUE	ok	l		1	1	0	0	Firmicutes_A	Clostridia	Lachnospirales	Lachnospiraceae	Lachnospira	Lachnospira sp000437735
BAP_11	BAP	BAP_b1869	228.3	3275697	2	91.13	0.5	TRUE	ok	s		13	5	1	1	Bacteroidota	Bacteroidia	Bacteroidales	Bacteroidaceae	Phocaeicola	Phocaeicola massiliensis
BAP_12	BAP	BAP_b29017	221.3	1840516	2	60	3.57	FALSE	ok			1	1	1	1	Firmicutes_A	Clostridia	Oscillospirales	Ruminococcaceae	Faecalibacterium	Faecalibacterium prausnitzii_G
BAP_13	BAP	BAP_b10227	215.8	2420165	3	96.45	0.34	TRUE	ok	s		3	3	1	1	Firmicutes_A	Clostridia	Lachnospirales	Lachnospiraceae	Eubacterium_G	Eubacterium_G sp000435815
BAP_14	BAP	BAP_b22098_1	186.5	2296074	0	62.06	0	TRUE	too_many			0	0	0	0	Firmicutes_A	Clostridia	Lachnospirales	Lachnospiraceae	Blautia_A	Blautia_A wexlerae
BAP_15	BAP	BAP_b21211	181.7	4187223	2	98.4	0.1	TRUE	ok	s	s->l	3	4	0	0	Bacteroidota	Bacteroidia	Bacteroidales	Tannerellaceae	Parabacteroides	Parabacteroides johnsonii
BAP_16	BAP	BAP_b8797_1	156.9	3669765	3	89.31	4.34	TRUE	ok	s		16	9	0	0	Firmicutes_A	Clostridia	Lachnospirales	Lachnospiraceae	Blautia_A	Blautia_A faecis
BAP_17	BAP	BAP_b9825_1	156.5	2913671	0	93.24	1.93	FALSE	too_many			0	0	0	0	Firmicutes_A	Clostridia	Lachnospirales	Lachnospiraceae	Acetatifactor	Acetatifactor intestinalis
BAP_18	BAP	BAP_b20610_1	152.3	2894432	2	96.84	0.34	TRUE	ok	s		1	1	0	0	Firmicutes_A	Clostridia	Lachnospirales	Lachnospiraceae	Butyribacter	Butyribacter sp000436755
BAP_19	BAP	BAP_b5654	151.8	2660446	2	97.99	1.01	FALSE	ok	a		11	3	0	0	Firmicutes_A	Clostridia	UBA1381	UBA1381	CAG-41	CAG-41 sp900066215
BAP_20	BAP	BAP_b5920_1	149.8	1361911	0	87.75	2.88	TRUE	too_many	s		0	0	0	0	Firmicutes	Bacilli	Lactobacillales	Streptococcaceae	Streptococcus	Streptococcus thermophilus
BAP_21	BAP	BAP_b9919	145.7	1842074	0	97.85	0.1	FALSE	none	s		0	0	0	0	Proteobacteria	Alphaproteobacteria	RF32	CAG-239	51-20	51-20 sp001917175
BAP_22	BAP	BAP_b2760_1	143.7	1978671	2	70.72	1.72	TRUE	ok	s		6	1	0	0	Firmicutes_A	Clostridia	Lachnospirales	Lachnospiraceae	Mediterraneibacter	Mediterraneibacter lactaris
BAP_23	BAP	BAP_b35598_1	131.6	2607712	2	94.16	1.27	TRUE	ok	s		2	2	2	2	Firmicutes_A	Clostridia	Lachnospirales	Lachnospiraceae	UMGS1375	UMGS1375 sp900066615
BAP_24	BAP	BAP_b30826_1	128.4	2785118	3	95.21	1.01	TRUE	ok	s		47	35	0	0	Firmicutes_A	Clostridia	Lachnospirales	Lachnospiraceae	Anaerobutyricum	Anaerobutyricum hallii
BAP_25	BAP	BAP_b5186	127.1	2297426	2	99.06	0	TRUE	ok	f		0	0	0	0	Firmicutes	Bacilli	Erysipelotrichales	Coprobacillaceae	Faecalibacillus	Faecalibacillus faecis
BAP_26	BAP	BAP_b29808_1	118.7	3268844	2	89.58	1.32	FALSE	ok			20	10	0	0	Firmicutes_A	Clostridia	Lachnospirales	Lachnospiraceae	Enterocloster	Enterocloster sp000431375
BAP_27	BAP	BAP_b3309_1	113.9	2526027	3	91.83	1.17	FALSE	ok	s		11	2	0	0	Firmicutes_A	Clostridia	Lachnospirales	Lachnospiraceae	Dorea_A	Dorea_A sp900550865
BAP_28	BAP	BAP_b10914_1	112.9	2566442	2	76.27	0	FALSE	ok	s		3	2	1	1	Firmicutes_A	Clostridia	Lachnospirales	Lachnospiraceae	Ruminococcus_B	Ruminococcus_B gnavus
BAP_29	BAP	BAP_b12728_1	91.4	3277442	3	92.56	0.69	FALSE	ok	s		15	9	2	2	Firmicutes_A	Clostridia	Lachnospirales	Lachnospiraceae	Limivivens	Limivivens sp900543575
BAP_30	BAP	BAP_b39294	90.3	2989682	2	88.51	2.95	FALSE	ok			245	157	157	108	Firmicutes_A	Clostridia	Oscillospirales	Oscillospiraceae	Flavonifractor	Flavonifractor plautii
BAP_31	BAP	BAP_b19794	81.3	1826237	2	83.22	0	FALSE	ok			14	3	0	0	Firmicutes_A	Clostridia	Oscillospirales	Acutalibacteraceae	UBA1417	UBA1417 sp003531055
BAP_32	BAP	BAP_b32955_1	80.4	2808923	2	75.76	1.75	FALSE	ok	s		19	11	0	0	Firmicutes_A	Clostridia	Lachnospirales	Lachnospiraceae	Roseburia	Roseburia inulinivorans
BAP_33	BAP	BAP_b9414	79.7	2535680	2	95.03	0.22	FALSE	ok	s		16	3	0	0	Firmicutes_A	Clostridia	Lachnospirales	Lachnospiraceae	Lachnospira	Lachnospira rogosae_A
BAP_34	BAP	BAP_b4873	75.3	2171992	0	68.72	2.68	FALSE	none	a		0	0	0	0	Firmicutes_A	Clostridia	Oscillospirales	Ruminococcaceae	Gemmiger	Gemmiger qucibialis
BAP_35	BAP	BAP_b17275_1	74.8	2744545	2	95.35	0.67	FALSE	ok	s		1	1	0	0	Firmicutes_A	Clostridia	Lachnospirales	Lachnospiraceae	Butyribacter	Butyribacter sp003529475
BAP_36	BAP	BAP_b30884	70.5	2914048	0	77.86	0	FALSE	none	s		0	0	0	0	Firmicutes_A	Clostridia	Lachnospirales	Lachnospiraceae	Roseburia	Roseburia hominis
BAP_37	BAP	BAP_b2132_1	70.3	2070842	3	50.88	1.75	FALSE	ok			6	3	0	0	Firmicutes_A	Clostridia	Lachnospirales	Lachnospiraceae	Anaerostipes	Anaerostipes hadrus_A
BAP_38	BAP	BAP_b24581_1	67	2105294	3	51.75	0	FALSE	ok			63	31	33	20	Firmicutes_A	Clostridia	Lachnospirales	Lachnospiraceae	Anaerostipes	Anaerostipes hadrus
BAP_39	BAP	BAP_b17311_1	63.7	2737594	0	97.7	1.81	FALSE	none	q		0	0	0	0	Firmicutes_A	Clostridia	Oscillospirales	Oscillospiraceae	Faecousia	Faecousia sp000435995
BAP_40	BAP	BAP_b2301_1	60.3	2315768	0	96.42	1.05	FALSE	none	a		0	0	0	0	Firmicutes_A	Clostridia	Oscillospirales	Butyricicoccaceae	Agathobaculum	Agathobaculum butyriciproducens
BAP_41	BAP	BAP_b28334	57.1	2173166	0	89.93	0	FALSE	none	a		0	0	0	0	Firmicutes_A	Clostridia	Oscillospirales	Ruminococcaceae	Ruminococcus_C	Ruminococcus_C callidus
BAP_42	BAP	BAP_b20852	55.7	1860282	2	96.91	0	FALSE	ok	a		1	1	0	0	Firmicutes_A	Clostridia	Oscillospirales	Acutalibacteraceae	CAG-217	CAG-217 sp000436335
BAP_43	BAP	BAP_b10222_1	54.9	3232747	0	94.59	3.01	FALSE	none	s		0	0	0	0	Firmicutes_A	Clostridia	Lachnospirales	Lachnospiraceae	KLE1615	KLE1615 sp900066985
BAP_44	BAP	BAP_b20049_1	54.5	2370351	2	92.01	1.93	FALSE	ok	s		6	4	0	0	Firmicutes_A	Clostridia	Lachnospirales	Lachnospiraceae	Agathobacter	Agathobacter rectalis
BAP_45	BAP	BAP_b4555_1	54.3	2096254	2	70.65	1.75	FALSE	ok	s		1	1	0	0	Firmicutes_A	Clostridia	Lachnospirales	Lachnospiraceae	Dorea	Dorea formicigenerans
BAP_46	BAP	BAP_b7178_1	51.6	2406697	0	87.16	5.54	FALSE	none			0	0	0	0	Firmicutes_A	Clostridia	Oscillospirales	Oscillospiraceae	Lawsonibacter	Lawsonibacter asaccharolyticus
BAP_47	BAP	BAP_b38590_1	51	2172726	2	71.9	1.72	FALSE	ok	s		1	0	0	0	Firmicutes_A	Clostridia	Lachnospirales	Lachnospiraceae	Mediterraneibacter	Mediterraneibacter faecis
BAP_48	BAP	BAP_b28657	45.7	2189685	0	98.6	0.96	FALSE	none	s		0	0	0	0	Bacteroidota	Bacteroidia	Bacteroidales	Rikenellaceae	Alistipes	Alistipes putredinis
BAP_49	BAP	BAP_b7032	43.5	2781833	0	88.27	5.37	FALSE	none	a		0	0	0	0	Firmicutes_A	Clostridia	Oscillospirales	Oscillospiraceae	Dysosmobacter	Dysosmobacter welbionis
BAP_50	BAP	BAP_b17930	43.4	2788615	2	61.75	0.88	FALSE	ok	s		2	1	0	0	Firmicutes_A	Clostridia	Lachnospirales	Lachnospiraceae	Blautia_A	Blautia_A caecimuris
BAP_51	BAP	BAP_b5402	43.1	2613980	0	94.51	5.37	FALSE	none	s		0	0	0	0	Firmicutes_A	Clostridia	Lachnospirales	Lachnospiraceae	Coprococcus_A	Coprococcus_A catus
BAP_52	BAP	BAP_b25234_1	41.7	2567917	0	90.09	2.59	FALSE	none	s		0	0	0	0	Firmicutes_A	Clostridia	Lachnospirales	Lachnospiraceae	Eisenbergiella	Eisenbergiella sp900066775
BAP_53	BAP	BAP_b30238	37.6	1863221	0	93.35	0.78	FALSE	none	a		0	0	0	0	Firmicutes_A	Clostridia	Oscillospirales	Oscillospiraceae	ER4	ER4 sp000765235
BAP_54	BAP	BAP_b14951	34	2846599	0	95.4	0	FALSE	none			0	0	0	0	Verrucomicrobiota	Verrucomicrobiae	Verrucomicrobiales	Akkermansiaceae	Akkermansia	Akkermansia muciniphila_B
BAP_55	BAP	BAP_b32977	33.6	1979730	0	90.42	1.61	FALSE	none	a		0	0	0	0	Firmicutes_A	Clostridia	Oscillospirales	Oscillospiraceae	CAG-103	CAG-103 sp900317855
BAP_56	BAP	BAP_b2546	31.3	3464470	0	69.65	1.75	FALSE	none	s		0	0	0	0	Firmicutes_A	Clostridia	Lachnospirales	Lachnospiraceae	Pelethocola	Pelethocola sp900539175
BAP_57	BAP	BAP_b16615_1	29	4744495	0	73.86	5.26	FALSE	none	s		0	0	0	0	Firmicutes_A	Clostridia	Lachnospirales	Lachnospiraceae	Enterocloster	Enterocloster sp900555045
BAP_58	BAP	BAP_b189	27.9	2700089	2	86.59	3.98	FALSE	ok			3	0	0	0	Firmicutes_A	Clostridia	Lachnospirales	Lachnospiraceae	Eubacterium_I	Eubacterium_I sp.
BAP_59	BAP	BAP_b12844	27.5	1697188	0	96.88	0.09	FALSE	none	t		0	0	0	0	Actinobacteriota	Coriobacteriia	Coriobacteriales	Eggerthellaceae	CAG-1427	CAG-1427 sp000435675
BAP_60	BAP	BAP_b39836	27.5	3002093	0	93.55	3.83	FALSE	none	s		0	0	0	0	Actinobacteriota	Coriobacteriia	Coriobacteriales	Eggerthellaceae	CAJFUR01	CAJFUR01 sp904420575
BAP_61	BAP	BAP_b5423	24.8	1109769	0	57.47	0.65	FALSE	none			0	0	0	0	Firmicutes_C	Negativicutes	Acidaminococcales	Acidaminococcaceae	Phascolarctobacterium	Phascolarctobacterium faecium
BAP_62	BAP	BAP_b22632	23.8	2213119	0	70.85	1.75	FALSE	none			0	0	0	0	Firmicutes_A	Clostridia	Lachnospirales	Lachnospiraceae	RUG115	RUG115 sp900066395
BAP_63	BAP	BAP_b5166	23.2	2751626	0	100	0.62	FALSE	none	s		0	0	0	0	Proteobacteria	Gammaproteobacteria	Burkholderiales	Burkholderiaceae	Sutterella	Sutterella wadsworthensis
BAP_64	BAP	BAP_b6377	22.9	2842237	0	96.18	1.81	FALSE	none	a		0	0	0	0	Firmicutes_A	Clostridia	Oscillospirales	Acutalibacteraceae	Clostridium_A	Clostridium_A leptum
BAP_65	BAP	BAP_b36877_1	22.7	2292157	0	70.45	0	FALSE	none			0	0	0	0	Firmicutes_A	Clostridia	Lachnospirales	Lachnospiraceae	Mediterraneibacter	Mediterraneibacter torques
BAP_66	BAP	BAP_b10061	22.4	2536221	0	97.13	2.64	FALSE	none	l		0	0	0	0	Bacteroidota	Bacteroidia	Bacteroidales	Rikenellaceae	Alistipes	Alistipes communis
BAP_67	BAP	BAP_b1790_1	21.7	2091248	0	71.4	3.51	FALSE	none			0	0	0	0	Firmicutes_A	Clostridia	Lachnospirales	Lachnospiraceae	AM51-8	AM51-8 sp003478275
BAP_68	BAP	BAP_b13513_1	20.8	2382176	0	62.95	7.02	FALSE	none	s		0	0	0	0	Firmicutes_A	Clostridia	Lachnospirales	Lachnospiraceae	Choladousia	Choladousia sp902363135
BAP_69	BAP	BAP_b4557_1	20.3	2431960	0	67.44	0	FALSE	none			0	0	0	0	Firmicutes_A	Clostridia	Lachnospirales	Lachnospiraceae	Ventrimonas	Ventrimonas sp003480315
BAP_70	BAP	BAP_b8996_1	19.9	2187589	0	89.89	3.52	FALSE	none	s		0	0	0	0	Firmicutes_A	Clostridia	Peptostreptococcales	Peptostreptococcaceae	Romboutsia	Romboutsia timonensis
BAP_71	BAP	BAP_b6876	19.3	5574838	0	67.18	1.75	FALSE	none			0	0	0	0	Firmicutes_A	Clostridia	Lachnospirales	Lachnospiraceae	Enterocloster	Enterocloster sp000155435
BAP_72	BAP	BAP_b4629	18.7	2106263	0	88.15	2.01	FALSE	none	a		0	0	0	0	Firmicutes_A	Clostridia	Oscillospirales	Acutalibacteraceae	Acutalibacter	Acutalibacter sp900548545
BAP_73	BAP	BAP_b23702	17.6	1801195	0	93.5	1.79	FALSE	none	s		0	0	0	0	Actinobacteriota	Actinomycetia	Actinomycetales	Bifidobacteriaceae	Bifidobacterium	Bifidobacterium animalis
BAP_74	BAP	BAP_b15020	16.8	2100847	0	57.34	0	FALSE	none			0	0	0	0	Firmicutes_A	Clostridia	Lachnospirales	Lachnospiraceae	JAGTTR01	JAGTTR01 sp018223385
BAP_75	BAP	BAP_b22447_1	16.6	4260069	0	63.64	1.75	FALSE	none			0	0	0	0	Firmicutes_A	Clostridia	Lachnospirales	Lachnospiraceae	Clostridium_Q	Clostridium_Q symbiosum
BAP_76	BAP	BAP_b29587_1	16.6	2568183	0	87.81	1.76	FALSE	none	s		0	0	0	0	Firmicutes_A	Clostridia	Peptostreptococcales	Peptostreptococcaceae	Intestinibacter	Intestinibacter bartlettii
BAP_77	BAP	BAP_b1752_1	16.1	2296073	0	87.52	2.2	FALSE	none	a		0	0	0	0	Firmicutes_A	Clostridia	Monoglobales	Monoglobaceae	Monoglobus	Monoglobus pectinilyticus
BAP_78	BAP	BAP_b20830	15.7	2357498	0	78.92	1.08	FALSE	none	s		0	0	0	0	Actinobacteriota	Coriobacteriia	Coriobacteriales	Eggerthellaceae	Adlercreutzia	Adlercreutzia celatus_A
BAP_79	BAP	BAP_b21048	15.1	2506340	0	60.67	3.45	FALSE	none	a		0	0	0	0	Firmicutes_A	Clostridia	Oscillospirales	Oscillospiraceae	HGM13006	HGM13006 sp.
BAP_80	BAP	BAP_b25312_1	14.9	1626571	0	71.53	2.62	FALSE	none	s		0	0	0	0	Firmicutes	Bacilli	Haloplasmatales_A	Turicibacteraceae	Turicibacter	Turicibacter sp001543345
BAP_81	BAP	BAP_b928_1	14.6	1973236	0	56.14	1.75	FALSE	none			0	0	0	0	Firmicutes_A	Clostridia	Lachnospirales	Lachnospiraceae	Choladocola	Choladocola sp018223365
BAP_82	BAP	BAP_b1229_1	14.4	2180381	0	53.51	0	FALSE	none			0	0	0	0	Firmicutes_A	Clostridia	Lachnospirales	Lachnospiraceae	Lachnoclostridium_B	Lachnoclostridium_B sp900066765
BAP_83	BAP	BAP_b22275	13.9	1779120	0	83.59	1.95	FALSE	none	f		0	0	0	0	Firmicutes_A	Clostridia	Peptostreptococcales	Anaerovoracaceae	Fimisoma	Fimisoma sp000435715
BAP_84	BAP	BAP_b33274_1	13.7	1969693	0	52.63	5.26	FALSE	none			0	0	0	0	Firmicutes_A	Clostridia	Lachnospirales	Lachnospiraceae	Eubacterium_G	Eubacterium_G sp000432355
BAP_85	BAP	BAP_b18157	12.9	2174719	0	57.38	0	FALSE	none	t		0	0	0	0	Bacteroidota	Bacteroidia	Bacteroidales	Rikenellaceae	Alistipes	Alistipes shahii
BAP_86	BAP	BAP_b30932	11.8	1217873	0	64.22	0.23	FALSE	none	s		0	0	0	0	Actinobacteriota	Actinomycetia	Actinomycetales	Bifidobacteriaceae	Bifidobacterium	Bifidobacterium longum
BAP_87	BAP	BAP_b19884	11.6	2350655	0	66.79	1.07	FALSE	none			0	0	0	0	Bacteroidota	Bacteroidia	Bacteroidales	Coprobacteraceae	Coprobacter	Coprobacter fastidiosus
BAP_88	BAP	BAP_b4316	10.5	2638436	0	54.31	0	FALSE	none			0	0	0	0	Bacteroidota	Bacteroidia	Bacteroidales	Marinifilaceae	Odoribacter	Odoribacter splanchnicus
DAE_1	DAE	DAE_b32044_1	813.1	1516756	0	82.08	1.19	TRUE	too_many	s		0	0	0	0	Firmicutes_A	Clostridia	Lachnospirales	Lachnospiraceae	Agathobacter	Agathobacter rectalis
DAE_2	DAE	DAE_b8325_1	557.9	5758424	0	82.24	0	FALSE	too_many	s		0	0	0	0	Bacteroidota	Bacteroidia	Bacteroidales	Bacteroidaceae	Bacteroides	Bacteroides ovatus
DAE_3	DAE	DAE_b764_1	346.4	3006604	4	91.23	1.6	FALSE	ok	s		113	57	0	0	Firmicutes_A	Clostridia	Lachnospirales	Lachnospiraceae	Blautia_A	Blautia_A sp900066335
DAE_4	DAE	DAE_b6112_1	260.4	3547860	2	95.95	0.93	TRUE	ok	g		4	4	0	0	Bacteroidota	Bacteroidia	Bacteroidales	Bacteroidaceae	Phocaeicola	Phocaeicola plebeius_A
DAE_5	DAE	DAE_b23766_1	215.8	2524567	0	82.9	3.45	FALSE	too_many			0	0	0	0	Firmicutes_A	Clostridia	Lachnospirales	Lachnospiraceae	Agathobacter	Agathobacter faecis
DAE_6	DAE	DAE_b14129_1	173.1	2780302	0	94.64	5.98	FALSE	none	s		0	0	0	0	Firmicutes_A	Clostridia	Lachnospirales	Lachnospiraceae	Fusicatenibacter	Fusicatenibacter saccharivorans
DAE_7	DAE	DAE_b17334_1	167.5	1859731	0	82.85	0.84	TRUE	too_many	s		0	0	0	0	Firmicutes_A	Clostridia	Lachnospirales	Lachnospiraceae	Lachnospira	Lachnospira sp003451515
DAE_8	DAE	DAE_b11907_1	132.3	3748185	3	83.1	0.86	TRUE	ok			2	2	0	0	Bacteroidota	Bacteroidia	Bacteroidales	Bacteroidaceae	Bacteroides	Bacteroides uniformis
DAE_9	DAE	DAE_b1382	123.8	2117417	2	98.66	0.34	FALSE	ok	a		6	4	5	4	Firmicutes_A	Clostridia	Oscillospirales	Acutalibacteraceae	Ruminococcus_E	Ruminococcus_E sp003526955
DAE_10	DAE	DAE_b206_1	119.9	2416140	0	94.59	3.74	FALSE	none	a		0	0	0	0	Firmicutes_A	Clostridia	Oscillospirales	Ruminococcaceae	Gemmiger	Gemmiger qucibialis
DAE_11	DAE	DAE_b21794_1	115.2	4420688	3	96.45	0.31	TRUE	ok	s		2	3	0	0	Bacteroidota	Bacteroidia	Bacteroidales	Bacteroidaceae	Phocaeicola	Phocaeicola vulgatus
DAE_12	DAE	DAE_b6160_1	107	2438710	2	89.21	4.48	FALSE	ok	a		2	2	0	0	Firmicutes_A	Clostridia	Oscillospirales	Ruminococcaceae	Gemmiger	Gemmiger formicilis
DAE_13	DAE	DAE_b551_1	101.7	2098056	2	84.71	5.37	FALSE	ok	s		20	14	0	0	Firmicutes_A	Clostridia	Lachnospirales	Lachnospiraceae	Anaerostipes	Anaerostipes hadrus_A
DAE_14	DAE	DAE_b7620_1	98.8	3120180	0	92.83	3.95	FALSE	too_many			0	0	0	0	Firmicutes_A	Clostridia	Lachnospirales	Lachnospiraceae	Acetatifactor	Acetatifactor sp900066565
DAE_15	DAE	DAE_b27187	88	2816388	0	91.82	1.65	FALSE	none	s		0	0	0	0	Firmicutes_A	Clostridia	Lachnospirales	Lachnospiraceae	Roseburia	Roseburia hominis
DAE_16	DAE	DAE_b22675_1	86.9	2493170	0	94.12	1.9	FALSE	none	s		0	0	0	0	Firmicutes_A	Clostridia	Lachnospirales	Lachnospiraceae	UMGS1375	UMGS1375 sp900066615
DAE_17	DAE	DAE_b35215	81.6	3282735	2	96.26	1.01	FALSE	ok	s		20	0	0	0	Firmicutes_A	Clostridia	Lachnospirales	Lachnospiraceae	Butyribacter	Butyribacter intestini
DAE_18	DAE	DAE_b23822	76.5	2183783	0	100	1.61	FALSE	none	f		0	0	0	0	Actinobacteriota	Coriobacteriia	Coriobacteriales	Coriobacteriaceae	Collinsella	Collinsella sp.
DAE_19	DAE	DAE_b10654_1	74.2	2751445	2	98.01	0	FALSE	ok	a		2	1	0	0	Firmicutes_A	Clostridia	Oscillospirales	Ruminococcaceae	Ruminococcus_D	Ruminococcus_D bicirculans
DAE_20	DAE	DAE_b4162_1	73.5	2604214	0	90.27	8.29	FALSE	none	s		0	0	0	0	Firmicutes_A	Clostridia	Lachnospirales	Lachnospiraceae	Dorea_A	Dorea_A longicatena
DAE_21	DAE	DAE_b8693_1	67.8	2300841	2	52.63	1.75	FALSE	ok			3	2	0	0	Firmicutes_A	Clostridia	Lachnospirales	Lachnospiraceae	Blautia_A	Blautia_A sp003477525
DAE_22	DAE	DAE_b6221	59.9	3235885	0	72.56	0	FALSE	none	s		0	0	0	0	Firmicutes_A	Clostridia	Lachnospirales	Lachnospiraceae	Roseburia	Roseburia intestinalis
DAE_23	DAE	DAE_b12512	56.2	2030587	0	90.9	2.34	FALSE	none			0	0	0	0	Actinobacteriota	Actinomycetia	Actinomycetales	Bifidobacteriaceae	Bifidobacterium	Bifidobacterium longum
DAE_24	DAE	DAE_b19745	55.3	2156060	0	96.99	4.18	FALSE	none	s		0	0	0	0	Actinobacteriota	Actinomycetia	Actinomycetales	Bifidobacteriaceae	Bifidobacterium	Bifidobacterium pseudocatenulatum
DAE_25	DAE	DAE_b14735_1	52.8	3947464	3	86.26	5.1	FALSE	ok	s		5	4	0	0	Firmicutes_A	Clostridia	Lachnospirales	Lachnospiraceae	Anaerobutyricum	Anaerobutyricum hallii
DAE_26	DAE	DAE_b20488_1	48.4	3239513	0	94.05	2.69	FALSE	none	s		0	0	0	0	Firmicutes_A	Clostridia	Lachnospirales	Lachnospiraceae	KLE1615	KLE1615 sp900066985
DAE_27	DAE	DAE_b34256_1	47.4	2710335	3	92.11	0	FALSE	ok	s		16	5	0	0	Firmicutes_A	Clostridia	Lachnospirales	Lachnospiraceae	Lachnospira	Lachnospira sp000436475
DAE_28	DAE	DAE_b3338_2	46.3	2218566	0	90.77	6.9	FALSE	none	s		0	0	0	0	Firmicutes_A	Clostridia	Lachnospirales	Lachnospiraceae	Bariatricus	Bariatricus comes
DAE_29	DAE	DAE_b23257	45.9	2585787	0	89.76	0.19	FALSE	none			0	0	0	0	Firmicutes_A	Clostridia	Lachnospirales	Lachnospiraceae	Eisenbergiella	Eisenbergiella sp900066775
DAE_30	DAE	DAE_b10767_1	45.5	1945994	0	91.58	0.86	FALSE	none	a		0	0	0	0	Firmicutes_A	Clostridia	Oscillospirales	Oscillospiraceae	CAG-103	CAG-103 sp900757655
DAE_31	DAE	DAE_b31872_1	40.7	2770467	0	86.72	2.44	FALSE	none	s		0	0	0	0	Firmicutes_A	Clostridia	Lachnospirales	Lachnospiraceae	Ruminococcus_B	Ruminococcus_B gnavus
DAE_32	DAE	DAE_b33480_1	40.6	3078059	0	74.56	1.75	FALSE	none			0	0	0	0	Firmicutes_A	Clostridia	Lachnospirales	Lachnospiraceae	Roseburia	Roseburia inulinivorans
DAE_33	DAE	DAE_b5847	39.9	2319305	0	96.25	0	FALSE	none	i		0	0	0	0	Proteobacteria	Gammaproteobacteria	Burkholderiales	Burkholderiaceae	Mesosutterella	Mesosutterella massiliensis
DAE_34	DAE	DAE_b24525	38.5	2169772	0	94.08	0.67	FALSE	none	a		0	0	0	0	Firmicutes_A	Clostridia	Oscillospirales	Ruminococcaceae	Ruminococcus_C	Ruminococcus_C callidus
DAE_35	DAE	DAE_b23219	38	3105556	0	99.15	0	FALSE	none	a		0	0	0	0	Bacteroidota	Bacteroidia	Bacteroidales	Rikenellaceae	Alistipes	Alistipes finegoldii
DAE_36	DAE	DAE_b15602	37.2	2452438	0	84.48	7.54	FALSE	none	s		0	0	0	0	Firmicutes_A	Clostridia	Lachnospirales	Lachnospiraceae	Dorea	Dorea formicigenerans
DAE_37	DAE	DAE_b16688_1	36.5	3264837	0	84.24	4.2	FALSE	none			0	0	0	0	Firmicutes_A	Clostridia	Oscillospirales	Oscillospiraceae	Flavonifractor	Flavonifractor plautii
DAE_38	DAE	DAE_b2093	33.4	2177199	0	93.41	1.34	FALSE	none	a		0	0	0	0	Firmicutes_A	Clostridia	Oscillospirales	Butyricicoccaceae	Agathobaculum	Agathobaculum butyriciproducens
DAE_39	DAE	DAE_b23928	32.7	2745323	0	93.7	0.34	FALSE	none	s		0	0	0	0	Firmicutes_A	Clostridia	Lachnospirales	Lachnospiraceae	Butyribacter	Butyribacter sp003524945
DAE_40	DAE	DAE_b27905	32.4	1939922	0	97.32	0.75	FALSE	none	a		0	0	0	0	Firmicutes_A	Clostridia	Oscillospirales	Acutalibacteraceae	Eubacterium_R	Eubacterium_R sp000434995
DAE_41	DAE	DAE_b29661	32.2	2789117	0	71.21	0	FALSE	none	s		0	0	0	0	Firmicutes_A	Clostridia	Lachnospirales	Lachnospiraceae	Agathobacter	Agathobacter sp000434275
DAE_42	DAE	DAE_b9030	32.2	2611620	0	89.13	2.52	FALSE	none			0	0	0	0	Firmicutes_A	Clostridia	Lachnospirales	Lachnospiraceae	Eubacterium_I	Eubacterium_I sp900546495
DAE_43	DAE	DAE_b31442_1	31.9	3275291	0	73.3	6.14	FALSE	none			0	0	0	0	Firmicutes_A	Clostridia	Lachnospirales	Lachnospiraceae	Enterocloster	Enterocloster sp000431375
DAE_44	DAE	DAE_b14571	30.5	2688465	0	97.74	0.44	FALSE	none	s		0	0	0	0	Firmicutes_A	Clostridia	Lachnospirales	Lachnospiraceae	Eubacterium_F	Eubacterium_F sp003491505
DAE_45	DAE	DAE_b16816_1	30	2801996	2	85.44	4.83	FALSE	ok	s		3	2	0	0	Firmicutes_A	Clostridia	Lachnospirales	Lachnospiraceae	Ventrimonas	Ventrimonas sp900770535
DAE_46	DAE	DAE_b2190	28.1	2655541	2	57.53	3.51	FALSE	ok			1	1	0	0	Firmicutes_A	Clostridia	Lachnospirales	Lachnospiraceae	Blautia_A	Blautia_A sp000436615
DAE_47	DAE	DAE_b16809	27.9	712209	0	70.69	0	FALSE	none			0	0	0	0	Firmicutes_C	Negativicutes	Veillonellales	Dialisteraceae	Dialister	Dialister invisus
DAE_48	DAE	DAE_b10543_1	24.5	2032815	0	76.52	5.7	FALSE	none			0	0	0	0	Firmicutes_A	Clostridia	Oscillospirales	Oscillospiraceae	Lawsonibacter	Lawsonibacter sp900549405
DAE_49	DAE	DAE_b1538	24.1	2687355	0	52.46	0	FALSE	none			0	0	0	0	Firmicutes_A	Clostridia	Lachnospirales	Lachnospiraceae	Blautia_A	Blautia_A faecis
DAE_50	DAE	DAE_b4088	21.7	4083299	0	96.59	0.32	FALSE	none	s		0	0	0	0	Bacteroidota	Bacteroidia	Bacteroidales	Tannerellaceae	Parabacteroides	Parabacteroides merdae
DAE_51	DAE	DAE_b2222	21.1	1773368	0	83.58	3.02	FALSE	none			0	0	0	0	Firmicutes_A	Clostridia	Oscillospirales	Oscillospiraceae	CAG-83	CAG-83 sp000431575
DAE_52	DAE	DAE_b11266_1	20.5	2528669	0	83.37	8.28	FALSE	none			0	0	0	0	Firmicutes_A	Clostridia	Oscillospirales	Oscillospiraceae	Lawsonibacter	Lawsonibacter asaccharolyticus
DAE_53	DAE	DAE_b28208_1	19.3	3016714	0	89.32	7.65	FALSE	none	s		0	0	0	0	Firmicutes_A	Clostridia	Lachnospirales	Lachnospiraceae	Limivivens	Limivivens sp900543575
DAE_54	DAE	DAE_b2340_1	19	2303007	0	85.92	2.19	FALSE	none	s		0	0	0	0	Firmicutes_A	Clostridia	Lachnospirales	Lachnospiraceae	RUG115	RUG115 sp900066395
DAE_55	DAE	DAE_b11529	17.7	2161868	0	56.54	8.62	FALSE	none	a		0	0	0	0	Firmicutes_A	Clostridia	Oscillospirales	Oscillospiraceae	Dysosmobacter	Dysosmobacter welbionis
DAE_56	DAE	DAE_b24711_1	17.3	2328794	0	85.7	1.9	FALSE	none	s		0	0	0	0	Firmicutes_A	Clostridia	Lachnospirales	Lachnospiraceae	Clostridium_Q	Clostridium_Q fessum
DAE_57	DAE	DAE_b10576	15.3	2013657	0	63.45	1.72	FALSE	none			0	0	0	0	Firmicutes_A	Clostridia	Oscillospirales	Oscillospiraceae	Lawsonibacter	Lawsonibacter sp900066825
DAE_58	DAE	DAE_b17881	12.3	4954140	0	81.79	0.84	FALSE	none			0	0	0	0	Firmicutes_A	Clostridia	Lachnospirales	Lachnospiraceae	Enterocloster	Enterocloster sp900555045
DAE_59	DAE	DAE_b9813_1	11.7	2662664	0	65.93	6.14	FALSE	none			0	0	0	0	Firmicutes_A	Clostridia	Lachnospirales	Lachnospiraceae	Choladocola	Choladocola sp003480725
DAE_60	DAE	DAE_b13312	11.4	1557378	0	96.26	0.12	FALSE	none	t		0	0	0	0	Actinobacteriota	Coriobacteriia	Coriobacteriales	Eggerthellaceae	CAG-1427	CAG-1427 sp000435675
DAE_61	DAE	DAE_b8288_1	11.4	2686875	0	95.97	3.24	FALSE	none	a		0	0	0	0	Firmicutes_A	Clostridia	UBA1381	UBA1381	CAG-41	CAG-41 sp900066215
DAE_62	DAE	DAE_b16908	11.3	2101040	0	97.29	0.64	FALSE	none	s		0	0	0	0	Firmicutes	Bacilli	Lactobacillales	Streptococcaceae	Lactococcus	Lactococcus cremoris
DAE_63	DAE	DAE_b2799	11	1381720	0	58.62	3.45	FALSE	none	s		0	0	0	0	Firmicutes	Bacilli	Lactobacillales	Streptococcaceae	Streptococcus	Streptococcus thermophilus
DAE_64	DAE	DAE_b4528_1	10.5	2450127	0	65.39	1.75	FALSE	none			0	0	0	0	Firmicutes_A	Clostridia	Lachnospirales	Lachnospiraceae	CAG-95	CAG-95 sp900066375
DAE_65	DAE	DAE_b17585	10.4	2451701	0	74.51	0	FALSE	none	s		0	0	0	0	Firmicutes_A	Clostridia	Lachnospirales	Lachnospiraceae	Eubacterium_G	Eubacterium_G sp000434315
DAE_66	DAE	DAE_b232	9.9	2012718	0	62.44	0	FALSE	none			0	0	0	0	Firmicutes_A	Clostridia	Oscillospirales	Oscillospiraceae	Dysosmobacter	Dysosmobacter sp900544955
DAE_67	DAE	DAE_b13691	9.7	5417747	0	72.11	2.63	FALSE	none			0	0	0	0	Firmicutes_A	Clostridia	Lachnospirales	Lachnospiraceae	Enterocloster	Enterocloster bolteae
DAE_68	DAE	DAE_b19455	9.6	2384594	0	94.3	0.11	FALSE	none	a		0	0	0	0	Proteobacteria	Gammaproteobacteria	Burkholderiales	Burkholderiaceae	Parasutterella	Parasutterella excrementihominis
DAE_69	DAE	DAE_b3819	9.5	2445740	0	83.5	2.18	FALSE	none			0	0	0	0	Firmicutes_A	Clostridia	Oscillospirales	Oscillospiraceae	Enterenecus	Enterenecus sp900549885
DAE_70	DAE	DAE_b2804	9.3	1953284	0	63.98	2.59	FALSE	none	a		0	0	0	0	Actinobacteriota	Actinomycetia	Actinomycetales	Bifidobacteriaceae	Bifidobacterium	Bifidobacterium bifidum
DAE_71	DAE	DAE_b1018	9	1766974	0	82.63	0.34	FALSE	none			0	0	0	0	Firmicutes_A	Clostridia	Oscillospirales	Ruminococcaceae	Avimicrobium	Avimicrobium caecorum
DAE_72	DAE	DAE_b587	8.8	2444284	0	84.61	2.65	FALSE	none	s		0	0	0	0	Actinobacteriota	Coriobacteriia	Coriobacteriales	Eggerthellaceae	Adlercreutzia	Adlercreutzia celatus_A
DAE_73	DAE	DAE_b13112	7.4	3321378	0	78.71	0	FALSE	none			0	0	0	0	Bacteroidota	Bacteroidia	Bacteroidales	Marinifilaceae	Odoribacter	Odoribacter splanchnicus
DAE_74	DAE	DAE_b14699_1	7.4	1571888	0	63.04	1.75	FALSE	none	s		0	0	0	0	Firmicutes_A	Clostridia	Lachnospirales	Lachnospiraceae	Eubacterium_G	Eubacterium_G ventriosum
DAE_75	DAE	DAE_b15313	7.4	2882434	0	77.28	1.84	FALSE	none	s		0	0	0	0	Desulfobacterota_I	Desulfovibrionia	Desulfovibrionales	Desulfovibrionaceae	Bilophila	Bilophila wadsworthia
DAL_1	DAL	DAL_b18504_1	609.3	1503724	0	76.02	0.98	TRUE	too_many	f		0	0	0	0	Actinobacteriota	Actinomycetia	Actinomycetales	Bifidobacteriaceae	Bifidobacterium	Bifidobacterium adolescentis
DAL_2	DAL	DAL_b31320	320.1	2140265	3	95.16	1.98	TRUE	ok	y		76	57	0	0	Actinobacteriota	Coriobacteriia	Coriobacteriales	Coriobacteriaceae	Collinsella	Collinsella sp900541855
DAL_3	DAL	DAL_b30817_1	286.7	2049362	4	86.37	8.06	TRUE	ok	a		93	65	0	0	Firmicutes_A	Clostridia	Oscillospirales	Oscillospiraceae	CAG-170	CAG-170 sp002404795
DAL_4	DAL	DAL_b18815_1	204.6	1514839	0	84.88	3.25	TRUE	too_many	s		0	0	0	0	Bacteroidota	Bacteroidia	Bacteroidales	Rikenellaceae	Alistipes	Alistipes putredinis
DAL_5	DAL	DAL_b36418_1	196.9	2027736	4	80.73	3.04	TRUE	ok			30	14	1	1	Firmicutes_A	Clostridia	Oscillospirales	Oscillospiraceae	CAG-83	CAG-83 sp000435555
DAL_6	DAL	DAL_b14197	172.6	1237656	0	56.9	1.72	TRUE	none	a		0	0	0	0	Firmicutes_A	Clostridia	Oscillospirales	Acutalibacteraceae	Ruminococcus_E	Ruminococcus_E bromii_B
DAL_7	DAL	DAL_b45042	135.1	1695781	0	76.51	0	TRUE	none			0	0	0	0	Firmicutes_A	Clostridia	Oscillospirales	Acutalibacteraceae	Eubacterium_R	Eubacterium_R sp900547915
DAL_8	DAL	DAL_b7129_1	129.8	3991456	3	74.64	0	TRUE	ok	s		3	2	0	0	Bacteroidota	Bacteroidia	Bacteroidales	Bacteroidaceae	Bacteroides	Bacteroides uniformis
DAL_9	DAL	DAL_b31905_1	121	1443097	0	63.04	2.9	TRUE	too_many			0	0	0	0	Firmicutes_A	Clostridia	Oscillospirales	Oscillospiraceae	ER4	ER4 sp900317525
DAL_10	DAL	DAL_b19033	118.2	2691027	0	97.96	0.04	FALSE	none			0	0	0	0	Verrucomicrobiota	Verrucomicrobiae	Verrucomicrobiales	Akkermansiaceae	Akkermansia	Akkermansia muciniphila
DAL_11	DAL	DAL_b5401_1	112.4	2737466	5	92.15	3.8	FALSE	ok			27	9	0	0	Firmicutes_A	Clostridia	Lachnospirales	Lachnospiraceae	Agathobacter	Agathobacter rectalis
DAL_12	DAL	DAL_b7063_1	93.8	5041821	0	63.79	2.59	FALSE	too_many	s		0	0	0	0	Bacteroidota	Bacteroidia	Bacteroidales	Bacteroidaceae	Bacteroides	Bacteroides ovatus
DAL_13	DAL	DAL_b9395_1	84.6	3367391	3	76.36	0	FALSE	ok	s		11	6	3	1	Bacteroidota	Bacteroidia	Bacteroidales	Bacteroidaceae	Phocaeicola	Phocaeicola plebeius_A
DAL_14	DAL	DAL_b27110	81.1	2031492	0	93.87	1.01	FALSE	none	a		0	0	0	0	Firmicutes_A	Clostridia	Oscillospirales	Acutalibacteraceae	CAG-177	CAG-177 sp003514385
DAL_15	DAL	DAL_b29051	72.8	1964558	0	68.07	3.45	FALSE	none			0	0	0	0	Actinobacteriota	Actinomycetia	Actinomycetales	Bifidobacteriaceae	Bifidobacterium	Bifidobacterium longum
DAL_16	DAL	DAL_b49011_1	70.8	2550368	2	72.76	9.48	FALSE	ok			37	4	34	4	Bacteroidota	Bacteroidia	Bacteroidales	Rikenellaceae	Alistipes	Alistipes shahii
DAL_17	DAL	DAL_b37329_1	65.8	2218090	0	58.54	1.72	FALSE	none	s		0	0	0	0	Bacteroidota	Bacteroidia	Bacteroidales	Rikenellaceae	Alistipes	Alistipes dispar
DAL_18	DAL	DAL_b43625_1	59.6	2618198	2	82.33	5.38	FALSE	ok			67	48	0	0	Firmicutes_A	Clostridia	Lachnospirales	Lachnospiraceae	Fusicatenibacter	Fusicatenibacter saccharivorans
DAL_19	DAL	DAL_b18093_1	59.2	3038656	2	93.93	1.4	FALSE	ok	s		2	1	0	0	Firmicutes_A	Clostridia	Lachnospirales	Lachnospiraceae	Roseburia	Roseburia inulinivorans
DAL_20	DAL	DAL_b8185	58.4	5047764	0	97.92	0.42	FALSE	none	s		0	0	0	0	Proteobacteria	Gammaproteobacteria	Enterobacterales	Enterobacteriaceae	Klebsiella	Klebsiella pneumoniae
DAL_21	DAL	DAL_b1105_1	57.3	2198865	0	59.83	8.45	FALSE	none			0	0	0	0	Firmicutes_A	Clostridia	Oscillospirales	Oscillospiraceae	Flavonifractor	Flavonifractor avistercoris
DAL_22	DAL	DAL_b30709_1	57.1	2913962	2	75	0	FALSE	ok	s		6	0	0	0	Bacteroidota	Bacteroidia	Bacteroidales	Bacteroidaceae	Bacteroides	Bacteroides stercoris
DAL_23	DAL	DAL_b43544_1	56.3	1814601	2	85.77	5.65	FALSE	ok			2	1	0	0	Firmicutes_A	Clostridia	Oscillospirales	Oscillospiraceae	CAG-103	CAG-103 sp000432375
DAL_24	DAL	DAL_b1055_1	55.1	2695884	2	94.52	1.37	FALSE	ok			1	1	0	0	Firmicutes_A	Clostridia	Oscillospirales	Ruminococcaceae	Ruminococcus_D	Ruminococcus_D bicirculans
DAL_25	DAL	DAL_b6961	54.7	1511359	0	66.34	0	FALSE	none	t		0	0	0	0	Firmicutes_C	Negativicutes	Veillonellales	Dialisteraceae	Dialister	Dialister hominis
DAL_26	DAL	DAL_b28191_1	52.3	2939255	0	98.55	0.38	FALSE	none	s		0	0	0	0	Bacteroidota	Bacteroidia	Bacteroidales	Barnesiellaceae	Barnesiella	Barnesiella intestinihominis
DAL_27	DAL	DAL_b18407_1	51.4	2945641	0	93.24	6.75	FALSE	none	s		0	0	0	0	Firmicutes_A	Clostridia	Lachnospirales	Lachnospiraceae	Agathobacter	Agathobacter faecis
DAL_28	DAL	DAL_b16094_1	49.6	1995250	0	83.71	2.07	FALSE	none			0	0	0	0	Firmicutes_A	Clostridia	Oscillospirales	Oscillospiraceae	Faecousia	Faecousia sp003525905
DAL_29	DAL	DAL_b10077_1	48.1	2813244	4	70.69	3.45	FALSE	ok			28	6	1	1	Bacteroidota	Bacteroidia	Bacteroidales	Rikenellaceae	Alistipes	Alistipes onderdonkii
DAL_30	DAL	DAL_b35019_1	48	1897780	0	93.94	1.34	FALSE	none	t		0	0	0	0	Firmicutes_A	Clostridia	Christensenellales	CAG-138	PeH17	PeH17 sp000435055
DAL_31	DAL	DAL_b23424_1	42.7	2807363	0	90.03	4.94	FALSE	none			0	0	0	0	Firmicutes_A	Clostridia	Oscillospirales	Oscillospiraceae	Scatomorpha	Scatomorpha gallistercoris
DAL_32	DAL	DAL_b7571_1	41.5	2532602	0	86.96	6.25	FALSE	none	l		0	0	0	0	Bacteroidota	Bacteroidia	Bacteroidales	Rikenellaceae	Alistipes	Alistipes communis
DAL_33	DAL	DAL_b13221_1	39.6	2453161	3	87.13	6.15	FALSE	ok	a		6	3	0	0	Firmicutes_A	Clostridia	Oscillospirales	Ruminococcaceae	Gemmiger	Gemmiger qucibialis
DAL_34	DAL	DAL_b42188_1	39.6	2528551	0	88.39	3.64	FALSE	none	f		0	0	0	0	Actinobacteriota	Coriobacteriia	Coriobacteriales	Eggerthellaceae	Adlercreutzia	Adlercreutzia equolifaciens
DAL_35	DAL	DAL_b30284_1	39.3	1891291	0	62.13	0	FALSE	none			0	0	0	0	Actinobacteriota	Actinomycetia	Actinomycetales	Bifidobacteriaceae	Bifidobacterium	Bifidobacterium bifidum
DAL_36	DAL	DAL_b28720_1	38.9	3040633	0	75.86	5.17	FALSE	none	s		0	0	0	0	Bacteroidota	Bacteroidia	Bacteroidales	Bacteroidaceae	Phocaeicola	Phocaeicola barnesiae
DAL_37	DAL	DAL_b7528_1	38.1	2193964	0	97.62	1.01	FALSE	none	a		0	0	0	0	Firmicutes_A	Clostridia	Oscillospirales	Acutalibacteraceae	UBA1417	UBA1417 sp003531055
DAL_38	DAL	DAL_b29864	37.7	1449672	0	90.73	0.81	FALSE	none	i		0	0	0	0	Firmicutes_A	Clostridia	Christensenellales	CAG-314	CAG-314	CAG-314 sp000437915
DAL_39	DAL	DAL_b12027_1	30.4	1631124	0	66.02	1.72	FALSE	none			0	0	0	0	Firmicutes_A	Clostridia	Oscillospirales	Oscillospiraceae	CAG-83	CAG-83 sp000431575
DAL_40	DAL	DAL_b16243_1	29.1	2905040	0	94.44	5.49	FALSE	none	a		0	0	0	0	Firmicutes_A	Clostridia	Oscillospirales	Acutalibacteraceae	UMGS856	UMGS856 sp900546265
DAL_41	DAL	DAL_b33567_1	28.2	2288159	0	88.39	3.8	FALSE	none	a		0	0	0	0	Firmicutes_A	Clostridia	Oscillospirales	Ruminococcaceae	Negativibacillus	Negativibacillus faecipullorum
DAL_42	DAL	DAL_b46381_1	28.2	3201145	0	94.39	5.38	FALSE	none	s		0	0	0	0	Firmicutes_A	Clostridia	Christensenellales	CAG-74	Limiplasma	Limiplasma merdipullorum
DAL_43	DAL	DAL_b12854_1	26.5	1868530	0	52.04	4.31	FALSE	none			0	0	0	0	Firmicutes_A	Clostridia	Oscillospirales	Oscillospiraceae	Dysosmobacter	Dysosmobacter sp001916835
DAL_44	DAL	DAL_b23634_1	26.4	4555102	0	97.44	1.23	FALSE	none	l		0	0	0	0	Bacteroidota	Bacteroidia	Bacteroidales	Tannerellaceae	Parabacteroides	Parabacteroides distasonis
DAL_45	DAL	DAL_b30184_1	26	2229465	0	75.46	1.27	FALSE	none			0	0	0	0	Firmicutes_A	Clostridia	Lachnospirales	Lachnospiraceae	Blautia_A	Blautia_A obeum
DAL_46	DAL	DAL_b20606_1	24.6	2513622	0	92.23	6.06	FALSE	none	f		0	0	0	0	Firmicutes_A	Clostridia	Lachnospirales	Lachnospiraceae	Lachnospira	Lachnospira sp900316325
DAL_47	DAL	DAL_b6051_1	24.2	2768204	0	98.14	0.71	FALSE	none	s		0	0	0	0	Firmicutes_A	Clostridia	Lachnospirales	Lachnospiraceae	Eubacterium_F	Eubacterium_F sp003491505
DAL_48	DAL	DAL_b30989_1	23.5	3908982	0	98.52	1.81	FALSE	none	f		0	0	0	0	Desulfobacterota_I	Desulfovibrionia	Desulfovibrionales	Desulfovibrionaceae	Bilophila	Bilophila wadsworthia
DAL_49	DAL	DAL_b29258_1	23.2	3254388	0	62.93	0	FALSE	none	s		0	0	0	0	Bacteroidota	Bacteroidia	Bacteroidales	Bacteroidaceae	Phocaeicola	Phocaeicola massiliensis
DAL_50	DAL	DAL_b55990	22.9	2412328	2	94.16	2.9	FALSE	ok	l		9	3	9	3	Bacteroidota	Bacteroidia	Bacteroidales	Rikenellaceae	Alistipes_A	Alistipes_A ihumii
DAL_51	DAL	DAL_b7258_1	22.6	3131947	0	72.34	0	FALSE	none	s		0	0	0	0	Bacteroidota	Bacteroidia	Bacteroidales	Bacteroidaceae	Phocaeicola	Phocaeicola coprocola
DAL_52	DAL	DAL_b10093_2	22.4	1775109	0	89.91	3.7	FALSE	none	a		0	0	0	0	Actinobacteriota	Coriobacteriia	Coriobacteriales	QAMH01	QAMH01	QAMH01 sp900544245
DAL_53	DAL	DAL_b16625	22.3	2586729	0	89.22	6.44	FALSE	none	t		0	0	0	0	Firmicutes_A	Clostridia	Christensenellales	UBA1750	Spyradocola	Spyradocola merdavium
DAL_54	DAL	DAL_b45040_1	21.5	2143220	0	85.39	3.54	FALSE	none	a		0	0	0	0	Firmicutes_A	Clostridia	Oscillospirales	Acutalibacteraceae	Acutalibacter	Acutalibacter ornithocaccae
DAL_55	DAL	DAL_b3492_1	21.3	5168883	2	50	6.9	FALSE	ok	s		4	3	0	0	Bacteroidota	Bacteroidia	Bacteroidales	Bacteroidaceae	Bacteroides	Bacteroides faecis
DAL_56	DAL	DAL_b1894_1	21.2	2096455	0	85.69	3.4	FALSE	none	a		0	0	0	0	Firmicutes_A	Clostridia	Oscillospirales	Oscillospiraceae	Faecousia	Faecousia sp000434635
DAL_57	DAL	DAL_b36_1	20.6	6288636	0	64.81	0	FALSE	none	s		0	0	0	0	Bacteroidota	Bacteroidia	Bacteroidales	Bacteroidaceae	Bacteroides	Bacteroides sp.
DAL_58	DAL	DAL_b4276	20.2	2794217	0	93.16	2.24	FALSE	none	s		0	0	0	0	Firmicutes_A	Clostridia	Christensenellales	CAG-74	UBA11524	UBA11524 sp000437595
DAL_59	DAL	DAL_b10155_1	19.1	2433555	0	57.24	2.59	FALSE	none			0	0	0	0	Firmicutes_A	Clostridia	Oscillospirales	Oscillospiraceae	Lawsonibacter	Lawsonibacter asaccharolyticus
DAL_60	DAL	DAL_b32879_1	19	2594974	0	92.1	6.74	FALSE	none	q		0	0	0	0	Firmicutes_A	Clostridia	Oscillospirales	Oscillospiraceae	Faecousia	Faecousia sp000435995
DAL_61	DAL	DAL_b18551	18.7	2977230	0	90.75	1.19	FALSE	none	a		0	0	0	0	Firmicutes_A	Clostridia	Oscillospirales	Ruminococcaceae	Ruthenibacterium	Ruthenibacterium lactatiformans
DAL_62	DAL	DAL_b21195_1	18.4	1439476	0	66.03	3.24	FALSE	none	s		0	0	0	0	Firmicutes_A	Clostridia	Oscillospirales	Oscillospiraceae	Evtepia	Evtepia gabavorous
DAL_63	DAL	DAL_b39114_1	18.1	2543502	0	93.37	0.22	FALSE	none	l		0	0	0	0	Firmicutes_A	Clostridia	Lachnospirales	Lachnospiraceae	Lachnospira	Lachnospira rogosae_A
DAL_64	DAL	DAL_b33864_1	17.8	2545939	0	96.28	2.71	FALSE	none	s		0	0	0	0	Firmicutes_A	Clostridia	Lachnospirales	Lachnospiraceae	Anaerostipes	Anaerostipes hadrus
DAL_65	DAL	DAL_b11263_1	17.1	2062849	0	86.42	1.03	FALSE	none	a		0	0	0	0	Firmicutes_A	Clostridia	Oscillospirales	CAG-382	Woodwardibium	Woodwardibium sp900760275
DAL_66	DAL	DAL_b8030_1	16	2725394	0	96.82	0	FALSE	none	v		0	0	0	0	Proteobacteria	Gammaproteobacteria	Burkholderiales	Burkholderiaceae	Turicimonas	Turicimonas sp900542195
DAL_67	DAL	DAL_b9418_1	15.8	2568078	0	96.54	1.81	FALSE	none	s		0	0	0	0	Firmicutes_A	Clostridia	Lachnospirales	Lachnospiraceae	Coprococcus	Coprococcus sp000154245
DAL_68	DAL	DAL_b21823_1	15.4	3327923	0	94.39	1.34	FALSE	none	s		0	0	0	0	Firmicutes_A	Clostridia	Lachnospirales	Lachnospiraceae	Butyribacter	Butyribacter intestini
DAL_69	DAL	DAL_b27681	15.3	2226779	0	96.23	4.72	FALSE	none	t		0	0	0	0	Firmicutes	Bacilli	Erysipelotrichales	Erysipelotrichaceae	Merdibacter	Merdibacter merdipullorum
DAL_70	DAL	DAL_b5964_1	15.3	1797490	0	62.85	1.72	FALSE	none			0	0	0	0	Firmicutes_A	Clostridia	Oscillospirales	Butyricicoccaceae	Agathobaculum	Agathobaculum sp003481705
DAL_71	DAL	DAL_b13939_1	15	2914800	0	94.2	1.57	FALSE	none	a		0	0	0	0	Firmicutes_A	Clostridia	Oscillospirales	Acutalibacteraceae	Caccousia	Caccousia sp900752115
DAL_72	DAL	DAL_b35556	14.6	3147291	0	98.06	0.99	FALSE	none	s		0	0	0	0	Desulfobacterota_I	Desulfovibrionia	Desulfovibrionales	Desulfovibrionaceae	Desulfovibrio	Desulfovibrio fairfieldensis
DAL_73	DAL	DAL_b9165_1	14.6	3104749	0	91.25	3.66	FALSE	none	s		0	0	0	0	Firmicutes_A	Clostridia	Lachnospirales	Lachnospiraceae	KLE1615	KLE1615 sp900066985
DAL_74	DAL	DAL_b37775	14.1	1642038	0	98.67	0.11	FALSE	none	t		0	0	0	0	Firmicutes	Bacilli	ML615J-28	CAG-313	CAG-313	CAG-313 sp000433035
DAL_75	DAL	DAL_b29290	13.3	2718312	0	98.39	1.15	FALSE	none	v		0	0	0	0	Desulfobacterota_I	Desulfovibrionia	Desulfovibrionales	Desulfovibrionaceae	Mailhella	Mailhella merdigallinarum
DAL_76	DAL	DAL_b41084_1	12.7	2383132	0	85.99	4.64	FALSE	none	s		0	0	0	0	Firmicutes_A	Clostridia	Lachnospirales	Lachnospiraceae	Clostridium_Q	Clostridium_Q fessum
DAL_77	DAL	DAL_b22081_1	12.5	2020305	0	82.07	0	FALSE	none			0	0	0	0	Firmicutes_A	Clostridia	Lachnospirales	Lachnospiraceae	AM51-8	AM51-8 sp003478275
DAL_78	DAL	DAL_b29879_1	12.4	1911719	0	73.59	5.26	FALSE	none	s		0	0	0	0	Firmicutes_A	Clostridia	Lachnospirales	Lachnospiraceae	UBA11774	UBA11774 sp003507655
DAL_79	DAL	DAL_b35167_1	12.3	3295295	0	55.14	5.26	FALSE	none	s		0	0	0	0	Firmicutes_A	Clostridia	Lachnospirales	Lachnospiraceae	Blautia_A	Blautia_A faecis
DAL_80	DAL	DAL_b21268_1	12.2	1679241	0	96.33	1.5	FALSE	none	r		0	0	0	0	Firmicutes_A	Clostridia	Christensenellales	CAG-138	SFEL01	SFEL01 sp004557245
DAL_81	DAL	DAL_b26034	12	1753826	0	78.25	4.7	FALSE	none	a		0	0	0	0	Firmicutes_A	Clostridia	Oscillospirales	Oscillospiraceae	F23-B02	F23-B02 sp001916715
DAL_82	DAL	DAL_b12161	11.9	2096002	0	91.33	1.85	FALSE	none			0	0	0	0	Firmicutes_A	Clostridia	Oscillospirales	CAG-272	CAG-448	CAG-448 sp003150135
DAL_83	DAL	DAL_b6871_1	11.7	2472824	0	86.01	5.8	FALSE	none	s		0	0	0	0	Firmicutes_A	Clostridia	Lachnospirales	Lachnospiraceae	UMGS1375	UMGS1375 sp900066615
DAL_84	DAL	DAL_b22499	11.6	3601958	0	84.12	1.72	FALSE	none	s		0	0	0	0	Bacteroidota	Bacteroidia	Bacteroidales	Marinifilaceae	Odoribacter	Odoribacter splanchnicus
DAL_85	DAL	DAL_b6260_1	11.4	3281735	0	84.51	3.47	FALSE	none	s		0	0	0	0	Firmicutes_A	Clostridia	Lachnospirales	Lachnospiraceae	Anaerobutyricum	Anaerobutyricum hallii
DAL_86	DAL	DAL_b11148_1	11.1	2538628	0	74.62	3.83	FALSE	none	s		0	0	0	0	Firmicutes_A	Clostridia	Lachnospirales	Lachnospiraceae	Eubacterium_I	Eubacterium_I ramulus
DAL_87	DAL	DAL_b25340_2	11	2818828	0	75.93	0	FALSE	none	s		0	0	0	0	Firmicutes_A	Clostridia	Lachnospirales	Lachnospiraceae	Lachnospira	Lachnospira eligens_A
DAL_88	DAL	DAL_b17730	10.8	2251542	0	54.02	5.26	FALSE	none			0	0	0	0	Firmicutes_A	Clostridia	Lachnospirales	Lachnospiraceae	Acetatifactor	Acetatifactor sp900066565
DAL_89	DAL	DAL_b5829_1	10.5	2094935	0	81.21	2.13	FALSE	none			0	0	0	0	Firmicutes_A	Clostridia	Oscillospirales	Acutalibacteraceae	Acutalibacter	Acutalibacter stercorigallinarum
DAL_90	DAL	DAL_b32056_1	10.4	1951075	0	62.15	4.39	FALSE	none			0	0	0	0	Firmicutes_A	Clostridia	Lachnospirales	Lachnospiraceae	Blautia_A	Blautia_A sp000285855
DAL_91	DAL	DAL_b58972_1	10.1	1583637	0	59.83	5.17	FALSE	none			0	0	0	0	Firmicutes_A	Clostridia	Oscillospirales	Oscillospiraceae	CAG-83	CAG-83 sp900756715
DAL_92	DAL	DAL_b18161_1	9.8	1732577	0	67.4	3.45	FALSE	none			0	0	0	0	Firmicutes_A	Clostridia	Oscillospirales	Oscillospiraceae	Limivicinus	Limivicinus sp900547315
DAL_93	DAL	DAL_b5917_1	9.6	3880974	0	88.97	2.3	FALSE	none	s		0	0	0	0	Bacteroidota	Bacteroidia	Bacteroidales	Tannerellaceae	Parabacteroides	Parabacteroides merdae
DAL_94	DAL	DAL_b19812	9.4	2939491	0	86.4	3.29	FALSE	none	s		0	0	0	0	Firmicutes_A	Clostridia	Christensenellales	CAG-74	Alectryocaccomicrobium	Alectryocaccomicrobium faecavium
DAL_95	DAL	DAL_b7797_1	9.2	2240995	0	87.95	0	FALSE	none	s		0	0	0	0	Firmicutes_A	Clostridia	Lachnospirales	Lachnospiraceae	Copromonas	Copromonas avistercoris
DAL_96	DAL	DAL_b4564_1	9	1785857	0	79.16	2.4	FALSE	none			0	0	0	0	Firmicutes_A	Clostridia	Oscillospirales	Oscillospiraceae	Faecousia	Faecousia sp900544405
DAL_97	DAL	DAL_b34124_1	8.9	1906410	0	54.08	7.02	FALSE	none	s		0	0	0	0	Firmicutes_A	Clostridia	Lachnospirales	Lachnospiraceae	Bariatricus	Bariatricus comes
DAL_98	DAL	DAL_b1830_1	8.8	737641	0	63.79	1.72	FALSE	none	s		0	0	0	0	Firmicutes_A	Clostridia	Peptostreptococcales	Peptostreptococcaceae	Romboutsia	Romboutsia timonensis
DAL_99	DAL	DAL_b32830_1	8.7	4778560	0	85.93	0.88	FALSE	none			0	0	0	0	Firmicutes_A	Clostridia	Lachnospirales	Lachnospiraceae	Muricomes	Muricomes contortus_B
DAL_100	DAL	DAL_b25016	8.3	1772274	0	91.79	1.61	FALSE	none	s		0	0	0	0	Firmicutes_A	Clostridia	Christensenellales	QALW01	QALW01	QALW01 sp003150515
DAL_101	DAL	DAL_b18218	7.8	2164643	0	56.49	9.65	FALSE	none	s		0	0	0	0	Firmicutes_A	Clostridia	Lachnospirales	Lachnospiraceae	Oliverpabstia	Oliverpabstia intestinalis
DAL_102	DAL	DAL_b11675	7.6	1782205	0	81.98	0.89	FALSE	none	a		0	0	0	0	Firmicutes_A	Clostridia	Oscillospirales	Acutalibacteraceae	UMGS1474	UMGS1474 sp900547105
DAL_103	DAL	DAL_b608	7.4	2853318	0	56.81	0	FALSE	none	s		0	0	0	0	Firmicutes_A	Clostridia	Lachnospirales	Lachnospiraceae	Enterocloster	Enterocloster sp000431375
DAL_104	DAL	DAL_b24752_1	7.3	1640463	0	68.37	1.68	FALSE	none	a		0	0	0	0	Firmicutes_A	Clostridia	UBA1381	UBA1381	CAG-41	CAG-41 sp900066215
DAL_105	DAL	DAL_b17684_1	7	1600281	0	79.74	0.34	FALSE	none	a		0	0	0	0	Firmicutes_A	Clostridia	Oscillospirales	Ruminococcaceae	Ruminococcus_C	Ruminococcus_C sp900545285
DAL_106	DAL	DAL_b12837_1	6.8	1321278	0	73.81	1.68	FALSE	none			0	0	0	0	Firmicutes_A	Clostridia	Oscillospirales	Ruminococcaceae	UBA3818	UBA3818 sp904397845
DAL_107	DAL	DAL_b5588_1	6.4	1182507	0	50.17	1.72	FALSE	none	a		0	0	0	0	Actinobacteriota	Coriobacteriia	Coriobacteriales	QAMH01	QAMH01	QAMH01 sp.
DAL_108	DAL	DAL_b5309_1	6.1	1802320	0	74.48	1.72	FALSE	none	s		0	0	0	0	Proteobacteria	Gammaproteobacteria	Burkholderiales	Burkholderiaceae	Sutterella	Sutterella wadsworthensis_A
DAL_109	DAL	DAL_b12689_1	5.9	1905105	0	50.48	0	FALSE	none			0	0	0	0	Firmicutes_A	Clostridia	Lachnospirales	Lachnospiraceae	Faecalimonas	Faecalimonas phoceensis
DAL_110	DAL	DAL_b15036	5.9	1288644	0	63.22	1.92	FALSE	none	s		0	0	0	0	Firmicutes_A	Clostridia	Christensenellales	Borkfalkiaceae	UMGS621	UMGS621 sp900543915
DAL_111	DAL	DAL_b23870_1	5.9	1926906	0	68.8	1.57	FALSE	none	s		0	0	0	0	Firmicutes_A	Clostridia	Lachnospirales	Lachnospiraceae	Butyribacter	Butyribacter sp003529475
DAL_112	DAL	DAL_b5562_1	5.7	1579065	0	50.97	6.03	FALSE	none	a		0	0	0	0	Firmicutes_A	Clostridia	Oscillospirales	Ruminococcaceae	Merdivicinus	Merdivicinus sp900555435
DAL_113	DAL	DAL_b28896	5.3	884380	0	67.18	9.44	FALSE	none	s		0	0	0	0	Firmicutes	Bacilli	RF39	UBA660	Onthocola_B	Onthocola_B sp900544625
DAL_114	DAL	DAL_b55270_1	5	861472	0	57.15	0.38	FALSE	none	s		0	0	0	0	Firmicutes	Bacilli	RFN20	CAG-288	CAG-288	CAG-288 sp000437395
DAO_1	DAO	DAO_b29465_1	587.9	2075020	0	96.13	2.28	TRUE	too_many	s		0	0	0	0	Firmicutes_A	Clostridia	Lachnospirales	Lachnospiraceae	Agathobacter	Agathobacter rectalis
DAO_2	DAO	DAO_b6915_1	408.8	5293672	0	59.31	0	TRUE	too_many			0	0	0	0	Bacteroidota	Bacteroidia	Bacteroidales	Bacteroidaceae	Bacteroides	Bacteroides ovatus
DAO_3	DAO	DAO_b19096_1	400.2	3864578	0	79.47	0	TRUE	too_many	s		0	0	0	0	Bacteroidota	Bacteroidia	Bacteroidales	Bacteroidaceae	Bacteroides	Bacteroides uniformis
DAO_4	DAO	DAO_b42955_1	244.4	2954018	4	70.85	1.72	TRUE	ok			30	15	6	6	Bacteroidota	Bacteroidia	Bacteroidales	Bacteroidaceae	Bacteroides	Bacteroides stercoris
DAO_5	DAO	DAO_b22681_1	206.4	3016533	2	91.47	0.12	FALSE	ok	l		49	6	0	0	Bacteroidota	Bacteroidia	Bacteroidales	Bacteroidaceae	Phocaeicola	Phocaeicola coprocola
DAO_6	DAO	DAO_b15469_1	196.9	2443632	0	87.46	3.16	TRUE	too_many			0	0	0	0	Firmicutes_A	Clostridia	Lachnospirales	Lachnospiraceae	Fusicatenibacter	Fusicatenibacter saccharivorans
DAO_7	DAO	DAO_b5692_1	163	4178344	0	93.37	1.63	TRUE	too_many	s		0	0	0	0	Bacteroidota	Bacteroidia	Bacteroidales	Bacteroidaceae	Phocaeicola	Phocaeicola vulgatus
DAO_8	DAO	DAO_b13815_1	117.6	4269550	2	63.4	1.72	FALSE	ok	s		33	11	0	0	Bacteroidota	Bacteroidia	Bacteroidales	Bacteroidaceae	Bacteroides	Bacteroides caccae
DAO_9	DAO	DAO_b21998	106.1	2163870	0	96.9	7.29	FALSE	none	s		0	0	0	0	Bacteroidota	Bacteroidia	Bacteroidales	Rikenellaceae	Alistipes	Alistipes putredinis
DAO_10	DAO	DAO_b8331	93.5	2711217	2	78.79	1.72	TRUE	ok	l		73	14	0	0	Bacteroidota	Bacteroidia	Bacteroidales	Rikenellaceae	Alistipes	Alistipes onderdonkii
DAO_11	DAO	DAO_b10907_1	92.5	2237907	2	88.13	1.04	FALSE	ok			0	0	0	0	Firmicutes_A	Clostridia	Oscillospirales	Ruminococcaceae	Gemmiger	Gemmiger formicilis
DAO_12	DAO	DAO_b1858_1	86.4	1970509	0	56.32	4.39	FALSE	too_many	s		0	0	0	0	Firmicutes_A	Clostridia	Lachnospirales	Lachnospiraceae	Blautia_A	Blautia_A wexlerae
DAO_13	DAO	DAO_b27914_1	82.9	2728955	2	96.47	3.53	FALSE	ok	s		2	1	0	0	Firmicutes_A	Clostridia	Lachnospirales	Lachnospiraceae	UMGS1375	UMGS1375 sp900066615
DAO_14	DAO	DAO_b14399	73.1	2771035	0	91.23	4.51	FALSE	none	s		0	0	0	0	Firmicutes_A	Clostridia	Lachnospirales	Lachnospiraceae	Roseburia	Roseburia hominis
DAO_15	DAO	DAO_b16438	72.9	1474950	0	72.69	1.61	FALSE	too_many	f		0	0	0	0	Actinobacteriota	Coriobacteriia	Coriobacteriales	Coriobacteriaceae	Collinsella	Collinsella sp900545505
DAO_16	DAO	DAO_b39899_1	72.8	2476840	2	56.65	1.75	FALSE	ok			38	8	0	0	Firmicutes_A	Clostridia	Lachnospirales	Lachnospiraceae	Blautia_A	Blautia_A massiliensis
DAO_17	DAO	DAO_b12054_1	67.5	2120714	0	54.15	0	FALSE	none			0	0	0	0	Firmicutes_A	Clostridia	Lachnospirales	Lachnospiraceae	Anaerostipes	Anaerostipes hadrus_A
DAO_18	DAO	DAO_b30165	64.9	2330387	0	95	0	FALSE	none	i		0	0	0	0	Proteobacteria	Gammaproteobacteria	Burkholderiales	Burkholderiaceae	Mesosutterella	Mesosutterella massiliensis
DAO_19	DAO	DAO_b35133_1	59.1	1827527	2	88.56	2.18	FALSE	ok			6	5	2	2	Actinobacteriota	Actinomycetia	Actinomycetales	Bifidobacteriaceae	Bifidobacterium	Bifidobacterium longum
DAO_20	DAO	DAO_b5645_1	55.8	2749010	0	97.75	0	FALSE	none	a		0	0	0	0	Firmicutes_A	Clostridia	Oscillospirales	Ruminococcaceae	Ruminococcus_D	Ruminococcus_D bicirculans
DAO_21	DAO	DAO_b19991_1	53.7	5205119	0	54.31	0	FALSE	none			0	0	0	0	Bacteroidota	Bacteroidia	Bacteroidales	Bacteroidaceae	Bacteroides	Bacteroides thetaiotaomicron
DAO_22	DAO	DAO_b26184	51.5	2658132	0	94.04	1.34	FALSE	none	s		0	0	0	0	Firmicutes_A	Clostridia	Lachnospirales	Lachnospiraceae	Lachnospira	Lachnospira eligens_A
DAO_23	DAO	DAO_b19399_1	50.8	2328928	2	66.11	5.26	FALSE	ok			1	2	0	0	Firmicutes_A	Clostridia	Lachnospirales	Lachnospiraceae	Dorea_A	Dorea_A longicatena_B
DAO_24	DAO	DAO_b9426_1	48.2	2901542	2	88.18	2.9	FALSE	ok	s		1	1	0	0	Firmicutes_A	Clostridia	Lachnospirales	Lachnospiraceae	KLE1615	KLE1615 sp900066985
DAO_25	DAO	DAO_b11294_1	42.6	2755192	0	93.56	0.67	FALSE	none	s		0	0	0	0	Firmicutes_A	Clostridia	Lachnospirales	Lachnospiraceae	Coprococcus	Coprococcus eutactus_A
DAO_26	DAO	DAO_b27988_1	40.8	2314510	0	79.03	3.51	FALSE	none	s		0	0	0	0	Firmicutes_A	Clostridia	Lachnospirales	Lachnospiraceae	Bariatricus	Bariatricus comes
DAO_27	DAO	DAO_b15834_1	39.3	2558359	0	50.35	1.75	FALSE	none			0	0	0	0	Firmicutes_A	Clostridia	Lachnospirales	Lachnospiraceae	Enterocloster	Enterocloster sp000431375
DAO_28	DAO	DAO_b29359_1	38.4	1539390	0	74.88	1.3	FALSE	none	a		0	0	0	0	Firmicutes_A	Clostridia	Oscillospirales	Oscillospiraceae	Dysosmobacter	Dysosmobacter sp001916835
DAO_29	DAO	DAO_b2336_1	38.1	2568059	0	93.61	0.02	FALSE	none			0	0	0	0	Firmicutes_A	Clostridia	Lachnospirales	Lachnospiraceae	Butyribacter	Butyribacter sp003529475
DAO_30	DAO	DAO_b23250_1	35.1	1795220	0	86.76	2.57	FALSE	none	a		0	0	0	0	Firmicutes_A	Clostridia	Oscillospirales	Oscillospiraceae	CAG-83	CAG-83 sp001916855
DAO_31	DAO	DAO_b25377_1	34.9	1509599	0	64.66	0	FALSE	none			0	0	0	0	Firmicutes_A	Clostridia	Lachnospirales	Lachnospiraceae	Mediterraneibacter	Mediterraneibacter faecis
DAO_32	DAO	DAO_b9019_2	34.7	3034579	0	95.02	1.85	FALSE	none	s		0	0	0	0	Firmicutes_A	Clostridia	Lachnospirales	Lachnospiraceae	Anaerobutyricum	Anaerobutyricum hallii
DAO_33	DAO	DAO_b29016_1	32.2	2648853	0	93.39	2.69	FALSE	none	s		0	0	0	0	Firmicutes_A	Clostridia	Lachnospirales	Lachnospiraceae	Eubacterium_I	Eubacterium_I ramulus
DAO_34	DAO	DAO_b8075	30.6	1561040	0	79.8	2.64	FALSE	none	s		0	0	0	0	Firmicutes_A	Clostridia	TANB77	CAG-508	Merdicola	Merdicola sp900552655
DAO_35	DAO	DAO_b38179_1	30.4	3216776	3	86.81	2.73	FALSE	ok	s		3	2	2	1	Firmicutes_A	Clostridia	Lachnospirales	Lachnospiraceae	Roseburia	Roseburia inulinivorans
DAO_36	DAO	DAO_b11764	30	2473068	0	96.66	2.25	FALSE	none	f		0	0	0	0	Actinobacteriota	Coriobacteriia	Coriobacteriales	Eggerthellaceae	Adlercreutzia	Adlercreutzia celatus_A
DAO_37	DAO	DAO_b36787_1	28.5	3123587	3	87.35	3.54	FALSE	ok			5	1	5	1	Firmicutes_A	Clostridia	Lachnospirales	Lachnospiraceae	Acetatifactor	Acetatifactor sp900066565
DAO_38	DAO	DAO_b43116	28.5	2549099	0	72.76	4.31	FALSE	none			0	0	0	0	Bacteroidota	Bacteroidia	Bacteroidales	Rikenellaceae	Alistipes	Alistipes shahii
DAO_39	DAO	DAO_b41806_1	27.6	1946217	2	91.93	0.67	FALSE	ok	a		7	1	1	1	Firmicutes_A	Clostridia	Oscillospirales	Oscillospiraceae	ER4	ER4 sp000765235
DAO_40	DAO	DAO_b5148_1	24.2	2653230	0	91.17	1.52	FALSE	none	s		0	0	0	0	Firmicutes_A	Clostridia	Lachnospirales	Lachnospiraceae	Schaedlerella	Schaedlerella glycyrrhizinilytica_A
DAO_41	DAO	DAO_b7603_1	21.9	2200174	0	90.27	0.67	FALSE	none	a		0	0	0	0	Firmicutes_A	Clostridia	Oscillospirales	Ruminococcaceae	Ruminococcus_C	Ruminococcus_C callidus
DAO_42	DAO	DAO_b31385_1	21.7	2234388	0	72.6	3.51	FALSE	none	s		0	0	0	0	Firmicutes_A	Clostridia	Lachnospirales	Lachnospiraceae	Dorea	Dorea formicigenerans
DAO_43	DAO	DAO_b8793_1	21.3	2454789	2	90.39	4.85	FALSE	ok	s		2	1	0	0	Firmicutes_A	Clostridia	Lachnospirales	Lachnospiraceae	Eisenbergiella	Eisenbergiella sp900066775
DAO_44	DAO	DAO_b3408_1	21.1	2333076	0	54.39	5.26	FALSE	none			0	0	0	0	Firmicutes_A	Clostridia	Lachnospirales	Lachnospiraceae	Ventrimonas	Ventrimonas sp003480315
DAO_45	DAO	DAO_b36742	20.6	1863878	0	95.6	1.98	FALSE	none	s		0	0	0	0	Actinobacteriota	Actinomycetia	Actinomycetales	Bifidobacteriaceae	Bifidobacterium	Bifidobacterium animalis
DAO_46	DAO	DAO_b13949	20.4	2201145	0	58.19	8.77	FALSE	none	s		0	0	0	0	Firmicutes_A	Clostridia	Lachnospirales	Lachnospiraceae	Copromonas	Copromonas sp900066785
DAO_47	DAO	DAO_b9218	19.3	2161872	0	84.72	1.33	FALSE	none	a		0	0	0	0	Firmicutes_A	Clostridia	Oscillospirales	Ruminococcaceae	Gemmiger	Gemmiger qucibialis
DAO_48	DAO	DAO_b7533	17.8	2853158	0	94.69	1.4	FALSE	none	s		0	0	0	0	Firmicutes_A	Clostridia	Christensenellales	CAG-74	UBA11524	UBA11524 sp000437595
DAO_49	DAO	DAO_b4223	16.8	2155385	0	76.31	1.27	FALSE	none	s		0	0	0	0	Firmicutes_A	Clostridia	Lachnospirales	Lachnospiraceae	Clostridium_Q	Clostridium_Q fessum
DAO_50	DAO	DAO_b6445_1	16	2605549	0	72.93	1.72	FALSE	none	s		0	0	0	0	Firmicutes_A	Clostridia	Lachnospirales	Lachnospiraceae	Ruminococcus_B	Ruminococcus_B gnavus
DAO_51	DAO	DAO_b28245_1	15.8	4428557	0	60.34	0	FALSE	none			0	0	0	0	Bacteroidota	Bacteroidia	Bacteroidales	Bacteroidaceae	Bacteroides	Bacteroides fragilis
DAO_52	DAO	DAO_b18454_1	15.3	2171342	0	50.32	0	FALSE	none			0	0	0	0	Firmicutes_A	Clostridia	Lachnospirales	Lachnospiraceae	Blautia_A	Blautia_A faecis
DAO_53	DAO	DAO_b13250	15.2	2534098	0	75.76	1.75	FALSE	none	s		0	0	0	0	Firmicutes_A	Clostridia	Lachnospirales	Lachnospiraceae	Lachnospira	Lachnospira sp000436475
DAO_54	DAO	DAO_b13643	15.2	2641187	0	73.64	7.02	FALSE	none	s		0	0	0	0	Firmicutes_A	Clostridia	Lachnospirales	Lachnospiraceae	Lachnospira	Lachnospira sp000437735
DAO_55	DAO	DAO_b17988_1	13.3	4164133	2	79.64	2.59	FALSE	ok	s		2	1	0	0	Bacteroidota	Bacteroidia	Bacteroidales	Tannerellaceae	Parabacteroides	Parabacteroides johnsonii
DAO_56	DAO	DAO_b18761	13.1	1930463	0	84.47	2.36	FALSE	none	s		0	0	0	0	Actinobacteriota	Actinomycetia	Actinomycetales	Bifidobacteriaceae	Bifidobacterium	Bifidobacterium adolescentis
DAO_57	DAO	DAO_b3194	12.7	2262829	0	63.28	5.17	FALSE	none			0	0	0	0	Bacteroidota	Bacteroidia	Bacteroidales	Rikenellaceae	Alistipes	Alistipes communis
DAO_58	DAO	DAO_b11684_1	12.6	2659278	0	85.78	2.53	FALSE	none			0	0	0	0	Firmicutes_A	Clostridia	Lachnospirales	Lachnospiraceae	Choladocola	Choladocola sp003480725
DAO_59	DAO	DAO_b44784	12.5	2543389	0	85.89	4.19	FALSE	none			0	0	0	0	Firmicutes_A	Clostridia	Oscillospirales	Oscillospiraceae	Lawsonibacter	Lawsonibacter asaccharolyticus
DAO_60	DAO	DAO_b12937_1	12.3	1667913	0	78.68	2.15	FALSE	none	s		0	0	0	0	Firmicutes_A	Clostridia	TANB77	CAG-508	CAG-245	CAG-245 sp000435175
DAO_61	DAO	DAO_b32068_1	12.1	2536466	0	56.14	0	FALSE	none			0	0	0	0	Firmicutes_A	Clostridia	Lachnospirales	Lachnospiraceae	Blautia_A	Blautia_A sp900548245
DAO_62	DAO	DAO_b42885_1	12.1	2837709	0	92.97	3.02	FALSE	none	s		0	0	0	0	Firmicutes_A	Clostridia	Lachnospirales	Lachnospiraceae	Eubacterium_F	Eubacterium_F sp003491505
DAO_63	DAO	DAO_b13882_1	11.9	2436818	0	63.16	7.89	FALSE	none	s		0	0	0	0	Firmicutes_A	Clostridia	Lachnospirales	Lachnospiraceae	Oliverpabstia	Oliverpabstia intestinalis
DAO_64	DAO	DAO_b18153	10.2	2451020	0	76.97	2.63	FALSE	none			0	0	0	0	Firmicutes_A	Clostridia	Lachnospirales	Lachnospiraceae	Eubacterium_G	Eubacterium_G sp000434315
DAO_65	DAO	DAO_b36122_1	10.2	2734728	0	99.84	2.19	FALSE	none	a		0	0	0	0	Proteobacteria	Gammaproteobacteria	Burkholderiales	Burkholderiaceae	Parasutterella	Parasutterella excrementihominis
DAO_66	DAO	DAO_b19125_1	10.1	2337612	0	63.62	2.63	FALSE	none	s		0	0	0	0	Firmicutes_A	Clostridia	Lachnospirales	Lachnospiraceae	Coprococcus_A	Coprococcus_A catus
DAO_67	DAO	DAO_b2939_1	10.1	2481686	0	94.71	1.68	FALSE	none	a		0	0	0	0	Firmicutes_A	Clostridia	UBA1381	UBA1381	CAG-41	CAG-41 sp900066215
DAO_68	DAO	DAO_b44458	9.9	3158792	0	94.7	3.02	FALSE	none	s		0	0	0	0	Bacteroidota	Bacteroidia	Bacteroidales	Barnesiellaceae	Barnesiella	Barnesiella intestinihominis
DAO_69	DAO	DAO_b21845	9.5	1718065	0	73.09	1.34	FALSE	none	a		0	0	0	0	Firmicutes_A	Clostridia	Oscillospirales	Butyricicoccaceae	Agathobaculum	Agathobaculum butyriciproducens
DAO_70	DAO	DAO_b23064_1	9.5	3474771	0	99.62	0.94	FALSE	none	y		0	0	0	0	Firmicutes	Bacilli	Erysipelotrichales	Coprobacillaceae	Erysipelatoclostridium	Erysipelatoclostridium ramosum
DAO_71	DAO	DAO_b42133_1	9.5	1753322	0	94.6	1.51	FALSE	none	a		0	0	0	0	Firmicutes_A	Clostridia	Oscillospirales	Acutalibacteraceae	Eubacterium_R	Eubacterium_R sp000434995
DAO_72	DAO	DAO_b19266	8.5	4789762	0	94.59	1.61	FALSE	none	c		0	0	0	0	Bacteroidota	Bacteroidia	Bacteroidales	Marinifilaceae	Butyricimonas	Butyricimonas paravirosa
DAO_73	DAO	DAO_b3185_1	8.4	2339768	0	70.3	0	FALSE	none	s		0	0	0	0	Firmicutes_A	Clostridia	Lachnospirales	Lachnospiraceae	Mediterraneibacter	Mediterraneibacter torques
DAO_74	DAO	DAO_b10793_1	8	2323888	0	82.76	1.72	FALSE	none	s		0	0	0	0	Firmicutes_A	Clostridia	Peptostreptococcales	Peptostreptococcaceae	Romboutsia	Romboutsia timonensis
DAO_75	DAO	DAO_b32643_1	7.4	4166692	0	66.55	0	FALSE	none	s		0	0	0	0	Bacteroidota	Bacteroidia	Bacteroidales	Tannerellaceae	Parabacteroides	Parabacteroides distasonis
DAO_76	DAO	DAO_b21589	7.1	2315094	0	78.46	2.18	FALSE	none			0	0	0	0	Firmicutes_A	Clostridia	Lachnospirales	Lachnospiraceae	Eubacterium_F	Eubacterium_F sp900539115
DAO_77	DAO	DAO_b10318	6.9	1440704	0	71.9	0	FALSE	none	s		0	0	0	0	Firmicutes_A	Clostridia	Lachnospirales	Anaerotignaceae	Anaerotignum	Anaerotignum faecicola
DAO_78	DAO	DAO_b35237_1	6.8	1332238	0	57.46	1.01	FALSE	none	t		0	0	0	0	Firmicutes_C	Negativicutes	Veillonellales	Dialisteraceae	Dialister	Dialister hominis
DAO_79	DAO	DAO_b9695	6.7	1416760	0	56.03	4.31	FALSE	none	a		0	0	0	0	Firmicutes_A	Clostridia	Oscillospirales	Oscillospiraceae	Faecousia	Faecousia sp003525905
DAO_80	DAO	DAO_b43289	6.6	1515494	0	71.77	2.48	FALSE	none			0	0	0	0	Firmicutes_A	Clostridia	Oscillospirales	Oscillospiraceae	CAG-103	CAG-103 sp900317855
DAO_81	DAO	DAO_b35448_1	6.5	2267756	0	74.59	1.98	FALSE	none	s		0	0	0	0	Firmicutes	Bacilli	Erysipelotrichales	Coprobacillaceae	Faecalibacillus	Faecalibacillus intestinalis
DAO_82	DAO	DAO_b23310	5.7	1778734	0	58.1	1.78	FALSE	none	s		0	0	0	0	Desulfobacterota_I	Desulfovibrionia	Desulfovibrionales	Desulfovibrionaceae	Bilophila	Bilophila wadsworthia
DAO_83	DAO	DAO_b31759_1	5.3	2822987	0	50.45	0	FALSE	none			0	0	0	0	Bacteroidota	Bacteroidia	Bacteroidales	Marinifilaceae	Odoribacter	Odoribacter splanchnicus
DBL_1	DBL	DBL_b9416_1	949.2	1424893	0	70.78	1.57	TRUE	too_many	s		0	0	0	0	Firmicutes_A	Clostridia	Lachnospirales	Lachnospiraceae	Agathobacter	Agathobacter rectalis
DBL_2	DBL	DBL_b638_1	416.2	1548630	4	54.46	0	TRUE	ok			122	31	0	0	Firmicutes_A	Clostridia	Oscillospirales	Ruminococcaceae	Faecalibacterium	Faecalibacterium prausnitzii_G
DBL_3	DBL	DBL_b6353_1	412.6	2214104	0	86.55	2.22	TRUE	too_many	s		0	0	0	0	Firmicutes_A	Clostridia	Lachnospirales	Lachnospiraceae	Fusicatenibacter	Fusicatenibacter saccharivorans
DBL_4	DBL	DBL_b15290_1	407.4	1907001	4	61.61	3.57	TRUE	ok			384	75	2	2	Firmicutes_A	Clostridia	Oscillospirales	Ruminococcaceae	Faecalibacterium	Faecalibacterium prausnitzii_C
DBL_5	DBL	DBL_b12054	273.8	1946995	2	92.85	1.06	TRUE	ok	s		5	4	0	0	Actinobacteriota	Actinomycetia	Actinomycetales	Bifidobacteriaceae	Bifidobacterium	Bifidobacterium pseudocatenulatum
DBL_6	DBL	DBL_b3810_1	237.1	2327635	4	85.73	0.23	TRUE	ok			7	5	0	0	Firmicutes_A	Clostridia	Oscillospirales	Ruminococcaceae	Gemmiger	Gemmiger formicilis
DBL_7	DBL	DBL_b120_1	231.6	2833136	4	60.69	0	FALSE	ok			67	23	0	0	Bacteroidota	Bacteroidia	Bacteroidales	Bacteroidaceae	Bacteroides	Bacteroides stercoris
DBL_8	DBL	DBL_b1698	176	2202591	4	96.51	1.31	TRUE	ok	s		37	31	4	6	Actinobacteriota	Actinomycetia	Actinomycetales	Bifidobacteriaceae	Bifidobacterium	Bifidobacterium longum
DBL_9	DBL	DBL_b2704_1	175.3	2602864	0	89.02	5.45	TRUE	too_many	s		0	0	0	0	Firmicutes_A	Clostridia	Lachnospirales	Lachnospiraceae	Anaerostipes	Anaerostipes hadrus
DBL_10	DBL	DBL_b10731_1	159.5	4246369	2	82.05	1.72	FALSE	ok	s		20	2	0	0	Bacteroidota	Bacteroidia	Bacteroidales	Bacteroidaceae	Bacteroides	Bacteroides uniformis
DBL_11	DBL	DBL_b21837	138	2485483	0	98.14	0.62	TRUE	none	s		0	0	0	0	Proteobacteria	Gammaproteobacteria	Burkholderiales	Burkholderiaceae	Sutterella	Sutterella wadsworthensis_A
DBL_12	DBL	DBL_b7837_2	137.6	3231679	2	88.72	4.43	FALSE	ok	s		2	2	0	0	Firmicutes_A	Clostridia	Lachnospirales	Lachnospiraceae	Blautia_A	Blautia_A wexlerae
DBL_13	DBL	DBL_b2881_1	129.1	1924656	0	97.99	1.01	FALSE	none	a		0	0	0	0	Firmicutes_A	Clostridia	Oscillospirales	Acutalibacteraceae	Ruminococcus_E	Ruminococcus_E bromii_B
DBL_14	DBL	DBL_b15997_1	122.4	3222081	2	96.67	0.36	FALSE	ok	s		1	1	0	0	Firmicutes_A	Clostridia	Lachnospirales	Lachnospiraceae	Butyribacter	Butyribacter intestini
DBL_15	DBL	DBL_b5143_1	110.7	2260809	2	61.4	0.88	FALSE	ok	s		76	14	2	1	Firmicutes_A	Clostridia	Lachnospirales	Lachnospiraceae	Blautia_A	Blautia_A schinkii
DBL_16	DBL	DBL_b19982_1	107.6	2648241	3	95.19	0.67	TRUE	ok	s	s->l	4	2	1	1	Firmicutes_A	Clostridia	Lachnospirales	Lachnospiraceae	Lachnospira	Lachnospira sp000437735
DBL_17	DBL	DBL_b17360_1	95.2	2440920	0	83.36	4.73	FALSE	none	s		0	0	0	0	Firmicutes_A	Clostridia	Lachnospirales	Lachnospiraceae	Dorea_A	Dorea_A longicatena
DBL_18	DBL	DBL_b8970	85.4	2010227	2	93.38	1.61	FALSE	ok	f		22	23	0	0	Actinobacteriota	Coriobacteriia	Coriobacteriales	Coriobacteriaceae	Collinsella	Collinsella sp900544465
DBL_19	DBL	DBL_b10980_1	83.6	3027817	2	83.19	2.27	FALSE	ok	s		3	2	0	0	Firmicutes_A	Clostridia	Lachnospirales	Lachnospiraceae	Blautia_A	Blautia_A sp000436615
DBL_20	DBL	DBL_b6911_1	78.6	2942567	3	88.44	0.84	FALSE	ok			2	2	0	0	Firmicutes_A	Clostridia	Lachnospirales	Lachnospiraceae	Anaerobutyricum	Anaerobutyricum hallii
DBL_21	DBL	DBL_b12536_1	75.9	2611975	4	87.65	3.35	FALSE	ok	s		6	2	0	0	Firmicutes_A	Clostridia	Lachnospirales	Lachnospiraceae	Oliverpabstia	Oliverpabstia intestinalis
DBL_22	DBL	DBL_b17843	73	3338896	0	95.29	3.26	FALSE	none	s		0	0	0	0	Firmicutes_A	Clostridia	Lachnospirales	Lachnospiraceae	Acetatifactor	Acetatifactor sp900066565
DBL_23	DBL	DBL_b3412_1	63.6	1784368	0	52.63	0	FALSE	none			0	0	0	0	Firmicutes_A	Clostridia	Lachnospirales	Lachnospiraceae	Blautia_A	Blautia_A massiliensis
DBL_24	DBL	DBL_b30663_1	62.5	2730400	2	83.47	7.97	FALSE	ok	s		38	3	0	0	Firmicutes_A	Clostridia	Lachnospirales	Lachnospiraceae	UMGS1375	UMGS1375 sp900066615
DBL_25	DBL	DBL_b6857_1	62.5	2581227	2	76.84	0.88	FALSE	ok	f		11	1	0	0	Firmicutes_A	Clostridia	Lachnospirales	Lachnospiraceae	Lachnospira	Lachnospira sp900316325
DBL_26	DBL	DBL_b18174	62.3	2544019	0	91.99	1.86	FALSE	too_many	i		0	0	0	0	Proteobacteria	Gammaproteobacteria	Burkholderiales	Burkholderiaceae	Sutterella	Sutterella wadsworthensis
DBL_27	DBL	DBL_b4376_1	59.8	2703747	2	86.59	1.68	FALSE	ok	s		23	2	2	2	Firmicutes_A	Clostridia	Lachnospirales	Lachnospiraceae	Mediterraneibacter	Mediterraneibacter faecis
DBL_28	DBL	DBL_b16570	59.4	1861798	0	82.81	4.72	FALSE	none	a		0	0	0	0	Firmicutes_A	Clostridia	Oscillospirales	Butyricicoccaceae	Agathobaculum	Agathobaculum sp003481705
DBL_29	DBL	DBL_b30437	50.3	1465856	2	86.09	2.2	FALSE	ok	s		2	1	0	0	Firmicutes	Bacilli	Lactobacillales	Streptococcaceae	Streptococcus	Streptococcus thermophilus
DBL_30	DBL	DBL_b9201_1	43.9	2614407	0	82.07	1.75	FALSE	none	s		0	0	0	0	Firmicutes_A	Clostridia	Lachnospirales	Lachnospiraceae	Lachnospira	Lachnospira eligens_A
DBL_31	DBL	DBL_b676_1	38.5	2717771	0	95.97	0	FALSE	none	a		0	0	0	0	Firmicutes_A	Clostridia	Oscillospirales	Ruminococcaceae	Ruminococcus_D	Ruminococcus_D bicirculans
DBL_32	DBL	DBL_b29404_1	38.4	2774561	0	95.75	1.34	FALSE	none	a		0	0	0	0	Firmicutes_A	Clostridia	UBA1381	UBA1381	CAG-41	CAG-41 sp900066215
DBL_33	DBL	DBL_b33885	37.3	3090984	0	90.44	2.32	FALSE	none	s		0	0	0	0	Actinobacteriota	Coriobacteriia	Coriobacteriales	Eggerthellaceae	Eggerthella	Eggerthella lenta
DBL_34	DBL	DBL_b24899	35.6	2182269	0	86.93	0.86	FALSE	none	a		0	0	0	0	Firmicutes_A	Clostridia	Oscillospirales	Butyricicoccaceae	Agathobaculum	Agathobaculum butyriciproducens
DBL_35	DBL	DBL_b14105_1	34.7	2628247	0	90.6	3.26	FALSE	none	s		0	0	0	0	Firmicutes_A	Clostridia	Lachnospirales	Lachnospiraceae	Clostridium_Q	Clostridium_Q fessum
DBL_36	DBL	DBL_b6031	32.7	4550633	0	83.09	0	FALSE	none	s		0	0	0	0	Bacteroidota	Bacteroidia	Bacteroidales	Tannerellaceae	Parabacteroides	Parabacteroides distasonis
DBL_37	DBL	DBL_b14082_1	32.6	2679543	2	89.82	4.68	FALSE	ok	s		4	1	0	0	Firmicutes_A	Clostridia	Lachnospirales	Lachnospiraceae	Dorea	Dorea formicigenerans
DBL_38	DBL	DBL_b16812	31.9	2932254	2	91.61	0.63	FALSE	ok			2	1	0	0	Firmicutes_A	Clostridia	Lachnospirales	Lachnospiraceae	Limivivens	Limivivens sp905214955
DBL_39	DBL	DBL_b3076_1	29.9	2669577	2	89.53	4.66	FALSE	ok	s		1	1	0	0	Firmicutes_A	Clostridia	Lachnospirales	Lachnospiraceae	Agathobacter	Agathobacter faecis
DBL_40	DBL	DBL_b5540_1	29.2	3321105	0	69.92	1.75	FALSE	none			0	0	0	0	Firmicutes_A	Clostridia	Lachnospirales	Lachnospiraceae	Enterocloster	Enterocloster sp000431375
DBL_41	DBL	DBL_b14292_1	28.4	2798303	0	90.59	3.52	FALSE	none	s		0	0	0	0	Firmicutes_A	Clostridia	Lachnospirales	Lachnospiraceae	Eubacterium_I	Eubacterium_I ramulus
DBL_42	DBL	DBL_b1235	27.9	2427362	0	72.58	0	FALSE	none	s		0	0	0	0	Firmicutes_A	Clostridia	Lachnospirales	Lachnospiraceae	Lachnospira	Lachnospira rogosae_A
DBL_43	DBL	DBL_b11288_1	24.4	3220302	0	90.11	2.42	FALSE	none	s		0	0	0	0	Firmicutes_A	Clostridia	Lachnospirales	Lachnospiraceae	Roseburia	Roseburia intestinalis
DBL_44	DBL	DBL_b3866	21.5	3491066	0	86.04	0.74	FALSE	none	s		0	0	0	0	Bacteroidota	Bacteroidia	Bacteroidales	Tannerellaceae	Parabacteroides	Parabacteroides merdae
DBL_45	DBL	DBL_b21639_1	19.6	2108494	0	98.8	0	FALSE	none	f		0	0	0	0	Firmicutes_C	Negativicutes	Acidaminococcales	Acidaminococcaceae	Acidaminococcus	Acidaminococcus intestini
DBL_46	DBL	DBL_b16157	19.5	2439050	0	87.56	1.74	FALSE	none			0	0	0	0	Firmicutes_A	Clostridia	Lachnospirales	Lachnospiraceae	Eisenbergiella	Eisenbergiella sp900066775
DBL_47	DBL	DBL_b42059_1	18.2	2237592	2	94.7	2.01	FALSE	ok	s		19	1	0	0	Firmicutes_A	Clostridia	Lachnospirales	Lachnospiraceae	Eubacterium_G	Eubacterium_G ventriosum
DBL_48	DBL	DBL_b19766	17.2	2098705	0	97.89	4.53	FALSE	none	s		0	0	0	0	Bacteroidota	Bacteroidia	Bacteroidales	Rikenellaceae	Alistipes	Alistipes putredinis
DBL_49	DBL	DBL_b23399	17.1	2164910	0	97.27	0	FALSE	none	a		0	0	0	0	Firmicutes_A	Clostridia	Oscillospirales	Acutalibacteraceae	UBA1417	UBA1417 sp003531055
DBL_50	DBL	DBL_b39691	15.9	2670513	0	79.27	9.3	FALSE	none	s		0	0	0	0	Firmicutes_A	Clostridia	Lachnospirales	Lachnospiraceae	Coprococcus_A	Coprococcus_A catus
DBL_51	DBL	DBL_b9408	15.9	2386680	0	87.29	3.61	FALSE	none	s		0	0	0	0	Firmicutes_A	Clostridia	Lachnospirales	Lachnospiraceae	RUG115	RUG115 sp900066395
DBL_52	DBL	DBL_b18028	15.6	2515513	0	63.93	0	FALSE	none			0	0	0	0	Firmicutes_A	Clostridia	Lachnospirales	Lachnospiraceae	Ruminococcus_B	Ruminococcus_B gnavus
DBL_53	DBL	DBL_b22490_1	15.6	1014527	0	57.49	0	FALSE	none	i		0	0	0	0	Firmicutes_C	Negativicutes	Acidaminococcales	Acidaminococcaceae	Phascolarctobacterium	Phascolarctobacterium faecium
DBL_54	DBL	DBL_b10651_1	15.4	2719979	0	51.23	0	FALSE	none	s		0	0	0	0	Firmicutes_A	Clostridia	Lachnospirales	Lachnospiraceae	Anaerobutyricum	Anaerobutyricum soehngenii
DBL_55	DBL	DBL_b18976	15.2	2431474	0	89.89	2.24	FALSE	none			0	0	0	0	Firmicutes_A	Clostridia	Oscillospirales	Oscillospiraceae	Lawsonibacter	Lawsonibacter asaccharolyticus
DBL_56	DBL	DBL_b2211_1	14.9	2597677	0	99.01	0.94	FALSE	none	s		0	0	0	0	Firmicutes	Bacilli	Erysipelotrichales	Coprobacillaceae	Faecalibacillus	Faecalibacillus intestinalis
DBL_57	DBL	DBL_b34173	13.9	2507374	0	87.18	1.35	FALSE	none			0	0	0	0	Firmicutes_A	Clostridia	Lachnospirales	Lachnospiraceae	Butyribacter	Butyribacter sp003529475
DBL_58	DBL	DBL_b16849	13.2	2512314	0	93.24	1.9	FALSE	none	s		0	0	0	0	Firmicutes_A	Clostridia	Lachnospirales	Lachnospiraceae	Eubacterium_G	Eubacterium_G sp000435815
DBL_59	DBL	DBL_b20884	13.1	1860066	0	56.62	0.88	FALSE	none			0	0	0	0	Firmicutes_A	Clostridia	Lachnospirales	Lachnospiraceae	Choladocola	Choladocola sp003480725
DBL_60	DBL	DBL_b13154	12.7	2431541	0	81.03	2.59	FALSE	none	t		0	0	0	0	Bacteroidota	Bacteroidia	Bacteroidales	Rikenellaceae	Alistipes	Alistipes shahii
DBL_61	DBL	DBL_b20033	12.5	3209424	0	65.79	3.51	FALSE	none	s		0	0	0	0	Firmicutes_A	Clostridia	Lachnospirales	Lachnospiraceae	Limivivens	Limivivens sp900543575
DBL_62	DBL	DBL_b2672_1	12.4	2231157	0	91.97	1.01	FALSE	none	s		0	0	0	0	Firmicutes_A	Clostridia	Lachnospirales	Lachnospiraceae	Eubacterium_F	Eubacterium_F sp000433735
DBL_63	DBL	DBL_b19796	11.9	1930442	0	75.92	1.03	FALSE	none	q		0	0	0	0	Firmicutes_A	Clostridia	Oscillospirales	Oscillospiraceae	Lawsonibacter	Lawsonibacter sp900066825
DBL_64	DBL	DBL_b32959	11.9	1811603	0	99.45	0.05	FALSE	none	s		0	0	0	0	Firmicutes	Bacilli	Lactobacillales	Lactobacillaceae	Limosilactobacillus	Limosilactobacillus reuteri
DBL_65	DBL	DBL_b33978	11.8	2513443	0	72.28	0	FALSE	none			0	0	0	0	Firmicutes_A	Clostridia	Lachnospirales	Lachnospiraceae	Enterocloster	Enterocloster sp001517625
DBL_66	DBL	DBL_b12176	10.3	2944608	0	97.31	0.2	FALSE	none	s		0	0	0	0	Bacteroidota	Bacteroidia	Bacteroidales	Barnesiellaceae	Barnesiella	Barnesiella intestinihominis
DBL_67	DBL	DBL_b19238	9.6	3084663	0	62.63	3.29	FALSE	none			0	0	0	0	Actinobacteriota	Coriobacteriia	Coriobacteriales	Eggerthellaceae	Gordonibacter	Gordonibacter pamelaeae
DBL_68	DBL	DBL_b8487	8.3	2246622	0	74.66	1.23	FALSE	none	s		0	0	0	0	Firmicutes_A	Clostridia	Christensenellales	CAG-74	Ventricola	Ventricola sp900542445
DBL_69	DBL	DBL_b29386	8.2	4009114	0	90.77	1.66	FALSE	none	s		0	0	0	0	Proteobacteria	Gammaproteobacteria	Enterobacterales	Enterobacteriaceae	Enterobacter	Enterobacter quasihormaechei
DBL_70	DBL	DBL_b4774	8.1	1514399	0	77.47	3.02	FALSE	none	s		0	0	0	0	Firmicutes_A	Clostridia	Oscillospirales	Oscillospiraceae	Evtepia	Evtepia gabavorous
DBL_71	DBL	DBL_b11069	7.9	1209036	0	60.92	2.39	FALSE	none	s		0	0	0	0	Proteobacteria	Gammaproteobacteria	Enterobacterales	Pasteurellaceae	Haemophilus_D	Haemophilus_D sp900764435
DBL_72	DBL	DBL_b16702_1	7.5	1274123	0	71.55	1.72	FALSE	none	i		0	0	0	0	Firmicutes_C	Negativicutes	Veillonellales	Dialisteraceae	Allisonella	Allisonella histaminiformans
DBL_73	DBL	DBL_b17762	7.1	3223701	0	82.87	2.36	FALSE	none	s		0	0	0	0	Firmicutes	Bacilli	Erysipelotrichales	Coprobacillaceae	Erysipelatoclostridium	Erysipelatoclostridium ramosum
DBL_74	DBL	DBL_b15644	6.5	1705050	2	58.28	1.72	FALSE	ok	s		1	1	0	0	Firmicutes_A	Clostridia	Peptostreptococcales	Peptostreptococcaceae	Romboutsia	Romboutsia timonensis
DBL_75	DBL	DBL_b13544	6.2	1280161	0	62.23	2.59	FALSE	none	a		0	0	0	0	Firmicutes_A	Clostridia	Oscillospirales	Acutalibacteraceae	Eubacterium_R	Eubacterium_R sp003526845
DBL_76	DBL	DBL_b33023	6	1932316	0	64.11	0.59	FALSE	none			0	0	0	0	Desulfobacterota_I	Desulfovibrionia	Desulfovibrionales	Desulfovibrionaceae	Bilophila	Bilophila wadsworthia
DBL_77	DBL	DBL_b27194	5.7	1433955	0	51.2	3.51	FALSE	none	s		0	0	0	0	Desulfobacterota_I	Desulfovibrionia	Desulfovibrionales	Desulfovibrionaceae	Desulfovibrio	Desulfovibrio sp900556755
DBV_1	DBV	DBV_b36239_1	424.3	4405720	4	91.93	0.09	TRUE	ok	s		17	10	0	0	Bacteroidota	Bacteroidia	Bacteroidales	Bacteroidaceae	Phocaeicola	Phocaeicola vulgatus
DBV_2	DBV	DBV_b29908	421.3	2190276	0	87.87	0.37	TRUE	none	l		0	0	0	0	Bacteroidota	Bacteroidia	Bacteroidales	Bacteroidaceae	Prevotella	Prevotella stercorea
DBV_3	DBV	DBV_b22274	275.5	1251224	0	60.4	0	TRUE	none			0	0	0	0	Firmicutes_A	Clostridia	Oscillospirales	Ruminococcaceae	Ruminococcus_C	Ruminococcus_C sp000433635
DBV_4	DBV	DBV_b29177_1	234.1	2050449	3	97.99	0.67	TRUE	ok	a		6	7	0	0	Firmicutes_A	Clostridia	Oscillospirales	Acutalibacteraceae	Ruminococcus_E	Ruminococcus_E bromii_B
DBV_5	DBV	DBV_b11728_1	165	2169985	4	81.28	2.57	TRUE	ok	s		30	26	0	0	Firmicutes_A	Clostridia	Lachnospirales	Lachnospiraceae	Fusicatenibacter	Fusicatenibacter saccharivorans
DBV_6	DBV	DBV_b14841_1	154.9	2438946	4	92.65	1.14	TRUE	ok	s		14	8	1	1	Firmicutes_A	Clostridia	Lachnospirales	Lachnospiraceae	Coprococcus	Coprococcus sp900066115
DBV_7	DBV	DBV_b22262	153.1	2559221	2	92.27	1.05	FALSE	ok			6	0	6	0	Firmicutes_A	Clostridia	Lachnospirales	Lachnospiraceae	Eubacterium_I	Eubacterium_I ramulus
DBV_8	DBV	DBV_b52982_1	151.2	2431415	3	76.63	4.39	FALSE	ok	l		12	11	0	0	Firmicutes_A	Clostridia	Lachnospirales	Lachnospiraceae	Lachnospira	Lachnospira sp003451515
DBV_9	DBV	DBV_b28592_1	134.3	2618018	2	95.95	0	TRUE	ok	a		5	1	0	0	Firmicutes_A	Clostridia	Oscillospirales	Ruminococcaceae	Ruminococcus_D	Ruminococcus_D bicirculans
DBV_10	DBV	DBV_b2991_1	129.9	2980699	0	89.91	3.41	TRUE	too_many	s		0	0	0	0	Firmicutes_A	Clostridia	Lachnospirales	Lachnospiraceae	Acetatifactor	Acetatifactor sp900066565
DBV_11	DBV	DBV_b3125	121	2705444	0	97.96	0	FALSE	none			0	0	0	0	Verrucomicrobiota	Verrucomicrobiae	Verrucomicrobiales	Akkermansiaceae	Akkermansia	Akkermansia muciniphila
DBV_12	DBV	DBV_b42263_1	116.5	6389893	0	83.1	1.72	FALSE	none	s		0	0	0	0	Bacteroidota	Bacteroidia	Bacteroidales	Bacteroidaceae	Bacteroides	Bacteroides cellulosilyticus
DBV_13	DBV	DBV_b12489_1	116.4	3042205	2	76.17	5.26	FALSE	ok	s		4	3	0	0	Firmicutes_A	Clostridia	Lachnospirales	Lachnospiraceae	Roseburia	Roseburia intestinalis
DBV_14	DBV	DBV_b38697_1	97.5	2645953	4	74.91	3.51	FALSE	ok	s		11	8	0	0	Firmicutes_A	Clostridia	Lachnospirales	Lachnospiraceae	Agathobacter	Agathobacter faecis
DBV_15	DBV	DBV_b1125	97.2	1856890	0	96.64	0.84	FALSE	none	v		0	0	0	0	Firmicutes_A	Clostridia	Oscillospirales	Acutalibacteraceae	CAG-217	CAG-217 sp000436335
DBV_16	DBV	DBV_b5323_1	95.2	3017885	2	92.19	1.01	FALSE	ok	s		1	1	0	0	Firmicutes_A	Clostridia	Lachnospirales	Lachnospiraceae	Blautia	Blautia stercoris
DBV_17	DBV	DBV_b17431_1	94.3	2634834	3	84.15	2.11	FALSE	ok	s		29	23	2	3	Firmicutes_A	Clostridia	Lachnospirales	Lachnospiraceae	Blautia_A	Blautia_A sp000436615
DBV_18	DBV	DBV_b55837_1	94.2	2660416	0	78.81	2.63	FALSE	none	s		0	0	0	0	Firmicutes_A	Clostridia	Lachnospirales	Lachnospiraceae	Agathobacter	Agathobacter rectalis
DBV_19	DBV	DBV_b24389_1	94.1	2845387	2	90.65	2.09	FALSE	ok	s		1	1	0	0	Firmicutes_A	Clostridia	Lachnospirales	Lachnospiraceae	Roseburia	Roseburia hominis
DBV_20	DBV	DBV_b44350	91.8	735457	2	54.05	0.28	TRUE	ok	f		15	7	0	0	Actinobacteriota	Coriobacteriia	Coriobacteriales	Coriobacteriaceae	Collinsella	Collinsella aerofaciens_M
DBV_21	DBV	DBV_b25629_1	91.5	1741836	2	81	4.74	TRUE	ok			31	17	0	0	Firmicutes_A	Clostridia	Oscillospirales	Oscillospiraceae	CAG-103	CAG-103 sp900543625
DBV_22	DBV	DBV_b12893_1	89.2	3151403	0	94.14	0.81	FALSE	none	s		0	0	0	0	Firmicutes_A	Clostridia	Lachnospirales	Lachnospiraceae	Butyribacter	Butyribacter intestini
DBV_23	DBV	DBV_b12744_1	84.9	2066993	2	54.7	0	FALSE	ok			10	7	0	0	Firmicutes_A	Clostridia	Lachnospirales	Lachnospiraceae	Anaerostipes	Anaerostipes hadrus
DBV_24	DBV	DBV_b9296_1	84.8	2390897	3	95.24	1.95	FALSE	ok	s		8	3	3	2	Firmicutes_A	Clostridia	Lachnospirales	Lachnospiraceae	Schaedlerella	Schaedlerella sp900066545
DBV_25	DBV	DBV_b43586_1	77.1	2745972	0	94.2	5.61	FALSE	none	a		0	0	0	0	Firmicutes_A	Clostridia	Oscillospirales	Ruminococcaceae	CAG-115	CAG-115 sp003531585
DBV_26	DBV	DBV_b26081_1	76.9	1995099	0	85.64	1.34	FALSE	none	a		0	0	0	0	Firmicutes_A	Clostridia	Oscillospirales	Butyricicoccaceae	Agathobaculum	Agathobaculum sp003481705
DBV_27	DBV	DBV_b12763_1	76	2790340	2	74.56	0.88	FALSE	ok	s		24	11	6	4	Firmicutes_A	Clostridia	Lachnospirales	Lachnospiraceae	Agathobacter	Agathobacter sp900552085
DBV_28	DBV	DBV_b1989_2	72.2	3215174	4	95.78	5.76	FALSE	ok	s		4	3	0	0	Firmicutes_A	Clostridia	Lachnospirales	Lachnospiraceae	Anaerobutyricum	Anaerobutyricum soehngenii
DBV_29	DBV	DBV_b21684_1	70.4	1906453	0	95.25	0.63	FALSE	none	i		0	0	0	0	Firmicutes_C	Negativicutes	Veillonellales	Dialisteraceae	Dialister	Dialister sp000434475
DBV_30	DBV	DBV_b6180_1	70.1	3172763	2	80.56	6.46	FALSE	ok	s		7	4	0	0	Firmicutes_A	Clostridia	Lachnospirales	Lachnospiraceae	KLE1615	KLE1615 sp900066985
DBV_31	DBV	DBV_b6982_1	68.8	1739122	2	50	3.51	FALSE	ok			1	1	0	0	Firmicutes_A	Clostridia	Lachnospirales	Lachnospiraceae	Anaerostipes	Anaerostipes hadrus_A
DBV_32	DBV	DBV_b8120_1	63.5	2297064	2	72.31	7.02	FALSE	ok	s		1	1	0	0	Firmicutes_A	Clostridia	Lachnospirales	Lachnospiraceae	Dorea_A	Dorea_A longicatena
DBV_33	DBV	DBV_b10416_1	63.4	2740409	0	88.35	2.53	FALSE	none	s		0	0	0	0	Firmicutes_A	Clostridia	Lachnospirales	Lachnospiraceae	Oliverpabstia	Oliverpabstia intestinalis
DBV_34	DBV	DBV_b31425	62.3	2197441	0	99.94	0.69	FALSE	none	s		0	0	0	0	Actinobacteriota	Actinomycetia	Actinomycetales	Bifidobacteriaceae	Bifidobacterium	Bifidobacterium longum
DBV_35	DBV	DBV_b12615	61.6	2730893	2	72.04	0	FALSE	ok	s	s->l	124	31	1	1	Firmicutes_A	Clostridia	Lachnospirales	Lachnospiraceae	Lachnospira	Lachnospira sp000436535
DBV_36	DBV	DBV_b16790_1	59	1430254	2	65.69	2.59	FALSE	ok			2	1	0	0	Firmicutes_A	Clostridia	Oscillospirales	Oscillospiraceae	CAG-83	CAG-83 sp000435555
DBV_37	DBV	DBV_b1372_1	57.5	2595913	2	51.75	2.63	FALSE	ok	s		7	2	0	0	Firmicutes_A	Clostridia	Lachnospirales	Lachnospiraceae	Blautia_A	Blautia_A sp003471165
DBV_38	DBV	DBV_b46080_1	53	2961001	0	92.91	0.32	FALSE	none	s		0	0	0	0	Firmicutes_A	Clostridia	Lachnospirales	Lachnospiraceae	Marvinbryantia	Marvinbryantia sp014385005
DBV_39	DBV	DBV_b8309_1	53	2842854	2	97.21	5.43	FALSE	ok	s		5	1	0	0	Firmicutes_A	Clostridia	Lachnospirales	Lachnospiraceae	Eubacterium_F	Eubacterium_F sp003491505
DBV_40	DBV	DBV_b52958	50.5	2302563	0	96.1	0.38	FALSE	none	l		0	0	0	0	Bacteroidota	Bacteroidia	Bacteroidales	Muribaculaceae	CAG-873	CAG-873 sp001701165
DBV_41	DBV	DBV_b30540	48.6	1727655	2	85.11	1.34	FALSE	ok	a		22	3	4	2	Firmicutes_A	Clostridia	Oscillospirales	Oscillospiraceae	ER4	ER4 sp000765235
DBV_42	DBV	DBV_b55984	47.7	2123401	0	96.67	3.69	FALSE	none	a		0	0	0	0	Firmicutes_A	Clostridia	Oscillospirales	Acutalibacteraceae	UBA1417	UBA1417 sp003531055
DBV_43	DBV	DBV_b31810_1	45.9	1876381	0	74.25	9.48	FALSE	none			0	0	0	0	Firmicutes_A	Clostridia	Oscillospirales	Oscillospiraceae	CAG-83	CAG-83 sp001916855
DBV_44	DBV	DBV_b33369_1	44.2	2153145	2	90.25	1.5	FALSE	ok	a		8	3	0	0	Firmicutes_A	Clostridia	Oscillospirales	Ruminococcaceae	Gemmiger	Gemmiger qucibialis
DBV_45	DBV	DBV_b15424	41.8	2765533	0	98.8	4.29	FALSE	none	l		0	0	0	0	Bacteroidota	Bacteroidia	Bacteroidales	Rikenellaceae	Alistipes	Alistipes communis
DBV_46	DBV	DBV_b6337	40.6	2407421	0	90.69	0.02	FALSE	none	a		0	0	0	0	Firmicutes_A	Clostridia	Oscillospirales	Ruminococcaceae	Ruminiclostridium_E	Ruminiclostridium_E sp003512525
DBV_47	DBV	DBV_b14158_1	40.5	2139241	2	92.07	2.98	FALSE	ok	s		3	1	0	0	Firmicutes_A	Clostridia	Lachnospirales	Lachnospiraceae	UBA11774	UBA11774 sp003507655
DBV_48	DBV	DBV_b6055_1	39.7	3234506	2	65.58	1.75	FALSE	ok			35	10	0	0	Firmicutes_A	Clostridia	Lachnospirales	Lachnospiraceae	Blautia_A	Blautia_A sp900066145
DBV_49	DBV	DBV_b5493	38.2	2793027	0	95.1	0.36	FALSE	none	s		0	0	0	0	Firmicutes_A	Clostridia	Lachnospirales	Lachnospiraceae	CAG-882	CAG-882 sp000435595
DBV_50	DBV	DBV_b45	36.4	2275370	0	99.04	0.67	FALSE	none	s		0	0	0	0	Bacteroidota	Bacteroidia	Bacteroidales	Rikenellaceae	Tidjanibacter	Tidjanibacter inops_A
DBV_51	DBV	DBV_b18169_1	35.8	2629997	0	91.56	0.34	FALSE	none	s		0	0	0	0	Firmicutes_A	Clostridia	Lachnospirales	Lachnospiraceae	Butyribacter	Butyribacter sp003524945
DBV_52	DBV	DBV_b21320_2	34.9	4020078	0	75.16	0	FALSE	none			0	0	0	0	Bacteroidota	Bacteroidia	Bacteroidales	Bacteroidaceae	Bacteroides	Bacteroides uniformis
DBV_53	DBV	DBV_b21047_1	33.4	1393378	0	64.55	1.21	FALSE	none	f		0	0	0	0	Actinobacteriota	Coriobacteriia	Coriobacteriales	Eggerthellaceae	CAG-1427	CAG-1427 sp000436075
DBV_54	DBV	DBV_b26682_1	30	2853833	0	88.35	3.16	FALSE	none	s		0	0	0	0	Firmicutes_A	Clostridia	Lachnospirales	Lachnospiraceae	Ventrimonas	Ventrimonas sp900770535
DBV_55	DBV	DBV_b29407	29.3	2616652	2	57.92	4.39	FALSE	ok			1	1	0	0	Firmicutes_A	Clostridia	Lachnospirales	Lachnospiraceae	Blautia_A	Blautia_A sp900066205
DBV_56	DBV	DBV_b8490_1	29	1998777	0	72.57	2.59	FALSE	none	s		0	0	0	0	Firmicutes_A	Clostridia	Lachnospirales	Lachnospiraceae	Mediterraneibacter	Mediterraneibacter lactaris
DBV_57	DBV	DBV_b21187_1	28.8	2364083	0	79.06	2.63	FALSE	none	s		0	0	0	0	Firmicutes_A	Clostridia	Lachnospirales	Lachnospiraceae	Lachnospira	Lachnospira sp900316325
DBV_58	DBV	DBV_b19665_1	28.7	2362888	0	78.77	1.46	FALSE	none	y		0	0	0	0	Firmicutes	Bacilli	Erysipelotrichales	Coprobacillaceae	Faecalibacillus	Faecalibacillus intestinalis
DBV_59	DBV	DBV_b27483_1	28.5	1834697	0	53.2	0	FALSE	none	a		0	0	0	0	Firmicutes_A	Clostridia	Oscillospirales	Ruminococcaceae	Gemmiger	Gemmiger sp900539695
DBV_60	DBV	DBV_b11459_1	27.1	1323704	0	70.04	2.91	FALSE	none			0	0	0	0	Firmicutes_A	Clostridia	Oscillospirales	Oscillospiraceae	ER4	ER4 sp900317525
DBV_61	DBV	DBV_b22953_1	27.1	2492485	2	94.21	4.38	FALSE	ok	a		3	2	0	0	Firmicutes_A	Clostridia	Oscillospirales	Oscillospiraceae	Faecousia	Faecousia sp900540635
DBV_62	DBV	DBV_b36260_1	25.4	1831339	0	85.96	0.86	FALSE	none	a		0	0	0	0	Firmicutes_A	Clostridia	Oscillospirales	Ruminococcaceae	Angelakisella	Angelakisella sp900547385
DBV_63	DBV	DBV_b37239_1	25.1	2568753	0	94.06	0.9	FALSE	none	s		0	0	0	0	Firmicutes_A	Clostridia	Lachnospirales	Lachnospiraceae	Butyribacter	Butyribacter sp003529475
DBV_64	DBV	DBV_b30465	22.1	2914476	0	94.09	1.68	FALSE	none	l		0	0	0	0	Bacteroidota	Bacteroidia	Bacteroidales	Rikenellaceae	Alistipes	Alistipes onderdonkii
DBV_65	DBV	DBV_b36629_1	20.8	2992653	0	96.95	1.51	FALSE	none	a		0	0	0	0	Firmicutes_A	Clostridia	UBA1381	UBA1381	CAG-41	CAG-41 sp900066215
DBV_66	DBV	DBV_b16281	20.4	2188181	0	96.48	1.65	FALSE	none			0	0	0	0	Actinobacteriota	Coriobacteriia	Coriobacteriales	Eggerthellaceae	Ellagibacter	Ellagibacter isourolithinifaciens
DBV_67	DBV	DBV_b2069	19.6	1825329	0	95.92	1.7	FALSE	none	a		0	0	0	0	Firmicutes_A	Clostridia	Oscillospirales	Acutalibacteraceae	Eubacterium_R	Eubacterium_R sp003526845
DBV_68	DBV	DBV_b5721_1	19.5	4574390	0	51.83	5.17	FALSE	none			0	0	0	0	Bacteroidota	Bacteroidia	Bacteroidales	Bacteroidaceae	Bacteroides	Bacteroides caccae
DBV_69	DBV	DBV_b3589_1	18.8	1690428	0	54.39	0	FALSE	none			0	0	0	0	Firmicutes	Bacilli	Erysipelotrichales	Coprobacillaceae	Faecalibacillus	Faecalibacillus faecis
DBV_70	DBV	DBV_b31804_1	18.2	1787694	0	69.57	1.55	FALSE	none	a		0	0	0	0	Firmicutes_A	Clostridia	Oscillospirales	Oscillospiraceae	Evtepia	Evtepia sp004556345
DBV_71	DBV	DBV_b22175_1	17.5	2429738	0	72.76	5.26	FALSE	none	s		0	0	0	0	Firmicutes_A	Clostridia	Lachnospirales	Lachnospiraceae	UMGS1375	UMGS1375 sp900066615
DBV_72	DBV	DBV_b13743	15.5	3160382	0	68.74	0	FALSE	none	s		0	0	0	0	Firmicutes_A	Clostridia	Lachnospirales	Lachnospiraceae	Limivivens	Limivivens sp900543575
DBV_73	DBV	DBV_b6761	14.5	1976452	0	96.37	1.85	FALSE	none	a		0	0	0	0	Firmicutes_A	Clostridia	Oscillospirales	Acutalibacteraceae	Ruminococcus_E	Ruminococcus_E sp900314705
DBV_74	DBV	DBV_b12215	12.6	1781682	0	51.38	6.9	FALSE	none			0	0	0	0	Firmicutes_A	Clostridia	Oscillospirales	Oscillospiraceae	Lawsonibacter	Lawsonibacter sp900549405
DBV_75	DBV	DBV_b27148	12.5	1903721	0	89.88	3.74	FALSE	none			0	0	0	0	Actinobacteriota	Coriobacteriia	Coriobacteriales	Eggerthellaceae	Senegalimassilia	Senegalimassilia anaerobia
DBV_76	DBV	DBV_b24505_1	12.4	2180863	0	57.6	0	FALSE	none			0	0	0	0	Firmicutes_A	Clostridia	Lachnospirales	Lachnospiraceae	Merdisoma	Merdisoma sp900553635
DBV_77	DBV	DBV_b19749_1	12.3	2438247	0	63.48	1.75	FALSE	none			0	0	0	0	Firmicutes_A	Clostridia	Lachnospirales	Lachnospiraceae	Eisenbergiella	Eisenbergiella sp900066775
DBV_78	DBV	DBV_b12452	12.2	1518379	0	56.9	3.45	FALSE	none			0	0	0	0	Firmicutes_A	Clostridia	Oscillospirales	Oscillospiraceae	Dysosmobacter	Dysosmobacter sp900542115
DBV_79	DBV	DBV_b14663	11.4	1866587	0	70.64	1.29	FALSE	none			0	0	0	0	Firmicutes_A	Clostridia	Oscillospirales	Oscillospiraceae	UBA738	UBA738 sp003522945
DBV_80	DBV	DBV_b12277_1	11.3	2159389	0	82.12	1.34	FALSE	none	a		0	0	0	0	Firmicutes_A	Clostridia	Oscillospirales	CAG-272	CAG-390	CAG-390 sp900753295
[truncated: 3,666 more rows]
