# Supplementary material for: A short course of antibiotics selects for persistent resistance in the human gut
Source: Research Square preprint supplement (doi:10.21203/rs.3.rs-3399159/v1), 2023-10-13
Supplement: Supplementary file 3 [file 3563649ef087cf9a16291997.xlsx]

## Sheet: features
feature	description	putative_mechanism	pvalue	qvalue	enrichment	weight.obs	count.obs	weight.exp	count.exp	high.count	equal.count	low.count	weight	variant.count	vc.count	bin.count	assemblies.count	median.vc.size	genic.fraction	Ns	Nn	Ks	Kn	q25.bin.length	q50.bin.length	q75.bin.length	median.bin.xcov	median.eggNOG.evalue	median.eggNOG.score	top.max_annot_lvl	top.COG.catetory	top.KEGG_ko	top.KEGG_Pathway	top.Preferred_name	top.PFAMs	DnDs
K02469	gyrA; DNA gyrase subunit A	ciprofloxacin target	6e-06	0.001356	359.59	37.7658	72	0.105024	2363	1999988	0	12	37.8	72	67	67	37	2	1	6	66	104945	429142	2.0976e+06	2.37908e+06	2.92617e+06	188	0	1209.5	976|Bacteroidetes	L	ko:K02469	-	gyrA	DNA_gyraseA_C,DNA_topoisoIV	2.69001
K06400	spoIVCA; site-specific DNA recombinase		2.3e-05	0.002599	122.6	1.64923	4	0.013452	335	999977	0	23	1.6	4	4	3	3	25	1	3	1	2986	12530	2.70116e+06	2795814	2844281	66.8	3.89e-283	782	186801|Clostridia	L	ko:K06400	-	-	Recombinase,Resolvase,Zn_ribbon_recom	0.079436
K19505	gfrR; transcriptional regulator		0.004133	0.260169	33.51	0.0710784	3	0.0021212	137	995867	0	4133	0.1	3	3	3	3	31	1	1	1	4163	17347	2091847	2138730	2.51263e+06	132.3	7.05e-229	678	2|Bacteria	K	ko:K03974,ko:K19505	-	pspF	EIIA-man,Fer4_5,HTH_8,PRD,Sigma54_activ_2,Sigma54_activat,cNMP_binding	0.239984
K01104	E3.1.3.48; protein-tyrosine phosphatase		0.006728	0.260169	10.22	1.21605	5	0.118936	2038	993272	0	6728	1.2	5	3	3	3	35	0.8	3	1	1362	5613	2308080	2308080	2308080	51.8	1.63e-72	222	186801|Clostridia	T	ko:K01104	-	ptpA	LMWPc	0.0808837
K02621	parC; Topoisomerase IV subunit A	ciprofloxacin target	0.0086515	0.260169	21.34	2.16667	5	0.101542	2382	1982697	5402	11901	2.2	5	4	4	4	2	1	0	5	6058	25037	2262092	2290657	2550368	137.1	0	1255	186801|Clostridia	L	ko:K02621	-	-	DNA_gyraseA_C,DNA_topoisoIV	Inf
K01537	ATP2C; P-type Ca2+ transporter type 2C		0.0106345	0.260169	17.95	1.42067	8	0.0791287	1800	1978731	0	21269	1.4	8	4	4	3	8	1	5	3	9657	39213	2.38193e+06	2474143	2.60303e+06	69.8	9.15e-224	714.5	186801|Clostridia	P	ko:K01537	-	-	Cation_ATPase,Cation_ATPase_C,Cation_ATPase_N,E1-E2_ATPase,Hydrolase	0.147762
K01487	guaD, GDA; guanine deaminase		0.013144	0.260169	14.65	0.147488	8	0.0100656	648	986856	0	13144	0.1	8	3	3	3	194	0.875	3	4	5938	24851	3152044	3152044	3152044	490.3	4.83e-199	562	186801|Clostridia	F	ko:K01487	ko00230,ko01100,map00230,map01100	guaD	Amidohydro_1	0.318592
K11085	msbA; ATP-binding cassette, subfamily B		0.016762	0.260169	10.05	0.518331	3	0.0516007	1825	983238	0	16762	0.5	3	3	3	3	59	1	3	0	2634	11154	1.91133e+06	2226707	2376633	122	2.93e-276	772	186801|Clostridia	V	ko:K06147,ko:K11085	ko02010,map02010	-	ABC_membrane,ABC_tran	0
K03531	ftsZ; cell division protein FtsZ		0.017758	0.260169	13.7	1.50398	3	0.109742	2318	1964484	6745	28771	1.5	3	3	3	3	2	1	2	1	2568	9411	2.91141e+06	3177453	3.77605e+06	72	7.06e-205	574	186801|Clostridia	D	ko:K03531	ko04112,map04112	ftsZ	FtsZ_C,Tubulin	0.136436
K01813	rhaA; L-rhamnose isomerase		0.019865	0.260169	10.73	0.300765	8	0.0280325	991	1960270	0	39730	0.3	8	5	4	4	271	0.75	5	1	5871	24540	4374654	4374654	4.41651e+06	125.9	5.96e-264	728	976|Bacteroidetes	G	ko:K01813	ko00051,ko01120,map00051,map01120	rhaA	RhaA	0.0478484
K03657	uvrD, pcrA; ATP-dependent DNA helicase UvrD/PcrA		0.0202175	0.260169	7.76	1.70292	7	0.219394	5528	1959565	0	40435	1.7	7	7	7	7	37	0.857	2	4	10490	41053	1938245	2541886	3.18995e+06	75	0	1278	186801|Clostridia	L	ko:K03657	ko03420,ko03430,map03420,map03430	-	UvrD-helicase,UvrD_C	0.511047
K01197	hya; hyaluronoglucosaminidase		0.021153	0.260169	57.86	1.06614	4	0.0184256	475	1957694	3276	39030	1.1	4	3	3	3	57.5	1	1	3	11216	46069	2000579	2.26839e+06	3.12666e+06	76.1	0	2371	186801|Clostridia	G	ko:K01197	ko00531,ko01100,map00531,map01100	-	F5_F8_type_C,FIVAR,Glyco_hydro_20b,NAGidase	0.730383
K02438	glgX; glycogen debranching enzyme		0.0223175	0.260169	20.04	0.0568114	6	0.00283546	502	1955365	20041	24594	0.1	6	3	3	3	412	1	3	3	6970	28562	4374654	4374654	4374654	125.9	0	1114	135625|Pasteurellales	G	ko:K02438	ko00500,ko01100,map00500,map01100	glgX	Alpha-amylase,CBM_48	0.244031
K19353	eptC; heptose-I-phosphate ethanolaminephosphotransferase		0.022603	0.260169	5.15	0.0819004	6	0.015894	2013	1954794	420	44786	0.1	6	3	3	3	274.5	0.833	3	2	5991	24645	3.21024e+06	4458371	4542088	94	0	1135	1236|Gammaproteobacteria	S	ko:K19353	ko00540,map00540	-	DUF1705,Sulfatase	0.162061
K13010	per, rfbE; perosamine synthetase		0.0232085	0.260169	22.63	0.632258	3	0.0279445	467	1953583	1999	44418	0.6	3	3	3	3	12	1	2	0	1827	7767	2.44098e+06	2541886	3.27098e+06	75	2.45e-160	462	186801|Clostridia	M	ko:K13010	ko00520,map00520	spsC	DegT_DnrJ_EryC1	0
K00965	galT; transferase		0.023856	0.260169	11.06	0.515278	6	0.0465884	1272	976144	0	23856	0.5	6	3	3	3	128	1	5	1	4846	19292	1877137	1877137	2.36649e+06	137.9	3.69e-111	350	201174|Actinobacteria	H	ko:K00849,ko:K00965	ko00052,ko00520,ko01100,ko04917,map00052,map00520,map01100,map04917	galK	GHMP_kinases_C,GHMP_kinases_N,GalKase_gal_bdg	0.0502384
K12527	ygfK; putative selenate reductase		0.026424	0.260169	49.61	1.05808	9	0.021328	1104	1947152	1253	51595	1.1	9	3	3	3	7	1	4	5	13123	53306	1705366	1705366	1705366	60.1	0	1237	186801|Clostridia	CE	ko:K12527	ko00450,map00450	-	Fer4_20,Pyr_redox_2,Pyr_redox_3	0.307728
K07496	insQ; putative transposase		0.0311625	0.260169	31.32	1.05148	3	0.0335746	1309	1937675	1024	61301	1.1	3	3	3	3	59	0.667	1	1	1673	7444	2333739	2440771	2.45645e+06	105.5	2.1e-150	438	186801|Clostridia	L	ko:K07496	-	-	OrfB_IS605,OrfB_Zn_ribbon	0.224745
K01436	yhaA; amidohydrolase		0.031781	0.260169	7.55	0.135209	4	0.0179022	314	968219	0	31781	0.1	4	3	3	3	38	1	4	0	2924	10657	1.73031e+06	1773003	1.92641e+06	52.9	2.93e-170	486	186801|Clostridia	E	ko:K01436	-	-	M20_dimer,Peptidase_M20	0
K09749	uncharacterized protein		0.037457	0.260169	6.39	0.172044	5	0.0269279	498	1925086	15631	59283	0.2	5	4	4	4	90	1	1	4	4182	17409	2497259	2497259	2529608	91.5	8.02e-180	518	186801|Clostridia	L	ko:K09749	-	-	FapA,Jag_N	0.960882
K02051	ABC.SN.S; ABC transporter		0.038169	0.260169	10.28	1.05556	11	0.102649	2176	1923662	5931	70407	1.1	11	3	3	3	8	0.909	6	4	4827	20103	2598532	2598532	5317421	52.1	1.13e-136	401	186801|Clostridia	P	ko:K02051	-	-	NMT1,NMT1_2	0.160076
K02314	dnaB; replicative DNA helicase		0.038247	0.260169	11.18	0.957143	4	0.0855975	1600	961753	0	38247	1	4	4	4	4	11.5	0.75	3	0	3308	13612	1943685	2.16308e+06	2.65521e+06	110.6	3.06e-222	753	186801|Clostridia	L	ko:K02314	ko03030,ko04112,map03030,map04112	dnaB	DnaB,DnaB_C	0
K01119	cpdB; 2',3'-cyclic-nucleotide 2'-phosphodiesterase / 3'-nucleotidase		0.0389275	0.260169	3.43	0.122131	6	0.0356213	1784	1922145	872	76983	0.1	6	3	3	3	85	0.833	2	3	5401	23219	3381752	3381752	3.4377e+06	436.2	1.44e-228	645	186801|Clostridia	F	ko:K01119	ko00230,ko00240,map00230,map00240	-	5_nucleotid_C,Metallophos	0.348917
K02115	ATPF1G, atpG; F-type H+-transporting ATPase subunit gamma		0.041139	0.260169	7.2	0.519018	3	0.0720672	1395	958861	0	41139	0.5	3	3	3	3	90	1	2	1	1567	6560	2.27361e+06	2308080	2354235	51.8	4.38e-178	500	186801|Clostridia	C	ko:K02115	ko00190,ko00195,ko01100,map00190,map00195,map01100	atpG	ATP-synt	0.119436
K03427	hsdM; type I restriction enzyme M protein	methylation of gyrA	0.0411875	0.260169	9.98	0.69513	10	0.0696332	1686	1917625	731	81644	0.7	10	5	5	4	41	1	7	3	8927	39124	2806420	4240940	4240940	761.3	2.08e-294	815	976|Bacteroidetes	V	ko:K03427	-	hsdM	HsdM_N,N6_Mtase	0.097788
K08218	ampG; MFS transporter		0.0412985	0.260169	4.08	0.107902	8	0.0264751	1058	1917403	768	81829	0.1	8	4	4	4	89	1	5	3	6899	26365	2929739	2929739	4.35868e+06	119.3	3.615e-224	731.5	976|Bacteroidetes	EGP	ko:K08218	ko01501,map01501	ampG	MFS_1	0.157004
K01531	mgtA, mgtB; P-type Mg2+ transporter		0.0416535	0.260169	3.75	0.0602837	10	0.0160879	966	1916693	215	83092	0.1	10	3	3	3	278	0.6	5	1	15409	65501	4.35868e+06	4458371	4542088	62.1	0	1832	28216|Betaproteobacteria	P	ko:K01531	-	mgtA	Cation_ATPase_C,Cation_ATPase_N,E1-E2_ATPase,Hydrolase	0.0470497
K03604	purR; LacI family transcriptional regulator		0.0417905	0.260169	4.09	0.0847434	6	0.0206977	1474	1916419	903	82678	0.1	6	4	4	4	94.5	0.5	2	1	3616	14681	2.76609e+06	3320416	4.11109e+06	141.35	5.4e-157	450	1236|Gammaproteobacteria	K	ko:K02529,ko:K03604	-	-	LacI,Peripla_BP_3	0.123152
K01421	yhgE; putative membrane protein		0.041837	0.260169	6.68	0.577349	18	0.0864006	1696	958163	0	41837	0.6	18	4	4	4	101	0.778	8	6	39916	146312	2626623	2626623	2626623	228.1	1.33e-109	379	186801|Clostridia	S	ko:K01421	-	-	ABC2_membrane_3,DUF3533	0.204611
K17318	lplA; putative aldouronate transport system substrate-binding protein		0.0440195	0.260169	10.11	1.10885	13	0.109711	1929	1911961	0	88039	1.1	13	5	5	5	194	1	6	7	11518	51014	2456396	3152044	3152044	490.3	0	955	186801|Clostridia	G	ko:K17318	ko02010,map02010	-	SBP_bac_1,SBP_bac_8	0.263411
K01873	VARS, valS; valyl-tRNA synthetase		0.048416	0.260169	6.99	0.885897	3	0.126772	2587	1903168	3024	93808	0.9	3	3	3	3	8	0.333	1	0	3358	14831	3.55052e+06	3808888	4106677	69.5	0	1165	186801|Clostridia	J	ko:K01873	ko00970,map00970	valS	Anticodon_1,Val_tRNA-synt_C,tRNA-synt_1	0
K22278	pgdA; peptidoglycan-N-acetylglucosamine deacetylase		0.04846	0.260169	7.95	0.44632	6	0.0561073	1507	1903080	2278	94642	0.4	6	4	4	4	44	1	5	0	4034	16306	2386650	2.55316e+06	2719673	129.1	1.835e-173	525	186801|Clostridia	G	ko:K22278	-	-	Big_2,CW_binding_1,Cu_amine_oxidN1,Polysacc_deac_1,SH3_3	0
