# Supplementary material for: A short course of antibiotics selects for persistent resistance in the human gut
Source: Research Square preprint supplement (doi:10.21203/rs.3.rs-3399159/v1), 2023-10-13
Supplement: Supplementary file 4 [file ed032269500825d988b6e66d.xlsx]

## Sheet: vars_final
index	gid	xid	aid	contig	coord	variant	edge_size	response	K02469_83	gene_1	orient_1	uniref_1	identity_1	prot_desc_1	start_dist_1	mut_class_1	mut_label_1	KEGG_ko_1	PFAMs_1	gene_2	orient_2	uniref_2	identity_2	prot_desc_2	start_dist_2	mut_class_2	mut_label_2	KEGG_ko_2	PFAMs_2
1	AAK_1	AAK_1_1	AAK	k77_91792	43053	sub_G	31	no_sweep	46	AAK_g56554_38	in	UniRef100_A0A174AUY3	100	DNA topoisomerase (ATP-hydrolyzing)	275	non_syn	Li->L	ko:K02621	DNA_topoisoIV	-	-	-	-	-	-	-	-
1	AAK_1	AAK_1_2	AAK	k77_91792	43065	sub_C	31	no_sweep	42	AAK_g56554_38	in	UniRef100_A0A174AUY3	100	DNA topoisomerase (ATP-hydrolyzing)	263	syn	Q->Q	ko:K02621	DNA_topoisoIV	-	-	-	-	-	-	-	-
1	AAK_1	AAK_1_3	AAK	k77_91792	43077	sub_C	31	no_sweep	38	AAK_g56554_38	in	UniRef100_A0A174AUY3	100	DNA topoisomerase (ATP-hydrolyzing)	251	non_syn	L->Li	ko:K02621	DNA_topoisoIV	-	-	-	-	-	-	-	-
1	AAK_1	AAK_1_4	AAK	k77_207907	10240	sub_A	31	no_sweep	0	AAK_g31661_10	in	UniRef100_A0A4Y1X9J0	100	ABC transporter permease	500	syn	G->G	ko:K02066	MlaE	-	-	-	-	-	-	-	-
1	AAK_1	AAK_1_5	AAK	k77_210816	139821	sub_G	31	no_sweep	0	AAK_g70661_106	in	UniRef100_R6Y9C4	100	Elongation factor 4	1505	syn	T->T	ko:K03596	EFG_C,GTP_EFTU,GTP_EFTU_D2,LepA_C	-	-	-	-	-	-	-	-
1	AAK_1	AAK_1_6	AAK	k77_268646	43351	sub_G	31	no_sweep	0	AAK_g14149_26	in	UniRef100_A0A175AEZ0	100	Ketol-acid reductoisomerase (NADP(+))	545	syn	E->E	ko:K00053	IlvC,IlvN	-	-	-	-	-	-	-	-
1	AAK_1	AAK_1_7	AAK	k77_327377	2995	sub_A	31	no_sweep	0	AAK_g41654_3	upstream	UniRef100_R6XXJ5	100	Probable transcriptional regulatory protein BN590_00899	-51	undefined	undefined	-	Transcrip_reg	AAK_g41654_4	upstream	UniRef100_R6Y4V4	100	Lactoylglutathione lyase-like lyase	-101	undefined	undefined	ko:K01759	Glyoxalase
1	AAK_1	AAK_1_8	AAK	k77_91792	15638	sub_C	31	no_sweep	0	AAK_g56554_17	in	UniRef100_R6Z6E0	100	Acyl-CoA dehydrogenase C-terminal domain protein	45	non_syn	Q->E	-	Acyl-CoA_dh_1,Acyl-CoA_dh_M,Acyl-CoA_dh_N,AcylCoA_dehyd_C	-	-	-	-	-	-	-	-
1	AAK_1	AAK_1_9	AAK	k77_109215	29730	sub_G	31	no_sweep	0	AAK_g21417_20	in	UniRef100_A0A173WND1	100	Neutral endopeptidase	1305	non_syn	K->E	ko:K01415,ko:K07386	Peptidase_M13,Peptidase_M13_N	-	-	-	-	-	-	-	-
1	AAK_1	AAK_1_10	AAK	k77_112616	65853	sub_G	31	no_sweep	0	AAK_g68855_49	in	UniRef100_UPI00129E44DC	100	two-component sensor histidine kinase	1340	syn	D->D	-	HATPase_c,HisKA	-	-	-	-	-	-	-	-
1	AAK_1	AAK_1_11	AAK	k77_112616	115512	sub_C	31	no_sweep	0	AAK_g68855_83	in	UniRef100_A0A174CTB3	100	Uncharacterized protein	431	non_syn	C->W	-	-	-	-	-	-	-	-	-	-
1	AAK_1	AAK_1_12	AAK	k77_121810	162223	sub_G	31	no_sweep	0	AAK_g53268_132	in	UniRef100_UPI00129DE384	100	oligopeptide transporter, OPT family	102	syn	R->R	-	OPT	-	-	-	-	-	-	-	-
1	AAK_1	AAK_1_13	AAK	k77_124890	132230	sub_A	31	no_sweep	0	-	-	-	-	-	-	-	-			-	-	-	-	-	-	-	-
1	AAK_1	AAK_1_14	AAK	k77_124890	132695	sub_A	31	no_sweep	0	-	-	-	-	-	-	-	-			-	-	-	-	-	-	-	-
1	AAK_1	AAK_1_15	AAK	k77_124890	161385	sub_T	31	no_sweep	0	AAK_g24409_135	in	UniRef100_A0A4Y1X6S0	100	Lipid A biosynthesis acyltransferase	335	syn	R->R	-	Lip_A_acyltrans	-	-	-	-	-	-	-	-
1	AAK_1	AAK_1_16	AAK	k77_143511	10344	sub_G	31	no_sweep	0	-	-	-	-	-	-	-	-			-	-	-	-	-	-	-	-
1	AAK_1	AAK_1_17	AAK	k77_171878	56524	sub_C	31	no_sweep	0	-	-	-	-	-	-	-	-			-	-	-	-	-	-	-	-
1	AAK_1	AAK_1_18	AAK	k77_210816	12252	sub_C	31	no_sweep	0	AAK_g70661_8	in	UniRef100_R6XSS0	100	Aminotransferase	299	non_syn	N->K	ko:K10206,ko:K14261	Aminotran_1_2	-	-	-	-	-	-	-	-
1	AAK_1	AAK_1_19	AAK	k77_210816	26206	sub_C	31	no_sweep	0	-	-	-	-	-	-	-	-			-	-	-	-	-	-	-	-
1	AAK_1	AAK_1_20	AAK	k77_27342	50115	sub_T	31	no_sweep	0	AAK_g25367_35	in	UniRef100_A0A4Y1XB56	100	Multidrug transporter AcrB	1232	syn	H->H	ko:K03296	ACR_tran	-	-	-	-	-	-	-	-
1	AAK_1	AAK_1_21	AAK	k77_27342	106113	sub_C	31	no_sweep	0	AAK_g25367_93	in	UniRef100_A0A4Y1WMU2	99.8	Alpha-amylase	887	syn	Y->Y	-	Alpha-amylase,Alpha-amylase_C,Malt_amylase_C	-	-	-	-	-	-	-	-
1	AAK_1	AAK_1_22	AAK	k77_31670	14638	sub_C	31	no_sweep	0	AAK_g12081_16	in	UniRef100_A0A174GEF7	100	Methylmalonyl-CoA carboxyltransferase 12S subunit	1037	syn	R->R	ko:K01966	Carboxyl_trans	-	-	-	-	-	-	-	-
1	AAK_1	AAK_1_23	AAK	k77_54500	58650	sub_T	31	no_sweep	0	AAK_g40570_57	in	UniRef100_A0A4Y1X5U6	100	Preprotein translocase subunit YajC	44	syn	G->G	ko:K03210	YajC	-	-	-	-	-	-	-	-
1	AAK_1	AAK_1_24	AAK	k77_54500	66194	sub_C	31	no_sweep	0	AAK_g40570_66	in	UniRef100_UPI00036B60FA	100	signal recognition particle protein	656	syn	V->V	ko:K03106	SRP54,SRP54_N,SRP_SPB	-	-	-	-	-	-	-	-
1	AAK_1	AAK_1_25	AAK	k77_54500	145823	sub_G	31	no_sweep	0	AAK_g40570_125	in	UniRef100_A0A4Y1X4E2	100	GMP synthase [glutamine-hydrolyzing]	461	syn	A->A	ko:K01951	GATase,GMP_synt_C,NAD_synthase,tRNA_Me_trans	-	-	-	-	-	-	-	-
1	AAK_1	AAK_1_26	AAK	k77_54500	145829	sub_G	31	no_sweep	0	AAK_g40570_125	in	UniRef100_A0A4Y1X4E2	100	GMP synthase [glutamine-hydrolyzing]	455	syn	Ii->Ii	ko:K01951	GATase,GMP_synt_C,NAD_synthase,tRNA_Me_trans	-	-	-	-	-	-	-	-
1	AAK_1	AAK_1_27	AAK	k77_54500	145844	sub_C	31	no_sweep	0	AAK_g40570_125	in	UniRef100_A0A4Y1X4E2	100	GMP synthase [glutamine-hydrolyzing]	440	syn	P->P	ko:K01951	GATase,GMP_synt_C,NAD_synthase,tRNA_Me_trans	-	-	-	-	-	-	-	-
1	AAK_1	AAK_1_28	AAK	k77_54500	145942	sub_T	31	no_sweep	0	AAK_g40570_125	in	UniRef100_A0A4Y1X4E2	100	GMP synthase [glutamine-hydrolyzing]	342	non_syn	Vi->Mi	ko:K01951	GATase,GMP_synt_C,NAD_synthase,tRNA_Me_trans	-	-	-	-	-	-	-	-
1	AAK_1	AAK_1_29	AAK	k77_54500	146093	sub_G	31	no_sweep	0	AAK_g40570_125	in	UniRef100_A0A4Y1X4E2	100	GMP synthase [glutamine-hydrolyzing]	191	syn	F->F	ko:K01951	GATase,GMP_synt_C,NAD_synthase,tRNA_Me_trans	-	-	-	-	-	-	-	-
1	AAK_1	AAK_1_30	AAK	k77_64829	20778	sub_C	31	no_sweep	0	AAK_g47828_16	in	UniRef100_A0A4Y1X887	100	Peptidase	1511	syn	Y->Y	-	Peptidase_S9	-	-	-	-	-	-	-	-
1	AAK_1	AAK_1_31	AAK	k77_91792	12431	sub_G	31	no_sweep	0	AAK_g56554_15	in	UniRef100_R6XWP9	100	Glutaminase	449	non_syn	L->Li	ko:K01425	Glutaminase	-	-	-	-	-	-	-	-
1	AAK_1	AAK_1_32	AAK	k77_109215	39409	sub_T	80	no_sweep	0	AAK_g21417_28	upstream	UniRef100_R6Z127	100	2-amino-3-ketobutyrate coenzyme A ligase	-56	undefined	undefined	ko:K00639	Aminotran_1_2	AAK_g21417_29	upstream	UniRef100_R6XKN9	100	UDP-glucose 4-epimerase	-284	undefined	undefined	ko:K01784	Epimerase,GDP_Man_Dehyd
1	AAK_1	AAK_1_33	AAK	k77_210816	23833	sub_C	80	no_sweep	0	AAK_g70661_15	in	UniRef100_R6Z2K2	100	Efflux transporter RND family MFP subunit	333	non_syn	Ii->V	ko:K03585	HlyD_D23	-	-	-	-	-	-	-	-
1	AAK_1	AAK_1_34	AAK	k77_210816	23834	sub_G	80	no_sweep	0	AAK_g70661_15	in	UniRef100_R6Z2K2	100	Efflux transporter RND family MFP subunit	332	syn	A->A	ko:K03585	HlyD_D23	-	-	-	-	-	-	-	-
1	AAK_1	AAK_1_35	AAK	k77_210816	23840	sub_T	80	no_sweep	0	AAK_g70661_15	in	UniRef100_R6Z2K2	100	Efflux transporter RND family MFP subunit	326	syn	A->A	ko:K03585	HlyD_D23	-	-	-	-	-	-	-	-
1	AAK_1	AAK_1_36	AAK	k77_210816	23906	sub_C	80	no_sweep	0	AAK_g70661_15	in	UniRef100_R6Z2K2	100	Efflux transporter RND family MFP subunit	260	syn	T->T	ko:K03585	HlyD_D23	-	-	-	-	-	-	-	-
1	AAK_1	AAK_1_37	AAK	k77_210816	24122	sub_A	80	no_sweep	0	AAK_g70661_15	in	UniRef100_R6Z2K2	100	Efflux transporter RND family MFP subunit	44	syn	L->L	ko:K03585	HlyD_D23	-	-	-	-	-	-	-	-
1	AAK_1	AAK_1_38	AAK	k77_121810	193384	sub_T	80	no_sweep	0	AAK_g53268_153	in	UniRef100_A0A4Y1X6Z3	100	PCMD domain-containing protein	1069	non_syn	T->K	-	PCMD	-	-	-	-	-	-	-	-
1	AAK_1	AAK_1_39	AAK	k77_131205	29654	sub_C	80	no_sweep	0	AAK_g39432_20	in	UniRef100_A0A174F0F5	99.5	Arabinan endo-1,5-alpha-L-arabinosidase	192	non_syn	S->G	ko:K06113	Glyco_hydro_43	-	-	-	-	-	-	-	-
1	AAK_1	AAK_1_40	AAK	k77_144941	49382	del_1	80	no_sweep	0	AAK_g13549_43	upstream	UniRef100_A0A174Z8Z2	100	Ribulokinase	-121	undefined	undefined	ko:K00853	FGGY_C,FGGY_N	AAK_g13549_44	upstream	UniRef100_UPI00129ECE12	100	endonuclease	-113	undefined	undefined	-	Exo_endo_phos
1	AAK_1	AAK_1_41	AAK	k77_146536	23293	sub_G	80	no_sweep	0	-	-	-	-	-	-	-	-			-	-	-	-	-	-	-	-
1	AAK_1	AAK_1_42	AAK	k77_207907	27728	sub_T	80	no_sweep	0	AAK_g31661_20	in	UniRef100_A0A4Y1X9I2	99.9	Uncharacterized protein	2143	non_syn	A->V	-	Amidase_2,Big_2,Cu_amine_oxidN1,Metallophos,NAGPA,PKD,Pur_ac_phosph_N,SLH	-	-	-	-	-	-	-	-
1	AAK_1	AAK_1_43	AAK	k77_210816	24931	sub_A	80	no_sweep	0	-	-	-	-	-	-	-	-			-	-	-	-	-	-	-	-
1	AAK_1	AAK_1_44	AAK	k77_210816	24964	sub_G	80	no_sweep	0	-	-	-	-	-	-	-	-			-	-	-	-	-	-	-	-
1	AAK_1	AAK_1_45	AAK	k77_210816	24979	sub_G	80	no_sweep	0	-	-	-	-	-	-	-	-			-	-	-	-	-	-	-	-
1	AAK_1	AAK_1_46	AAK	k77_210816	24997	sub_A	80	no_sweep	0	-	-	-	-	-	-	-	-			-	-	-	-	-	-	-	-
1	AAK_1	AAK_1_47	AAK	k77_210816	25039	sub_T	80	no_sweep	0	-	-	-	-	-	-	-	-			-	-	-	-	-	-	-	-
1	AAK_1	AAK_1_48	AAK	k77_210816	25132	sub_C	80	no_sweep	0	-	-	-	-	-	-	-	-			-	-	-	-	-	-	-	-
1	AAK_1	AAK_1_49	AAK	k77_210816	25189	sub_A	80	no_sweep	0	-	-	-	-	-	-	-	-			-	-	-	-	-	-	-	-
1	AAK_1	AAK_1_50	AAK	k77_210816	25195	sub_G	80	no_sweep	0	-	-	-	-	-	-	-	-			-	-	-	-	-	-	-	-
1	AAK_1	AAK_1_51	AAK	k77_210816	25251	sub_T	80	no_sweep	0	-	-	-	-	-	-	-	-			-	-	-	-	-	-	-	-
1	AAK_1	AAK_1_52	AAK	k77_210816	25269	sub_T	80	no_sweep	0	-	-	-	-	-	-	-	-			-	-	-	-	-	-	-	-
1	AAK_1	AAK_1_53	AAK	k77_210816	25399	sub_T	80	no_sweep	0	-	-	-	-	-	-	-	-			-	-	-	-	-	-	-	-
1	AAK_1	AAK_1_54	AAK	k77_210816	25402	sub_T	80	no_sweep	0	-	-	-	-	-	-	-	-			-	-	-	-	-	-	-	-
1	AAK_1	AAK_1_55	AAK	k77_210816	25444	sub_G	80	no_sweep	0	-	-	-	-	-	-	-	-			-	-	-	-	-	-	-	-
1	AAK_1	AAK_1_56	AAK	k77_210816	25447	sub_C	80	no_sweep	0	-	-	-	-	-	-	-	-			-	-	-	-	-	-	-	-
1	AAK_1	AAK_1_57	AAK	k77_210816	25459	sub_C	80	no_sweep	0	-	-	-	-	-	-	-	-			-	-	-	-	-	-	-	-
1	AAK_1	AAK_1_58	AAK	k77_210816	25518	sub_T	80	no_sweep	0	-	-	-	-	-	-	-	-			-	-	-	-	-	-	-	-
1	AAK_1	AAK_1_59	AAK	k77_210816	25645	sub_C	80	no_sweep	0	-	-	-	-	-	-	-	-			-	-	-	-	-	-	-	-
1	AAK_1	AAK_1_60	AAK	k77_210816	25726	sub_G	80	no_sweep	0	-	-	-	-	-	-	-	-			-	-	-	-	-	-	-	-
1	AAK_1	AAK_1_61	AAK	k77_210816	25759	sub_A	80	no_sweep	0	-	-	-	-	-	-	-	-			-	-	-	-	-	-	-	-
1	AAK_1	AAK_1_62	AAK	k77_210816	25855	sub_C	80	no_sweep	0	-	-	-	-	-	-	-	-			-	-	-	-	-	-	-	-
1	AAK_1	AAK_1_63	AAK	k77_210816	25990	sub_C	80	no_sweep	0	-	-	-	-	-	-	-	-			-	-	-	-	-	-	-	-
1	AAK_1	AAK_1_64	AAK	k77_210816	26005	sub_T	80	no_sweep	0	-	-	-	-	-	-	-	-			-	-	-	-	-	-	-	-
1	AAK_1	AAK_1_65	AAK	k77_210816	26053	sub_A	80	no_sweep	0	-	-	-	-	-	-	-	-			-	-	-	-	-	-	-	-
1	AAK_1	AAK_1_66	AAK	k77_210816	26134	sub_T	80	no_sweep	0	-	-	-	-	-	-	-	-			-	-	-	-	-	-	-	-
1	AAK_1	AAK_1_67	AAK	k77_210816	26152	sub_A	80	no_sweep	0	-	-	-	-	-	-	-	-			-	-	-	-	-	-	-	-
1	AAK_1	AAK_1_68	AAK	k77_210816	26194	sub_T	80	no_sweep	0	-	-	-	-	-	-	-	-			-	-	-	-	-	-	-	-
1	AAK_1	AAK_1_69	AAK	k77_210816	26212	sub_G	80	no_sweep	0	-	-	-	-	-	-	-	-			-	-	-	-	-	-	-	-
1	AAK_1	AAK_1_70	AAK	k77_210816	26311	sub_G	80	no_sweep	0	-	-	-	-	-	-	-	-			-	-	-	-	-	-	-	-
1	AAK_1	AAK_1_71	AAK	k77_210816	26313	sub_T	80	no_sweep	0	-	-	-	-	-	-	-	-			-	-	-	-	-	-	-	-
1	AAK_1	AAK_1_72	AAK	k77_210816	26317	sub_A	80	no_sweep	0	-	-	-	-	-	-	-	-			-	-	-	-	-	-	-	-
1	AAK_1	AAK_1_73	AAK	k77_210816	26377	sub_C	80	no_sweep	0	AAK_g70661_18	in	UniRef100_A0A4Y1XAV7	100	Membrane protein	1190	syn	G->G	-	Bac_surface_Ag	-	-	-	-	-	-	-	-
1	AAK_1	AAK_1_74	AAK	k77_210816	26440	sub_C	80	no_sweep	0	AAK_g70661_18	in	UniRef100_A0A4Y1XAV7	100	Membrane protein	1127	syn	R->R	-	Bac_surface_Ag	-	-	-	-	-	-	-	-
1	AAK_1	AAK_1_75	AAK	k77_210816	26442	sub_T	80	no_sweep	0	AAK_g70661_18	in	UniRef100_A0A4Y1XAV7	100	Membrane protein	1125	syn	R->R	-	Bac_surface_Ag	-	-	-	-	-	-	-	-
1	AAK_1	AAK_1_76	AAK	k77_210816	26494	sub_G	80	no_sweep	0	AAK_g70661_18	in	UniRef100_A0A4Y1XAV7	100	Membrane protein	1073	syn	S->S	-	Bac_surface_Ag	-	-	-	-	-	-	-	-
1	AAK_1	AAK_1_77	AAK	k77_210816	26497	sub_T	80	no_sweep	0	AAK_g70661_18	in	UniRef100_A0A4Y1XAV7	100	Membrane protein	1070	non_syn	N->K	-	Bac_surface_Ag	-	-	-	-	-	-	-	-
1	AAK_1	AAK_1_78	AAK	k77_210816	26498	sub_C	80	no_sweep	0	AAK_g70661_18	in	UniRef100_A0A4Y1XAV7	100	Membrane protein	1069	non_syn	N->S	-	Bac_surface_Ag	-	-	-	-	-	-	-	-
1	AAK_1	AAK_1_79	AAK	k77_210816	26499	sub_C	80	no_sweep	0	AAK_g70661_18	in	UniRef100_A0A4Y1XAV7	100	Membrane protein	1068	non_syn	N->D	-	Bac_surface_Ag	-	-	-	-	-	-	-	-
1	AAK_1	AAK_1_80	AAK	k77_210816	26614	sub_G	80	no_sweep	0	AAK_g70661_18	in	UniRef100_A0A4Y1XAV7	100	Membrane protein	953	syn	G->G	-	Bac_surface_Ag	-	-	-	-	-	-	-	-
1	AAK_1	AAK_1_81	AAK	k77_210816	26710	sub_C	80	no_sweep	0	AAK_g70661_18	in	UniRef100_A0A4Y1XAV7	100	Membrane protein	857	syn	G->G	-	Bac_surface_Ag	-	-	-	-	-	-	-	-
1	AAK_1	AAK_1_82	AAK	k77_210816	26779	sub_C	80	no_sweep	0	AAK_g70661_18	in	UniRef100_A0A4Y1XAV7	100	Membrane protein	788	non_syn	L->Li	-	Bac_surface_Ag	-	-	-	-	-	-	-	-
1	AAK_1	AAK_1_83	AAK	k77_210816	26792	sub_A	80	no_sweep	0	AAK_g70661_18	in	UniRef100_A0A4Y1XAV7	100	Membrane protein	775	non_syn	Y->F	-	Bac_surface_Ag	-	-	-	-	-	-	-	-
1	AAK_1	AAK_1_84	AAK	k77_210816	26797	sub_G	80	no_sweep	0	AAK_g70661_18	in	UniRef100_A0A4Y1XAV7	100	Membrane protein	770	syn	T->T	-	Bac_surface_Ag	-	-	-	-	-	-	-	-
1	AAK_1	AAK_1_85	AAK	k77_210816	26872	sub_C	80	no_sweep	0	AAK_g70661_18	in	UniRef100_A0A4Y1XAV7	100	Membrane protein	695	syn	G->G	-	Bac_surface_Ag	-	-	-	-	-	-	-	-
1	AAK_1	AAK_1_86	AAK	k77_210816	26887	sub_C	80	no_sweep	0	AAK_g70661_18	in	UniRef100_A0A4Y1XAV7	100	Membrane protein	680	syn	T->T	-	Bac_surface_Ag	-	-	-	-	-	-	-	-
1	AAK_1	AAK_1_87	AAK	k77_210816	26899	sub_C	80	no_sweep	0	AAK_g70661_18	in	UniRef100_A0A4Y1XAV7	100	Membrane protein	668	syn	K->K	-	Bac_surface_Ag	-	-	-	-	-	-	-	-
1	AAK_1	AAK_1_88	AAK	k77_210816	26905	sub_T	80	no_sweep	0	AAK_g70661_18	in	UniRef100_A0A4Y1XAV7	100	Membrane protein	662	syn	G->G	-	Bac_surface_Ag	-	-	-	-	-	-	-	-
1	AAK_1	AAK_1_89	AAK	k77_210816	26913	sub_G	80	no_sweep	0	AAK_g70661_18	in	UniRef100_A0A4Y1XAV7	100	Membrane protein	654	non_syn	E->Q	-	Bac_surface_Ag	-	-	-	-	-	-	-	-
1	AAK_1	AAK_1_90	AAK	k77_210816	26915	sub_G	80	no_sweep	0	AAK_g70661_18	in	UniRef100_A0A4Y1XAV7	100	Membrane protein	652	non_syn	Q->P	-	Bac_surface_Ag	-	-	-	-	-	-	-	-
1	AAK_1	AAK_1_91	AAK	k77_210816	26916	sub_A	80	no_sweep	0	AAK_g70661_18	in	UniRef100_A0A4Y1XAV7	100	Membrane protein	651	non_syn	Q->*	-	Bac_surface_Ag	-	-	-	-	-	-	-	-
1	AAK_1	AAK_1_92	AAK	k77_210816	26923	sub_A	80	no_sweep	0	AAK_g70661_18	in	UniRef100_A0A4Y1XAV7	100	Membrane protein	644	syn	G->G	-	Bac_surface_Ag	-	-	-	-	-	-	-	-
1	AAK_1	AAK_1_93	AAK	k77_210816	26925	sub_G	80	no_sweep	0	AAK_g70661_18	in	UniRef100_A0A4Y1XAV7	100	Membrane protein	642	non_syn	G->R	-	Bac_surface_Ag	-	-	-	-	-	-	-	-
1	AAK_1	AAK_1_94	AAK	k77_210816	27016	sub_G	80	no_sweep	0	AAK_g70661_18	in	UniRef100_A0A4Y1XAV7	100	Membrane protein	551	syn	R->R	-	Bac_surface_Ag	-	-	-	-	-	-	-	-
1	AAK_1	AAK_1_95	AAK	k77_210816	27022	sub_C	80	no_sweep	0	AAK_g70661_18	in	UniRef100_A0A4Y1XAV7	100	Membrane protein	545	syn	K->K	-	Bac_surface_Ag	-	-	-	-	-	-	-	-
1	AAK_1	AAK_1_96	AAK	k77_210816	27025	sub_C	80	no_sweep	0	AAK_g70661_18	in	UniRef100_A0A4Y1XAV7	100	Membrane protein	542	non_syn	V->Vi	-	Bac_surface_Ag	-	-	-	-	-	-	-	-
1	AAK_1	AAK_1_97	AAK	k77_210816	27028	sub_G	80	no_sweep	0	AAK_g70661_18	in	UniRef100_A0A4Y1XAV7	100	Membrane protein	539	non_syn	Li->L	-	Bac_surface_Ag	-	-	-	-	-	-	-	-
1	AAK_1	AAK_1_98	AAK	k77_210816	27040	sub_T	80	no_sweep	0	AAK_g70661_18	in	UniRef100_A0A4Y1XAV7	100	Membrane protein	527	syn	E->E	-	Bac_surface_Ag	-	-	-	-	-	-	-	-
1	AAK_1	AAK_1_99	AAK	k77_210816	27070	sub_C	80	no_sweep	0	AAK_g70661_18	in	UniRef100_A0A4Y1XAV7	100	Membrane protein	497	syn	G->G	-	Bac_surface_Ag	-	-	-	-	-	-	-	-
1	AAK_1	AAK_1_100	AAK	k77_210816	27139	sub_T	80	no_sweep	0	AAK_g70661_18	in	UniRef100_A0A4Y1XAV7	100	Membrane protein	428	syn	K->K	-	Bac_surface_Ag	-	-	-	-	-	-	-	-
1	AAK_1	AAK_1_101	AAK	k77_210816	27190	sub_C	80	no_sweep	0	AAK_g70661_18	in	UniRef100_A0A4Y1XAV7	100	Membrane protein	377	syn	G->G	-	Bac_surface_Ag	-	-	-	-	-	-	-	-
1	AAK_1	AAK_1_102	AAK	k77_210816	27196	sub_G	80	no_sweep	0	AAK_g70661_18	in	UniRef100_A0A4Y1XAV7	100	Membrane protein	371	syn	Ii->Ii	-	Bac_surface_Ag	-	-	-	-	-	-	-	-
1	AAK_1	AAK_1_103	AAK	k77_210816	27232	sub_C	80	no_sweep	0	AAK_g70661_18	in	UniRef100_A0A4Y1XAV7	100	Membrane protein	335	syn	A->A	-	Bac_surface_Ag	-	-	-	-	-	-	-	-
1	AAK_1	AAK_1_104	AAK	k77_210816	27289	sub_A	80	no_sweep	0	AAK_g70661_18	in	UniRef100_A0A4Y1XAV7	100	Membrane protein	278	syn	G->G	-	Bac_surface_Ag	-	-	-	-	-	-	-	-
1	AAK_1	AAK_1_105	AAK	k77_210816	27301	sub_G	80	no_sweep	0	AAK_g70661_18	in	UniRef100_A0A4Y1XAV7	100	Membrane protein	266	syn	N->N	-	Bac_surface_Ag	-	-	-	-	-	-	-	-
1	AAK_1	AAK_1_106	AAK	k77_210816	27319	sub_G	80	no_sweep	0	AAK_g70661_18	in	UniRef100_A0A4Y1XAV7	100	Membrane protein	248	syn	G->G	-	Bac_surface_Ag	-	-	-	-	-	-	-	-
1	AAK_1	AAK_1_107	AAK	k77_210816	27331	sub_G	80	no_sweep	0	AAK_g70661_18	in	UniRef100_A0A4Y1XAV7	100	Membrane protein	236	syn	T->T	-	Bac_surface_Ag	-	-	-	-	-	-	-	-
1	AAK_1	AAK_1_108	AAK	k77_210816	27382	sub_A	80	no_sweep	0	AAK_g70661_18	in	UniRef100_A0A4Y1XAV7	100	Membrane protein	185	syn	Y->Y	-	Bac_surface_Ag	-	-	-	-	-	-	-	-
1	AAK_1	AAK_1_109	AAK	k77_294934	874	sub_C	80	no_sweep	0	AAK_g23408_1	in	UniRef100_A0A4Y1WN36	99.6	Membrane protein	1186	non_syn	Y->C	ko:K21572	SusD-like_3,SusD_RagB	-	-	-	-	-	-	-	-
1	AAK_1	AAK_1_110	AAK	k77_31670	89558	del_1	80	no_sweep	0	AAK_g12081_82	in	UniRef100_A0A174FP56	100	Exopolysaccharide biosynthesis protein related to N-acetylglucosamine-1-phosphodiester alpha-N-acetylglucosaminidase	16	unknown	unknown	ko:K05970	SASA	-	-	-	-	-	-	-	-
1	AAK_1	AAK_1_111	AAK	k77_54500	130110	sub_A	80	no_sweep	0	AAK_g40570_115	in	UniRef100_A0A174BNG2	100	Outer membrane protein/protective antigen OMA87	275	syn	T->T	-	Bac_surface_Ag	-	-	-	-	-	-	-	-
1	AAK_1	AAK_1_112	AAK	k77_144941	21934	sub_T	69	no_sweep	0	AAK_g13549_19	in	UniRef100_A0A174CDG7	100	Sensor protein srrB	501	syn	Li->Li	-	HATPase_c,HisKA	-	-	-	-	-	-	-	-
1	AAK_1	AAK_1_113	AAK	k77_144941	41566	del_1	69	no_sweep	0	AAK_g13549_37	downstream	UniRef100_R6Y7H3	100	2-oxoacid:ferredoxin oxidoreductase gamma subunit	813	undefined	undefined	ko:K00177	POR	AAK_g13549_38	upstream	UniRef100_R6XSI7	100	Antioxidant AhpC/TSA family	-229	undefined	undefined	ko:K03386	1-cysPrx_C,AhpC-TSA
1	AAK_1	AAK_1_114	AAK	k77_54500	146387	dangleLeft_BACK|+	69	no_sweep	0	AAK_g40570_125	upstream	UniRef100_A0A4Y1X4E2	100	GMP synthase [glutamine-hydrolyzing]	-103	undefined	undefined	ko:K01951	GATase,GMP_synt_C,NAD_synthase,tRNA_Me_trans	AAK_g40570_126	downstream	UniRef100_A0A174BLS3	100	Inosine-5'-monophosphate dehydrogenase	1837	undefined	undefined	ko:K00088	CBS,IMPDH,NMO
1	AAK_1	AAK_1_115	AAK	k77_54500	146398	sub_C	69	no_sweep	0	AAK_g40570_125	upstream	UniRef100_A0A4Y1X4E2	100	GMP synthase [glutamine-hydrolyzing]	-114	undefined	undefined	ko:K01951	GATase,GMP_synt_C,NAD_synthase,tRNA_Me_trans	AAK_g40570_126	downstream	UniRef100_A0A174BLS3	100	Inosine-5'-monophosphate dehydrogenase	1826	undefined	undefined	ko:K00088	CBS,IMPDH,NMO
1	AAK_1	AAK_1_116	AAK	k77_54500	146436	sub_G	69	no_sweep	0	AAK_g40570_125	upstream	UniRef100_A0A4Y1X4E2	100	GMP synthase [glutamine-hydrolyzing]	-152	undefined	undefined	ko:K01951	GATase,GMP_synt_C,NAD_synthase,tRNA_Me_trans	AAK_g40570_126	downstream	UniRef100_A0A174BLS3	100	Inosine-5'-monophosphate dehydrogenase	1788	undefined	undefined	ko:K00088	CBS,IMPDH,NMO
1	AAK_1	AAK_1_117	AAK	k77_54500	146444	sub_C	69	no_sweep	0	AAK_g40570_125	upstream	UniRef100_A0A4Y1X4E2	100	GMP synthase [glutamine-hydrolyzing]	-160	undefined	undefined	ko:K01951	GATase,GMP_synt_C,NAD_synthase,tRNA_Me_trans	AAK_g40570_126	downstream	UniRef100_A0A174BLS3	100	Inosine-5'-monophosphate dehydrogenase	1780	undefined	undefined	ko:K00088	CBS,IMPDH,NMO
1	AAK_1	AAK_1_118	AAK	k77_54500	146457	sub_T	69	no_sweep	0	AAK_g40570_125	upstream	UniRef100_A0A4Y1X4E2	100	GMP synthase [glutamine-hydrolyzing]	-173	undefined	undefined	ko:K01951	GATase,GMP_synt_C,NAD_synthase,tRNA_Me_trans	AAK_g40570_126	downstream	UniRef100_A0A174BLS3	100	Inosine-5'-monophosphate dehydrogenase	1767	undefined	undefined	ko:K00088	CBS,IMPDH,NMO
1	AAK_1	AAK_1_119	AAK	k77_54500	146473	sub_C	69	no_sweep	0	AAK_g40570_125	upstream	UniRef100_A0A4Y1X4E2	100	GMP synthase [glutamine-hydrolyzing]	-189	undefined	undefined	ko:K01951	GATase,GMP_synt_C,NAD_synthase,tRNA_Me_trans	AAK_g40570_126	downstream	UniRef100_A0A174BLS3	100	Inosine-5'-monophosphate dehydrogenase	1751	undefined	undefined	ko:K00088	CBS,IMPDH,NMO
1	AAK_1	AAK_1_120	AAK	k77_54500	146494	sub_T	69	no_sweep	0	AAK_g40570_125	upstream	UniRef100_A0A4Y1X4E2	100	GMP synthase [glutamine-hydrolyzing]	-210	undefined	undefined	ko:K01951	GATase,GMP_synt_C,NAD_synthase,tRNA_Me_trans	AAK_g40570_126	downstream	UniRef100_A0A174BLS3	100	Inosine-5'-monophosphate dehydrogenase	1730	undefined	undefined	ko:K00088	CBS,IMPDH,NMO
1	AAK_1	AAK_1_121	AAK	k77_54500	146505	sub_T	69	no_sweep	0	AAK_g40570_125	upstream	UniRef100_A0A4Y1X4E2	100	GMP synthase [glutamine-hydrolyzing]	-221	undefined	undefined	ko:K01951	GATase,GMP_synt_C,NAD_synthase,tRNA_Me_trans	AAK_g40570_126	downstream	UniRef100_A0A174BLS3	100	Inosine-5'-monophosphate dehydrogenase	1719	undefined	undefined	ko:K00088	CBS,IMPDH,NMO
1	AAK_1	AAK_1_122	AAK	k77_54500	146508	sub_G	69	no_sweep	0	AAK_g40570_125	upstream	UniRef100_A0A4Y1X4E2	100	GMP synthase [glutamine-hydrolyzing]	-224	undefined	undefined	ko:K01951	GATase,GMP_synt_C,NAD_synthase,tRNA_Me_trans	AAK_g40570_126	downstream	UniRef100_A0A174BLS3	100	Inosine-5'-monophosphate dehydrogenase	1716	undefined	undefined	ko:K00088	CBS,IMPDH,NMO
1	AAK_1	AAK_1_123	AAK	k77_54500	146532	sub_A	69	no_sweep	0	AAK_g40570_125	upstream	UniRef100_A0A4Y1X4E2	100	GMP synthase [glutamine-hydrolyzing]	-248	undefined	undefined	ko:K01951	GATase,GMP_synt_C,NAD_synthase,tRNA_Me_trans	AAK_g40570_126	downstream	UniRef100_A0A174BLS3	100	Inosine-5'-monophosphate dehydrogenase	1692	undefined	undefined	ko:K00088	CBS,IMPDH,NMO
1	AAK_1	AAK_1_124	AAK	k77_54500	146537	sub_T	69	no_sweep	0	AAK_g40570_125	upstream	UniRef100_A0A4Y1X4E2	100	GMP synthase [glutamine-hydrolyzing]	-253	undefined	undefined	ko:K01951	GATase,GMP_synt_C,NAD_synthase,tRNA_Me_trans	AAK_g40570_126	downstream	UniRef100_A0A174BLS3	100	Inosine-5'-monophosphate dehydrogenase	1687	undefined	undefined	ko:K00088	CBS,IMPDH,NMO
1	AAK_1	AAK_1_125	AAK	k77_54500	146570	sub_T	69	no_sweep	0	AAK_g40570_125	upstream	UniRef100_A0A4Y1X4E2	100	GMP synthase [glutamine-hydrolyzing]	-286	undefined	undefined	ko:K01951	GATase,GMP_synt_C,NAD_synthase,tRNA_Me_trans	AAK_g40570_126	downstream	UniRef100_A0A174BLS3	100	Inosine-5'-monophosphate dehydrogenase	1654	undefined	undefined	ko:K00088	CBS,IMPDH,NMO
1	AAK_1	AAK_1_126	AAK	k77_54500	146623	sub_T	69	no_sweep	0	AAK_g40570_125	upstream	UniRef100_A0A4Y1X4E2	100	GMP synthase [glutamine-hydrolyzing]	-339	undefined	undefined	ko:K01951	GATase,GMP_synt_C,NAD_synthase,tRNA_Me_trans	AAK_g40570_126	downstream	UniRef100_A0A174BLS3	100	Inosine-5'-monophosphate dehydrogenase	1601	undefined	undefined	ko:K00088	CBS,IMPDH,NMO
1	AAK_1	AAK_1_127	AAK	k77_54500	146629	sub_G	69	no_sweep	0	AAK_g40570_125	upstream	UniRef100_A0A4Y1X4E2	100	GMP synthase [glutamine-hydrolyzing]	-345	undefined	undefined	ko:K01951	GATase,GMP_synt_C,NAD_synthase,tRNA_Me_trans	AAK_g40570_126	downstream	UniRef100_A0A174BLS3	100	Inosine-5'-monophosphate dehydrogenase	1595	undefined	undefined	ko:K00088	CBS,IMPDH,NMO
1	AAK_1	AAK_1_128	AAK	k77_54500	146647	sub_G	69	no_sweep	0	AAK_g40570_125	upstream	UniRef100_A0A4Y1X4E2	100	GMP synthase [glutamine-hydrolyzing]	-363	undefined	undefined	ko:K01951	GATase,GMP_synt_C,NAD_synthase,tRNA_Me_trans	AAK_g40570_126	downstream	UniRef100_A0A174BLS3	100	Inosine-5'-monophosphate dehydrogenase	1577	undefined	undefined	ko:K00088	CBS,IMPDH,NMO
1	AAK_1	AAK_1_129	AAK	k77_54500	146730	sub_G	69	no_sweep	0	AAK_g40570_125	upstream	UniRef100_A0A4Y1X4E2	100	GMP synthase [glutamine-hydrolyzing]	-446	undefined	undefined	ko:K01951	GATase,GMP_synt_C,NAD_synthase,tRNA_Me_trans	AAK_g40570_126	downstream	UniRef100_A0A174BLS3	100	Inosine-5'-monophosphate dehydrogenase	1494	undefined	undefined	ko:K00088	CBS,IMPDH,NMO
1	AAK_1	AAK_1_130	AAK	k77_54500	146845	sub_G	69	no_sweep	0	AAK_g40570_126	in	UniRef100_A0A174BLS3	100	Inosine-5'-monophosphate dehydrogenase	1379	syn	R->R	ko:K00088	CBS,IMPDH,NMO	-	-	-	-	-	-	-	-
1	AAK_1	AAK_1_131	AAK	k77_54500	146935	sub_G	69	no_sweep	0	AAK_g40570_126	in	UniRef100_A0A174BLS3	100	Inosine-5'-monophosphate dehydrogenase	1289	syn	G->G	ko:K00088	CBS,IMPDH,NMO	-	-	-	-	-	-	-	-
1	AAK_1	AAK_1_132	AAK	k77_112616	25722	sub_A	69	no_sweep	0	AAK_g68855_22	in	UniRef100_A0A174CKH5	100	Predicted glycosyl hydrolase	287	syn	L->L	-	Glyco_hydro_76	-	-	-	-	-	-	-	-
1	AAK_1	AAK_1_133	AAK	k77_54500	144683	sub_A	69	no_sweep	0	AAK_g40570_125	downstream	UniRef100_A0A4Y1X4E2	100	GMP synthase [glutamine-hydrolyzing]	1601	undefined	undefined	ko:K01951	GATase,GMP_synt_C,NAD_synthase,tRNA_Me_trans	-	-	-	-	-	-	-	-
1	AAK_1	AAK_1_134	AAK	k77_54500	144685	sub_A	69	no_sweep	0	AAK_g40570_125	downstream	UniRef100_A0A4Y1X4E2	100	GMP synthase [glutamine-hydrolyzing]	1599	undefined	undefined	ko:K01951	GATase,GMP_synt_C,NAD_synthase,tRNA_Me_trans	-	-	-	-	-	-	-	-
1	AAK_1	AAK_1_135	AAK	k77_54500	144692	sub_G	69	no_sweep	0	AAK_g40570_125	downstream	UniRef100_A0A4Y1X4E2	100	GMP synthase [glutamine-hydrolyzing]	1592	undefined	undefined	ko:K01951	GATase,GMP_synt_C,NAD_synthase,tRNA_Me_trans	-	-	-	-	-	-	-	-
1	AAK_1	AAK_1_136	AAK	k77_54500	144693	sub_A	69	no_sweep	0	AAK_g40570_125	downstream	UniRef100_A0A4Y1X4E2	100	GMP synthase [glutamine-hydrolyzing]	1591	undefined	undefined	ko:K01951	GATase,GMP_synt_C,NAD_synthase,tRNA_Me_trans	-	-	-	-	-	-	-	-
1	AAK_1	AAK_1_137	AAK	k77_54500	144694	sub_T	69	no_sweep	0	AAK_g40570_125	downstream	UniRef100_A0A4Y1X4E2	100	GMP synthase [glutamine-hydrolyzing]	1590	undefined	undefined	ko:K01951	GATase,GMP_synt_C,NAD_synthase,tRNA_Me_trans	-	-	-	-	-	-	-	-
1	AAK_1	AAK_1_138	AAK	k77_54500	144696	sub_C	69	no_sweep	0	AAK_g40570_125	downstream	UniRef100_A0A4Y1X4E2	100	GMP synthase [glutamine-hydrolyzing]	1588	undefined	undefined	ko:K01951	GATase,GMP_synt_C,NAD_synthase,tRNA_Me_trans	-	-	-	-	-	-	-	-
1	AAK_1	AAK_1_139	AAK	k77_54500	144721	sub_C	69	no_sweep	0	AAK_g40570_125	downstream	UniRef100_A0A4Y1X4E2	100	GMP synthase [glutamine-hydrolyzing]	1563	undefined	undefined	ko:K01951	GATase,GMP_synt_C,NAD_synthase,tRNA_Me_trans	-	-	-	-	-	-	-	-
1	AAK_1	AAK_1_140	AAK	k77_54500	144722	sub_G	69	no_sweep	0	AAK_g40570_125	downstream	UniRef100_A0A4Y1X4E2	100	GMP synthase [glutamine-hydrolyzing]	1562	undefined	undefined	ko:K01951	GATase,GMP_synt_C,NAD_synthase,tRNA_Me_trans	-	-	-	-	-	-	-	-
1	AAK_1	AAK_1_141	AAK	k77_54500	144740	sub_C	69	no_sweep	0	AAK_g40570_125	in	UniRef100_A0A4Y1X4E2	100	GMP synthase [glutamine-hydrolyzing]	1544	syn	T->T	ko:K01951	GATase,GMP_synt_C,NAD_synthase,tRNA_Me_trans	-	-	-	-	-	-	-	-
1	AAK_1	AAK_1_142	AAK	k77_54500	144746	sub_G	69	no_sweep	0	AAK_g40570_125	in	UniRef100_A0A4Y1X4E2	100	GMP synthase [glutamine-hydrolyzing]	1538	syn	P->P	ko:K01951	GATase,GMP_synt_C,NAD_synthase,tRNA_Me_trans	-	-	-	-	-	-	-	-
1	AAK_1	AAK_1_143	AAK	k77_54500	144833	sub_G	69	no_sweep	0	AAK_g40570_125	in	UniRef100_A0A4Y1X4E2	100	GMP synthase [glutamine-hydrolyzing]	1451	syn	Y->Y	ko:K01951	GATase,GMP_synt_C,NAD_synthase,tRNA_Me_trans	-	-	-	-	-	-	-	-
1	AAK_1	AAK_1_144	AAK	k77_54500	144875	sub_A	69	no_sweep	0	AAK_g40570_125	in	UniRef100_A0A4Y1X4E2	100	GMP synthase [glutamine-hydrolyzing]	1409	syn	T->T	ko:K01951	GATase,GMP_synt_C,NAD_synthase,tRNA_Me_trans	-	-	-	-	-	-	-	-
1	AAK_1	AAK_1_145	AAK	k77_54500	144944	sub_G	69	no_sweep	0	AAK_g40570_125	in	UniRef100_A0A4Y1X4E2	100	GMP synthase [glutamine-hydrolyzing]	1340	syn	P->P	ko:K01951	GATase,GMP_synt_C,NAD_synthase,tRNA_Me_trans	-	-	-	-	-	-	-	-
1	AAK_1	AAK_1_146	AAK	k77_54500	144953	sub_G	69	no_sweep	0	AAK_g40570_125	in	UniRef100_A0A4Y1X4E2	100	GMP synthase [glutamine-hydrolyzing]	1331	syn	Ii->Ii	ko:K01951	GATase,GMP_synt_C,NAD_synthase,tRNA_Me_trans	-	-	-	-	-	-	-	-
1	AAK_1	AAK_1_147	AAK	k77_54500	144971	sub_C	69	no_sweep	0	AAK_g40570_125	in	UniRef100_A0A4Y1X4E2	100	GMP synthase [glutamine-hydrolyzing]	1313	non_syn	V->Vi	ko:K01951	GATase,GMP_synt_C,NAD_synthase,tRNA_Me_trans	-	-	-	-	-	-	-	-
1	AAK_1	AAK_1_148	AAK	k77_54500	144986	sub_C	69	no_sweep	0	AAK_g40570_125	in	UniRef100_A0A4Y1X4E2	100	GMP synthase [glutamine-hydrolyzing]	1298	syn	G->G	ko:K01951	GATase,GMP_synt_C,NAD_synthase,tRNA_Me_trans	-	-	-	-	-	-	-	-
1	AAK_1	AAK_1_149	AAK	k77_54500	145037	sub_T	69	no_sweep	0	AAK_g40570_125	in	UniRef100_A0A4Y1X4E2	100	GMP synthase [glutamine-hydrolyzing]	1247	syn	A->A	ko:K01951	GATase,GMP_synt_C,NAD_synthase,tRNA_Me_trans	-	-	-	-	-	-	-	-
1	AAK_1	AAK_1_150	AAK	k77_54500	145038	sub_C	69	no_sweep	0	AAK_g40570_125	in	UniRef100_A0A4Y1X4E2	100	GMP synthase [glutamine-hydrolyzing]	1246	non_syn	A->G	ko:K01951	GATase,GMP_synt_C,NAD_synthase,tRNA_Me_trans	-	-	-	-	-	-	-	-
1	AAK_1	AAK_1_151	AAK	k77_54500	145070	sub_G	69	no_sweep	0	AAK_g40570_125	in	UniRef100_A0A4Y1X4E2	100	GMP synthase [glutamine-hydrolyzing]	1214	syn	R->R	ko:K01951	GATase,GMP_synt_C,NAD_synthase,tRNA_Me_trans	-	-	-	-	-	-	-	-
1	AAK_1	AAK_1_152	AAK	k77_54500	145112	sub_C	69	no_sweep	0	AAK_g40570_125	in	UniRef100_A0A4Y1X4E2	100	GMP synthase [glutamine-hydrolyzing]	1172	non_syn	L->Li	ko:K01951	GATase,GMP_synt_C,NAD_synthase,tRNA_Me_trans	-	-	-	-	-	-	-	-
1	AAK_1	AAK_1_153	AAK	k77_54500	145124	sub_A	69	no_sweep	0	AAK_g40570_125	in	UniRef100_A0A4Y1X4E2	100	GMP synthase [glutamine-hydrolyzing]	1160	syn	Ii->Ii	ko:K01951	GATase,GMP_synt_C,NAD_synthase,tRNA_Me_trans	-	-	-	-	-	-	-	-
1	AAK_1	AAK_1_154	AAK	k77_54500	145136	sub_A	69	no_sweep	0	AAK_g40570_125	in	UniRef100_A0A4Y1X4E2	100	GMP synthase [glutamine-hydrolyzing]	1148	syn	R->R	ko:K01951	GATase,GMP_synt_C,NAD_synthase,tRNA_Me_trans	-	-	-	-	-	-	-	-
1	AAK_1	AAK_1_155	AAK	k77_54500	145139	sub_G	69	no_sweep	0	AAK_g40570_125	in	UniRef100_A0A4Y1X4E2	100	GMP synthase [glutamine-hydrolyzing]	1145	syn	G->G	ko:K01951	GATase,GMP_synt_C,NAD_synthase,tRNA_Me_trans	-	-	-	-	-	-	-	-
1	AAK_1	AAK_1_156	AAK	k77_54500	145145	sub_G	69	no_sweep	0	AAK_g40570_125	in	UniRef100_A0A4Y1X4E2	100	GMP synthase [glutamine-hydrolyzing]	1139	syn	R->R	ko:K01951	GATase,GMP_synt_C,NAD_synthase,tRNA_Me_trans	-	-	-	-	-	-	-	-
1	AAK_1	AAK_1_157	AAK	k77_54500	145205	sub_C	69	no_sweep	0	AAK_g40570_125	in	UniRef100_A0A4Y1X4E2	100	GMP synthase [glutamine-hydrolyzing]	1079	syn	E->E	ko:K01951	GATase,GMP_synt_C,NAD_synthase,tRNA_Me_trans	-	-	-	-	-	-	-	-
1	AAK_1	AAK_1_158	AAK	k77_54500	145247	sub_A	69	no_sweep	0	AAK_g40570_125	in	UniRef100_A0A4Y1X4E2	100	GMP synthase [glutamine-hydrolyzing]	1037	syn	S->S	ko:K01951	GATase,GMP_synt_C,NAD_synthase,tRNA_Me_trans	-	-	-	-	-	-	-	-
1	AAK_1	AAK_1_159	AAK	k77_54500	145337	sub_G	69	no_sweep	0	AAK_g40570_125	in	UniRef100_A0A4Y1X4E2	100	GMP synthase [glutamine-hydrolyzing]	947	non_syn	E->D	ko:K01951	GATase,GMP_synt_C,NAD_synthase,tRNA_Me_trans	-	-	-	-	-	-	-	-
1	AAK_1	AAK_1_160	AAK	k77_54500	145403	sub_G	69	no_sweep	0	AAK_g40570_125	in	UniRef100_A0A4Y1X4E2	100	GMP synthase [glutamine-hydrolyzing]	881	syn	A->A	ko:K01951	GATase,GMP_synt_C,NAD_synthase,tRNA_Me_trans	-	-	-	-	-	-	-	-
1	AAK_1	AAK_1_161	AAK	k77_54500	145409	sub_G	69	no_sweep	0	AAK_g40570_125	in	UniRef100_A0A4Y1X4E2	100	GMP synthase [glutamine-hydrolyzing]	875	syn	D->D	ko:K01951	GATase,GMP_synt_C,NAD_synthase,tRNA_Me_trans	-	-	-	-	-	-	-	-
1	AAK_1	AAK_1_162	AAK	k77_54500	145412	sub_A	69	no_sweep	0	AAK_g40570_125	in	UniRef100_A0A4Y1X4E2	100	GMP synthase [glutamine-hydrolyzing]	872	syn	G->G	ko:K01951	GATase,GMP_synt_C,NAD_synthase,tRNA_Me_trans	-	-	-	-	-	-	-	-
1	AAK_1	AAK_1_163	AAK	k77_54500	145453	sub_A	69	no_sweep	0	AAK_g40570_125	in	UniRef100_A0A4Y1X4E2	100	GMP synthase [glutamine-hydrolyzing]	831	syn	Li->Li	ko:K01951	GATase,GMP_synt_C,NAD_synthase,tRNA_Me_trans	-	-	-	-	-	-	-	-
1	AAK_1	AAK_1_164	AAK	k77_54500	145583	sub_G	69	no_sweep	0	AAK_g40570_125	in	UniRef100_A0A4Y1X4E2	100	GMP synthase [glutamine-hydrolyzing]	701	syn	V->V	ko:K01951	GATase,GMP_synt_C,NAD_synthase,tRNA_Me_trans	-	-	-	-	-	-	-	-
1	AAK_1	AAK_1_165	AAK	k77_54500	145655	sub_T	69	no_sweep	0	AAK_g40570_125	in	UniRef100_A0A4Y1X4E2	100	GMP synthase [glutamine-hydrolyzing]	629	non_syn	Vi->V	ko:K01951	GATase,GMP_synt_C,NAD_synthase,tRNA_Me_trans	-	-	-	-	-	-	-	-
1	AAK_1	AAK_1_166	AAK	k77_54500	145670	sub_G	69	no_sweep	0	AAK_g40570_125	in	UniRef100_A0A4Y1X4E2	100	GMP synthase [glutamine-hydrolyzing]	614	syn	T->T	ko:K01951	GATase,GMP_synt_C,NAD_synthase,tRNA_Me_trans	-	-	-	-	-	-	-	-
1	AAK_1	AAK_1_167	AAK	k77_54500	145701	sub_A	69	no_sweep	0	AAK_g40570_125	in	UniRef100_A0A4Y1X4E2	100	GMP synthase [glutamine-hydrolyzing]	583	non_syn	A->Vi	ko:K01951	GATase,GMP_synt_C,NAD_synthase,tRNA_Me_trans	-	-	-	-	-	-	-	-
1	AAK_1	AAK_1_168	AAK	k77_54500	145745	sub_A	69	no_sweep	0	AAK_g40570_125	in	UniRef100_A0A4Y1X4E2	100	GMP synthase [glutamine-hydrolyzing]	539	syn	V->V	ko:K01951	GATase,GMP_synt_C,NAD_synthase,tRNA_Me_trans	-	-	-	-	-	-	-	-
1	AAK_1	AAK_1_169	AAK	k77_54500	145772	sub_G	69	no_sweep	0	AAK_g40570_125	in	UniRef100_A0A4Y1X4E2	100	GMP synthase [glutamine-hydrolyzing]	512	syn	T->T	ko:K01951	GATase,GMP_synt_C,NAD_synthase,tRNA_Me_trans	-	-	-	-	-	-	-	-
1	AAK_1	AAK_1_170	AAK	k77_54500	145811	sub_C	69	no_sweep	0	AAK_g40570_125	in	UniRef100_A0A4Y1X4E2	100	GMP synthase [glutamine-hydrolyzing]	473	non_syn	D->E	ko:K01951	GATase,GMP_synt_C,NAD_synthase,tRNA_Me_trans	-	-	-	-	-	-	-	-
1	AAK_1	AAK_1_171	AAK	k77_54500	145831	sub_C	69	no_sweep	0	AAK_g40570_125	in	UniRef100_A0A4Y1X4E2	100	GMP synthase [glutamine-hydrolyzing]	453	non_syn	Ii->V	ko:K01951	GATase,GMP_synt_C,NAD_synthase,tRNA_Me_trans	-	-	-	-	-	-	-	-
1	AAK_1	AAK_1_172	AAK	k77_54500	145835	sub_G	69	no_sweep	0	AAK_g40570_125	in	UniRef100_A0A4Y1X4E2	100	GMP synthase [glutamine-hydrolyzing]	449	syn	Y->Y	ko:K01951	GATase,GMP_synt_C,NAD_synthase,tRNA_Me_trans	-	-	-	-	-	-	-	-
1	AAK_1	AAK_1_173	AAK	k77_54500	145840	sub_C	69	no_sweep	0	AAK_g40570_125	in	UniRef100_A0A4Y1X4E2	100	GMP synthase [glutamine-hydrolyzing]	444	non_syn	N->D	ko:K01951	GATase,GMP_synt_C,NAD_synthase,tRNA_Me_trans	-	-	-	-	-	-	-	-
1	AAK_1	AAK_1_174	AAK	k77_54500	145841	sub_G	69	no_sweep	0	AAK_g40570_125	in	UniRef100_A0A4Y1X4E2	100	GMP synthase [glutamine-hydrolyzing]	443	syn	A->A	ko:K01951	GATase,GMP_synt_C,NAD_synthase,tRNA_Me_trans	-	-	-	-	-	-	-	-
1	AAK_1	AAK_1_175	AAK	k77_54500	145850	sub_G	69	no_sweep	0	AAK_g40570_125	in	UniRef100_A0A4Y1X4E2	100	GMP synthase [glutamine-hydrolyzing]	434	syn	S->S	ko:K01951	GATase,GMP_synt_C,NAD_synthase,tRNA_Me_trans	-	-	-	-	-	-	-	-
1	AAK_1	AAK_1_176	AAK	k77_54500	146009	sub_T	69	no_sweep	0	AAK_g40570_125	in	UniRef100_A0A4Y1X4E2	100	GMP synthase [glutamine-hydrolyzing]	275	syn	A->A	ko:K01951	GATase,GMP_synt_C,NAD_synthase,tRNA_Me_trans	-	-	-	-	-	-	-	-
1	AAK_1	AAK_1_177	AAK	k77_54500	146024	sub_C	69	no_sweep	0	AAK_g40570_125	in	UniRef100_A0A4Y1X4E2	100	GMP synthase [glutamine-hydrolyzing]	260	syn	G->G	ko:K01951	GATase,GMP_synt_C,NAD_synthase,tRNA_Me_trans	-	-	-	-	-	-	-	-
1	AAK_1	AAK_1_178	AAK	k77_54500	146111	sub_G	69	no_sweep	0	AAK_g40570_125	in	UniRef100_A0A4Y1X4E2	100	GMP synthase [glutamine-hydrolyzing]	173	syn	Ii->Ii	ko:K01951	GATase,GMP_synt_C,NAD_synthase,tRNA_Me_trans	-	-	-	-	-	-	-	-
1	AAK_1	AAK_1_179	AAK	k77_54500	146117	sub_G	69	no_sweep	0	AAK_g40570_125	in	UniRef100_A0A4Y1X4E2	100	GMP synthase [glutamine-hydrolyzing]	167	syn	G->G	ko:K01951	GATase,GMP_synt_C,NAD_synthase,tRNA_Me_trans	-	-	-	-	-	-	-	-
1	AAK_1	AAK_1_180	AAK	k77_54500	146259	sub_C	69	no_sweep	0	AAK_g40570_125	in	UniRef100_A0A4Y1X4E2	100	GMP synthase [glutamine-hydrolyzing]	25	non_syn	H->R	ko:K01951	GATase,GMP_synt_C,NAD_synthase,tRNA_Me_trans	-	-	-	-	-	-	-	-
1	AAK_1	AAK_1_181	AAK	k77_144941	41566	ins_C	7	no_sweep	0	AAK_g13549_37	downstream	UniRef100_R6Y7H3	100	2-oxoacid:ferredoxin oxidoreductase gamma subunit	813	undefined	undefined	ko:K00177	POR	AAK_g13549_38	upstream	UniRef100_R6XSI7	100	Antioxidant AhpC/TSA family	-229	undefined	undefined	ko:K03386	1-cysPrx_C,AhpC-TSA
1	AAK_1	AAK_1_182	AAK	k77_268646	57490	sub_A	7	no_sweep	0	AAK_g14149_39	downstream	UniRef100_A0A175A1S6	100	Arm-DNA-bind_5 domain-containing protein	312	undefined	undefined	-	Arm-DNA-bind_5,Phage_int_SAM_5,Phage_integrase	AAK_g14149_40	upstream	UniRef100_A0A175A6T5	27.759	Site-specific tyrosine recombinase XerC	-8	undefined	undefined	-	Arm-DNA-bind_5,Phage_int_SAM_5,Phage_integrase
1	AAK_1	AAK_1_183	AAK	k77_124890	234870	sub_A	7	no_sweep	0	AAK_g24409_182	in	UniRef100_A0A173WET9	100	Uncharacterized protein	816	syn	Li->Li	-	HEPN	-	-	-	-	-	-	-	-
1	AAK_1	AAK_1_184	AAK	k77_144941	85045	sub_C	7	no_sweep	0	-	-	-	-	-	-	-	-			-	-	-	-	-	-	-	-
1	AAK_1	AAK_1_185	AAK	k77_54500	12399	ins_G	7	no_sweep	0	AAK_g40570_15	in	UniRef100_R6XLY3	100	Uncharacterized protein	84	unknown	unknown			-	-	-	-	-	-	-	-
1	AAK_1	AAK_1_186	AAK	k77_54500	59053	ins_G	7	no_sweep	0	-	-	-	-	-	-	-	-			-	-	-	-	-	-	-	-
1	AAK_1	AAK_1_187	AAK	k77_62111	20729	sub_G	7	no_sweep	0	AAK_g5840_13	in	UniRef100_A0A173YDN6	100	1-deoxy-D-xylulose-5-phosphate synthase	682	non_syn	A->G	ko:K01662	DXP_synthase_N,E1_dh,Transket_pyr,Transketolase_C	-	-	-	-	-	-	-	-
1	AAK_1	AAK_1_188	AAK	k77_54500	122519	sub_C	3	no_sweep	0	AAK_g40570_111	downstream	UniRef100_R6Z203	100	ParB domain-containing protein	661	undefined	undefined	-	ParBc	AAK_g40570_112	upstream	UniRef100_R6XLG9	100	UPF0056 membrane protein	-307	undefined	undefined	ko:K05595	MarC
1	AAK_1	AAK_1_189	AAK	k77_268646	5778	sub_G	3	no_sweep	0	AAK_g14149_4	in	UniRef100_A0A174GBQ4	100	Uncharacterized protein	1014	non_syn	N->H	-	DUF4849	-	-	-	-	-	-	-	-
1	AAK_1	AAK_1_190	AAK	k77_64829	54780	sub_T	3	no_sweep	0	-	-	-	-	-	-	-	-			-	-	-	-	-	-	-	-
1	AAK_1	AAK_1_191	AAK	k77_130853	13736	del_2	3	no_sweep	0	AAK_g33921_14	in	UniRef100_A0A656Q614	99	Beta-1,6-N-acetylglucosaminyltransferase	805	unknown	unknown	-	Branch	-	-	-	-	-	-	-	-
1	AAK_1	AAK_1_192	AAK	k77_143511	110604	del_1	3	no_sweep	0	AAK_g63753_107	downstream	UniRef100_UPI00129D9788	100	GNAT family N-acetyltransferase	804	undefined	undefined	ko:K03827	Acetyltransf_10	AAK_g63753_108	downstream	UniRef100_UPI00122F7D51	21.374	transglutaminase domain-containing protein	271	undefined	undefined	-	Transglut_core
1	AAK_1	AAK_1_193	AAK	k77_44874	31811	ins_G	3	no_sweep	0	AAK_g49794_22	in	UniRef100_R6XL93	100	Uncharacterized protein	26	unknown	unknown			-	-	-	-	-	-	-	-
1	AAK_1	AAK_1_194	AAK	k77_20024	16105	del_1	1	no_sweep	0	AAK_g61616_10	upstream	UniRef100_A0A175A240	100	Uncharacterized protein	-136	undefined	undefined			-	-	-	-	-	-	-	-
1	AAK_1	AAK_1_195	AAK	k77_207907	13220	del_1	1	no_sweep	0	AAK_g31661_12	downstream	UniRef100_R6XVJ0	100	Adenylosuccinate lyase	1891	undefined	undefined	ko:K01756	ASL_C,Lyase_1	AAK_g31661_13	upstream	UniRef100_A0A4Y1XA70	99.8	Uncharacterized protein	-131	undefined	undefined	-	-
1	AAK_1	AAK_1_196	AAK	k77_207907	13220	ins_G	1	no_sweep	0	AAK_g31661_12	downstream	UniRef100_R6XVJ0	100	Adenylosuccinate lyase	1891	undefined	undefined	ko:K01756	ASL_C,Lyase_1	AAK_g31661_13	upstream	UniRef100_A0A4Y1XA70	99.8	Uncharacterized protein	-131	undefined	undefined	-	-
2	AAK_2	AAK_2_1	AAK	k77_34671	49431	ins_G	2	no_sweep	0	AAK_g56231_55	in	UniRef100_B0MZV1	100	Methyltransferase	281	unknown	unknown	ko:K00571	N6_N4_Mtase	-	-	-	-	-	-	-	-
2	AAK_2	AAK_2_2	AAK	k77_152007	16791	ins_CC	2	no_sweep	0	AAK_g36208_13	upstream	UniRef100_B0MXF6	96.2	Uncharacterized protein	-373	undefined	undefined	-	BACON,DUF4595	AAK_g36208_14	downstream	UniRef100_B0MXF8	100	LAO/AO transport system ATPase	1270	undefined	undefined	ko:K07588	ArgK
2	AAK_2	AAK_2_3	AAK	k77_70965	8671	sub_C	5	no_sweep	0	AAK_g61524_10	downstream	UniRef100_A0A383TZM3	62.884	Type IV secretory pathway, VirD4 components	1094	undefined	undefined	-	T4SS-DNA_transf,TraG-D_C,TrwB_AAD_bind,YWFCY	AAK_g61524_9	upstream	UniRef100_A0A642LNJ7	99.6	Group II intron reverse transcriptase/maturase	-460	undefined	undefined	ko:K00986	GIIM,HNH,RVT_1,RVT_N
2	AAK_2	AAK_2_4	AAK	k77_70965	7756	sub_A	5	no_sweep	0	AAK_g61524_9	in	UniRef100_A0A642LNJ7	99.6	Group II intron reverse transcriptase/maturase	455	syn	R->R	ko:K00986	GIIM,HNH,RVT_1,RVT_N	-	-	-	-	-	-	-	-
2	AAK_2	AAK_2_5	AAK	k77_70965	8041	sub_A	5	no_sweep	0	AAK_g61524_9	in	UniRef100_A0A642LNJ7	99.6	Group II intron reverse transcriptase/maturase	170	syn	T->T	ko:K00986	GIIM,HNH,RVT_1,RVT_N	-	-	-	-	-	-	-	-
2	AAK_2	AAK_2_6	AAK	k77_70965	8056	sub_T	5	no_sweep	0	AAK_g61524_9	in	UniRef100_A0A642LNJ7	99.6	Group II intron reverse transcriptase/maturase	155	non_syn	Li->L	ko:K00986	GIIM,HNH,RVT_1,RVT_N	-	-	-	-	-	-	-	-
2	AAK_2	AAK_2_7	AAK	k77_70965	8130	sub_T	5	no_sweep	0	AAK_g61524_9	in	UniRef100_A0A642LNJ7	99.6	Group II intron reverse transcriptase/maturase	81	non_syn	A->T	ko:K00986	GIIM,HNH,RVT_1,RVT_N	-	-	-	-	-	-	-	-
2	AAK_2	AAK_2_8	AAK	k77_70965	8679	sub_T	3	no_sweep	0	AAK_g61524_10	downstream	UniRef100_A0A383TZM3	62.884	Type IV secretory pathway, VirD4 components	1086	undefined	undefined	-	T4SS-DNA_transf,TraG-D_C,TrwB_AAD_bind,YWFCY	AAK_g61524_9	upstream	UniRef100_A0A642LNJ7	99.6	Group II intron reverse transcriptase/maturase	-468	undefined	undefined	ko:K00986	GIIM,HNH,RVT_1,RVT_N
2	AAK_2	AAK_2_9	AAK	k77_70965	7981	sub_A	3	no_sweep	0	AAK_g61524_9	in	UniRef100_A0A642LNJ7	99.6	Group II intron reverse transcriptase/maturase	230	non_syn	K->N	ko:K00986	GIIM,HNH,RVT_1,RVT_N	-	-	-	-	-	-	-	-
2	AAK_2	AAK_2_10	AAK	k77_70965	7987	sub_T	3	no_sweep	0	AAK_g61524_9	in	UniRef100_A0A642LNJ7	99.6	Group II intron reverse transcriptase/maturase	224	syn	G->G	ko:K00986	GIIM,HNH,RVT_1,RVT_N	-	-	-	-	-	-	-	-
2	AAK_2	AAK_2_11	AAK	k77_70965	8814	sub_T	4	no_sweep	0	AAK_g61524_10	downstream	UniRef100_A0A383TZM3	62.884	Type IV secretory pathway, VirD4 components	951	undefined	undefined	-	T4SS-DNA_transf,TraG-D_C,TrwB_AAD_bind,YWFCY	AAK_g61524_9	upstream	UniRef100_A0A642LNJ7	99.6	Group II intron reverse transcriptase/maturase	-603	undefined	undefined	ko:K00986	GIIM,HNH,RVT_1,RVT_N
2	AAK_2	AAK_2_12	AAK	k77_70965	8815	sub_G	4	no_sweep	0	AAK_g61524_10	downstream	UniRef100_A0A383TZM3	62.884	Type IV secretory pathway, VirD4 components	950	undefined	undefined	-	T4SS-DNA_transf,TraG-D_C,TrwB_AAD_bind,YWFCY	AAK_g61524_9	upstream	UniRef100_A0A642LNJ7	99.6	Group II intron reverse transcriptase/maturase	-604	undefined	undefined	ko:K00986	GIIM,HNH,RVT_1,RVT_N
2	AAK_2	AAK_2_13	AAK	k77_158264	86161	sub_T	4	no_sweep	0	AAK_g55880_66	downstream	UniRef100_A0A356I4A0	100	Acyl-CoA thioesterase	546	undefined	undefined	ko:K07107	4HBT,4HBT_2	AAK_g55880_67	downstream	UniRef100_R7JK26	100	ATPase/histidine kinase/DNA gyrase B/HSP90 domain protein	2098	undefined	undefined	ko:K04079	HATPase_c_3,HSP90
2	AAK_2	AAK_2_14	AAK	k77_70965	6676	sub_G	4	no_sweep	0	AAK_g61524_9	in	UniRef100_A0A642LNJ7	99.6	Group II intron reverse transcriptase/maturase	1535	syn	C->C	ko:K00986	GIIM,HNH,RVT_1,RVT_N	-	-	-	-	-	-	-	-
2	AAK_2	AAK_2_15	AAK	k77_108917	21572	ins_GG	1	no_sweep	0	AAK_g14735_23	downstream	UniRef100_A0A3D1NPY4	99.5	DUF4294 domain-containing protein	1111	undefined	undefined	-	DUF4294	AAK_g14735_24	upstream	UniRef100_A0A3D1NR80	86.307	Uncharacterized protein	-93	undefined	undefined	-	BACON
2	AAK_2	AAK_2_16	AAK	k77_125174	9414	ins_G	1	no_sweep	0	AAK_g30266_8	upstream	UniRef100_R7JR78	100	Uncharacterized protein	-178	undefined	undefined	-	-	-	-	-	-	-	-	-	-
2	AAK_2	AAK_2_17	AAK	k77_133012	9652	sub_G	5	no_sweep	0	AAK_g63859_9	in	UniRef100_A0A3D1NN11	98.128	DUF4301 domain-containing protein	1077	non_syn	Li->Vi	-	DUF4301	-	-	-	-	-	-	-	-
2	AAK_2	AAK_2_18	AAK	k77_145046	19543	sub_C	5	no_sweep	0	AAK_g14976_13	downstream	UniRef100_R7JLI8	100	Uncharacterized protein	633	undefined	undefined	-	DUF1343	AAK_g14976_14	upstream	UniRef100_A0A3D1NQH0	97.715	Uncharacterized protein	-329	undefined	undefined	-	BACON
2	AAK_2	AAK_2_19	AAK	k77_18306	12631	sub_G	5	no_sweep	0	AAK_g41165_10	in	UniRef100_R7JKT6	100	MazG family protein	515	non_syn	E->D	ko:K02428	MazG	-	-	-	-	-	-	-	-
2	AAK_2	AAK_2_20	AAK	k77_20827	23321	sub_G	5	no_sweep	0	-	-	-	-	-	-	-	-			-	-	-	-	-	-	-	-
2	AAK_2	AAK_2_21	AAK	k77_20827	23328	sub_C	5	no_sweep	0	-	-	-	-	-	-	-	-			-	-	-	-	-	-	-	-
2	AAK_2	AAK_2_22	AAK	k77_152007	29444	ins_C	1	no_sweep	0	AAK_g36208_27	downstream	UniRef100_R7JJ36	95.256	Elongation factor Ts	909	undefined	undefined	ko:K02357	EF_TS	AAK_g36208_28	downstream	UniRef100_A0A358S2D5	100	Uncharacterized protein	846	undefined	undefined
3	AAK_4	AAK_4_1	AAK	k77_222123	2059	sub_A	3	no_sweep	0	AAK_g9645_3	downstream	UniRef100_A0A329TRM4	100	DNA-binding protein HU	311	undefined	undefined	ko:K03530	Bac_DNA_binding	AAK_g9645_4	upstream	UniRef100_A0A329TKB6	100	RNA-binding S4 domain-containing protein	-181	undefined	undefined	-	S4
3	AAK_4	AAK_4_2	AAK	k77_171073	16811	sub_C	3	no_sweep	0	AAK_g23987_15	in	UniRef100_A0A564TJX8	98.6	Nicotinate-nucleotide--dimethylbenzimidazole phosphoribosyltransferase	125	non_syn	E->D	ko:K00768	DBI_PRT	-	-	-	-	-	-	-	-
3	AAK_4	AAK_4_3	AAK	k77_278156	17440	sub_C	3	no_sweep	0	AAK_g4578_15	in	UniRef100_UPI00130EB459	100	DAK2 domain-containing protein	511	non_syn	Li->R	ko:K07030	Dak1_2,Dak2	-	-	-	-	-	-	-	-
3	AAK_4	AAK_4_4	AAK	k77_232161	17224	ins_C	1	no_sweep	0	AAK_g8771_18	in	UniRef100_A0A329U093	81.928	N-acetylmuramoyl-L-alanine amidase	698	unknown	unknown	-	Amidase_3	-	-	-	-	-	-	-	-
3	AAK_4	AAK_4_5	AAK	k77_134291	9409	ins_C	1	no_sweep	0	AAK_g8117_8	in	UniRef100_D4K215	98.3	Diguanylate cyclase (GGDEF) domain	1864	unknown	unknown	ko:K07814	GGDEF,HD,Response_reg	-	-	-	-	-	-	-	-
3	AAK_4	AAK_4_6	AAK	k77_246086	15773	ins_G	1	no_sweep	0	AAK_g53148_18	in	UniRef100_A0A564SYC1	57.599	Acetylxylan esterase	679	unknown	unknown	-	Abhydrolase_3,Peptidase_S9	-	-	-	-	-	-	-	-
3	AAK_4	AAK_4_7	AAK	k77_25181	8724	del_1	1	no_sweep	0	AAK_g65580_8	downstream	UniRef100_A0A329TYN1	99.5	Acyl-CoA--6-aminopenicillanic acid acyltransferase	1293	undefined	undefined	-	AAT,CBAH	AAK_g65580_9	upstream	UniRef100_A0A564U329	89	Uncharacterized protein	-224	undefined	undefined
3	AAK_4	AAK_4_8	AAK	k77_25181	8870	ins_G	1	no_sweep	0	AAK_g65580_8	downstream	UniRef100_A0A329TYN1	99.5	Acyl-CoA--6-aminopenicillanic acid acyltransferase	1439	undefined	undefined	-	AAT,CBAH	AAK_g65580_9	upstream	UniRef100_A0A564U329	89	Uncharacterized protein	-78	undefined	undefined
3	AAK_4	AAK_4_9	AAK	k77_25181	8870	ins_GG	1	no_sweep	0	AAK_g65580_8	downstream	UniRef100_A0A329TYN1	99.5	Acyl-CoA--6-aminopenicillanic acid acyltransferase	1439	undefined	undefined	-	AAT,CBAH	AAK_g65580_9	upstream	UniRef100_A0A564U329	89	Uncharacterized protein	-78	undefined	undefined
3	AAK_4	AAK_4_10	AAK	k77_314646	55090	ins_GGG	1	no_sweep	0	AAK_g12353_47	downstream	UniRef100_UPI00122CE8E7	98.9	response regulator	2251	undefined	undefined	-	HATPase_c,HisKA,Response_reg,dCache_1,sCache_2	AAK_g12353_48	upstream	UniRef100_D4K0Q7	99.5	Uncharacterized protein	-91	undefined	undefined
3	AAK_4	AAK_4_11	AAK	k77_77622	15098	sub_A	1	no_sweep	0	AAK_g5665_11	downstream	UniRef100_A0A564SX18	71.972	Osmoregulated proline transporter OpuE	235	undefined	undefined	ko:K11928	SSF	AAK_g5665_12	downstream	UniRef100_A0A564UTU8	99.4	Lipid A export ATP-binding/permease protein MsbA	1658	undefined	undefined	-	ABC_membrane,ABC_tran
4	AAK_5	AAK_5_1	AAK	k77_131003	37181	sub_G	2	no_sweep	0	AAK_g36410_32	in	UniRef100_A0A2U2EJ44	100	Cyclic-di-AMP phosphodiesterase	1399	non_syn	V->A	-	DHH,DHHA1	-	-	-	-	-	-	-	-
4	AAK_5	AAK_5_2	AAK	k77_139042	897	sub_T	2	no_sweep	0	AAK_g3944_1	in	UniRef100_C6JA41	85.127	Uncharacterized protein	896	syn	Y->Y	-	Recombinase,Resolvase	-	-	-	-	-	-	-	-
4	AAK_5	AAK_5_3	AAK	k77_200316	92828	sub_A	2	no_sweep	0	AAK_g59489_79	in	UniRef100_A0A173RAM9	100	Uncharacterized protein conserved in bacteria	907	non_syn	F->S	-	YbbR	-	-	-	-	-	-	-	-
4	AAK_5	AAK_5_4	AAK	k77_69565	27284	sub_A	2	no_sweep	0	AAK_g41664_21	in	UniRef100_A0A413PKS2	99.1	Histidine kinase	1146	non_syn	F->L	ko:K07718	HAMP,HATPase_c,His_kinase	-	-	-	-	-	-	-	-
4	AAK_5	AAK_5_5	AAK	k77_121123	12646	sub_T	3	no_sweep	0	AAK_g37883_14	in	UniRef100_C4Z9J9	100	Flp pilus assembly protein	858	non_syn	Mi->Li	ko:K02283	T2SSE	-	-	-	-	-	-	-	-
4	AAK_5	AAK_5_6	AAK	k77_69542	30451	sub_A	3	no_sweep	0	AAK_g40777_27	in	UniRef100_A0A412RH69	99.4	Aldose 1-epimerase	746	syn	H->H	ko:K01785	Aldose_epim	-	-	-	-	-	-	-	-
4	AAK_5	AAK_5_7	AAK	k77_69565	26941	sub_A	3	no_sweep	0	AAK_g41664_21	in	UniRef100_A0A413PKS2	99.1	Histidine kinase	1489	non_syn	P->Li	ko:K07718	HAMP,HATPase_c,His_kinase	-	-	-	-	-	-	-	-
4	AAK_5	AAK_5_8	AAK	k77_217714	5588	sub_G	5	no_sweep	0	-	-	-	-	-	-	-	-			-	-	-	-	-	-	-	-
4	AAK_5	AAK_5_9	AAK	k77_217714	5756	sub_G	5	no_sweep	0	-	-	-	-	-	-	-	-			-	-	-	-	-	-	-	-
4	AAK_5	AAK_5_10	AAK	k77_283349	16775	sub_A	5	no_sweep	0	AAK_g6536_17	in	UniRef100_C0EYV5	99.6	Uncharacterized protein	49	non_syn	T->Mi	-	DUF1847	-	-	-	-	-	-	-	-
4	AAK_5	AAK_5_11	AAK	k77_283349	16819	sub_T	5	no_sweep	0	AAK_g6536_17	in	UniRef100_C0EYV5	99.6	Uncharacterized protein	5	syn	A->A	-	DUF1847	-	-	-	-	-	-	-	-
4	AAK_5	AAK_5_12	AAK	k77_283349	16836	sub_C	5	no_sweep	0	AAK_g6536_17	upstream	UniRef100_C0EYV5	99.6	Uncharacterized protein	-12	undefined	undefined	-	DUF1847	-	-	-	-	-	-	-	-
4	AAK_5	AAK_5_13	AAK	k77_24293	578	sub_G	1	no_sweep	0	AAK_g53299_1	in	UniRef100_A0A413BKU6	99.4	Carbohydrate kinase	560	non_syn	V->Vi	ko:K00847	PfkB	-	-	-	-	-	-	-	-
5	AAK_6	AAK_6_1	AAK	k77_281946	19219	sub_A	3	no_sweep	83	AAK_g63448_18	in	UniRef100_A0A0K2HMM6	100	DNA gyrase subunit A	244	non_syn	S->F	ko:K02469	DNA_gyraseA_C,DNA_topoisoIV	-	-	-	-	-	-	-	-
5	AAK_6	AAK_6_2	AAK	k77_266535	56599	sub_G	3	no_sweep	0	AAK_g58312_36	in	UniRef100_D1K709	100	Uncharacterized protein	802	non_syn	Q->R	ko:K21557	-	-	-	-	-	-	-	-	-
5	AAK_6	AAK_6_3	AAK	k77_259754	71379	sub_T	3	no_sweep	0	AAK_g32776_44	in	UniRef100_A6L4H1	100	UDP-N-acetylglucosamine 2-epimerase	925	non_syn	A->V	ko:K01791,ko:K02851	Epimerase_2,Glycos_transf_4	-	-	-	-	-	-	-	-
5	AAK_6	AAK_6_4	AAK	k77_104680	37435	sub_T	12	no_sweep	0	AAK_g27022_32	upstream	UniRef100_I9R1S3	100	Glyco_trans_2-like domain-containing protein	-12	undefined	undefined	-	Glycos_transf_2	AAK_g27022_33	downstream	UniRef100_UPI000E530197	99.8	ABC transporter ATP-binding protein	1846	undefined	undefined	ko:K06147,ko:K11085	ABC_membrane,ABC_tran
5	AAK_6	AAK_6_5	AAK	k77_247896	47678	sub_C	12	no_sweep	0	AAK_g13363_45	in	UniRef100_D1K6F5	100	TonB-linked outer membrane protein, SusC/RagA family	1658	non_syn	K->N	-	CarbopepD_reg_2,Plug,TonB_dep_Rec	-	-	-	-	-	-	-	-
5	AAK_6	AAK_6_6	AAK	k77_259289	3843	sub_A	12	no_sweep	0	AAK_g26522_5	in	UniRef100_D1K8G7	100	ABC transporter, ATP-binding protein	118	non_syn	G->V	ko:K01990	ABC_tran	-	-	-	-	-	-	-	-
5	AAK_6	AAK_6_7	AAK	k77_259289	3852	sub_G	12	no_sweep	0	AAK_g26522_5	in	UniRef100_D1K8G7	100	ABC transporter, ATP-binding protein	109	non_syn	N->T	ko:K01990	ABC_tran	-	-	-	-	-	-	-	-
5	AAK_6	AAK_6_8	AAK	k77_259289	3857	sub_T	12	no_sweep	0	AAK_g26522_5	in	UniRef100_D1K8G7	100	ABC transporter, ATP-binding protein	104	syn	G->G	ko:K01990	ABC_tran	-	-	-	-	-	-	-	-
5	AAK_6	AAK_6_9	AAK	k77_259289	3874	sub_A	12	no_sweep	0	AAK_g26522_5	in	UniRef100_D1K8G7	100	ABC transporter, ATP-binding protein	87	non_syn	Mi->Li	ko:K01990	ABC_tran	-	-	-	-	-	-	-	-
5	AAK_6	AAK_6_10	AAK	k77_223326	125412	dangleLeft_k77_223326|+	12	no_sweep	0	AAK_g25403_67	in	UniRef100_A0A413GRS8	100	Sialate O-acetylesterase	545	unknown	unknown	ko:K05970	DUF4985,GHL10,SASA	-	-	-	-	-	-	-	-
5	AAK_6	AAK_6_11	AAK	k77_270687	83206	sub_A	12	no_sweep	0	AAK_g41231_64	in	UniRef100_D1JY78	100	Glycosyltransferase, group 2 family protein	483	syn	R->R	-	Glycos_transf_2	-	-	-	-	-	-	-	-
5	AAK_6	AAK_6_12	AAK	k77_95969	29071	sub_A	12	no_sweep	0	AAK_g40848_23	in	UniRef100_A0A4R4GQ73	99.8	Glycoside hydrolase family 97 protein	410	non_syn	Vi->V	-	GH97_C,GH97_N,Glyco_hydro_97	-	-	-	-	-	-	-	-
5	AAK_6	AAK_6_13	AAK	k77_95969	29074	sub_A	12	no_sweep	0	AAK_g40848_23	in	UniRef100_A0A4R4GQ73	99.8	Glycoside hydrolase family 97 protein	407	syn	Ii->Ii	-	GH97_C,GH97_N,Glyco_hydro_97	-	-	-	-	-	-	-	-
5	AAK_6	AAK_6_14	AAK	k77_95969	29088	sub_A	12	no_sweep	0	AAK_g40848_23	in	UniRef100_A0A4R4GQ73	99.8	Glycoside hydrolase family 97 protein	393	non_syn	D->Y	-	GH97_C,GH97_N,Glyco_hydro_97	-	-	-	-	-	-	-	-
5	AAK_6	AAK_6_15	AAK	k77_95969	29098	sub_T	12	no_sweep	0	AAK_g40848_23	in	UniRef100_A0A4R4GQ73	99.8	Glycoside hydrolase family 97 protein	383	syn	P->P	-	GH97_C,GH97_N,Glyco_hydro_97	-	-	-	-	-	-	-	-
5	AAK_6	AAK_6_16	AAK	k77_182706	456	sub_A	31	no_sweep	0	AAK_g39632_1	in	UniRef100_A0A4R4HY74	79.972	Peptidase domain-containing ABC transporter	1283	syn	S->S	ko:K20344	ABC_membrane,ABC_tran,Peptidase_C39	-	-	-	-	-	-	-	-
5	AAK_6	AAK_6_17	AAK	k77_182706	498	sub_A	31	no_sweep	0	AAK_g39632_1	in	UniRef100_A0A4R4HY74	79.972	Peptidase domain-containing ABC transporter	1241	syn	V->V	ko:K20344	ABC_membrane,ABC_tran,Peptidase_C39	-	-	-	-	-	-	-	-
5	AAK_6	AAK_6_18	AAK	k77_182706	509	sub_G	31	no_sweep	0	AAK_g39632_1	in	UniRef100_A0A4R4HY74	79.972	Peptidase domain-containing ABC transporter	1230	non_syn	Ii->L	ko:K20344	ABC_membrane,ABC_tran,Peptidase_C39	-	-	-	-	-	-	-	-
5	AAK_6	AAK_6_19	AAK	k77_182706	543	sub_T	31	no_sweep	0	AAK_g39632_1	in	UniRef100_A0A4R4HY74	79.972	Peptidase domain-containing ABC transporter	1196	syn	T->T	ko:K20344	ABC_membrane,ABC_tran,Peptidase_C39	-	-	-	-	-	-	-	-
5	AAK_6	AAK_6_20	AAK	k77_182706	561	sub_G	31	no_sweep	0	AAK_g39632_1	in	UniRef100_A0A4R4HY74	79.972	Peptidase domain-containing ABC transporter	1178	syn	G->G	ko:K20344	ABC_membrane,ABC_tran,Peptidase_C39	-	-	-	-	-	-	-	-
5	AAK_6	AAK_6_21	AAK	k77_182706	582	sub_A	31	no_sweep	0	AAK_g39632_1	in	UniRef100_A0A4R4HY74	79.972	Peptidase domain-containing ABC transporter	1157	syn	G->G	ko:K20344	ABC_membrane,ABC_tran,Peptidase_C39	-	-	-	-	-	-	-	-
5	AAK_6	AAK_6_22	AAK	k77_182706	588	sub_T	31	no_sweep	0	AAK_g39632_1	in	UniRef100_A0A4R4HY74	79.972	Peptidase domain-containing ABC transporter	1151	syn	Ii->Ii	ko:K20344	ABC_membrane,ABC_tran,Peptidase_C39	-	-	-	-	-	-	-	-
5	AAK_6	AAK_6_23	AAK	k77_182706	600	sub_T	31	no_sweep	0	AAK_g39632_1	in	UniRef100_A0A4R4HY74	79.972	Peptidase domain-containing ABC transporter	1139	syn	T->T	ko:K20344	ABC_membrane,ABC_tran,Peptidase_C39	-	-	-	-	-	-	-	-
5	AAK_6	AAK_6_24	AAK	k77_182706	621	sub_G	31	no_sweep	0	AAK_g39632_1	in	UniRef100_A0A4R4HY74	79.972	Peptidase domain-containing ABC transporter	1118	syn	F->F	ko:K20344	ABC_membrane,ABC_tran,Peptidase_C39	-	-	-	-	-	-	-	-
5	AAK_6	AAK_6_25	AAK	k77_182706	636	sub_C	31	no_sweep	0	AAK_g39632_1	in	UniRef100_A0A4R4HY74	79.972	Peptidase domain-containing ABC transporter	1103	syn	K->K	ko:K20344	ABC_membrane,ABC_tran,Peptidase_C39	-	-	-	-	-	-	-	-
5	AAK_6	AAK_6_26	AAK	k77_182706	645	sub_A	31	no_sweep	0	AAK_g39632_1	in	UniRef100_A0A4R4HY74	79.972	Peptidase domain-containing ABC transporter	1094	syn	A->A	ko:K20344	ABC_membrane,ABC_tran,Peptidase_C39	-	-	-	-	-	-	-	-
5	AAK_6	AAK_6_27	AAK	k77_182706	654	sub_T	31	no_sweep	0	AAK_g39632_1	in	UniRef100_A0A4R4HY74	79.972	Peptidase domain-containing ABC transporter	1085	syn	E->E	ko:K20344	ABC_membrane,ABC_tran,Peptidase_C39	-	-	-	-	-	-	-	-
5	AAK_6	AAK_6_28	AAK	k77_182706	696	sub_T	31	no_sweep	0	AAK_g39632_1	in	UniRef100_A0A4R4HY74	79.972	Peptidase domain-containing ABC transporter	1043	syn	E->E	ko:K20344	ABC_membrane,ABC_tran,Peptidase_C39	-	-	-	-	-	-	-	-
5	AAK_6	AAK_6_29	AAK	k77_182706	765	sub_G	31	no_sweep	0	AAK_g39632_1	in	UniRef100_A0A4R4HY74	79.972	Peptidase domain-containing ABC transporter	974	syn	N->N	ko:K20344	ABC_membrane,ABC_tran,Peptidase_C39	-	-	-	-	-	-	-	-
5	AAK_6	AAK_6_30	AAK	k77_182706	771	sub_C	31	no_sweep	0	AAK_g39632_1	in	UniRef100_A0A4R4HY74	79.972	Peptidase domain-containing ABC transporter	968	syn	G->G	ko:K20344	ABC_membrane,ABC_tran,Peptidase_C39	-	-	-	-	-	-	-	-
5	AAK_6	AAK_6_31	AAK	k77_182706	840	sub_A	31	no_sweep	0	AAK_g39632_1	in	UniRef100_A0A4R4HY74	79.972	Peptidase domain-containing ABC transporter	899	syn	F->F	ko:K20344	ABC_membrane,ABC_tran,Peptidase_C39	-	-	-	-	-	-	-	-
5	AAK_6	AAK_6_32	AAK	k77_182706	861	sub_A	31	no_sweep	0	AAK_g39632_1	in	UniRef100_A0A4R4HY74	79.972	Peptidase domain-containing ABC transporter	878	syn	V->V	ko:K20344	ABC_membrane,ABC_tran,Peptidase_C39	-	-	-	-	-	-	-	-
5	AAK_6	AAK_6_33	AAK	k77_182706	876	sub_G	31	no_sweep	0	AAK_g39632_1	in	UniRef100_A0A4R4HY74	79.972	Peptidase domain-containing ABC transporter	863	syn	N->N	ko:K20344	ABC_membrane,ABC_tran,Peptidase_C39	-	-	-	-	-	-	-	-
5	AAK_6	AAK_6_34	AAK	k77_182706	887	sub_A	31	no_sweep	0	AAK_g39632_1	in	UniRef100_A0A4R4HY74	79.972	Peptidase domain-containing ABC transporter	852	syn	Li->Li	ko:K20344	ABC_membrane,ABC_tran,Peptidase_C39	-	-	-	-	-	-	-	-
5	AAK_6	AAK_6_35	AAK	k77_182706	927	sub_T	31	no_sweep	0	AAK_g39632_1	in	UniRef100_A0A4R4HY74	79.972	Peptidase domain-containing ABC transporter	812	syn	A->A	ko:K20344	ABC_membrane,ABC_tran,Peptidase_C39	-	-	-	-	-	-	-	-
5	AAK_6	AAK_6_36	AAK	k77_182706	942	sub_C	31	no_sweep	0	AAK_g39632_1	in	UniRef100_A0A4R4HY74	79.972	Peptidase domain-containing ABC transporter	797	syn	S->S	ko:K20344	ABC_membrane,ABC_tran,Peptidase_C39	-	-	-	-	-	-	-	-
5	AAK_6	AAK_6_37	AAK	k77_182706	1094	sub_A	31	no_sweep	0	AAK_g39632_1	in	UniRef100_A0A4R4HY74	79.972	Peptidase domain-containing ABC transporter	645	syn	L->L	ko:K20344	ABC_membrane,ABC_tran,Peptidase_C39	-	-	-	-	-	-	-	-
5	AAK_6	AAK_6_38	AAK	k77_182706	1128	sub_A	31	no_sweep	0	AAK_g39632_1	in	UniRef100_A0A4R4HY74	79.972	Peptidase domain-containing ABC transporter	611	syn	L->L	ko:K20344	ABC_membrane,ABC_tran,Peptidase_C39	-	-	-	-	-	-	-	-
5	AAK_6	AAK_6_39	AAK	k77_182706	1131	sub_C	31	no_sweep	0	AAK_g39632_1	in	UniRef100_A0A4R4HY74	79.972	Peptidase domain-containing ABC transporter	608	non_syn	L->Li	ko:K20344	ABC_membrane,ABC_tran,Peptidase_C39	-	-	-	-	-	-	-	-
5	AAK_6	AAK_6_40	AAK	k77_182706	1188	sub_G	31	no_sweep	0	AAK_g39632_1	in	UniRef100_A0A4R4HY74	79.972	Peptidase domain-containing ABC transporter	551	syn	T->T	ko:K20344	ABC_membrane,ABC_tran,Peptidase_C39	-	-	-	-	-	-	-	-
5	AAK_6	AAK_6_41	AAK	k77_182706	1191	sub_A	31	no_sweep	0	AAK_g39632_1	in	UniRef100_A0A4R4HY74	79.972	Peptidase domain-containing ABC transporter	548	syn	S->S	ko:K20344	ABC_membrane,ABC_tran,Peptidase_C39	-	-	-	-	-	-	-	-
5	AAK_6	AAK_6_42	AAK	k77_182706	1197	sub_A	31	no_sweep	0	AAK_g39632_1	in	UniRef100_A0A4R4HY74	79.972	Peptidase domain-containing ABC transporter	542	syn	G->G	ko:K20344	ABC_membrane,ABC_tran,Peptidase_C39	-	-	-	-	-	-	-	-
5	AAK_6	AAK_6_43	AAK	k77_182706	1203	sub_G	31	no_sweep	0	AAK_g39632_1	in	UniRef100_A0A4R4HY74	79.972	Peptidase domain-containing ABC transporter	536	syn	Ii->Ii	ko:K20344	ABC_membrane,ABC_tran,Peptidase_C39	-	-	-	-	-	-	-	-
5	AAK_6	AAK_6_44	AAK	k77_182706	1206	sub_A	31	no_sweep	0	AAK_g39632_1	in	UniRef100_A0A4R4HY74	79.972	Peptidase domain-containing ABC transporter	533	syn	S->S	ko:K20344	ABC_membrane,ABC_tran,Peptidase_C39	-	-	-	-	-	-	-	-
5	AAK_6	AAK_6_45	AAK	k77_182706	1251	sub_A	31	no_sweep	0	AAK_g39632_1	in	UniRef100_A0A4R4HY74	79.972	Peptidase domain-containing ABC transporter	488	syn	H->H	ko:K20344	ABC_membrane,ABC_tran,Peptidase_C39	-	-	-	-	-	-	-	-
5	AAK_6	AAK_6_46	AAK	k77_182706	1413	sub_T	31	no_sweep	0	AAK_g39632_1	in	UniRef100_A0A4R4HY74	79.972	Peptidase domain-containing ABC transporter	326	syn	E->E	ko:K20344	ABC_membrane,ABC_tran,Peptidase_C39	-	-	-	-	-	-	-	-
5	AAK_6	AAK_6_47	AAK	k77_287110	3113	sub_T	4	no_sweep	0	AAK_g53655_4	in	UniRef100_D1K1F6	100	Type III restriction enzyme, res subunit	2441	non_syn	Li->L	ko:K01153	DUF4145,EcoEI_R_C,HSDR_N,HSDR_N_2,Helicase_C,ResIII	-	-	-	-	-	-	-	-
5	AAK_6	AAK_6_48	AAK	k77_287110	7638	sub_A	4	no_sweep	0	AAK_g53655_6	upstream	UniRef100_A0A0P0LKK9	100	Helix-turn-helix	-7	undefined	undefined	-	HTH_3	AAK_g53655_7	upstream	UniRef100_A0A1Q6ILF4	100	Calcineurin-like phosphoesterase	-262	undefined	undefined	-	Metallophos
5	AAK_6	AAK_6_49	AAK	k77_223326	110004	sub_C	4	no_sweep	0	AAK_g25403_59	in	UniRef100_UPI0005193C7A	99.8	DUF2264 domain-containing protein	859	non_syn	D->G	-	DUF2264,Glyco_hydro_16	-	-	-	-	-	-	-	-
5	AAK_6	AAK_6_50	AAK	k77_40157	88657	sub_A	4	no_sweep	0	AAK_g58888_80	in	UniRef100_D1K0V5	100	Response regulator receiver domain protein	737	non_syn	Li->L	ko:K11527	HATPase_c,HisKA,Response_reg	-	-	-	-	-	-	-	-
5	AAK_6	AAK_6_51	AAK	k77_287110	7599	sub_T	3	no_sweep	0	AAK_g53655_6	in	UniRef100_A0A0P0LKK9	100	Helix-turn-helix	32	non_syn	Li->L	-	HTH_3	-	-	-	-	-	-	-	-
5	AAK_6	AAK_6_52	AAK	k77_287110	7608	sub_T	3	no_sweep	0	AAK_g53655_6	in	UniRef100_A0A0P0LKK9	100	Helix-turn-helix	23	syn	A->A	-	HTH_3	-	-	-	-	-	-	-	-
5	AAK_6	AAK_6_53	AAK	k77_287110	7631	sub_T	3	no_sweep	0	AAK_g53655_6	in	UniRef100_A0A0P0LKK9	100	Helix-turn-helix	0	non_syn	Vi->Mi	-	HTH_3	-	-	-	-	-	-	-	-
5	AAK_6	AAK_6_54	AAK	k77_223326	6452	sub_C	4	no_sweep	0	AAK_g25403_4	in	UniRef100_A0A0K2HI20	100	PSP1 C-terminal domain-containing protein	1453	non_syn	N->T	-	PSP1	-	-	-	-	-	-	-	-
5	AAK_6	AAK_6_55	AAK	k77_287110	6095	sub_C	4	no_sweep	0	AAK_g53655_5	in	UniRef100_A0A0P0M4V6	100	DUF262 domain-containing protein	1265	syn	S->S	-	DUF1524,DUF262	-	-	-	-	-	-	-	-
5	AAK_6	AAK_6_56	AAK	k77_287110	6098	sub_A	4	no_sweep	0	AAK_g53655_5	in	UniRef100_A0A0P0M4V6	100	DUF262 domain-containing protein	1262	syn	F->F	-	DUF1524,DUF262	-	-	-	-	-	-	-	-
5	AAK_6	AAK_6_57	AAK	k77_39305	20712	sub_T	4	no_sweep	0	AAK_g46694_38	in	UniRef100_A0A4Q5HQU4	100	Uncharacterized protein	149	syn	G->G	-	-	-	-	-	-	-	-	-	-
6	AAK_7	AAK_7_1	AAK	k77_145229	7749	sub_C	19	no_sweep	0	AAK_g17266_10	in	UniRef100_R5H4T4	100	Uncharacterized protein	920	syn	E->E	ko:K02004	FtsX,MacB_PCD	-	-	-	-	-	-	-	-
6	AAK_7	AAK_7_2	AAK	k77_207540	35759	sub_G	19	no_sweep	0	AAK_g26604_31	in	UniRef100_R5H8G9	99.3	Sortase family protein	572	syn	Ii->Ii	-	Sortase	-	-	-	-	-	-	-	-
6	AAK_7	AAK_7_3	AAK	k77_207540	35762	sub_C	19	no_sweep	0	AAK_g26604_31	in	UniRef100_R5H8G9	99.3	Sortase family protein	569	syn	R->R	-	Sortase	-	-	-	-	-	-	-	-
6	AAK_7	AAK_7_4	AAK	k77_207540	35797	sub_A	19	no_sweep	0	AAK_g26604_31	in	UniRef100_R5H8G9	99.3	Sortase family protein	534	syn	L->L	-	Sortase	-	-	-	-	-	-	-	-
6	AAK_7	AAK_7_5	AAK	k77_207540	35800	sub_A	19	no_sweep	0	AAK_g26604_31	in	UniRef100_R5H8G9	99.3	Sortase family protein	531	syn	Li->Li	-	Sortase	-	-	-	-	-	-	-	-
6	AAK_7	AAK_7_6	AAK	k77_207540	35804	sub_A	19	no_sweep	0	AAK_g26604_31	in	UniRef100_R5H8G9	99.3	Sortase family protein	527	syn	A->A	-	Sortase	-	-	-	-	-	-	-	-
6	AAK_7	AAK_7_7	AAK	k77_207540	35805	sub_T	19	no_sweep	0	AAK_g26604_31	in	UniRef100_R5H8G9	99.3	Sortase family protein	526	non_syn	A->D	-	Sortase	-	-	-	-	-	-	-	-
6	AAK_7	AAK_7_8	AAK	k77_207540	36131	sub_T	19	no_sweep	0	AAK_g26604_31	in	UniRef100_R5H8G9	99.3	Sortase family protein	200	syn	E->E	-	Sortase	-	-	-	-	-	-	-	-
6	AAK_7	AAK_7_9	AAK	k77_278183	11726	sub_C	19	no_sweep	0	AAK_g4995_10	in	UniRef100_H1CAX1	98.2	AAA_31 domain-containing protein	47	syn	G->G	ko:K03496	AAA_31	-	-	-	-	-	-	-	-
6	AAK_7	AAK_7_10	AAK	k77_278183	11729	sub_T	19	no_sweep	0	AAK_g4995_10	in	UniRef100_H1CAX1	98.2	AAA_31 domain-containing protein	50	syn	T->T	ko:K03496	AAA_31	-	-	-	-	-	-	-	-
6	AAK_7	AAK_7_11	AAK	k77_278183	12044	sub_A	19	no_sweep	0	AAK_g4995_10	in	UniRef100_H1CAX1	98.2	AAA_31 domain-containing protein	365	syn	T->T	ko:K03496	AAA_31	-	-	-	-	-	-	-	-
6	AAK_7	AAK_7_12	AAK	k77_278183	12056	sub_T	19	no_sweep	0	AAK_g4995_10	in	UniRef100_H1CAX1	98.2	AAA_31 domain-containing protein	377	syn	N->N	ko:K03496	AAA_31	-	-	-	-	-	-	-	-
6	AAK_7	AAK_7_13	AAK	k77_145229	6791	sub_T	19	no_sweep	0	AAK_g17266_9	in	UniRef100_R5H0P7	99	Beta-galactosidase	572	syn	P->P	ko:K12308	Glyco_hydro_35	-	-	-	-	-	-	-	-
6	AAK_7	AAK_7_14	AAK	k77_145229	6794	sub_T	19	no_sweep	0	AAK_g17266_9	in	UniRef100_R5H0P7	99	Beta-galactosidase	569	non_syn	Vi->V	ko:K12308	Glyco_hydro_35	-	-	-	-	-	-	-	-
6	AAK_7	AAK_7_15	AAK	k77_197109	3402	sub_T	19	no_sweep	0	AAK_g20453_5	in	UniRef100_R5HDB3	100	GTP-binding protein TypA/BipA	638	syn	S->S	ko:K06207	EFG_C,EFG_II,GTP_EFTU,GTP_EFTU_D2	-	-	-	-	-	-	-	-
6	AAK_7	AAK_7_16	AAK	k77_197109	4524	sub_C	19	no_sweep	0	AAK_g20453_5	in	UniRef100_R5HDB3	100	GTP-binding protein TypA/BipA	1760	syn	P->P	ko:K06207	EFG_C,EFG_II,GTP_EFTU,GTP_EFTU_D2	-	-	-	-	-	-	-	-
6	AAK_7	AAK_7_17	AAK	k77_291062	8193	sub_T	19	no_sweep	0	AAK_g36434_9	in	UniRef100_A0A416CKP6	97	Uncharacterized protein	1948	non_syn	R->K	-	-	-	-	-	-	-	-	-	-
6	AAK_7	AAK_7_18	AAK	k77_291062	8210	sub_T	19	no_sweep	0	AAK_g36434_9	in	UniRef100_A0A416CKP6	97	Uncharacterized protein	1931	syn	G->G	-	-	-	-	-	-	-	-	-	-
6	AAK_7	AAK_7_19	AAK	k77_46892	432	sub_A	19	no_sweep	0	AAK_g8780_2	in	UniRef100_R5HCX5	100	Fructose-1,6-bisphosphatase class 3	1787	syn	S->S	ko:K04041	FBPase_2	-	-	-	-	-	-	-	-
6	AAK_7	AAK_7_20	AAK	k77_278183	11816	sub_T	38	no_sweep	0	AAK_g4995_10	in	UniRef100_H1CAX1	98.2	AAA_31 domain-containing protein	137	syn	A->A	ko:K03496	AAA_31	-	-	-	-	-	-	-	-
6	AAK_7	AAK_7_21	AAK	k77_278183	11840	sub_T	38	no_sweep	0	AAK_g4995_10	in	UniRef100_H1CAX1	98.2	AAA_31 domain-containing protein	161	syn	N->N	ko:K03496	AAA_31	-	-	-	-	-	-	-	-
6	AAK_7	AAK_7_22	AAK	k77_278183	11843	sub_C	38	no_sweep	0	AAK_g4995_10	in	UniRef100_H1CAX1	98.2	AAA_31 domain-containing protein	164	syn	P->P	ko:K03496	AAA_31	-	-	-	-	-	-	-	-
6	AAK_7	AAK_7_23	AAK	k77_278183	11845	sub_G	38	no_sweep	0	AAK_g4995_10	in	UniRef100_H1CAX1	98.2	AAA_31 domain-containing protein	166	non_syn	Y->C	ko:K03496	AAA_31	-	-	-	-	-	-	-	-
6	AAK_7	AAK_7_24	AAK	k77_278183	11846	sub_C	38	no_sweep	0	AAK_g4995_10	in	UniRef100_H1CAX1	98.2	AAA_31 domain-containing protein	167	syn	Y->Y	ko:K03496	AAA_31	-	-	-	-	-	-	-	-
6	AAK_7	AAK_7_25	AAK	k77_278183	11855	sub_T	38	no_sweep	0	AAK_g4995_10	in	UniRef100_H1CAX1	98.2	AAA_31 domain-containing protein	176	syn	D->D	ko:K03496	AAA_31	-	-	-	-	-	-	-	-
6	AAK_7	AAK_7_26	AAK	k77_278183	11993	sub_A	38	no_sweep	0	AAK_g4995_10	in	UniRef100_H1CAX1	98.2	AAA_31 domain-containing protein	314	syn	A->A	ko:K03496	AAA_31	-	-	-	-	-	-	-	-
6	AAK_7	AAK_7_27	AAK	k77_278183	12014	sub_G	38	no_sweep	0	AAK_g4995_10	in	UniRef100_H1CAX1	98.2	AAA_31 domain-containing protein	335	syn	R->R	ko:K03496	AAA_31	-	-	-	-	-	-	-	-
6	AAK_7	AAK_7_28	AAK	k77_278183	12065	sub_C	38	no_sweep	0	AAK_g4995_10	in	UniRef100_H1CAX1	98.2	AAA_31 domain-containing protein	386	syn	Y->Y	ko:K03496	AAA_31	-	-	-	-	-	-	-	-
6	AAK_7	AAK_7_29	AAK	k77_278183	12190	sub_G	38	no_sweep	0	AAK_g4995_10	in	UniRef100_H1CAX1	98.2	AAA_31 domain-containing protein	511	non_syn	E->G	ko:K03496	AAA_31	-	-	-	-	-	-	-	-
6	AAK_7	AAK_7_30	AAK	k77_278183	12194	sub_C	38	no_sweep	0	AAK_g4995_10	in	UniRef100_H1CAX1	98.2	AAA_31 domain-containing protein	515	syn	T->T	ko:K03496	AAA_31	-	-	-	-	-	-	-	-
6	AAK_7	AAK_7_31	AAK	k77_278183	12195	sub_A	38	no_sweep	0	AAK_g4995_10	in	UniRef100_H1CAX1	98.2	AAA_31 domain-containing protein	516	non_syn	V->Ii	ko:K03496	AAA_31	-	-	-	-	-	-	-	-
6	AAK_7	AAK_7_32	AAK	k77_278183	12203	sub_G	38	no_sweep	0	AAK_g4995_10	in	UniRef100_H1CAX1	98.2	AAA_31 domain-containing protein	524	syn	K->K	ko:K03496	AAA_31	-	-	-	-	-	-	-	-
6	AAK_7	AAK_7_33	AAK	k77_278183	12206	sub_C	38	no_sweep	0	AAK_g4995_10	in	UniRef100_H1CAX1	98.2	AAA_31 domain-containing protein	527	non_syn	Vi->V	ko:K03496	AAA_31	-	-	-	-	-	-	-	-
6	AAK_7	AAK_7_34	AAK	k77_278183	12209	sub_G	38	no_sweep	0	AAK_g4995_10	in	UniRef100_H1CAX1	98.2	AAA_31 domain-containing protein	530	syn	K->K	ko:K03496	AAA_31	-	-	-	-	-	-	-	-
6	AAK_7	AAK_7_35	AAK	k77_278183	12210	sub_A	38	no_sweep	0	AAK_g4995_10	in	UniRef100_H1CAX1	98.2	AAA_31 domain-containing protein	531	syn	R->R	ko:K03496	AAA_31	-	-	-	-	-	-	-	-
6	AAK_7	AAK_7_36	AAK	k77_278183	12215	sub_A	38	no_sweep	0	AAK_g4995_10	in	UniRef100_H1CAX1	98.2	AAA_31 domain-containing protein	536	syn	Q->Q	ko:K03496	AAA_31	-	-	-	-	-	-	-	-
6	AAK_7	AAK_7_37	AAK	k77_278183	16203	sub_T	38	no_sweep	0	AAK_g4995_16	in	UniRef100_A0A412Q354	97.295	Type IV secretory system conjugative DNA transfer family protein	749	syn	C->C	-	DUF4368,Recombinase,Resolvase,T4SS-DNA_transf,Zn_ribbon_recom	-	-	-	-	-	-	-	-
6	AAK_7	AAK_7_38	AAK	k77_88251	899	sub_T	38	no_sweep	0	AAK_g9280_1	upstream	UniRef100_A0A1C6KQ60	69.704	Uncharacterized protein	-48	undefined	undefined			AAK_g9280_2	downstream	UniRef100_A0A1C6LBE9	100	zinc_ribbon_2 domain-containing protein	1529	undefined	undefined	-	zinc_ribbon_2
6	AAK_7	AAK_7_39	AAK	k77_278183	9828	sub_C	38	no_sweep	0	AAK_g4995_8	downstream	UniRef100_A0A417LQ85	100	DUF3881 family protein	1448	undefined	undefined	-	DUF3881	AAK_g4995_9	upstream	UniRef100_H1CAX0	99.7	RepA_N domain-containing protein	-915	undefined	undefined	-	RepA_N
6	AAK_7	AAK_7_40	AAK	k77_278183	11510	sub_C	38	no_sweep	0	AAK_g4995_9	in	UniRef100_H1CAX0	99.7	RepA_N domain-containing protein	767	syn	T->T	-	RepA_N	-	-	-	-	-	-	-	-
6	AAK_7	AAK_7_41	AAK	k77_278183	14144	sub_A	38	no_sweep	0	AAK_g4995_13	in	UniRef100_A0A3E2NFP1	99.1	DUF3846 domain-containing protein	172	non_syn	G->E	-	DUF3846	-	-	-	-	-	-	-	-
6	AAK_7	AAK_7_42	AAK	k77_278183	14397	sub_T	38	no_sweep	0	AAK_g4995_13	in	UniRef100_A0A3E2NFP1	99.1	DUF3846 domain-containing protein	425	syn	F->F	-	DUF3846	-	-	-	-	-	-	-	-
6	AAK_7	AAK_7_43	AAK	k77_278183	14406	sub_G	38	no_sweep	0	AAK_g4995_13	in	UniRef100_A0A3E2NFP1	99.1	DUF3846 domain-containing protein	434	non_syn	V->Vi	-	DUF3846	-	-	-	-	-	-	-	-
6	AAK_7	AAK_7_44	AAK	k77_278183	15106	sub_C	38	no_sweep	0	AAK_g4995_15	in	UniRef100_A0A415NNC7	99.4	PcfB family protein	134	syn	D->D	-	DUF3801	-	-	-	-	-	-	-	-
6	AAK_7	AAK_7_45	AAK	k77_278183	15162	sub_C	38	no_sweep	0	AAK_g4995_15	in	UniRef100_A0A415NNC7	99.4	PcfB family protein	190	non_syn	V->A	-	DUF3801	-	-	-	-	-	-	-	-
6	AAK_7	AAK_7_46	AAK	k77_321622	6216	sub_C	38	no_sweep	0	AAK_g36218_9	in	UniRef100_A0A413I3W5	99.3	BREX system P-loop protein BrxC	770	syn	H->H	-	-	-	-	-	-	-	-	-	-
6	AAK_7	AAK_7_47	AAK	k77_321622	6225	sub_T	38	no_sweep	0	AAK_g36218_9	in	UniRef100_A0A413I3W5	99.3	BREX system P-loop protein BrxC	779	syn	V->V	-	-	-	-	-	-	-	-	-	-
6	AAK_7	AAK_7_48	AAK	k77_321622	7716	sub_C	38	no_sweep	0	AAK_g36218_9	in	UniRef100_A0A413I3W5	99.3	BREX system P-loop protein BrxC	2270	syn	Ii->Ii	-	-	-	-	-	-	-	-	-	-
6	AAK_7	AAK_7_49	AAK	k77_321622	7740	sub_C	38	no_sweep	0	AAK_g36218_9	in	UniRef100_A0A413I3W5	99.3	BREX system P-loop protein BrxC	2294	syn	N->N	-	-	-	-	-	-	-	-	-	-
6	AAK_7	AAK_7_50	AAK	k77_321622	7773	sub_A	38	no_sweep	0	AAK_g36218_9	in	UniRef100_A0A413I3W5	99.3	BREX system P-loop protein BrxC	2327	syn	E->E	-	-	-	-	-	-	-	-	-	-
6	AAK_7	AAK_7_51	AAK	k77_321622	7782	sub_T	38	no_sweep	0	AAK_g36218_9	in	UniRef100_A0A413I3W5	99.3	BREX system P-loop protein BrxC	2336	syn	V->V	-	-	-	-	-	-	-	-	-	-
6	AAK_7	AAK_7_52	AAK	k77_321622	7789	sub_C	38	no_sweep	0	AAK_g36218_9	in	UniRef100_A0A413I3W5	99.3	BREX system P-loop protein BrxC	2343	syn	Li->Li	-	-	-	-	-	-	-	-	-	-
6	AAK_7	AAK_7_53	AAK	k77_321622	7815	sub_A	38	no_sweep	0	AAK_g36218_9	in	UniRef100_A0A413I3W5	99.3	BREX system P-loop protein BrxC	2369	syn	A->A	-	-	-	-	-	-	-	-	-	-
6	AAK_7	AAK_7_54	AAK	k77_321622	15205	sub_G	38	no_sweep	0	AAK_g36218_14	in	UniRef100_A0A417GJK4	98.9	BREX-1 system phosphatase PglZ type A	1322	non_syn	D->E	-	PglZ	-	-	-	-	-	-	-	-
6	AAK_7	AAK_7_55	AAK	k77_321622	15343	sub_A	38	no_sweep	0	AAK_g36218_14	in	UniRef100_A0A417GJK4	98.9	BREX-1 system phosphatase PglZ type A	1460	syn	Q->Q	-	PglZ	-	-	-	-	-	-	-	-
6	AAK_7	AAK_7_56	AAK	k77_321622	15344	sub_C	38	no_sweep	0	AAK_g36218_14	in	UniRef100_A0A417GJK4	98.9	BREX-1 system phosphatase PglZ type A	1461	syn	Li->Li	-	PglZ	-	-	-	-	-	-	-	-
6	AAK_7	AAK_7_57	AAK	k77_88251	234	sub_C	38	no_sweep	0	AAK_g9280_1	in	UniRef100_A0A1C6KQ60	69.704	Uncharacterized protein	617	syn	K->K			-	-	-	-	-	-	-	-
6	AAK_7	AAK_7_58	AAK	k77_278183	11987	sub_A	3	no_sweep	0	AAK_g4995_10	in	UniRef100_H1CAX1	98.2	AAA_31 domain-containing protein	308	syn	E->E	ko:K03496	AAA_31	-	-	-	-	-	-	-	-
6	AAK_7	AAK_7_59	AAK	k77_278183	11990	sub_T	3	no_sweep	0	AAK_g4995_10	in	UniRef100_H1CAX1	98.2	AAA_31 domain-containing protein	311	syn	V->V	ko:K03496	AAA_31	-	-	-	-	-	-	-	-
6	AAK_7	AAK_7_60	AAK	k77_212533	5772	sub_C	3	no_sweep	0	AAK_g22957_2	in	UniRef100_A0A1C5R6T4	91.8	Endo-1,4-beta-xylanase A	5378	syn	D->D	-	Big_2,CW_binding_1,SLH	-	-	-	-	-	-	-	-
7	AAK_8	AAK_8_1	AAK	k77_11427	2535	sub_G	5	no_sweep	151	AAK_g16579_2	in	UniRef100_A0A3A6K4F5	82.532	SAM-dependent DNA methyltransferase	578	syn	T->T	ko:K03427	HsdM_N,N6_Mtase	-	-	-	-	-	-	-	-
7	AAK_8	AAK_8_2	AAK	k77_242227	6915	sub_C	5	no_sweep	0	AAK_g6650_4	in	UniRef100_A0A3R6UK70	99.7	EVE domain-containing protein	2701	non_syn	Vi->A	ko:K07452	-	-	-	-	-	-	-	-	-
7	AAK_8	AAK_8_3	AAK	k77_242227	6917	sub_G	5	no_sweep	0	AAK_g6650_4	in	UniRef100_A0A3R6UK70	99.7	EVE domain-containing protein	2703	non_syn	N->D	ko:K07452	-	-	-	-	-	-	-	-	-
7	AAK_8	AAK_8_4	AAK	k77_242227	6921	sub_G	5	no_sweep	0	AAK_g6650_4	in	UniRef100_A0A3R6UK70	99.7	EVE domain-containing protein	2707	non_syn	D->G	ko:K07452	-	-	-	-	-	-	-	-	-
7	AAK_8	AAK_8_5	AAK	k77_242227	6926	sub_A	5	no_sweep	0	AAK_g6650_4	in	UniRef100_A0A3R6UK70	99.7	EVE domain-containing protein	2712	non_syn	A->T	ko:K07452	-	-	-	-	-	-	-	-	-
7	AAK_8	AAK_8_6	AAK	k77_182173	7545	sub_T	4	no_sweep	0	AAK_g31862_7	in	UniRef100_A0A355W0U1	99	Acyl_transf_3 domain-containing protein	893	non_syn	F->L	-	Acyl_transf_3	-	-	-	-	-	-	-	-
7	AAK_8	AAK_8_7	AAK	k77_173344	13837	sub_T	4	no_sweep	0	AAK_g61056_14	in	UniRef100_A0A417EMK9	97.772	Uncharacterized protein	252	non_syn	Li->Mi	-	HCBP_related,HemolysinCabind	-	-	-	-	-	-	-	-
7	AAK_8	AAK_8_8	AAK	k77_271104	1094	sub_A	4	no_sweep	0	AAK_g48334_2	in	UniRef100_A0A355W129	100	Uncharacterized protein	133	non_syn	A->E			-	-	-	-	-	-	-	-
7	AAK_8	AAK_8_9	AAK	k77_271104	1104	sub_T	4	no_sweep	0	AAK_g48334_2	in	UniRef100_A0A355W129	100	Uncharacterized protein	143	syn	T->T			-	-	-	-	-	-	-	-
7	AAK_8	AAK_8_10	AAK	k77_320001	3822	sub_T	4	no_sweep	0	AAK_g14372_2	in	UniRef100_R6EX95	48.415	DNA-directed RNA polymerase subunit beta	456	non_syn	R->S	ko:K03043	RNA_pol_Rpb2_1,RNA_pol_Rpb2_2,RNA_pol_Rpb2_3,RNA_pol_Rpb2_45,RNA_pol_Rpb2_6,RNA_pol_Rpb2_7	-	-	-	-	-	-	-	-
7	AAK_8	AAK_8_11	AAK	k77_320001	3823	sub_A	4	no_sweep	0	AAK_g14372_2	in	UniRef100_R6EX95	48.415	DNA-directed RNA polymerase subunit beta	455	syn	V->V	ko:K03043	RNA_pol_Rpb2_1,RNA_pol_Rpb2_2,RNA_pol_Rpb2_3,RNA_pol_Rpb2_45,RNA_pol_Rpb2_6,RNA_pol_Rpb2_7	-	-	-	-	-	-	-	-
7	AAK_8	AAK_8_12	AAK	k77_320001	3841	sub_G	4	no_sweep	0	AAK_g14372_2	in	UniRef100_R6EX95	48.415	DNA-directed RNA polymerase subunit beta	437	non_syn	Li->L	ko:K03043	RNA_pol_Rpb2_1,RNA_pol_Rpb2_2,RNA_pol_Rpb2_3,RNA_pol_Rpb2_45,RNA_pol_Rpb2_6,RNA_pol_Rpb2_7	-	-	-	-	-	-	-	-
7	AAK_8	AAK_8_13	AAK	k77_189071	1988	sub_T	4	no_sweep	0	-	-	-	-	-	-	-	-			-	-	-	-	-	-	-	-
7	AAK_8	AAK_8_14	AAK	k77_189071	1742	sub_T	6	no_sweep	0	-	-	-	-	-	-	-	-			-	-	-	-	-	-	-	-
7	AAK_8	AAK_8_15	AAK	k77_189071	1771	sub_C	6	no_sweep	0	-	-	-	-	-	-	-	-			-	-	-	-	-	-	-	-
7	AAK_8	AAK_8_16	AAK	k77_189071	1975	sub_T	6	no_sweep	0	-	-	-	-	-	-	-	-			-	-	-	-	-	-	-	-
7	AAK_8	AAK_8_17	AAK	k77_189071	1989	sub_G	6	no_sweep	0	-	-	-	-	-	-	-	-			-	-	-	-	-	-	-	-
7	AAK_8	AAK_8_18	AAK	k77_189071	1994	sub_T	6	no_sweep	0	-	-	-	-	-	-	-	-			-	-	-	-	-	-	-	-
7	AAK_8	AAK_8_19	AAK	k77_189071	2000	sub_T	6	no_sweep	0	-	-	-	-	-	-	-	-			-	-	-	-	-	-	-	-
7	AAK_8	AAK_8_20	AAK	k77_287721	7884	sub_T	1	no_sweep	0	AAK_g65019_7	in	UniRef100_A0A3R6SYB9	99.9	Histidine kinase	371	non_syn	D->E	-	HATPase_c,HisKA	-	-	-	-	-	-	-	-
8	AAK_9	AAK_9_1	AAK	k77_278723	2028	del_1	1	no_sweep	0	AAK_g13726_3	in	UniRef100_U6R8E3	100	Uncharacterized protein	680	unknown	unknown	-	DUF4974,FecR	-	-	-	-	-	-	-	-
8	AAK_9	AAK_9_2	AAK	k77_178326	5016	sub_G	4	no_sweep	0	AAK_g49943_6	in	UniRef100_UPI000E42B180	99.8	ABC transporter permease	15	non_syn	F->V	ko:K01992	ABC2_membrane_3	-	-	-	-	-	-	-	-
8	AAK_9	AAK_9_3	AAK	k77_257407	16077	sub_T	4	no_sweep	0	AAK_g2411_13	in	UniRef100_U6RK38	100	Uncharacterized protein	1390	non_syn	D->V	-	TPR_1,TPR_16,TPR_19,TPR_2,TPR_6,TPR_7,TPR_8	-	-	-	-	-	-	-	-
8	AAK_9	AAK_9_4	AAK	k77_257407	16081	sub_T	4	no_sweep	0	AAK_g2411_13	in	UniRef100_U6RK38	100	Uncharacterized protein	1394	syn	A->A	-	TPR_1,TPR_16,TPR_19,TPR_2,TPR_6,TPR_7,TPR_8	-	-	-	-	-	-	-	-
8	AAK_9	AAK_9_5	AAK	k77_40940	4849	sub_A	4	no_sweep	0	AAK_g68454_7	in	UniRef100_U6RAV9	100	SUI1 domain-containing protein	358	non_syn	T->K	ko:K03113	SUI1	-	-	-	-	-	-	-	-
8	AAK_9	AAK_9_6	AAK	k77_269952	277	sub_A	1	no_sweep	0	AAK_g30911_1	in	UniRef100_A0A3R6FSR4	45.487	Bifunctional DNA primase/helicase (Fragment)	316	non_syn	T->Ii	-	AAA_25,Toprim_2,Toprim_4	-	-	-	-	-	-	-	-
9	AAK_10	AAK_10_1	AAK	k77_249312	8680	sub_A	1	no_sweep	0	AAK_g32414_5	in	UniRef100_A0A3D5NKL5	98.1	Uncharacterized protein	72	non_syn	A->S	ko:K02004	FtsX,MacB_PCD	-	-	-	-	-	-	-	-
9	AAK_10	AAK_10_2	AAK	k77_293696	1666	sub_T	1	no_sweep	0	AAK_g5786_1	downstream	UniRef100_R6NX91	99.2	Septum formation inhibitor-activating ATPase	756	undefined	undefined	ko:K03609	AAA_31,CbiA	AAK_g5786_2	upstream	UniRef100_R6MRP0	100	Methylglyoxal synthase	-15	undefined	undefined	ko:K01734	MGS
10	AAK_11	AAK_11_1	AAK	k77_241903	17840	sub_A	4	no_sweep	0	AAK_g1949_14	in	UniRef100_R5F5E6	99.5	Uncharacterized protein	502	non_syn	Q->Li	-	NigD_C,NigD_N	-	-	-	-	-	-	-	-
10	AAK_11	AAK_11_2	AAK	k77_241903	17848	sub_A	4	no_sweep	0	AAK_g1949_14	in	UniRef100_R5F5E6	99.5	Uncharacterized protein	494	non_syn	Li->F	-	NigD_C,NigD_N	-	-	-	-	-	-	-	-
10	AAK_11	AAK_11_3	AAK	k77_322702	94993	sub_T	4	no_sweep	0	AAK_g50094_56	in	UniRef100_K0XMY5	100	Uncharacterized protein	709	non_syn	T->N	ko:K01297	Peptidase_S66	-	-	-	-	-	-	-	-
10	AAK_11	AAK_11_4	AAK	k77_68884	119214	sub_T	4	no_sweep	0	AAK_g31009_87	upstream	UniRef100_K0XR49	99.5	Por secretion system C-terminal sorting domain-containing protein	-382	undefined	undefined	-	Big_2,DUF3047,DUF4983,Hemopexin,Laminin_G_3,Metallophos,PA14,PglZ,Phosphodiest,SLH	-	-	-	-	-	-	-	-
10	AAK_11	AAK_11_5	AAK	k77_56766	9528	sub_A	4	no_sweep	0	AAK_g3448_13	in	UniRef100_A0A496DD73	94.9	Mobilization protein	620	syn	G->G	-	Relaxase	-	-	-	-	-	-	-	-
10	AAK_11	AAK_11_6	AAK	k77_56766	9535	sub_C	4	no_sweep	0	AAK_g3448_13	in	UniRef100_A0A496DD73	94.9	Mobilization protein	627	non_syn	E->Q	-	Relaxase	-	-	-	-	-	-	-	-
10	AAK_11	AAK_11_7	AAK	k77_56766	9556	sub_G	4	no_sweep	0	AAK_g3448_13	in	UniRef100_A0A496DD73	94.9	Mobilization protein	648	non_syn	N->D	-	Relaxase	-	-	-	-	-	-	-	-
10	AAK_11	AAK_11_8	AAK	k77_65815	16612	sub_T	4	no_sweep	0	AAK_g58900_19	in	UniRef100_UPI000E52C5DF	82.659	site-specific integrase	18	syn	Li->Li	-	Arm-DNA-bind_5,Phage_int_SAM_5,Phage_integrase	-	-	-	-	-	-	-	-
11	AAK_12	AAK_12_1	AAK	k77_184191	15423	sub_A	1	no_sweep	0	AAK_g57738_18	in	UniRef100_A0A3D2ALD5	99.9	Single-stranded-DNA-specific exonuclease RecJ	995	syn	A->A	ko:K07462	DHH,DHHA1	-	-	-	-	-	-	-	-
11	AAK_12	AAK_12_2	AAK	k77_227329	4853	sub_T	1	no_sweep	0	AAK_g13061_4	in	UniRef100_D1PJ71	79.6	Phosphopantetheine adenylyltransferase	159	syn	Li->Li	ko:K00954	CTP_transf_like	-	-	-	-	-	-	-	-
11	AAK_12	AAK_12_3	AAK	k77_231557	2114	sub_A	1	no_sweep	0	AAK_g359_3	in	UniRef100_A0A367G2F3	98.3	Uncharacterized protein	199	non_syn	A->E	-	-	-	-	-	-	-	-	-	-
12	AAK_13	AAK_13_1	AAK	k77_249974	28000	sub_A	2	no_sweep	0	AAK_g41583_25	in	UniRef100_A0A139TRL0	94.5	Uncharacterized protein	490	non_syn	S->Y	-	-	-	-	-	-	-	-	-	-
12	AAK_13	AAK_13_2	AAK	k77_31671	116447	sub_C	2	no_sweep	0	AAK_g13578_91	in	UniRef100_A0A139TPU1	99.6	Tetratricopeptide repeat protein	353	non_syn	K->N	ko:K02453	Secretin	-	-	-	-	-	-	-	-
13	AAK_14	AAK_14_1	AAK	k77_121979	66774	sub_C	50	no_sweep	0	AAK_g57607_67	in	UniRef100_A0A2U1CCY8	100	UDP-N-acetylglucosamine--N-acetylmuramyl-(pentapeptide) pyrophosphoryl-undecaprenol N-acetylglucosamine transferase	476	syn	P->P	ko:K02563	Glyco_tran_28_C,Glyco_transf_28	-	-	-	-	-	-	-	-
13	AAK_14	AAK_14_2	AAK	k77_164781	10106	sub_T	50	no_sweep	0	AAK_g1568_10	in	UniRef100_A0A2U1BJ22	100	TetR family transcriptional regulator	324	syn	Li->Li	-	TetR_N	-	-	-	-	-	-	-	-
13	AAK_14	AAK_14_3	AAK	k77_164781	13867	sub_A	50	no_sweep	0	AAK_g1568_13	in	UniRef100_A0A1C6H5A6	100	Endo-1,4-beta-xylanase A	2479	non_syn	S->N	-	Big_3_5,CW_binding_1,Flg_new,SLH	-	-	-	-	-	-	-	-
13	AAK_14	AAK_14_4	AAK	k77_164781	16538	sub_G	50	no_sweep	0	AAK_g1568_13	in	UniRef100_A0A1C6H5A6	100	Endo-1,4-beta-xylanase A	5150	syn	R->R	-	Big_3_5,CW_binding_1,Flg_new,SLH	-	-	-	-	-	-	-	-
13	AAK_14	AAK_14_5	AAK	k77_164781	16539	sub_C	50	no_sweep	0	AAK_g1568_13	in	UniRef100_A0A1C6H5A6	100	Endo-1,4-beta-xylanase A	5151	non_syn	E->Q	-	Big_3_5,CW_binding_1,Flg_new,SLH	-	-	-	-	-	-	-	-
13	AAK_14	AAK_14_6	AAK	k77_164781	16541	sub_G	50	no_sweep	0	AAK_g1568_13	in	UniRef100_A0A1C6H5A6	100	Endo-1,4-beta-xylanase A	5153	syn	E->E	-	Big_3_5,CW_binding_1,Flg_new,SLH	-	-	-	-	-	-	-	-
13	AAK_14	AAK_14_7	AAK	k77_164781	16547	sub_T	50	no_sweep	0	AAK_g1568_13	in	UniRef100_A0A1C6H5A6	100	Endo-1,4-beta-xylanase A	5159	syn	N->N	-	Big_3_5,CW_binding_1,Flg_new,SLH	-	-	-	-	-	-	-	-
13	AAK_14	AAK_14_8	AAK	k77_164781	17478	sub_G	50	no_sweep	0	AAK_g1568_13	in	UniRef100_A0A1C6H5A6	100	Endo-1,4-beta-xylanase A	6090	non_syn	N->D	-	Big_3_5,CW_binding_1,Flg_new,SLH	-	-	-	-	-	-	-	-
13	AAK_14	AAK_14_9	AAK	k77_164781	17535	sub_A	50	no_sweep	0	AAK_g1568_13	in	UniRef100_A0A1C6H5A6	100	Endo-1,4-beta-xylanase A	6147	non_syn	E->K	-	Big_3_5,CW_binding_1,Flg_new,SLH	-	-	-	-	-	-	-	-
13	AAK_14	AAK_14_10	AAK	k77_164781	17552	sub_T	50	no_sweep	0	AAK_g1568_13	in	UniRef100_A0A1C6H5A6	100	Endo-1,4-beta-xylanase A	6164	syn	D->D	-	Big_3_5,CW_binding_1,Flg_new,SLH	-	-	-	-	-	-	-	-
13	AAK_14	AAK_14_11	AAK	k77_164781	20937	sub_G	50	no_sweep	0	AAK_g1568_13	in	UniRef100_A0A1C6H5A6	100	Endo-1,4-beta-xylanase A	9549	non_syn	N->D	-	Big_3_5,CW_binding_1,Flg_new,SLH	-	-	-	-	-	-	-	-
13	AAK_14	AAK_14_12	AAK	k77_164781	20993	sub_G	50	no_sweep	0	AAK_g1568_13	in	UniRef100_A0A1C6H5A6	100	Endo-1,4-beta-xylanase A	9605	syn	A->A	-	Big_3_5,CW_binding_1,Flg_new,SLH	-	-	-	-	-	-	-	-
13	AAK_14	AAK_14_13	AAK	k77_164781	21023	sub_C	50	no_sweep	0	AAK_g1568_13	in	UniRef100_A0A1C6H5A6	100	Endo-1,4-beta-xylanase A	9635	syn	G->G	-	Big_3_5,CW_binding_1,Flg_new,SLH	-	-	-	-	-	-	-	-
13	AAK_14	AAK_14_14	AAK	k77_164781	22929	sub_G	50	no_sweep	0	AAK_g1568_13	in	UniRef100_A0A1C6H5A6	100	Endo-1,4-beta-xylanase A	11541	non_syn	S->A	-	Big_3_5,CW_binding_1,Flg_new,SLH	-	-	-	-	-	-	-	-
13	AAK_14	AAK_14_15	AAK	k77_164781	22934	sub_G	50	no_sweep	0	AAK_g1568_13	in	UniRef100_A0A1C6H5A6	100	Endo-1,4-beta-xylanase A	11546	non_syn	Ii->Mi	-	Big_3_5,CW_binding_1,Flg_new,SLH	-	-	-	-	-	-	-	-
13	AAK_14	AAK_14_16	AAK	k77_18035	2761	sub_T	50	no_sweep	0	AAK_g36844_5	in	UniRef100_A0A0S2W862	100	V-type ATP synthase subunit K	29	syn	G->G	ko:K02124	ATP-synt_C	-	-	-	-	-	-	-	-
13	AAK_14	AAK_14_17	AAK	k77_30233	5828	ins_CGC	50	no_sweep	0	AAK_g62993_4	in	UniRef100_A0A2U1CGA2	91.612	Protein translocase subunit SecA	2412	unknown	unknown	ko:K03070	Helicase_C,SEC-C,SecA_DEAD,SecA_PP_bind,SecA_SW	-	-	-	-	-	-	-	-
13	AAK_14	AAK_14_18	AAK	k77_133303	10468	ins_T	50	no_sweep	0	AAK_g67390_17	upstream	UniRef100_A0A0S2W3Z2	100	Hybrid cluster-associated redox disulfide protein	-4	undefined	undefined	-	DUF1858	-	-	-	-	-	-	-	-
13	AAK_14	AAK_14_19	AAK	k77_142333	1242	sub_T	50	no_sweep	0	AAK_g49129_3	in	UniRef100_A0A1Y3SPI2	100	Copper resistance protein CopZ	92	syn	K->K	-	HMA	-	-	-	-	-	-	-	-
13	AAK_14	AAK_14_20	AAK	k77_142333	1254	sub_G	50	no_sweep	0	AAK_g49129_3	in	UniRef100_A0A1Y3SPI2	100	Copper resistance protein CopZ	80	syn	A->A	-	HMA	-	-	-	-	-	-	-	-
13	AAK_14	AAK_14_21	AAK	k77_144151	1708	sub_C	50	no_sweep	0	-	-	-	-	-	-	-	-			-	-	-	-	-	-	-	-
13	AAK_14	AAK_14_22	AAK	k77_144151	2047	sub_C	50	no_sweep	0	-	-	-	-	-	-	-	-			-	-	-	-	-	-	-	-
13	AAK_14	AAK_14_23	AAK	k77_163985	6780	sub_C	50	no_sweep	0	-	-	-	-	-	-	-	-			-	-	-	-	-	-	-	-
13	AAK_14	AAK_14_24	AAK	k77_163985	6788	sub_G	50	no_sweep	0	-	-	-	-	-	-	-	-			-	-	-	-	-	-	-	-
13	AAK_14	AAK_14_25	AAK	k77_164781	24074	sub_T	50	no_sweep	0	AAK_g1568_14	in	UniRef100_A0A1C6H4P5	99.5	Subtilisin DY	161	non_syn	E->D	-	Metallophos	-	-	-	-	-	-	-	-
13	AAK_14	AAK_14_26	AAK	k77_164781	24098	sub_C	50	no_sweep	0	AAK_g1568_14	in	UniRef100_A0A1C6H4P5	99.5	Subtilisin DY	185	syn	Ii->Ii	-	Metallophos	-	-	-	-	-	-	-	-
13	AAK_14	AAK_14_27	AAK	k77_164781	24474	sub_G	50	no_sweep	0	AAK_g1568_14	in	UniRef100_A0A1C6H4P5	99.5	Subtilisin DY	561	non_syn	Ii->V	-	Metallophos	-	-	-	-	-	-	-	-
13	AAK_14	AAK_14_28	AAK	k77_164781	24809	sub_C	50	no_sweep	0	AAK_g1568_14	in	UniRef100_A0A1C6H4P5	99.5	Subtilisin DY	896	syn	G->G	-	Metallophos	-	-	-	-	-	-	-	-
13	AAK_14	AAK_14_29	AAK	k77_164781	24824	sub_C	50	no_sweep	0	AAK_g1568_14	in	UniRef100_A0A1C6H4P5	99.5	Subtilisin DY	911	syn	D->D	-	Metallophos	-	-	-	-	-	-	-	-
13	AAK_14	AAK_14_30	AAK	k77_164781	24825	sub_A	50	no_sweep	0	AAK_g1568_14	in	UniRef100_A0A1C6H4P5	99.5	Subtilisin DY	912	non_syn	G->S	-	Metallophos	-	-	-	-	-	-	-	-
13	AAK_14	AAK_14_31	AAK	k77_21808	9656	sub_A	50	no_sweep	0	-	-	-	-	-	-	-	-			-	-	-	-	-	-	-	-
13	AAK_14	AAK_14_32	AAK	k77_21808	9671	sub_A	50	no_sweep	0	-	-	-	-	-	-	-	-			-	-	-	-	-	-	-	-
13	AAK_14	AAK_14_33	AAK	k77_21808	9674	sub_G	50	no_sweep	0	-	-	-	-	-	-	-	-			-	-	-	-	-	-	-	-
13	AAK_14	AAK_14_34	AAK	k77_21808	9749	sub_G	50	no_sweep	0	-	-	-	-	-	-	-	-			-	-	-	-	-	-	-	-
13	AAK_14	AAK_14_35	AAK	k77_21808	9755	sub_C	50	no_sweep	0	-	-	-	-	-	-	-	-			-	-	-	-	-	-	-	-
13	AAK_14	AAK_14_36	AAK	k77_21808	9758	sub_C	50	no_sweep	0	-	-	-	-	-	-	-	-			-	-	-	-	-	-	-	-
13	AAK_14	AAK_14_37	AAK	k77_21808	9764	sub_G	50	no_sweep	0	-	-	-	-	-	-	-	-			-	-	-	-	-	-	-	-
13	AAK_14	AAK_14_38	AAK	k77_262563	17574	sub_G	50	no_sweep	0	AAK_g2391_16	in	UniRef100_A0A2U1CGP7	100	Phosphotransacetylase	275	syn	P->P	ko:K00625	PTA_PTB	-	-	-	-	-	-	-	-
13	AAK_14	AAK_14_39	AAK	k77_296737	1347	sub_G	50	no_sweep	0	-	-	-	-	-	-	-	-			-	-	-	-	-	-	-	-
13	AAK_14	AAK_14_40	AAK	k77_296737	1380	sub_G	50	no_sweep	0	-	-	-	-	-	-	-	-			-	-	-	-	-	-	-	-
13	AAK_14	AAK_14_41	AAK	k77_296737	1392	sub_G	50	no_sweep	0	-	-	-	-	-	-	-	-			-	-	-	-	-	-	-	-
13	AAK_14	AAK_14_42	AAK	k77_30473	78794	sub_T	50	no_sweep	0	AAK_g66468_89	in	UniRef100_A0A1Y4SAI3	99.3	Uncharacterized protein	92	syn	A->A	-	-	-	-	-	-	-	-	-	-
13	AAK_14	AAK_14_43	AAK	k77_308961	6797	sub_T	50	no_sweep	0	-	-	-	-	-	-	-	-			-	-	-	-	-	-	-	-
13	AAK_14	AAK_14_44	AAK	k77_308961	6798	sub_T	50	no_sweep	0	-	-	-	-	-	-	-	-			-	-	-	-	-	-	-	-
13	AAK_14	AAK_14_45	AAK	k77_68975	84750	sub_T	50	no_sweep	0	AAK_g32689_88	in	UniRef100_UPI00051C386C	100	ABC transporter ATP-binding protein	308	syn	S->S	ko:K10823	ABC_tran,oligo_HPY	-	-	-	-	-	-	-	-
13	AAK_14	AAK_14_46	AAK	k77_72405	4207	sub_A	50	no_sweep	0	-	-	-	-	-	-	-	-			-	-	-	-	-	-	-	-
13	AAK_14	AAK_14_47	AAK	k77_72405	5208	sub_G	50	no_sweep	0	-	-	-	-	-	-	-	-			-	-	-	-	-	-	-	-
13	AAK_14	AAK_14_48	AAK	k77_72405	5209	sub_T	50	no_sweep	0	-	-	-	-	-	-	-	-			-	-	-	-	-	-	-	-
13	AAK_14	AAK_14_49	AAK	k77_7972	1273	sub_G	50	no_sweep	0	-	-	-	-	-	-	-	-			-	-	-	-	-	-	-	-
13	AAK_14	AAK_14_50	AAK	k77_7972	1292	sub_A	50	no_sweep	0	-	-	-	-	-	-	-	-			-	-	-	-	-	-	-	-
14	AAK_16	AAK_16_1	AAK	k77_227259	31259	sub_C	4	no_sweep	0	AAK_g12277_28	in	UniRef100_R6PXS0	99.7	ISTde2 transposase	114	non_syn	T->A	-	HTH_38,rve	-	-	-	-	-	-	-	-
14	AAK_16	AAK_16_2	AAK	k77_227259	38351	sub_G	4	no_sweep	0	AAK_g12277_41	in	UniRef100_F4XCM2	83.566	Reverse transcriptase domain-containing protein	292	non_syn	V->A	-	RVT_1	-	-	-	-	-	-	-	-
14	AAK_16	AAK_16_3	AAK	k77_315117	10831	dangleRight_BACK|+	4	no_sweep	0	AAK_g19442_19	in	UniRef100_R6PU86	94.3	Mucin-5AC	421	unknown	unknown	-	-	-	-	-	-	-	-	-	-
14	AAK_16	AAK_16_4	AAK	k77_318555	126982	sub_G	4	no_sweep	0	AAK_g62604_114	in	UniRef100_A0A1C6IJ58	82	DNA repair protein RadA	494	syn	G->G	-	AAA_25	-	-	-	-	-	-	-	-
15	AAK_17	AAK_17_1	AAK	k77_216833	1110	sub_T	6	no_sweep	0	AAK_g9069_2	upstream	UniRef100_A0A173ZFI8	100	1,5-anhydro-D-fructose reductase	-71	undefined	undefined	-	GFO_IDH_MocA,GFO_IDH_MocA_C	-	-	-	-	-	-	-	-
15	AAK_17	AAK_17_2	AAK	k77_216833	1111	sub_G	6	no_sweep	0	AAK_g9069_2	upstream	UniRef100_A0A173ZFI8	100	1,5-anhydro-D-fructose reductase	-70	undefined	undefined	-	GFO_IDH_MocA,GFO_IDH_MocA_C	-	-	-	-	-	-	-	-
15	AAK_17	AAK_17_3	AAK	k77_216833	1112	sub_A	6	no_sweep	0	AAK_g9069_2	upstream	UniRef100_A0A173ZFI8	100	1,5-anhydro-D-fructose reductase	-69	undefined	undefined	-	GFO_IDH_MocA,GFO_IDH_MocA_C	-	-	-	-	-	-	-	-
15	AAK_17	AAK_17_4	AAK	k77_216833	1119	sub_T	6	no_sweep	0	AAK_g9069_2	upstream	UniRef100_A0A173ZFI8	100	1,5-anhydro-D-fructose reductase	-62	undefined	undefined	-	GFO_IDH_MocA,GFO_IDH_MocA_C	-	-	-	-	-	-	-	-
15	AAK_17	AAK_17_5	AAK	k77_216833	1122	sub_G	6	no_sweep	0	AAK_g9069_2	upstream	UniRef100_A0A173ZFI8	100	1,5-anhydro-D-fructose reductase	-59	undefined	undefined	-	GFO_IDH_MocA,GFO_IDH_MocA_C	-	-	-	-	-	-	-	-
15	AAK_17	AAK_17_6	AAK	k77_304041	845	sub_C	6	no_sweep	0	AAK_g7379_2	in	UniRef100_A0A173RA08	99.8	Uncharacterized protein	677	syn	Y->Y	-	-	-	-	-	-	-	-	-	-
16	AAK_19	AAK_19_1	AAK	k77_141187	78757	sub_G	8	no_sweep	0	AAK_g34765_60	upstream	UniRef100_F3QZ16	96	Glycosyl hydrolase family 2, sugar binding domain protein	-139	undefined	undefined	ko:K01190	DUF4982,Glyco_hydro_2,Glyco_hydro_2_C,Glyco_hydro_2_N,Glyco_hydro_43	AAK_g34765_61	downstream	UniRef100_G5SLI1	97.5	Response regulator receiver domain protein	4138	undefined	undefined	-	HATPase_c,HTH_18,HisKA,Reg_prop,Response_reg,Y_Y_Y
16	AAK_19	AAK_19_2	AAK	k77_15781	15891	sub_T	8	no_sweep	0	AAK_g4775_17	upstream	UniRef100_R5NEF3	100	Uncharacterized protein	-8	undefined	undefined	ko:K03634	LolA,LolA_2	AAK_g4775_18	downstream	UniRef100_R5NZ58	100	FtsK/SpoIIIE family protein	2509	undefined	undefined	ko:K03466	FtsK_4TM,FtsK_SpoIIIE,Ftsk_gamma
16	AAK_19	AAK_19_3	AAK	k77_241853	5106	sub_A	8	no_sweep	0	AAK_g1200_4	in	UniRef100_G5SQ22	94.669	Polysaccharide biosynthesis protein	1545	syn	R->R	ko:K03328	Polysacc_synt,Polysacc_synt_3	-	-	-	-	-	-	-	-
16	AAK_19	AAK_19_4	AAK	k77_257002	24086	del_1	8	no_sweep	0	AAK_g67789_20	in	UniRef100_R5NZW8	99.6	Transporter cation channel family protein	501	unknown	unknown	ko:K10716	Ion_trans,Ion_trans_2	-	-	-	-	-	-	-	-
16	AAK_19	AAK_19_5	AAK	k77_98739	33333	sub_A	8	no_sweep	0	AAK_g16028_26	in	UniRef100_R5N8Z1	98.8	TonB-dependent receptor plug domain protein	1948	non_syn	H->L	-	CarbopepD_reg_2,Plug,TonB_dep_Rec	-	-	-	-	-	-	-	-
16	AAK_19	AAK_19_6	AAK	k77_98739	33448	sub_C	8	no_sweep	0	AAK_g16028_26	in	UniRef100_R5N8Z1	98.8	TonB-dependent receptor plug domain protein	1833	non_syn	K->E	-	CarbopepD_reg_2,Plug,TonB_dep_Rec	-	-	-	-	-	-	-	-
16	AAK_19	AAK_19_7	AAK	k77_141187	66255	sub_C	8	no_sweep	0	AAK_g34765_56	in	UniRef100_UPI001032B40C	97.975	family 78 glycoside hydrolase catalytic domain	3278	non_syn	Ii->Mi	ko:K05989	Bac_rhamnosid,Bac_rhamnosid6H,Bac_rhamnosid_C,Bac_rhamnosid_N	-	-	-	-	-	-	-	-
16	AAK_19	AAK_19_8	AAK	k77_325708	56416	del_2	8	no_sweep	0	AAK_g21466_40	in	UniRef100_F3QXN2	86.643	Conserved domain protein	1564	unknown	unknown	-	-	-	-	-	-	-	-	-	-
16	AAK_19	AAK_19_9	AAK	k77_164085	456	sub_G	4	no_sweep	0	AAK_g60286_1	downstream	UniRef100_R5NTD5	100	Conserved domain protein	1634	undefined	undefined	-	DUF5128	-	-	-	-	-	-	-	-
16	AAK_19	AAK_19_10	AAK	k77_164085	459	ins_A	4	no_sweep	0	AAK_g60286_1	downstream	UniRef100_R5NTD5	100	Conserved domain protein	1631	undefined	undefined	-	DUF5128	-	-	-	-	-	-	-	-
16	AAK_19	AAK_19_11	AAK	k77_164085	777	sub_G	4	no_sweep	0	AAK_g60286_1	downstream	UniRef100_R5NTD5	100	Conserved domain protein	1313	undefined	undefined	-	DUF5128	-	-	-	-	-	-	-	-
16	AAK_19	AAK_19_12	AAK	k77_164085	782	sub_C	4	no_sweep	0	AAK_g60286_1	downstream	UniRef100_R5NTD5	100	Conserved domain protein	1308	undefined	undefined	-	DUF5128	-	-	-	-	-	-	-	-
17	AAK_20	AAK_20_1	AAK	k77_100848	3712	sub_C	23	sweep	0	AAK_g46256_6	in	UniRef100_A0A1C5P083	100	HPr kinase/phosphorylase	38	syn	T->T	ko:K06023	Hpr_kinase_C,Hpr_kinase_N	-	-	-	-	-	-	-	-
17	AAK_20	AAK_20_2	AAK	k77_100848	6066	sub_G	23	sweep	0	AAK_g46256_8	in	UniRef100_A0A1C5P040	100	UDP-N-acetylenolpyruvoylglucosamine reductase	490	non_syn	E->G	ko:K00075	FAD_binding_4,MurB_C	-	-	-	-	-	-	-	-
17	AAK_20	AAK_20_3	AAK	k77_100848	8681	sub_T	23	sweep	0	AAK_g46256_11	in	UniRef100_A0A1C6ICK4	100	Probable cell division protein WhiA	204	syn	Li->Li	ko:K09762	HTH_WhiA,LAGLIDADG_WhiA,WhiA_N	-	-	-	-	-	-	-	-
17	AAK_20	AAK_20_4	AAK	k77_100848	8908	sub_A	23	sweep	0	AAK_g46256_11	in	UniRef100_A0A1C6ICK4	100	Probable cell division protein WhiA	431	syn	A->A	ko:K09762	HTH_WhiA,LAGLIDADG_WhiA,WhiA_N	-	-	-	-	-	-	-	-
17	AAK_20	AAK_20_5	AAK	k77_100848	9226	sub_G	23	no_sweep	0	AAK_g46256_11	in	UniRef100_A0A1C6ICK4	100	Probable cell division protein WhiA	749	non_syn	L->Li	ko:K09762	HTH_WhiA,LAGLIDADG_WhiA,WhiA_N	-	-	-	-	-	-	-	-
17	AAK_20	AAK_20_6	AAK	k77_100848	2313	sub_T	23	sweep	0	AAK_g46256_3	in	UniRef100_A0A1C5P0G1	100	Predicted acetyltransferase involved in intracellular survival and related acetyltransferases	285	non_syn	G->R	-	-	-	-	-	-	-	-	-	-
17	AAK_20	AAK_20_7	AAK	k77_100848	4790	sub_T	23	sweep	0	AAK_g46256_7	in	UniRef100_UPI000E65658B	100	ROK family protein	178	non_syn	A->Vi	ko:K00845	ROK	-	-	-	-	-	-	-	-
17	AAK_20	AAK_20_8	AAK	k77_100848	4923	sub_A	23	sweep	0	AAK_g46256_7	in	UniRef100_UPI000E65658B	100	ROK family protein	311	syn	P->P	ko:K00845	ROK	-	-	-	-	-	-	-	-
17	AAK_20	AAK_20_9	AAK	k77_100848	5130	sub_G	23	sweep	0	AAK_g46256_7	in	UniRef100_UPI000E65658B	100	ROK family protein	518	syn	G->G	ko:K00845	ROK	-	-	-	-	-	-	-	-
17	AAK_20	AAK_20_10	AAK	k77_100848	5148	sub_A	23	sweep	0	AAK_g46256_7	in	UniRef100_UPI000E65658B	100	ROK family protein	536	syn	E->E	ko:K00845	ROK	-	-	-	-	-	-	-	-
17	AAK_20	AAK_20_11	AAK	k77_100848	5187	sub_G	23	sweep	0	AAK_g46256_7	in	UniRef100_UPI000E65658B	100	ROK family protein	575	syn	E->E	ko:K00845	ROK	-	-	-	-	-	-	-	-
17	AAK_20	AAK_20_12	AAK	k77_100848	7411	sub_A	23	sweep	0	AAK_g46256_10	in	UniRef100_A0A4D7ANH1	100	Putative gluconeogenesis factor	29	syn	R->R	-	UPF0052	-	-	-	-	-	-	-	-
17	AAK_20	AAK_20_13	AAK	k77_100848	7495	sub_C	23	sweep	0	AAK_g46256_10	in	UniRef100_A0A4D7ANH1	100	Putative gluconeogenesis factor	113	syn	N->N	-	UPF0052	-	-	-	-	-	-	-	-
17	AAK_20	AAK_20_14	AAK	k77_100848	7798	sub_C	23	sweep	0	AAK_g46256_10	in	UniRef100_A0A4D7ANH1	100	Putative gluconeogenesis factor	416	non_syn	Vi->V	-	UPF0052	-	-	-	-	-	-	-	-
17	AAK_20	AAK_20_15	AAK	k77_100848	8395	sub_G	23	sweep	0	AAK_g46256_10	in	UniRef100_A0A4D7ANH1	100	Putative gluconeogenesis factor	1013	syn	R->R	-	UPF0052	-	-	-	-	-	-	-	-
17	AAK_20	AAK_20_16	AAK	k77_100848	8413	sub_T	23	sweep	0	AAK_g46256_10	in	UniRef100_A0A4D7ANH1	100	Putative gluconeogenesis factor	1031	syn	D->D	-	UPF0052	-	-	-	-	-	-	-	-
17	AAK_20	AAK_20_17	AAK	k77_100848	8414	sub_G	23	sweep	0	AAK_g46256_10	in	UniRef100_A0A4D7ANH1	100	Putative gluconeogenesis factor	1032	non_syn	S->A	-	UPF0052	-	-	-	-	-	-	-	-
17	AAK_20	AAK_20_18	AAK	k77_100848	8433	sub_G	23	sweep	0	AAK_g46256_10	in	UniRef100_A0A4D7ANH1	100	Putative gluconeogenesis factor	1051	non_syn	Q->R	-	UPF0052	-	-	-	-	-	-	-	-
17	AAK_20	AAK_20_19	AAK	k77_100848	9876	ins_CTGGGCAGA	23	sweep	0	AAK_g46256_13	in	UniRef100_U2QGH5	96.478	Uncharacterized protein	5	unknown	unknown	-	DUF3788	-	-	-	-	-	-	-	-
17	AAK_20	AAK_20_20	AAK	k77_100848	9978	sub_G	23	sweep	0	AAK_g46256_13	in	UniRef100_U2QGH5	96.478	Uncharacterized protein	107	syn	G->G	-	DUF3788	-	-	-	-	-	-	-	-
17	AAK_20	AAK_20_21	AAK	k77_100848	10205	sub_A	23	sweep	0	AAK_g46256_13	in	UniRef100_U2QGH5	96.478	Uncharacterized protein	334	non_syn	R->H	-	DUF3788	-	-	-	-	-	-	-	-
17	AAK_20	AAK_20_22	AAK	k77_100848	11407	sub_T	23	sweep	0	AAK_g46256_14	in	UniRef100_A0A3A8YVT7	82.9	DNA polymerase III subunit alpha	1064	syn	G->G	ko:K02337,ko:K14162	DNA_pol3_alpha,HHH_6,PHP,tRNA_anti-codon	-	-	-	-	-	-	-	-
17	AAK_20	AAK_20_23	AAK	k77_100848	11413	sub_T	23	sweep	0	AAK_g46256_14	in	UniRef100_A0A3A8YVT7	82.9	DNA polymerase III subunit alpha	1070	syn	G->G	ko:K02337,ko:K14162	DNA_pol3_alpha,HHH_6,PHP,tRNA_anti-codon	-	-	-	-	-	-	-	-
17	AAK_20	AAK_20_24	AAK	k77_100848	7015	sub_C	4	sweep	0	AAK_g46256_9	in	UniRef100_U2R0L6	100	Nucleotide-binding protein HMPREF1546_02903	500	syn	S->S	ko:K06958	ATP_bind_2	-	-	-	-	-	-	-	-
17	AAK_20	AAK_20_25	AAK	k77_100848	3337	sub_T	4	sweep	0	AAK_g46256_5	in	UniRef100_A0A4D7AYV2	99.2	Putative fluoride ion transporter CrcB	27	non_syn	R->G	ko:K06199	CRCB	-	-	-	-	-	-	-	-
17	AAK_20	AAK_20_26	AAK	k77_100848	11254	sub_C	4	sweep	0	AAK_g46256_14	in	UniRef100_A0A3A8YVT7	82.9	DNA polymerase III subunit alpha	911	syn	D->D	ko:K02337,ko:K14162	DNA_pol3_alpha,HHH_6,PHP,tRNA_anti-codon	-	-	-	-	-	-	-	-
17	AAK_20	AAK_20_27	AAK	k77_100848	11602	sub_C	4	no_sweep	0	AAK_g46256_14	in	UniRef100_A0A3A8YVT7	82.9	DNA polymerase III subunit alpha	1259	syn	D->D	ko:K02337,ko:K14162	DNA_pol3_alpha,HHH_6,PHP,tRNA_anti-codon	-	-	-	-	-	-	-	-
18	AAK_21	AAK_21_1	AAK	k77_135597	26512	ins_TG	19	sweep	0	AAK_g26617_26	upstream	UniRef100_R5LH42	100	Flagellar basal body rod protein FlgB	-129	undefined	undefined	ko:K02387	-	AAK_g26617_27	downstream	UniRef100_R5LGP5	99.9	Uncharacterized protein	2611	undefined	undefined	-	-
18	AAK_21	AAK_21_2	AAK	k77_101867	6346	sub_A	19	no_sweep	0	AAK_g57922_7	downstream	UniRef100_A0A3D4KXV4	100	Flavodoxin family protein	791	undefined	undefined	-	FMN_red	AAK_g57922_8	upstream	UniRef100_R5L2N4	99.5	Rubrerythrin	-357	undefined	undefined	-	Rubrerythrin
18	AAK_21	AAK_21_3	AAK	k77_102394	4126	sub_A	19	no_sweep	0	AAK_g63938_5	in	UniRef100_A0A3D4L2H5	100	DNA-binding response regulator	267	non_syn	K->*	ko:K07667	Response_reg,Trans_reg_C	-	-	-	-	-	-	-	-
18	AAK_21	AAK_21_4	AAK	k77_103184	14751	sub_C	19	no_sweep	0	AAK_g6636_15	in	UniRef100_R5LLF5	98	4-diphosphocytidyl-2-C-methyl-D-erythritol kinase	109	non_syn	Ii->T	ko:K00919	GHMP_kinases_C,GHMP_kinases_N	-	-	-	-	-	-	-	-
18	AAK_21	AAK_21_5	AAK	k77_103600	4645	sub_C	19	no_sweep	0	AAK_g11330_4	in	UniRef100_R5LKE4	99	Putative ABC-type transport system involved in lysophospholipase L1 biosynthesis permease component	1810	non_syn	R->P	ko:K02004,ko:K11636	FtsX	-	-	-	-	-	-	-	-
18	AAK_21	AAK_21_6	AAK	k77_115388	2788	sub_T	19	no_sweep	0	AAK_g29939_3	in	UniRef100_R5LKZ6	100	Branched-chain amino acid ABC transporter permease protein	44	non_syn	Vi->V	ko:K02057	BPD_transp_2	-	-	-	-	-	-	-	-
18	AAK_21	AAK_21_7	AAK	k77_163828	2597	sub_A	19	no_sweep	0	AAK_g56024_2	in	UniRef100_R5L1W4	99.5	PAS domain S-box/diguanylate cyclase (GGDEF) domain	1076	non_syn	S->R	-	GAF,GGDEF,HD,PAS_3,PAS_4,PAS_9,SnoaL_3,dCache_1	-	-	-	-	-	-	-	-
18	AAK_21	AAK_21_8	AAK	k77_172458	16581	sub_C	19	no_sweep	0	AAK_g45456_10	downstream	UniRef100_R5LJW0	99.3	Uncharacterized protein	1266	undefined	undefined	ko:K08978	EamA	AAK_g45456_11	downstream	UniRef100_R5L0Q4	100	Phosphoglycerate mutase (2,3-diphosphoglycerate-independent)	1632	undefined	undefined	ko:K15633	Metalloenzyme,Phosphodiest,iPGM_N
18	AAK_21	AAK_21_9	AAK	k77_211654	8750	sub_A	19	no_sweep	0	AAK_g9707_6	in	UniRef100_A0A3D4L2E7	99.8	Cell division protein FtsI	43	non_syn	Y->F	ko:K03587,ko:K08384	PASTA,PBP_dimer,Transpeptidase	-	-	-	-	-	-	-	-
18	AAK_21	AAK_21_10	AAK	k77_219559	12036	sub_C	19	no_sweep	0	AAK_g46333_14	in	UniRef100_A0A3D4L311	99.6	ABC transmembrane type-1 domain-containing protein	821	non_syn	V->Vi	ko:K02029,ko:K02030	BPD_transp_1,SBP_bac_3	-	-	-	-	-	-	-	-
18	AAK_21	AAK_21_11	AAK	k77_247314	90378	sub_A	19	no_sweep	0	AAK_g6006_82	in	UniRef100_A0A3D4L4X6	98.7	HTH luxR-type domain-containing protein	580	non_syn	F->Y	-	GerE	-	-	-	-	-	-	-	-
18	AAK_21	AAK_21_12	AAK	k77_139212	10723	sub_T	19	no_sweep	0	AAK_g6269_10	in	UniRef100_R5LP39	54.088	Bacterial regulatory protein MarR family	217	non_syn	K->Ii	-	HTH_27,MarR_2	-	-	-	-	-	-	-	-
18	AAK_21	AAK_21_13	AAK	k77_143320	16277	sub_C	19	no_sweep	0	AAK_g60864_12	in	UniRef100_R5L3K4	99.1	Uncharacterized protein	389	non_syn	K->N	-	-	-	-	-	-	-	-	-	-
18	AAK_21	AAK_21_14	AAK	k77_160284	14452	del_7	19	no_sweep	0	AAK_g11671_14	upstream	UniRef100_A0A3D4KZ38	99.2	Sialate O-acetylesterase	-63	undefined	undefined	ko:K05970	SASA	AAK_g11671_15	downstream	UniRef100_R5L3H5	100	Putative pre-16S rRNA nuclease	578	undefined	undefined	ko:K07447	RuvX
18	AAK_21	AAK_21_15	AAK	k77_163523	3858	sub_A	19	no_sweep	0	AAK_g52043_2	in	UniRef100_R5LC82	99.246	Uncharacterized protein	1403	syn	A->A			-	-	-	-	-	-	-	-
18	AAK_21	AAK_21_16	AAK	k77_277975	27357	del_1	19	no_sweep	0	AAK_g2322_32	upstream	UniRef100_R5LMZ9	99.6	Glucose-6-phosphate isomerase	-192	undefined	undefined	ko:K01810	PGI	AAK_g2322_33	downstream	UniRef100_A0A3D4L019	60.021	Uncharacterized protein	716	undefined	undefined
18	AAK_21	AAK_21_17	AAK	k77_303270	5607	sub_G	19	no_sweep	0	AAK_g69990_5	in	UniRef100_R5L918	99.9	Peptidase U32 family	1150	non_syn	N->T	ko:K08303	DUF3656,Peptidase_U32	-	-	-	-	-	-	-	-
18	AAK_21	AAK_21_18	AAK	k77_307968	2892	sub_T	19	no_sweep	0	AAK_g61103_2	in	UniRef100_A0A3D4CC51	98.1	Sugar fermentation stimulation protein homolog	550	non_syn	D->V	ko:K06206	SfsA	-	-	-	-	-	-	-	-
18	AAK_21	AAK_21_19	AAK	k77_91717	30122	sub_G	19	no_sweep	0	AAK_g55092_25	in	UniRef100_R5LKA0	100	Uncharacterized protein	7	non_syn	F->C			-	-	-	-	-	-	-	-
19	AAK_22	AAK_22_1	AAK	k77_48479	581	sub_T	1	no_sweep	0	AAK_g32657_1	in	UniRef100_D4LPW2	68.078	Na+-driven multidrug efflux pump	71	syn	P->P	-	MatE	-	-	-	-	-	-	-	-
20	AAK_23	AAK_23_1	AAK	k77_287140	1053	sub_G	5	no_sweep	0	AAK_g53907_1	in	UniRef100_C6JBD8	99.9	FtsX domain-containing protein	1652	syn	Ii->Ii	ko:K02004	FtsX	-	-	-	-	-	-	-	-
20	AAK_23	AAK_23_2	AAK	k77_287140	1314	sub_A	5	no_sweep	0	AAK_g53907_1	in	UniRef100_C6JBD8	99.9	FtsX domain-containing protein	1391	syn	V->V	ko:K02004	FtsX	-	-	-	-	-	-	-	-
20	AAK_23	AAK_23_3	AAK	k77_287140	1320	sub_A	5	no_sweep	0	AAK_g53907_1	in	UniRef100_C6JBD8	99.9	FtsX domain-containing protein	1385	syn	D->D	ko:K02004	FtsX	-	-	-	-	-	-	-	-
20	AAK_23	AAK_23_4	AAK	k77_287140	2160	sub_G	5	no_sweep	0	AAK_g53907_1	in	UniRef100_C6JBD8	99.9	FtsX domain-containing protein	545	syn	Ii->Ii	ko:K02004	FtsX	-	-	-	-	-	-	-	-
20	AAK_23	AAK_23_5	AAK	k77_287140	2818	sub_G	5	no_sweep	0	AAK_g53907_2	in	UniRef100_A0A173YWI8	100	Lipoprotein-releasing system ATP-binding protein LolD	581	syn	S->S	ko:K02003	ABC_tran	-	-	-	-	-	-	-	-
20	AAK_23	AAK_23_6	AAK	k77_287140	2112	sub_G	7	no_sweep	0	AAK_g53907_1	in	UniRef100_C6JBD8	99.9	FtsX domain-containing protein	593	syn	F->F	ko:K02004	FtsX	-	-	-	-	-	-	-	-
20	AAK_23	AAK_23_7	AAK	k77_287140	2457	sub_G	7	no_sweep	0	AAK_g53907_1	in	UniRef100_C6JBD8	99.9	FtsX domain-containing protein	248	syn	N->N	ko:K02004	FtsX	-	-	-	-	-	-	-	-
20	AAK_23	AAK_23_8	AAK	k77_287140	2487	sub_C	7	no_sweep	0	AAK_g53907_1	in	UniRef100_C6JBD8	99.9	FtsX domain-containing protein	218	syn	T->T	ko:K02004	FtsX	-	-	-	-	-	-	-	-
20	AAK_23	AAK_23_9	AAK	k77_109128	3675	sub_G	7	no_sweep	0	-	-	-	-	-	-	-	-			-	-	-	-	-	-	-	-
20	AAK_23	AAK_23_10	AAK	k77_109917	2351	sub_G	7	no_sweep	0	AAK_g34034_3	in	UniRef100_A0A4P9EB14	99.7	ABC transporter ATP-binding protein	1661	non_syn	R->S	ko:K06147	ABC_membrane,ABC_tran	-	-	-	-	-	-	-	-
20	AAK_23	AAK_23_11	AAK	k77_109917	2352	sub_T	7	no_sweep	0	AAK_g34034_3	in	UniRef100_A0A4P9EB14	99.7	ABC transporter ATP-binding protein	1660	non_syn	R->K	ko:K06147	ABC_membrane,ABC_tran	-	-	-	-	-	-	-	-
20	AAK_23	AAK_23_12	AAK	k77_190161	2958	sub_A	7	no_sweep	0	AAK_g66477_2	in	UniRef100_UPI0011CAEE0E	96.1	tyrosine-type recombinase/integrase	329	syn	Y->Y	-	Phage_integrase	-	-	-	-	-	-	-	-
20	AAK_23	AAK_23_13	AAK	k77_144658	16325	sub_T	1	no_sweep	0	AAK_g8832_17	in	UniRef100_A0A417L406	98.75	ABC transporter permease	690	non_syn	G->R	ko:K10440	BPD_transp_2	-	-	-	-	-	-	-	-
20	AAK_23	AAK_23_14	AAK	k77_265223	996	sub_T	6	no_sweep	0	AAK_g38864_1	in	UniRef100_UPI0013610D4A	48.148	response regulator	449	syn	P->P	-	HATPase_c,HisKA,PAS_9,Response_reg	-	-	-	-	-	-	-	-
20	AAK_23	AAK_23_15	AAK	k77_265223	1001	sub_G	6	no_sweep	0	AAK_g38864_1	in	UniRef100_UPI0013610D4A	48.148	response regulator	444	non_syn	V->L	-	HATPase_c,HisKA,PAS_9,Response_reg	-	-	-	-	-	-	-	-
20	AAK_23	AAK_23_16	AAK	k77_265223	1004	sub_C	6	no_sweep	0	AAK_g38864_1	in	UniRef100_UPI0013610D4A	48.148	response regulator	441	non_syn	T->A	-	HATPase_c,HisKA,PAS_9,Response_reg	-	-	-	-	-	-	-	-
20	AAK_23	AAK_23_17	AAK	k77_265223	1016	sub_C	6	no_sweep	0	AAK_g38864_1	in	UniRef100_UPI0013610D4A	48.148	response regulator	429	non_syn	Ii->V	-	HATPase_c,HisKA,PAS_9,Response_reg	-	-	-	-	-	-	-	-
20	AAK_23	AAK_23_18	AAK	k77_265223	1017	sub_A	6	no_sweep	0	AAK_g38864_1	in	UniRef100_UPI0013610D4A	48.148	response regulator	428	non_syn	Vi->V	-	HATPase_c,HisKA,PAS_9,Response_reg	-	-	-	-	-	-	-	-
20	AAK_23	AAK_23_19	AAK	k77_265223	1019	sub_T	6	no_sweep	0	AAK_g38864_1	in	UniRef100_UPI0013610D4A	48.148	response regulator	426	non_syn	Vi->Mi	-	HATPase_c,HisKA,PAS_9,Response_reg	-	-	-	-	-	-	-	-
21	AAK_24	AAK_24_1	AAK	k77_78609	3384	sub_C	3	no_sweep	0	AAK_g19589_2	in	UniRef100_A0A328UGC5	97.8	Oleate hydratase	320	non_syn	V->Vi	ko:K10254	MCRA	-	-	-	-	-	-	-	-
21	AAK_24	AAK_24_2	AAK	k77_78609	3399	sub_C	3	no_sweep	0	AAK_g19589_2	in	UniRef100_A0A328UGC5	97.8	Oleate hydratase	305	syn	T->T	ko:K10254	MCRA	-	-	-	-	-	-	-	-
21	AAK_24	AAK_24_3	AAK	k77_28542	1199	sub_A	3	no_sweep	0	AAK_g41558_4	in	UniRef100_A0A1Y4EU30	100	Alpha/beta hydrolase	156	non_syn	E->K	-	Abhydrolase_1,Abhydrolase_6	-	-	-	-	-	-	-	-
22	AAK_26	AAK_26_1	AAK	k77_254544	26787	sub_A	8	no_sweep	0	AAK_g33636_23	in	UniRef100_A0A496DX29	100	Formate-dependent phosphoribosylglycinamide formyltransferase	1169	non_syn	E->D	ko:K08289	ATP-grasp,Epimerase	-	-	-	-	-	-	-	-
22	AAK_26	AAK_26_2	AAK	k77_113027	53461	sub_C	8	sweep	0	AAK_g70546_53	in	UniRef100_UPI0010207D2F	99.2	hypothetical protein	2182	non_syn	R->T	-	-	-	-	-	-	-	-	-	-
22	AAK_26	AAK_26_3	AAK	k77_113027	54792	sub_A	8	sweep	0	AAK_g70546_53	in	UniRef100_UPI0010207D2F	99.2	hypothetical protein	851	non_syn	N->K	-	-	-	-	-	-	-	-	-	-
22	AAK_26	AAK_26_4	AAK	k77_113027	55013	sub_T	8	sweep	0	AAK_g70546_53	in	UniRef100_UPI0010207D2F	99.2	hypothetical protein	630	non_syn	T->A	-	-	-	-	-	-	-	-	-	-
22	AAK_26	AAK_26_5	AAK	k77_69446	36760	sub_A	8	sweep	0	AAK_g39268_28	in	UniRef100_UPI0005C82A31	81.69	helix-turn-helix transcriptional regulator	187	non_syn	N->T	-	HTH_18	-	-	-	-	-	-	-	-
22	AAK_26	AAK_26_6	AAK	k77_113027	53587	sub_T	8	no_sweep	0	AAK_g70546_53	in	UniRef100_UPI0010207D2F	99.2	hypothetical protein	2056	non_syn	E->G	-	-	-	-	-	-	-	-	-	-
22	AAK_26	AAK_26_7	AAK	k77_113027	54869	sub_T	8	no_sweep	0	AAK_g70546_53	in	UniRef100_UPI0010207D2F	99.2	hypothetical protein	774	non_syn	T->P	-	-	-	-	-	-	-	-	-	-
22	AAK_26	AAK_26_8	AAK	k77_69446	37269	sub_C	8	no_sweep	0	AAK_g39268_28	in	UniRef100_UPI0005C82A31	81.69	helix-turn-helix transcriptional regulator	696	non_syn	Q->*	-	HTH_18	-	-	-	-	-	-	-	-
23	AAK_27	AAK_27_1	AAK	k77_101271	20103	sub_T	6	no_sweep	0	AAK_g52084_23	in	UniRef100_A0A3R6GRK9	100	Beta-galactosidase	736	non_syn	R->Q	ko:K01190	Bgal_small_N	-	-	-	-	-	-	-	-
23	AAK_27	AAK_27_2	AAK	k77_101271	20104	sub_T	6	no_sweep	0	AAK_g52084_23	in	UniRef100_A0A3R6GRK9	100	Beta-galactosidase	735	syn	R->R	ko:K01190	Bgal_small_N	-	-	-	-	-	-	-	-
23	AAK_27	AAK_27_3	AAK	k77_101271	20105	sub_G	6	no_sweep	0	AAK_g52084_23	in	UniRef100_A0A3R6GRK9	100	Beta-galactosidase	734	syn	D->D	ko:K01190	Bgal_small_N	-	-	-	-	-	-	-	-
23	AAK_27	AAK_27_4	AAK	k77_101271	20108	sub_T	6	no_sweep	0	AAK_g52084_23	in	UniRef100_A0A3R6GRK9	100	Beta-galactosidase	731	non_syn	Mi->Ii	ko:K01190	Bgal_small_N	-	-	-	-	-	-	-	-
23	AAK_27	AAK_27_5	AAK	k77_101271	20109	sub_T	6	no_sweep	0	AAK_g52084_23	in	UniRef100_A0A3R6GRK9	100	Beta-galactosidase	730	non_syn	Mi->K	ko:K01190	Bgal_small_N	-	-	-	-	-	-	-	-
23	AAK_27	AAK_27_6	AAK	k77_101271	20120	sub_A	6	no_sweep	0	AAK_g52084_23	in	UniRef100_A0A3R6GRK9	100	Beta-galactosidase	719	syn	R->R	ko:K01190	Bgal_small_N	-	-	-	-	-	-	-	-
24	AAK_28	AAK_28_1	AAK	k77_90625	204	sub_G	9	no_sweep	0	AAK_g40169_1	in	UniRef100_A0A1C6IJN8	36.413	Group II intron-encoded protein ltrA	203	syn	G->G	-	Intron_maturas2,RVT_1	-	-	-	-	-	-	-	-
24	AAK_28	AAK_28_2	AAK	k77_90625	207	sub_T	9	no_sweep	0	AAK_g40169_1	in	UniRef100_A0A1C6IJN8	36.413	Group II intron-encoded protein ltrA	206	non_syn	Li->L	-	Intron_maturas2,RVT_1	-	-	-	-	-	-	-	-
24	AAK_28	AAK_28_3	AAK	k77_90625	213	sub_C	9	no_sweep	0	AAK_g40169_1	in	UniRef100_A0A1C6IJN8	36.413	Group II intron-encoded protein ltrA	212	syn	N->N	-	Intron_maturas2,RVT_1	-	-	-	-	-	-	-	-
24	AAK_28	AAK_28_4	AAK	k77_90625	216	sub_T	9	no_sweep	0	AAK_g40169_1	in	UniRef100_A0A1C6IJN8	36.413	Group II intron-encoded protein ltrA	215	syn	Y->Y	-	Intron_maturas2,RVT_1	-	-	-	-	-	-	-	-
24	AAK_28	AAK_28_5	AAK	k77_90625	222	sub_A	9	no_sweep	0	AAK_g40169_1	in	UniRef100_A0A1C6IJN8	36.413	Group II intron-encoded protein ltrA	221	syn	R->R	-	Intron_maturas2,RVT_1	-	-	-	-	-	-	-	-
24	AAK_28	AAK_28_6	AAK	k77_90625	234	sub_C	9	no_sweep	0	AAK_g40169_1	in	UniRef100_A0A1C6IJN8	36.413	Group II intron-encoded protein ltrA	233	syn	N->N	-	Intron_maturas2,RVT_1	-	-	-	-	-	-	-	-
24	AAK_28	AAK_28_7	AAK	k77_90625	242	sub_C	9	no_sweep	0	AAK_g40169_1	in	UniRef100_A0A1C6IJN8	36.413	Group II intron-encoded protein ltrA	241	non_syn	V->A	-	Intron_maturas2,RVT_1	-	-	-	-	-	-	-	-
24	AAK_28	AAK_28_8	AAK	k77_90625	251	sub_G	9	no_sweep	0	AAK_g40169_1	in	UniRef100_A0A1C6IJN8	36.413	Group II intron-encoded protein ltrA	250	non_syn	N->S	-	Intron_maturas2,RVT_1	-	-	-	-	-	-	-	-
24	AAK_28	AAK_28_9	AAK	k77_90625	264	sub_C	9	no_sweep	0	AAK_g40169_1	in	UniRef100_A0A1C6IJN8	36.413	Group II intron-encoded protein ltrA	263	syn	Ii->Ii	-	Intron_maturas2,RVT_1	-	-	-	-	-	-	-	-
25	AAK_30	AAK_30_1	AAK	k77_139582	8352	sub_G	4	no_sweep	0	AAK_g11231_7	in	UniRef100_A0A316PZV5	77.372	Response regulatory domain-containing protein	587	syn	S->S	-	LytTR,Response_reg	-	-	-	-	-	-	-	-
25	AAK_30	AAK_30_2	AAK	k77_139582	8450	sub_T	4	no_sweep	0	AAK_g11231_7	in	UniRef100_A0A316PZV5	77.372	Response regulatory domain-containing protein	489	non_syn	A->T	-	LytTR,Response_reg	-	-	-	-	-	-	-	-
25	AAK_30	AAK_30_3	AAK	k77_139582	8601	sub_T	4	no_sweep	0	AAK_g11231_7	in	UniRef100_A0A316PZV5	77.372	Response regulatory domain-containing protein	338	non_syn	Li->L	-	LytTR,Response_reg	-	-	-	-	-	-	-	-
25	AAK_30	AAK_30_4	AAK	k77_139973	32466	sub_C	4	no_sweep	0	AAK_g17589_27	in	UniRef100_A0A3D2EFN9	57.304	Uncharacterized protein (Fragment)	1148	syn	T->T	-	Big_2,CBM_4_9,Cadherin-like,Flg_new,Glyco_hydro_43,Laminin_G_3,SLH,Transglut_core	-	-	-	-	-	-	-	-
25	AAK_30	AAK_30_5	AAK	k77_181047	10340	sub_A	1	no_sweep	0	AAK_g16589_8	in	UniRef100_A0A352SJY8	78.333	Acyl-CoA thioester hydrolase (Fragment)	23	syn	C->C	-	BAAT_C	-	-	-	-	-	-	-	-
26	AAK_31	AAK_31_1	AAK	k77_190470	59643	sub_G	70	no_sweep	567	AAK_g1837_51	in	UniRef100_A0A316SNK4	99.7	Thiamine ABC transporter permease	1711	non_syn	E->A	ko:K06147,ko:K11085	ABC_membrane,ABC_tran	-	-	-	-	-	-	-	-
26	AAK_31	AAK_31_2	AAK	k77_221031	13128	sub_A	70	no_sweep	471	AAK_g68989_11	in	UniRef100_A0A3D5PCK6	99.6	Replicative DNA helicase	1481	non_syn	E->D	ko:K02314	DnaB,DnaB_C	-	-	-	-	-	-	-	-
26	AAK_31	AAK_31_3	AAK	k77_108786	24895	sub_C	70	no_sweep	0	AAK_g12008_25	in	UniRef100_R7K4V6	100	Transcription termination factor Rho	59	syn	A->A	ko:K03628	ATP-synt_ab,Rho_N,Rho_RNA_bind	-	-	-	-	-	-	-	-
26	AAK_31	AAK_31_4	AAK	k77_108786	77264	del_1	70	no_sweep	0	AAK_g12008_70	downstream	UniRef100_A0A3D5PEY2	100	Radical SAM protein	926	undefined	undefined	ko:K04070	Fer4_12,Fer4_14,Radical_SAM	AAK_g12008_71	upstream	UniRef100_R7K6L8	100	Rubrerythrin	-60	undefined	undefined	-	Rubrerythrin
26	AAK_31	AAK_31_5	AAK	k77_125554	19251	sub_A	70	no_sweep	0	AAK_g36818_10	in	UniRef100_R7K3M1	98.9	DNA replication and repair protein RecF	514	non_syn	A->E	ko:K03629	SMC_N	-	-	-	-	-	-	-	-
26	AAK_31	AAK_31_6	AAK	k77_125554	19258	sub_C	70	no_sweep	0	AAK_g36818_10	in	UniRef100_R7K3M1	98.9	DNA replication and repair protein RecF	521	syn	L->L	ko:K03629	SMC_N	-	-	-	-	-	-	-	-
26	AAK_31	AAK_31_7	AAK	k77_125554	110898	sub_G	70	no_sweep	0	AAK_g36818_87	in	UniRef100_R7K390	100	Uncharacterized protein	704	syn	K->K			-	-	-	-	-	-	-	-
26	AAK_31	AAK_31_8	AAK	k77_125554	110961	sub_G	70	no_sweep	0	AAK_g36818_87	in	UniRef100_R7K390	100	Uncharacterized protein	767	syn	A->A			-	-	-	-	-	-	-	-
26	AAK_31	AAK_31_9	AAK	k77_173166	61799	sub_A	70	no_sweep	0	AAK_g59037_61	in	UniRef100_R7K4L2	100	UvrABC system protein A	1562	syn	D->D	ko:K03701	ABC_tran	-	-	-	-	-	-	-	-
26	AAK_31	AAK_31_10	AAK	k77_173166	61814	sub_C	70	no_sweep	0	AAK_g59037_61	in	UniRef100_R7K4L2	100	UvrABC system protein A	1547	syn	G->G	ko:K03701	ABC_tran	-	-	-	-	-	-	-	-
26	AAK_31	AAK_31_11	AAK	k77_173166	62250	sub_T	70	no_sweep	0	AAK_g59037_61	in	UniRef100_R7K4L2	100	UvrABC system protein A	1111	non_syn	L->H	ko:K03701	ABC_tran	-	-	-	-	-	-	-	-
26	AAK_31	AAK_31_12	AAK	k77_173166	63383	sub_T	70	no_sweep	0	AAK_g59037_62	in	UniRef100_R7K5Q8	100	UvrABC system protein B	1963	non_syn	R->K	ko:K03702	Helicase_C,ResIII,UVR,UvrB	-	-	-	-	-	-	-	-
26	AAK_31	AAK_31_13	AAK	k77_173166	79436	sub_A	70	no_sweep	0	AAK_g59037_74	upstream	UniRef100_A0A3D5PEI9	91.831	SHOCT domain-containing protein	-20	undefined	undefined			AAK_g59037_75	upstream	UniRef100_R7K4D5	97	HTH cro/C1-type domain-containing protein	-81	undefined	undefined	-	HTH_26
26	AAK_31	AAK_31_14	AAK	k77_190470	1930	sub_G	70	no_sweep	0	AAK_g1837_3	in	UniRef100_R7K7J2	97.674	Leucine--tRNA ligase	1544	syn	C->C	ko:K01869	Anticodon_1,tRNA-synt_1,tRNA-synt_1_2	-	-	-	-	-	-	-	-
26	AAK_31	AAK_31_15	AAK	k77_190470	16117	sub_T	70	no_sweep	0	AAK_g1837_14	in	UniRef100_R7K7I4	100	DNA gyrase subunit B	293	syn	C->C	ko:K02470	DNA_gyraseB,DNA_gyraseB_C,HATPase_c,Toprim	-	-	-	-	-	-	-	-
26	AAK_31	AAK_31_16	AAK	k77_190470	16120	sub_G	70	no_sweep	0	AAK_g1837_14	in	UniRef100_R7K7I4	100	DNA gyrase subunit B	296	non_syn	L->Li	ko:K02470	DNA_gyraseB,DNA_gyraseB_C,HATPase_c,Toprim	-	-	-	-	-	-	-	-
26	AAK_31	AAK_31_17	AAK	k77_190470	62266	sub_G	70	no_sweep	0	AAK_g1837_53	in	UniRef100_R7K7R8	99.5	SMC_N domain-containing protein	1759	non_syn	V->A	-	AAA_23,AAA_27	-	-	-	-	-	-	-	-
26	AAK_31	AAK_31_18	AAK	k77_190470	63900	sub_A	70	no_sweep	0	AAK_g1837_53	in	UniRef100_R7K7R8	99.5	SMC_N domain-containing protein	125	syn	F->F	-	AAA_23,AAA_27	-	-	-	-	-	-	-	-
26	AAK_31	AAK_31_19	AAK	k77_205304	2078	sub_C	70	no_sweep	0	AAK_g65826_2	in	UniRef100_R7K3V0	99.4	ABC-2 type transporter	913	non_syn	V->A	ko:K11051	ABC2_membrane,ABC2_membrane_3	-	-	-	-	-	-	-	-
26	AAK_31	AAK_31_20	AAK	k77_205304	5581	sub_G	70	no_sweep	0	AAK_g65826_5	in	UniRef100_R7K7E6	99.8	PAS domain S-box protein	1073	syn	P->P	ko:K07636	HAMP,HATPase_c,HisKA,PAS,PAS_4,sCache_like	-	-	-	-	-	-	-	-
26	AAK_31	AAK_31_21	AAK	k77_221031	33118	sub_A	70	no_sweep	0	AAK_g68989_31	in	UniRef100_R7K6T8	99.6	Isoleucine--tRNA ligase	2417	non_syn	Vi->V	ko:K01870	Anticodon_1,tRNA-synt_1	-	-	-	-	-	-	-	-
26	AAK_31	AAK_31_22	AAK	k77_221031	82639	sub_T	70	no_sweep	0	AAK_g68989_79	in	UniRef100_R7K5V2	98.856	DNA-directed RNA polymerase subunit beta	1139	syn	K->K	ko:K03043	RNA_pol_Rpb2_1,RNA_pol_Rpb2_2,RNA_pol_Rpb2_3,RNA_pol_Rpb2_45,RNA_pol_Rpb2_6,RNA_pol_Rpb2_7	-	-	-	-	-	-	-	-
26	AAK_31	AAK_31_23	AAK	k77_221031	84071	sub_A	70	no_sweep	0	AAK_g68989_79	upstream	UniRef100_R7K5V2	98.856	DNA-directed RNA polymerase subunit beta	-293	undefined	undefined	ko:K03043	RNA_pol_Rpb2_1,RNA_pol_Rpb2_2,RNA_pol_Rpb2_3,RNA_pol_Rpb2_45,RNA_pol_Rpb2_6,RNA_pol_Rpb2_7	AAK_g68989_80	upstream	UniRef100_R7K5R5	100	S4 domain protein	-120	undefined	undefined	-	S4
26	AAK_31	AAK_31_24	AAK	k77_221031	85555	sub_A	70	no_sweep	0	AAK_g68989_81	downstream	UniRef100_R7K6Z1	99.7	2-C-methyl-D-erythritol 2,4-cyclodiphosphate synthase	1113	undefined	undefined	ko:K12506	IspD,YgbB	AAK_g68989_82	upstream	UniRef100_R7K998	96.7	Uncharacterized protein	-18	undefined	undefined
26	AAK_31	AAK_31_25	AAK	k77_221031	105143	sub_T	70	no_sweep	0	AAK_g68989_103	in	UniRef100_R7K7A5	99.7	Spore germination protein	929	syn	V->V	ko:K06296	Spore_permease	-	-	-	-	-	-	-	-
26	AAK_31	AAK_31_26	AAK	k77_221031	215173	sub_C	70	no_sweep	0	AAK_g68989_193	in	UniRef100_R7K9P0	97.3	Sugar (Glycoside-Pentoside-Hexuronide) transporter	1410	non_syn	T->A	ko:K03292,ko:K16210	MFS_2	-	-	-	-	-	-	-	-
26	AAK_31	AAK_31_27	AAK	k77_280814	12096	sub_A	70	no_sweep	0	AAK_g48680_8	in	UniRef100_R7K5H0	100	Pyruvate-flavodoxin oxidoreductase	401	syn	T->T	ko:K00169,ko:K03737	EKR,Fer4_16,Fer4_7,PFOR_II,POR,POR_N,TPP_enzyme_C	-	-	-	-	-	-	-	-
26	AAK_31	AAK_31_28	AAK	k77_325989	4698	sub_C	70	no_sweep	0	AAK_g24735_2	in	UniRef100_R7K4X3	93.99	von Willebrand factor type A	2495	syn	N->N	ko:K07114	BatA,GATase1_like,VWA,VWA_2,VWA_3	-	-	-	-	-	-	-	-
26	AAK_31	AAK_31_29	AAK	k77_36502	76931	sub_A	70	no_sweep	0	AAK_g7632_65	in	UniRef100_R7K6Q0	99.6	ABC transporter related protein	50	syn	K->K	ko:K01990	ABC_tran	-	-	-	-	-	-	-	-
26	AAK_31	AAK_31_30	AAK	k77_68480	174497	sub_C	70	no_sweep	0	AAK_g24463_175	in	UniRef100_R7K621	99.7	Uncharacterized protein	258	non_syn	Li->Vi			-	-	-	-	-	-	-	-
26	AAK_31	AAK_31_31	AAK	k77_69991	8691	sub_C	70	no_sweep	0	AAK_g47194_6	in	UniRef100_R7K9Y4	99.1	von Willebrand factor type A	2237	non_syn	L->Li	ko:K07114	BatA,GATase1_like,VWA,VWA_2,VWA_3	-	-	-	-	-	-	-	-
26	AAK_31	AAK_31_32	AAK	k77_69991	29305	sub_C	70	no_sweep	0	AAK_g47194_13	upstream	UniRef100_R7K7L5	99.2	Uncharacterized protein	-187	undefined	undefined	-	Flg_new	AAK_g47194_14	downstream	UniRef100_R7K6E6	98.2	HTH tetR-type domain-containing protein	767	undefined	undefined	-	TetR_N
26	AAK_31	AAK_31_33	AAK	k77_69991	29306	sub_A	70	no_sweep	0	AAK_g47194_13	upstream	UniRef100_R7K7L5	99.2	Uncharacterized protein	-188	undefined	undefined	-	Flg_new	AAK_g47194_14	downstream	UniRef100_R7K6E6	98.2	HTH tetR-type domain-containing protein	766	undefined	undefined	-	TetR_N
26	AAK_31	AAK_31_34	AAK	k77_108786	9244	sub_C	70	no_sweep	0	AAK_g12008_10	in	UniRef100_R7K3S4	100	Metal dependent phosphohydrolase	47	syn	R->R	ko:K07023,ko:K08722	HD_2,HD_3	-	-	-	-	-	-	-	-
26	AAK_31	AAK_31_35	AAK	k77_125554	192290	sub_C	70	no_sweep	0	AAK_g36818_166	in	UniRef100_A0A3D5PF30	97	Uncharacterized protein	4907	syn	V->V	-	Big_2,CAP,Flg_new	-	-	-	-	-	-	-	-
26	AAK_31	AAK_31_36	AAK	k77_190470	4654	sub_G	70	no_sweep	0	AAK_g1837_4	in	UniRef100_A0A3D5PF51	100	NAD-dependent malic enzyme	953	non_syn	L->Li	ko:K00027	Malic_M,malic	-	-	-	-	-	-	-	-
26	AAK_31	AAK_31_37	AAK	k77_190470	54635	sub_T	70	no_sweep	0	AAK_g1837_45	in	UniRef100_A0A316SKL8	100	Diaminopimelate epimerase	311	syn	S->S	ko:K01778	DAP_epimerase	-	-	-	-	-	-	-	-
26	AAK_31	AAK_31_38	AAK	k77_190470	55280	sub_T	70	no_sweep	0	AAK_g1837_46	in	UniRef100_R7K682	99.7	4-hydroxy-tetrahydrodipicolinate synthase	191	syn	V->V	ko:K01714	DHDPS	-	-	-	-	-	-	-	-
26	AAK_31	AAK_31_39	AAK	k77_190470	55310	sub_C	70	no_sweep	0	AAK_g1837_46	in	UniRef100_R7K682	99.7	4-hydroxy-tetrahydrodipicolinate synthase	221	syn	Ii->Ii	ko:K01714	DHDPS	-	-	-	-	-	-	-	-
26	AAK_31	AAK_31_40	AAK	k77_190470	55312	sub_C	70	no_sweep	0	AAK_g1837_46	in	UniRef100_R7K682	99.7	4-hydroxy-tetrahydrodipicolinate synthase	223	non_syn	V->A	ko:K01714	DHDPS	-	-	-	-	-	-	-	-
26	AAK_31	AAK_31_41	AAK	k77_190470	55328	sub_T	70	no_sweep	0	AAK_g1837_46	in	UniRef100_R7K682	99.7	4-hydroxy-tetrahydrodipicolinate synthase	239	syn	F->F	ko:K01714	DHDPS	-	-	-	-	-	-	-	-
26	AAK_31	AAK_31_42	AAK	k77_190470	57009	sub_A	70	no_sweep	0	AAK_g1837_48	in	UniRef100_A0A3D5PF09	98.3	2,3,4,5-tetrahydropyridine-2,6-dicarboxylate N-acetyltransferase	318	non_syn	H->N	ko:K00674,ko:K05822	DapH_N,Hexapep	-	-	-	-	-	-	-	-
26	AAK_31	AAK_31_43	AAK	k77_190470	59424	sub_G	70	no_sweep	0	AAK_g1837_50	in	UniRef100_A0A316SJ84	99.5	Uncharacterized protein	1067	syn	A->A	-	M20_dimer,Peptidase_M20	-	-	-	-	-	-	-	-
26	AAK_31	AAK_31_44	AAK	k77_190470	66238	sub_T	70	no_sweep	0	AAK_g1837_55	in	UniRef100_A0A3D5PEC5	97.9	Uncharacterized protein	616	non_syn	G->D	-	LRR_5	-	-	-	-	-	-	-	-
26	AAK_31	AAK_31_45	AAK	k77_190470	66254	sub_T	70	no_sweep	0	AAK_g1837_55	in	UniRef100_A0A3D5PEC5	97.9	Uncharacterized protein	600	non_syn	R->S	-	LRR_5	-	-	-	-	-	-	-	-
26	AAK_31	AAK_31_46	AAK	k77_221031	31940	sub_G	70	no_sweep	0	AAK_g68989_30	in	UniRef100_A0A316SLJ9	99.7	SAM-dependent methyltransferase	476	syn	S->S	ko:K06969	Methyltrans_SAM	-	-	-	-	-	-	-	-
26	AAK_31	AAK_31_47	AAK	k77_221031	126458	sub_G	70	no_sweep	0	AAK_g68989_125	in	UniRef100_R7K5Z0	99.4	Subtilisin-like serine protease	2566	non_syn	Vi->A	ko:K01361	Big_2,CBM_X2,CW_binding_1,LRR_5,PA,Peptidase_S8,SLH,fn3_5	-	-	-	-	-	-	-	-
26	AAK_31	AAK_31_48	AAK	k77_221031	141702	sub_T	70	no_sweep	0	AAK_g68989_137	in	UniRef100_A0A3D5PCH4	99.8	Thymidine phosphorylase	396	non_syn	E->K	ko:K00756,ko:K00758	Glycos_trans_3N,Glycos_transf_3,PYNP_C	-	-	-	-	-	-	-	-
26	AAK_31	AAK_31_49	AAK	k77_221031	176657	sub_T	70	no_sweep	0	AAK_g68989_164	in	UniRef100_A0A316SQA4	100	D-lysine 5,6-aminomutase subunit alpha	1184	non_syn	Vi->V	ko:K01844	Lys-AminoMut_A	-	-	-	-	-	-	-	-
26	AAK_31	AAK_31_50	AAK	k77_221031	176660	sub_G	70	no_sweep	0	AAK_g68989_164	in	UniRef100_A0A316SQA4	100	D-lysine 5,6-aminomutase subunit alpha	1187	syn	T->T	ko:K01844	Lys-AminoMut_A	-	-	-	-	-	-	-	-
26	AAK_31	AAK_31_51	AAK	k77_221031	182522	sub_C	70	no_sweep	0	AAK_g68989_168	in	UniRef100_R7K9L0	99.1	Conserved repeat protein	674	syn	A->A	-	Cadherin-like,SLH	-	-	-	-	-	-	-	-
26	AAK_31	AAK_31_52	AAK	k77_221031	200900	sub_C	70	no_sweep	0	AAK_g68989_177	in	UniRef100_R7K7C6	98.822	Uncharacterized protein	69	non_syn	S->G	-	Hydrolase_3	-	-	-	-	-	-	-	-
26	AAK_31	AAK_31_53	AAK	k77_221031	204042	sub_C	70	no_sweep	0	AAK_g68989_181	in	UniRef100_R7K648	99.2	Alanine racemase	297	non_syn	Ii->V	ko:K01775	Ala_racemase_C,Ala_racemase_N	-	-	-	-	-	-	-	-
26	AAK_31	AAK_31_54	AAK	k77_221031	212975	sub_A	70	no_sweep	0	AAK_g68989_190	in	UniRef100_R7K674	98.7	Ribosomal RNA large subunit methyltransferase H	344	syn	D->D	ko:K00783	SPOUT_MTase	-	-	-	-	-	-	-	-
26	AAK_31	AAK_31_55	AAK	k77_280814	5410	del_2	70	no_sweep	0	AAK_g48680_3	downstream	UniRef100_R7K4D1	98.5	Uncharacterized protein	881	undefined	undefined			AAK_g48680_4	upstream	UniRef100_A0A3D5PCX3	100	tRNA (guanine-N(7)-)-methyltransferase	-104	undefined	undefined	ko:K03439	Methyltransf_4
26	AAK_31	AAK_31_56	AAK	k77_280814	8160	sub_G	70	no_sweep	0	AAK_g48680_7	in	UniRef100_A0A3D5PDF7	30.7	BclB domain-containing protein	888	non_syn	P->A			-	-	-	-	-	-	-	-
26	AAK_31	AAK_31_57	AAK	k77_280814	8162	sub_A	70	no_sweep	0	AAK_g48680_7	in	UniRef100_A0A3D5PDF7	30.7	BclB domain-containing protein	890	syn	P->P			-	-	-	-	-	-	-	-
26	AAK_31	AAK_31_58	AAK	k77_317437	2518	sub_T	70	no_sweep	0	AAK_g46667_1	in	UniRef100_R7K7W0	43.24	Uncharacterized protein	1056	non_syn	V->Ii	ko:K20276	CHRD,CHU_C,SprB	-	-	-	-	-	-	-	-
26	AAK_31	AAK_31_59	AAK	k77_317437	5882	sub_G	70	no_sweep	0	AAK_g46667_2	in	UniRef100_A0A3D5PEE8	60.751	Uncharacterized protein	2096	syn	T->T	-	Big_2	-	-	-	-	-	-	-	-
26	AAK_31	AAK_31_60	AAK	k77_317437	5883	sub_C	70	no_sweep	0	AAK_g46667_2	in	UniRef100_A0A3D5PEE8	60.751	Uncharacterized protein	2095	non_syn	T->S	-	Big_2	-	-	-	-	-	-	-	-
26	AAK_31	AAK_31_61	AAK	k77_36502	32699	sub_A	70	no_sweep	0	AAK_g7632_32	in	UniRef100_A0A316SL15	64.95	Uncharacterized protein	593	non_syn	Li->L	ko:K05970	Big_2,Big_3,F5_F8_type_C,Flg_new,LRR_5,SLH,fn3	-	-	-	-	-	-	-	-
26	AAK_31	AAK_31_62	AAK	k77_36502	32708	sub_T	70	no_sweep	0	AAK_g7632_32	in	UniRef100_A0A316SL15	64.95	Uncharacterized protein	602	syn	P->P	ko:K05970	Big_2,Big_3,F5_F8_type_C,Flg_new,LRR_5,SLH,fn3	-	-	-	-	-	-	-	-
26	AAK_31	AAK_31_63	AAK	k77_36502	32732	sub_G	70	no_sweep	0	AAK_g7632_32	in	UniRef100_A0A316SL15	64.95	Uncharacterized protein	626	syn	A->A	ko:K05970	Big_2,Big_3,F5_F8_type_C,Flg_new,LRR_5,SLH,fn3	-	-	-	-	-	-	-	-
26	AAK_31	AAK_31_64	AAK	k77_36502	32735	sub_G	70	no_sweep	0	AAK_g7632_32	in	UniRef100_A0A316SL15	64.95	Uncharacterized protein	629	syn	G->G	ko:K05970	Big_2,Big_3,F5_F8_type_C,Flg_new,LRR_5,SLH,fn3	-	-	-	-	-	-	-	-
26	AAK_31	AAK_31_65	AAK	k77_36502	32744	sub_A	70	no_sweep	0	AAK_g7632_32	in	UniRef100_A0A316SL15	64.95	Uncharacterized protein	638	non_syn	Mi->Ii	ko:K05970	Big_2,Big_3,F5_F8_type_C,Flg_new,LRR_5,SLH,fn3	-	-	-	-	-	-	-	-
26	AAK_31	AAK_31_66	AAK	k77_36502	32762	sub_T	70	no_sweep	0	AAK_g7632_32	in	UniRef100_A0A316SL15	64.95	Uncharacterized protein	656	syn	A->A	ko:K05970	Big_2,Big_3,F5_F8_type_C,Flg_new,LRR_5,SLH,fn3	-	-	-	-	-	-	-	-
26	AAK_31	AAK_31_67	AAK	k77_36502	32808	sub_A	70	no_sweep	0	AAK_g7632_32	in	UniRef100_A0A316SL15	64.95	Uncharacterized protein	702	non_syn	V->Ii	ko:K05970	Big_2,Big_3,F5_F8_type_C,Flg_new,LRR_5,SLH,fn3	-	-	-	-	-	-	-	-
26	AAK_31	AAK_31_68	AAK	k77_68480	134921	sub_A	70	no_sweep	0	AAK_g24463_132	upstream	UniRef100_R7K5Y9	100	Sporulation protein YqfC	-20	undefined	undefined	-	YabP	AAK_g24463_133	downstream	UniRef100_R7K4S7	96.4	NYN domain-containing protein	842	undefined	undefined	-	NYN,OST-HTH
26	AAK_31	AAK_31_69	AAK	k77_69991	27298	sub_G	70	no_sweep	0	AAK_g47194_13	in	UniRef100_R7K7L5	99.2	Uncharacterized protein	1820	syn	H->H	-	Flg_new	-	-	-	-	-	-	-	-
26	AAK_31	AAK_31_70	AAK	k77_69991	27307	sub_A	70	no_sweep	0	AAK_g47194_13	in	UniRef100_R7K7L5	99.2	Uncharacterized protein	1811	syn	Y->Y	-	Flg_new	-	-	-	-	-	-	-	-
27	AAK_32	AAK_32_1	AAK	k77_192306	9904	ins_TTGTATGCTTTT	1	no_sweep	0	AAK_g27370_7	upstream	UniRef100_R7CA87	100	LysM domain protein	-37	undefined	undefined	ko:K06306	Glyco_hydro_18,LysM	-	-	-	-	-	-	-	-
28	AAK_33	AAK_33_1	AAK	k77_211870	1544	sub_T	17	sweep	0	AAK_g12404_4	in	UniRef100_U2QL11	99.5	DNA-binding helix-turn-helix protein	227	syn	L->L	-	HTH_3	-	-	-	-	-	-	-	-
28	AAK_33	AAK_33_2	AAK	k77_211870	7562	sub_A	17	sweep	0	AAK_g12404_11	downstream	UniRef100_A0A1C6F5M8	100	Biotin transporter	575	undefined	undefined	ko:K03523	BioY	AAK_g12404_12	upstream	UniRef100_UPI000E65E9B8	100	citrate transporter	-73	undefined	undefined	-	CitMHS
28	AAK_33	AAK_33_3	AAK	k77_211870	7600	sub_G	17	sweep	0	AAK_g12404_11	downstream	UniRef100_A0A1C6F5M8	100	Biotin transporter	613	undefined	undefined	ko:K03523	BioY	AAK_g12404_12	upstream	UniRef100_UPI000E65E9B8	100	citrate transporter	-35	undefined	undefined	-	CitMHS
28	AAK_33	AAK_33_4	AAK	k77_211870	7666	sub_C	17	sweep	0	AAK_g12404_12	in	UniRef100_UPI000E65E9B8	100	citrate transporter	31	non_syn	Vi->A	-	CitMHS	-	-	-	-	-	-	-	-
28	AAK_33	AAK_33_5	AAK	k77_211870	7688	sub_C	17	sweep	0	AAK_g12404_12	in	UniRef100_UPI000E65E9B8	100	citrate transporter	53	syn	L->L	-	CitMHS	-	-	-	-	-	-	-	-
28	AAK_33	AAK_33_6	AAK	k77_211870	7819	sub_A	17	sweep	0	AAK_g12404_12	in	UniRef100_UPI000E65E9B8	100	citrate transporter	184	non_syn	R->Q	-	CitMHS	-	-	-	-	-	-	-	-
28	AAK_33	AAK_33_7	AAK	k77_211870	8160	sub_G	17	sweep	0	AAK_g12404_12	in	UniRef100_UPI000E65E9B8	100	citrate transporter	525	non_syn	T->A	-	CitMHS	-	-	-	-	-	-	-	-
28	AAK_33	AAK_33_8	AAK	k77_211870	8342	sub_G	17	sweep	0	AAK_g12404_12	in	UniRef100_UPI000E65E9B8	100	citrate transporter	707	syn	E->E	-	CitMHS	-	-	-	-	-	-	-	-
28	AAK_33	AAK_33_9	AAK	k77_211870	8346	sub_A	17	sweep	0	AAK_g12404_12	in	UniRef100_UPI000E65E9B8	100	citrate transporter	711	non_syn	A->T	-	CitMHS	-	-	-	-	-	-	-	-
28	AAK_33	AAK_33_10	AAK	k77_211870	8472	sub_T	17	sweep	0	AAK_g12404_12	in	UniRef100_UPI000E65E9B8	100	citrate transporter	837	syn	Li->Li	-	CitMHS	-	-	-	-	-	-	-	-
28	AAK_33	AAK_33_11	AAK	k77_211870	8543	sub_G	17	sweep	0	AAK_g12404_12	in	UniRef100_UPI000E65E9B8	100	citrate transporter	908	syn	T->T	-	CitMHS	-	-	-	-	-	-	-	-
28	AAK_33	AAK_33_12	AAK	k77_211870	9124	sub_T	17	sweep	0	AAK_g12404_13	in	UniRef100_A0A1C5UQT8	99.4	Protein of uncharacterized function DUF45	218	syn	T->T	ko:K07043	DUF45	-	-	-	-	-	-	-	-
28	AAK_33	AAK_33_13	AAK	k77_211870	9468	sub_A	17	sweep	0	AAK_g12404_13	upstream	UniRef100_A0A1C5UQT8	99.4	Protein of uncharacterized function DUF45	-126	undefined	undefined	ko:K07043	DUF45	AAK_g12404_14	upstream	UniRef100_UPI000428C37C	94.084	phosphoketolase family protein	-51	undefined	undefined	ko:K01621	XFP,XFP_C,XFP_N
28	AAK_33	AAK_33_14	AAK	k77_211870	9512	sub_T	17	sweep	0	AAK_g12404_13	upstream	UniRef100_A0A1C5UQT8	99.4	Protein of uncharacterized function DUF45	-170	undefined	undefined	ko:K07043	DUF45	AAK_g12404_14	upstream	UniRef100_UPI000428C37C	94.084	phosphoketolase family protein	-7	undefined	undefined	ko:K01621	XFP,XFP_C,XFP_N
28	AAK_33	AAK_33_15	AAK	k77_211870	10118	sub_C	17	sweep	0	AAK_g12404_14	in	UniRef100_UPI000428C37C	94.084	phosphoketolase family protein	599	syn	T->T	ko:K01621	XFP,XFP_C,XFP_N	-	-	-	-	-	-	-	-
28	AAK_33	AAK_33_16	AAK	k77_211870	10487	sub_A	17	sweep	0	AAK_g12404_14	in	UniRef100_UPI000428C37C	94.084	phosphoketolase family protein	968	syn	R->R	ko:K01621	XFP,XFP_C,XFP_N	-	-	-	-	-	-	-	-
28	AAK_33	AAK_33_17	AAK	k77_211870	10767	sub_C	17	sweep	0	AAK_g12404_14	in	UniRef100_UPI000428C37C	94.084	phosphoketolase family protein	1248	non_syn	Mi->Li	ko:K01621	XFP,XFP_C,XFP_N	-	-	-	-	-	-	-	-
29	AAK_36	AAK_36_1	AAK	k77_314561	14827	sub_A	1	sweep	87	AAK_g10458_11	in	UniRef100_A0A2V2CSK6	99.9	DNA gyrase subunit A	292	non_syn	D->V	ko:K02469	DNA_gyraseA_C,DNA_topoisoIV	-	-	-	-	-	-	-	-
29	AAK_36	AAK_36_2	AAK	k77_50657	18479	dangleRight_SINGLE|+	4	no_sweep	0	AAK_g61839_22	in	UniRef100_A0A2V2CN15	100	V-type ATP synthase subunit D	426	unknown	unknown	ko:K02120	ATP-synt_D	-	-	-	-	-	-	-	-
29	AAK_36	AAK_36_3	AAK	k77_250386	1322	sub_A	4	no_sweep	0	-	-	-	-	-	-	-	-			-	-	-	-	-	-	-	-
29	AAK_36	AAK_36_4	AAK	k77_250386	1532	sub_G	4	no_sweep	0	-	-	-	-	-	-	-	-			-	-	-	-	-	-	-	-
29	AAK_36	AAK_36_5	AAK	k77_250386	1543	sub_C	4	no_sweep	0	-	-	-	-	-	-	-	-			-	-	-	-	-	-	-	-
30	AAK_42	AAK_42_1	AAK	k77_66226	1124	sub_G	2	no_sweep	0	AAK_g64443_2	in	UniRef100_A0A2K4ZK28	99.1	Transcriptional repressor DicA	527	syn	E->E	-	HTH_3,HTH_31	-	-	-	-	-	-	-	-
30	AAK_42	AAK_42_2	AAK	k77_66226	1133	sub_A	2	no_sweep	0	AAK_g64443_2	in	UniRef100_A0A2K4ZK28	99.1	Transcriptional repressor DicA	536	syn	K->K	-	HTH_3,HTH_31	-	-	-	-	-	-	-	-
31	AAK_43	AAK_43_1	AAK	k77_225781	9587	sub_G	1	no_sweep	0	AAK_g57227_7	downstream	UniRef100_A0A3R6MR62	100	Uncharacterized protein	2817	undefined	undefined	ko:K01421	-	AAK_g57227_8	upstream	UniRef100_A0A3R6Q7Q7	100	Threonine--tRNA ligase	-824	undefined	undefined	ko:K01868	HGTP_anticodon,TGS,tRNA-synt_2b,tRNA_SAD
32	AAK_45	AAK_45_1	AAK	k77_311130	381	sub_G	1	no_sweep	0	AAK_g36001_1	in	UniRef100_UPI0009311520	68.988	MATE family efflux transporter	380	syn	A->A	-	MatE	-	-	-	-	-	-	-	-
33	AAK_52	AAK_52_1	AAK	k77_143538	229	sub_G	1	no_sweep	0	AAK_g64171_1	in	UniRef100_K1TNX1	20.444	DNA methylase (Fragment)	233	syn	R->R	-	Helicase_C,MutS_I,N6_Mtase,ResIII,SNF2_N	-	-	-	-	-	-	-	-
34	AAK_60	AAK_60_1	AAK	k77_192231	416	sub_T	4	no_sweep	0	AAK_g26579_2	in	UniRef100_A0A415WBX1	99.3	ParA family protein	599	syn	E->E	-	AAA_31	-	-	-	-	-	-	-	-
34	AAK_60	AAK_60_2	AAK	k77_192231	440	sub_T	4	no_sweep	0	AAK_g26579_2	in	UniRef100_A0A415WBX1	99.3	ParA family protein	575	syn	T->T	-	AAA_31	-	-	-	-	-	-	-	-
34	AAK_60	AAK_60_3	AAK	k77_97957	1548	sub_T	4	no_sweep	0	AAK_g2803_2	in	UniRef100_UPI00136F1DFE	99	TIM barrel protein	389	syn	A->A	ko:K06606	AP_endonuc_2	-	-	-	-	-	-	-	-
34	AAK_60	AAK_60_4	AAK	k77_97957	2703	sub_A	4	no_sweep	0	AAK_g2803_4	in	UniRef100_A0A1C6I2I7	99.3	Uncharacterized protein	1079	syn	D->D	ko:K07133	AAA_14,DUF4143	-	-	-	-	-	-	-	-
35	AAK_61	AAK_61_1	AAK	k77_103041	6965	sub_T	29	no_sweep	0	AAK_g3714_8	in	UniRef100_F0HQA0	100	Adenylosuccinate synthetase	611	syn	A->A	ko:K01939	Adenylsucc_synt	-	-	-	-	-	-	-	-
35	AAK_61	AAK_61_2	AAK	k77_133349	3760	sub_T	29	no_sweep	0	AAK_g67763_5	in	UniRef100_C8WL42	98.6	4-hydroxy-3-methylbut-2-en-1-yl diphosphate synthase (flavodoxin)	449	syn	L->L	ko:K03526	GcpE	-	-	-	-	-	-	-	-
35	AAK_61	AAK_61_3	AAK	k77_148214	2251	sub_C	29	no_sweep	0	AAK_g62747_3	in	UniRef100_F0HJJ4	100	UDP-N-acetylglucosamine--N-acetylmuramyl-(pentapeptide) pyrophosphoryl-undecaprenol N-acetylglucosamine transferase	786	non_syn	Ii->V	ko:K02563	Glyco_tran_28_C,Glyco_transf_28	-	-	-	-	-	-	-	-
35	AAK_61	AAK_61_4	AAK	k77_180758	1694	sub_C	29	no_sweep	0	AAK_g10519_2	in	UniRef100_F0HMQ2	100	ErfK/YbiS/YcfS/YnhG	323	syn	S->S	-	PG_binding_4,YkuD	-	-	-	-	-	-	-	-
35	AAK_61	AAK_61_5	AAK	k77_194583	3619	sub_T	29	no_sweep	0	AAK_g58453_6	in	UniRef100_F0HKH8	100	Peptidase, A24 family	315	non_syn	P->S	-	Peptidase_A24	-	-	-	-	-	-	-	-
35	AAK_61	AAK_61_6	AAK	k77_310985	7669	sub_A	29	no_sweep	0	AAK_g34482_7	upstream	UniRef100_F0HQY3	100	DNA binding domain protein, excisionase family	-116	undefined	undefined	-	HTH_17	AAK_g34482_8	upstream	UniRef100_F0HQY2	100	dTTP/UTP pyrophosphatase	-198	undefined	undefined	ko:K06287	Maf
35	AAK_61	AAK_61_7	AAK	k77_31323	1627	sub_A	29	no_sweep	0	AAK_g6717_3	in	UniRef100_F0HP09	100	Phytoene desaturase	1338	non_syn	G->W	ko:K10027	Amino_oxidase	-	-	-	-	-	-	-	-
35	AAK_61	AAK_61_8	AAK	k77_325805	2613	sub_A	29	no_sweep	0	AAK_g22335_2	in	UniRef100_F0HQP8	96.937	Peptidase, S8/S53 family	2307	syn	Li->Li	-	Peptidase_S8,TIG	-	-	-	-	-	-	-	-
35	AAK_61	AAK_61_9	AAK	k77_73192	7372	sub_A	29	no_sweep	0	AAK_g13205_8	in	UniRef100_A0A369MQ20	100	Bifunctional protein FolD	752	non_syn	Vi->V	ko:K01491	THF_DHG_CYH,THF_DHG_CYH_C	-	-	-	-	-	-	-	-
35	AAK_61	AAK_61_10	AAK	k77_73192	7527	sub_G	29	no_sweep	0	AAK_g13205_8	in	UniRef100_A0A369MQ20	100	Bifunctional protein FolD	597	non_syn	C->R	ko:K01491	THF_DHG_CYH,THF_DHG_CYH_C	-	-	-	-	-	-	-	-
35	AAK_61	AAK_61_11	AAK	k77_184099	2767	sub_C	29	sweep	0	AAK_g56765_5	in	UniRef100_A0A369MNG2	55.809	FAD-dependent oxidoreductase (Fragment)	233	non_syn	L->Li	ko:K00313	DAO	-	-	-	-	-	-	-	-
35	AAK_61	AAK_61_12	AAK	k77_184099	2463	sub_T	29	no_sweep	0	AAK_g56765_4	in	UniRef100_A0A369MX27	100	Ferredoxin family protein	49	non_syn	L->H	-	Fer4_9	-	-	-	-	-	-	-	-
35	AAK_61	AAK_61_13	AAK	k77_184099	2466	sub_C	29	no_sweep	0	AAK_g56765_4	in	UniRef100_A0A369MX27	100	Ferredoxin family protein	46	non_syn	A->G	-	Fer4_9	-	-	-	-	-	-	-	-
35	AAK_61	AAK_61_14	AAK	k77_184099	2470	sub_A	29	no_sweep	0	AAK_g56765_4	in	UniRef100_A0A369MX27	100	Ferredoxin family protein	42	syn	Li->Li	-	Fer4_9	-	-	-	-	-	-	-	-
35	AAK_61	AAK_61_15	AAK	k77_184099	2610	sub_C	29	no_sweep	0	AAK_g56765_5	in	UniRef100_A0A369MNG2	55.809	FAD-dependent oxidoreductase (Fragment)	390	non_syn	K->E	ko:K00313	DAO	-	-	-	-	-	-	-	-
35	AAK_61	AAK_61_16	AAK	k77_184099	2611	sub_G	29	no_sweep	0	AAK_g56765_5	in	UniRef100_A0A369MNG2	55.809	FAD-dependent oxidoreductase (Fragment)	389	syn	G->G	ko:K00313	DAO	-	-	-	-	-	-	-	-
35	AAK_61	AAK_61_17	AAK	k77_184099	2684	sub_T	29	no_sweep	0	AAK_g56765_5	in	UniRef100_A0A369MNG2	55.809	FAD-dependent oxidoreductase (Fragment)	316	non_syn	G->D	ko:K00313	DAO	-	-	-	-	-	-	-	-
35	AAK_61	AAK_61_18	AAK	k77_184099	2685	sub_T	29	no_sweep	0	AAK_g56765_5	in	UniRef100_A0A369MNG2	55.809	FAD-dependent oxidoreductase (Fragment)	315	non_syn	G->S	ko:K00313	DAO	-	-	-	-	-	-	-	-
35	AAK_61	AAK_61_19	AAK	k77_184099	2692	sub_C	29	no_sweep	0	AAK_g56765_5	in	UniRef100_A0A369MNG2	55.809	FAD-dependent oxidoreductase (Fragment)	308	non_syn	V->Vi	ko:K00313	DAO	-	-	-	-	-	-	-	-
35	AAK_61	AAK_61_20	AAK	k77_184099	2695	sub_A	29	no_sweep	0	AAK_g56765_5	in	UniRef100_A0A369MNG2	55.809	FAD-dependent oxidoreductase (Fragment)	305	syn	H->H	ko:K00313	DAO	-	-	-	-	-	-	-	-
35	AAK_61	AAK_61_21	AAK	k77_184099	2708	sub_C	29	no_sweep	0	AAK_g56765_5	in	UniRef100_A0A369MNG2	55.809	FAD-dependent oxidoreductase (Fragment)	292	non_syn	S->C	ko:K00313	DAO	-	-	-	-	-	-	-	-
35	AAK_61	AAK_61_22	AAK	k77_184099	2709	sub_T	29	no_sweep	0	AAK_g56765_5	in	UniRef100_A0A369MNG2	55.809	FAD-dependent oxidoreductase (Fragment)	291	non_syn	S->T	ko:K00313	DAO	-	-	-	-	-	-	-	-
35	AAK_61	AAK_61_23	AAK	k77_184099	2766	sub_A	29	no_sweep	0	AAK_g56765_5	in	UniRef100_A0A369MNG2	55.809	FAD-dependent oxidoreductase (Fragment)	234	non_syn	A->S	ko:K00313	DAO	-	-	-	-	-	-	-	-
35	AAK_61	AAK_61_24	AAK	k77_194583	11549	sub_T	29	no_sweep	0	AAK_g58453_16	in	UniRef100_F0HKG8	100	Repeat protein	799	non_syn	A->Vi	-	-	-	-	-	-	-	-	-	-
35	AAK_61	AAK_61_25	AAK	k77_25201	2661	sub_A	29	no_sweep	0	AAK_g66077_2	in	UniRef100_A0A369NM56	99.7	FAD-binding dehydrogenase	1196	syn	R->R	-	FAD_binding_2	-	-	-	-	-	-	-	-
35	AAK_61	AAK_61_26	AAK	k77_295733	1806	sub_G	29	no_sweep	0	AAK_g33551_3	in	UniRef100_F0HQW1	99.6	TIGR03084 family protein	552	non_syn	S->P	-	MDMPI_N	-	-	-	-	-	-	-	-
35	AAK_61	AAK_61_27	AAK	k77_295733	4385	sub_G	29	no_sweep	0	AAK_g33551_5	in	UniRef100_UPI000A3CE2A9	90.371	AMP-binding protein	1529	syn	D->D	-	AMP-binding,AMP-binding_C,Lactamase_B	-	-	-	-	-	-	-	-
35	AAK_61	AAK_61_28	AAK	k77_295733	5090	sub_C	29	no_sweep	0	AAK_g33551_5	in	UniRef100_UPI000A3CE2A9	90.371	AMP-binding protein	824	non_syn	V->Vi	-	AMP-binding,AMP-binding_C,Lactamase_B	-	-	-	-	-	-	-	-
35	AAK_61	AAK_61_29	AAK	k77_8831	1077	sub_T	29	no_sweep	0	AAK_g50726_2	in	UniRef100_C8WJB1	99.6	M6 family metalloprotease domain protein	780	syn	L->L	-	-	-	-	-	-	-	-	-	-
36	AAK_69	AAK_69_1	AAK	k77_13838	2202	sub_T	1	no_sweep	0	AAK_g48730_4	in	UniRef100_A0A351MXE6	46.211	Acyl-CoA dehydrogenase (Fragment)	176	syn	Y->Y	ko:K00248	Acyl-CoA_dh_1,Acyl-CoA_dh_M,Acyl-CoA_dh_N	-	-	-	-	-	-	-	-
37	AAK_71	AAK_71_1	AAK	k77_191451	2431	sub_A	1	no_sweep	0	AAK_g16937_5	in	UniRef100_G9R7P6	100	Y1_Tnp domain-containing protein	145	non_syn	R->K	ko:K07491	Y1_Tnp	-	-	-	-	-	-	-	-
38	AAK_78	AAK_78_1	AAK	k77_98096	9420	sub_A	1	no_sweep	0	AAK_g5822_10	in	UniRef100_UPI0012CD2AAF	85.928	recombinase family protein	542	syn	R->R	-	Recombinase,Resolvase,Zn_ribbon_recom	-	-	-	-	-	-	-	-
39	AAQ_1	AAQ_1_1	AAQ	k77_123546	14979	sub_T	224	no_sweep	0	AAQ_g88449_15	in	UniRef100_A0A173UV28	100	Lipoprotein lplA	1106	syn	G->G	ko:K17318	SBP_bac_1,SBP_bac_8,TAT_signal	-	-	-	-	-	-	-	-
39	AAQ_1	AAQ_1_2	AAQ	k77_123546	14988	sub_G	224	no_sweep	0	AAQ_g88449_15	in	UniRef100_A0A173UV28	100	Lipoprotein lplA	1097	syn	F->F	ko:K17318	SBP_bac_1,SBP_bac_8,TAT_signal	-	-	-	-	-	-	-	-
39	AAQ_1	AAQ_1_3	AAQ	k77_106111	18196	sub_T	224	no_sweep	0	AAQ_g50896_16	in	UniRef100_C4ZF09	99.8	Sodium/proline symporter	1136	syn	A->A	ko:K03307,ko:K11928	SSF	-	-	-	-	-	-	-	-
39	AAQ_1	AAQ_1_4	AAQ	k77_106111	18219	sub_A	224	no_sweep	0	AAQ_g50896_16	in	UniRef100_C4ZF09	99.8	Sodium/proline symporter	1113	non_syn	A->S	ko:K03307,ko:K11928	SSF	-	-	-	-	-	-	-	-
39	AAQ_1	AAQ_1_5	AAQ	k77_106111	19470	sub_G	224	no_sweep	0	AAQ_g50896_16	upstream	UniRef100_C4ZF09	99.8	Sodium/proline symporter	-138	undefined	undefined	ko:K03307,ko:K11928	SSF	AAQ_g50896_17	upstream	UniRef100_A0A0M6WMX0	100	Calcium/sodium antiporter	-210	undefined	undefined	-	Na_Ca_ex
39	AAQ_1	AAQ_1_6	AAQ	k77_106111	30582	sub_A	224	no_sweep	0	AAQ_g50896_24	in	UniRef100_A0A0M6WN26	99	Peptidoglycan N-acetylglucosamine deacetylase	797	syn	V->V	-	DUF5011,Polysacc_deac_1	-	-	-	-	-	-	-	-
39	AAQ_1	AAQ_1_7	AAQ	k77_106111	30681	sub_G	224	no_sweep	0	AAQ_g50896_24	in	UniRef100_A0A0M6WN26	99	Peptidoglycan N-acetylglucosamine deacetylase	896	syn	G->G	-	DUF5011,Polysacc_deac_1	-	-	-	-	-	-	-	-
39	AAQ_1	AAQ_1_8	AAQ	k77_106111	30684	sub_A	224	no_sweep	0	AAQ_g50896_24	in	UniRef100_A0A0M6WN26	99	Peptidoglycan N-acetylglucosamine deacetylase	899	syn	L->L	-	DUF5011,Polysacc_deac_1	-	-	-	-	-	-	-	-
39	AAQ_1	AAQ_1_9	AAQ	k77_123546	20934	sub_T	224	no_sweep	0	AAQ_g88449_20	in	UniRef100_A0A3E5APR5	99.8	MATE family efflux transporter	1329	non_syn	V->Ii	-	MatE	-	-	-	-	-	-	-	-
39	AAQ_1	AAQ_1_10	AAQ	k77_123546	24114	sub_T	224	no_sweep	0	AAQ_g88449_22	in	UniRef100_A0A0M6WCF2	99.7	Catabolite control protein A	623	syn	G->G	ko:K02529	LacI,Peripla_BP_3	-	-	-	-	-	-	-	-
39	AAQ_1	AAQ_1_11	AAQ	k77_137059	2794	sub_G	224	no_sweep	0	AAQ_g73134_2	in	UniRef100_A0A348SAF5	98.7	DNA topoisomerase III	1961	syn	R->R	ko:K03169	Topoisom_bac,Toprim,Toprim_Crpt	-	-	-	-	-	-	-	-
39	AAQ_1	AAQ_1_12	AAQ	k77_137059	6120	sub_C	224	no_sweep	0	AAQ_g73134_4	in	UniRef100_A0A0M6WL41	100	Uncharacterized protein	269	non_syn	D->E	-	MatE	-	-	-	-	-	-	-	-
39	AAQ_1	AAQ_1_13	AAQ	k77_142203	26092	sub_T	224	no_sweep	0	AAQ_g41608_24	in	UniRef100_A0A0M6WLJ0	91.363	Sporulation protein SpoIID	470	syn	S->S	ko:K06381	SpoIID	-	-	-	-	-	-	-	-
39	AAQ_1	AAQ_1_14	AAQ	k77_196738	8058	sub_T	224	no_sweep	0	AAQ_g87282_7	in	UniRef100_A0A0M6WLU5	99.2	Uncharacterized protein	534	syn	Li->Li	ko:K06383	Peptidase_U4	-	-	-	-	-	-	-	-
39	AAQ_1	AAQ_1_15	AAQ	k77_200153	33307	sub_T	224	no_sweep	0	AAQ_g30661_30	in	UniRef100_A0A0M6WIF2	100	Guanylate kinase	587	non_syn	Li->L	ko:K00942	Guanylate_kin	-	-	-	-	-	-	-	-
39	AAQ_1	AAQ_1_16	AAQ	k77_208245	8677	sub_A	224	no_sweep	0	AAQ_g43545_7	in	UniRef100_A0A0M6WM40	100	3-phosphoglycerate dehydrogenase	5	syn	F->F	ko:K00058	2-Hacid_dh,2-Hacid_dh_C	-	-	-	-	-	-	-	-
39	AAQ_1	AAQ_1_17	AAQ	k77_208245	19941	sub_G	224	no_sweep	0	AAQ_g43545_16	in	UniRef100_A0A3E4EHJ9	98.7	ABC transporter permease	2088	non_syn	Ii->L	-	-	-	-	-	-	-	-	-	-
39	AAQ_1	AAQ_1_18	AAQ	k77_208245	19942	sub_A	224	no_sweep	0	AAQ_g43545_16	in	UniRef100_A0A3E4EHJ9	98.7	ABC transporter permease	2087	syn	L->L	-	-	-	-	-	-	-	-	-	-
39	AAQ_1	AAQ_1_19	AAQ	k77_208245	19954	sub_T	224	no_sweep	0	AAQ_g43545_16	in	UniRef100_A0A3E4EHJ9	98.7	ABC transporter permease	2075	non_syn	F->L	-	-	-	-	-	-	-	-	-	-
39	AAQ_1	AAQ_1_20	AAQ	k77_210323	21303	sub_T	224	no_sweep	0	AAQ_g71830_17	in	UniRef100_A0A174IKN9	99.103	Spore germination protein (Amino acid permease)	1643	syn	G->G	-	Spore_permease	-	-	-	-	-	-	-	-
39	AAQ_1	AAQ_1_21	AAQ	k77_219083	4641	sub_T	224	no_sweep	0	AAQ_g93120_6	in	UniRef100_C4Z8N3	97.502	Riboflavin biosynthesis protein RibD	218	non_syn	D->E	ko:K11752	RibD_C,dCMP_cyt_deam_1	-	-	-	-	-	-	-	-
39	AAQ_1	AAQ_1_22	AAQ	k77_219083	4651	sub_T	224	no_sweep	0	AAQ_g93120_6	in	UniRef100_C4Z8N3	97.502	Riboflavin biosynthesis protein RibD	208	non_syn	R->Q	ko:K11752	RibD_C,dCMP_cyt_deam_1	-	-	-	-	-	-	-	-
39	AAQ_1	AAQ_1_23	AAQ	k77_229901	3719	sub_C	224	no_sweep	0	AAQ_g37936_5	in	UniRef100_C4ZC24	100	Proline--tRNA ligase	437	syn	R->R	ko:K01881	HGTP_anticodon,ProRS-C_1,tRNA-synt_2b	-	-	-	-	-	-	-	-
39	AAQ_1	AAQ_1_24	AAQ	k77_229901	11110	sub_C	224	no_sweep	0	AAQ_g37936_13	in	UniRef100_A0A174H1P0	97.2	tRNA(Ile)-lysidine synthase	392	syn	D->D	ko:K04075	ATP_bind_3,TilS,TilS_C	-	-	-	-	-	-	-	-
39	AAQ_1	AAQ_1_25	AAQ	k77_229901	11112	sub_A	224	no_sweep	0	AAQ_g37936_13	in	UniRef100_A0A174H1P0	97.2	tRNA(Ile)-lysidine synthase	394	non_syn	P->Q	ko:K04075	ATP_bind_3,TilS,TilS_C	-	-	-	-	-	-	-	-
39	AAQ_1	AAQ_1_26	AAQ	k77_229901	11136	sub_T	224	no_sweep	0	AAQ_g37936_13	in	UniRef100_A0A174H1P0	97.2	tRNA(Ile)-lysidine synthase	418	non_syn	A->V	ko:K04075	ATP_bind_3,TilS,TilS_C	-	-	-	-	-	-	-	-
39	AAQ_1	AAQ_1_27	AAQ	k77_229901	11839	sub_A	224	no_sweep	0	AAQ_g37936_13	in	UniRef100_A0A174H1P0	97.2	tRNA(Ile)-lysidine synthase	1121	syn	Ii->Ii	ko:K04075	ATP_bind_3,TilS,TilS_C	-	-	-	-	-	-	-	-
39	AAQ_1	AAQ_1_28	AAQ	k77_231363	619	sub_A	224	no_sweep	0	AAQ_g55163_2	in	UniRef100_A0A174I0A9	100	ATP synthase subunit beta	1136	syn	Ii->Ii	ko:K02112	ATP-synt_ab,ATP-synt_ab_N	-	-	-	-	-	-	-	-
39	AAQ_1	AAQ_1_29	AAQ	k77_232126	530	sub_A	224	no_sweep	0	AAQ_g66950_1	in	UniRef100_A0A0M6WSP8	100	FtsH protease regulator HflK	635	syn	D->D	-	Band_7	-	-	-	-	-	-	-	-
39	AAQ_1	AAQ_1_30	AAQ	k77_234536	19460	sub_A	224	no_sweep	0	AAQ_g98720_19	in	UniRef100_D6E522	100	Alanine--tRNA ligase	1757	non_syn	Vi->V	ko:K01872	DHHA1,tRNA-synt_2c,tRNA_SAD	-	-	-	-	-	-	-	-
39	AAQ_1	AAQ_1_31	AAQ	k77_234536	42116	sub_G	224	no_sweep	0	AAQ_g98720_36	in	UniRef100_A0A350VLS5	99.6	Magnesium chelatase	674	syn	K->K	ko:K07391	ChlI,Mg_chelatase,Mg_chelatase_C	-	-	-	-	-	-	-	-
39	AAQ_1	AAQ_1_32	AAQ	k77_234702	6531	sub_C	224	no_sweep	0	AAQ_g803_8	in	UniRef100_A0A173UJS8	100	ABC transporter ATP-binding protein	527	syn	Y->Y	ko:K02003	ABC_tran	-	-	-	-	-	-	-	-
39	AAQ_1	AAQ_1_33	AAQ	k77_234702	7001	sub_C	224	no_sweep	0	AAQ_g803_9	in	UniRef100_A0A396FI72	99	ABC transporter permease	266	syn	A->A	ko:K02004	FtsX,MacB_PCD	-	-	-	-	-	-	-	-
39	AAQ_1	AAQ_1_34	AAQ	k77_234702	7002	sub_A	224	no_sweep	0	AAQ_g803_9	in	UniRef100_A0A396FI72	99	ABC transporter permease	267	non_syn	P->T	ko:K02004	FtsX,MacB_PCD	-	-	-	-	-	-	-	-
39	AAQ_1	AAQ_1_35	AAQ	k77_234702	7003	sub_T	224	no_sweep	0	AAQ_g803_9	in	UniRef100_A0A396FI72	99	ABC transporter permease	268	non_syn	P->L	ko:K02004	FtsX,MacB_PCD	-	-	-	-	-	-	-	-
39	AAQ_1	AAQ_1_36	AAQ	k77_234702	8204	sub_C	224	no_sweep	0	AAQ_g803_9	in	UniRef100_A0A396FI72	99	ABC transporter permease	1469	syn	Y->Y	ko:K02004	FtsX,MacB_PCD	-	-	-	-	-	-	-	-
39	AAQ_1	AAQ_1_37	AAQ	k77_24699	2703	sub_C	224	no_sweep	0	AAQ_g39288_6	in	UniRef100_A0A0M6WVE2	100	Site-specific recombinase XerC	851	syn	T->T	-	Phage_int_SAM_3,Phage_integrase	-	-	-	-	-	-	-	-
39	AAQ_1	AAQ_1_38	AAQ	k77_24699	4166	sub_T	224	no_sweep	0	AAQ_g39288_7	in	UniRef100_A0A3E4E648	98.7	DNA/RNA helicase	1049	syn	D->D	-	HA	-	-	-	-	-	-	-	-
39	AAQ_1	AAQ_1_39	AAQ	k77_24699	4169	sub_C	224	no_sweep	0	AAQ_g39288_7	in	UniRef100_A0A3E4E648	98.7	DNA/RNA helicase	1052	syn	S->S	-	HA	-	-	-	-	-	-	-	-
39	AAQ_1	AAQ_1_40	AAQ	k77_24699	4172	sub_C	224	no_sweep	0	AAQ_g39288_7	in	UniRef100_A0A3E4E648	98.7	DNA/RNA helicase	1055	syn	L->L	-	HA	-	-	-	-	-	-	-	-
39	AAQ_1	AAQ_1_41	AAQ	k77_258791	10331	sub_A	224	no_sweep	0	AAQ_g32006_11	in	UniRef100_C4ZDN2	97.9	Serine-type D-Ala-D-Ala carboxypeptidase	1431	non_syn	F->Ii	ko:K01286,ko:K07258	PBP5_C,Peptidase_S11	-	-	-	-	-	-	-	-
39	AAQ_1	AAQ_1_42	AAQ	k77_260162	6898	sub_G	224	no_sweep	0	AAQ_g49440_10	in	UniRef100_A0A350WG45	99.4	ABC transporter	721	non_syn	E->G	ko:K01990	ABC_tran	-	-	-	-	-	-	-	-
39	AAQ_1	AAQ_1_43	AAQ	k77_260162	10715	sub_C	224	no_sweep	0	AAQ_g49440_13	in	UniRef100_A0A350VIC8	99.6	ATPase P	617	syn	G->G	ko:K12952	E1-E2_ATPase,Hydrolase	-	-	-	-	-	-	-	-
39	AAQ_1	AAQ_1_44	AAQ	k77_260162	10717	sub_G	224	no_sweep	0	AAQ_g49440_13	in	UniRef100_A0A350VIC8	99.6	ATPase P	619	non_syn	D->G	ko:K12952	E1-E2_ATPase,Hydrolase	-	-	-	-	-	-	-	-
39	AAQ_1	AAQ_1_45	AAQ	k77_275972	384	sub_C	224	no_sweep	0	AAQ_g70702_1	in	UniRef100_A0A350VHD2	41.304	Aspartate--tRNA ligase	359	non_syn	H->Q	ko:K01876	GAD,tRNA-synt_2,tRNA_anti-codon	-	-	-	-	-	-	-	-
39	AAQ_1	AAQ_1_46	AAQ	k77_275972	390	sub_C	224	no_sweep	0	AAQ_g70702_1	in	UniRef100_A0A350VHD2	41.304	Aspartate--tRNA ligase	353	syn	P->P	ko:K01876	GAD,tRNA-synt_2,tRNA_anti-codon	-	-	-	-	-	-	-	-
39	AAQ_1	AAQ_1_47	AAQ	k77_27621	11606	dangleRight_BACK|+	224	no_sweep	0	AAQ_g79142_6	upstream	UniRef100_R6TEL7	100	AraC-type DNA-binding domain-containing proteins	-46	undefined	undefined	-	AraC_binding,Cupin_2,HTH_18,HTH_AraC	AAQ_g79142_7	upstream	UniRef100_R6UIR1	99.8	Beta-glucosidase-related glycosidases	-240	undefined	undefined	ko:K05349	Fn3-like,Glyco_hydro_3,Glyco_hydro_3_C
39	AAQ_1	AAQ_1_48	AAQ	k77_27621	16582	sub_C	224	no_sweep	0	AAQ_g79142_8	upstream	UniRef100_A0A0M6WPS5	99	DUF4173 domain-containing protein	-93	undefined	undefined	-	DUF4173	AAQ_g79142_9	downstream	UniRef100_A0A355TKG1	100	Enolase	1507	undefined	undefined	ko:K01689	Enolase_C,Enolase_N
39	AAQ_1	AAQ_1_49	AAQ	k77_279767	1491	sub_G	224	no_sweep	0	AAQ_g15410_3	in	UniRef100_A0A0M6WJI6	98	Holliday junction resolvase RecU	9	non_syn	S->G	ko:K03700	RecU	-	-	-	-	-	-	-	-
39	AAQ_1	AAQ_1_50	AAQ	k77_285618	21821	sub_T	224	no_sweep	0	AAQ_g97243_18	in	UniRef100_C4Z8U6	99	Sodium:alanine symporter family protein	188	syn	R->R	ko:K03310	Na_Ala_symp	-	-	-	-	-	-	-	-
39	AAQ_1	AAQ_1_51	AAQ	k77_285997	5461	sub_G	224	no_sweep	0	AAQ_g752_6	in	UniRef100_A0A0M6WC57	100	DNA gyrase subunit B	794	non_syn	L->Li	ko:K02470	DNA_gyraseB,DNA_gyraseB_C,HATPase_c,Toprim	-	-	-	-	-	-	-	-
39	AAQ_1	AAQ_1_52	AAQ	k77_286956	4596	sub_A	224	no_sweep	0	AAQ_g13034_4	in	UniRef100_C4ZG87	100	Chaperone protein ClpB	2570	syn	T->T	ko:K03695,ko:K03696	AAA,AAA_2,ClpB_D2-small,Clp_N	-	-	-	-	-	-	-	-
39	AAQ_1	AAQ_1_53	AAQ	k77_289406	1673	sub_G	224	no_sweep	0	AAQ_g47845_2	in	UniRef100_A0A355TLT7	100	Magnesium transporter MgtE	1004	non_syn	V->Vi	ko:K06213	CBS,MgtE,MgtE_N	-	-	-	-	-	-	-	-
39	AAQ_1	AAQ_1_54	AAQ	k77_289406	30823	sub_A	224	no_sweep	0	AAQ_g47845_26	in	UniRef100_A0A396FQ16	99	AA_TRNA_LIGASE_II_ALA domain-containing protein	566	syn	E->E	ko:K01872	DHHA1,tRNA-synt_2c,tRNA_SAD	-	-	-	-	-	-	-	-
39	AAQ_1	AAQ_1_55	AAQ	k77_30292	8260	sub_G	224	no_sweep	0	AAQ_g19825_9	in	UniRef100_A0A0M6WT24	100	AsnC family transcriptional regulator	425	syn	D->D	-	AsnC_trans_reg,HTH_24	-	-	-	-	-	-	-	-
39	AAQ_1	AAQ_1_56	AAQ	k77_30292	12716	sub_T	224	no_sweep	0	AAQ_g19825_14	in	UniRef100_R6TFY4	96.08	Exonuclease DNA polymerase III epsilon subunit family	131	syn	A->A	ko:K03763	RNase_T	-	-	-	-	-	-	-	-
39	AAQ_1	AAQ_1_57	AAQ	k77_306021	10213	sub_T	224	no_sweep	0	AAQ_g72049_11	in	UniRef100_A0A0M6WG84	99.8	ABC transporter ATP-binding protein	659	syn	T->T	ko:K06158	ABC_tran,ABC_tran_Xtn	-	-	-	-	-	-	-	-
39	AAQ_1	AAQ_1_58	AAQ	k77_312384	2451	sub_T	224	no_sweep	0	AAQ_g61344_3	in	UniRef100_A0A396FKH1	100	LacI family transcriptional regulator	858	non_syn	V->Ii	ko:K01775,ko:K02529	LacI,Peripla_BP_3	-	-	-	-	-	-	-	-
39	AAQ_1	AAQ_1_59	AAQ	k77_318423	5781	sub_C	224	no_sweep	0	AAQ_g43996_4	in	UniRef100_A0A0M6WH81	100	Uncharacterized protein	644	syn	F->F	-	GtrA,YfhO	-	-	-	-	-	-	-	-
39	AAQ_1	AAQ_1_60	AAQ	k77_331919	5763	sub_C	224	no_sweep	0	AAQ_g26630_10	upstream	UniRef100_A0A0M6WLC2	100	HTH cro/C1-type domain-containing protein	-52	undefined	undefined	-	Cupin_2,HTH_19,HTH_3	AAQ_g26630_9	upstream	UniRef100_A0A174HGY7	100	Uncharacterized protein	-142	undefined	undefined	-	-
39	AAQ_1	AAQ_1_61	AAQ	k77_331919	5769	sub_G	224	no_sweep	0	AAQ_g26630_10	upstream	UniRef100_A0A0M6WLC2	100	HTH cro/C1-type domain-containing protein	-46	undefined	undefined	-	Cupin_2,HTH_19,HTH_3	AAQ_g26630_9	upstream	UniRef100_A0A174HGY7	100	Uncharacterized protein	-148	undefined	undefined	-	-
39	AAQ_1	AAQ_1_62	AAQ	k77_336843	5987	sub_A	224	no_sweep	0	AAQ_g92297_6	in	UniRef100_A0A3E4E7J2	99.8	Cardiolipin synthase	137	syn	A->A	ko:K06131	PLDc_2,PLDc_N	-	-	-	-	-	-	-	-
39	AAQ_1	AAQ_1_63	AAQ	k77_354364	4425	sub_C	224	no_sweep	0	AAQ_g35527_3	in	UniRef100_C4ZFS9	98.201	Thioredoxin reductase	929	syn	G->G	ko:K00384	Pyr_redox_2	-	-	-	-	-	-	-	-
39	AAQ_1	AAQ_1_64	AAQ	k77_354364	21565	sub_A	224	no_sweep	0	AAQ_g35527_21	in	UniRef100_A0A0M6WDU4	99.5	dITP/XTP pyrophosphatase	164	syn	A->A	ko:K02428	Ham1p_like	-	-	-	-	-	-	-	-
39	AAQ_1	AAQ_1_65	AAQ	k77_354364	21569	sub_G	224	no_sweep	0	AAQ_g35527_21	in	UniRef100_A0A0M6WDU4	99.5	dITP/XTP pyrophosphatase	168	non_syn	T->A	ko:K02428	Ham1p_like	-	-	-	-	-	-	-	-
39	AAQ_1	AAQ_1_66	AAQ	k77_354364	21574	sub_T	224	no_sweep	0	AAQ_g35527_21	in	UniRef100_A0A0M6WDU4	99.5	dITP/XTP pyrophosphatase	173	syn	Ii->Ii	ko:K02428	Ham1p_like	-	-	-	-	-	-	-	-
39	AAQ_1	AAQ_1_67	AAQ	k77_354629	1934	sub_G	224	no_sweep	0	AAQ_g39452_3	in	UniRef100_A0A3E4E5T8	100	Uncharacterized protein	547	non_syn	Y->C	-	LysM	-	-	-	-	-	-	-	-
39	AAQ_1	AAQ_1_68	AAQ	k77_354629	1936	sub_A	224	no_sweep	0	AAQ_g39452_3	in	UniRef100_A0A3E4E5T8	100	Uncharacterized protein	549	non_syn	G->S	-	LysM	-	-	-	-	-	-	-	-
39	AAQ_1	AAQ_1_69	AAQ	k77_354629	3910	sub_T	224	no_sweep	0	AAQ_g39452_5	in	UniRef100_A0A174M1X5	100	Colicin V production protein	329	syn	S->S	-	Colicin_V	-	-	-	-	-	-	-	-
39	AAQ_1	AAQ_1_70	AAQ	k77_409663	11943	sub_G	224	no_sweep	0	AAQ_g101528_11	in	UniRef100_A0A3E4EDW1	99.8	Glutamine-dependent NAD(+) synthetase	1272	non_syn	N->D	ko:K01950	CN_hydrolase,NAD_synthase	-	-	-	-	-	-	-	-
39	AAQ_1	AAQ_1_71	AAQ	k77_409663	23476	sub_C	224	no_sweep	0	AAQ_g101528_21	in	UniRef100_A0A396FVQ1	98.6	Peptide ABC transporter permease	1275	non_syn	Mi->Li	ko:K02004	FtsX,MacB_PCD	-	-	-	-	-	-	-	-
39	AAQ_1	AAQ_1_72	AAQ	k77_409663	55082	sub_A	224	no_sweep	0	AAQ_g101528_48	in	UniRef100_A0A0M6WKY5	99.3	Uncharacterized protein	116	syn	A->A	-	CobU	-	-	-	-	-	-	-	-
39	AAQ_1	AAQ_1_73	AAQ	k77_409663	55083	sub_T	224	no_sweep	0	AAQ_g101528_48	in	UniRef100_A0A0M6WKY5	99.3	Uncharacterized protein	115	non_syn	A->D	-	CobU	-	-	-	-	-	-	-	-
39	AAQ_1	AAQ_1_74	AAQ	k77_409663	55274	sub_C	224	no_sweep	0	AAQ_g101528_48	upstream	UniRef100_A0A0M6WKY5	99.3	Uncharacterized protein	-76	undefined	undefined	-	CobU	AAQ_g101528_49	downstream	UniRef100_C4ZB12	97.9	Adenosylcobinamide-GDP ribazoletransferase	741	undefined	undefined	ko:K02233	CobS
39	AAQ_1	AAQ_1_75	AAQ	k77_409663	55281	sub_G	224	no_sweep	0	AAQ_g101528_48	upstream	UniRef100_A0A0M6WKY5	99.3	Uncharacterized protein	-83	undefined	undefined	-	CobU	AAQ_g101528_49	downstream	UniRef100_C4ZB12	97.9	Adenosylcobinamide-GDP ribazoletransferase	734	undefined	undefined	ko:K02233	CobS
39	AAQ_1	AAQ_1_76	AAQ	k77_413096	15673	sub_T	224	no_sweep	0	AAQ_g35948_13	in	UniRef100_A0A413BAL1	93.181	DMT family transporter	824	non_syn	Li->L	-	EamA	-	-	-	-	-	-	-	-
39	AAQ_1	AAQ_1_77	AAQ	k77_413096	15685	sub_T	224	no_sweep	0	AAQ_g35948_13	in	UniRef100_A0A413BAL1	93.181	DMT family transporter	812	syn	G->G	-	EamA	-	-	-	-	-	-	-	-
39	AAQ_1	AAQ_1_78	AAQ	k77_413096	15694	sub_G	224	no_sweep	0	AAQ_g35948_13	in	UniRef100_A0A413BAL1	93.181	DMT family transporter	803	syn	A->A	-	EamA	-	-	-	-	-	-	-	-
39	AAQ_1	AAQ_1_79	AAQ	k77_413096	17617	sub_T	224	no_sweep	0	AAQ_g35948_14	upstream	UniRef100_A0A0M6WFL9	99.7	Transcriptional regulator (LacI family)	-61	undefined	undefined	ko:K02529,ko:K03604	LacI,Peripla_BP_3	AAQ_g35948_15	upstream	UniRef100_UPI0012B0BE84	99.3	glycosyl transferase	-318	undefined	undefined	ko:K00702	Glyco_hydro_36,Glyco_transf_36
39	AAQ_1	AAQ_1_80	AAQ	k77_413096	21203	sub_C	224	no_sweep	0	AAQ_g35948_17	in	UniRef100_A0A0M6WEI4	94.9	Uncharacterized protein	253	non_syn	T->S	ko:K06404	SpoVAB	-	-	-	-	-	-	-	-
39	AAQ_1	AAQ_1_81	AAQ	k77_413096	21209	ins_GGT	224	no_sweep	0	AAQ_g35948_17	in	UniRef100_A0A0M6WEI4	94.9	Uncharacterized protein	247	unknown	unknown	ko:K06404	SpoVAB	-	-	-	-	-	-	-	-
39	AAQ_1	AAQ_1_82	AAQ	k77_413096	21210	sub_C	224	no_sweep	0	AAQ_g35948_17	in	UniRef100_A0A0M6WEI4	94.9	Uncharacterized protein	246	non_syn	F->V	ko:K06404	SpoVAB	-	-	-	-	-	-	-	-
39	AAQ_1	AAQ_1_83	AAQ	k77_416041	9465	sub_T	224	no_sweep	0	AAQ_g75939_11	in	UniRef100_A0A2U2EGV0	96.9	DUF2975 domain-containing protein	71	syn	V->V	-	DUF2975	-	-	-	-	-	-	-	-
39	AAQ_1	AAQ_1_84	AAQ	k77_42106	5759	sub_C	224	no_sweep	0	AAQ_g80898_6	in	UniRef100_A0A0M6WSV5	100	Uncharacterized protein	530	syn	T->T	-	HTH_3	-	-	-	-	-	-	-	-
39	AAQ_1	AAQ_1_85	AAQ	k77_42106	5762	sub_C	224	no_sweep	0	AAQ_g80898_6	in	UniRef100_A0A0M6WSV5	100	Uncharacterized protein	527	syn	E->E	-	HTH_3	-	-	-	-	-	-	-	-
39	AAQ_1	AAQ_1_86	AAQ	k77_42106	6038	sub_T	224	no_sweep	0	AAQ_g80898_6	in	UniRef100_A0A0M6WSV5	100	Uncharacterized protein	251	syn	T->T	-	HTH_3	-	-	-	-	-	-	-	-
39	AAQ_1	AAQ_1_87	AAQ	k77_42106	6070	sub_T	224	no_sweep	0	AAQ_g80898_6	in	UniRef100_A0A0M6WSV5	100	Uncharacterized protein	219	non_syn	D->N	-	HTH_3	-	-	-	-	-	-	-	-
39	AAQ_1	AAQ_1_88	AAQ	k77_454136	9905	sub_A	224	no_sweep	0	AAQ_g98816_9	in	UniRef100_A0A173YYE3	100	Signal recognition particle protein	815	syn	L->L	ko:K03106	SRP54,SRP54_N,SRP_SPB	-	-	-	-	-	-	-	-
39	AAQ_1	AAQ_1_89	AAQ	k77_454136	9911	sub_A	224	no_sweep	0	AAQ_g98816_9	in	UniRef100_A0A173YYE3	100	Signal recognition particle protein	821	syn	A->A	ko:K03106	SRP54,SRP54_N,SRP_SPB	-	-	-	-	-	-	-	-
39	AAQ_1	AAQ_1_90	AAQ	k77_455070	13167	sub_T	224	no_sweep	0	AAQ_g7694_14	downstream	UniRef100_A0A174MPZ2	99.5	Cadmium, zinc and cobalt-transporting ATPase	1885	undefined	undefined	ko:K01534	E1-E2_ATPase,HMA,Hydrolase	AAQ_g7694_15	upstream	UniRef100_A0A0M6WRS6	81.879	Putative transcriptional regulator	-154	undefined	undefined	ko:K21903	HTH_5
39	AAQ_1	AAQ_1_91	AAQ	k77_455070	13168	sub_G	224	no_sweep	0	AAQ_g7694_14	downstream	UniRef100_A0A174MPZ2	99.5	Cadmium, zinc and cobalt-transporting ATPase	1886	undefined	undefined	ko:K01534	E1-E2_ATPase,HMA,Hydrolase	AAQ_g7694_15	upstream	UniRef100_A0A0M6WRS6	81.879	Putative transcriptional regulator	-153	undefined	undefined	ko:K21903	HTH_5
39	AAQ_1	AAQ_1_92	AAQ	k77_455070	13169	sub_C	224	no_sweep	0	AAQ_g7694_14	downstream	UniRef100_A0A174MPZ2	99.5	Cadmium, zinc and cobalt-transporting ATPase	1887	undefined	undefined	ko:K01534	E1-E2_ATPase,HMA,Hydrolase	AAQ_g7694_15	upstream	UniRef100_A0A0M6WRS6	81.879	Putative transcriptional regulator	-152	undefined	undefined	ko:K21903	HTH_5
39	AAQ_1	AAQ_1_93	AAQ	k77_455070	13170	sub_A	224	no_sweep	0	AAQ_g7694_14	downstream	UniRef100_A0A174MPZ2	99.5	Cadmium, zinc and cobalt-transporting ATPase	1888	undefined	undefined	ko:K01534	E1-E2_ATPase,HMA,Hydrolase	AAQ_g7694_15	upstream	UniRef100_A0A0M6WRS6	81.879	Putative transcriptional regulator	-151	undefined	undefined	ko:K21903	HTH_5
39	AAQ_1	AAQ_1_94	AAQ	k77_455070	13184	sub_G	224	no_sweep	0	AAQ_g7694_14	downstream	UniRef100_A0A174MPZ2	99.5	Cadmium, zinc and cobalt-transporting ATPase	1902	undefined	undefined	ko:K01534	E1-E2_ATPase,HMA,Hydrolase	AAQ_g7694_15	upstream	UniRef100_A0A0M6WRS6	81.879	Putative transcriptional regulator	-137	undefined	undefined	ko:K21903	HTH_5
39	AAQ_1	AAQ_1_95	AAQ	k77_455070	16378	sub_T	224	no_sweep	0	AAQ_g7694_18	in	UniRef100_A0A174MS80	100	Glycogen debranching enzyme	434	syn	G->G	ko:K01214	Alpha-amylase,CBM_48	-	-	-	-	-	-	-	-
39	AAQ_1	AAQ_1_96	AAQ	k77_456917	13884	sub_A	224	no_sweep	0	AAQ_g34392_13	in	UniRef100_A0A3E4EGQ4	99.6	Sugar:sodium symporter	1145	syn	A->A	ko:K03292,ko:K11104,ko:K16209	MFS_2	-	-	-	-	-	-	-	-
39	AAQ_1	AAQ_1_97	AAQ	k77_456917	32826	sub_G	224	no_sweep	0	AAQ_g34392_26	in	UniRef100_A0A0M6WHA4	98.4	Putative integral membrane protein	2163	non_syn	T->A	ko:K02238	Competence,DUF4131,Lactamase_B	-	-	-	-	-	-	-	-
39	AAQ_1	AAQ_1_98	AAQ	k77_48150	4257	sub_A	224	no_sweep	0	AAQ_g54283_4	in	UniRef100_A0A414HXT5	100	Ion-translocating oxidoreductase complex subunit D	494	syn	G->G	ko:K03614	NQR2_RnfD_RnfE	-	-	-	-	-	-	-	-
39	AAQ_1	AAQ_1_99	AAQ	k77_48150	4905	sub_C	224	no_sweep	0	AAQ_g54283_5	in	UniRef100_A0A3E4EH46	99	Ion-translocating oxidoreductase complex subunit G	187	non_syn	V->A	ko:K03612	FMN_bind	-	-	-	-	-	-	-	-
39	AAQ_1	AAQ_1_100	AAQ	k77_54192	1366	sub_A	224	no_sweep	0	AAQ_g39879_1	upstream	UniRef100_A0A413U6N9	98.8	Gfo/Idh/MocA family oxidoreductase	-64	undefined	undefined	-	GFO_IDH_MocA,GFO_IDH_MocA_C	AAQ_g39879_2	upstream	UniRef100_A0A2U2EFH0	100	DeoR family transcriptional regulator	-518	undefined	undefined	ko:K03436	DeoRC,HTH_DeoR
39	AAQ_1	AAQ_1_101	AAQ	k77_57716	512	sub_C	224	no_sweep	0	AAQ_g83864_1	in	UniRef100_A0A5S4VEZ9	99.6	Response regulator	137	syn	D->D	ko:K07720	HTH_18,HTH_AraC,Response_reg	-	-	-	-	-	-	-	-
39	AAQ_1	AAQ_1_102	AAQ	k77_69490	13127	sub_A	224	no_sweep	0	AAQ_g49983_15	in	UniRef100_A0A174KQT5	99.6	Flp pilus assembly protein TadB	54	non_syn	Vi->Mi	ko:K12510	T2SSF	-	-	-	-	-	-	-	-
39	AAQ_1	AAQ_1_103	AAQ	k77_76714	26213	sub_T	224	no_sweep	0	AAQ_g51503_33	in	UniRef100_A0A350VIB5	100	C4-dicarboxylate ABC transporter permease	95	syn	G->G	-	DctM,DctQ	-	-	-	-	-	-	-	-
39	AAQ_1	AAQ_1_104	AAQ	k77_105058	18131	sub_G	224	no_sweep	0	AAQ_g37323_15	in	UniRef100_UPI001106E4BA	99.5	MMPL family transporter	1910	syn	Ii->Ii	ko:K03296	ACR_tran	-	-	-	-	-	-	-	-
39	AAQ_1	AAQ_1_105	AAQ	k77_105058	18224	sub_T	224	no_sweep	0	AAQ_g37323_15	in	UniRef100_UPI001106E4BA	99.5	MMPL family transporter	1817	syn	A->A	ko:K03296	ACR_tran	-	-	-	-	-	-	-	-
39	AAQ_1	AAQ_1_106	AAQ	k77_105058	27591	sub_C	224	no_sweep	0	AAQ_g37323_22	in	UniRef100_A0A413U013	98.7	PDZ domain-containing protein	15	non_syn	R->G	ko:K04771	PDZ_2,Trypsin_2	-	-	-	-	-	-	-	-
39	AAQ_1	AAQ_1_107	AAQ	k77_106111	23556	sub_G	224	no_sweep	0	AAQ_g50896_19	in	UniRef100_A0A348S6K7	100	ABC transporter	704	syn	E->E	ko:K02005	Biotin_lipoyl_2,HlyD_3,HlyD_D23	-	-	-	-	-	-	-	-
39	AAQ_1	AAQ_1_108	AAQ	k77_106111	33212	sub_T	224	no_sweep	0	AAQ_g50896_27	in	UniRef100_A0A0M6WMU1	99.3	M18 family aminopeptidase	779	syn	F->F	ko:K01267	Peptidase_M18	-	-	-	-	-	-	-	-
39	AAQ_1	AAQ_1_109	AAQ	k77_106111	33230	sub_A	224	no_sweep	0	AAQ_g50896_27	in	UniRef100_A0A0M6WMU1	99.3	M18 family aminopeptidase	797	syn	G->G	ko:K01267	Peptidase_M18	-	-	-	-	-	-	-	-
39	AAQ_1	AAQ_1_110	AAQ	k77_106606	6276	sub_T	224	no_sweep	0	AAQ_g56470_7	in	UniRef100_A0A174IST0	98.7	Bifunctional oligoribonuclease and PAP phosphatase nrnA	398	syn	F->F	ko:K06881	DHH,DHHA1	-	-	-	-	-	-	-	-
39	AAQ_1	AAQ_1_111	AAQ	k77_106606	6279	sub_A	224	no_sweep	0	AAQ_g56470_7	in	UniRef100_A0A174IST0	98.7	Bifunctional oligoribonuclease and PAP phosphatase nrnA	401	syn	E->E	ko:K06881	DHH,DHHA1	-	-	-	-	-	-	-	-
39	AAQ_1	AAQ_1_112	AAQ	k77_107803	5760	sub_G	224	no_sweep	0	AAQ_g72150_7	in	UniRef100_A0A174HBZ8	100	Uncharacterized protein	21	non_syn	K->E	-	-	-	-	-	-	-	-	-	-
39	AAQ_1	AAQ_1_113	AAQ	k77_123546	12338	sub_G	224	no_sweep	0	AAQ_g88449_13	in	UniRef100_A0A0M6W9V3	100	5-dehydro-2-deoxygluconokinase	411	non_syn	K->Q	ko:K00847	PfkB	-	-	-	-	-	-	-	-
39	AAQ_1	AAQ_1_114	AAQ	k77_127878	26602	sub_G	224	no_sweep	0	AAQ_g50039_21	in	UniRef100_C4ZD53	98.63	Uncharacterized protein	233	syn	G->G	-	-	-	-	-	-	-	-	-	-
39	AAQ_1	AAQ_1_115	AAQ	k77_127878	26617	sub_G	224	no_sweep	0	AAQ_g50039_21	in	UniRef100_C4ZD53	98.63	Uncharacterized protein	218	syn	A->A	-	-	-	-	-	-	-	-	-	-
39	AAQ_1	AAQ_1_116	AAQ	k77_127878	26626	sub_C	224	no_sweep	0	AAQ_g50039_21	in	UniRef100_C4ZD53	98.63	Uncharacterized protein	209	syn	G->G	-	-	-	-	-	-	-	-	-	-
39	AAQ_1	AAQ_1_117	AAQ	k77_127878	26648	sub_G	224	no_sweep	0	AAQ_g50039_21	in	UniRef100_C4ZD53	98.63	Uncharacterized protein	187	non_syn	D->A	-	-	-	-	-	-	-	-	-	-
39	AAQ_1	AAQ_1_118	AAQ	k77_135313	13723	sub_A	224	no_sweep	0	AAQ_g47201_10	in	UniRef100_A0A174LPA0	99.6	M18 family aminopeptidase	560	syn	A->A	-	Peptidase_M18	-	-	-	-	-	-	-	-
39	AAQ_1	AAQ_1_119	AAQ	k77_135313	26750	sub_T	224	no_sweep	0	AAQ_g47201_22	in	UniRef100_A0A0M6WCX4	98.8	4-alpha-glucanotransferase	693	non_syn	G->C	-	GDE_C,GDE_N	-	-	-	-	-	-	-	-
39	AAQ_1	AAQ_1_120	AAQ	k77_135313	26751	sub_C	224	no_sweep	0	AAQ_g47201_22	in	UniRef100_A0A0M6WCX4	98.8	4-alpha-glucanotransferase	694	non_syn	G->A	-	GDE_C,GDE_N	-	-	-	-	-	-	-	-
39	AAQ_1	AAQ_1_121	AAQ	k77_135313	26755	sub_T	224	no_sweep	0	AAQ_g47201_22	in	UniRef100_A0A0M6WCX4	98.8	4-alpha-glucanotransferase	698	syn	A->A	-	GDE_C,GDE_N	-	-	-	-	-	-	-	-
39	AAQ_1	AAQ_1_122	AAQ	k77_135313	26800	sub_T	224	no_sweep	0	AAQ_g47201_22	in	UniRef100_A0A0M6WCX4	98.8	4-alpha-glucanotransferase	743	syn	A->A	-	GDE_C,GDE_N	-	-	-	-	-	-	-	-
39	AAQ_1	AAQ_1_123	AAQ	k77_135313	26806	sub_C	224	no_sweep	0	AAQ_g47201_22	in	UniRef100_A0A0M6WCX4	98.8	4-alpha-glucanotransferase	749	syn	N->N	-	GDE_C,GDE_N	-	-	-	-	-	-	-	-
39	AAQ_1	AAQ_1_124	AAQ	k77_135313	26808	sub_G	224	no_sweep	0	AAQ_g47201_22	in	UniRef100_A0A0M6WCX4	98.8	4-alpha-glucanotransferase	751	non_syn	D->G	-	GDE_C,GDE_N	-	-	-	-	-	-	-	-
39	AAQ_1	AAQ_1_125	AAQ	k77_135313	26813	sub_G	224	no_sweep	0	AAQ_g47201_22	in	UniRef100_A0A0M6WCX4	98.8	4-alpha-glucanotransferase	756	non_syn	S->A	-	GDE_C,GDE_N	-	-	-	-	-	-	-	-
39	AAQ_1	AAQ_1_126	AAQ	k77_135313	26818	sub_T	224	no_sweep	0	AAQ_g47201_22	in	UniRef100_A0A0M6WCX4	98.8	4-alpha-glucanotransferase	761	syn	G->G	-	GDE_C,GDE_N	-	-	-	-	-	-	-	-
39	AAQ_1	AAQ_1_127	AAQ	k77_135313	26819	sub_T	224	no_sweep	0	AAQ_g47201_22	in	UniRef100_A0A0M6WCX4	98.8	4-alpha-glucanotransferase	762	non_syn	T->S	-	GDE_C,GDE_N	-	-	-	-	-	-	-	-
39	AAQ_1	AAQ_1_128	AAQ	k77_136398	6674	sub_T	224	no_sweep	0	AAQ_g60420_5	in	UniRef100_A0A413BEC7	99.4	Sensor histidine kinase	587	non_syn	Mi->Ii	-	HAMP,HATPase_c,HisKA	-	-	-	-	-	-	-	-
39	AAQ_1	AAQ_1_129	AAQ	k77_142203	16722	sub_G	224	no_sweep	0	AAQ_g41608_18	in	UniRef100_A0A348SB90	99.8	3-phosphoshikimate 1-carboxyvinyltransferase	1274	syn	S->S	ko:K00800	EPSP_synthase	-	-	-	-	-	-	-	-
39	AAQ_1	AAQ_1_130	AAQ	k77_142203	17310	sub_T	224	no_sweep	0	AAQ_g41608_18	in	UniRef100_A0A348SB90	99.8	3-phosphoshikimate 1-carboxyvinyltransferase	686	syn	A->A	ko:K00800	EPSP_synthase	-	-	-	-	-	-	-	-
39	AAQ_1	AAQ_1_131	AAQ	k77_152368	1471	sub_A	224	no_sweep	0	AAQ_g90440_1	in	UniRef100_UPI0012AFFDB4	86.49	heavy metal translocating P-type ATPase	1469	syn	A->A	ko:K01533,ko:K17686	E1-E2_ATPase,HMA,Hydrolase	-	-	-	-	-	-	-	-
39	AAQ_1	AAQ_1_132	AAQ	k77_157396	9948	sub_C	224	no_sweep	0	AAQ_g51215_10	in	UniRef100_A0A173USD7	100	ATPase	1091	non_syn	V->Vi	-	FGGY_C,FGGY_N	-	-	-	-	-	-	-	-
39	AAQ_1	AAQ_1_133	AAQ	k77_160692	2579	sub_C	224	no_sweep	0	AAQ_g93861_3	in	UniRef100_A0A173TEZ4	100	PD-(D/E)XK nuclease family transposase	141	syn	L->L	-	PDDEXK_2	-	-	-	-	-	-	-	-
39	AAQ_1	AAQ_1_134	AAQ	k77_160692	7158	sub_G	224	no_sweep	0	AAQ_g93861_8	in	UniRef100_A0A173TF77	99.588	Plipastatin synthase subunit A	1184	non_syn	L->Li	-	Condensation	-	-	-	-	-	-	-	-
39	AAQ_1	AAQ_1_135	AAQ	k77_167404	3424	sub_T	224	no_sweep	0	AAQ_g83178_5	in	UniRef100_A0A396FGV6	99	FHA domain-containing protein	944	syn	S->S	-	FHA	-	-	-	-	-	-	-	-
39	AAQ_1	AAQ_1_136	AAQ	k77_170758	10263	sub_G	224	no_sweep	0	AAQ_g30780_5	in	UniRef100_A0A413U6L6	98.7	Uncharacterized protein	2117	non_syn	V->Vi	-	-	-	-	-	-	-	-	-	-
39	AAQ_1	AAQ_1_137	AAQ	k77_177141	4739	sub_G	224	no_sweep	0	AAQ_g14991_5	in	UniRef100_A0A0M6WIW0	100	23S rRNA (Guanosine(2251)-2'-O)-methyltransferase RlmB	623	syn	D->D	ko:K03218	SpoU_methylase,SpoU_sub_bind	-	-	-	-	-	-	-	-
39	AAQ_1	AAQ_1_138	AAQ	k77_177141	8618	sub_C	224	no_sweep	0	AAQ_g14991_9	in	UniRef100_A0A0M6WGA5	100	Phosphate acetyltransferase	410	non_syn	L->Li	ko:K00625	PTA_PTB	-	-	-	-	-	-	-	-
39	AAQ_1	AAQ_1_139	AAQ	k77_19784	10006	sub_T	224	no_sweep	0	AAQ_g77444_10	downstream	UniRef100_A0A173U9C8	100	Alpha-1,4 glucan phosphorylase	2647	undefined	undefined	ko:K00688	Phosphorylase	AAQ_g77444_11	upstream	UniRef100_A0A173U7K6	75.471	Photosystem I assembly protein Ycf3	-286	undefined	undefined	-	TPR_16,TPR_19,TPR_2,TPR_6,TPR_7,TPR_8
39	AAQ_1	AAQ_1_140	AAQ	k77_19784	10644	sub_C	224	no_sweep	0	AAQ_g77444_11	in	UniRef100_A0A173U7K6	75.471	Photosystem I assembly protein Ycf3	352	non_syn	Vi->A	-	TPR_16,TPR_19,TPR_2,TPR_6,TPR_7,TPR_8	-	-	-	-	-	-	-	-
39	AAQ_1	AAQ_1_141	AAQ	k77_19784	10645	sub_A	224	no_sweep	0	AAQ_g77444_11	in	UniRef100_A0A173U7K6	75.471	Photosystem I assembly protein Ycf3	353	non_syn	Vi->V	-	TPR_16,TPR_19,TPR_2,TPR_6,TPR_7,TPR_8	-	-	-	-	-	-	-	-
39	AAQ_1	AAQ_1_142	AAQ	k77_19784	10651	sub_G	224	no_sweep	0	AAQ_g77444_11	in	UniRef100_A0A173U7K6	75.471	Photosystem I assembly protein Ycf3	359	syn	T->T	-	TPR_16,TPR_19,TPR_2,TPR_6,TPR_7,TPR_8	-	-	-	-	-	-	-	-
39	AAQ_1	AAQ_1_143	AAQ	k77_200153	32266	sub_C	224	no_sweep	0	AAQ_g30661_29	in	UniRef100_R6TNJ9	99.7	Uncharacterized protein	440	syn	S->S	-	DUF1732,YicC_N	-	-	-	-	-	-	-	-
39	AAQ_1	AAQ_1_144	AAQ	k77_202796	630	sub_C	224	no_sweep	0	AAQ_g68479_2	in	UniRef100_A0A0M6WGR2	100	Ribosome maturation factor RimM	389	syn	Y->Y	ko:K02860	PRC,RimM	-	-	-	-	-	-	-	-
39	AAQ_1	AAQ_1_145	AAQ	k77_210323	25264	sub_G	224	no_sweep	0	AAQ_g71830_21	in	UniRef100_R6TFW7	99.6	Arabinogalactan endo-beta-1,4-galactanase	1840	non_syn	H->R	-	GGDEF,Peripla_BP_3	-	-	-	-	-	-	-	-
39	AAQ_1	AAQ_1_146	AAQ	k77_212768	4864	dangleLeft_k77_212768|+	224	no_sweep	0	AAQ_g1921_5	in	UniRef100_A0A413U8S1	93.5	RNase H	204	unknown	unknown	ko:K03469,ko:K06993	Cauli_VI,RNase_H	-	-	-	-	-	-	-	-
39	AAQ_1	AAQ_1_147	AAQ	k77_212768	4996	sub_C	224	no_sweep	0	AAQ_g1921_5	in	UniRef100_A0A413U8S1	93.5	RNase H	72	non_syn	T->A	ko:K03469,ko:K06993	Cauli_VI,RNase_H	-	-	-	-	-	-	-	-
39	AAQ_1	AAQ_1_148	AAQ	k77_221870	4832	sub_A	224	no_sweep	0	AAQ_g28374_5	in	UniRef100_A0A3E4E9W5	99	DnaD domain protein	734	syn	R->R	-	DnaB_2	-	-	-	-	-	-	-	-
39	AAQ_1	AAQ_1_149	AAQ	k77_221870	4901	sub_A	224	no_sweep	0	AAQ_g28374_5	in	UniRef100_A0A3E4E9W5	99	DnaD domain protein	665	syn	L->L	-	DnaB_2	-	-	-	-	-	-	-	-
39	AAQ_1	AAQ_1_150	AAQ	k77_221870	18826	sub_G	224	no_sweep	0	AAQ_g28374_15	in	UniRef100_A0A174HA03	100	UDP-N-acetylglucosamine 1-carboxyvinyltransferase	1151	non_syn	D->E	ko:K00790	EPSP_synthase	-	-	-	-	-	-	-	-
39	AAQ_1	AAQ_1_151	AAQ	k77_221870	18832	sub_C	224	no_sweep	0	AAQ_g28374_15	in	UniRef100_A0A174HA03	100	UDP-N-acetylglucosamine 1-carboxyvinyltransferase	1157	syn	Ii->Ii	ko:K00790	EPSP_synthase	-	-	-	-	-	-	-	-
39	AAQ_1	AAQ_1_152	AAQ	k77_234536	44151	sub_T	224	no_sweep	0	AAQ_g98720_38	in	UniRef100_UPI00110671CB	99.9	type I DNA topoisomerase	98	syn	H->H	ko:K03168	Topoisom_bac,Toprim,zf-C4_Topoisom	-	-	-	-	-	-	-	-
39	AAQ_1	AAQ_1_153	AAQ	k77_234536	44157	sub_G	224	no_sweep	0	AAQ_g98720_38	in	UniRef100_UPI00110671CB	99.9	type I DNA topoisomerase	104	syn	R->R	ko:K03168	Topoisom_bac,Toprim,zf-C4_Topoisom	-	-	-	-	-	-	-	-
39	AAQ_1	AAQ_1_154	AAQ	k77_234702	5644	sub_C	224	no_sweep	0	AAQ_g803_7	in	UniRef100_UPI001106E49B	99	asparagine synthase (glutamine-hydrolyzing)	80	syn	K->K	ko:K01953	Asn_synthase,GATase_7	-	-	-	-	-	-	-	-
39	AAQ_1	AAQ_1_155	AAQ	k77_234702	5668	sub_A	224	no_sweep	0	AAQ_g803_7	in	UniRef100_UPI001106E49B	99	asparagine synthase (glutamine-hydrolyzing)	56	syn	D->D	ko:K01953	Asn_synthase,GATase_7	-	-	-	-	-	-	-	-
39	AAQ_1	AAQ_1_156	AAQ	k77_234702	5671	sub_G	224	no_sweep	0	AAQ_g803_7	in	UniRef100_UPI001106E49B	99	asparagine synthase (glutamine-hydrolyzing)	53	syn	T->T	ko:K01953	Asn_synthase,GATase_7	-	-	-	-	-	-	-	-
39	AAQ_1	AAQ_1_157	AAQ	k77_234702	5677	sub_C	224	no_sweep	0	AAQ_g803_7	in	UniRef100_UPI001106E49B	99	asparagine synthase (glutamine-hydrolyzing)	47	syn	E->E	ko:K01953	Asn_synthase,GATase_7	-	-	-	-	-	-	-	-
39	AAQ_1	AAQ_1_158	AAQ	k77_234702	5688	sub_C	224	no_sweep	0	AAQ_g803_7	in	UniRef100_UPI001106E49B	99	asparagine synthase (glutamine-hydrolyzing)	36	non_syn	N->D	ko:K01953	Asn_synthase,GATase_7	-	-	-	-	-	-	-	-
39	AAQ_1	AAQ_1_159	AAQ	k77_234702	5689	sub_T	224	no_sweep	0	AAQ_g803_7	in	UniRef100_UPI001106E49B	99	asparagine synthase (glutamine-hydrolyzing)	35	syn	E->E	ko:K01953	Asn_synthase,GATase_7	-	-	-	-	-	-	-	-
39	AAQ_1	AAQ_1_160	AAQ	k77_255187	31173	sub_T	224	no_sweep	0	AAQ_g92489_30	in	UniRef100_D4JGH9	99.6	Uncharacterized FAD-dependent dehydrogenases	323	syn	G->G	ko:K07137	HI0933_like,NAD_binding_8,Pyr_redox_2	-	-	-	-	-	-	-	-
39	AAQ_1	AAQ_1_161	AAQ	k77_255187	31194	sub_T	224	no_sweep	0	AAQ_g92489_30	in	UniRef100_D4JGH9	99.6	Uncharacterized FAD-dependent dehydrogenases	302	syn	R->R	ko:K07137	HI0933_like,NAD_binding_8,Pyr_redox_2	-	-	-	-	-	-	-	-
39	AAQ_1	AAQ_1_162	AAQ	k77_258791	2930	sub_T	224	no_sweep	0	AAQ_g32006_4	in	UniRef100_A0A2U2EJP9	91.111	dTTP/UTP pyrophosphatase	557	syn	Y->Y	ko:K06287	Maf	-	-	-	-	-	-	-	-
39	AAQ_1	AAQ_1_163	AAQ	k77_258791	14257	sub_T	224	no_sweep	0	AAQ_g32006_15	in	UniRef100_A0A0M6WU42	100	DNA polymerase III subunit delta	704	syn	G->G	ko:K02341	DNA_pol3_delta2,DNApol3-delta_C	-	-	-	-	-	-	-	-
39	AAQ_1	AAQ_1_164	AAQ	k77_258791	17478	sub_T	224	no_sweep	0	AAQ_g32006_19	in	UniRef100_UPI0012AFB8C7	99.1	Trk family potassium uptake protein	35	syn	H->H	ko:K03498	TrkH	-	-	-	-	-	-	-	-
39	AAQ_1	AAQ_1_165	AAQ	k77_265554	341	sub_C	224	no_sweep	0	AAQ_g29749_1	in	UniRef100_A0A415I0J5	88.854	Cell wall protein (Fragment)	338	syn	L->L	-	-	-	-	-	-	-	-	-	-
39	AAQ_1	AAQ_1_166	AAQ	k77_265554	16071	sub_G	224	no_sweep	0	AAQ_g29749_17	in	UniRef100_A0A174H7A4	97.1	DNA methylase	3314	syn	A->A	-	DUF3849,Helicase_C,ResIII,SNF2_N	-	-	-	-	-	-	-	-
39	AAQ_1	AAQ_1_167	AAQ	k77_265554	32033	sub_C	224	no_sweep	0	AAQ_g29749_28	in	UniRef100_A0A413Q9S7	95.9	Hydroxyethylthiazole kinase	888	syn	R->R	ko:K00878	HK	-	-	-	-	-	-	-	-
39	AAQ_1	AAQ_1_168	AAQ	k77_265554	41266	sub_T	224	no_sweep	0	AAQ_g29749_38	in	UniRef100_A0A174F7E8	99.7	Orotidine 5'-phosphate decarboxylase	722	syn	G->G	ko:K01591	OMPdecase	-	-	-	-	-	-	-	-
39	AAQ_1	AAQ_1_169	AAQ	k77_265554	42263	sub_C	224	no_sweep	0	AAQ_g29749_39	in	UniRef100_UPI001106C7C8	100	dihydroorotate dehydrogenase electron transfer subunit	734	syn	A->A	ko:K02823	DHODB_Fe-S_bind,FAD_binding_6,NAD_binding_1	-	-	-	-	-	-	-	-
39	AAQ_1	AAQ_1_170	AAQ	k77_279767	1272	sub_T	224	no_sweep	0	AAQ_g15410_2	in	UniRef100_A0A395ZJH6	98.8	RluA family pseudouridine synthase	743	syn	L->L	ko:K06179	PseudoU_synth_2,S4	-	-	-	-	-	-	-	-
39	AAQ_1	AAQ_1_171	AAQ	k77_285618	3775	sub_C	224	no_sweep	0	AAQ_g97243_2	downstream	UniRef100_A0A5S4VRU1	100	HAD family phosphatase	878	undefined	undefined	-	Hydrolase_3	AAQ_g97243_3	upstream	UniRef100_UPI0012B06950	100	oligosaccharide flippase family protein	-89	undefined	undefined	ko:K06409	Polysacc_synt,Polysacc_synt_C
39	AAQ_1	AAQ_1_172	AAQ	k77_286956	19151	sub_T	224	no_sweep	0	AAQ_g13034_18	in	UniRef100_A0A413TYC5	99.8	DUF342 domain-containing protein	123	non_syn	A->T	ko:K09749	FapA,Jag_N	-	-	-	-	-	-	-	-
39	AAQ_1	AAQ_1_173	AAQ	k77_286956	19432	sub_A	224	no_sweep	0	AAQ_g13034_18	upstream	UniRef100_A0A413TYC5	99.8	DUF342 domain-containing protein	-158	undefined	undefined	ko:K09749	FapA,Jag_N	AAQ_g13034_19	downstream	UniRef100_A0A396FNS0	99.6	Acetyl xylan esterase	1592	undefined	undefined	-	CBM_4_9,CBM_6,Esterase,Glyco_hydro_43
39	AAQ_1	AAQ_1_174	AAQ	k77_286956	19484	sub_A	224	no_sweep	0	AAQ_g13034_18	upstream	UniRef100_A0A413TYC5	99.8	DUF342 domain-containing protein	-210	undefined	undefined	ko:K09749	FapA,Jag_N	AAQ_g13034_19	downstream	UniRef100_A0A396FNS0	99.6	Acetyl xylan esterase	1540	undefined	undefined	-	CBM_4_9,CBM_6,Esterase,Glyco_hydro_43
39	AAQ_1	AAQ_1_175	AAQ	k77_293714	10208	sub_A	224	no_sweep	0	AAQ_g5172_8	in	UniRef100_UPI0011064C34	100	DUF3794 domain-containing protein	1109	syn	A->A	-	DUF3794,LysM	-	-	-	-	-	-	-	-
39	AAQ_1	AAQ_1_176	AAQ	k77_293871	6132	sub_T	224	no_sweep	0	AAQ_g7726_5	in	UniRef100_A0A174J8J6	99.8	Trk system potassium transporter TrkA	740	syn	G->G	ko:K03499	TrkA_C,TrkA_N	-	-	-	-	-	-	-	-
39	AAQ_1	AAQ_1_177	AAQ	k77_293871	30366	sub_A	224	no_sweep	0	AAQ_g7726_26	in	UniRef100_A0A415IB08	96.8	Murein L,D-transpeptidase	1517	syn	G->G	-	PG_binding_4,YkuD	-	-	-	-	-	-	-	-
39	AAQ_1	AAQ_1_178	AAQ	k77_293871	32632	sub_A	224	no_sweep	0	AAQ_g7726_28	in	UniRef100_A0A174J2H4	99.2	CpsD/CapB family tyrosine-protein kinase	694	non_syn	S->N	-	AAA_31,CbiA	-	-	-	-	-	-	-	-
39	AAQ_1	AAQ_1_179	AAQ	k77_293871	35857	sub_T	224	no_sweep	0	AAQ_g7726_31	in	UniRef100_UPI0011058040	95.8	DUF1015 domain-containing protein	746	syn	V->V	-	DUF1015	-	-	-	-	-	-	-	-
39	AAQ_1	AAQ_1_180	AAQ	k77_318423	11286	sub_T	224	no_sweep	0	AAQ_g43996_8	in	UniRef100_UPI0012AEFE1A	100	M24 family metallopeptidase	431	syn	L->L	ko:K01262	Creatinase_N,Creatinase_N_2,Peptidase_M24,Peptidase_M24_C	-	-	-	-	-	-	-	-
39	AAQ_1	AAQ_1_181	AAQ	k77_337197	201	sub_C	224	no_sweep	0	AAQ_g97598_1	in	UniRef100_UPI0012B11271	14.936	pyruvate:ferredoxin (flavodoxin) oxidoreductase	200	syn	L->L	ko:K03737	EKR,Fer4,Fer4_16,Fer4_7,PFOR_II,POR,POR_N,TPP_enzyme_C	-	-	-	-	-	-	-	-
39	AAQ_1	AAQ_1_182	AAQ	k77_362641	1470	sub_T	224	no_sweep	0	AAQ_g55079_2	in	UniRef100_UPI0012AF8DBC	99.7	ATP-binding cassette domain-containing protein	1505	syn	K->K	ko:K06158	ABC_tran,ABC_tran_CTD,ABC_tran_Xtn	-	-	-	-	-	-	-	-
39	AAQ_1	AAQ_1_183	AAQ	k77_377800	930	sub_A	224	no_sweep	0	AAQ_g52033_3	in	UniRef100_A0A395ZFC7	100	3-oxoacyl-[acyl-carrier-protein] synthase 3	738	syn	Li->Li	ko:K00648	ACP_syn_III,ACP_syn_III_C	-	-	-	-	-	-	-	-
39	AAQ_1	AAQ_1_184	AAQ	k77_377800	9572	sub_A	224	no_sweep	0	AAQ_g52033_11	in	UniRef100_A0A355TQJ2	90.691	Glycosyl transferase	1604	syn	Y->Y	ko:K05366	Transgly,Transpeptidase	-	-	-	-	-	-	-	-
39	AAQ_1	AAQ_1_185	AAQ	k77_377800	10622	sub_T	224	no_sweep	0	AAQ_g52033_11	in	UniRef100_A0A355TQJ2	90.691	Glycosyl transferase	554	syn	E->E	ko:K05366	Transgly,Transpeptidase	-	-	-	-	-	-	-	-
39	AAQ_1	AAQ_1_186	AAQ	k77_377800	10634	sub_A	224	no_sweep	0	AAQ_g52033_11	in	UniRef100_A0A355TQJ2	90.691	Glycosyl transferase	542	syn	N->N	ko:K05366	Transgly,Transpeptidase	-	-	-	-	-	-	-	-
39	AAQ_1	AAQ_1_187	AAQ	k77_377800	10659	sub_G	224	no_sweep	0	AAQ_g52033_11	in	UniRef100_A0A355TQJ2	90.691	Glycosyl transferase	517	non_syn	E->A	ko:K05366	Transgly,Transpeptidase	-	-	-	-	-	-	-	-
39	AAQ_1	AAQ_1_188	AAQ	k77_381880	5371	sub_A	224	no_sweep	0	AAQ_g8043_6	in	UniRef100_A0A3D1NYY7	14.849	Beta-galactosidase	9	non_syn	D->N	ko:K01190	Bgal_small_N,DUF4981,Glyco_hydro_2,Glyco_hydro_2_C,Glyco_hydro_2_N	-	-	-	-	-	-	-	-
39	AAQ_1	AAQ_1_189	AAQ	k77_39106	591	sub_C	224	no_sweep	0	AAQ_g39574_2	in	UniRef100_D6DYY6	55.882	Uncharacterized protein	50	non_syn	Ii->Mi			-	-	-	-	-	-	-	-
39	AAQ_1	AAQ_1_190	AAQ	k77_403087	2860	sub_T	224	no_sweep	0	AAQ_g95571_4	in	UniRef100_A0A0M6WW70	90.448	DUF4186 domain-containing protein	155	syn	G->G	-	DUF4186	-	-	-	-	-	-	-	-
39	AAQ_1	AAQ_1_191	AAQ	k77_407211	1339	sub_G	224	no_sweep	0	AAQ_g65905_1	downstream	UniRef100_A0A3E4EEK2	99.6	Histidinol-phosphatase	982	undefined	undefined	ko:K04486	PHP	AAQ_g65905_2	downstream	UniRef100_C4Z951	99.5	Nicotinate phosphoribosyltransferase	1830	undefined	undefined	ko:K00763	NAPRTase
39	AAQ_1	AAQ_1_192	AAQ	k77_409663	16720	sub_A	224	no_sweep	0	AAQ_g101528_16	in	UniRef100_A0A396FHM1	96.9	DUF2974 domain-containing protein	137	syn	K->K	-	DUF2974	-	-	-	-	-	-	-	-
39	AAQ_1	AAQ_1_193	AAQ	k77_409663	18926	sub_C	224	no_sweep	0	AAQ_g101528_18	in	UniRef100_A0A396FIA1	99.8	AAA family ATPase	383	syn	D->D	-	AAA	-	-	-	-	-	-	-	-
39	AAQ_1	AAQ_1_194	AAQ	k77_409663	19538	sub_G	224	no_sweep	0	AAQ_g101528_18	in	UniRef100_A0A396FIA1	99.8	AAA family ATPase	995	syn	S->S	-	AAA	-	-	-	-	-	-	-	-
39	AAQ_1	AAQ_1_195	AAQ	k77_409663	21087	sub_T	224	no_sweep	0	AAQ_g101528_19	in	UniRef100_A0A173VDP2	100	Aminotransferase class I/II-fold pyridoxal phosphate-dependent enzyme	1004	syn	F->F	ko:K14260	Aminotran_1_2,HTH_3	-	-	-	-	-	-	-	-
39	AAQ_1	AAQ_1_196	AAQ	k77_409663	50092	sub_G	224	no_sweep	0	AAQ_g101528_42	in	UniRef100_A0A173WJG5	100	Cobalt-precorrin-4 C(11)-methyltransferase	140	syn	S->S	ko:K05936	TP_methylase	-	-	-	-	-	-	-	-
39	AAQ_1	AAQ_1_197	AAQ	k77_417737	13303	sub_G	224	no_sweep	0	AAQ_g100758_12	in	UniRef100_D4JJC0	100	Arabinogalactan endo-beta-1,4-galactanase	776	syn	Y->Y	ko:K01224	Glyco_hydro_53	-	-	-	-	-	-	-	-
39	AAQ_1	AAQ_1_198	AAQ	k77_431114	5172	sub_C	224	no_sweep	0	AAQ_g83886_6	in	UniRef100_UPI0012AEF254	99.9	primosomal protein N'	1961	syn	S->S	ko:K04066	DEAD,Helicase_C,ResIII	-	-	-	-	-	-	-	-
39	AAQ_1	AAQ_1_199	AAQ	k77_431114	5184	sub_T	224	no_sweep	0	AAQ_g83886_6	in	UniRef100_UPI0012AEF254	99.9	primosomal protein N'	1949	syn	V->V	ko:K04066	DEAD,Helicase_C,ResIII	-	-	-	-	-	-	-	-
39	AAQ_1	AAQ_1_200	AAQ	k77_431114	27442	sub_C	224	no_sweep	0	AAQ_g83886_20	in	UniRef100_A0A350VHM4	99.6	Uncharacterized protein	42	non_syn	K->E	-	-	-	-	-	-	-	-	-	-
39	AAQ_1	AAQ_1_201	AAQ	k77_431114	27452	sub_T	224	no_sweep	0	AAQ_g83886_20	in	UniRef100_A0A350VHM4	99.6	Uncharacterized protein	32	syn	T->T	-	-	-	-	-	-	-	-	-	-
39	AAQ_1	AAQ_1_202	AAQ	k77_431538	24953	sub_A	224	no_sweep	0	AAQ_g89731_21	in	UniRef100_A0A414LWC2	96.1	Lactaldehyde reductase	368	syn	G->G	ko:K00048	Fe-ADH	-	-	-	-	-	-	-	-
39	AAQ_1	AAQ_1_203	AAQ	k77_452800	4984	sub_C	224	no_sweep	0	AAQ_g80560_7	in	UniRef100_A0A413Q2H4	99.8	DNA polymerase III subunit gamma/tau	470	syn	T->T	ko:K02343	DNA_pol3_delta2,DNA_pol3_gamma3	-	-	-	-	-	-	-	-
39	AAQ_1	AAQ_1_204	AAQ	k77_452800	5458	sub_G	224	no_sweep	0	AAQ_g80560_7	in	UniRef100_A0A413Q2H4	99.8	DNA polymerase III subunit gamma/tau	944	syn	A->A	ko:K02343	DNA_pol3_delta2,DNA_pol3_gamma3	-	-	-	-	-	-	-	-
39	AAQ_1	AAQ_1_205	AAQ	k77_452800	5471	sub_G	224	no_sweep	0	AAQ_g80560_7	in	UniRef100_A0A413Q2H4	99.8	DNA polymerase III subunit gamma/tau	957	non_syn	S->A	ko:K02343	DNA_pol3_delta2,DNA_pol3_gamma3	-	-	-	-	-	-	-	-
39	AAQ_1	AAQ_1_206	AAQ	k77_452800	5494	sub_A	224	no_sweep	0	AAQ_g80560_7	in	UniRef100_A0A413Q2H4	99.8	DNA polymerase III subunit gamma/tau	980	syn	T->T	ko:K02343	DNA_pol3_delta2,DNA_pol3_gamma3	-	-	-	-	-	-	-	-
39	AAQ_1	AAQ_1_207	AAQ	k77_455070	3926	sub_A	224	no_sweep	0	AAQ_g7694_4	in	UniRef100_R6TYF0	99.4	Anthranilate phosphoribosyltransferase	905	syn	Ii->Ii	ko:K00766,ko:K13497	GATase,Glycos_trans_3N,Glycos_transf_3	-	-	-	-	-	-	-	-
39	AAQ_1	AAQ_1_208	AAQ	k77_455070	3931	sub_A	224	no_sweep	0	AAQ_g7694_4	in	UniRef100_R6TYF0	99.4	Anthranilate phosphoribosyltransferase	910	non_syn	G->E	ko:K00766,ko:K13497	GATase,Glycos_trans_3N,Glycos_transf_3	-	-	-	-	-	-	-	-
39	AAQ_1	AAQ_1_209	AAQ	k77_456917	29826	sub_C	224	no_sweep	0	AAQ_g34392_25	in	UniRef100_A0A0M6WK24	100	Uncharacterized protein	195	non_syn	Mi->Li	ko:K06298	Germane	-	-	-	-	-	-	-	-
39	AAQ_1	AAQ_1_210	AAQ	k77_462237	1450	sub_A	224	no_sweep	0	AAQ_g4775_2	in	UniRef100_A0A0M6WFZ2	100	tRNA N6-adenosine threonylcarbamoyltransferase	569	syn	G->G	ko:K01409	Peptidase_M22	-	-	-	-	-	-	-	-
39	AAQ_1	AAQ_1_211	AAQ	k77_462237	2469	sub_A	224	no_sweep	0	AAQ_g4775_3	in	UniRef100_A0A0M6WER5	98.5	Ribonuclease Z	575	syn	L->L	ko:K00784	Lactamase_B_2	-	-	-	-	-	-	-	-
39	AAQ_1	AAQ_1_212	AAQ	k77_462237	4443	sub_G	224	no_sweep	0	AAQ_g4775_6	in	UniRef100_A0A0M6WDA8	100	Uncharacterized protein	203	syn	T->T	ko:K06925	TsaE	-	-	-	-	-	-	-	-
39	AAQ_1	AAQ_1_213	AAQ	k77_464779	3520	sub_G	224	no_sweep	0	AAQ_g41174_4	in	UniRef100_A0A350VK38	100	Cysteine desulfurase IscS	839	syn	Ii->Ii	ko:K04487	Aminotran_5	-	-	-	-	-	-	-	-
39	AAQ_1	AAQ_1_214	AAQ	k77_464779	3526	sub_G	224	no_sweep	0	AAQ_g41174_4	in	UniRef100_A0A350VK38	100	Cysteine desulfurase IscS	833	syn	S->S	ko:K04487	Aminotran_5	-	-	-	-	-	-	-	-
39	AAQ_1	AAQ_1_215	AAQ	k77_468764	2761	sub_T	224	no_sweep	0	AAQ_g94400_2	in	UniRef100_A0A2U2EIY1	98	DUF4445 domain-containing protein	1085	syn	P->P	-	DUF4445,Fer2	-	-	-	-	-	-	-	-
39	AAQ_1	AAQ_1_216	AAQ	k77_468764	3048	sub_C	224	no_sweep	0	AAQ_g94400_2	in	UniRef100_A0A2U2EIY1	98	DUF4445 domain-containing protein	1372	non_syn	K->T	-	DUF4445,Fer2	-	-	-	-	-	-	-	-
39	AAQ_1	AAQ_1_217	AAQ	k77_468764	3052	sub_T	224	no_sweep	0	AAQ_g94400_2	in	UniRef100_A0A2U2EIY1	98	DUF4445 domain-containing protein	1376	syn	P->P	-	DUF4445,Fer2	-	-	-	-	-	-	-	-
39	AAQ_1	AAQ_1_218	AAQ	k77_468764	3056	sub_A	224	no_sweep	0	AAQ_g94400_2	in	UniRef100_A0A2U2EIY1	98	DUF4445 domain-containing protein	1380	non_syn	D->N	-	DUF4445,Fer2	-	-	-	-	-	-	-	-
39	AAQ_1	AAQ_1_219	AAQ	k77_468764	3059	sub_A	224	no_sweep	0	AAQ_g94400_2	in	UniRef100_A0A2U2EIY1	98	DUF4445 domain-containing protein	1383	non_syn	Li->Mi	-	DUF4445,Fer2	-	-	-	-	-	-	-	-
39	AAQ_1	AAQ_1_220	AAQ	k77_468764	3061	sub_T	224	no_sweep	0	AAQ_g94400_2	in	UniRef100_A0A2U2EIY1	98	DUF4445 domain-containing protein	1385	non_syn	Li->F	-	DUF4445,Fer2	-	-	-	-	-	-	-	-
39	AAQ_1	AAQ_1_221	AAQ	k77_50849	6759	sub_T	224	no_sweep	0	AAQ_g90873_3	in	UniRef100_A0A348S8X7	100	Alpha-1,4 glucan phosphorylase	289	non_syn	T->N	ko:K00688	Phosphorylase	-	-	-	-	-	-	-	-
39	AAQ_1	AAQ_1_222	AAQ	k77_86742	3916	sub_C	224	no_sweep	0	AAQ_g95648_5	in	UniRef100_UPI0012AF7206	98.8	type II toxin-antitoxin system HipA family toxin	431	syn	A->A	ko:K07154	Couple_hipA,HipA_C	-	-	-	-	-	-	-	-
39	AAQ_1	AAQ_1_223	AAQ	k77_97831	6200	sub_C	224	no_sweep	0	AAQ_g36555_6	in	UniRef100_A0A0M6WBZ6	99.4	Predicted AAA-ATPase	1241	syn	E->E	-	AAA-ATPase_like,PDDEXK_9	-	-	-	-	-	-	-	-
39	AAQ_1	AAQ_1_224	AAQ	k77_97831	8045	sub_G	224	no_sweep	0	AAQ_g36555_7	in	UniRef100_A0A0M6WC68	99.8	Glycosidase	1043	syn	H->H	ko:K00690,ko:K21350	Alpha-amylase	-	-	-	-	-	-	-	-
39	AAQ_1	AAQ_1_225	AAQ	k77_160692	16549	sub_A	29	no_sweep	0	AAQ_g93861_17	in	UniRef100_A0A1Q6PCE4	51.393	Sugar ABC transporter substrate-binding protein	586	non_syn	G->E	ko:K17318	SBP_bac_1,SBP_bac_8	-	-	-	-	-	-	-	-
39	AAQ_1	AAQ_1_226	AAQ	k77_182197	1596	sub_G	29	no_sweep	0	AAQ_g82475_2	in	UniRef100_A0A0M6WT18	100	Polyamine aminopropyltransferase	506	syn	K->K	ko:K00797	Spermine_synt_N,Spermine_synth	-	-	-	-	-	-	-	-
39	AAQ_1	AAQ_1_227	AAQ	k77_182197	1599	sub_A	29	no_sweep	0	AAQ_g82475_2	in	UniRef100_A0A0M6WT18	100	Polyamine aminopropyltransferase	509	syn	E->E	ko:K00797	Spermine_synt_N,Spermine_synth	-	-	-	-	-	-	-	-
39	AAQ_1	AAQ_1_228	AAQ	k77_205855	4874	sub_G	29	no_sweep	0	AAQ_g9674_4	in	UniRef100_A0A2U2EED8	100	Histidine kinase	1313	syn	A->A	ko:K07718	HAMP,HATPase_c,His_kinase	-	-	-	-	-	-	-	-
39	AAQ_1	AAQ_1_229	AAQ	k77_205855	5563	sub_G	29	no_sweep	0	AAQ_g9674_5	in	UniRef100_A0A0M6WGV8	100	DNA-binding response regulator	224	syn	K->K	ko:K07720	HTH_18,Response_reg	-	-	-	-	-	-	-	-
39	AAQ_1	AAQ_1_230	AAQ	k77_456917	45467	sub_A	29	no_sweep	0	AAQ_g34392_39	in	UniRef100_A0A174G4L0	100	Glutaconyl-CoA decarboxylase subunit beta	479	syn	A->A	ko:K01572	OAD_beta	-	-	-	-	-	-	-	-
39	AAQ_1	AAQ_1_231	AAQ	k77_49281	2909	sub_C	29	no_sweep	0	AAQ_g69256_3	in	UniRef100_A0A3E4E8X9	100	Aspartyl/glutamyl-tRNA(Asn/Gln) amidotransferase subunit B	833	syn	L->L	ko:K02434	GatB_N,GatB_Yqey	-	-	-	-	-	-	-	-
39	AAQ_1	AAQ_1_232	AAQ	k77_119957	3873	sub_C	29	no_sweep	0	AAQ_g38633_3	in	UniRef100_A0A0M6WFM3	100	Reducing end xylose-releasing exo-oligoxylanase	962	syn	H->H	ko:K15531	Glyco_hydro_8	-	-	-	-	-	-	-	-
39	AAQ_1	AAQ_1_233	AAQ	k77_119957	3876	sub_T	29	no_sweep	0	AAQ_g38633_3	in	UniRef100_A0A0M6WFM3	100	Reducing end xylose-releasing exo-oligoxylanase	965	syn	P->P	ko:K15531	Glyco_hydro_8	-	-	-	-	-	-	-	-
39	AAQ_1	AAQ_1_234	AAQ	k77_165296	16478	sub_A	29	no_sweep	0	AAQ_g55210_16	in	UniRef100_C4ZBD4	91.6	50S ribosomal protein L3	419	syn	K->K	ko:K02906	Ribosomal_L3	-	-	-	-	-	-	-	-
39	AAQ_1	AAQ_1_235	AAQ	k77_182197	4805	sub_C	29	no_sweep	0	AAQ_g82475_5	in	UniRef100_A0A3E4E7Q0	99.7	Putative agmatine deiminase	374	syn	C->C	ko:K10536	PAD_porph	-	-	-	-	-	-	-	-
39	AAQ_1	AAQ_1_236	AAQ	k77_182197	4991	sub_A	29	no_sweep	0	AAQ_g82475_5	in	UniRef100_A0A3E4E7Q0	99.7	Putative agmatine deiminase	560	syn	L->L	ko:K10536	PAD_porph	-	-	-	-	-	-	-	-
39	AAQ_1	AAQ_1_237	AAQ	k77_205855	1530	sub_G	29	no_sweep	0	AAQ_g9674_3	in	UniRef100_A0A0M6WFN5	100	Beta-glucosidase	210	non_syn	T->A	ko:K05349	Fn3-like,Glyco_hydro_3,Glyco_hydro_3_C	-	-	-	-	-	-	-	-
39	AAQ_1	AAQ_1_238	AAQ	k77_261835	2263	sub_T	29	no_sweep	0	AAQ_g71066_3	in	UniRef100_A0A395ZIJ8	100	Extracellular solute-binding protein	553	non_syn	T->K	ko:K10117	SBP_bac_1,SBP_bac_8	-	-	-	-	-	-	-	-
39	AAQ_1	AAQ_1_239	AAQ	k77_261835	2568	sub_A	29	no_sweep	0	AAQ_g71066_3	in	UniRef100_A0A395ZIJ8	100	Extracellular solute-binding protein	248	syn	F->F	ko:K10117	SBP_bac_1,SBP_bac_8	-	-	-	-	-	-	-	-
39	AAQ_1	AAQ_1_240	AAQ	k77_39445	1782	sub_A	29	no_sweep	0	AAQ_g44107_2	in	UniRef100_D4JPD0	99.1	Beta-galactosidase/beta-glucuronidase	1043	syn	E->E	-	DUF4982,Glyco_hydro_2,Glyco_hydro_2_C,Glyco_hydro_2_N	-	-	-	-	-	-	-	-
39	AAQ_1	AAQ_1_241	AAQ	k77_394695	2343	sub_G	29	no_sweep	0	AAQ_g84135_2	in	UniRef100_A0A5S4VGA1	82.754	Glycoside hydrolase family 31 protein	533	syn	Ii->Ii	ko:K01187	DUF4968,DUF5110,Gal_mutarotas_2,Glyco_hydro_31	-	-	-	-	-	-	-	-
39	AAQ_1	AAQ_1_242	AAQ	k77_394695	2369	sub_T	29	no_sweep	0	AAQ_g84135_2	in	UniRef100_A0A5S4VGA1	82.754	Glycoside hydrolase family 31 protein	507	non_syn	E->K	ko:K01187	DUF4968,DUF5110,Gal_mutarotas_2,Glyco_hydro_31	-	-	-	-	-	-	-	-
39	AAQ_1	AAQ_1_243	AAQ	k77_456917	46464	sub_A	29	no_sweep	0	AAQ_g34392_40	in	UniRef100_A0A0M6WK66	100	Methylmalonyl-CoA carboxyltransferase 5S subunit	305	syn	V->V	ko:K01571	HMGL-like,PYC_OADA	-	-	-	-	-	-	-	-
39	AAQ_1	AAQ_1_244	AAQ	k77_456917	46476	sub_T	29	no_sweep	0	AAQ_g34392_40	in	UniRef100_A0A0M6WK66	100	Methylmalonyl-CoA carboxyltransferase 5S subunit	317	syn	F->F	ko:K01571	HMGL-like,PYC_OADA	-	-	-	-	-	-	-	-
39	AAQ_1	AAQ_1_245	AAQ	k77_456917	46488	sub_T	29	no_sweep	0	AAQ_g34392_40	in	UniRef100_A0A0M6WK66	100	Methylmalonyl-CoA carboxyltransferase 5S subunit	329	syn	S->S	ko:K01571	HMGL-like,PYC_OADA	-	-	-	-	-	-	-	-
39	AAQ_1	AAQ_1_246	AAQ	k77_464779	563	sub_T	29	no_sweep	0	AAQ_g41174_1	in	UniRef100_UPI0012B12562	79.025	AAA family ATPase	556	non_syn	G->E	ko:K06921	AAA_14,ATPase_2,DUF234	-	-	-	-	-	-	-	-
39	AAQ_1	AAQ_1_247	AAQ	k77_97831	8831	sub_G	29	no_sweep	0	AAQ_g36555_7	in	UniRef100_A0A0M6WC68	99.8	Glycosidase	257	syn	N->N	ko:K00690,ko:K21350	Alpha-amylase	-	-	-	-	-	-	-	-
39	AAQ_1	AAQ_1_248	AAQ	k77_97831	8843	sub_A	29	no_sweep	0	AAQ_g36555_7	in	UniRef100_A0A0M6WC68	99.8	Glycosidase	245	syn	D->D	ko:K00690,ko:K21350	Alpha-amylase	-	-	-	-	-	-	-	-
39	AAQ_1	AAQ_1_249	AAQ	k77_97831	9590	sub_G	29	no_sweep	0	AAQ_g36555_8	in	UniRef100_A0A350VK07	62.473	Alpha-galactosidase	1263	syn	Li->Li	ko:K07407	Glyco_hydro_36C,Glyco_hydro_36N,Melibiase,PRK	-	-	-	-	-	-	-	-
39	AAQ_1	AAQ_1_250	AAQ	k77_97831	9591	sub_G	29	no_sweep	0	AAQ_g36555_8	in	UniRef100_A0A350VK07	62.473	Alpha-galactosidase	1262	syn	F->F	ko:K07407	Glyco_hydro_36C,Glyco_hydro_36N,Melibiase,PRK	-	-	-	-	-	-	-	-
39	AAQ_1	AAQ_1_251	AAQ	k77_97831	9799	sub_A	29	no_sweep	0	AAQ_g36555_8	in	UniRef100_A0A350VK07	62.473	Alpha-galactosidase	1054	non_syn	T->Ii	ko:K07407	Glyco_hydro_36C,Glyco_hydro_36N,Melibiase,PRK	-	-	-	-	-	-	-	-
39	AAQ_1	AAQ_1_252	AAQ	k77_97831	9800	sub_C	29	no_sweep	0	AAQ_g36555_8	in	UniRef100_A0A350VK07	62.473	Alpha-galactosidase	1053	non_syn	T->A	ko:K07407	Glyco_hydro_36C,Glyco_hydro_36N,Melibiase,PRK	-	-	-	-	-	-	-	-
39	AAQ_1	AAQ_1_253	AAQ	k77_97831	9801	sub_G	29	no_sweep	0	AAQ_g36555_8	in	UniRef100_A0A350VK07	62.473	Alpha-galactosidase	1052	syn	A->A	ko:K07407	Glyco_hydro_36C,Glyco_hydro_36N,Melibiase,PRK	-	-	-	-	-	-	-	-
39	AAQ_1	AAQ_1_254	AAQ	k77_243860	255	sub_C	27	no_sweep	0	AAQ_g27447_2	in	UniRef100_A0A174LXU5	94.4	HTH-type transcriptional regulator immR	431	non_syn	F->Li	-	HTH_3	-	-	-	-	-	-	-	-
39	AAQ_1	AAQ_1_255	AAQ	k77_413096	10439	sub_T	27	no_sweep	0	AAQ_g35948_9	in	UniRef100_A0A174IAR8	99.2	Neopullulanase	2103	non_syn	D->N	-	AMPK1_CBM,Alpha-amylase,PUD	-	-	-	-	-	-	-	-
39	AAQ_1	AAQ_1_256	AAQ	k77_24063	1176	sub_G	27	no_sweep	0	AAQ_g30227_2	in	UniRef100_UPI0002D1EEAF	97.044	DUF1819 family protein	98	syn	S->S	-	DUF1819	-	-	-	-	-	-	-	-
39	AAQ_1	AAQ_1_257	AAQ	k77_24063	1189	sub_G	27	no_sweep	0	AAQ_g30227_2	in	UniRef100_UPI0002D1EEAF	97.044	DUF1819 family protein	85	non_syn	V->A	-	DUF1819	-	-	-	-	-	-	-	-
39	AAQ_1	AAQ_1_258	AAQ	k77_403087	1340	sub_C	27	no_sweep	0	AAQ_g95571_2	in	UniRef100_A0A3E4E5C0	97.2	Macro domain-containing protein	452	non_syn	V->Vi	-	Macro	-	-	-	-	-	-	-	-
39	AAQ_1	AAQ_1_259	AAQ	k77_403087	1412	sub_C	27	no_sweep	0	AAQ_g95571_2	in	UniRef100_A0A3E4E5C0	97.2	Macro domain-containing protein	380	syn	K->K	-	Macro	-	-	-	-	-	-	-	-
39	AAQ_1	AAQ_1_260	AAQ	k77_403087	1418	sub_C	27	no_sweep	0	AAQ_g95571_2	in	UniRef100_A0A3E4E5C0	97.2	Macro domain-containing protein	374	syn	K->K	-	Macro	-	-	-	-	-	-	-	-
39	AAQ_1	AAQ_1_261	AAQ	k77_403087	1439	sub_C	27	no_sweep	0	AAQ_g95571_2	in	UniRef100_A0A3E4E5C0	97.2	Macro domain-containing protein	353	syn	T->T	-	Macro	-	-	-	-	-	-	-	-
39	AAQ_1	AAQ_1_262	AAQ	k77_403087	1457	sub_T	27	no_sweep	0	AAQ_g95571_2	in	UniRef100_A0A3E4E5C0	97.2	Macro domain-containing protein	335	syn	A->A	-	Macro	-	-	-	-	-	-	-	-
39	AAQ_1	AAQ_1_263	AAQ	k77_403087	1469	sub_G	27	no_sweep	0	AAQ_g95571_2	in	UniRef100_A0A3E4E5C0	97.2	Macro domain-containing protein	323	syn	C->C	-	Macro	-	-	-	-	-	-	-	-
39	AAQ_1	AAQ_1_264	AAQ	k77_403087	1481	sub_C	27	no_sweep	0	AAQ_g95571_2	in	UniRef100_A0A3E4E5C0	97.2	Macro domain-containing protein	311	non_syn	L->Li	-	Macro	-	-	-	-	-	-	-	-
39	AAQ_1	AAQ_1_265	AAQ	k77_403087	1511	sub_A	27	no_sweep	0	AAQ_g95571_2	in	UniRef100_A0A3E4E5C0	97.2	Macro domain-containing protein	281	syn	D->D	-	Macro	-	-	-	-	-	-	-	-
39	AAQ_1	AAQ_1_266	AAQ	k77_403087	1519	sub_A	27	no_sweep	0	AAQ_g95571_2	in	UniRef100_A0A3E4E5C0	97.2	Macro domain-containing protein	273	syn	Li->Li	-	Macro	-	-	-	-	-	-	-	-
39	AAQ_1	AAQ_1_267	AAQ	k77_403087	1592	sub_G	27	no_sweep	0	AAQ_g95571_2	in	UniRef100_A0A3E4E5C0	97.2	Macro domain-containing protein	200	syn	N->N	-	Macro	-	-	-	-	-	-	-	-
39	AAQ_1	AAQ_1_268	AAQ	k77_403087	1593	sub_C	27	no_sweep	0	AAQ_g95571_2	in	UniRef100_A0A3E4E5C0	97.2	Macro domain-containing protein	199	non_syn	N->S	-	Macro	-	-	-	-	-	-	-	-
39	AAQ_1	AAQ_1_269	AAQ	k77_403087	1616	sub_A	27	no_sweep	0	AAQ_g95571_2	in	UniRef100_A0A3E4E5C0	97.2	Macro domain-containing protein	176	syn	D->D	-	Macro	-	-	-	-	-	-	-	-
39	AAQ_1	AAQ_1_270	AAQ	k77_403087	1634	sub_G	27	no_sweep	0	AAQ_g95571_2	in	UniRef100_A0A3E4E5C0	97.2	Macro domain-containing protein	158	syn	G->G	-	Macro	-	-	-	-	-	-	-	-
39	AAQ_1	AAQ_1_271	AAQ	k77_403087	1640	sub_G	27	no_sweep	0	AAQ_g95571_2	in	UniRef100_A0A3E4E5C0	97.2	Macro domain-containing protein	152	syn	N->N	-	Macro	-	-	-	-	-	-	-	-
39	AAQ_1	AAQ_1_272	AAQ	k77_403087	1644	sub_G	27	no_sweep	0	AAQ_g95571_2	in	UniRef100_A0A3E4E5C0	97.2	Macro domain-containing protein	148	non_syn	Vi->A	-	Macro	-	-	-	-	-	-	-	-
39	AAQ_1	AAQ_1_273	AAQ	k77_403087	1707	sub_G	27	no_sweep	0	AAQ_g95571_2	in	UniRef100_A0A3E4E5C0	97.2	Macro domain-containing protein	85	non_syn	V->A	-	Macro	-	-	-	-	-	-	-	-
39	AAQ_1	AAQ_1_274	AAQ	k77_403087	1743	sub_A	27	no_sweep	0	AAQ_g95571_2	in	UniRef100_A0A3E4E5C0	97.2	Macro domain-containing protein	49	non_syn	A->V	-	Macro	-	-	-	-	-	-	-	-
39	AAQ_1	AAQ_1_275	AAQ	k77_403087	1775	sub_G	27	no_sweep	0	AAQ_g95571_2	in	UniRef100_A0A3E4E5C0	97.2	Macro domain-containing protein	17	syn	V->V	-	Macro	-	-	-	-	-	-	-	-
39	AAQ_1	AAQ_1_276	AAQ	k77_403087	2839	sub_T	27	no_sweep	0	AAQ_g95571_4	in	UniRef100_A0A0M6WW70	90.448	DUF4186 domain-containing protein	176	syn	G->G	-	DUF4186	-	-	-	-	-	-	-	-
39	AAQ_1	AAQ_1_277	AAQ	k77_403087	2842	sub_A	27	no_sweep	0	AAQ_g95571_4	in	UniRef100_A0A0M6WW70	90.448	DUF4186 domain-containing protein	173	non_syn	K->N	-	DUF4186	-	-	-	-	-	-	-	-
39	AAQ_1	AAQ_1_278	AAQ	k77_403087	2843	sub_C	27	no_sweep	0	AAQ_g95571_4	in	UniRef100_A0A0M6WW70	90.448	DUF4186 domain-containing protein	172	non_syn	K->R	-	DUF4186	-	-	-	-	-	-	-	-
39	AAQ_1	AAQ_1_279	AAQ	k77_403087	2844	sub_G	27	no_sweep	0	AAQ_g95571_4	in	UniRef100_A0A0M6WW70	90.448	DUF4186 domain-containing protein	171	non_syn	K->Q	-	DUF4186	-	-	-	-	-	-	-	-
39	AAQ_1	AAQ_1_280	AAQ	k77_403087	2857	sub_T	27	no_sweep	0	AAQ_g95571_4	in	UniRef100_A0A0M6WW70	90.448	DUF4186 domain-containing protein	158	syn	K->K	-	DUF4186	-	-	-	-	-	-	-	-
39	AAQ_1	AAQ_1_281	AAQ	k77_286956	20112	sub_G	1	no_sweep	0	AAQ_g13034_19	in	UniRef100_A0A396FNS0	99.6	Acetyl xylan esterase	912	non_syn	C->R	-	CBM_4_9,CBM_6,Esterase,Glyco_hydro_43	-	-	-	-	-	-	-	-
39	AAQ_1	AAQ_1_282	AAQ	k77_286956	20208	sub_A	9	no_sweep	0	AAQ_g13034_19	in	UniRef100_A0A396FNS0	99.6	Acetyl xylan esterase	816	non_syn	F->V	-	CBM_4_9,CBM_6,Esterase,Glyco_hydro_43	-	-	-	-	-	-	-	-
39	AAQ_1	AAQ_1_283	AAQ	k77_286956	20876	sub_G	9	no_sweep	0	AAQ_g13034_19	in	UniRef100_A0A396FNS0	99.6	Acetyl xylan esterase	148	non_syn	A->Vi	-	CBM_4_9,CBM_6,Esterase,Glyco_hydro_43	-	-	-	-	-	-	-	-
39	AAQ_1	AAQ_1_284	AAQ	k77_403087	1097	sub_G	9	no_sweep	0	AAQ_g95571_2	in	UniRef100_A0A3E4E5C0	97.2	Macro domain-containing protein	695	syn	D->D	-	Macro	-	-	-	-	-	-	-	-
39	AAQ_1	AAQ_1_285	AAQ	k77_403087	1907	sub_T	9	no_sweep	0	AAQ_g95571_3	in	UniRef100_A0A3E4E618	99.6	Uncharacterized protein	644	syn	P->P	-	-	-	-	-	-	-	-	-	-
39	AAQ_1	AAQ_1_286	AAQ	k77_403087	1911	sub_T	9	no_sweep	0	AAQ_g95571_3	in	UniRef100_A0A3E4E618	99.6	Uncharacterized protein	640	non_syn	S->N	-	-	-	-	-	-	-	-	-	-
39	AAQ_1	AAQ_1_287	AAQ	k77_403087	2368	sub_T	9	no_sweep	0	AAQ_g95571_3	in	UniRef100_A0A3E4E618	99.6	Uncharacterized protein	183	non_syn	D->N	-	-	-	-	-	-	-	-	-	-
39	AAQ_1	AAQ_1_288	AAQ	k77_403087	2447	sub_G	9	no_sweep	0	AAQ_g95571_3	in	UniRef100_A0A3E4E618	99.6	Uncharacterized protein	104	syn	G->G	-	-	-	-	-	-	-	-	-	-
39	AAQ_1	AAQ_1_289	AAQ	k77_403087	2749	sub_T	9	no_sweep	0	AAQ_g95571_4	in	UniRef100_A0A0M6WW70	90.448	DUF4186 domain-containing protein	266	non_syn	Li->L	-	DUF4186	-	-	-	-	-	-	-	-
39	AAQ_1	AAQ_1_290	AAQ	k77_403087	2751	sub_G	9	no_sweep	0	AAQ_g95571_4	in	UniRef100_A0A0M6WW70	90.448	DUF4186 domain-containing protein	264	syn	Li->Li	-	DUF4186	-	-	-	-	-	-	-	-
40	AAQ_2	AAQ_2_1	AAQ	k77_101418	3149	sub_A	1	no_sweep	0	AAQ_g86895_5	in	UniRef100_A0A3E4MW90	97.678	Sensor histidine kinase	1365	syn	Li->Li	ko:K07636	HATPase_c,HisKA	-	-	-	-	-	-	-	-
40	AAQ_2	AAQ_2_2	AAQ	k77_112170	175669	del_2	9	no_sweep	0	AAQ_g34552_156	in	UniRef100_B5CWG5	27.218	Outer membrane efflux protein	356	unknown	unknown	-	OEP	-	-	-	-	-	-	-	-
40	AAQ_2	AAQ_2_3	AAQ	k77_27661	10603	sub_T	9	no_sweep	0	AAQ_g79840_11	in	UniRef100_A0A642Q266	100	Site-specific integrase	944	syn	A->A	-	Arm-DNA-bind_5,Phage_int_SAM_5,Phage_integrase	-	-	-	-	-	-	-	-
40	AAQ_2	AAQ_2_4	AAQ	k77_27661	10608	sub_T	9	no_sweep	0	AAQ_g79840_11	in	UniRef100_A0A642Q266	100	Site-specific integrase	949	non_syn	A->V	-	Arm-DNA-bind_5,Phage_int_SAM_5,Phage_integrase	-	-	-	-	-	-	-	-
40	AAQ_2	AAQ_2_5	AAQ	k77_27661	10624	sub_A	9	no_sweep	0	AAQ_g79840_11	in	UniRef100_A0A642Q266	100	Site-specific integrase	965	non_syn	Li->L	-	Arm-DNA-bind_5,Phage_int_SAM_5,Phage_integrase	-	-	-	-	-	-	-	-
40	AAQ_2	AAQ_2_6	AAQ	k77_27661	10631	sub_A	9	no_sweep	0	AAQ_g79840_11	in	UniRef100_A0A642Q266	100	Site-specific integrase	972	non_syn	D->N	-	Arm-DNA-bind_5,Phage_int_SAM_5,Phage_integrase	-	-	-	-	-	-	-	-
40	AAQ_2	AAQ_2_7	AAQ	k77_27661	16897	sub_G	9	no_sweep	0	AAQ_g79840_22	in	UniRef100_A0A642Q2U2	100	Uncharacterized protein	209	syn	N->N	-	-	-	-	-	-	-	-	-	-
40	AAQ_2	AAQ_2_8	AAQ	k77_27661	16922	sub_T	9	no_sweep	0	AAQ_g79840_22	in	UniRef100_A0A642Q2U2	100	Uncharacterized protein	184	non_syn	R->Q	-	-	-	-	-	-	-	-	-	-
40	AAQ_2	AAQ_2_9	AAQ	k77_112170	134517	sub_G	9	no_sweep	0	AAQ_g34552_126	in	UniRef100_B5CWJ9	99.6	Arylsulfatase	703	non_syn	V->A	-	DUF4976,Sulfatase	-	-	-	-	-	-	-	-
40	AAQ_2	AAQ_2_10	AAQ	k77_185173	37849	ins_A	9	no_sweep	0	AAQ_g26266_30	in	UniRef100_B5CTU0	97.88	Glycosyltransferase, group 2 family protein	915	unknown	unknown	-	Glycos_transf_2	-	-	-	-	-	-	-	-
40	AAQ_2	AAQ_2_11	AAQ	k77_145528	1797	sub_G	16	no_sweep	0	AAQ_g85539_1	upstream	UniRef100_B5D414	98.5	SASA domain-containing protein	-251	undefined	undefined	ko:K05970	SASA	AAQ_g85539_2	upstream	UniRef100_A0A3E4Z5H7	99.6	Pyrroline-5-carboxylate reductase	-208	undefined	undefined	ko:K00286	F420_oxidored,P5CR_dimer
40	AAQ_2	AAQ_2_12	AAQ	k77_153821	16154	del_1	16	no_sweep	0	AAQ_g103414_13	in	UniRef100_R5W022	99.8	Uncharacterized protein	153	unknown	unknown	ko:K16345	Xan_ur_permease	-	-	-	-	-	-	-	-
40	AAQ_2	AAQ_2_13	AAQ	k77_272981	61897	sub_T	16	no_sweep	0	AAQ_g25390_57	in	UniRef100_R5VFF1	98.1	Lipoprotein signal peptidase	124	non_syn	T->Ii	ko:K03101	Peptidase_A8	-	-	-	-	-	-	-	-
40	AAQ_2	AAQ_2_14	AAQ	k77_27661	16030	sub_A	16	no_sweep	0	AAQ_g79840_21	in	UniRef100_A0A642Q275	100	Helix-turn-helix domain-containing protein	28	non_syn	G->E	-	HTH_17	-	-	-	-	-	-	-	-
40	AAQ_2	AAQ_2_15	AAQ	k77_27661	16044	sub_T	16	no_sweep	0	AAQ_g79840_21	in	UniRef100_A0A642Q275	100	Helix-turn-helix domain-containing protein	42	syn	Li->Li	-	HTH_17	-	-	-	-	-	-	-	-
40	AAQ_2	AAQ_2_16	AAQ	k77_294635	97347	sub_T	16	no_sweep	0	AAQ_g22282_83	in	UniRef100_A0A3E4MSA5	99.6	Transcription-repair-coupling factor	1476	non_syn	E->K	ko:K03723	CarD_CdnL_TRCF,DEAD,Helicase_C,TRCF	-	-	-	-	-	-	-	-
40	AAQ_2	AAQ_2_17	AAQ	k77_294635	101816	sub_C	16	no_sweep	0	AAQ_g22282_85	in	UniRef100_B5CYT3	94.525	Sigma factor regulatory protein, FecR/PupR family	482	syn	K->K	-	DUF4974,FecR	-	-	-	-	-	-	-	-
40	AAQ_2	AAQ_2_18	AAQ	k77_362304	8350	sub_T	16	no_sweep	0	AAQ_g50671_8	in	UniRef100_A0A3C0E4C7	87.761	AcrB/AcrD/AcrF family protein	2346	syn	Li->Li	-	ACR_tran	-	-	-	-	-	-	-	-
40	AAQ_2	AAQ_2_19	AAQ	k77_81302	12504	sub_T	16	no_sweep	0	AAQ_g10026_12	in	UniRef100_A0A1Q6G7Q0	100	Transporter	58	non_syn	G->D	ko:K07085	Asp-Al_Ex,TrkA_C	-	-	-	-	-	-	-	-
40	AAQ_2	AAQ_2_20	AAQ	k77_112170	100348	sub_G	16	no_sweep	0	AAQ_g34552_99	in	UniRef100_A0A415TDG6	98.157	Uncharacterized protein	259	non_syn	Y->C	-	DUF799	-	-	-	-	-	-	-	-
40	AAQ_2	AAQ_2_21	AAQ	k77_119256	6640	ins_CC	16	no_sweep	0	AAQ_g30107_5	in	UniRef100_UPI0003783AD5	64.997	family 43 glycosylhydrolase	999	unknown	unknown	ko:K01181,ko:K01198,ko:K01209	Glyco_hydro_10,Glyco_hydro_43	-	-	-	-	-	-	-	-
40	AAQ_2	AAQ_2_22	AAQ	k77_153821	18466	sub_A	16	no_sweep	0	AAQ_g103414_16	in	UniRef100_A0A415ST46	95.159	Alkaline phosphatase	276	non_syn	V->Ii	ko:K01077	Alk_phosphatase	-	-	-	-	-	-	-	-
40	AAQ_2	AAQ_2_23	AAQ	k77_342580	6132	sub_C	16	no_sweep	0	AAQ_g79119_5	in	UniRef100_B5D2K8	100	Uncharacterized protein	349	non_syn	Mi->T	-	-	-	-	-	-	-	-	-	-
40	AAQ_2	AAQ_2_24	AAQ	k77_391628	18598	sub_G	16	no_sweep	0	AAQ_g45658_9	in	UniRef100_B5CVA9	99.6	Putative alpha-1,2-mannosidase	1697	syn	K->K	-	Glyco_hydro_92	-	-	-	-	-	-	-	-
40	AAQ_2	AAQ_2_25	AAQ	k77_397563	40237	sub_T	16	no_sweep	0	AAQ_g23850_25	in	UniRef100_A0A412H6N1	95.5	Secretion protein	568	non_syn	R->H	-	BSP,Reprolysin_3	-	-	-	-	-	-	-	-
40	AAQ_2	AAQ_2_26	AAQ	k77_5187	15767	del_1	16	no_sweep	0	AAQ_g67753_16	upstream	UniRef100_B5CU85	99	Uncharacterized protein	-105	undefined	undefined	-	DUF4450	AAQ_g67753_17	upstream	UniRef100_A0A3C0E4X2	99.4	Beta-galactosidase	-86	undefined	undefined	ko:K12308	Glyco_hydro_42,Glyco_hydro_42C,Glyco_hydro_42M
40	AAQ_2	AAQ_2_27	AAQ	k77_309731	25214	sub_A	2	no_sweep	0	AAQ_g25707_21	downstream	UniRef100_A0A3E4ZB50	100	Chloramphenicol acetyltransferase	657	undefined	undefined	ko:K19271	CAT	AAQ_g25707_22	upstream	UniRef100_A0A1Q6GIQ1	97.2	OmpR/PhoB-type domain-containing protein	-214	undefined	undefined	-	Trans_reg_C
40	AAQ_2	AAQ_2_28	AAQ	k77_185173	4199	sub_C	2	no_sweep	0	AAQ_g26266_4	in	UniRef100_A0A1Q6GIC8	97	DNA protecting protein DprA	656	syn	R->R	ko:K04096	DNA_processg_A,HHH_5	-	-	-	-	-	-	-	-
40	AAQ_2	AAQ_2_29	AAQ	k77_397563	52476	sub_G	6	no_sweep	0	AAQ_g23850_32	in	UniRef100_A0A1Q6GNF8	99.5	MATE family efflux transporter	11	syn	S->S	ko:K03327	MatE	-	-	-	-	-	-	-	-
40	AAQ_2	AAQ_2_30	AAQ	k77_112170	123199	sub_G	6	no_sweep	0	AAQ_g34552_116	in	UniRef100_B5CWK8	96	ATPase, AAA family	1072	non_syn	Li->P	ko:K06413	AAA	-	-	-	-	-	-	-	-
40	AAQ_2	AAQ_2_31	AAQ	k77_145528	1000	sub_A	6	no_sweep	0	AAQ_g85539_1	in	UniRef100_B5D414	98.5	SASA domain-containing protein	546	non_syn	A->S	ko:K05970	SASA	-	-	-	-	-	-	-	-
40	AAQ_2	AAQ_2_32	AAQ	k77_147105	69173	del_1	6	no_sweep	0	AAQ_g8107_50	upstream	UniRef100_B5CXZ4	100	2-isopropylmalate synthase	-30	undefined	undefined	ko:K01649	HMGL-like,LeuA_dimer	AAQ_g8107_51	downstream	UniRef100_B5CXZ3	100	Nicotinate phosphoribosyltransferase	1453	undefined	undefined	ko:K00763	NAPRTase
40	AAQ_2	AAQ_2_33	AAQ	k77_185173	44110	sub_G	6	no_sweep	0	AAQ_g26266_33	in	UniRef100_A0A3C0E7U1	98.8	Glycoside hydrolase	1078	non_syn	K->R	ko:K12373	Glyco_hydro_20,Glyco_hydro_20b,Laminin_G_3	-	-	-	-	-	-	-	-
40	AAQ_2	AAQ_2_34	AAQ	k77_218313	15862	sub_T	6	no_sweep	0	AAQ_g83427_12	in	UniRef100_A0A414FHY0	97.2	Beta-xylosidase	1638	non_syn	H->Y	-	Glyco_hydro_43	-	-	-	-	-	-	-	-
41	AAQ_4	AAQ_4_1	AAQ	k77_430795	26240	sub_A	4	no_sweep	0	AAQ_g79920_23	in	UniRef100_A0A4R4GZX8	100	DNA-binding protein	165	non_syn	A->T	-	-	-	-	-	-	-	-	-	-
41	AAQ_4	AAQ_4_2	AAQ	k77_371288	120890	sub_C	4	no_sweep	0	AAQ_g66318_82	in	UniRef100_A0A412FCG9	97.8	Type IA DNA topoisomerase	233	syn	A->A	ko:K03169	Topoisom_bac,Toprim,Toprim_Crpt	-	-	-	-	-	-	-	-
41	AAQ_4	AAQ_4_3	AAQ	k77_371288	128549	sub_C	4	no_sweep	0	AAQ_g66318_89	in	UniRef100_A0A3A5WFH7	97.684	ParA family protein	188	non_syn	Vi->V	ko:K03496	AAA_31,CbiA,ParA	-	-	-	-	-	-	-	-
41	AAQ_4	AAQ_4_4	AAQ	k77_371288	137649	sub_G	4	no_sweep	0	AAQ_g66318_99	in	UniRef100_A0A3A9BFS7	99.7	Conjugative transposon protein TraN	179	non_syn	V->Vi	-	DUF4138	-	-	-	-	-	-	-	-
42	AAQ_5	AAQ_5_1	AAQ	k77_294000	267	sub_T	201	sweep	553	AAQ_g10087_1	in	UniRef100_A0A417R5B1	47.985	DNA gyrase subunit A	266	syn	T->T	ko:K02469	DNA_gyraseA_C,DNA_topoisoIV	-	-	-	-	-	-	-	-
42	AAQ_5	AAQ_5_2	AAQ	k77_121807	7198	sub_T	201	sweep	0	AAQ_g63224_4	upstream	UniRef100_A0A417QZX9	100	MATE family efflux transporter	-243	undefined	undefined	-	MatE	-	-	-	-	-	-	-	-
42	AAQ_5	AAQ_5_3	AAQ	k77_154673	30142	sub_A	201	sweep	0	AAQ_g11719_33	in	UniRef100_A0A373VFR8	99.7	Nitrogenase molybdenum-iron protein	804	syn	Li->Li	-	Oxidored_nitro	-	-	-	-	-	-	-	-
42	AAQ_5	AAQ_5_4	AAQ	k77_162294	7532	sub_G	201	sweep	0	AAQ_g16383_8	in	UniRef100_A0A417R7I6	100	Uridylate kinase	281	syn	Ii->Ii	ko:K09903	AA_kinase	-	-	-	-	-	-	-	-
42	AAQ_5	AAQ_5_5	AAQ	k77_1685	1897	sub_C	201	sweep	0	AAQ_g20762_2	in	UniRef100_A0A373VQQ9	99.2	Alanyl-tRNA editing protein	235	non_syn	A->V	ko:K01872	DHHA1,tRNA-synt_2c,tRNA_SAD	-	-	-	-	-	-	-	-
42	AAQ_5	AAQ_5_6	AAQ	k77_173760	4180	sub_A	201	sweep	0	AAQ_g73105_2	in	UniRef100_A0A417R639	99.7	FMN-binding protein	1640	non_syn	E->D	-	FMN_bind,Fer4_5	-	-	-	-	-	-	-	-
42	AAQ_5	AAQ_5_7	AAQ	k77_183365	3529	sub_A	201	sweep	0	AAQ_g1170_2	in	UniRef100_A0A373VRB6	99.5	GTPase HflX	221	syn	R->R	ko:K03665	GTP-bdg_M,GTP-bdg_N,MMR_HSR1	-	-	-	-	-	-	-	-
42	AAQ_5	AAQ_5_8	AAQ	k77_192607	3209	sub_G	201	sweep	0	AAQ_g27689_4	upstream	UniRef100_A0A417QSP1	100	SpoIID/LytB domain protein	-129	undefined	undefined	ko:K06381	SpoIID	AAQ_g27689_5	upstream	UniRef100_A0A373V4U3	100	Metallophosphoesterase	-29	undefined	undefined	ko:K07098	Metallophos
42	AAQ_5	AAQ_5_9	AAQ	k77_210300	10632	sub_T	201	sweep	0	AAQ_g71334_10	in	UniRef100_A0A417QX99	100	ABC transporter permease	56	syn	Y->Y	ko:K02072	BPD_transp_1	-	-	-	-	-	-	-	-
42	AAQ_5	AAQ_5_10	AAQ	k77_210300	10638	sub_A	201	sweep	0	AAQ_g71334_10	in	UniRef100_A0A417QX99	100	ABC transporter permease	62	syn	T->T	ko:K02072	BPD_transp_1	-	-	-	-	-	-	-	-
42	AAQ_5	AAQ_5_11	AAQ	k77_213513	25004	sub_C	201	sweep	0	AAQ_g13020_20	in	UniRef100_A0A373VQU8	100	DUF2029 domain-containing protein	281	syn	Y->Y	-	-	-	-	-	-	-	-	-	-
42	AAQ_5	AAQ_5_12	AAQ	k77_213513	25007	sub_G	201	sweep	0	AAQ_g13020_20	in	UniRef100_A0A373VQU8	100	DUF2029 domain-containing protein	284	syn	A->A	-	-	-	-	-	-	-	-	-	-
42	AAQ_5	AAQ_5_13	AAQ	k77_23023	4939	sub_A	201	sweep	0	AAQ_g16165_6	in	UniRef100_A0A417R098	100	MFS transporter	1171	non_syn	Ii->T	-	MFS_1_like	-	-	-	-	-	-	-	-
42	AAQ_5	AAQ_5_14	AAQ	k77_23023	4941	sub_C	201	sweep	0	AAQ_g16165_6	in	UniRef100_A0A417R098	100	MFS transporter	1169	syn	R->R	-	MFS_1_like	-	-	-	-	-	-	-	-
42	AAQ_5	AAQ_5_15	AAQ	k77_307940	9317	sub_G	201	sweep	0	AAQ_g99489_11	in	UniRef100_A0A373VJ10	99.7	Uncharacterized protein	1334	non_syn	Li->L	-	PMT_2	-	-	-	-	-	-	-	-
42	AAQ_5	AAQ_5_16	AAQ	k77_307940	9335	sub_G	201	sweep	0	AAQ_g99489_11	in	UniRef100_A0A373VJ10	99.7	Uncharacterized protein	1352	non_syn	Li->L	-	PMT_2	-	-	-	-	-	-	-	-
42	AAQ_5	AAQ_5_17	AAQ	k77_316036	11488	sub_G	201	sweep	0	AAQ_g11046_13	in	UniRef100_A0A373VQR3	98.663	Heavy metal translocating P-type ATPase	1358	syn	S->S	ko:K01533,ko:K17686	E1-E2_ATPase,HMA,Hydrolase	-	-	-	-	-	-	-	-
42	AAQ_5	AAQ_5_18	AAQ	k77_316036	28056	sub_G	201	sweep	0	AAQ_g11046_27	in	UniRef100_A0A373VNZ0	99.6	ABC transporter substrate-binding protein	1019	syn	K->K	ko:K02035	SBP_bac_5	-	-	-	-	-	-	-	-
42	AAQ_5	AAQ_5_19	AAQ	k77_316036	38079	sub_T	201	sweep	0	AAQ_g11046_42	in	UniRef100_A0A373VNX8	65.072	3-oxoacyl-[acyl-carrier-protein] reductase	224	syn	A->A	ko:K00059	adh_short_C2	-	-	-	-	-	-	-	-
42	AAQ_5	AAQ_5_20	AAQ	k77_32981	1899	sub_T	201	sweep	0	AAQ_g56160_3	in	UniRef100_A0A417R4W8	100	DNA-binding response regulator	45	syn	Li->Li	-	Response_reg,Trans_reg_C	-	-	-	-	-	-	-	-
42	AAQ_5	AAQ_5_21	AAQ	k77_335890	3611	sub_T	201	sweep	0	AAQ_g78286_3	in	UniRef100_A0A373VRV7	99.8	Uncharacterized protein	1032	syn	Li->Li	ko:K21012	PelG	-	-	-	-	-	-	-	-
42	AAQ_5	AAQ_5_22	AAQ	k77_36545	15301	sub_C	201	sweep	0	AAQ_g102069_14	in	UniRef100_A0A417R2I9	76.377	Transporter	125	syn	T->T	-	EamA	-	-	-	-	-	-	-	-
42	AAQ_5	AAQ_5_23	AAQ	k77_36545	15307	sub_T	201	sweep	0	AAQ_g102069_14	in	UniRef100_A0A417R2I9	76.377	Transporter	131	syn	A->A	-	EamA	-	-	-	-	-	-	-	-
42	AAQ_5	AAQ_5_24	AAQ	k77_375909	11690	sub_G	201	sweep	0	AAQ_g27781_8	in	UniRef100_A0A417R4U2	100	DNA-binding response regulator	512	syn	K->K	ko:K07705	LytTR,Response_reg	-	-	-	-	-	-	-	-
42	AAQ_5	AAQ_5_25	AAQ	k77_379303	6726	sub_G	201	sweep	0	AAQ_g72654_6	in	UniRef100_A0A417R691	100	Aspartokinase	587	syn	Y->Y	ko:K00928	AA_kinase,ACT,ACT_7	-	-	-	-	-	-	-	-
42	AAQ_5	AAQ_5_26	AAQ	k77_379928	4466	sub_G	201	sweep	0	AAQ_g80510_5	in	UniRef100_A0A417QXT0	97.442	Lactaldehyde reductase	1067	syn	E->E	ko:K00048	Fe-ADH	-	-	-	-	-	-	-	-
42	AAQ_5	AAQ_5_27	AAQ	k77_383210	3733	sub_A	201	sweep	0	AAQ_g29139_4	in	UniRef100_A0A417R0Z5	100	Recombination protein RecR	341	syn	P->P	ko:K06187	HHH,RecR,Toprim_4	-	-	-	-	-	-	-	-
42	AAQ_5	AAQ_5_28	AAQ	k77_383210	3808	sub_T	201	sweep	0	AAQ_g29139_4	in	UniRef100_A0A417R0Z5	100	Recombination protein RecR	416	syn	V->V	ko:K06187	HHH,RecR,Toprim_4	-	-	-	-	-	-	-	-
42	AAQ_5	AAQ_5_29	AAQ	k77_383210	3829	sub_T	201	sweep	0	AAQ_g29139_4	in	UniRef100_A0A417R0Z5	100	Recombination protein RecR	437	syn	S->S	ko:K06187	HHH,RecR,Toprim_4	-	-	-	-	-	-	-	-
42	AAQ_5	AAQ_5_30	AAQ	k77_383210	9719	sub_C	201	sweep	0	AAQ_g29139_10	upstream	UniRef100_A0A417R559	100	Ribonuclease P protein component	-671	undefined	undefined	ko:K03536	Ribonuclease_P	AAQ_g29139_11	upstream	UniRef100_A0A417R554	99.8	Chromosomal replication initiator protein DnaA	-142	undefined	undefined	ko:K02313	Bac_DnaA,Bac_DnaA_C,DnaA_N
42	AAQ_5	AAQ_5_31	AAQ	k77_390874	14599	sub_A	201	sweep	0	AAQ_g34800_16	upstream	UniRef100_A0A417QZ02	99.7	Glucose-1-phosphate adenylyltransferase	-153	undefined	undefined	ko:K00975	Hexapep,NTP_transferase	AAQ_g34800_17	upstream	UniRef100_A0A373VNW9	100	Sugar transferase	-201	undefined	undefined	-	Bac_transf
42	AAQ_5	AAQ_5_32	AAQ	k77_390874	14627	sub_T	201	sweep	0	AAQ_g34800_16	upstream	UniRef100_A0A417QZ02	99.7	Glucose-1-phosphate adenylyltransferase	-181	undefined	undefined	ko:K00975	Hexapep,NTP_transferase	AAQ_g34800_17	upstream	UniRef100_A0A373VNW9	100	Sugar transferase	-173	undefined	undefined	-	Bac_transf
42	AAQ_5	AAQ_5_33	AAQ	k77_390874	15117	sub_C	201	sweep	0	AAQ_g34800_17	in	UniRef100_A0A373VNW9	100	Sugar transferase	317	syn	Ii->Ii	-	Bac_transf	-	-	-	-	-	-	-	-
42	AAQ_5	AAQ_5_34	AAQ	k77_390874	15132	sub_A	201	sweep	0	AAQ_g34800_17	in	UniRef100_A0A373VNW9	100	Sugar transferase	332	syn	R->R	-	Bac_transf	-	-	-	-	-	-	-	-
42	AAQ_5	AAQ_5_35	AAQ	k77_438078	9929	sub_A	201	sweep	0	AAQ_g76989_13	in	UniRef100_A0A417QW06	100	V-type ATP synthase beta chain	923	syn	P->P	ko:K02118	ATP-synt_ab,ATP-synt_ab_N	-	-	-	-	-	-	-	-
42	AAQ_5	AAQ_5_36	AAQ	k77_438078	9938	sub_C	201	sweep	0	AAQ_g76989_13	in	UniRef100_A0A417QW06	100	V-type ATP synthase beta chain	932	syn	D->D	ko:K02118	ATP-synt_ab,ATP-synt_ab_N	-	-	-	-	-	-	-	-
42	AAQ_5	AAQ_5_37	AAQ	k77_447060	1162	sub_T	201	sweep	0	AAQ_g102945_1	upstream	UniRef100_A0A417R5C0	74.365	S-adenosylmethionine synthase	-283	undefined	undefined	ko:K00789	S-AdoMet_synt_C,S-AdoMet_synt_M,S-AdoMet_synt_N	AAQ_g102945_2	downstream	UniRef100_A0A417R544	100	UDP-N-acetylglucosamine 1-carboxyvinyltransferase	1298	undefined	undefined	ko:K00790	EPSP_synthase
42	AAQ_5	AAQ_5_38	AAQ	k77_69257	10135	sub_T	201	sweep	0	AAQ_g46615_10	in	UniRef100_A0A417QZP2	99.8	Spore germination protein	1220	syn	A->A	ko:K06310	GerA	-	-	-	-	-	-	-	-
42	AAQ_5	AAQ_5_39	AAQ	k77_69257	10147	sub_G	201	sweep	0	AAQ_g46615_10	in	UniRef100_A0A417QZP2	99.8	Spore germination protein	1232	syn	R->R	ko:K06310	GerA	-	-	-	-	-	-	-	-
42	AAQ_5	AAQ_5_40	AAQ	k77_73109	5989	sub_A	201	sweep	0	AAQ_g102112_7	in	UniRef100_A0A417R6Z2	100	Ion-translocating oxidoreductase complex subunit A	416	syn	A->A	ko:K03617	Rnf-Nqr	-	-	-	-	-	-	-	-
42	AAQ_5	AAQ_5_41	AAQ	k77_91079	17793	sub_A	201	sweep	0	AAQ_g46749_16	in	UniRef100_A0A373VS30	99.7	PAS domain-containing protein	848	syn	A->A	ko:K02688,ko:K21405	HTH_8,PAS,PrpR_N,Sigma54_activ_2,Sigma54_activat	-	-	-	-	-	-	-	-
42	AAQ_5	AAQ_5_42	AAQ	k77_103204	7439	sub_G	201	no_sweep	0	AAQ_g12049_10	in	UniRef100_A0A373VVS7	97.435	MATE family efflux transporter	329	syn	A->A	-	MatE	-	-	-	-	-	-	-	-
42	AAQ_5	AAQ_5_43	AAQ	k77_103204	7442	sub_A	201	no_sweep	0	AAQ_g12049_10	in	UniRef100_A0A373VVS7	97.435	MATE family efflux transporter	332	syn	G->G	-	MatE	-	-	-	-	-	-	-	-
42	AAQ_5	AAQ_5_44	AAQ	k77_173760	4997	sub_C	201	no_sweep	0	AAQ_g73105_4	in	UniRef100_A0A373VTT5	99.6	4Fe-4S binding protein	64	non_syn	A->Vi	-	Fer4_5	-	-	-	-	-	-	-	-
42	AAQ_5	AAQ_5_45	AAQ	k77_183365	2102	sub_G	201	no_sweep	0	AAQ_g1170_1	in	UniRef100_A0A417R4G8	97.302	Ribonucleoside triphosphate reductase	213	syn	Li->Li	ko:K21636	ATP-cone,NRDD	-	-	-	-	-	-	-	-
42	AAQ_5	AAQ_5_46	AAQ	k77_192607	4374	sub_G	201	no_sweep	0	AAQ_g27689_5	in	UniRef100_A0A373V4U3	100	Metallophosphoesterase	1136	syn	G->G	ko:K07098	Metallophos	-	-	-	-	-	-	-	-
42	AAQ_5	AAQ_5_47	AAQ	k77_197140	23712	ins_GA	201	no_sweep	0	AAQ_g94207_24	upstream	UniRef100_A0A417R4T5	100	Energy coupling factor transporter S component ThiW	-195	undefined	undefined	-	ThiW	AAQ_g94207_25	upstream	UniRef100_A0A417R4K9	100	UDP-N-acetylmuramoyl-L-alanyl-D-glutamate--2,6-diaminopimelate ligase	-157	undefined	undefined	ko:K01928	Mur_ligase,Mur_ligase_C,Mur_ligase_M
42	AAQ_5	AAQ_5_48	AAQ	k77_200727	967	sub_C	201	no_sweep	0	AAQ_g39933_1	in	UniRef100_A0A373VW37	94.949	Sodium/proline symporter	806	syn	P->P	ko:K11928	SSF	-	-	-	-	-	-	-	-
42	AAQ_5	AAQ_5_49	AAQ	k77_200727	973	sub_A	201	no_sweep	0	AAQ_g39933_1	in	UniRef100_A0A373VW37	94.949	Sodium/proline symporter	800	syn	A->A	ko:K11928	SSF	-	-	-	-	-	-	-	-
42	AAQ_5	AAQ_5_50	AAQ	k77_210300	7761	sub_G	201	no_sweep	0	AAQ_g71334_6	in	UniRef100_A0A373VGU8	100	tRNA-specific 2-thiouridylase MnmA	275	syn	L->L	ko:K00566	tRNA_Me_trans	-	-	-	-	-	-	-	-
42	AAQ_5	AAQ_5_51	AAQ	k77_213513	25064	sub_C	201	no_sweep	0	AAQ_g13020_20	in	UniRef100_A0A373VQU8	100	DUF2029 domain-containing protein	341	syn	N->N	-	-	-	-	-	-	-	-	-	-
42	AAQ_5	AAQ_5_52	AAQ	k77_23023	4917	ins_A	201	no_sweep	0	AAQ_g16165_5	downstream	UniRef100_A0A373VV13	87.142	Biotin transporter	699	undefined	undefined	ko:K03523	BioY	AAQ_g16165_6	downstream	UniRef100_A0A417R098	100	MFS transporter	1193	undefined	undefined	-	MFS_1_like
42	AAQ_5	AAQ_5_53	AAQ	k77_23517	6682	sub_C	201	no_sweep	0	AAQ_g22755_5	in	UniRef100_A0A417QXM7	99.3	NfeD family protein	288	syn	Li->Li	-	NfeD	-	-	-	-	-	-	-	-
42	AAQ_5	AAQ_5_54	AAQ	k77_249607	6828	sub_T	201	no_sweep	0	AAQ_g4794_12	in	UniRef100_A0A3E5A3J9	98.3	DNA-binding protein	879	syn	L->L	-	HTH_17	-	-	-	-	-	-	-	-
42	AAQ_5	AAQ_5_55	AAQ	k77_252468	14031	sub_A	201	no_sweep	0	AAQ_g54548_14	in	UniRef100_A0A417R4Q4	95.4	AraC family transcriptional regulator	135	non_syn	Ii->V	-	AraC_binding,HTH_18,HTH_AraC	-	-	-	-	-	-	-	-
42	AAQ_5	AAQ_5_56	AAQ	k77_303111	5767	sub_A	201	no_sweep	0	AAQ_g32080_6	in	UniRef100_R7DE20	75.657	YhgE/Pip domain protein	424	non_syn	Y->C	ko:K01421	ABC2_membrane_3,DUF3533	-	-	-	-	-	-	-	-
42	AAQ_5	AAQ_5_57	AAQ	k77_303111	6652	sub_G	201	no_sweep	0	AAQ_g32080_6	in	UniRef100_R7DE20	75.657	YhgE/Pip domain protein	1309	non_syn	R->H	ko:K01421	ABC2_membrane_3,DUF3533	-	-	-	-	-	-	-	-
42	AAQ_5	AAQ_5_58	AAQ	k77_308211	5006	sub_A	201	no_sweep	0	AAQ_g3150_6	in	UniRef100_A0A417QZL8	99.741	FAD-binding oxidoreductase	827	syn	V->V	ko:K00303	DAO	-	-	-	-	-	-	-	-
42	AAQ_5	AAQ_5_59	AAQ	k77_332769	4615	sub_A	201	no_sweep	0	AAQ_g37261_2	in	UniRef100_A0A417R8K1	99.8	Glutamate synthase subunit beta	689	syn	K->K	ko:K00266	Fer4_20,Pyr_redox_2	-	-	-	-	-	-	-	-
42	AAQ_5	AAQ_5_60	AAQ	k77_335890	2713	sub_T	201	no_sweep	0	AAQ_g78286_3	in	UniRef100_A0A373VRV7	99.8	Uncharacterized protein	134	syn	Ii->Ii	ko:K21012	PelG	-	-	-	-	-	-	-	-
42	AAQ_5	AAQ_5_61	AAQ	k77_348975	1030	del_1	201	no_sweep	0	AAQ_g65396_1	downstream	UniRef100_A0A417R759	72.304	Glutamate dehydrogenase	1028	undefined	undefined	ko:K00261,ko:K00262	ELFV_dehydrog,ELFV_dehydrog_N	AAQ_g65396_2	downstream	UniRef100_A0A417R7J2	100	RNA polymerase sigma factor	785	undefined	undefined	ko:K03091	Sigma70_r2,Sigma70_r3,Sigma70_r4
42	AAQ_5	AAQ_5_62	AAQ	k77_375909	11669	sub_G	201	no_sweep	0	AAQ_g27781_8	in	UniRef100_A0A417R4U2	100	DNA-binding response regulator	491	syn	T->T	ko:K07705	LytTR,Response_reg	-	-	-	-	-	-	-	-
42	AAQ_5	AAQ_5_63	AAQ	k77_380277	3290	sub_T	201	no_sweep	0	AAQ_g85818_3	in	UniRef100_A0A417R013	100	DNA-binding response regulator	596	syn	R->R	ko:K07658	Response_reg,Trans_reg_C	-	-	-	-	-	-	-	-
42	AAQ_5	AAQ_5_64	AAQ	k77_380277	6640	sub_C	201	no_sweep	0	AAQ_g85818_6	in	UniRef100_A0A373VST7	99.4	Adenine DNA glycosylase	490	non_syn	S->N	ko:K03575	EndIII_4Fe-2S,HhH-GPD,NUDIX_4,SfsA	-	-	-	-	-	-	-	-
42	AAQ_5	AAQ_5_65	AAQ	k77_380277	6668	sub_G	201	no_sweep	0	AAQ_g85818_6	in	UniRef100_A0A373VST7	99.4	Adenine DNA glycosylase	462	non_syn	Q->K	ko:K03575	EndIII_4Fe-2S,HhH-GPD,NUDIX_4,SfsA	-	-	-	-	-	-	-	-
42	AAQ_5	AAQ_5_66	AAQ	k77_380277	6675	sub_G	201	no_sweep	0	AAQ_g85818_6	in	UniRef100_A0A373VST7	99.4	Adenine DNA glycosylase	455	syn	D->D	ko:K03575	EndIII_4Fe-2S,HhH-GPD,NUDIX_4,SfsA	-	-	-	-	-	-	-	-
42	AAQ_5	AAQ_5_67	AAQ	k77_380277	6678	sub_G	201	no_sweep	0	AAQ_g85818_6	in	UniRef100_A0A373VST7	99.4	Adenine DNA glycosylase	452	syn	G->G	ko:K03575	EndIII_4Fe-2S,HhH-GPD,NUDIX_4,SfsA	-	-	-	-	-	-	-	-
42	AAQ_5	AAQ_5_68	AAQ	k77_380277	6681	sub_G	201	no_sweep	0	AAQ_g85818_6	in	UniRef100_A0A373VST7	99.4	Adenine DNA glycosylase	449	syn	D->D	ko:K03575	EndIII_4Fe-2S,HhH-GPD,NUDIX_4,SfsA	-	-	-	-	-	-	-	-
42	AAQ_5	AAQ_5_69	AAQ	k77_380277	6691	sub_G	201	no_sweep	0	AAQ_g85818_6	in	UniRef100_A0A373VST7	99.4	Adenine DNA glycosylase	439	non_syn	T->Ii	ko:K03575	EndIII_4Fe-2S,HhH-GPD,NUDIX_4,SfsA	-	-	-	-	-	-	-	-
42	AAQ_5	AAQ_5_70	AAQ	k77_380277	6693	sub_G	201	no_sweep	0	AAQ_g85818_6	in	UniRef100_A0A373VST7	99.4	Adenine DNA glycosylase	437	syn	Ii->Ii	ko:K03575	EndIII_4Fe-2S,HhH-GPD,NUDIX_4,SfsA	-	-	-	-	-	-	-	-
42	AAQ_5	AAQ_5_71	AAQ	k77_380277	6798	sub_A	201	no_sweep	0	AAQ_g85818_6	in	UniRef100_A0A373VST7	99.4	Adenine DNA glycosylase	332	syn	S->S	ko:K03575	EndIII_4Fe-2S,HhH-GPD,NUDIX_4,SfsA	-	-	-	-	-	-	-	-
42	AAQ_5	AAQ_5_72	AAQ	k77_383210	5007	sub_T	201	no_sweep	0	AAQ_g29139_5	in	UniRef100_A0A373VSJ8	100	LacI family transcriptional regulator	980	syn	T->T	ko:K02529	LacI,Peripla_BP_1,Peripla_BP_3	-	-	-	-	-	-	-	-
42	AAQ_5	AAQ_5_73	AAQ	k77_390874	15144	sub_C	201	no_sweep	0	AAQ_g34800_17	in	UniRef100_A0A373VNW9	100	Sugar transferase	344	syn	D->D	-	Bac_transf	-	-	-	-	-	-	-	-
42	AAQ_5	AAQ_5_74	AAQ	k77_390874	15153	sub_G	201	no_sweep	0	AAQ_g34800_17	in	UniRef100_A0A373VNW9	100	Sugar transferase	353	syn	P->P	-	Bac_transf	-	-	-	-	-	-	-	-
42	AAQ_5	AAQ_5_75	AAQ	k77_403869	5534	sub_A	201	no_sweep	0	AAQ_g8932_6	in	UniRef100_A0A373VQF6	100	CvpA family protein	341	syn	A->A	-	Colicin_V	-	-	-	-	-	-	-	-
42	AAQ_5	AAQ_5_76	AAQ	k77_403869	5548	sub_G	201	no_sweep	0	AAQ_g8932_6	in	UniRef100_A0A373VQF6	100	CvpA family protein	355	non_syn	D->G	-	Colicin_V	-	-	-	-	-	-	-	-
42	AAQ_5	AAQ_5_77	AAQ	k77_431218	22650	sub_G	201	no_sweep	0	AAQ_g85074_18	in	UniRef100_A0A417RA60	99.7	DNA helicase	1913	syn	T->T	ko:K03657	AAA_19,UvrD-helicase,UvrD_C,UvrD_C_2	-	-	-	-	-	-	-	-
42	AAQ_5	AAQ_5_78	AAQ	k77_438078	4270	sub_C	201	no_sweep	0	AAQ_g76989_8	in	UniRef100_A0A417QW75	99.381	V-type ATP synthase subunit I	371	syn	D->D	ko:K02123	V_ATPase_I	-	-	-	-	-	-	-	-
42	AAQ_5	AAQ_5_79	AAQ	k77_69066	3438	sub_G	201	no_sweep	0	AAQ_g44284_3	in	UniRef100_A0A417R049	99.3	Homoserine dehydrogenase	311	syn	S->S	ko:K00003	ACT,Homoserine_dh,NAD_binding_3	-	-	-	-	-	-	-	-
42	AAQ_5	AAQ_5_80	AAQ	k77_81497	1704	sub_G	201	no_sweep	0	AAQ_g12904_3	in	UniRef100_A0A417RAH8	100	Protein translocase subunit SecY	950	syn	Y->Y	ko:K03076	SecY	-	-	-	-	-	-	-	-
42	AAQ_5	AAQ_5_81	AAQ	k77_91079	13615	sub_A	201	no_sweep	0	AAQ_g46749_13	in	UniRef100_A0A417QYH9	99.7	ATP-binding cassette domain-containing protein	236	syn	G->G	ko:K02032	ABC_tran,oligo_HPY	-	-	-	-	-	-	-	-
42	AAQ_5	AAQ_5_82	AAQ	k77_128346	552	sub_T	201	sweep	0	AAQ_g56557_1	in	UniRef100_A0A417R1W9	82.285	GMP synthase [glutamine-hydrolyzing]	746	non_syn	V->Vi	ko:K01951	GATase,GMP_synt_C,NAD_synthase,tRNA_Me_trans	-	-	-	-	-	-	-	-
42	AAQ_5	AAQ_5_83	AAQ	k77_128346	576	sub_A	201	sweep	0	AAQ_g56557_1	in	UniRef100_A0A417R1W9	82.285	GMP synthase [glutamine-hydrolyzing]	722	syn	G->G	ko:K01951	GATase,GMP_synt_C,NAD_synthase,tRNA_Me_trans	-	-	-	-	-	-	-	-
42	AAQ_5	AAQ_5_84	AAQ	k77_128346	582	sub_T	201	sweep	0	AAQ_g56557_1	in	UniRef100_A0A417R1W9	82.285	GMP synthase [glutamine-hydrolyzing]	716	syn	A->A	ko:K01951	GATase,GMP_synt_C,NAD_synthase,tRNA_Me_trans	-	-	-	-	-	-	-	-
42	AAQ_5	AAQ_5_85	AAQ	k77_138401	2694	sub_A	201	sweep	0	AAQ_g90088_5	in	UniRef100_A0A417R6T3	100	Exodeoxyribonuclease III	410	syn	K->K	ko:K01142	Exo_endo_phos	-	-	-	-	-	-	-	-
42	AAQ_5	AAQ_5_86	AAQ	k77_154673	28067	sub_T	201	sweep	0	AAQ_g11719_32	in	UniRef100_A0A417R4K3	100	Carbamoyltransferase	1754	syn	K->K	ko:K04656	Acylphosphatase,Sua5_yciO_yrdC,zf-HYPF	-	-	-	-	-	-	-	-
42	AAQ_5	AAQ_5_87	AAQ	k77_155473	518	sub_T	201	sweep	0	AAQ_g24632_2	in	UniRef100_A0A373VHJ4	98.3	Cysteine hydrolase	246	syn	Li->Li	-	Isochorismatase	-	-	-	-	-	-	-	-
42	AAQ_5	AAQ_5_88	AAQ	k77_155473	539	sub_G	201	sweep	0	AAQ_g24632_2	in	UniRef100_A0A373VHJ4	98.3	Cysteine hydrolase	267	non_syn	D->N	-	Isochorismatase	-	-	-	-	-	-	-	-
42	AAQ_5	AAQ_5_89	AAQ	k77_167620	7336	sub_G	201	sweep	0	AAQ_g86005_10	in	UniRef100_A0A417RAC6	100	SpoVA/SpoVAEb family sporulation membrane protein	344	syn	G->G	ko:K06405	SpoVAC_SpoVAEB	-	-	-	-	-	-	-	-
42	AAQ_5	AAQ_5_90	AAQ	k77_1924	1769	sub_T	201	sweep	0	AAQ_g23820_3	in	UniRef100_A0A417QT07	99.416	Phospho-2-dehydro-3-deoxyheptonate aldolase	629	syn	E->E	ko:K01626	DAHP_synth_1	-	-	-	-	-	-	-	-
42	AAQ_5	AAQ_5_91	AAQ	k77_192607	1166	sub_T	201	sweep	0	AAQ_g27689_2	upstream	UniRef100_A0A417QSH1	100	GIY-YIG nuclease family protein	-38	undefined	undefined	ko:K07461	GIY-YIG	AAQ_g27689_3	downstream	UniRef100_A0A417QSL7	98.6	M23 family peptidase	971	undefined	undefined	-	Peptidase_M23
42	AAQ_5	AAQ_5_92	AAQ	k77_192607	1172	sub_A:ins_A	201	sweep	0	AAQ_g27689_2	upstream	UniRef100_A0A417QSH1	100	GIY-YIG nuclease family protein	-44	undefined	undefined	ko:K07461	GIY-YIG	AAQ_g27689_3	downstream	UniRef100_A0A417QSL7	98.6	M23 family peptidase	965	undefined	undefined	-	Peptidase_M23
42	AAQ_5	AAQ_5_93	AAQ	k77_192607	1176	sub_C	201	sweep	0	AAQ_g27689_2	upstream	UniRef100_A0A417QSH1	100	GIY-YIG nuclease family protein	-48	undefined	undefined	ko:K07461	GIY-YIG	AAQ_g27689_3	downstream	UniRef100_A0A417QSL7	98.6	M23 family peptidase	961	undefined	undefined	-	Peptidase_M23
42	AAQ_5	AAQ_5_94	AAQ	k77_197140	17680	sub_A	201	sweep	0	AAQ_g94207_19	in	UniRef100_A0A417R4N6	100	D-lyxose/D-mannose family sugar isomerase	52	non_syn	K->R	ko:K09988	Lyx_isomer	-	-	-	-	-	-	-	-
42	AAQ_5	AAQ_5_95	AAQ	k77_23517	6117	sub_G	201	sweep	0	AAQ_g22755_4	in	UniRef100_A0A373VME8	99.2	RNA methyltransferase	535	non_syn	R->Q	ko:K03437	SpoU_methylase,SpoU_sub_bind	-	-	-	-	-	-	-	-
42	AAQ_5	AAQ_5_96	AAQ	k77_23517	6118	sub_A	201	sweep	0	AAQ_g22755_4	in	UniRef100_A0A373VME8	99.2	RNA methyltransferase	536	syn	Q->Q	ko:K03437	SpoU_methylase,SpoU_sub_bind	-	-	-	-	-	-	-	-
42	AAQ_5	AAQ_5_97	AAQ	k77_23517	6169	sub_C	201	sweep	0	AAQ_g22755_4	in	UniRef100_A0A373VME8	99.2	RNA methyltransferase	587	syn	Y->Y	ko:K03437	SpoU_methylase,SpoU_sub_bind	-	-	-	-	-	-	-	-
42	AAQ_5	AAQ_5_98	AAQ	k77_252468	19509	ins_G	201	sweep	0	AAQ_g54548_18	downstream	UniRef100_A0A417R4I0	99.5	N-acetylmuramoyl-L-alanine amidase	1819	undefined	undefined	ko:K01448	Amidase_3	AAQ_g54548_19	downstream	UniRef100_A0A417R4R2	100	TrpR YerC/YecD	394	undefined	undefined	-	Trp_repressor
42	AAQ_5	AAQ_5_99	AAQ	k77_259636	356	sub_A	201	sweep	0	AAQ_g42064_1	in	UniRef100_A0A417RB19	97.381	ATP-dependent zinc metalloprotease FtsH	1589	syn	D->D	ko:K03798	AAA,FtsH_ext,Peptidase_M41	-	-	-	-	-	-	-	-
42	AAQ_5	AAQ_5_100	AAQ	k77_267087	9137	sub_T	201	sweep	0	AAQ_g54657_8	in	UniRef100_A0A417R3T5	99.9	Multifunctional fusion protein	1215	non_syn	Ii->V	ko:K03072,ko:K12257	SecD_SecF,Sec_GG	-	-	-	-	-	-	-	-
42	AAQ_5	AAQ_5_101	AAQ	k77_280463	2596	sub_T	201	sweep	0	AAQ_g27164_4	in	UniRef100_A0A373VST1	100	Exodeoxyribonuclease 7 large subunit	356	syn	E->E	ko:K03601	Exonuc_VII_L,tRNA_anti_2	-	-	-	-	-	-	-	-
42	AAQ_5	AAQ_5_102	AAQ	k77_282571	8865	sub_T	201	sweep	0	AAQ_g56064_7	in	UniRef100_A0A417R078	99.4	Peptidase U32	205	non_syn	Q->R	-	Peptidase_U32	-	-	-	-	-	-	-	-
42	AAQ_5	AAQ_5_103	AAQ	k77_316036	9673	sub_T	201	sweep	0	AAQ_g11046_12	in	UniRef100_A0A417QYG3	100	Chloride channel protein	530	syn	A->A	ko:K03281	Voltage_CLC	-	-	-	-	-	-	-	-
42	AAQ_5	AAQ_5_104	AAQ	k77_316036	9685	sub_A	201	sweep	0	AAQ_g11046_12	in	UniRef100_A0A417QYG3	100	Chloride channel protein	518	syn	G->G	ko:K03281	Voltage_CLC	-	-	-	-	-	-	-	-
42	AAQ_5	AAQ_5_105	AAQ	k77_32981	4181	sub_A	201	sweep	0	AAQ_g56160_5	in	UniRef100_A0A417R5B5	100	Guanylate kinase	162	non_syn	N->D	ko:K00942	Guanylate_kin	-	-	-	-	-	-	-	-
42	AAQ_5	AAQ_5_106	AAQ	k77_32981	6920	sub_C	201	sweep	0	AAQ_g56160_8	in	UniRef100_A0A417R532	100	tRNA1(Val) (Adenine(37)-N6)-methyltransferase	338	syn	A->A	ko:K15460	MTS,Methyltransf_31	-	-	-	-	-	-	-	-
42	AAQ_5	AAQ_5_107	AAQ	k77_359988	693	sub_G	201	sweep	0	AAQ_g10287_1	in	UniRef100_A0A417QYD0	99.4	Phosphoesterase	359	syn	G->G	ko:K07095	Metallophos_2	-	-	-	-	-	-	-	-
42	AAQ_5	AAQ_5_108	AAQ	k77_359988	9734	sub_G	201	sweep	0	AAQ_g10287_11	in	UniRef100_A0A417QYH6	100	Glycogen debranching enzyme	671	syn	T->T	ko:K01214	Alpha-amylase,CBM_48	-	-	-	-	-	-	-	-
42	AAQ_5	AAQ_5_109	AAQ	k77_359988	13337	sub_G	201	sweep	0	AAQ_g10287_13	in	UniRef100_A0A417QYC2	100	ATPase	302	syn	D->D	-	FGGY_C,FGGY_N	-	-	-	-	-	-	-	-
42	AAQ_5	AAQ_5_110	AAQ	k77_374388	772	sub_C	201	sweep	0	AAQ_g6160_1	in	UniRef100_A0A417QYT3	100	Ferrous iron transport protein B	581	syn	V->V	ko:K04759	FeoA,FeoB_C,FeoB_N,Gate	-	-	-	-	-	-	-	-
42	AAQ_5	AAQ_5_111	AAQ	k77_379303	11824	sub_A	201	sweep	0	AAQ_g72654_11	in	UniRef100_A0A417R663	90.058	MBL fold metallo-hydrolase	10	non_syn	L->P	ko:K00784	Lactamase_B_2	-	-	-	-	-	-	-	-
42	AAQ_5	AAQ_5_112	AAQ	k77_435582	3673	sub_A	201	sweep	0	AAQ_g40882_5	in	UniRef100_A0A373V949	73.813	Uncharacterized protein	1621	non_syn	F->S	-	Aldo_ket_red	-	-	-	-	-	-	-	-
42	AAQ_5	AAQ_5_113	AAQ	k77_438078	7700	sub_A	201	sweep	0	AAQ_g76989_12	in	UniRef100_A0A417QW73	99.8	V-type ATP synthase alpha chain	480	non_syn	Ii->V	ko:K02117	ATP-synt_ab,ATP-synt_ab_N,ATP-synt_ab_Xtn	-	-	-	-	-	-	-	-
42	AAQ_5	AAQ_5_114	AAQ	k77_438078	7703	sub_A	201	sweep	0	AAQ_g76989_12	in	UniRef100_A0A417QW73	99.8	V-type ATP synthase alpha chain	483	non_syn	S->R	ko:K02117	ATP-synt_ab,ATP-synt_ab_N,ATP-synt_ab_Xtn	-	-	-	-	-	-	-	-
42	AAQ_5	AAQ_5_115	AAQ	k77_438078	7705	sub_A	201	sweep	0	AAQ_g76989_12	in	UniRef100_A0A417QW73	99.8	V-type ATP synthase alpha chain	485	syn	R->R	ko:K02117	ATP-synt_ab,ATP-synt_ab_N,ATP-synt_ab_Xtn	-	-	-	-	-	-	-	-
42	AAQ_5	AAQ_5_116	AAQ	k77_447060	4379	sub_G	201	sweep	0	AAQ_g102945_5	in	UniRef100_A0A417R5F2	100	Putative manganese-dependent inorganic diphosphatase	1119	non_syn	P->S	ko:K15986	CBS,DHH,DHHA2,DRTGG	-	-	-	-	-	-	-	-
42	AAQ_5	AAQ_5_117	AAQ	k77_447060	5332	sub_T	201	sweep	0	AAQ_g102945_5	in	UniRef100_A0A417R5F2	100	Putative manganese-dependent inorganic diphosphatase	166	non_syn	N->S	ko:K15986	CBS,DHH,DHHA2,DRTGG	-	-	-	-	-	-	-	-
42	AAQ_5	AAQ_5_118	AAQ	k77_447060	5349	sub_T	201	sweep	0	AAQ_g102945_5	in	UniRef100_A0A417R5F2	100	Putative manganese-dependent inorganic diphosphatase	149	syn	E->E	ko:K15986	CBS,DHH,DHHA2,DRTGG	-	-	-	-	-	-	-	-
42	AAQ_5	AAQ_5_119	AAQ	k77_453099	1666	sub_C	201	sweep	0	AAQ_g85217_2	in	UniRef100_A0A373VPH3	99.8	LL-diaminopimelate aminotransferase	102	non_syn	Q->E	-	Aminotran_1_2	-	-	-	-	-	-	-	-
42	AAQ_5	AAQ_5_120	AAQ	k77_453664	1432	sub_T	201	sweep	0	AAQ_g93614_1	in	UniRef100_A0A417R076	71.682	Beta-glucosidase	377	syn	A->A	-	Fn3-like,Glyco_hydro_3,Glyco_hydro_3_C	-	-	-	-	-	-	-	-
42	AAQ_5	AAQ_5_121	AAQ	k77_464681	13000	sub_T	201	sweep	0	AAQ_g39275_11	upstream	UniRef100_A0A373VIQ3	99.6	Nickel pincer cofactor biosynthesis protein LarB	-7	undefined	undefined	ko:K06898	AIRC	AAQ_g39275_12	downstream	UniRef100_A0A373VKP5	98.526	Uncharacterized protein	644	undefined	undefined	-	-
42	AAQ_5	AAQ_5_122	AAQ	k77_69257	12142	sub_C	201	sweep	0	AAQ_g46615_11	downstream	UniRef100_A0A417QZ54	99.5	Spore gernimation protein	1677	undefined	undefined	-	Spore_permease	AAQ_g46615_12	upstream	UniRef100_A0A417QZA3	100	Uncharacterized protein	-53	undefined	undefined	-	-
42	AAQ_5	AAQ_5_123	AAQ	k77_94516	13118	sub_C	201	sweep	0	AAQ_g95348_12	in	UniRef100_A0A417R618	99.9	PTS glucose transporter subunit IIA	1580	syn	T->T	ko:K20116,ko:K20117,ko:K20118	PTS_EIIA_1,PTS_EIIB,PTS_EIIC	-	-	-	-	-	-	-	-
42	AAQ_5	AAQ_5_124	AAQ	k77_96192	15178	sub_T	201	sweep	0	AAQ_g11605_13	in	UniRef100_A0A417R864	100	Biotin synthase	181	non_syn	K->R	ko:K01012	BATS,Radical_SAM	-	-	-	-	-	-	-	-
42	AAQ_5	AAQ_5_125	AAQ	k77_98100	3312	sub_T	201	sweep	0	AAQ_g42476_5	in	UniRef100_A0A417QZG1	100	Uncharacterized protein	27	non_syn	Mi->Li	-	-	-	-	-	-	-	-	-	-
42	AAQ_5	AAQ_5_126	AAQ	k77_98100	3328	sub_A	201	sweep	0	AAQ_g42476_5	in	UniRef100_A0A417QZG1	100	Uncharacterized protein	11	syn	S->S	-	-	-	-	-	-	-	-	-	-
42	AAQ_5	AAQ_5_127	AAQ	k77_431218	571	sub_C	201	no_sweep	83	AAQ_g85074_1	in	UniRef100_UPI001367BC53	30.645	valine--tRNA ligase	260	syn	A->A	ko:K01873	Anticodon_1,Val_tRNA-synt_C,tRNA-synt_1	-	-	-	-	-	-	-	-
42	AAQ_5	AAQ_5_128	AAQ	k77_431218	577	sub_G	201	no_sweep	81	AAQ_g85074_1	in	UniRef100_UPI001367BC53	30.645	valine--tRNA ligase	254	syn	H->H	ko:K01873	Anticodon_1,Val_tRNA-synt_C,tRNA-synt_1	-	-	-	-	-	-	-	-
42	AAQ_5	AAQ_5_129	AAQ	k77_103204	10251	sub_G	201	no_sweep	0	AAQ_g12049_12	in	UniRef100_A0A417R7M5	98.622	Nitronate monooxygenase	539	syn	G->G	-	NMO	-	-	-	-	-	-	-	-
42	AAQ_5	AAQ_5_130	AAQ	k77_128346	555	sub_A	201	no_sweep	0	AAQ_g56557_1	in	UniRef100_A0A417R1W9	82.285	GMP synthase [glutamine-hydrolyzing]	743	syn	F->F	ko:K01951	GATase,GMP_synt_C,NAD_synthase,tRNA_Me_trans	-	-	-	-	-	-	-	-
42	AAQ_5	AAQ_5_131	AAQ	k77_128346	570	sub_T	201	no_sweep	0	AAQ_g56557_1	in	UniRef100_A0A417R1W9	82.285	GMP synthase [glutamine-hydrolyzing]	728	syn	Q->Q	ko:K01951	GATase,GMP_synt_C,NAD_synthase,tRNA_Me_trans	-	-	-	-	-	-	-	-
42	AAQ_5	AAQ_5_132	AAQ	k77_138401	14118	sub_A	201	no_sweep	0	AAQ_g90088_17	in	UniRef100_A0A417R6S1	100	Uncharacterized protein	1703	syn	Q->Q	ko:K02005	Biotin_lipoyl_2,HlyD_3,HlyD_D23	-	-	-	-	-	-	-	-
42	AAQ_5	AAQ_5_133	AAQ	k77_138401	14120	sub_T	201	no_sweep	0	AAQ_g90088_17	in	UniRef100_A0A417R6S1	100	Uncharacterized protein	1705	non_syn	Li->P	ko:K02005	Biotin_lipoyl_2,HlyD_3,HlyD_D23	-	-	-	-	-	-	-	-
42	AAQ_5	AAQ_5_134	AAQ	k77_154673	27938	sub_A	201	no_sweep	0	AAQ_g11719_32	in	UniRef100_A0A417R4K3	100	Carbamoyltransferase	1883	syn	G->G	ko:K04656	Acylphosphatase,Sua5_yciO_yrdC,zf-HYPF	-	-	-	-	-	-	-	-
42	AAQ_5	AAQ_5_135	AAQ	k77_154673	28045	sub_C	201	no_sweep	0	AAQ_g11719_32	in	UniRef100_A0A417R4K3	100	Carbamoyltransferase	1776	non_syn	A->T	ko:K04656	Acylphosphatase,Sua5_yciO_yrdC,zf-HYPF	-	-	-	-	-	-	-	-
42	AAQ_5	AAQ_5_136	AAQ	k77_154673	28094	sub_A	201	no_sweep	0	AAQ_g11719_32	in	UniRef100_A0A417R4K3	100	Carbamoyltransferase	1727	syn	Ii->Ii	ko:K04656	Acylphosphatase,Sua5_yciO_yrdC,zf-HYPF	-	-	-	-	-	-	-	-
42	AAQ_5	AAQ_5_137	AAQ	k77_154673	28097	sub_T	201	no_sweep	0	AAQ_g11719_32	in	UniRef100_A0A417R4K3	100	Carbamoyltransferase	1724	syn	E->E	ko:K04656	Acylphosphatase,Sua5_yciO_yrdC,zf-HYPF	-	-	-	-	-	-	-	-
42	AAQ_5	AAQ_5_138	AAQ	k77_154673	28105	sub_T	201	no_sweep	0	AAQ_g11719_32	in	UniRef100_A0A417R4K3	100	Carbamoyltransferase	1716	non_syn	T->A	ko:K04656	Acylphosphatase,Sua5_yciO_yrdC,zf-HYPF	-	-	-	-	-	-	-	-
42	AAQ_5	AAQ_5_139	AAQ	k77_156570	4123	sub_C	201	no_sweep	0	AAQ_g39668_6	in	UniRef100_A0A373V4C6	100	Thiamine phosphate synthase	305	syn	P->P	ko:K00788	TMP-TENI	-	-	-	-	-	-	-	-
42	AAQ_5	AAQ_5_140	AAQ	k77_162294	9126	sub_C	201	no_sweep	0	AAQ_g16383_10	in	UniRef100_A0A417R7F3	100	SsrA-binding protein	290	syn	G->G	ko:K03664	SmpB	-	-	-	-	-	-	-	-
42	AAQ_5	AAQ_5_141	AAQ	k77_162294	9129	sub_T	201	no_sweep	0	AAQ_g16383_10	in	UniRef100_A0A417R7F3	100	SsrA-binding protein	287	syn	E->E	ko:K03664	SmpB	-	-	-	-	-	-	-	-
42	AAQ_5	AAQ_5_142	AAQ	k77_190772	1273	sub_C	201	no_sweep	0	AAQ_g1914_2	in	UniRef100_A0A373VTY7	98	Copper homeostasis protein CutC	356	non_syn	Li->L	ko:K06201	CutC	-	-	-	-	-	-	-	-
42	AAQ_5	AAQ_5_143	AAQ	k77_190772	7299	sub_A	201	no_sweep	0	AAQ_g1914_7	in	UniRef100_A0A373VTR8	98.5	Uncharacterized protein	272	syn	S->S			-	-	-	-	-	-	-	-
42	AAQ_5	AAQ_5_144	AAQ	k77_197140	16925	sub_C	201	no_sweep	0	AAQ_g94207_18	in	UniRef100_A0A373VR86	99.7	Aldose 1-epimerase family protein	212	syn	Ii->Ii	-	Aldose_epim	-	-	-	-	-	-	-	-
42	AAQ_5	AAQ_5_145	AAQ	k77_197140	30767	sub_C	201	no_sweep	0	AAQ_g94207_30	in	UniRef100_A0A417R4P7	100	16S rRNA (cytosine(967)-C(5))-methyltransferase	971	syn	S->S	ko:K03500	Methyltr_RsmB-F,Methyltr_RsmF_N,NusB	-	-	-	-	-	-	-	-
42	AAQ_5	AAQ_5_146	AAQ	k77_209524	2980	sub_A	201	no_sweep	0	AAQ_g60898_3	in	UniRef100_A0A417R8F2	97.6	Pseudouridine synthase	284	syn	K->K	ko:K06180	PseudoU_synth_2	-	-	-	-	-	-	-	-
42	AAQ_5	AAQ_5_147	AAQ	k77_210300	20462	sub_G	201	no_sweep	0	AAQ_g71334_17	in	UniRef100_A0A373VEP9	98.8	Isopentenyl-diphosphate delta-isomerase	425	syn	Ii->Ii	-	ABC_ATPase	-	-	-	-	-	-	-	-
42	AAQ_5	AAQ_5_148	AAQ	k77_210300	29959	sub_C	201	no_sweep	0	AAQ_g71334_26	in	na	-1	na	263	syn	R->R			-	-	-	-	-	-	-	-
42	AAQ_5	AAQ_5_149	AAQ	k77_213513	12807	sub_G	201	no_sweep	0	AAQ_g13020_11	in	UniRef100_A0A417QW82	95.587	CDP-glucose 4,6-dehydratase	171	non_syn	Ii->V	ko:K01709	GDP_Man_Dehyd	-	-	-	-	-	-	-	-
42	AAQ_5	AAQ_5_150	AAQ	k77_213513	13226	sub_T	201	no_sweep	0	AAQ_g13020_11	in	UniRef100_A0A417QW82	95.587	CDP-glucose 4,6-dehydratase	590	syn	G->G	ko:K01709	GDP_Man_Dehyd	-	-	-	-	-	-	-	-
42	AAQ_5	AAQ_5_151	AAQ	k77_213513	14245	sub_A	201	no_sweep	0	AAQ_g13020_12	in	UniRef100_A0A417QW89	100	Uncharacterized protein	523	non_syn	D->G	-	-	-	-	-	-	-	-	-	-
42	AAQ_5	AAQ_5_152	AAQ	k77_213513	16939	sub_G	201	no_sweep	0	AAQ_g13020_13	in	UniRef100_A0A417QWG5	98.472	Lipopolysaccharide biosynthesis protein RfbH	1244	non_syn	Li->L	ko:K12452	DegT_DnrJ_EryC1	-	-	-	-	-	-	-	-
42	AAQ_5	AAQ_5_153	AAQ	k77_219335	3425	sub_G	201	no_sweep	0	-	-	-	-	-	-	-	-			-	-	-	-	-	-	-	-
42	AAQ_5	AAQ_5_154	AAQ	k77_219335	13155	sub_G	201	no_sweep	0	AAQ_g97388_10	in	UniRef100_A0A417R107	100	5'-methylthioadenosine/S-adenosylhomocysteine nucleosidase	317	syn	F->F	ko:K01243	PNP_UDP_1	-	-	-	-	-	-	-	-
42	AAQ_5	AAQ_5_155	AAQ	k77_219335	13161	sub_G	201	no_sweep	0	AAQ_g97388_10	in	UniRef100_A0A417R107	100	5'-methylthioadenosine/S-adenosylhomocysteine nucleosidase	311	syn	V->V	ko:K01243	PNP_UDP_1	-	-	-	-	-	-	-	-
42	AAQ_5	AAQ_5_156	AAQ	k77_228951	3608	sub_A	201	no_sweep	0	AAQ_g23267_5	in	UniRef100_A0A417R712	91.666	Ribosome maturation factor RimP	254	syn	S->S	ko:K09748	DUF150,DUF150_C	-	-	-	-	-	-	-	-
42	AAQ_5	AAQ_5_157	AAQ	k77_241655	16210	sub_T	201	no_sweep	0	AAQ_g95199_16	in	UniRef100_A0A417R846	100	Glutamate-1-semialdehyde 2,1-aminomutase	791	syn	G->G	ko:K01845	Aminotran_3	-	-	-	-	-	-	-	-
42	AAQ_5	AAQ_5_158	AAQ	k77_249607	4241	sub_A	201	no_sweep	0	AAQ_g4794_8	in	UniRef100_A0A1C5PEU7	98.8	Cyclic di-GMP phosphodiesterase response regulator RpfG	354	non_syn	K->E	-	HD,HD_5	-	-	-	-	-	-	-	-
42	AAQ_5	AAQ_5_159	AAQ	k77_249607	5235	sub_C	201	no_sweep	0	AAQ_g4794_10	in	UniRef100_UPI000E4A4EF5	98.7	sigma-70 family RNA polymerase sigma factor	91	non_syn	A->V	-	Sigma70_r4	-	-	-	-	-	-	-	-
42	AAQ_5	AAQ_5_160	AAQ	k77_249607	5293	sub_T	201	no_sweep	0	AAQ_g4794_10	in	UniRef100_UPI000E4A4EF5	98.7	sigma-70 family RNA polymerase sigma factor	149	syn	D->D	-	Sigma70_r4	-	-	-	-	-	-	-	-
42	AAQ_5	AAQ_5_161	AAQ	k77_249607	5332	sub_G	201	no_sweep	0	AAQ_g4794_10	in	UniRef100_UPI000E4A4EF5	98.7	sigma-70 family RNA polymerase sigma factor	188	non_syn	L->Li	-	Sigma70_r4	-	-	-	-	-	-	-	-
42	AAQ_5	AAQ_5_162	AAQ	k77_249607	5333	sub_T	201	no_sweep	0	AAQ_g4794_10	in	UniRef100_UPI000E4A4EF5	98.7	sigma-70 family RNA polymerase sigma factor	189	syn	Li->Li	-	Sigma70_r4	-	-	-	-	-	-	-	-
42	AAQ_5	AAQ_5_163	AAQ	k77_25603	896	sub_A	201	no_sweep	0	AAQ_g51725_2	upstream	na	-1	na	-185	undefined	undefined			AAQ_g51725_3	upstream	UniRef100_A0A417R5V9	99	Uncharacterized protein	-50	undefined	undefined	-	-
42	AAQ_5	AAQ_5_164	AAQ	k77_271743	13673	sub_T	201	no_sweep	0	AAQ_g6431_11	downstream	UniRef100_A0A417QSJ4	100	4Fe-4S dicluster domain-containing protein	989	undefined	undefined	-	Fer4,Fer4_4,Flavodoxin_5	AAQ_g6431_12	upstream	UniRef100_A0A417QVN9	100	Group II intron reverse transcriptase/maturase	-331	undefined	undefined	-	GIIM,RVT_1
42	AAQ_5	AAQ_5_165	AAQ	k77_271743	13896	sub_C	201	no_sweep	0	AAQ_g6431_11	downstream	UniRef100_A0A417QSJ4	100	4Fe-4S dicluster domain-containing protein	1212	undefined	undefined	-	Fer4,Fer4_4,Flavodoxin_5	AAQ_g6431_12	upstream	UniRef100_A0A417QVN9	100	Group II intron reverse transcriptase/maturase	-108	undefined	undefined	-	GIIM,RVT_1
42	AAQ_5	AAQ_5_166	AAQ	k77_271743	13907	sub_C	201	no_sweep	0	AAQ_g6431_11	downstream	UniRef100_A0A417QSJ4	100	4Fe-4S dicluster domain-containing protein	1223	undefined	undefined	-	Fer4,Fer4_4,Flavodoxin_5	AAQ_g6431_12	upstream	UniRef100_A0A417QVN9	100	Group II intron reverse transcriptase/maturase	-97	undefined	undefined	-	GIIM,RVT_1
42	AAQ_5	AAQ_5_167	AAQ	k77_271743	15167	sub_A	201	no_sweep	0	AAQ_g6431_12	in	UniRef100_A0A417QVN9	100	Group II intron reverse transcriptase/maturase	1163	syn	Q->Q	-	GIIM,RVT_1	-	-	-	-	-	-	-	-
42	AAQ_5	AAQ_5_168	AAQ	k77_271743	15173	sub_T	201	no_sweep	0	AAQ_g6431_12	in	UniRef100_A0A417QVN9	100	Group II intron reverse transcriptase/maturase	1169	non_syn	Ii->Mi	-	GIIM,RVT_1	-	-	-	-	-	-	-	-
42	AAQ_5	AAQ_5_169	AAQ	k77_279738	2892	sub_A	201	no_sweep	0	AAQ_g14737_6	in	UniRef100_A0A373VRA8	98.4	Prolyl-tRNA synthetase associated domain-containing protein	387	non_syn	V->Ii	ko:K19055	tRNA_edit	-	-	-	-	-	-	-	-
42	AAQ_5	AAQ_5_170	AAQ	k77_282571	9145	sub_C	201	no_sweep	0	AAQ_g56064_8	in	UniRef100_A0A417R054	99.1	Uncharacterized protein	1302	non_syn	A->S	-	-	-	-	-	-	-	-	-	-
42	AAQ_5	AAQ_5_171	AAQ	k77_282571	9155	sub_A	201	no_sweep	0	AAQ_g56064_8	in	UniRef100_A0A417R054	99.1	Uncharacterized protein	1292	syn	F->F	-	-	-	-	-	-	-	-	-	-
42	AAQ_5	AAQ_5_172	AAQ	k77_303418	2460	sub_G	201	no_sweep	0	AAQ_g36342_3	in	UniRef100_A0A417KK76	100	Sigma-70 family RNA polymerase sigma factor	238	non_syn	T->Ii	-	Sigma70_r4	-	-	-	-	-	-	-	-
42	AAQ_5	AAQ_5_173	AAQ	k77_303418	2636	sub_C	201	no_sweep	0	AAQ_g36342_3	in	UniRef100_A0A417KK76	100	Sigma-70 family RNA polymerase sigma factor	62	syn	P->P	-	Sigma70_r4	-	-	-	-	-	-	-	-
42	AAQ_5	AAQ_5_174	AAQ	k77_316036	9747	sub_T	201	no_sweep	0	AAQ_g11046_12	in	UniRef100_A0A417QYG3	100	Chloride channel protein	456	non_syn	K->E	ko:K03281	Voltage_CLC	-	-	-	-	-	-	-	-
42	AAQ_5	AAQ_5_175	AAQ	k77_316036	18104	sub_C	201	no_sweep	0	AAQ_g11046_20	in	UniRef100_A0A417QYL3	99.5	Methyltransferase domain-containing protein	109	non_syn	A->E	ko:K06987	AstE_AspA,Methyltransf_11	-	-	-	-	-	-	-	-
42	AAQ_5	AAQ_5_176	AAQ	k77_32981	6849	sub_A	201	no_sweep	0	AAQ_g56160_8	in	UniRef100_A0A417R532	100	tRNA1(Val) (Adenine(37)-N6)-methyltransferase	267	non_syn	A->T	ko:K15460	MTS,Methyltransf_31	-	-	-	-	-	-	-	-
42	AAQ_5	AAQ_5_177	AAQ	k77_32981	6870	sub_G	201	no_sweep	0	AAQ_g56160_8	in	UniRef100_A0A417R532	100	tRNA1(Val) (Adenine(37)-N6)-methyltransferase	288	non_syn	S->G	ko:K15460	MTS,Methyltransf_31	-	-	-	-	-	-	-	-
42	AAQ_5	AAQ_5_178	AAQ	k77_35383	34781	sub_A	201	no_sweep	0	AAQ_g90480_31	in	UniRef100_A0A417R052	99.6	Polysaccharide biosynthesis protein	38	syn	L->L	ko:K06409	Polysacc_synt,Polysacc_synt_C	-	-	-	-	-	-	-	-
42	AAQ_5	AAQ_5_179	AAQ	k77_359988	13493	sub_G	201	no_sweep	0	AAQ_g10287_13	in	UniRef100_A0A417QYC2	100	ATPase	146	syn	N->N	-	FGGY_C,FGGY_N	-	-	-	-	-	-	-	-
42	AAQ_5	AAQ_5_180	AAQ	k77_359988	14681	sub_A	201	no_sweep	0	AAQ_g10287_14	in	UniRef100_A0A417QYL0	99.8	L-arabinose isomerase	497	syn	T->T	ko:K01804	Arabinose_Iso_C,Arabinose_Isome	-	-	-	-	-	-	-	-
42	AAQ_5	AAQ_5_181	AAQ	k77_36545	10749	sub_C	201	no_sweep	0	AAQ_g102069_11	in	UniRef100_A0A417R2K3	100	dTDP-glucose 4,6-dehydratase	152	syn	N->N	ko:K01710	GDP_Man_Dehyd	-	-	-	-	-	-	-	-
42	AAQ_5	AAQ_5_182	AAQ	k77_374388	2446	sub_T	201	no_sweep	0	AAQ_g6160_1	in	UniRef100_A0A417QYT3	100	Ferrous iron transport protein B	2255	syn	Ii->Ii	ko:K04759	FeoA,FeoB_C,FeoB_N,Gate	-	-	-	-	-	-	-	-
42	AAQ_5	AAQ_5_183	AAQ	k77_374388	4020	sub_T	201	no_sweep	0	AAQ_g6160_3	in	UniRef100_A0A417QZ43	92.229	MerR family transcriptional regulator	159	syn	Li->Li	-	GyrI-like,MerR_1	-	-	-	-	-	-	-	-
42	AAQ_5	AAQ_5_184	AAQ	k77_374388	4637	sub_C	201	no_sweep	0	AAQ_g6160_3	in	UniRef100_A0A417QZ43	92.229	MerR family transcriptional regulator	776	syn	N->N	-	GyrI-like,MerR_1	-	-	-	-	-	-	-	-
42	AAQ_5	AAQ_5_185	AAQ	k77_390874	5274	sub_T	201	no_sweep	0	AAQ_g34800_8	in	UniRef100_A0A417QZ52	100	3-hydroxyacyl-[acyl-carrier-protein] dehydratase FabZ	380	syn	V->V	ko:K02372	FabA	-	-	-	-	-	-	-	-
42	AAQ_5	AAQ_5_186	AAQ	k77_390874	6403	sub_C	201	no_sweep	0	AAQ_g34800_9	in	UniRef100_A0A417QYJ2	100	Biotin carboxylase	1070	syn	D->D	ko:K01961	Biotin_carb_C,Biotin_carb_N,CPSase_L_D2	-	-	-	-	-	-	-	-
42	AAQ_5	AAQ_5_187	AAQ	k77_390874	19427	sub_A	201	no_sweep	0	AAQ_g34800_21	in	UniRef100_A0A417QYM7	100	Transport permease protein	35	syn	Y->Y	ko:K09692	ABC2_membrane	-	-	-	-	-	-	-	-
42	AAQ_5	AAQ_5_188	AAQ	k77_390874	19483	ins_T	201	no_sweep	0	AAQ_g34800_21	upstream	UniRef100_A0A417QYM7	100	Transport permease protein	-21	undefined	undefined	ko:K09692	ABC2_membrane	-	-	-	-	-	-	-	-
42	AAQ_5	AAQ_5_189	AAQ	k77_396560	1683	sub_C	201	no_sweep	0	AAQ_g8784_2	in	UniRef100_A0A417QWQ1	66.707	Glycosyl hydrolase	1397	syn	H->H	ko:K05349	Fn3-like,Glyco_hydro_3,Glyco_hydro_3_C	-	-	-	-	-	-	-	-
42	AAQ_5	AAQ_5_190	AAQ	k77_396560	1692	sub_C	201	no_sweep	0	AAQ_g8784_2	in	UniRef100_A0A417QWQ1	66.707	Glycosyl hydrolase	1406	syn	C->C	ko:K05349	Fn3-like,Glyco_hydro_3,Glyco_hydro_3_C	-	-	-	-	-	-	-	-
42	AAQ_5	AAQ_5_191	AAQ	k77_396560	1710	sub_C	201	no_sweep	0	AAQ_g8784_2	in	UniRef100_A0A417QWQ1	66.707	Glycosyl hydrolase	1424	syn	G->G	ko:K05349	Fn3-like,Glyco_hydro_3,Glyco_hydro_3_C	-	-	-	-	-	-	-	-
42	AAQ_5	AAQ_5_192	AAQ	k77_403534	12175	sub_G	201	no_sweep	0	AAQ_g4198_12	in	UniRef100_A0A417QY68	100	tRNA N6-adenosine threonylcarbamoyltransferase	257	syn	G->G	ko:K01409	Peptidase_M22	-	-	-	-	-	-	-	-
42	AAQ_5	AAQ_5_193	AAQ	k77_42580	793	sub_G	201	no_sweep	0	AAQ_g87466_2	in	UniRef100_A0A417R5L3	100	Flavodoxin family protein	456	non_syn	A->T	-	FMN_red	-	-	-	-	-	-	-	-
42	AAQ_5	AAQ_5_194	AAQ	k77_429442	7561	sub_G	201	no_sweep	0	AAQ_g61359_11	in	UniRef100_A0A373VQK5	99.3	Phosphoesterase	406	non_syn	T->S	ko:K07095	Metallophos_2	-	-	-	-	-	-	-	-
42	AAQ_5	AAQ_5_195	AAQ	k77_447472	2745	sub_C	201	no_sweep	0	AAQ_g2315_3	in	UniRef100_A0A417RAF1	100	Uncharacterized protein	443	syn	T->T	-	-	-	-	-	-	-	-	-	-
42	AAQ_5	AAQ_5_196	AAQ	k77_451186	282	sub_T	201	no_sweep	0	AAQ_g57833_1	in	UniRef100_A0A417R103	94.537	Microcompartment protein PduB	281	syn	H->H	-	BMC	-	-	-	-	-	-	-	-
42	AAQ_5	AAQ_5_197	AAQ	k77_88024	1537	sub_C	201	no_sweep	0	AAQ_g827_2	in	UniRef100_UPI0012B72DC4	83.323	transposase	480	non_syn	A->T	-	DDE_Tnp_IS66	-	-	-	-	-	-	-	-
42	AAQ_5	AAQ_5_198	AAQ	k77_91079	4259	sub_C	201	no_sweep	0	AAQ_g46749_4	in	UniRef100_A0A417QVJ5	93.9	Hydrolase	425	syn	T->T	ko:K21471	NLPC_P60	-	-	-	-	-	-	-	-
42	AAQ_5	AAQ_5_199	AAQ	k77_96192	14056	sub_C	201	no_sweep	0	AAQ_g11605_12	in	UniRef100_A0A417R8A2	100	ATP-dependent dethiobiotin synthetase BioD	312	non_syn	A->T	ko:K01935	AAA_26	-	-	-	-	-	-	-	-
42	AAQ_5	AAQ_5_200	AAQ	k77_96192	14067	sub_C	201	no_sweep	0	AAQ_g11605_12	in	UniRef100_A0A417R8A2	100	ATP-dependent dethiobiotin synthetase BioD	301	non_syn	R->H	ko:K01935	AAA_26	-	-	-	-	-	-	-	-
42	AAQ_5	AAQ_5_201	AAQ	k77_96192	15114	sub_G	201	no_sweep	0	AAQ_g11605_13	in	UniRef100_A0A417R864	100	Biotin synthase	245	syn	Y->Y	ko:K01012	BATS,Radical_SAM	-	-	-	-	-	-	-	-
42	AAQ_5	AAQ_5_202	AAQ	k77_239178	2158	sub_T	3	no_sweep	0	AAQ_g60793_3	downstream	UniRef100_A0A417R155	98.639	GatB/YqeY domain-containing protein	758	undefined	undefined	ko:K09117	YqeY	AAQ_g60793_4	downstream	UniRef100_A0A1C5VGZ6	100	Quinolinate synthase	1066	undefined	undefined	ko:K03517	NadA
42	AAQ_5	AAQ_5_203	AAQ	k77_289757	1508	sub_T	3	no_sweep	0	AAQ_g53655_4	in	UniRef100_A0A417QVQ6	100	Class I SAM-dependent methyltransferase	762	non_syn	V->Ii	-	Methyltransf_25,Methyltransf_31	-	-	-	-	-	-	-	-
42	AAQ_5	AAQ_5_204	AAQ	k77_289757	6219	sub_C	3	no_sweep	0	AAQ_g53655_8	in	UniRef100_A0A1C5R0S6	100	Macrocin-O-methyltransferase (TylF)	158	syn	S->S	ko:K05303	TylF	-	-	-	-	-	-	-	-
42	AAQ_5	AAQ_5_205	AAQ	k77_249607	7155	sub_G	3	no_sweep	0	AAQ_g4794_13	in	UniRef100_UPI0011DDCCA7	60.7	tyrosine-type recombinase/integrase	293	syn	G->G	-	Phage_int_SAM_3,Phage_int_SAM_5,Phage_integrase	-	-	-	-	-	-	-	-
42	AAQ_5	AAQ_5_206	AAQ	k77_249607	7236	sub_C	3	no_sweep	0	AAQ_g4794_13	in	UniRef100_UPI0011DDCCA7	60.7	tyrosine-type recombinase/integrase	374	syn	D->D	-	Phage_int_SAM_3,Phage_int_SAM_5,Phage_integrase	-	-	-	-	-	-	-	-
42	AAQ_5	AAQ_5_207	AAQ	k77_279636	4444	sub_A	3	no_sweep	0	AAQ_g13118_6	in	UniRef100_A0A174S5K9	98.9	Uncharacterized protein	648	syn	Li->Li	-	-	-	-	-	-	-	-	-	-
43	AAQ_6	AAQ_6_1	AAQ	k77_178022	2360	sub_T	134	no_sweep	406	AAQ_g25831_2	in	UniRef100_A0A373GP07	100	DNA gyrase subunit A	1232	syn	A->A	ko:K02469	DNA_gyraseA_C,DNA_topoisoIV	-	-	-	-	-	-	-	-
43	AAQ_6	AAQ_6_2	AAQ	k77_289443	1643	sub_A	134	no_sweep	0	AAQ_g48304_2	in	UniRef100_R7JW72	100	Uncharacterized protein	1112	syn	G->G	ko:K17318	SBP_bac_1,SBP_bac_8	-	-	-	-	-	-	-	-
43	AAQ_6	AAQ_6_3	AAQ	k77_289443	1649	sub_G	134	no_sweep	0	AAQ_g48304_2	in	UniRef100_R7JW72	100	Uncharacterized protein	1106	syn	V->V	ko:K17318	SBP_bac_1,SBP_bac_8	-	-	-	-	-	-	-	-
43	AAQ_6	AAQ_6_4	AAQ	k77_112308	3578	sub_C	134	no_sweep	0	AAQ_g36144_4	in	UniRef100_A0A373P9D7	99.6	ABC transporter permease	344	syn	F->F	ko:K02034	BPD_transp_1	-	-	-	-	-	-	-	-
43	AAQ_6	AAQ_6_5	AAQ	k77_131504	1329	sub_T	134	no_sweep	0	AAQ_g98971_2	in	UniRef100_A0A174UUY8	98.9	Cytosine permease	279	non_syn	D->N	ko:K10974	Transp_cyt_pur	-	-	-	-	-	-	-	-
43	AAQ_6	AAQ_6_6	AAQ	k77_157783	1931	sub_G	134	no_sweep	0	AAQ_g56200_2	upstream	UniRef100_A0A173YQN1	100	Shikimate dehydrogenase (NADP(+))	-32	undefined	undefined	ko:K00014	Shikimate_DH,Shikimate_dh_N	AAQ_g56200_3	downstream	UniRef100_A0A173YQU4	100	Shikimate dehydrogenase (NADP(+))	1057	undefined	undefined	ko:K00014	Shikimate_DH,Shikimate_dh_N
43	AAQ_6	AAQ_6_7	AAQ	k77_161899	484	sub_C	134	no_sweep	0	AAQ_g10238_1	in	UniRef100_A0A373S1M7	100	D-alanyl-D-alanine carboxypeptidase	243	non_syn	S->P	ko:K07258	Peptidase_S11	-	-	-	-	-	-	-	-
43	AAQ_6	AAQ_6_8	AAQ	k77_161961	2186	sub_G	134	no_sweep	0	AAQ_g11077_4	in	UniRef100_A0A174BXX8	100	Transcription termination factor Rho	1205	syn	L->L	ko:K03628	ATP-synt_ab,Rho_N,Rho_RNA_bind	-	-	-	-	-	-	-	-
43	AAQ_6	AAQ_6_9	AAQ	k77_222446	216	sub_G	134	no_sweep	0	AAQ_g36299_1	in	UniRef100_A0A3D1FWZ6	34.113	tRNA uridine-5-carboxymethylaminomethyl(34) synthesis GTPase MnmE (Fragment)	254	syn	G->G	ko:K03650	MMR_HSR1,MnmE_helical,TrmE_N	-	-	-	-	-	-	-	-
43	AAQ_6	AAQ_6_10	AAQ	k77_228400	5252	sub_G	134	no_sweep	0	AAQ_g15820_3	in	UniRef100_A0A174IU92	99.9	Histidine kinase	2208	non_syn	T->A	-	HATPase_c,HisKA	-	-	-	-	-	-	-	-
43	AAQ_6	AAQ_6_11	AAQ	k77_229381	3720	sub_C	134	no_sweep	0	AAQ_g30819_2	in	UniRef100_A0A416ZSK2	97.882	MATE family efflux transporter	1160	syn	Ii->Ii	-	MatE	-	-	-	-	-	-	-	-
43	AAQ_6	AAQ_6_12	AAQ	k77_229381	3945	sub_T	134	no_sweep	0	AAQ_g30819_2	in	UniRef100_A0A416ZSK2	97.882	MATE family efflux transporter	1385	syn	Ii->Ii	-	MatE	-	-	-	-	-	-	-	-
43	AAQ_6	AAQ_6_13	AAQ	k77_237194	11924	sub_C	134	no_sweep	0	AAQ_g35787_8	downstream	UniRef100_A0A174ARU2	100	Asparagine--tRNA ligase	1413	undefined	undefined	ko:K01893	tRNA-synt_2,tRNA_anti-codon	AAQ_g35787_9	upstream	UniRef100_A0A174AV52	100	Uncharacterized protein conserved in bacteria	-108	undefined	undefined	ko:K03547	Metallophos,Metallophos_2
43	AAQ_6	AAQ_6_14	AAQ	k77_245377	519	sub_C	134	no_sweep	0	AAQ_g54862_1	in	UniRef100_A0A373S458	68.135	Carbohydrate ABC transporter permease	518	syn	F->F	ko:K17320	BPD_transp_1	-	-	-	-	-	-	-	-
43	AAQ_6	AAQ_6_15	AAQ	k77_256326	4169	sub_G	134	no_sweep	0	AAQ_g103075_4	in	UniRef100_A0A174IJF7	96.569	Beta-N-acetylhexosaminidase	1020	non_syn	V->Ii	ko:K01190,ko:K12373	Big_4,DUF4838,DUF4982,F5_F8_type_C,Glug,Glyco_hydro_2,Glyco_hydro_20,Glyco_hydro_2_C,Glyco_hydro_2_N,Glyco_hydro_85	-	-	-	-	-	-	-	-
43	AAQ_6	AAQ_6_16	AAQ	k77_257483	314	sub_A	134	no_sweep	0	AAQ_g13970_1	in	UniRef100_A0A373GWL3	74.826	ABC transporter ATP-binding protein	313	non_syn	G->E	ko:K06148	ABC_membrane,ABC_tran	-	-	-	-	-	-	-	-
43	AAQ_6	AAQ_6_17	AAQ	k77_281293	3728	sub_G	134	no_sweep	0	AAQ_g39265_3	in	UniRef100_A0A173WFH0	99.7	Transcription-repair-coupling factor	2633	syn	E->E	ko:K03723	CarD_CdnL_TRCF,DEAD,Helicase_C,TRCF	-	-	-	-	-	-	-	-
43	AAQ_6	AAQ_6_18	AAQ	k77_316974	10030	sub_A	134	no_sweep	0	AAQ_g24658_11	in	UniRef100_A0A174D3C9	100	60 kDa chaperonin	1337	syn	L->L	ko:K04077	Cpn60_TCP1	-	-	-	-	-	-	-	-
43	AAQ_6	AAQ_6_19	AAQ	k77_316974	13946	sub_T	134	no_sweep	0	AAQ_g24658_14	in	UniRef100_A0A174D8B8	100	DNA topoisomerase 1	1406	non_syn	Ii->Mi	ko:K03168	Topoisom_bac,Toprim,zf-C4_Topoisom	-	-	-	-	-	-	-	-
43	AAQ_6	AAQ_6_20	AAQ	k77_316974	13947	sub_G	134	no_sweep	0	AAQ_g24658_14	in	UniRef100_A0A174D8B8	100	DNA topoisomerase 1	1405	non_syn	T->Mi	ko:K03168	Topoisom_bac,Toprim,zf-C4_Topoisom	-	-	-	-	-	-	-	-
43	AAQ_6	AAQ_6_21	AAQ	k77_317854	5342	sub_A	134	no_sweep	0	AAQ_g35524_9	in	UniRef100_A0A3D3RWF1	100	MATE family efflux transporter	1310	syn	Ii->Ii	-	MatE	-	-	-	-	-	-	-	-
43	AAQ_6	AAQ_6_22	AAQ	k77_317854	5345	sub_T	134	no_sweep	0	AAQ_g35524_9	in	UniRef100_A0A3D3RWF1	100	MATE family efflux transporter	1307	syn	T->T	-	MatE	-	-	-	-	-	-	-	-
43	AAQ_6	AAQ_6_23	AAQ	k77_338222	1261	sub_C	134	no_sweep	0	AAQ_g14357_2	in	UniRef100_A0A174V9B4	100	ABC-type transporter ATP-binding protein EcsA	509	syn	A->A	ko:K01990	ABC_tran	-	-	-	-	-	-	-	-
43	AAQ_6	AAQ_6_24	AAQ	k77_338222	1294	sub_A	134	no_sweep	0	AAQ_g14357_2	in	UniRef100_A0A174V9B4	100	ABC-type transporter ATP-binding protein EcsA	476	syn	D->D	ko:K01990	ABC_tran	-	-	-	-	-	-	-	-
43	AAQ_6	AAQ_6_25	AAQ	k77_354842	2102	sub_G	134	no_sweep	0	AAQ_g42721_2	upstream	UniRef100_A0A174D9A0	100	23S rRNA (Guanosine-2'-O-)-methyltransferase RlmB	-160	undefined	undefined	-	SpoU_methylase	AAQ_g42721_3	upstream	UniRef100_R7JRB1	99.3	Uncharacterized protein	-200	undefined	undefined	-	DUF2798
43	AAQ_6	AAQ_6_26	AAQ	k77_366407	3576	sub_G	134	no_sweep	0	AAQ_g103180_3	in	UniRef100_A0A174J7B3	100	Proline--tRNA ligase	1658	syn	Q->Q	ko:K01881	HGTP_anticodon,tRNA-synt_2b,tRNA_edit	-	-	-	-	-	-	-	-
43	AAQ_6	AAQ_6_27	AAQ	k77_366407	3594	sub_G	134	no_sweep	0	AAQ_g103180_3	in	UniRef100_A0A174J7B3	100	Proline--tRNA ligase	1676	non_syn	Vi->V	ko:K01881	HGTP_anticodon,tRNA-synt_2b,tRNA_edit	-	-	-	-	-	-	-	-
43	AAQ_6	AAQ_6_28	AAQ	k77_366928	2626	sub_G	134	no_sweep	0	AAQ_g4921_4	in	UniRef100_R7JVW5	99.5	Metallo-beta-lactamase domain protein	560	syn	D->D	-	Flavin_Reduct,Flavodoxin_1,Flavodoxin_5,Lactamase_B	-	-	-	-	-	-	-	-
43	AAQ_6	AAQ_6_29	AAQ	k77_366928	2656	sub_A	134	no_sweep	0	AAQ_g4921_4	in	UniRef100_R7JVW5	99.5	Metallo-beta-lactamase domain protein	530	syn	G->G	-	Flavin_Reduct,Flavodoxin_1,Flavodoxin_5,Lactamase_B	-	-	-	-	-	-	-	-
43	AAQ_6	AAQ_6_30	AAQ	k77_375540	7427	sub_C	134	no_sweep	0	AAQ_g22692_10	in	UniRef100_A0A174MNP0	83.216	Serine--tRNA ligase	845	syn	H->H	ko:K01875	Seryl_tRNA_N,tRNA-synt_2b	-	-	-	-	-	-	-	-
43	AAQ_6	AAQ_6_31	AAQ	k77_375540	7436	sub_G	134	no_sweep	0	AAQ_g22692_10	in	UniRef100_A0A174MNP0	83.216	Serine--tRNA ligase	854	syn	E->E	ko:K01875	Seryl_tRNA_N,tRNA-synt_2b	-	-	-	-	-	-	-	-
43	AAQ_6	AAQ_6_32	AAQ	k77_400196	3808	sub_C	134	no_sweep	0	AAQ_g59614_3	in	UniRef100_R7JU32	99.2	Oxidoreductase family NAD-binding Rossmann fold domain protein	488	non_syn	Li->L	-	GFO_IDH_MocA,GFO_IDH_MocA_C	-	-	-	-	-	-	-	-
43	AAQ_6	AAQ_6_33	AAQ	k77_400349	3781	sub_G	134	no_sweep	0	AAQ_g62850_3	downstream	UniRef100_A0A174AQQ7	99.1	5'-methylthioadenosine/S-adenosylhomocysteine nucleosidase	905	undefined	undefined	ko:K01243	PNP_UDP_1	AAQ_g62850_4	upstream	UniRef100_R7JUJ8	99.6	Uncharacterized protein	-284	undefined	undefined	-	-
43	AAQ_6	AAQ_6_34	AAQ	k77_400349	7035	sub_C	134	no_sweep	0	AAQ_g62850_7	in	UniRef100_A0A373MX39	100	AraC family transcriptional regulator	288	non_syn	A->S	-	ARD,AraC_binding,Cupin_2,HTH_18	-	-	-	-	-	-	-	-
43	AAQ_6	AAQ_6_35	AAQ	k77_400989	3099	sub_T	134	no_sweep	0	AAQ_g70982_4	in	UniRef100_A0A174EA33	100	Cell division protein FtsX	383	syn	S->S	ko:K09811	FtsX	-	-	-	-	-	-	-	-
43	AAQ_6	AAQ_6_36	AAQ	k77_400989	3558	sub_C	134	no_sweep	0	AAQ_g70982_4	in	UniRef100_A0A174EA33	100	Cell division protein FtsX	842	syn	V->V	ko:K09811	FtsX	-	-	-	-	-	-	-	-
43	AAQ_6	AAQ_6_37	AAQ	k77_408870	5583	sub_C	134	no_sweep	0	AAQ_g90097_4	in	UniRef100_A0A373P9P7	99.2	PTS glucose transporter subunit IIA	969	syn	Li->Li	ko:K20116,ko:K20117,ko:K20118	PTS_EIIA_1,PTS_EIIB,PTS_EIIC	-	-	-	-	-	-	-	-
43	AAQ_6	AAQ_6_38	AAQ	k77_421521	5713	sub_G	134	no_sweep	0	AAQ_g54744_8	in	UniRef100_A0A373GTV8	99.9	Cyclic-di-AMP phosphodiesterase	1242	non_syn	R->S	-	DHH,DHHA1	-	-	-	-	-	-	-	-
43	AAQ_6	AAQ_6_39	AAQ	k77_440172	14785	sub_C	134	no_sweep	0	AAQ_g4828_14	in	UniRef100_A0A174JJL9	99.9	Lon protease	1254	syn	Li->Li	ko:K01338	AAA,LON_substr_bdg,Lon_C	-	-	-	-	-	-	-	-
43	AAQ_6	AAQ_6_40	AAQ	k77_447991	230	sub_G	134	no_sweep	0	AAQ_g8538_1	downstream	UniRef100_A0A396PHA9	100	Mac domain-containing protein	190	undefined	undefined	ko:K00633	Hexapep,Hexapep_2,Mac	AAQ_g8538_2	upstream	UniRef100_A0A396P933	78.827	Sodium:alanine symporter family protein	-400	undefined	undefined	ko:K03310	Na_Ala_symp
43	AAQ_6	AAQ_6_41	AAQ	k77_458898	9947	sub_C	134	no_sweep	0	AAQ_g60585_9	in	UniRef100_R7JUU3	99.8	SBP_bac_5 domain-containing protein	1430	syn	Y->Y	ko:K02035	SBP_bac_5	-	-	-	-	-	-	-	-
43	AAQ_6	AAQ_6_42	AAQ	k77_465929	5957	sub_T	134	no_sweep	0	AAQ_g56882_4	in	UniRef100_R7JTG1	100	Penicillin-binding protein 1A family	57	non_syn	G->R	ko:K05366	Transgly,Transpeptidase	-	-	-	-	-	-	-	-
43	AAQ_6	AAQ_6_43	AAQ	k77_467866	5224	sub_T	134	no_sweep	0	AAQ_g81211_5	in	UniRef100_A0A174BY10	100	Anaerobic ribonucleoside-triphosphate reductase	347	syn	D->D	ko:K21636	ATP-cone,NRDD	-	-	-	-	-	-	-	-
43	AAQ_6	AAQ_6_44	AAQ	k77_97821	15139	sub_A	134	no_sweep	0	AAQ_g36078_11	in	UniRef100_A0A416SEH2	99.9	ATP-dependent RecD-like DNA helicase	1365	non_syn	Ii->V	ko:K03581	AAA_30,HHH_4,HHH_5,UvrD_C_2	-	-	-	-	-	-	-	-
43	AAQ_6	AAQ_6_45	AAQ	k77_112308	1039	sub_A	134	no_sweep	0	AAQ_g36144_1	in	UniRef100_A0A417HXD3	98.7	DegV family protein	701	non_syn	E->D	-	DegV	-	-	-	-	-	-	-	-
43	AAQ_6	AAQ_6_46	AAQ	k77_112308	1048	sub_G	134	no_sweep	0	AAQ_g36144_1	in	UniRef100_A0A417HXD3	98.7	DegV family protein	710	non_syn	K->N	-	DegV	-	-	-	-	-	-	-	-
43	AAQ_6	AAQ_6_47	AAQ	k77_115003	1322	sub_T	134	no_sweep	0	AAQ_g71490_2	in	UniRef100_A0A174R2F5	99.6	Uncharacterized protein	653	syn	D->D	-	TPR_8	-	-	-	-	-	-	-	-
43	AAQ_6	AAQ_6_48	AAQ	k77_115003	1324	sub_C	134	no_sweep	0	AAQ_g71490_2	in	UniRef100_A0A174R2F5	99.6	Uncharacterized protein	655	non_syn	A->V	-	TPR_8	-	-	-	-	-	-	-	-
43	AAQ_6	AAQ_6_49	AAQ	k77_117786	6100	sub_C	134	no_sweep	0	AAQ_g7821_8	in	UniRef100_A0A174UVG6	100	Purine nucleoside phosphorylase	659	syn	C->C	ko:K03783	PNP_UDP_1	-	-	-	-	-	-	-	-
43	AAQ_6	AAQ_6_50	AAQ	k77_125237	2338	sub_A	134	no_sweep	0	AAQ_g8626_2	in	UniRef100_A0A396P611	99.7	Uncharacterized protein	380	syn	T->T	-	-	-	-	-	-	-	-	-	-
43	AAQ_6	AAQ_6_51	AAQ	k77_125237	4404	sub_T	134	no_sweep	0	AAQ_g8626_4	in	UniRef100_A0A174KS10	99.5	Uncharacterized protein involved in cytokinesis, contains TGc (Transglutaminase/protease-like) domain	533	syn	F->F	-	Transglut_core	-	-	-	-	-	-	-	-
43	AAQ_6	AAQ_6_52	AAQ	k77_134175	337	sub_G	134	no_sweep	0	AAQ_g31712_1	in	UniRef100_A0A417X2J1	99.7	DUF885 domain-containing protein	158	syn	A->A	-	DUF885	-	-	-	-	-	-	-	-
43	AAQ_6	AAQ_6_53	AAQ	k77_140085	1836	sub_T	134	no_sweep	0	AAQ_g11727_2	in	UniRef100_A0A357GQT4	97.953	ROK family transcriptional regulator	83	syn	A->A	-	HTH_24,MarR_2,ROK	-	-	-	-	-	-	-	-
43	AAQ_6	AAQ_6_54	AAQ	k77_14284	1660	sub_T	134	no_sweep	0	AAQ_g99850_3	in	UniRef100_A0A174DB42	100	3-oxoacyl-[acyl-carrier-protein] synthase 2	554	syn	C->C	ko:K09458	Ketoacyl-synt_C,ketoacyl-synt	-	-	-	-	-	-	-	-
43	AAQ_6	AAQ_6_55	AAQ	k77_14284	3734	sub_T	134	no_sweep	0	AAQ_g99850_6	in	UniRef100_A0A417WZI8	100	Biotin carboxylase	380	syn	G->G	ko:K01961	Biotin_carb_C,Biotin_carb_N,CPSase_L_D2	-	-	-	-	-	-	-	-
43	AAQ_6	AAQ_6_56	AAQ	k77_172604	300	sub_T	134	no_sweep	0	AAQ_g57381_1	upstream	UniRef100_A0A417CE93	25.205	Molybdenum transport system permease	-120	undefined	undefined	ko:K02018	BPD_transp_1	AAQ_g57381_2	downstream	UniRef100_A0A174F8I4	100	Molybdate-binding periplasmic protein	981	undefined	undefined	ko:K02020	SBP_bac_11
43	AAQ_6	AAQ_6_57	AAQ	k77_172646	2643	sub_C	134	no_sweep	0	AAQ_g57814_3	in	UniRef100_A0A173WPG0	100	Domain of uncharacterized function (DUF377)	278	syn	Ii->Ii	ko:K18785	Glyco_hydro_130	-	-	-	-	-	-	-	-
43	AAQ_6	AAQ_6_58	AAQ	k77_194004	1681	sub_A	134	no_sweep	0	AAQ_g49024_3	in	UniRef100_A0A174R216	100	V-type ATP synthase subunit C	260	non_syn	V->Vi	ko:K02119	vATP-synt_AC39	-	-	-	-	-	-	-	-
43	AAQ_6	AAQ_6_59	AAQ	k77_19972	590	sub_G	134	no_sweep	0	AAQ_g79740_2	in	UniRef100_A0A416XY93	100	Glycoside hydrolase family 125 protein	266	non_syn	Li->L	ko:K09704	Glyco_hydro_125	-	-	-	-	-	-	-	-
43	AAQ_6	AAQ_6_60	AAQ	k77_205420	3624	del_1	134	no_sweep	0	AAQ_g2567_2	downstream	UniRef100_A0A417C409	96.22	Mechanosensitive ion channel family protein	1022	undefined	undefined	ko:K03442	MS_channel,TM_helix	AAQ_g2567_3	upstream	UniRef100_A0A3D3RVB5	100	Ribosome maturation factor RimP	-18	undefined	undefined	ko:K09748	DUF150,DUF150_C
43	AAQ_6	AAQ_6_61	AAQ	k77_205420	3770	sub_C	134	no_sweep	0	AAQ_g2567_3	in	UniRef100_A0A3D3RVB5	100	Ribosome maturation factor RimP	128	syn	Y->Y	ko:K09748	DUF150,DUF150_C	-	-	-	-	-	-	-	-
43	AAQ_6	AAQ_6_62	AAQ	k77_210067	1772	sub_G	134	no_sweep	0	AAQ_g67811_1	in	UniRef100_R7JYN0	98.778	Predicted deacylase	1771	non_syn	R->H	ko:K06987	AstE_AspA,Methyltransf_11	-	-	-	-	-	-	-	-
43	AAQ_6	AAQ_6_63	AAQ	k77_217225	246	sub_T	134	no_sweep	0	AAQ_g66391_1	in	UniRef100_A0A396P409	73.297	Ribosomal RNA small subunit methyltransferase I	377	syn	S->S	ko:K07056	TP_methylase	-	-	-	-	-	-	-	-
43	AAQ_6	AAQ_6_64	AAQ	k77_217225	888	sub_A	134	no_sweep	0	AAQ_g66391_2	in	UniRef100_A0A174PN77	99.6	tRNA1(Val) (Adenine(37)-N6)-methyltransferase	489	syn	Li->Li	ko:K15460	MTS,Methyltransf_31	-	-	-	-	-	-	-	-
43	AAQ_6	AAQ_6_65	AAQ	k77_217225	889	sub_A	134	no_sweep	0	AAQ_g66391_2	in	UniRef100_A0A174PN77	99.6	tRNA1(Val) (Adenine(37)-N6)-methyltransferase	488	syn	V->V	ko:K15460	MTS,Methyltransf_31	-	-	-	-	-	-	-	-
43	AAQ_6	AAQ_6_66	AAQ	k77_217225	907	sub_C	134	no_sweep	0	AAQ_g66391_2	in	UniRef100_A0A174PN77	99.6	tRNA1(Val) (Adenine(37)-N6)-methyltransferase	470	syn	A->A	ko:K15460	MTS,Methyltransf_31	-	-	-	-	-	-	-	-
43	AAQ_6	AAQ_6_67	AAQ	k77_217225	925	sub_G	134	no_sweep	0	AAQ_g66391_2	in	UniRef100_A0A174PN77	99.6	tRNA1(Val) (Adenine(37)-N6)-methyltransferase	452	syn	C->C	ko:K15460	MTS,Methyltransf_31	-	-	-	-	-	-	-	-
43	AAQ_6	AAQ_6_68	AAQ	k77_217225	949	sub_C	134	no_sweep	0	AAQ_g66391_2	in	UniRef100_A0A174PN77	99.6	tRNA1(Val) (Adenine(37)-N6)-methyltransferase	428	syn	T->T	ko:K15460	MTS,Methyltransf_31	-	-	-	-	-	-	-	-
43	AAQ_6	AAQ_6_69	AAQ	k77_21897	2014	sub_A	134	no_sweep	0	AAQ_g102744_2	in	UniRef100_A0A396P551	99.3	Beta-glucosidase	320	syn	T->T	ko:K05349	CBM_6,Fn3-like,Glyco_hydro_3,Glyco_hydro_3_C	-	-	-	-	-	-	-	-
43	AAQ_6	AAQ_6_70	AAQ	k77_21897	2020	sub_C	134	no_sweep	0	AAQ_g102744_2	in	UniRef100_A0A396P551	99.3	Beta-glucosidase	326	syn	T->T	ko:K05349	CBM_6,Fn3-like,Glyco_hydro_3,Glyco_hydro_3_C	-	-	-	-	-	-	-	-
43	AAQ_6	AAQ_6_71	AAQ	k77_21897	2029	sub_C	134	no_sweep	0	AAQ_g102744_2	in	UniRef100_A0A396P551	99.3	Beta-glucosidase	335	syn	R->R	ko:K05349	CBM_6,Fn3-like,Glyco_hydro_3,Glyco_hydro_3_C	-	-	-	-	-	-	-	-
43	AAQ_6	AAQ_6_72	AAQ	k77_229381	1218	sub_G	134	no_sweep	0	AAQ_g30819_1	in	UniRef100_A0A174EKA4	99.6	Periplasmic beta-glucosidase	1053	non_syn	V->Ii	ko:K05349	Fn3-like,Glyco_hydro_3,Glyco_hydro_3_C	-	-	-	-	-	-	-	-
43	AAQ_6	AAQ_6_73	AAQ	k77_229381	1838	sub_T	134	no_sweep	0	AAQ_g30819_1	in	UniRef100_A0A174EKA4	99.6	Periplasmic beta-glucosidase	1673	syn	F->F	ko:K05349	Fn3-like,Glyco_hydro_3,Glyco_hydro_3_C	-	-	-	-	-	-	-	-
43	AAQ_6	AAQ_6_74	AAQ	k77_237194	484	sub_G	134	no_sweep	0	AAQ_g35787_1	in	UniRef100_A0A416XYA0	85.55	Hydratase	483	non_syn	E->K	ko:K01681	Aconitase,Aconitase_C	-	-	-	-	-	-	-	-
43	AAQ_6	AAQ_6_75	AAQ	k77_249687	3114	sub_G	134	no_sweep	0	AAQ_g5824_3	in	UniRef100_A0A416SBK1	100	Aspartate ammonia-lyase	302	syn	A->A	ko:K01744	FumaraseC_C,Lyase_1	-	-	-	-	-	-	-	-
43	AAQ_6	AAQ_6_76	AAQ	k77_268575	6679	sub_C	134	no_sweep	0	AAQ_g77792_7	in	UniRef100_A0A174MNU6	100	DUF based on E. rectale Gene description	739	non_syn	R->Q	-	DUF3881	-	-	-	-	-	-	-	-
43	AAQ_6	AAQ_6_77	AAQ	k77_268872	2484	sub_A	134	no_sweep	0	AAQ_g82250_2	in	UniRef100_A0A174QMG4	99.8	Oligoendopeptidase F, plasmid	869	syn	V->V	-	Peptidase_M3,Peptidase_M3_N	-	-	-	-	-	-	-	-
43	AAQ_6	AAQ_6_78	AAQ	k77_274520	906	sub_C	134	no_sweep	0	AAQ_g47731_1	in	UniRef100_A0A174PGM1	91.545	Aminopeptidase pepS	233	syn	T->T	ko:K19689	Peptidase_M29	-	-	-	-	-	-	-	-
43	AAQ_6	AAQ_6_79	AAQ	k77_281293	6015	sub_A	134	no_sweep	0	AAQ_g39265_4	in	UniRef100_A0A417MLQ4	89.218	Uncharacterized protein	1208	syn	E->E	ko:K07533	Rotamase,Rotamase_2,SurA_N_3	-	-	-	-	-	-	-	-
43	AAQ_6	AAQ_6_80	AAQ	k77_295731	1490	sub_A	134	no_sweep	0	AAQ_g38247_3	in	UniRef100_A0A3D3RSJ1	94.927	Putative agmatine deiminase	164	syn	K->K	ko:K10536	PAD_porph	-	-	-	-	-	-	-	-
43	AAQ_6	AAQ_6_81	AAQ	k77_295731	1496	sub_G	134	no_sweep	0	AAQ_g38247_3	in	UniRef100_A0A3D3RSJ1	94.927	Putative agmatine deiminase	170	syn	S->S	ko:K10536	PAD_porph	-	-	-	-	-	-	-	-
43	AAQ_6	AAQ_6_82	AAQ	k77_29840	4202	sub_A	134	no_sweep	0	AAQ_g9611_7	in	UniRef100_A0A174MWA6	100	Stage II sporulation protein E	1079	syn	P->P	ko:K06382	SpoIIE	-	-	-	-	-	-	-	-
43	AAQ_6	AAQ_6_83	AAQ	k77_314584	2489	sub_G	134	no_sweep	0	AAQ_g87795_4	in	UniRef100_R7JPX2	100	Glutamate racemase	449	syn	F->F	ko:K01776	Asp_Glu_race	-	-	-	-	-	-	-	-
43	AAQ_6	AAQ_6_84	AAQ	k77_314584	3386	sub_C	134	no_sweep	0	AAQ_g87795_5	in	UniRef100_A0A3D1EBK2	100	Stage II sporulation protein R	496	non_syn	N->S	ko:K06387	Spore_II_R	-	-	-	-	-	-	-	-
43	AAQ_6	AAQ_6_85	AAQ	k77_316974	16365	sub_A	134	no_sweep	0	AAQ_g24658_15	in	UniRef100_A0A174D4G4	100	DNA protecting protein DprA	224	syn	S->S	ko:K04096	DNA_processg_A	-	-	-	-	-	-	-	-
43	AAQ_6	AAQ_6_86	AAQ	k77_331263	264	sub_C	134	no_sweep	0	AAQ_g18329_1	in	UniRef100_A0A174PF54	87.589	L-aminopeptidase/D-esterase	263	syn	V->V	ko:K01266	Peptidase_S58	-	-	-	-	-	-	-	-
43	AAQ_6	AAQ_6_87	AAQ	k77_331263	273	sub_T	134	no_sweep	0	AAQ_g18329_1	in	UniRef100_A0A174PF54	87.589	L-aminopeptidase/D-esterase	272	syn	C->C	ko:K01266	Peptidase_S58	-	-	-	-	-	-	-	-
43	AAQ_6	AAQ_6_88	AAQ	k77_331263	276	sub_T	134	no_sweep	0	AAQ_g18329_1	in	UniRef100_A0A174PF54	87.589	L-aminopeptidase/D-esterase	275	syn	N->N	ko:K01266	Peptidase_S58	-	-	-	-	-	-	-	-
43	AAQ_6	AAQ_6_89	AAQ	k77_331263	279	sub_T	134	no_sweep	0	AAQ_g18329_1	in	UniRef100_A0A174PF54	87.589	L-aminopeptidase/D-esterase	278	syn	D->D	ko:K01266	Peptidase_S58	-	-	-	-	-	-	-	-
43	AAQ_6	AAQ_6_90	AAQ	k77_334295	1422	sub_T	134	no_sweep	0	AAQ_g57946_2	in	UniRef100_A0A417I9S9	100	Class I SAM-dependent rRNA methyltransferase	617	syn	F->F	ko:K06969	Methyltrans_SAM,PUA	-	-	-	-	-	-	-	-
43	AAQ_6	AAQ_6_91	AAQ	k77_340574	2415	sub_A	134	no_sweep	0	AAQ_g48945_2	in	UniRef100_A0A417C7H2	99.7	Response regulator	1854	syn	Li->Li	-	GGDEF,HATPase_c,HisKA,PAS_4,Response_reg,SBP_bac_3	-	-	-	-	-	-	-	-
43	AAQ_6	AAQ_6_92	AAQ	k77_340574	3121	sub_G	134	no_sweep	0	AAQ_g48945_2	in	UniRef100_A0A417C7H2	99.7	Response regulator	1148	syn	C->C	-	GGDEF,HATPase_c,HisKA,PAS_4,Response_reg,SBP_bac_3	-	-	-	-	-	-	-	-
43	AAQ_6	AAQ_6_93	AAQ	k77_350056	986	sub_G	134	no_sweep	0	AAQ_g80403_2	in	UniRef100_A0A417C834	100	Uncharacterized protein	2855	syn	D->D	-	TPR_8	-	-	-	-	-	-	-	-
43	AAQ_6	AAQ_6_94	AAQ	k77_356381	4147	sub_A	134	no_sweep	0	AAQ_g65168_5	in	UniRef100_A0A174H7C0	99.7	30S ribosomal protein S1	763	non_syn	S->N	ko:K06959	HHH_3,S1,Tex_N,Tex_YqgF	-	-	-	-	-	-	-	-
43	AAQ_6	AAQ_6_95	AAQ	k77_356381	8568	sub_T	134	no_sweep	0	AAQ_g65168_9	in	UniRef100_A0A417CD06	99.5	Uncharacterized protein	1017	non_syn	D->N	-	-	-	-	-	-	-	-	-	-
43	AAQ_6	AAQ_6_96	AAQ	k77_356381	9174	sub_A	134	no_sweep	0	AAQ_g65168_9	in	UniRef100_A0A417CD06	99.5	Uncharacterized protein	411	non_syn	P->S	-	-	-	-	-	-	-	-	-	-
43	AAQ_6	AAQ_6_97	AAQ	k77_36711	4646	sub_T	134	no_sweep	0	AAQ_g1175_4	in	UniRef100_A0A174PIA8	98.5	Chromosome segregation protein	2117	syn	A->A	ko:K01421	-	-	-	-	-	-	-	-	-
43	AAQ_6	AAQ_6_98	AAQ	k77_36711	5150	sub_G	134	no_sweep	0	AAQ_g1175_4	in	UniRef100_A0A174PIA8	98.5	Chromosome segregation protein	1613	syn	T->T	ko:K01421	-	-	-	-	-	-	-	-	-
43	AAQ_6	AAQ_6_99	AAQ	k77_36711	5171	sub_T	134	no_sweep	0	AAQ_g1175_4	in	UniRef100_A0A174PIA8	98.5	Chromosome segregation protein	1592	syn	A->A	ko:K01421	-	-	-	-	-	-	-	-	-
43	AAQ_6	AAQ_6_100	AAQ	k77_381185	10005	sub_G	134	no_sweep	0	AAQ_g98465_7	upstream	UniRef100_A0A417MT81	99.6	Polysaccharide biosynthesis protein	-125	undefined	undefined	ko:K06409	Polysacc_synt,Polysacc_synt_C	AAQ_g98465_8	upstream	UniRef100_A0A174AC28	100	Cysteine metabolism repressor	-34	undefined	undefined	-	Rrf2
43	AAQ_6	AAQ_6_101	AAQ	k77_388912	7373	sub_A	134	no_sweep	0	AAQ_g3654_10	upstream	UniRef100_A0A373P684	99.6	Putative selenium-dependent hydroxylase accessory protein YqeC	-72	undefined	undefined	-	-	AAQ_g3654_11	downstream	UniRef100_A0A373RZF8	99.6	DUF5011 domain-containing protein	801	undefined	undefined	-	-
43	AAQ_6	AAQ_6_102	AAQ	k77_388912	7379	sub_A	134	no_sweep	0	AAQ_g3654_10	upstream	UniRef100_A0A373P684	99.6	Putative selenium-dependent hydroxylase accessory protein YqeC	-78	undefined	undefined	-	-	AAQ_g3654_11	downstream	UniRef100_A0A373RZF8	99.6	DUF5011 domain-containing protein	795	undefined	undefined	-	-
43	AAQ_6	AAQ_6_103	AAQ	k77_388912	11912	sub_A	134	no_sweep	0	AAQ_g3654_16	in	UniRef100_A0A174F6J8	100	dTDP-glucose 4,6-dehydratase	929	syn	Ii->Ii	ko:K01710	GDP_Man_Dehyd	-	-	-	-	-	-	-	-
43	AAQ_6	AAQ_6_104	AAQ	k77_389706	12797	sub_G	134	no_sweep	0	AAQ_g17967_11	in	UniRef100_R7JRN8	27.908	Carboxylic ester hydrolase	236	syn	L->L	ko:K03929	COesterase	-	-	-	-	-	-	-	-
43	AAQ_6	AAQ_6_105	AAQ	k77_39364	1248	sub_C	134	no_sweep	0	AAQ_g43311_2	in	UniRef100_UPI001313DD9F	99.2	family 78 glycoside hydrolase catalytic domain	143	syn	T->T	-	Bac_rhamnosid,Bac_rhamnosid6H,Bac_rhamnosid_C,Bac_rhamnosid_N,FIVAR	-	-	-	-	-	-	-	-
43	AAQ_6	AAQ_6_106	AAQ	k77_398019	2952	sub_T	134	no_sweep	0	AAQ_g29909_4	in	UniRef100_A0A416S4G2	99.8	Peptidase S8	1413	non_syn	A->T	-	Peptidase_S8	-	-	-	-	-	-	-	-
43	AAQ_6	AAQ_6_107	AAQ	k77_398019	4845	sub_C	134	no_sweep	0	AAQ_g29909_5	in	UniRef100_A0A416S4P5	99.8	Trk system potassium transporter TrkA	293	syn	V->V	ko:K03499	TrkA_C,TrkA_N	-	-	-	-	-	-	-	-
43	AAQ_6	AAQ_6_108	AAQ	k77_400196	630	sub_C	134	no_sweep	0	AAQ_g59614_1	in	UniRef100_A0A373P9H2	99.7	Beta_helix domain-containing protein	1427	syn	T->T	-	Beta_helix,DUF1565	-	-	-	-	-	-	-	-
43	AAQ_6	AAQ_6_109	AAQ	k77_400196	908	sub_G	134	no_sweep	0	AAQ_g59614_1	in	UniRef100_A0A373P9H2	99.7	Beta_helix domain-containing protein	1149	syn	Li->Li	-	Beta_helix,DUF1565	-	-	-	-	-	-	-	-
43	AAQ_6	AAQ_6_110	AAQ	k77_400196	6213	sub_C	134	no_sweep	0	AAQ_g59614_4	in	UniRef100_A0A416XTU4	99.9	ABC transporter permease	2531	syn	A->A	ko:K02004	FtsX,MacB_PCD	-	-	-	-	-	-	-	-
43	AAQ_6	AAQ_6_111	AAQ	k77_400196	6453	sub_A	134	no_sweep	0	AAQ_g59614_4	in	UniRef100_A0A416XTU4	99.9	ABC transporter permease	2291	syn	D->D	ko:K02004	FtsX,MacB_PCD	-	-	-	-	-	-	-	-
43	AAQ_6	AAQ_6_112	AAQ	k77_400196	8313	sub_T	134	no_sweep	0	AAQ_g59614_4	in	UniRef100_A0A416XTU4	99.9	ABC transporter permease	431	syn	G->G	ko:K02004	FtsX,MacB_PCD	-	-	-	-	-	-	-	-
43	AAQ_6	AAQ_6_113	AAQ	k77_400196	8337	sub_T	134	no_sweep	0	AAQ_g59614_4	in	UniRef100_A0A416XTU4	99.9	ABC transporter permease	407	non_syn	Li->L	ko:K02004	FtsX,MacB_PCD	-	-	-	-	-	-	-	-
43	AAQ_6	AAQ_6_114	AAQ	k77_404913	300	sub_C	134	no_sweep	0	AAQ_g27916_1	in	UniRef100_A0A355SGH5	39.87	Uncharacterized protein (Fragment)	132	non_syn	D->N	-	-	-	-	-	-	-	-	-	-
43	AAQ_6	AAQ_6_115	AAQ	k77_421028	2559	sub_A	134	no_sweep	0	AAQ_g47007_2	in	UniRef100_A0A416ES28	99.1	Glycosyl hydrolase family 31	1223	syn	F->F	-	CBM_35,Gal_mutarotas_2,Glyco_hydro_31	-	-	-	-	-	-	-	-
43	AAQ_6	AAQ_6_116	AAQ	k77_422389	1110	sub_T	134	no_sweep	0	AAQ_g66414_2	in	UniRef100_A0A174NU75	100	Phosphoglucomutase	767	syn	V->V	ko:K01835	PGM_PMM_I,PGM_PMM_II,PGM_PMM_III,PGM_PMM_IV	-	-	-	-	-	-	-	-
43	AAQ_6	AAQ_6_117	AAQ	k77_422389	1125	sub_T	134	no_sweep	0	AAQ_g66414_2	in	UniRef100_A0A174NU75	100	Phosphoglucomutase	782	syn	Y->Y	ko:K01835	PGM_PMM_I,PGM_PMM_II,PGM_PMM_III,PGM_PMM_IV	-	-	-	-	-	-	-	-
43	AAQ_6	AAQ_6_118	AAQ	k77_422389	1161	sub_C	134	no_sweep	0	AAQ_g66414_2	in	UniRef100_A0A174NU75	100	Phosphoglucomutase	818	syn	N->N	ko:K01835	PGM_PMM_I,PGM_PMM_II,PGM_PMM_III,PGM_PMM_IV	-	-	-	-	-	-	-	-
43	AAQ_6	AAQ_6_119	AAQ	k77_440172	2654	sub_C	134	no_sweep	0	AAQ_g4828_3	in	UniRef100_A0A174JHU8	100	Thiamine-phosphate synthase	173	non_syn	Li->L	ko:K00788	TMP-TENI	-	-	-	-	-	-	-	-
43	AAQ_6	AAQ_6_120	AAQ	k77_442704	2345	sub_T	134	no_sweep	0	AAQ_g45897_4	in	UniRef100_A0A174SMC1	99.8	Predicted AAA-ATPase	659	syn	Ii->Ii	-	AAA-ATPase_like,PDDEXK_9	-	-	-	-	-	-	-	-
43	AAQ_6	AAQ_6_121	AAQ	k77_442914	8440	sub_G	134	no_sweep	0	AAQ_g49521_7	in	UniRef100_A0A396PFR0	98.3	Uncharacterized protein	715	non_syn	T->Mi	-	-	-	-	-	-	-	-	-	-
43	AAQ_6	AAQ_6_122	AAQ	k77_447817	3256	sub_A	134	no_sweep	0	-	-	-	-	-	-	-	-			-	-	-	-	-	-	-	-
43	AAQ_6	AAQ_6_123	AAQ	k77_447817	3302	sub_A	134	no_sweep	0	-	-	-	-	-	-	-	-			-	-	-	-	-	-	-	-
43	AAQ_6	AAQ_6_124	AAQ	k77_463248	234	sub_C	134	no_sweep	0	AAQ_g19134_1	in	UniRef100_A0A174IQ58	44.866	Acetyl esterase	233	syn	T->T	-	Abhydrolase_3,Peptidase_S9	-	-	-	-	-	-	-	-
43	AAQ_6	AAQ_6_125	AAQ	k77_46518	274	sub_T	134	no_sweep	0	AAQ_g33735_1	in	UniRef100_A0A174GTF7	100	Fructose-1,6-bisphosphatase class 3	227	syn	G->G	ko:K04041	FBPase_2	-	-	-	-	-	-	-	-
43	AAQ_6	AAQ_6_126	AAQ	k77_46518	355	sub_T	134	no_sweep	0	AAQ_g33735_1	in	UniRef100_A0A174GTF7	100	Fructose-1,6-bisphosphatase class 3	308	syn	D->D	ko:K04041	FBPase_2	-	-	-	-	-	-	-	-
43	AAQ_6	AAQ_6_127	AAQ	k77_46518	892	sub_C	134	no_sweep	0	AAQ_g33735_1	in	UniRef100_A0A174GTF7	100	Fructose-1,6-bisphosphatase class 3	845	syn	C->C	ko:K04041	FBPase_2	-	-	-	-	-	-	-	-
43	AAQ_6	AAQ_6_128	AAQ	k77_54743	458	sub_G	134	no_sweep	0	AAQ_g45946_1	in	UniRef100_A0A417MKR3	68.364	Aminoglycoside phosphotransferase family protein	308	syn	A->A	-	APH	-	-	-	-	-	-	-	-
43	AAQ_6	AAQ_6_129	AAQ	k77_70038	389	sub_C	134	no_sweep	0	AAQ_g56759_1	in	UniRef100_A0A373P982	63.917	MBL fold metallo-hydrolase	170	syn	R->R	-	Lactamase_B_2	-	-	-	-	-	-	-	-
43	AAQ_6	AAQ_6_130	AAQ	k77_92059	1446	sub_G	134	no_sweep	0	AAQ_g61457_2	in	UniRef100_A0A174T0R5	99.7	Periplasmic beta-glucosidase	278	syn	S->S	ko:K05349	Fn3-like,Glyco_hydro_3,Glyco_hydro_3_C	-	-	-	-	-	-	-	-
43	AAQ_6	AAQ_6_131	AAQ	k77_92059	2271	sub_T	134	no_sweep	0	AAQ_g61457_2	in	UniRef100_A0A174T0R5	99.7	Periplasmic beta-glucosidase	1103	syn	N->N	ko:K05349	Fn3-like,Glyco_hydro_3,Glyco_hydro_3_C	-	-	-	-	-	-	-	-
43	AAQ_6	AAQ_6_132	AAQ	k77_97316	1790	sub_G	134	no_sweep	0	AAQ_g27368_4	in	UniRef100_A0A173WGF2	100	Metallo-beta-lactamase superfamily	360	non_syn	R->W	ko:K13075	Lactamase_B,Lactamase_B_2	-	-	-	-	-	-	-	-
43	AAQ_6	AAQ_6_133	AAQ	k77_97316	3140	sub_G	134	no_sweep	0	AAQ_g27368_5	in	UniRef100_A0A173WF25	100	1,4-alpha-glucan branching enzyme GlgB	1094	syn	L->L	ko:K00700	Alpha-amylase,Alpha-amylase_C,CBM_48	-	-	-	-	-	-	-	-
43	AAQ_6	AAQ_6_134	AAQ	k77_98775	2135	sub_T	134	no_sweep	0	AAQ_g53392_2	in	UniRef100_A0A174UH13	100	L-fucose isomerase and related proteins	1109	syn	T->T	-	Fucose_iso_C	-	-	-	-	-	-	-	-
44	AAQ_7	AAQ_7_1	AAQ	k77_105516	10132	sub_G	130	no_sweep	0	AAQ_g43004_7	in	UniRef100_A0A139KHF6	100	AraC family transcriptional regulator	698	syn	Y->Y	ko:K13652	GyrI-like,HTH_18	-	-	-	-	-	-	-	-
44	AAQ_7	AAQ_7_2	AAQ	k77_122638	29663	sub_C	130	no_sweep	0	AAQ_g75234_23	in	UniRef100_A0A3A5X3I1	99.5	TolC family protein	1049	syn	K->K	-	OEP	-	-	-	-	-	-	-	-
44	AAQ_7	AAQ_7_3	AAQ	k77_122638	29668	sub_T	130	no_sweep	0	AAQ_g75234_23	in	UniRef100_A0A3A5X3I1	99.5	TolC family protein	1044	syn	R->R	-	OEP	-	-	-	-	-	-	-	-
44	AAQ_7	AAQ_7_4	AAQ	k77_143347	15381	sub_A	130	no_sweep	0	AAQ_g56945_16	in	UniRef100_E5VEJ2	98.8	AhpC/TSA family protein	376	non_syn	T->Ii	-	AhpC-TSA,Redoxin	-	-	-	-	-	-	-	-
44	AAQ_7	AAQ_7_5	AAQ	k77_169454	1343	sub_C	130	no_sweep	0	AAQ_g12321_3	in	UniRef100_A0A174QGH1	100	ABC transporter permease	959	syn	R->R	ko:K09808,ko:K09815	FtsX,MacB_PCD	-	-	-	-	-	-	-	-
44	AAQ_7	AAQ_7_6	AAQ	k77_169454	1349	sub_A	130	no_sweep	0	AAQ_g12321_3	in	UniRef100_A0A174QGH1	100	ABC transporter permease	953	syn	D->D	ko:K09808,ko:K09815	FtsX,MacB_PCD	-	-	-	-	-	-	-	-
44	AAQ_7	AAQ_7_7	AAQ	k77_169454	1379	sub_G	130	no_sweep	0	AAQ_g12321_3	in	UniRef100_A0A174QGH1	100	ABC transporter permease	923	syn	D->D	ko:K09808,ko:K09815	FtsX,MacB_PCD	-	-	-	-	-	-	-	-
44	AAQ_7	AAQ_7_8	AAQ	k77_169454	2288	sub_G	130	no_sweep	0	AAQ_g12321_3	in	UniRef100_A0A174QGH1	100	ABC transporter permease	14	syn	F->F	ko:K09808,ko:K09815	FtsX,MacB_PCD	-	-	-	-	-	-	-	-
44	AAQ_7	AAQ_7_9	AAQ	k77_169454	4121	sub_T	130	no_sweep	0	AAQ_g12321_5	in	UniRef100_A0A412MQ09	100	Uncharacterized protein	1718	non_syn	Li->L	-	YfhO	-	-	-	-	-	-	-	-
44	AAQ_7	AAQ_7_10	AAQ	k77_171250	493	sub_G	130	no_sweep	0	AAQ_g37113_1	in	UniRef100_A0A174ND79	100	His Kinase A (Phosphoacceptor) domain./Histidine kinase-, DNA gyrase B-, and HSP90-like ATPase	2111	syn	D->D	-	HATPase_c,HisKA	-	-	-	-	-	-	-	-
44	AAQ_7	AAQ_7_11	AAQ	k77_171521	13148	sub_A	130	no_sweep	0	AAQ_g41617_12	in	UniRef100_I9U131	100	TonB-dependent receptor	2417	syn	G->G	-	CarbopepD_reg_2,OMP_b-brl_3,Plug,TonB_dep_Rec	-	-	-	-	-	-	-	-
44	AAQ_7	AAQ_7_12	AAQ	k77_186552	15555	sub_T	130	no_sweep	0	AAQ_g44281_16	in	UniRef100_A0A374PZ14	99.539	Biopolymer transporter ExbD	34	non_syn	G->D	-	ExbD	-	-	-	-	-	-	-	-
44	AAQ_7	AAQ_7_13	AAQ	k77_187624	5032	sub_G	130	no_sweep	0	AAQ_g59313_7	in	UniRef100_A0A078S1E6	99.8	Myo-inositol-1-phosphate synthase family protein	842	syn	L->L	ko:K01858	Inos-1-P_synth,NAD_binding_5	-	-	-	-	-	-	-	-
44	AAQ_7	AAQ_7_14	AAQ	k77_196109	1514	sub_G	130	no_sweep	0	AAQ_g78899_2	in	UniRef100_R7ED22	100	ATPase/histidine kinase/DNA gyrase B/HSP90 domain protein	1128	non_syn	R->G	-	HATPase_c,HTH_18,HisKA,Reg_prop,Response_reg,Y_Y_Y	-	-	-	-	-	-	-	-
44	AAQ_7	AAQ_7_15	AAQ	k77_228682	1417	sub_T	130	no_sweep	0	AAQ_g19528_3	in	UniRef100_A0A174NTZ9	100	Acetyl-CoA hydrolase/transferase family protein	506	syn	G->G	ko:K01067,ko:K18118	AcetylCoA_hyd_C,AcetylCoA_hydro	-	-	-	-	-	-	-	-
44	AAQ_7	AAQ_7_16	AAQ	k77_228682	2086	sub_C	130	no_sweep	0	AAQ_g19528_3	in	UniRef100_A0A174NTZ9	100	Acetyl-CoA hydrolase/transferase family protein	1175	syn	T->T	ko:K01067,ko:K18118	AcetylCoA_hyd_C,AcetylCoA_hydro	-	-	-	-	-	-	-	-
44	AAQ_7	AAQ_7_17	AAQ	k77_228682	2757	sub_G	130	no_sweep	0	AAQ_g19528_3	downstream	UniRef100_A0A174NTZ9	100	Acetyl-CoA hydrolase/transferase family protein	1846	undefined	undefined	ko:K01067,ko:K18118	AcetylCoA_hyd_C,AcetylCoA_hydro	AAQ_g19528_4	downstream	UniRef100_A0A412MMY1	100	TolC family protein	1488	undefined	undefined	-	OEP
44	AAQ_7	AAQ_7_18	AAQ	k77_228682	2765	ins_C	130	no_sweep	0	AAQ_g19528_3	downstream	UniRef100_A0A174NTZ9	100	Acetyl-CoA hydrolase/transferase family protein	1854	undefined	undefined	ko:K01067,ko:K18118	AcetylCoA_hyd_C,AcetylCoA_hydro	AAQ_g19528_4	downstream	UniRef100_A0A412MMY1	100	TolC family protein	1480	undefined	undefined	-	OEP
44	AAQ_7	AAQ_7_19	AAQ	k77_228682	2781	sub_A	130	no_sweep	0	AAQ_g19528_3	downstream	UniRef100_A0A174NTZ9	100	Acetyl-CoA hydrolase/transferase family protein	1870	undefined	undefined	ko:K01067,ko:K18118	AcetylCoA_hyd_C,AcetylCoA_hydro	AAQ_g19528_4	downstream	UniRef100_A0A412MMY1	100	TolC family protein	1464	undefined	undefined	-	OEP
44	AAQ_7	AAQ_7_20	AAQ	k77_231187	3311	sub_G	130	no_sweep	0	AAQ_g53114_4	in	UniRef100_A0A139JUC3	100	AraC family transcriptional regulator	770	syn	S->S	-	AraC_binding,HTH_18	-	-	-	-	-	-	-	-
44	AAQ_7	AAQ_7_21	AAQ	k77_239481	6249	sub_C	130	no_sweep	0	AAQ_g65363_6	in	UniRef100_A0A139K1G3	76.861	Signal peptidase I	317	syn	Y->Y	ko:K03100	Peptidase_S24,Peptidase_S26	-	-	-	-	-	-	-	-
44	AAQ_7	AAQ_7_22	AAQ	k77_249914	2507	sub_A	130	no_sweep	0	AAQ_g10559_3	in	UniRef100_A0A139K5Q1	100	MFS transporter	645	syn	Li->Li	-	MFS_1,MFS_1_like,Sugar_tr	-	-	-	-	-	-	-	-
44	AAQ_7	AAQ_7_23	AAQ	k77_252736	287	del_1	130	no_sweep	0	AAQ_g58093_1	downstream	UniRef100_UPI0012313475	20.687	ATP-binding protein	286	undefined	undefined	-	AlbA_2	AAQ_g58093_2	upstream	UniRef100_A0A139K5N9	100	Alanine:cation symporter family protein	-38	undefined	undefined	ko:K03310	Na_Ala_symp
44	AAQ_7	AAQ_7_24	AAQ	k77_272651	2624	sub_T	130	no_sweep	0	AAQ_g17939_3	in	UniRef100_E5VEL8	100	AI-2E family transporter	230	syn	P->P	-	AI-2E_transport	-	-	-	-	-	-	-	-
44	AAQ_7	AAQ_7_25	AAQ	k77_272651	2632	sub_A	130	no_sweep	0	AAQ_g17939_3	in	UniRef100_E5VEL8	100	AI-2E family transporter	222	syn	Li->Li	-	AI-2E_transport	-	-	-	-	-	-	-	-
44	AAQ_7	AAQ_7_26	AAQ	k77_28950	1909	sub_T	130	no_sweep	0	AAQ_g98059_2	in	UniRef100_A0A1Q6HT08	99.9	SusC/RagA family protein	599	syn	Ii->Ii	-	CarbopepD_reg_2,Plug,TonB_dep_Rec	-	-	-	-	-	-	-	-
44	AAQ_7	AAQ_7_27	AAQ	k77_325136	29710	sub_A	130	no_sweep	0	AAQ_g42923_27	in	UniRef100_A0A1Q6IFT7	100	Class I SAM-dependent methyltransferase	218	syn	R->R	-	Methyltransf_11,Methyltransf_23,Methyltransf_31	-	-	-	-	-	-	-	-
44	AAQ_7	AAQ_7_28	AAQ	k77_342728	23489	sub_G	130	no_sweep	0	AAQ_g82102_25	in	UniRef100_R7EHT0	100	Sulfatase	287	non_syn	L->Li	ko:K07014	DUF3413,Sulfatase	-	-	-	-	-	-	-	-
44	AAQ_7	AAQ_7_29	AAQ	k77_34616	9558	sub_T	130	no_sweep	0	AAQ_g79319_10	in	UniRef100_A0A374N8L0	100	ABC transporter ATP-binding protein	248	syn	R->R	ko:K02013	ABC_tran	-	-	-	-	-	-	-	-
44	AAQ_7	AAQ_7_30	AAQ	k77_34616	9591	sub_C	130	no_sweep	0	AAQ_g79319_10	in	UniRef100_A0A374N8L0	100	ABC transporter ATP-binding protein	281	syn	D->D	ko:K02013	ABC_tran	-	-	-	-	-	-	-	-
44	AAQ_7	AAQ_7_31	AAQ	k77_347645	11548	sub_G	130	no_sweep	0	AAQ_g48669_14	in	UniRef100_A0A412MP18	100	Glycosyltransferase	965	syn	A->A	-	Glyco_trans_2_3,Glycos_transf_2	-	-	-	-	-	-	-	-
44	AAQ_7	AAQ_7_32	AAQ	k77_347645	17517	sub_A	130	no_sweep	0	AAQ_g48669_20	upstream	UniRef100_A0A374Q634	100	Alkaline phosphatase	-53	undefined	undefined	ko:K01077	Alk_phosphatase	AAQ_g48669_21	downstream	UniRef100_A0A374MRR3	100	Acetate kinase	1324	undefined	undefined	ko:K00925	Acetate_kinase
44	AAQ_7	AAQ_7_33	AAQ	k77_372442	1656	sub_A	130	no_sweep	0	AAQ_g84694_2	in	UniRef100_A0A139KGS2	100	Heme chaperone HemW	59	syn	F->F	-	HemN_C,Radical_SAM	-	-	-	-	-	-	-	-
44	AAQ_7	AAQ_7_34	AAQ	k77_383768	7467	sub_G	130	no_sweep	0	AAQ_g36318_7	in	UniRef100_A0A174FS40	100	Alkyl hydroperoxide reductase	902	syn	E->E	ko:K03387	Pyr_redox_2,Thioredoxin_3	-	-	-	-	-	-	-	-
44	AAQ_7	AAQ_7_35	AAQ	k77_384240	3965	sub_G	130	no_sweep	0	AAQ_g43010_4	in	UniRef100_A0A139JYP9	100	Anaerobic ribonucleoside-triphosphate reductase	1013	syn	Q->Q	ko:K21636	ATP-cone,NRDD	-	-	-	-	-	-	-	-
44	AAQ_7	AAQ_7_36	AAQ	k77_386684	4117	sub_A	130	no_sweep	0	AAQ_g80100_3	in	UniRef100_A0A412MIP3	100	Ribulokinase	1590	non_syn	L->Ii	ko:K00853	FGGY_C,FGGY_N	-	-	-	-	-	-	-	-
44	AAQ_7	AAQ_7_37	AAQ	k77_389557	28888	sub_A	130	no_sweep	0	AAQ_g15129_21	in	UniRef100_A0A285RUR3	100	Signal transduction histidine kinase	1847	syn	P->P	-	HATPase_c,HTH_18,HisKA,Reg_prop,Response_reg,Y_Y_Y	-	-	-	-	-	-	-	-
44	AAQ_7	AAQ_7_38	AAQ	k77_397856	3380	sub_C	130	no_sweep	0	AAQ_g27856_5	in	UniRef100_A0A174FNQ3	97.814	Alpha-glucosidase	167	syn	F->F	ko:K01811	DUF4968,Gal_mutarotas_2,Glyco_hydro_31	-	-	-	-	-	-	-	-
44	AAQ_7	AAQ_7_39	AAQ	k77_397856	3416	sub_T	130	no_sweep	0	AAQ_g27856_5	in	UniRef100_A0A174FNQ3	97.814	Alpha-glucosidase	203	syn	G->G	ko:K01811	DUF4968,Gal_mutarotas_2,Glyco_hydro_31	-	-	-	-	-	-	-	-
44	AAQ_7	AAQ_7_40	AAQ	k77_397856	3419	sub_A	130	no_sweep	0	AAQ_g27856_5	in	UniRef100_A0A174FNQ3	97.814	Alpha-glucosidase	206	syn	K->K	ko:K01811	DUF4968,Gal_mutarotas_2,Glyco_hydro_31	-	-	-	-	-	-	-	-
44	AAQ_7	AAQ_7_41	AAQ	k77_414765	236	sub_T	130	no_sweep	0	AAQ_g58135_1	in	UniRef100_A0A139K0Y0	80.108	Ribosome-binding ATPase YchF	648	non_syn	G->S	ko:K06942	MMR_HSR1,YchF-GTPase_C	-	-	-	-	-	-	-	-
44	AAQ_7	AAQ_7_42	AAQ	k77_414765	276	sub_G	130	no_sweep	0	AAQ_g58135_1	in	UniRef100_A0A139K0Y0	80.108	Ribosome-binding ATPase YchF	608	syn	P->P	ko:K06942	MMR_HSR1,YchF-GTPase_C	-	-	-	-	-	-	-	-
44	AAQ_7	AAQ_7_43	AAQ	k77_416831	18634	sub_C	130	no_sweep	0	AAQ_g87740_21	in	UniRef100_A0A139K9W7	100	Nucleoside kinase	1493	syn	F->F	ko:K00876	PRK	-	-	-	-	-	-	-	-
44	AAQ_7	AAQ_7_44	AAQ	k77_431380	4144	sub_T	130	no_sweep	0	AAQ_g87436_5	in	UniRef100_A0A3E5BBU8	100	4-hydroxy-3-methylbut-2-en-1-yl diphosphate synthase (flavodoxin)	944	syn	A->A	ko:K03526	GcpE	-	-	-	-	-	-	-	-
44	AAQ_7	AAQ_7_45	AAQ	k77_432753	40420	sub_G	130	no_sweep	0	AAQ_g3303_22	in	UniRef100_A0A412MR91	100	MBOAT family protein	132	non_syn	T->A	-	MBOAT	-	-	-	-	-	-	-	-
44	AAQ_7	AAQ_7_46	AAQ	k77_443204	5537	sub_T	130	no_sweep	0	AAQ_g53422_6	in	UniRef100_A0A412MMY8	100	FAD-binding oxidoreductase	239	syn	G->G	ko:K18930	CCG,FAD-oxidase_C,FAD_binding_4,Fer4_17,Fer4_7,Fer4_8	-	-	-	-	-	-	-	-
44	AAQ_7	AAQ_7_47	AAQ	k77_454967	11091	sub_C	130	no_sweep	0	AAQ_g5996_10	in	UniRef100_A0A139JT37	100	Hydrolase, P-loop family	86	syn	A->A	ko:K06925	TsaE	-	-	-	-	-	-	-	-
44	AAQ_7	AAQ_7_48	AAQ	k77_454967	11094	sub_C	130	no_sweep	0	AAQ_g5996_10	in	UniRef100_A0A139JT37	100	Hydrolase, P-loop family	89	syn	L->L	ko:K06925	TsaE	-	-	-	-	-	-	-	-
44	AAQ_7	AAQ_7_49	AAQ	k77_454967	11121	sub_G	130	no_sweep	0	AAQ_g5996_10	in	UniRef100_A0A139JT37	100	Hydrolase, P-loop family	116	syn	T->T	ko:K06925	TsaE	-	-	-	-	-	-	-	-
44	AAQ_7	AAQ_7_50	AAQ	k77_4951	2183	sub_T	130	no_sweep	0	AAQ_g64097_4	in	UniRef100_A0A1T4IY75	100	Inner membrane protein YqaA	270	non_syn	E->K	-	SNARE_assoc	-	-	-	-	-	-	-	-
44	AAQ_7	AAQ_7_51	AAQ	k77_4951	10497	sub_A	130	no_sweep	0	AAQ_g64097_10	in	UniRef100_A0A1Q6IE79	100	Cysteine synthase	601	non_syn	R->K	ko:K01738	PALP	-	-	-	-	-	-	-	-
44	AAQ_7	AAQ_7_52	AAQ	k77_4951	10624	sub_T	130	no_sweep	0	AAQ_g64097_10	in	UniRef100_A0A1Q6IE79	100	Cysteine synthase	728	non_syn	Vi->V	ko:K01738	PALP	-	-	-	-	-	-	-	-
44	AAQ_7	AAQ_7_53	AAQ	k77_4951	10629	sub_A	130	no_sweep	0	AAQ_g64097_10	in	UniRef100_A0A1Q6IE79	100	Cysteine synthase	733	non_syn	Li->Q	ko:K01738	PALP	-	-	-	-	-	-	-	-
44	AAQ_7	AAQ_7_54	AAQ	k77_96697	11292	sub_A	130	no_sweep	0	AAQ_g18299_10	upstream	UniRef100_A0A173WT28	100	4-alpha-glucanotransferase	-19	undefined	undefined	ko:K00705	CBM_20,Glyco_hydro_77	AAQ_g18299_11	downstream	UniRef100_A0A173WTJ5	100	Vitamin B12-dependent ribonucleotide reductase	2650	undefined	undefined	ko:K00525	Ribonuc_red_lgC,Ribonuc_red_lgN
44	AAQ_7	AAQ_7_55	AAQ	k77_111286	2767	sub_T	130	no_sweep	0	AAQ_g19758_2	in	UniRef100_A0A139K0U2	100	Uncharacterized protein	263	syn	A->A	-	-	-	-	-	-	-	-	-	-
44	AAQ_7	AAQ_7_56	AAQ	k77_122638	4465	sub_G	130	no_sweep	0	AAQ_g75234_4	in	UniRef100_A0A173Z496	100	Uncharacterized protein	923	non_syn	V->Vi	-	PD40	-	-	-	-	-	-	-	-
44	AAQ_7	AAQ_7_57	AAQ	k77_129921	1432	sub_C	130	no_sweep	0	AAQ_g77706_1	in	UniRef100_A0A412MUH9	98.28	Sodium:proton antiporter	797	syn	R->R	ko:K03455	Na_H_Exchanger,TrkA_C	-	-	-	-	-	-	-	-
44	AAQ_7	AAQ_7_58	AAQ	k77_138321	1206	sub_T	130	no_sweep	0	AAQ_g88687_1	in	UniRef100_A0A412MNK1	100	Glycoside hydrolase	911	syn	G->G	ko:K03931	Glyco_hydro_63,Trehalase	-	-	-	-	-	-	-	-
44	AAQ_7	AAQ_7_59	AAQ	k77_143347	6868	sub_T	130	no_sweep	0	AAQ_g56945_8	in	UniRef100_A0A1Q6I9P6	100	Orotidine 5'-phosphate decarboxylase	275	syn	Ii->Ii	ko:K01591	OMPdecase	-	-	-	-	-	-	-	-
44	AAQ_7	AAQ_7_60	AAQ	k77_169454	2428	sub_A	130	no_sweep	0	AAQ_g12321_4	in	UniRef100_A0A139K2N8	100	Ribosome-binding factor A	215	syn	N->N	ko:K02834	RBFA	-	-	-	-	-	-	-	-
44	AAQ_7	AAQ_7_61	AAQ	k77_171521	16795	sub_T	130	no_sweep	0	AAQ_g41617_13	in	UniRef100_A0A412MRK5	100	SAM-dependent methyltransferase	291	non_syn	D->N	-	Cons_hypoth95,PCMT	-	-	-	-	-	-	-	-
44	AAQ_7	AAQ_7_62	AAQ	k77_186552	14048	sub_C	130	no_sweep	0	AAQ_g44281_14	in	UniRef100_A0A174G7Q8	100	Phosphate ABC transporter substrate-binding protein	35	non_syn	L->Li	ko:K02040	PBP_like_2	-	-	-	-	-	-	-	-
44	AAQ_7	AAQ_7_63	AAQ	k77_228682	4368	sub_C	130	no_sweep	0	AAQ_g19528_5	in	UniRef100_A0A4Y1VBS1	99.9	Multidrug transporter AcrB	3053	non_syn	L->Li	ko:K03296	ACR_tran	-	-	-	-	-	-	-	-
44	AAQ_7	AAQ_7_64	AAQ	k77_228682	11602	sub_T	130	no_sweep	0	AAQ_g19528_9	in	UniRef100_A0A1Q6HWC9	100	Peptidase_M1 domain-containing protein	155	syn	V->V	-	Peptidase_M1	-	-	-	-	-	-	-	-
44	AAQ_7	AAQ_7_65	AAQ	k77_235204	4531	sub_A	130	no_sweep	0	AAQ_g7812_2	in	UniRef100_A0A413NKK5	100	Glycosyl hydrolase	434	syn	R->R	ko:K05349	Fn3-like,Glyco_hydro_3,Glyco_hydro_3_C	-	-	-	-	-	-	-	-
44	AAQ_7	AAQ_7_66	AAQ	k77_235204	6474	sub_G	130	no_sweep	0	AAQ_g7812_3	in	UniRef100_A0A3A6C3R6	66.017	DUF4982 domain-containing protein	206	syn	G->G	ko:K01190	DUF4982,Glyco_hydro_2,Glyco_hydro_2_C,Glyco_hydro_2_N	-	-	-	-	-	-	-	-
44	AAQ_7	AAQ_7_67	AAQ	k77_252736	3750	sub_T	130	no_sweep	0	AAQ_g58093_4	in	UniRef100_A0A139K5E1	100	KamA family protein	1160	syn	N->N	ko:K01843	-	-	-	-	-	-	-	-	-
44	AAQ_7	AAQ_7_68	AAQ	k77_252736	3754	sub_C	130	no_sweep	0	AAQ_g58093_4	in	UniRef100_A0A139K5E1	100	KamA family protein	1164	syn	L->L	ko:K01843	-	-	-	-	-	-	-	-	-
44	AAQ_7	AAQ_7_69	AAQ	k77_252736	3756	sub_G	130	no_sweep	0	AAQ_g58093_4	in	UniRef100_A0A139K5E1	100	KamA family protein	1166	non_syn	L->Li	ko:K01843	-	-	-	-	-	-	-	-	-
44	AAQ_7	AAQ_7_70	AAQ	k77_25939	19788	sub_A	130	no_sweep	0	AAQ_g56929_14	in	UniRef100_A0A412MLM5	100	TolC family protein	695	non_syn	Vi->V	-	OEP	-	-	-	-	-	-	-	-
44	AAQ_7	AAQ_7_71	AAQ	k77_259500	1988	sub_A	130	no_sweep	0	AAQ_g40541_2	in	UniRef100_A0A139KHT4	100	3-isopropylmalate dehydratase large subunit	282	non_syn	A->T	ko:K01703	Aconitase	-	-	-	-	-	-	-	-
44	AAQ_7	AAQ_7_72	AAQ	k77_268636	28450	sub_T	130	no_sweep	0	AAQ_g79172_25	in	UniRef100_A0A139K3S3	99.8	UPF0313 protein B5G17_09335	1463	syn	F->F	-	DUF3362,Radical_SAM,Radical_SAM_N	-	-	-	-	-	-	-	-
44	AAQ_7	AAQ_7_73	AAQ	k77_28950	10976	sub_A	130	no_sweep	0	AAQ_g98059_7	in	UniRef100_A0A412MTA6	100	Esterase	158	syn	Q->Q	ko:K07214	CBM_48,Esterase	-	-	-	-	-	-	-	-
44	AAQ_7	AAQ_7_74	AAQ	k77_28950	10982	sub_T	130	no_sweep	0	AAQ_g98059_7	in	UniRef100_A0A412MTA6	100	Esterase	164	syn	T->T	ko:K07214	CBM_48,Esterase	-	-	-	-	-	-	-	-
44	AAQ_7	AAQ_7_75	AAQ	k77_293618	11821	sub_T	130	no_sweep	0	AAQ_g4099_11	in	UniRef100_A0A412MMF9	100	DNA helicase	131	syn	P->P	ko:K10742	AAA_11,AAA_12,PDDEXK_1	-	-	-	-	-	-	-	-
44	AAQ_7	AAQ_7_76	AAQ	k77_31910	8670	sub_T	130	no_sweep	0	AAQ_g43201_8	in	UniRef100_A0A412MJM6	100	Proline--tRNA ligase	770	non_syn	Vi->V	ko:K01881	HGTP_anticodon,ProRS-C_1,tRNA-synt_2b	-	-	-	-	-	-	-	-
44	AAQ_7	AAQ_7_77	AAQ	k77_323800	19572	sub_C	130	no_sweep	0	AAQ_g22142_15	in	UniRef100_A0A412MN24	100	Beta-N-acetylglucosaminidase	2465	syn	D->D	-	Beta-lactamase,Glyco_hydro_3,Glyco_hydro_3_C	-	-	-	-	-	-	-	-
44	AAQ_7	AAQ_7_78	AAQ	k77_323800	22277	sub_T	130	no_sweep	0	AAQ_g22142_18	in	UniRef100_A0A412MP88	100	Glycoside hydrolase family 97 protein	1580	syn	P->P	ko:K01187	GH97_C,GH97_N,Glyco_hydro_97	-	-	-	-	-	-	-	-
44	AAQ_7	AAQ_7_79	AAQ	k77_323800	25507	sub_T	130	no_sweep	0	AAQ_g22142_20	in	UniRef100_A0A3E4PRG6	100	Glycosyl transferase	1866	non_syn	E->K	ko:K00702	Glyco_hydro_36,Glyco_transf_36	-	-	-	-	-	-	-	-
44	AAQ_7	AAQ_7_80	AAQ	k77_324605	4560	sub_G	130	no_sweep	0	AAQ_g34871_3	in	UniRef100_A0A412MTB4	100	Glycoside hydrolase	2680	non_syn	N->S	-	Glyco_hydro_2,Glyco_hydro_2_C,Glyco_hydro_2_N	-	-	-	-	-	-	-	-
44	AAQ_7	AAQ_7_81	AAQ	k77_335977	2327	sub_T	130	no_sweep	0	AAQ_g79528_4	in	UniRef100_A0A174IN55	100	Peptidyl-prolyl cis-trans isomerase	335	non_syn	Vi->V	ko:K03772,ko:K03773	FKBP_C,FKBP_N	-	-	-	-	-	-	-	-
44	AAQ_7	AAQ_7_82	AAQ	k77_335977	2339	sub_T	130	no_sweep	0	AAQ_g79528_4	in	UniRef100_A0A174IN55	100	Peptidyl-prolyl cis-trans isomerase	323	syn	A->A	ko:K03772,ko:K03773	FKBP_C,FKBP_N	-	-	-	-	-	-	-	-
44	AAQ_7	AAQ_7_83	AAQ	k77_335977	2354	sub_A	130	no_sweep	0	AAQ_g79528_4	in	UniRef100_A0A174IN55	100	Peptidyl-prolyl cis-trans isomerase	308	syn	G->G	ko:K03772,ko:K03773	FKBP_C,FKBP_N	-	-	-	-	-	-	-	-
44	AAQ_7	AAQ_7_84	AAQ	k77_335977	2357	sub_G	130	no_sweep	0	AAQ_g79528_4	in	UniRef100_A0A174IN55	100	Peptidyl-prolyl cis-trans isomerase	305	non_syn	Vi->V	ko:K03772,ko:K03773	FKBP_C,FKBP_N	-	-	-	-	-	-	-	-
44	AAQ_7	AAQ_7_85	AAQ	k77_335977	3535	sub_A	130	no_sweep	0	AAQ_g79528_5	in	UniRef100_A0A396F5E0	100	NAD-dependent protein deacylase	690	non_syn	A->T	ko:K12410	SIR2	-	-	-	-	-	-	-	-
44	AAQ_7	AAQ_7_86	AAQ	k77_344493	1508	sub_T	130	no_sweep	0	AAQ_g102528_2	in	UniRef100_A0A412MP66	100	AcrB/AcrD/AcrF family protein	880	non_syn	A->Vi	-	ACR_tran	-	-	-	-	-	-	-	-
44	AAQ_7	AAQ_7_87	AAQ	k77_344493	3168	sub_C	130	no_sweep	0	AAQ_g102528_2	in	UniRef100_A0A412MP66	100	AcrB/AcrD/AcrF family protein	2540	syn	A->A	-	ACR_tran	-	-	-	-	-	-	-	-
44	AAQ_7	AAQ_7_88	AAQ	k77_347645	33380	sub_T	130	no_sweep	0	AAQ_g48669_36	in	UniRef100_A0A173X742	99.3	Outer membrane insertion signal domain-containing protein	1068	non_syn	H->Y	-	CarbopepD_reg_2,CarboxypepD_reg,OMP_b-brl_3	-	-	-	-	-	-	-	-
44	AAQ_7	AAQ_7_89	AAQ	k77_372442	9899	sub_A	130	no_sweep	0	AAQ_g84694_8	in	UniRef100_A0A174GWD1	100	Alpha-glucosidase	1874	non_syn	Li->L	-	GH97_C,GH97_N,Glyco_hydro_97	-	-	-	-	-	-	-	-
44	AAQ_7	AAQ_7_90	AAQ	k77_372442	9904	sub_G	130	no_sweep	0	AAQ_g84694_8	in	UniRef100_A0A174GWD1	100	Alpha-glucosidase	1879	non_syn	K->R	-	GH97_C,GH97_N,Glyco_hydro_97	-	-	-	-	-	-	-	-
44	AAQ_7	AAQ_7_91	AAQ	k77_372442	9917	sub_C	130	no_sweep	0	AAQ_g84694_8	in	UniRef100_A0A174GWD1	100	Alpha-glucosidase	1892	syn	D->D	-	GH97_C,GH97_N,Glyco_hydro_97	-	-	-	-	-	-	-	-
44	AAQ_7	AAQ_7_92	AAQ	k77_383063	4772	sub_G	130	no_sweep	0	AAQ_g27697_4	in	UniRef100_A0A174IPZ6	100	F5/8 type C domain	1304	syn	N->N	-	-	-	-	-	-	-	-	-	-
44	AAQ_7	AAQ_7_93	AAQ	k77_386684	4280	sub_T	130	no_sweep	0	AAQ_g80100_4	in	UniRef100_A0A139K0I1	100	DUF2961 domain-containing protein	84	syn	Li->Li	-	DUF2961	-	-	-	-	-	-	-	-
44	AAQ_7	AAQ_7_94	AAQ	k77_386684	4285	sub_A	130	no_sweep	0	AAQ_g80100_4	in	UniRef100_A0A139K0I1	100	DUF2961 domain-containing protein	89	non_syn	D->E	-	DUF2961	-	-	-	-	-	-	-	-
44	AAQ_7	AAQ_7_95	AAQ	k77_386684	4339	sub_T	130	no_sweep	0	AAQ_g80100_4	in	UniRef100_A0A139K0I1	100	DUF2961 domain-containing protein	143	syn	S->S	-	DUF2961	-	-	-	-	-	-	-	-
44	AAQ_7	AAQ_7_96	AAQ	k77_386684	4342	sub_C	130	no_sweep	0	AAQ_g80100_4	in	UniRef100_A0A139K0I1	100	DUF2961 domain-containing protein	146	syn	P->P	-	DUF2961	-	-	-	-	-	-	-	-
44	AAQ_7	AAQ_7_97	AAQ	k77_386684	4351	sub_C	130	no_sweep	0	AAQ_g80100_4	in	UniRef100_A0A139K0I1	100	DUF2961 domain-containing protein	155	syn	F->F	-	DUF2961	-	-	-	-	-	-	-	-
44	AAQ_7	AAQ_7_98	AAQ	k77_386684	4354	sub_G	130	no_sweep	0	AAQ_g80100_4	in	UniRef100_A0A139K0I1	100	DUF2961 domain-containing protein	158	syn	T->T	-	DUF2961	-	-	-	-	-	-	-	-
44	AAQ_7	AAQ_7_99	AAQ	k77_386684	4357	sub_T	130	no_sweep	0	AAQ_g80100_4	in	UniRef100_A0A139K0I1	100	DUF2961 domain-containing protein	161	syn	G->G	-	DUF2961	-	-	-	-	-	-	-	-
44	AAQ_7	AAQ_7_100	AAQ	k77_386684	4811	sub_T	130	no_sweep	0	AAQ_g80100_4	in	UniRef100_A0A139K0I1	100	DUF2961 domain-containing protein	615	syn	Li->Li	-	DUF2961	-	-	-	-	-	-	-	-
44	AAQ_7	AAQ_7_101	AAQ	k77_389359	18659	sub_G	130	no_sweep	0	AAQ_g11461_18	in	UniRef100_A0A412MM68	100	UDP-N-acetylenolpyruvoylglucosamine reductase	956	syn	D->D	ko:K00075	FAD_binding_4,MurB_C	-	-	-	-	-	-	-	-
44	AAQ_7	AAQ_7_102	AAQ	k77_389557	9513	sub_A	130	no_sweep	0	AAQ_g15129_9	in	UniRef100_A0A078S265	99.7	Patatin-like phospholipase family protein	1505	syn	G->G	ko:K07001	POTRA,Patatin	-	-	-	-	-	-	-	-
44	AAQ_7	AAQ_7_103	AAQ	k77_391375	6141	sub_T	130	no_sweep	0	AAQ_g42154_5	in	UniRef100_A0A412MM98	100	Uncharacterized protein	665	syn	P->P	-	-	-	-	-	-	-	-	-	-
44	AAQ_7	AAQ_7_104	AAQ	k77_40235	17953	sub_T	130	no_sweep	0	AAQ_g54316_7	in	UniRef100_A0A139K0Y4	100	Alpha-1,6-mannanase	980	syn	G->G	-	Glyco_hydro_76	-	-	-	-	-	-	-	-
44	AAQ_7	AAQ_7_105	AAQ	k77_41151	9062	sub_T	130	no_sweep	0	AAQ_g67829_7	in	UniRef100_A0A1Q6HZQ1	100	Phosphoenolpyruvate synthase	1112	syn	S->S	-	PPDK_N,Response_reg	-	-	-	-	-	-	-	-
44	AAQ_7	AAQ_7_106	AAQ	k77_418236	3983	sub_A	130	no_sweep	0	AAQ_g4821_5	in	UniRef100_A0A174APF9	100	Uncharacterized protein	542	syn	T->T	-	-	-	-	-	-	-	-	-	-
44	AAQ_7	AAQ_7_107	AAQ	k77_418236	8016	sub_G	130	no_sweep	0	AAQ_g4821_12	in	UniRef100_A0A174UT28	100	Urocanate hydratase	1061	syn	Q->Q	ko:K01712	Urocanase,Urocanase_C,Urocanase_N	-	-	-	-	-	-	-	-
44	AAQ_7	AAQ_7_108	AAQ	k77_418236	8024	sub_A	130	no_sweep	0	AAQ_g4821_12	in	UniRef100_A0A174UT28	100	Urocanate hydratase	1069	non_syn	R->H	ko:K01712	Urocanase,Urocanase_C,Urocanase_N	-	-	-	-	-	-	-	-
44	AAQ_7	AAQ_7_109	AAQ	k77_418236	8091	sub_G	130	no_sweep	0	AAQ_g4821_12	in	UniRef100_A0A174UT28	100	Urocanate hydratase	1136	syn	K->K	ko:K01712	Urocanase,Urocanase_C,Urocanase_N	-	-	-	-	-	-	-	-
44	AAQ_7	AAQ_7_110	AAQ	k77_418251	20044	sub_C	130	no_sweep	0	AAQ_g5569_16	in	UniRef100_A0A412MMJ7	100	ParB/RepB/Spo0J family partition protein	560	syn	A->A	ko:K03497	ParBc	-	-	-	-	-	-	-	-
44	AAQ_7	AAQ_7_111	AAQ	k77_418251	50971	sub_A	130	no_sweep	0	AAQ_g5569_39	in	UniRef100_E5VEV3	100	DUF4435 domain-containing protein	530	syn	T->T	-	DUF4435	-	-	-	-	-	-	-	-
44	AAQ_7	AAQ_7_112	AAQ	k77_431380	25728	sub_G	130	no_sweep	0	AAQ_g87436_18	in	UniRef100_A0A3E5BBV8	97.708	Uncharacterized protein	1265	syn	A->A	-	-	-	-	-	-	-	-	-	-
44	AAQ_7	AAQ_7_113	AAQ	k77_443204	2376	sub_G	130	no_sweep	0	AAQ_g53422_3	in	UniRef100_A0A412MPM1	100	SpoIID/LytB domain-containing protein	1214	syn	G->G	ko:K06381	DUF4922,Glycos_transf_2,SpoIID	-	-	-	-	-	-	-	-
44	AAQ_7	AAQ_7_114	AAQ	k77_454967	6182	ins_T	130	no_sweep	0	AAQ_g5996_4	in	UniRef100_I9TUV7	77.91	Chorismate_bind domain-containing protein	12	unknown	unknown	ko:K01665	Chorismate_bind	-	-	-	-	-	-	-	-
44	AAQ_7	AAQ_7_115	AAQ	k77_454967	8228	sub_A	130	no_sweep	0	AAQ_g5996_7	in	UniRef100_I9TVN8	100	3-phosphoshikimate 1-carboxyvinyltransferase	99	non_syn	A->T	ko:K00800	EPSP_synthase	-	-	-	-	-	-	-	-
44	AAQ_7	AAQ_7_116	AAQ	k77_454967	8603	sub_A	130	no_sweep	0	AAQ_g5996_7	in	UniRef100_I9TVN8	100	3-phosphoshikimate 1-carboxyvinyltransferase	474	non_syn	Q->K	ko:K00800	EPSP_synthase	-	-	-	-	-	-	-	-
44	AAQ_7	AAQ_7_117	AAQ	k77_457724	5369	sub_A	130	no_sweep	0	AAQ_g45517_6	in	UniRef100_A0A412MMG2	100	ATP-binding protein	641	syn	R->R	-	-	-	-	-	-	-	-	-	-
44	AAQ_7	AAQ_7_118	AAQ	k77_462787	5520	sub_A	130	no_sweep	0	AAQ_g13601_5	in	UniRef100_E5VF49	100	Fumarate hydratase class I	1578	syn	Li->Li	ko:K01676	Fumerase,Fumerase_C	-	-	-	-	-	-	-	-
44	AAQ_7	AAQ_7_119	AAQ	k77_462787	5524	sub_G	130	no_sweep	0	AAQ_g13601_5	in	UniRef100_E5VF49	100	Fumarate hydratase class I	1574	syn	F->F	ko:K01676	Fumerase,Fumerase_C	-	-	-	-	-	-	-	-
44	AAQ_7	AAQ_7_120	AAQ	k77_4951	1241	sub_T	130	no_sweep	0	AAQ_g64097_3	in	UniRef100_A0A1Q6IET3	100	SAM-dependent methyltransferase	570	non_syn	V->Ii	-	Methyltransf_30	-	-	-	-	-	-	-	-
44	AAQ_7	AAQ_7_121	AAQ	k77_4951	3083	sub_A	130	no_sweep	0	AAQ_g64097_5	in	UniRef100_A0A412MRH7	100	Uncharacterized protein	350	syn	A->A	-	-	-	-	-	-	-	-	-	-
44	AAQ_7	AAQ_7_122	AAQ	k77_4951	11888	sub_G	130	no_sweep	0	AAQ_g64097_12	in	UniRef100_E5V6Y3	100	Ribonuclease R	1805	syn	C->C	ko:K12573,ko:K12585	OB_RNB,RNB,S1	-	-	-	-	-	-	-	-
44	AAQ_7	AAQ_7_123	AAQ	k77_5688	7204	sub_T	130	no_sweep	0	AAQ_g73478_9	in	UniRef100_A0A174NUT3	99.3	tRNA-2-methylthio-N(6)-dimethylallyladenosine synthase	1148	non_syn	Li->L	ko:K06168	Radical_SAM,TRAM,UPF0004	-	-	-	-	-	-	-	-
44	AAQ_7	AAQ_7_124	AAQ	k77_5688	7408	sub_G	130	no_sweep	0	AAQ_g73478_9	in	UniRef100_A0A174NUT3	99.3	tRNA-2-methylthio-N(6)-dimethylallyladenosine synthase	944	syn	G->G	ko:K06168	Radical_SAM,TRAM,UPF0004	-	-	-	-	-	-	-	-
44	AAQ_7	AAQ_7_125	AAQ	k77_7702	12014	sub_A	130	no_sweep	0	AAQ_g6874_10	in	UniRef100_A0A412ML21	100	Metallophosphatase	581	syn	P->P	-	Metallophos	-	-	-	-	-	-	-	-
44	AAQ_7	AAQ_7_126	AAQ	k77_81747	19841	sub_G	130	no_sweep	0	AAQ_g17942_18	in	UniRef100_UPI0011070F18	94.141	alpha-galactosidase	1247	syn	K->K	ko:K07407	Glyco_hydro_36C,Glyco_hydro_36N,Melibiase	-	-	-	-	-	-	-	-
44	AAQ_7	AAQ_7_127	AAQ	k77_84488	22404	sub_T	130	no_sweep	0	AAQ_g60701_20	in	UniRef100_A0A3A5ZVB2	99.7	Dihydroxy-acid dehydratase	200	syn	K->K	ko:K01687	ILVD_EDD	-	-	-	-	-	-	-	-
44	AAQ_7	AAQ_7_128	AAQ	k77_8593	2248	sub_A	130	no_sweep	0	AAQ_g21337_4	in	UniRef100_A0A413XB69	100	TonB-dependent receptor	129	non_syn	A->T	-	CarbopepD_reg_2,OMP_b-brl_3	-	-	-	-	-	-	-	-
44	AAQ_7	AAQ_7_129	AAQ	k77_96637	602	sub_T	130	no_sweep	0	AAQ_g17065_1	in	UniRef100_A0A078RVC8	64.512	Tol-pal system protein YbgF	599	syn	R->R	-	TPR_16,TPR_2,TPR_21,TPR_6,TPR_8	-	-	-	-	-	-	-	-
44	AAQ_7	AAQ_7_130	AAQ	k77_96697	11244	sub_G	130	no_sweep	0	AAQ_g18299_10	in	UniRef100_A0A173WT28	100	4-alpha-glucanotransferase	29	syn	R->R	ko:K00705	CBM_20,Glyco_hydro_77	-	-	-	-	-	-	-	-
45	AAQ_8	AAQ_8_1	AAQ	k77_295685	6855	sub_C	2	no_sweep	0	AAQ_g37566_8	in	UniRef100_A0A374HI50	46.453	IS30 family transposase	17	syn	P->P	-	HTH_38	-	-	-	-	-	-	-	-
45	AAQ_8	AAQ_8_2	AAQ	k77_295685	7176	sub_T	2	no_sweep	0	AAQ_g37566_8	in	UniRef100_A0A374HI50	46.453	IS30 family transposase	338	syn	D->D	-	HTH_38	-	-	-	-	-	-	-	-
45	AAQ_8	AAQ_8_3	AAQ	k77_295685	6920	sub_A	16	no_sweep	0	AAQ_g37566_8	in	UniRef100_A0A374HI50	46.453	IS30 family transposase	82	non_syn	C->Y	-	HTH_38	-	-	-	-	-	-	-	-
45	AAQ_8	AAQ_8_4	AAQ	k77_295685	7050	sub_T	16	no_sweep	0	AAQ_g37566_8	in	UniRef100_A0A374HI50	46.453	IS30 family transposase	212	syn	H->H	-	HTH_38	-	-	-	-	-	-	-	-
45	AAQ_8	AAQ_8_5	AAQ	k77_295685	7062	sub_T	16	no_sweep	0	AAQ_g37566_8	in	UniRef100_A0A374HI50	46.453	IS30 family transposase	224	syn	C->C	-	HTH_38	-	-	-	-	-	-	-	-
45	AAQ_8	AAQ_8_6	AAQ	k77_295685	7075	sub_T	16	no_sweep	0	AAQ_g37566_8	in	UniRef100_A0A374HI50	46.453	IS30 family transposase	237	non_syn	A->S	-	HTH_38	-	-	-	-	-	-	-	-
45	AAQ_8	AAQ_8_7	AAQ	k77_295685	7144	sub_A	16	no_sweep	0	AAQ_g37566_8	in	UniRef100_A0A374HI50	46.453	IS30 family transposase	306	non_syn	D->N	-	HTH_38	-	-	-	-	-	-	-	-
45	AAQ_8	AAQ_8_8	AAQ	k77_312129	35407	sub_A	16	no_sweep	0	AAQ_g58092_31	in	UniRef100_A0A413Q447	98.7	GMP synthase [glutamine-hydrolyzing]	1076	syn	K->K	ko:K01951	GATase,GMP_synt_C,NAD_synthase,tRNA_Me_trans	-	-	-	-	-	-	-	-
45	AAQ_8	AAQ_8_9	AAQ	k77_312129	35410	sub_C	16	no_sweep	0	AAQ_g58092_31	in	UniRef100_A0A413Q447	98.7	GMP synthase [glutamine-hydrolyzing]	1079	syn	D->D	ko:K01951	GATase,GMP_synt_C,NAD_synthase,tRNA_Me_trans	-	-	-	-	-	-	-	-
45	AAQ_8	AAQ_8_10	AAQ	k77_312129	35533	sub_T	16	no_sweep	0	AAQ_g58092_31	in	UniRef100_A0A413Q447	98.7	GMP synthase [glutamine-hydrolyzing]	1202	syn	Ii->Ii	ko:K01951	GATase,GMP_synt_C,NAD_synthase,tRNA_Me_trans	-	-	-	-	-	-	-	-
45	AAQ_8	AAQ_8_11	AAQ	k77_312129	35539	sub_T	16	no_sweep	0	AAQ_g58092_31	in	UniRef100_A0A413Q447	98.7	GMP synthase [glutamine-hydrolyzing]	1208	syn	G->G	ko:K01951	GATase,GMP_synt_C,NAD_synthase,tRNA_Me_trans	-	-	-	-	-	-	-	-
45	AAQ_8	AAQ_8_12	AAQ	k77_312129	35542	sub_T	16	no_sweep	0	AAQ_g58092_31	in	UniRef100_A0A413Q447	98.7	GMP synthase [glutamine-hydrolyzing]	1211	non_syn	E->D	ko:K01951	GATase,GMP_synt_C,NAD_synthase,tRNA_Me_trans	-	-	-	-	-	-	-	-
45	AAQ_8	AAQ_8_13	AAQ	k77_312129	35587	sub_C	16	no_sweep	0	AAQ_g58092_31	in	UniRef100_A0A413Q447	98.7	GMP synthase [glutamine-hydrolyzing]	1256	syn	Ii->Ii	ko:K01951	GATase,GMP_synt_C,NAD_synthase,tRNA_Me_trans	-	-	-	-	-	-	-	-
45	AAQ_8	AAQ_8_14	AAQ	k77_312129	35591	sub_C	16	no_sweep	0	AAQ_g58092_31	in	UniRef100_A0A413Q447	98.7	GMP synthase [glutamine-hydrolyzing]	1260	syn	R->R	ko:K01951	GATase,GMP_synt_C,NAD_synthase,tRNA_Me_trans	-	-	-	-	-	-	-	-
45	AAQ_8	AAQ_8_15	AAQ	k77_312129	35593	sub_C	16	no_sweep	0	AAQ_g58092_31	in	UniRef100_A0A413Q447	98.7	GMP synthase [glutamine-hydrolyzing]	1262	non_syn	R->S	ko:K01951	GATase,GMP_synt_C,NAD_synthase,tRNA_Me_trans	-	-	-	-	-	-	-	-
45	AAQ_8	AAQ_8_16	AAQ	k77_312129	35596	sub_T	16	no_sweep	0	AAQ_g58092_31	in	UniRef100_A0A413Q447	98.7	GMP synthase [glutamine-hydrolyzing]	1265	syn	S->S	ko:K01951	GATase,GMP_synt_C,NAD_synthase,tRNA_Me_trans	-	-	-	-	-	-	-	-
45	AAQ_8	AAQ_8_17	AAQ	k77_312129	35632	sub_T	16	no_sweep	0	AAQ_g58092_31	in	UniRef100_A0A413Q447	98.7	GMP synthase [glutamine-hydrolyzing]	1301	syn	A->A	ko:K01951	GATase,GMP_synt_C,NAD_synthase,tRNA_Me_trans	-	-	-	-	-	-	-	-
45	AAQ_8	AAQ_8_18	AAQ	k77_454999	2825	sub_A	16	no_sweep	0	AAQ_g6335_3	in	UniRef100_UPI000E4FC2E1	56.669	molecular chaperone DnaK	356	syn	Ii->Ii	ko:K04043	HSP70	-	-	-	-	-	-	-	-
46	AAQ_9	AAQ_9_1	AAQ	k77_171730	826	sub_T	13	no_sweep	0	AAQ_g44883_2	upstream	UniRef100_A0A3D5WL44	100	BlaI/MecI/CopY family transcriptional regulator	-134	undefined	undefined	ko:K02171	Penicillinase_R	AAQ_g44883_3	upstream	UniRef100_R7K0H5	100	Uncharacterized protein	-86	undefined	undefined	-	-
46	AAQ_9	AAQ_9_2	AAQ	k77_199272	13042	sub_A	13	sweep	0	AAQ_g18338_12	upstream	UniRef100_A0A1Q6LQZ4	99.4	2-C-methyl-D-erythritol 2,4-cyclodiphosphate synthase	-356	undefined	undefined	ko:K01770,ko:K12506	IspD,YgbB	AAQ_g18338_13	downstream	UniRef100_A0A417RAR8	100	YdcF family protein	599	undefined	undefined	-	DUF218
46	AAQ_9	AAQ_9_3	AAQ	k77_110336	2122	sub_T	13	no_sweep	0	AAQ_g4456_2	in	UniRef100_A0A417RPH6	99.5	Uncharacterized protein	794	syn	Q->Q	-	-	-	-	-	-	-	-	-	-
46	AAQ_9	AAQ_9_4	AAQ	k77_110336	3049	sub_T	13	no_sweep	0	AAQ_g4456_3	in	UniRef100_A0A417Q6Q7	99.9	Penicillin-binding transpeptidase domain-containing protein	1997	syn	K->K	ko:K05515,ko:K21467	MecA_N,PBP_dimer,Transpeptidase	-	-	-	-	-	-	-	-
46	AAQ_9	AAQ_9_5	AAQ	k77_110336	3148	sub_C	13	no_sweep	0	AAQ_g4456_3	in	UniRef100_A0A417Q6Q7	99.9	Penicillin-binding transpeptidase domain-containing protein	1898	syn	G->G	ko:K05515,ko:K21467	MecA_N,PBP_dimer,Transpeptidase	-	-	-	-	-	-	-	-
46	AAQ_9	AAQ_9_6	AAQ	k77_110336	3205	sub_T	13	no_sweep	0	AAQ_g4456_3	in	UniRef100_A0A417Q6Q7	99.9	Penicillin-binding transpeptidase domain-containing protein	1841	non_syn	V->Vi	ko:K05515,ko:K21467	MecA_N,PBP_dimer,Transpeptidase	-	-	-	-	-	-	-	-
46	AAQ_9	AAQ_9_7	AAQ	k77_110336	3439	sub_G	13	no_sweep	0	AAQ_g4456_3	in	UniRef100_A0A417Q6Q7	99.9	Penicillin-binding transpeptidase domain-containing protein	1607	syn	S->S	ko:K05515,ko:K21467	MecA_N,PBP_dimer,Transpeptidase	-	-	-	-	-	-	-	-
46	AAQ_9	AAQ_9_8	AAQ	k77_110336	3461	sub_A	13	no_sweep	0	AAQ_g4456_3	in	UniRef100_A0A417Q6Q7	99.9	Penicillin-binding transpeptidase domain-containing protein	1585	non_syn	Mi->K	ko:K05515,ko:K21467	MecA_N,PBP_dimer,Transpeptidase	-	-	-	-	-	-	-	-
46	AAQ_9	AAQ_9_9	AAQ	k77_110336	5410	sub_T	13	no_sweep	0	AAQ_g4456_4	in	UniRef100_A0A3R6W4M1	98.5	Uncharacterized protein	425	syn	T->T			-	-	-	-	-	-	-	-
46	AAQ_9	AAQ_9_10	AAQ	k77_21618	2587	sub_G	13	no_sweep	0	AAQ_g101411_3	in	UniRef100_A0A417JBM7	99	ABC transporter ATP-binding protein	738	non_syn	Q->K	-	ABC_tran	-	-	-	-	-	-	-	-
46	AAQ_9	AAQ_9_11	AAQ	k77_21618	2588	sub_A	13	no_sweep	0	AAQ_g101411_3	in	UniRef100_A0A417JBM7	99	ABC transporter ATP-binding protein	737	syn	A->A	-	ABC_tran	-	-	-	-	-	-	-	-
46	AAQ_9	AAQ_9_12	AAQ	k77_21618	3023	sub_C	13	no_sweep	0	AAQ_g101411_3	in	UniRef100_A0A417JBM7	99	ABC transporter ATP-binding protein	302	syn	P->P	-	ABC_tran	-	-	-	-	-	-	-	-
46	AAQ_9	AAQ_9_13	AAQ	k77_325884	1575	sub_T	13	no_sweep	0	AAQ_g53353_2	in	UniRef100_A0A413Q1Q7	99.6	Winged helix-turn-helix transcriptional regulator	854	syn	Ii->Ii	-	AlbA_2,HATPase_c_4,HTH_11,HTH_24	-	-	-	-	-	-	-	-
46	AAQ_9	AAQ_9_14	AAQ	k77_38852	11729	sub_T	4	no_sweep	0	AAQ_g35604_11	in	UniRef100_A0A173TD08	58.287	HTH-type transcriptional regulator AdhR	20	syn	P->P	-	MerR,MerR_1	-	-	-	-	-	-	-	-
46	AAQ_9	AAQ_9_15	AAQ	k77_325884	1511	sub_G	4	no_sweep	0	AAQ_g53353_2	in	UniRef100_A0A413Q1Q7	99.6	Winged helix-turn-helix transcriptional regulator	918	syn	R->R	-	AlbA_2,HATPase_c_4,HTH_11,HTH_24	-	-	-	-	-	-	-	-
46	AAQ_9	AAQ_9_16	AAQ	k77_325884	1515	sub_A	4	no_sweep	0	AAQ_g53353_2	in	UniRef100_A0A413Q1Q7	99.6	Winged helix-turn-helix transcriptional regulator	914	syn	S->S	-	AlbA_2,HATPase_c_4,HTH_11,HTH_24	-	-	-	-	-	-	-	-
46	AAQ_9	AAQ_9_17	AAQ	k77_325884	1521	sub_A	4	no_sweep	0	AAQ_g53353_2	in	UniRef100_A0A413Q1Q7	99.6	Winged helix-turn-helix transcriptional regulator	908	syn	V->V	-	AlbA_2,HATPase_c_4,HTH_11,HTH_24	-	-	-	-	-	-	-	-
47	AAQ_11	AAQ_11_1	AAQ	k77_296230	4977	sub_T	3	no_sweep	0	AAQ_g44433_7	in	UniRef100_A0A350VWV2	97.624	Uncharacterized protein	1244	syn	V->V			-	-	-	-	-	-	-	-
47	AAQ_11	AAQ_11_2	AAQ	k77_296230	5709	sub_G	3	no_sweep	0	AAQ_g44433_7	in	UniRef100_A0A350VWV2	97.624	Uncharacterized protein	512	syn	A->A			-	-	-	-	-	-	-	-
47	AAQ_11	AAQ_11_3	AAQ	k77_288287	9028	sub_C	3	no_sweep	0	AAQ_g32610_9	in	UniRef100_A0A173VME9	97.435	Transposase domain (DUF772)	973	non_syn	E->G	-	DDE_Tnp_1,DDE_Tnp_1_6,DUF772	-	-	-	-	-	-	-	-
47	AAQ_11	AAQ_11_4	AAQ	k77_288287	8973	sub_A	4	no_sweep	0	AAQ_g32610_9	in	UniRef100_A0A173VME9	97.435	Transposase domain (DUF772)	1028	syn	T->T	-	DDE_Tnp_1,DDE_Tnp_1_6,DUF772	-	-	-	-	-	-	-	-
47	AAQ_11	AAQ_11_5	AAQ	k77_288287	8974	sub_A	4	no_sweep	0	AAQ_g32610_9	in	UniRef100_A0A173VME9	97.435	Transposase domain (DUF772)	1027	non_syn	T->Ii	-	DDE_Tnp_1,DDE_Tnp_1_6,DUF772	-	-	-	-	-	-	-	-
47	AAQ_11	AAQ_11_6	AAQ	k77_288287	8979	sub_T	4	no_sweep	0	AAQ_g32610_9	in	UniRef100_A0A173VME9	97.435	Transposase domain (DUF772)	1022	syn	E->E	-	DDE_Tnp_1,DDE_Tnp_1_6,DUF772	-	-	-	-	-	-	-	-
47	AAQ_11	AAQ_11_7	AAQ	k77_288287	8996	sub_G	4	no_sweep	0	AAQ_g32610_9	in	UniRef100_A0A173VME9	97.435	Transposase domain (DUF772)	1005	non_syn	T->P	-	DDE_Tnp_1,DDE_Tnp_1_6,DUF772	-	-	-	-	-	-	-	-
48	AAQ_13	AAQ_13_1	AAQ	k77_383732	2291	sub_A	1	sweep	0	AAQ_g35915_2	upstream	UniRef100_A0A076JLI9	100	Multidrug resistance protein B	-66	undefined	undefined	-	CBS,MFS_1	AAQ_g35915_3	downstream	UniRef100_A0A1D7UNZ6	97.2	Uncharacterized protein	275	undefined	undefined	-	-
49	AAQ_14	AAQ_14_1	AAQ	k77_277689	557	sub_A	1	no_sweep	0	AAQ_g95173_1	upstream	UniRef100_K1U0R4	73.451	Uncharacterized protein	-214	undefined	undefined	-	RepA_N	AAQ_g95173_2	downstream	UniRef100_UPI0011C1BAE9	68.739	hypothetical protein	4264	undefined	undefined	-	Gram_pos_anchor,SdrG_C_C
50	AAQ_18	AAQ_18_1	AAQ	k77_366712	50599	sub_T	1	no_sweep	0	AAQ_g2079_43	in	UniRef100_A0A1Q6Q2N9	99.4	N5-carboxyaminoimidazole ribonucleotide mutase	363	non_syn	A->T	ko:K01588	AIRC	-	-	-	-	-	-	-	-
51	AAQ_19	AAQ_19_1	AAQ	k77_222292	6478	sub_C	27	sweep	0	AAQ_g34594_6	downstream	UniRef100_A0A374J791	98.3	Radical SAM protein	1381	undefined	undefined	-	Fer4_14,Radical_SAM,SPASM	AAQ_g34594_7	upstream	UniRef100_A0A1C5RI33	77.411	Xanthine permease XanP	-202	undefined	undefined	ko:K03458	Xan_ur_permease
51	AAQ_19	AAQ_19_2	AAQ	k77_34760	1192	sub_G	27	sweep	0	AAQ_g81384_2	in	UniRef100_U2DHJ2	99.6	ThrE domain-containing protein	275	syn	Y->Y	-	ThrE,ThrE_2	-	-	-	-	-	-	-	-
51	AAQ_19	AAQ_19_3	AAQ	k77_34760	1267	sub_G	27	sweep	0	AAQ_g81384_2	in	UniRef100_U2DHJ2	99.6	ThrE domain-containing protein	200	syn	C->C	-	ThrE,ThrE_2	-	-	-	-	-	-	-	-
51	AAQ_19	AAQ_19_4	AAQ	k77_34760	1270	sub_A	27	sweep	0	AAQ_g81384_2	in	UniRef100_U2DHJ2	99.6	ThrE domain-containing protein	197	syn	Ii->Ii	-	ThrE,ThrE_2	-	-	-	-	-	-	-	-
51	AAQ_19	AAQ_19_5	AAQ	k77_375671	9578	sub_C	27	sweep	0	AAQ_g25276_7	in	UniRef100_A0A1C5V5B9	100	Na+-dependent transporters of the SNF family	500	syn	G->G	ko:K03308	SNF	-	-	-	-	-	-	-	-
51	AAQ_19	AAQ_19_6	AAQ	k77_67373	1346	sub_G	27	sweep	0	AAQ_g17840_2	in	UniRef100_A0A1C5LWD6	99.016	Inner membrane ABC transporter permease protein ycjP	548	syn	F->F	ko:K05815	BPD_transp_1	-	-	-	-	-	-	-	-
51	AAQ_19	AAQ_19_7	AAQ	k77_34760	1273	sub_A	27	no_sweep	0	AAQ_g81384_2	in	UniRef100_U2DHJ2	99.6	ThrE domain-containing protein	194	syn	G->G	-	ThrE,ThrE_2	-	-	-	-	-	-	-	-
51	AAQ_19	AAQ_19_8	AAQ	k77_34760	1276	sub_G	27	no_sweep	0	AAQ_g81384_2	in	UniRef100_U2DHJ2	99.6	ThrE domain-containing protein	191	syn	F->F	-	ThrE,ThrE_2	-	-	-	-	-	-	-	-
51	AAQ_19	AAQ_19_9	AAQ	k77_34760	1330	sub_T	27	no_sweep	0	AAQ_g81384_2	in	UniRef100_U2DHJ2	99.6	ThrE domain-containing protein	137	syn	A->A	-	ThrE,ThrE_2	-	-	-	-	-	-	-	-
51	AAQ_19	AAQ_19_10	AAQ	k77_375671	2222	sub_T	27	no_sweep	0	AAQ_g25276_2	in	UniRef100_A0A367G3F0	100	Carbohydrate ABC transporter permease	800	syn	R->R	-	BPD_transp_1	-	-	-	-	-	-	-	-
51	AAQ_19	AAQ_19_11	AAQ	k77_375671	2223	sub_T	27	no_sweep	0	AAQ_g25276_2	in	UniRef100_A0A367G3F0	100	Carbohydrate ABC transporter permease	799	non_syn	K->R	-	BPD_transp_1	-	-	-	-	-	-	-	-
51	AAQ_19	AAQ_19_12	AAQ	k77_412371	250	sub_T	27	no_sweep	0	AAQ_g25407_1	in	UniRef100_A0A1C5TRB8	100	Shikimate kinase	429	non_syn	Ii->V	ko:K00891	SKI	-	-	-	-	-	-	-	-
51	AAQ_19	AAQ_19_13	AAQ	k77_179983	1606	sub_A	27	sweep	0	AAQ_g52883_1	in	UniRef100_A0A1C5RIW0	72.379	ATP-dependent helicase HepA	861	non_syn	F->L	ko:K08282	Helicase_C,SNF2_N,SNF2_assoc,SWIM	-	-	-	-	-	-	-	-
51	AAQ_19	AAQ_19_14	AAQ	k77_179983	1610	sub_G	27	sweep	0	AAQ_g52883_1	in	UniRef100_A0A1C5RIW0	72.379	ATP-dependent helicase HepA	857	syn	F->F	ko:K08282	Helicase_C,SNF2_N,SNF2_assoc,SWIM	-	-	-	-	-	-	-	-
51	AAQ_19	AAQ_19_15	AAQ	k77_375671	1128	sub_T	27	sweep	0	AAQ_g25276_1	in	UniRef100_A0A1C5V5Z3	99.9	Beta-galactosidase	1042	non_syn	K->R	ko:K01192	Glyco_hydro_2,Glyco_hydro_2_C,Glyco_hydro_2_N	-	-	-	-	-	-	-	-
51	AAQ_19	AAQ_19_16	AAQ	k77_450638	779	sub_C	27	sweep	0	AAQ_g50320_2	in	UniRef100_A0A1C5VIV4	99.7	Glycogen debranching enzyme	338	syn	V->V	ko:K01214	Alpha-amylase	-	-	-	-	-	-	-	-
51	AAQ_19	AAQ_19_17	AAQ	k77_158691	342	sub_T	27	no_sweep	0	AAQ_g68748_1	in	UniRef100_A0A1Q6TXS4	87.503	RNA pseudouridine synthase	341	syn	Ii->Ii	ko:K06180	PseudoU_synth_2	-	-	-	-	-	-	-	-
51	AAQ_19	AAQ_19_18	AAQ	k77_158691	345	sub_C	27	no_sweep	0	AAQ_g68748_1	in	UniRef100_A0A1Q6TXS4	87.503	RNA pseudouridine synthase	344	syn	L->L	ko:K06180	PseudoU_synth_2	-	-	-	-	-	-	-	-
51	AAQ_19	AAQ_19_19	AAQ	k77_158691	366	sub_G	27	no_sweep	0	AAQ_g68748_1	in	UniRef100_A0A1Q6TXS4	87.503	RNA pseudouridine synthase	365	syn	Q->Q	ko:K06180	PseudoU_synth_2	-	-	-	-	-	-	-	-
51	AAQ_19	AAQ_19_20	AAQ	k77_179983	4468	sub_A	27	no_sweep	0	AAQ_g52883_2	upstream	UniRef100_A0A564W4U4	99.6	Aspartate ammonia-lyase	-368	undefined	undefined	ko:K01744	FumaraseC_C,Lyase_1	AAQ_g52883_3	downstream	na	-1	na	462	undefined	undefined
51	AAQ_19	AAQ_19_21	AAQ	k77_180459	1022	sub_C	27	no_sweep	0	AAQ_g59489_2	in	UniRef100_A0A5C8A4K0	63.951	Alpha-1,4 glucan phosphorylase (Fragment)	149	syn	N->N	ko:K00688	Phosphorylase	-	-	-	-	-	-	-	-
51	AAQ_19	AAQ_19_22	AAQ	k77_180459	1223	sub_C	27	no_sweep	0	AAQ_g59489_2	in	UniRef100_A0A5C8A4K0	63.951	Alpha-1,4 glucan phosphorylase (Fragment)	350	syn	N->N	ko:K00688	Phosphorylase	-	-	-	-	-	-	-	-
51	AAQ_19	AAQ_19_23	AAQ	k77_325734	1596	sub_G	27	no_sweep	0	AAQ_g50630_3	in	UniRef100_A0A416QXT1	99.2	Methyltransferase domain-containing protein	1167	non_syn	L->Ii	-	MerR_1,Methyltransf_11,Methyltransf_25,Methyltransf_31	-	-	-	-	-	-	-	-
51	AAQ_19	AAQ_19_24	AAQ	k77_325734	1609	sub_A	27	no_sweep	0	AAQ_g50630_3	in	UniRef100_A0A416QXT1	99.2	Methyltransferase domain-containing protein	1154	syn	D->D	-	MerR_1,Methyltransf_11,Methyltransf_25,Methyltransf_31	-	-	-	-	-	-	-	-
51	AAQ_19	AAQ_19_25	AAQ	k77_338772	1722	sub_G	27	no_sweep	0	AAQ_g22915_2	in	UniRef100_A0A3S4ZPL3	90.909	Oligopeptide-binding protein AppA	263	syn	S->S	ko:K02035	SBP_bac_5	-	-	-	-	-	-	-	-
51	AAQ_19	AAQ_19_26	AAQ	k77_451063	2091	sub_A	27	no_sweep	0	AAQ_g56300_2	in	UniRef100_A0A1C5Y3G8	100	L-arabinose isomerase	920	syn	G->G	ko:K01804	Arabinose_Iso_C,Arabinose_Isome	-	-	-	-	-	-	-	-
51	AAQ_19	AAQ_19_27	AAQ	k77_76909	294	sub_T	27	no_sweep	0	AAQ_g53873_1	in	UniRef100_U2DCI6	71.678	Uncharacterized protein	293	syn	G->G	-	DUF4866	-	-	-	-	-	-	-	-
52	AAQ_26	AAQ_26_1	AAQ	k77_393829	738	sub_G	12	sweep	0	AAQ_g72768_1	in	UniRef100_A0A2N5PUK1	99.359	Restriction endonuclease	737	syn	E->E	-	RE_Eco47II	-	-	-	-	-	-	-	-
52	AAQ_26	AAQ_26_2	AAQ	k77_119184	3117	sub_C	12	no_sweep	0	AAQ_g29088_4	in	UniRef100_D4MUX7	100	ABC-type uncharacterized transport system, ATPase component	47	syn	Ii->Ii	ko:K05833	ABC_tran	-	-	-	-	-	-	-	-
52	AAQ_26	AAQ_26_3	AAQ	k77_119184	3561	sub_G	12	no_sweep	0	AAQ_g29088_4	in	UniRef100_D4MUX7	100	ABC-type uncharacterized transport system, ATPase component	491	non_syn	Li->L	ko:K05833	ABC_tran	-	-	-	-	-	-	-	-
52	AAQ_26	AAQ_26_4	AAQ	k77_159563	252	sub_C	12	no_sweep	0	AAQ_g80715_1	in	UniRef100_E5VLN3	46.374	Phosphotransferase system	479	syn	A->A	ko:K02818,ko:K02819	PTS_EIIA_1,PTS_EIIB,PTS_EIIC	-	-	-	-	-	-	-	-
52	AAQ_26	AAQ_26_5	AAQ	k77_161802	2216	sub_T	12	no_sweep	0	AAQ_g8105_3	in	UniRef100_D4MVE9	100	GTP cyclohydrolase-2	170	syn	T->T	ko:K14652	DHBP_synthase,GTP_cyclohydro2	-	-	-	-	-	-	-	-
52	AAQ_26	AAQ_26_6	AAQ	k77_378936	3527	sub_A	12	no_sweep	0	AAQ_g68433_4	in	UniRef100_A0A174D2L1	99.1	Sensor protein KdpD	1169	non_syn	L->F	ko:K07646	DUF4118,HATPase_c,HisKA,KdpD	-	-	-	-	-	-	-	-
52	AAQ_26	AAQ_26_7	AAQ	k77_378936	6772	sub_G	12	no_sweep	0	AAQ_g68433_8	in	UniRef100_D4MY68	100	Na(+)/serine-threonine symporter	1169	syn	V->V	-	SDF	-	-	-	-	-	-	-	-
52	AAQ_26	AAQ_26_8	AAQ	k77_378936	6781	sub_A	12	no_sweep	0	AAQ_g68433_8	in	UniRef100_D4MY68	100	Na(+)/serine-threonine symporter	1160	syn	Ii->Ii	-	SDF	-	-	-	-	-	-	-	-
52	AAQ_26	AAQ_26_9	AAQ	k77_378936	6790	sub_A	12	no_sweep	0	AAQ_g68433_8	in	UniRef100_D4MY68	100	Na(+)/serine-threonine symporter	1151	syn	D->D	-	SDF	-	-	-	-	-	-	-	-
52	AAQ_26	AAQ_26_10	AAQ	k77_388204	3937	sub_A	12	no_sweep	0	AAQ_g100762_3	in	UniRef100_A0A173YB34	91.149	Putative colanic biosynthesis UDP-glucose lipid carrier transferase	566	non_syn	Li->L	ko:K01955	ATP-grasp_3,HAD_2	-	-	-	-	-	-	-	-
52	AAQ_26	AAQ_26_11	AAQ	k77_388204	3958	sub_C	12	no_sweep	0	AAQ_g100762_3	in	UniRef100_A0A173YB34	91.149	Putative colanic biosynthesis UDP-glucose lipid carrier transferase	587	syn	R->R	ko:K01955	ATP-grasp_3,HAD_2	-	-	-	-	-	-	-	-
52	AAQ_26	AAQ_26_12	AAQ	k77_369180	3064	sub_G	12	no_sweep	0	AAQ_g35410_3	in	UniRef100_D4MY45	99.8	2-hydroxyglutaryl-CoA dehydratase	1292	syn	A->A	-	BcrAD_BadFG,HGD-D	-	-	-	-	-	-	-	-
53	AAQ_30	AAQ_30_1	AAQ	k77_102259	7991	sub_A	5	no_sweep	0	AAQ_g99853_5	in	UniRef100_A0A5M5M611	95.584	tRNA 2-thiouridine(34) synthase MnmA	186	non_syn	V->Ii	ko:K00566	tRNA_Me_trans	-	-	-	-	-	-	-	-
53	AAQ_30	AAQ_30_2	AAQ	k77_340869	17540	sub_C	5	no_sweep	0	AAQ_g53203_10	in	UniRef100_A0A413EZM6	100	Arylsulfatase	527	syn	H->H	-	Sulfatase	-	-	-	-	-	-	-	-
53	AAQ_30	AAQ_30_3	AAQ	k77_48691	6852	sub_T	5	no_sweep	0	AAQ_g61012_8	in	UniRef100_A0A6A1CZZ7	96.563	Uncharacterized protein (Fragment)	899	non_syn	Li->L	-	Glyco_hydro_115,Glyco_hydro_67N	-	-	-	-	-	-	-	-
53	AAQ_30	AAQ_30_4	AAQ	k77_48691	6864	sub_A	5	no_sweep	0	AAQ_g61012_8	in	UniRef100_A0A6A1CZZ7	96.563	Uncharacterized protein (Fragment)	887	syn	N->N	-	Glyco_hydro_115,Glyco_hydro_67N	-	-	-	-	-	-	-	-
53	AAQ_30	AAQ_30_5	AAQ	k77_68829	8064	sub_G	5	no_sweep	0	AAQ_g41054_5	in	UniRef100_A0A5M5M9M7	100	Beta-glucosidase	456	non_syn	D->N	ko:K05349	Fn3-like,Glyco_hydro_3,Glyco_hydro_3_C	-	-	-	-	-	-	-	-
54	AAQ_31	AAQ_31_1	AAQ	k77_266034	11373	sub_T	1	no_sweep	0	AAQ_g38540_13	in	UniRef100_A0A373ZTR4	82.7	Restriction endonuclease subunit S	1031	syn	V->V	-	Methylase_S	-	-	-	-	-	-	-	-
55	AAQ_35	AAQ_35_1	AAQ	k77_89238	1348	sub_C	1	no_sweep	0	AAQ_g19439_1	downstream	UniRef100_R5YKA4	95.478	Transposase IS110 family	1347	undefined	undefined	-	DEDD_Tnp_IS110,Transposase_20	AAQ_g19439_2	upstream	UniRef100_R5YCX9	100	Uncharacterized protein	-222	undefined	undefined	-	-
56	AAQ_42	AAQ_42_1	AAQ	k77_468461	6850	sub_T	2	no_sweep	0	AAQ_g90167_8	in	UniRef100_A0A4Q5C891	84.205	Lysine--tRNA ligase	1604	syn	F->F	ko:K04567	tRNA-synt_2,tRNA_anti-codon,tRNA_bind	-	-	-	-	-	-	-	-
56	AAQ_42	AAQ_42_2	AAQ	k77_75984	8304	sub_G	2	no_sweep	0	AAQ_g40575_9	in	UniRef100_A0A414HZI6	100	Toxin-antitoxin system protein	37	non_syn	N->S	-	-	-	-	-	-	-	-	-	-
57	AAQ_61	AAQ_61_1	AAQ	k77_41243	13772	sub_C	1	no_sweep	0	AAQ_g68835_11	in	UniRef100_UPI000E481768	58.505	ATP-binding protein	408	non_syn	S->A	-	IstB_IS21,IstB_IS21_ATP	-	-	-	-	-	-	-	-
58	BAA_1	BAA_1_1	BAA	k77_113523	12348	sub_G	1	no_sweep	0	BAA_g11486_10	in	UniRef100_A0A173V6W4	99.6	HTH-type transcriptional activator tipA	433	non_syn	Q->R	-	GyrI-like,MerR_1	-	-	-	-	-	-	-	-
58	BAA_1	BAA_1_2	BAA	k77_37108	25680	del_1	1	no_sweep	0	BAA_g22831_24	downstream	UniRef100_R5TN67	84.84	Polysacc_synt_2 domain-containing protein	1899	undefined	undefined	-	CoA_binding_3,Polysacc_synt_2	BAA_g22831_25	upstream	UniRef100_R5TGI1	97.8	Polysacc_synt_2 domain-containing protein	-29	undefined	undefined	-	CoA_binding_3,Polysacc_synt_2
58	BAA_1	BAA_1_3	BAA	k77_112457	16440	del_1	1	no_sweep	0	BAA_g41391_16	in	UniRef100_UPI0012B06BDD	99.2	diguanylate cyclase	1945	unknown	unknown	ko:K07814	GGDEF,HD,Response_reg	-	-	-	-	-	-	-	-
59	BAA_2	BAA_2_1	BAA	k77_185175	73229	sub_G	1	sweep	83	BAA_g16279_69	in	UniRef100_A0A412Z8J8	100	DNA gyrase subunit A	244	non_syn	S->F	ko:K02469	DNA_gyraseA_C,DNA_topoisoIV	-	-	-	-	-	-	-	-
59	BAA_2	BAA_2_2	BAA	k77_79481	8271	sub_A	2	no_sweep	0	BAA_g39736_9	in	UniRef100_A0A0K2HIB7	100	HDIG domain-containing protein	1424	syn	P->P	ko:K07037	7TM-7TMR_HD,7TMR-HDED,HD	-	-	-	-	-	-	-	-
59	BAA_2	BAA_2_3	BAA	k77_114282	26339	sub_A	2	no_sweep	0	BAA_g26082_19	in	UniRef100_A0A4R4H149	100	Beta-xylosidase	2465	syn	V->V	-	Glyco_hydro_2,Glyco_hydro_28,Glyco_hydro_43,Pectate_lyase_3	-	-	-	-	-	-	-	-
60	BAA_3	BAA_3_1	BAA	k77_122494	10000	sub_G	1	no_sweep	0	BAA_g9952_10	in	UniRef100_A0A072MT46	98.838	LacI family transcriptional regulator	25	non_syn	E->G	ko:K02529	LacI,Peripla_BP_1,Peripla_BP_3	-	-	-	-	-	-	-	-
60	BAA_3	BAA_3_2	BAA	k77_145787	50928	del_1	4	no_sweep	0	BAA_g3057_41	upstream	UniRef100_A0A139B8G4	100	50S ribosomal protein L25	-193	undefined	undefined	ko:K02897	Ribosomal_L25p,Ribosomal_TL5_C	BAA_g3057_42	upstream	UniRef100_A0A173ZAT2	100	Alpha/beta hydrolase	-93	undefined	undefined	ko:K06889	Abhydrolase_6,Hydrolase_4
60	BAA_3	BAA_3_3	BAA	k77_145787	112671	ins_A	4	no_sweep	0	BAA_g3057_97	in	UniRef100_A0A072MTS7	99.7	Acetylase	1375	unknown	unknown	-	Acyl_transf_3	-	-	-	-	-	-	-	-
60	BAA_3	BAA_3_4	BAA	k77_122494	21131	sub_C	4	no_sweep	0	BAA_g9952_18	in	UniRef100_UPI000E472E95	99.8	alpha/beta hydrolase	587	syn	S->S	-	-	-	-	-	-	-	-	-	-
60	BAA_3	BAA_3_5	BAA	k77_43420	21593	sub_C	4	no_sweep	0	BAA_g28686_25	in	UniRef100_UPI00080B78A5	100	Holliday junction branch migration protein RuvA	102	syn	Li->Li	ko:K03550	HHH_5,RuvA_C,RuvA_N	-	-	-	-	-	-	-	-
61	BAA_5	BAA_5_1	BAA	k77_134731	478	sub_C	6	no_sweep	0	BAA_g14474_1	in	UniRef100_K1RTI9	71.811	Two-component sensor histidine kinase (Fragment)	20	non_syn	L->Li	-	HATPase_c	-	-	-	-	-	-	-	-
61	BAA_5	BAA_5_2	BAA	k77_134731	480	sub_A	6	no_sweep	0	BAA_g14474_1	in	UniRef100_K1RTI9	71.811	Two-component sensor histidine kinase (Fragment)	18	syn	L->L	-	HATPase_c	-	-	-	-	-	-	-	-
61	BAA_5	BAA_5_3	BAA	k77_134731	665	sub_A	6	no_sweep	0	BAA_g14474_2	in	UniRef100_A0A374I7U0	99.5	DNA-binding response regulator	498	non_syn	A->S	-	Response_reg,Trans_reg_C	-	-	-	-	-	-	-	-
61	BAA_5	BAA_5_4	BAA	k77_134731	666	sub_G	6	no_sweep	0	BAA_g14474_2	in	UniRef100_A0A374I7U0	99.5	DNA-binding response regulator	497	syn	N->N	-	Response_reg,Trans_reg_C	-	-	-	-	-	-	-	-
61	BAA_5	BAA_5_5	BAA	k77_152961	3909	sub_A	6	no_sweep	0	BAA_g24522_6	in	UniRef100_R5VA90	99.3	ABC-type transport system involved in lipoprotein release permease component	302	syn	T->T	ko:K02004	FtsX	-	-	-	-	-	-	-	-
61	BAA_5	BAA_5_6	BAA	k77_128256	7660	sub_T	6	no_sweep	0	BAA_g6152_7	in	UniRef100_A0A173T5M6	100	UDP-N-acetylglucosamine diphosphorylase/glucosamine-1-phosphate N-acetyltransferase	848	syn	D->D	-	APH	-	-	-	-	-	-	-	-
61	BAA_5	BAA_5_7	BAA	k77_152961	3287	sub_A	5	no_sweep	0	BAA_g24522_6	in	UniRef100_R5VA90	99.3	ABC-type transport system involved in lipoprotein release permease component	924	non_syn	Vi->Li	ko:K02004	FtsX	-	-	-	-	-	-	-	-
61	BAA_5	BAA_5_8	BAA	k77_152961	3288	sub_G	5	no_sweep	0	BAA_g24522_6	in	UniRef100_R5VA90	99.3	ABC-type transport system involved in lipoprotein release permease component	923	syn	V->V	ko:K02004	FtsX	-	-	-	-	-	-	-	-
61	BAA_5	BAA_5_9	BAA	k77_152961	3297	sub_T	5	no_sweep	0	BAA_g24522_6	in	UniRef100_R5VA90	99.3	ABC-type transport system involved in lipoprotein release permease component	914	non_syn	Li->L	ko:K02004	FtsX	-	-	-	-	-	-	-	-
61	BAA_5	BAA_5_10	BAA	k77_32921	10121	sub_C	5	no_sweep	0	BAA_g3896_11	in	UniRef100_A0A173S134	99	Beta-galactosidase	773	syn	S->S	ko:K01190	Bgal_small_N	-	-	-	-	-	-	-	-
61	BAA_5	BAA_5_11	BAA	k77_32921	10127	sub_C	5	no_sweep	0	BAA_g3896_11	in	UniRef100_A0A173S134	99	Beta-galactosidase	767	syn	T->T	ko:K01190	Bgal_small_N	-	-	-	-	-	-	-	-
61	BAA_5	BAA_5_12	BAA	k77_16289	15031	sub_A	1	no_sweep	0	BAA_g19706_14	in	UniRef100_A0A351R5A2	99.8	Histidine kinase	1320	non_syn	L->F	ko:K07718	HAMP,HATPase_c,His_kinase	-	-	-	-	-	-	-	-
61	BAA_5	BAA_5_13	BAA	k77_171193	58013	sub_G	4	no_sweep	0	BAA_g33975_50	in	UniRef100_A0A374HYJ8	99.7	N-carbamoylputrescine amidase	308	syn	A->A	ko:K01431,ko:K12251	CN_hydrolase	-	-	-	-	-	-	-	-
61	BAA_5	BAA_5_14	BAA	k77_174313	43963	sub_G	4	no_sweep	0	BAA_g30493_38	in	UniRef100_A0A173SWS7	99.7	Nitronate monooxygenase	451	non_syn	Li->P	-	NMO	-	-	-	-	-	-	-	-
61	BAA_5	BAA_5_15	BAA	k77_75291	411	sub_T	4	no_sweep	0	BAA_g14839_1	in	UniRef100_R5UI54	100	O-acetylhomoserine sulfhydrolase	132	non_syn	H->Y	ko:K01740	Cys_Met_Meta_PP	-	-	-	-	-	-	-	-
61	BAA_5	BAA_5_16	BAA	k77_89391	1964	sub_A	4	no_sweep	0	BAA_g3043_3	downstream	UniRef100_A0A3B9D6J0	99.2	5-methyltetrahydropteroyltriglutamate--homocysteine methyltransferase	1149	undefined	undefined	-	Meth_synt_2	BAA_g3043_4	downstream	UniRef100_A0A0M6WKU4	100	Uncharacterized protein	721	undefined	undefined	-	-
61	BAA_5	BAA_5_17	BAA	k77_8740	9844	sub_T	1	no_sweep	0	BAA_g43537_12	in	UniRef100_A0A374IBX9	99.5	Uncharacterized protein	1358	syn	S->S	-	-	-	-	-	-	-	-	-	-
61	BAA_5	BAA_5_18	BAA	k77_93694	37068	sub_T	1	no_sweep	0	BAA_g25941_34	in	UniRef100_UPI001105FE09	50.013	type II secretion system protein	332	non_syn	K->N	-	N_methyl	-	-	-	-	-	-	-	-
62	BAA_6	BAA_6_1	BAA	k77_114799	2651	sub_G	1	sweep	83	BAA_g34760_1	in	UniRef100_R6A2E6	99	DNA gyrase subunit A	460	non_syn	S->F	ko:K02469	DNA_gyraseA_C,DNA_topoisoIV	-	-	-	-	-	-	-	-
62	BAA_6	BAA_6_2	BAA	k77_114799	2640	sub_T	10	no_sweep	87	BAA_g34760_1	in	UniRef100_R6A2E6	99	DNA gyrase subunit A	471	non_syn	E->K	ko:K02469	DNA_gyraseA_C,DNA_topoisoIV	-	-	-	-	-	-	-	-
62	BAA_6	BAA_6_3	BAA	k77_123665	1198	sub_A	10	no_sweep	513	BAA_g29279_2	in	UniRef100_UPI0011DE0F4B	97.6	ATP-binding cassette domain-containing protein	1648	non_syn	T->Mi	ko:K06147,ko:K11085	ABC_membrane,ABC_tran	-	-	-	-	-	-	-	-
62	BAA_6	BAA_6_4	BAA	k77_136652	39522	sub_T	10	no_sweep	0	BAA_g43068_27	in	UniRef100_A0A396FJJ6	99.5	Sensor histidine kinase	425	non_syn	Li->L	-	HisKA_3	-	-	-	-	-	-	-	-
62	BAA_6	BAA_6_5	BAA	k77_172923	16447	ins_C	10	no_sweep	0	BAA_g9304_14	downstream	UniRef100_A0A174I9B0	100	Predicted RNA-binding protein containing a PIN domain	1311	undefined	undefined	ko:K06962	NYN_YacP	BAA_g9304_15	upstream	UniRef100_A0A3G8U9W0	100	Elongation factor Tu	-803	undefined	undefined	ko:K02358	GTP_EFTU,GTP_EFTU_D2,GTP_EFTU_D3
62	BAA_6	BAA_6_6	BAA	k77_181790	622	sub_G	10	no_sweep	0	BAA_g9329_1	downstream	UniRef100_A0A374QXX2	98.8	FAD-dependent oxidoreductase	1782	undefined	undefined	ko:K00278	FAD_binding_2,Succ_DH_flav_C	-	-	-	-	-	-	-	-
62	BAA_6	BAA_6_7	BAA	k77_186496	1555	sub_A	10	no_sweep	0	BAA_g37821_2	in	UniRef100_A0A173X4B4	100	PTS mannose transporter subunit IID	620	syn	Ii->Ii	-	EIID-AGA	-	-	-	-	-	-	-	-
62	BAA_6	BAA_6_8	BAA	k77_25676	46412	sub_C	10	no_sweep	0	BAA_g32142_38	in	UniRef100_A0A415VA97	99.5	PTS lactose transporter subunit IIBC	871	non_syn	Li->P	ko:K02760,ko:K02787,ko:K02788	PTS_EIIC,PTS_IIB	-	-	-	-	-	-	-	-
62	BAA_6	BAA_6_9	BAA	k77_151998	45473	sub_A	10	no_sweep	0	BAA_g6542_33	downstream	UniRef100_A0A374R1P7	99.4	Peptidase M42	1169	undefined	undefined	-	Peptidase_M42	BAA_g6542_34	upstream	UniRef100_A0A413RFQ8	98.2	DNA-binding protein	-13	undefined	undefined	-	HTH_17
62	BAA_6	BAA_6_10	BAA	k77_65311	24864	sub_A	10	no_sweep	0	BAA_g44078_26	in	UniRef100_A0A413RGK9	99.7	DegV family EDD domain-containing protein	849	non_syn	Vi->Li	-	DegV	-	-	-	-	-	-	-	-
62	BAA_6	BAA_6_11	BAA	k77_90949	76622	sub_A	10	no_sweep	0	BAA_g28662_61	upstream	UniRef100_A0A174J7R5	100	Uncharacterized protein	-70	undefined	undefined	-	-	BAA_g28662_62	downstream	UniRef100_A0A174J7W8	100	Thioredoxin	472	undefined	undefined	ko:K03671	Thioredoxin
62	BAA_6	BAA_6_12	BAA	k77_162695	22772	sub_C	1	no_sweep	0	BAA_g38256_19	in	UniRef100_A0A412UJ11	99	Stp1/IreP family PP2C-type Ser/Thr phosphatase	696	non_syn	Y->H	ko:K20074	BofC_C,PP2C,PP2C_2	-	-	-	-	-	-	-	-
62	BAA_6	BAA_6_13	BAA	k77_62570	54761	sub_C	3	no_sweep	0	BAA_g3176_47	upstream	UniRef100_UPI0011DC7390	96.7	ATP-binding cassette domain-containing protein	-104	undefined	undefined	ko:K01990	ABC_tran	BAA_g3176_48	downstream	UniRef100_A0A2D1TXR8	100	XRE family transcriptional regulator	370	undefined	undefined	ko:K07727	HTH_26
62	BAA_6	BAA_6_14	BAA	k77_109141	14304	del_1	3	no_sweep	0	BAA_g36982_10	downstream	UniRef100_A0A415KJE8	100	Glutamyl-Q tRNA(Asp) synthetase	1026	undefined	undefined	ko:K01885	tRNA-synt_1c	BAA_g36982_11	upstream	UniRef100_A0A413DUL0	100	DUF1778 domain-containing protein	-79	undefined	undefined	-	HD_4
62	BAA_6	BAA_6_15	BAA	k77_63952	74678	sub_C	3	no_sweep	0	BAA_g23192_62	in	UniRef100_A0A413DY41	100	Branched-chain amino acid aminotransferase	750	non_syn	Ii->V	ko:K00826,ko:K02619	Aminotran_4	-	-	-	-	-	-	-	-
62	BAA_6	BAA_6_16	BAA	k77_65118	38158	sub_A	3	no_sweep	0	BAA_g40755_36	in	UniRef100_A0A381K3R8	97.4	Phosphatidate cytidylyltransferase	432	non_syn	L->F	ko:K00981	CTP_transf_1	-	-	-	-	-	-	-	-
62	BAA_6	BAA_6_17	BAA	k77_25676	75014	sub_C	3	no_sweep	0	BAA_g32142_69	in	UniRef100_A0A415V7Q4	87.276	PBPb domain-containing protein	777	non_syn	T->A	ko:K02030	SBP_bac_3	-	-	-	-	-	-	-	-
62	BAA_6	BAA_6_18	BAA	k77_35322	20652	sub_A	3	no_sweep	0	BAA_g43429_16	in	UniRef100_A0A412HSB8	99.5	Aldehyde oxidase	1019	syn	G->G	-	Ald_Xan_dh_C,Ald_Xan_dh_C2,Fer2_2	-	-	-	-	-	-	-	-
63	BAA_7	BAA_7_1	BAA	k77_154116	3567	sub_C	1	sweep	0	BAA_g39033_3	in	UniRef100_A0A414Q9J5	99.5	Crp/Fnr family transcriptional regulator	169	non_syn	A->E	-	cNMP_binding	-	-	-	-	-	-	-	-
63	BAA_7	BAA_7_2	BAA	k77_58979	973	sub_A	7	no_sweep	0	BAA_g38524_2	in	UniRef100_A0A5P3AVV6	100	Group II intron-encoded protein LtrA	977	syn	Ii->Ii	-	Intron_maturas2,RVT_1	-	-	-	-	-	-	-	-
63	BAA_7	BAA_7_3	BAA	k77_58979	1006	sub_A	7	no_sweep	0	BAA_g38524_2	in	UniRef100_A0A5P3AVV6	100	Group II intron-encoded protein LtrA	944	syn	Y->Y	-	Intron_maturas2,RVT_1	-	-	-	-	-	-	-	-
63	BAA_7	BAA_7_4	BAA	k77_58979	1109	sub_C	7	no_sweep	0	BAA_g38524_2	in	UniRef100_A0A5P3AVV6	100	Group II intron-encoded protein LtrA	841	non_syn	N->S	-	Intron_maturas2,RVT_1	-	-	-	-	-	-	-	-
63	BAA_7	BAA_7_5	BAA	k77_58979	1180	sub_A	7	no_sweep	0	BAA_g38524_2	in	UniRef100_A0A5P3AVV6	100	Group II intron-encoded protein LtrA	770	syn	T->T	-	Intron_maturas2,RVT_1	-	-	-	-	-	-	-	-
63	BAA_7	BAA_7_6	BAA	k77_58979	1522	sub_A	7	no_sweep	0	BAA_g38524_2	in	UniRef100_A0A5P3AVV6	100	Group II intron-encoded protein LtrA	428	syn	P->P	-	Intron_maturas2,RVT_1	-	-	-	-	-	-	-	-
63	BAA_7	BAA_7_7	BAA	k77_58979	1537	sub_T	7	no_sweep	0	BAA_g38524_2	in	UniRef100_A0A5P3AVV6	100	Group II intron-encoded protein LtrA	413	syn	S->S	-	Intron_maturas2,RVT_1	-	-	-	-	-	-	-	-
63	BAA_7	BAA_7_8	BAA	k77_58979	1609	sub_A	7	no_sweep	0	BAA_g38524_2	in	UniRef100_A0A5P3AVV6	100	Group II intron-encoded protein LtrA	341	syn	N->N	-	Intron_maturas2,RVT_1	-	-	-	-	-	-	-	-
63	BAA_7	BAA_7_9	BAA	k77_76138	68191	sub_T	25	no_sweep	0	-	-	-	-	-	-	-	-			-	-	-	-	-	-	-	-
63	BAA_7	BAA_7_10	BAA	k77_76138	68245	sub_C	25	no_sweep	0	-	-	-	-	-	-	-	-			-	-	-	-	-	-	-	-
63	BAA_7	BAA_7_11	BAA	k77_76138	68383	sub_C	25	no_sweep	0	-	-	-	-	-	-	-	-			-	-	-	-	-	-	-	-
63	BAA_7	BAA_7_12	BAA	k77_76138	68411	sub_A	25	no_sweep	0	-	-	-	-	-	-	-	-			-	-	-	-	-	-	-	-
63	BAA_7	BAA_7_13	BAA	k77_76138	68458	sub_C	25	no_sweep	0	-	-	-	-	-	-	-	-			-	-	-	-	-	-	-	-
63	BAA_7	BAA_7_14	BAA	k77_76138	68515	sub_C	25	no_sweep	0	-	-	-	-	-	-	-	-			-	-	-	-	-	-	-	-
63	BAA_7	BAA_7_15	BAA	k77_76138	68533	sub_T	25	no_sweep	0	-	-	-	-	-	-	-	-			-	-	-	-	-	-	-	-
63	BAA_7	BAA_7_16	BAA	k77_76138	68536	sub_C	25	no_sweep	0	-	-	-	-	-	-	-	-			-	-	-	-	-	-	-	-
63	BAA_7	BAA_7_17	BAA	k77_76138	68539	sub_T	25	no_sweep	0	-	-	-	-	-	-	-	-			-	-	-	-	-	-	-	-
63	BAA_7	BAA_7_18	BAA	k77_76138	68548	sub_G	25	no_sweep	0	-	-	-	-	-	-	-	-			-	-	-	-	-	-	-	-
63	BAA_7	BAA_7_19	BAA	k77_76138	68641	sub_T	25	no_sweep	0	-	-	-	-	-	-	-	-			-	-	-	-	-	-	-	-
63	BAA_7	BAA_7_20	BAA	k77_76138	68662	sub_A	25	no_sweep	0	-	-	-	-	-	-	-	-			-	-	-	-	-	-	-	-
63	BAA_7	BAA_7_21	BAA	k77_76138	68680	sub_A	25	no_sweep	0	-	-	-	-	-	-	-	-			-	-	-	-	-	-	-	-
63	BAA_7	BAA_7_22	BAA	k77_76138	68884	sub_C	25	no_sweep	0	-	-	-	-	-	-	-	-			-	-	-	-	-	-	-	-
63	BAA_7	BAA_7_23	BAA	k77_76138	68914	sub_C	25	no_sweep	0	-	-	-	-	-	-	-	-			-	-	-	-	-	-	-	-
63	BAA_7	BAA_7_24	BAA	k77_76138	68929	sub_C	25	no_sweep	0	-	-	-	-	-	-	-	-			-	-	-	-	-	-	-	-
63	BAA_7	BAA_7_25	BAA	k77_76138	68965	sub_A	25	no_sweep	0	-	-	-	-	-	-	-	-			-	-	-	-	-	-	-	-
63	BAA_7	BAA_7_26	BAA	k77_76138	69145	sub_A	25	no_sweep	0	-	-	-	-	-	-	-	-			-	-	-	-	-	-	-	-
63	BAA_7	BAA_7_27	BAA	k77_76138	69250	sub_A	25	no_sweep	0	-	-	-	-	-	-	-	-			-	-	-	-	-	-	-	-
63	BAA_7	BAA_7_28	BAA	k77_76138	69262	sub_G	25	no_sweep	0	-	-	-	-	-	-	-	-			-	-	-	-	-	-	-	-
63	BAA_7	BAA_7_29	BAA	k77_76138	69301	sub_A	25	no_sweep	0	-	-	-	-	-	-	-	-			-	-	-	-	-	-	-	-
63	BAA_7	BAA_7_30	BAA	k77_76138	69331	sub_A	25	no_sweep	0	-	-	-	-	-	-	-	-			-	-	-	-	-	-	-	-
63	BAA_7	BAA_7_31	BAA	k77_76138	69355	sub_A	25	no_sweep	0	-	-	-	-	-	-	-	-			-	-	-	-	-	-	-	-
63	BAA_7	BAA_7_32	BAA	k77_76138	69469	sub_G	25	no_sweep	0	-	-	-	-	-	-	-	-			-	-	-	-	-	-	-	-
63	BAA_7	BAA_7_33	BAA	k77_76138	69481	sub_T	25	no_sweep	0	-	-	-	-	-	-	-	-			-	-	-	-	-	-	-	-
64	BAA_8	BAA_8_1	BAA	k77_126470	28517	del_2	7	no_sweep	0	BAA_g29717_25	upstream	UniRef100_A0A173VRS8	100	Multidrug-efflux transporter 1 regulator	-46	undefined	undefined	-	GyrI-like,MerR_1	BAA_g29717_26	upstream	UniRef100_A0A173VTC9	100	MATE family efflux transporter	-90	undefined	undefined	-	MatE
64	BAA_8	BAA_8_2	BAA	k77_12627	2026	sub_T	7	no_sweep	0	BAA_g10887_1	in	UniRef100_A0A414SVP6	33.359	DUF3849 domain-containing protein	2025	syn	L->L	-	DUF3849,Helicase_C,ResIII,SNF2_N	-	-	-	-	-	-	-	-
64	BAA_8	BAA_8_3	BAA	k77_12627	2064	sub_T	7	no_sweep	0	BAA_g10887_1	in	UniRef100_A0A414SVP6	33.359	DUF3849 domain-containing protein	2063	syn	D->D	-	DUF3849,Helicase_C,ResIII,SNF2_N	-	-	-	-	-	-	-	-
64	BAA_8	BAA_8_4	BAA	k77_12627	2208	sub_T	7	no_sweep	0	BAA_g10887_1	in	UniRef100_A0A414SVP6	33.359	DUF3849 domain-containing protein	2207	syn	G->G	-	DUF3849,Helicase_C,ResIII,SNF2_N	-	-	-	-	-	-	-	-
64	BAA_8	BAA_8_5	BAA	k77_83666	929	sub_A	7	no_sweep	0	BAA_g8675_2	in	UniRef100_D4KTG6	99.5	Glycosidases	159	syn	R->R	ko:K01208	Alpha-amylase,Alpha-amylase_N,Malt_amylase_C	-	-	-	-	-	-	-	-
64	BAA_8	BAA_8_6	BAA	k77_83666	930	sub_A	7	no_sweep	0	BAA_g8675_2	in	UniRef100_D4KTG6	99.5	Glycosidases	160	non_syn	R->Q	ko:K01208	Alpha-amylase,Alpha-amylase_N,Malt_amylase_C	-	-	-	-	-	-	-	-
64	BAA_8	BAA_8_7	BAA	k77_83666	931	sub_A	7	no_sweep	0	BAA_g8675_2	in	UniRef100_D4KTG6	99.5	Glycosidases	161	syn	R->R	ko:K01208	Alpha-amylase,Alpha-amylase_N,Malt_amylase_C	-	-	-	-	-	-	-	-
64	BAA_8	BAA_8_8	BAA	k77_41367	21720	sub_A	104	no_sweep	0	BAA_g43038_28	in	UniRef100_A0A174QJ44	97.4	Uncharacterized HTH-type transcriptional regulator ypdC	882	syn	Li->Li	-	AraC_binding,Cupin_2,HTH_18	-	-	-	-	-	-	-	-
64	BAA_8	BAA_8_9	BAA	k77_41367	21736	sub_G	104	no_sweep	0	BAA_g43038_28	in	UniRef100_A0A174QJ44	97.4	Uncharacterized HTH-type transcriptional regulator ypdC	866	syn	L->L	-	AraC_binding,Cupin_2,HTH_18	-	-	-	-	-	-	-	-
64	BAA_8	BAA_8_10	BAA	k77_41367	21949	sub_G	104	no_sweep	0	BAA_g43038_28	in	UniRef100_A0A174QJ44	97.4	Uncharacterized HTH-type transcriptional regulator ypdC	653	syn	C->C	-	AraC_binding,Cupin_2,HTH_18	-	-	-	-	-	-	-	-
64	BAA_8	BAA_8_11	BAA	k77_41367	21985	sub_T	104	no_sweep	0	BAA_g43038_28	in	UniRef100_A0A174QJ44	97.4	Uncharacterized HTH-type transcriptional regulator ypdC	617	syn	G->G	-	AraC_binding,Cupin_2,HTH_18	-	-	-	-	-	-	-	-
64	BAA_8	BAA_8_12	BAA	k77_41367	22024	sub_A	104	no_sweep	0	BAA_g43038_28	in	UniRef100_A0A174QJ44	97.4	Uncharacterized HTH-type transcriptional regulator ypdC	578	non_syn	Q->H	-	AraC_binding,Cupin_2,HTH_18	-	-	-	-	-	-	-	-
64	BAA_8	BAA_8_13	BAA	k77_41367	22272	sub_C	104	no_sweep	0	BAA_g43038_28	in	UniRef100_A0A174QJ44	97.4	Uncharacterized HTH-type transcriptional regulator ypdC	330	non_syn	S->A	-	AraC_binding,Cupin_2,HTH_18	-	-	-	-	-	-	-	-
64	BAA_8	BAA_8_14	BAA	k77_41367	22314	sub_A	104	no_sweep	0	BAA_g43038_28	in	UniRef100_A0A174QJ44	97.4	Uncharacterized HTH-type transcriptional regulator ypdC	288	non_syn	A->S	-	AraC_binding,Cupin_2,HTH_18	-	-	-	-	-	-	-	-
64	BAA_8	BAA_8_15	BAA	k77_41367	22315	sub_A	104	no_sweep	0	BAA_g43038_28	in	UniRef100_A0A174QJ44	97.4	Uncharacterized HTH-type transcriptional regulator ypdC	287	syn	G->G	-	AraC_binding,Cupin_2,HTH_18	-	-	-	-	-	-	-	-
64	BAA_8	BAA_8_16	BAA	k77_41367	22336	sub_C	104	no_sweep	0	BAA_g43038_28	in	UniRef100_A0A174QJ44	97.4	Uncharacterized HTH-type transcriptional regulator ypdC	266	syn	E->E	-	AraC_binding,Cupin_2,HTH_18	-	-	-	-	-	-	-	-
64	BAA_8	BAA_8_17	BAA	k77_41367	22381	sub_C	104	no_sweep	0	BAA_g43038_28	in	UniRef100_A0A174QJ44	97.4	Uncharacterized HTH-type transcriptional regulator ypdC	221	syn	Q->Q	-	AraC_binding,Cupin_2,HTH_18	-	-	-	-	-	-	-	-
64	BAA_8	BAA_8_18	BAA	k77_41367	22496	sub_T	104	no_sweep	0	BAA_g43038_28	in	UniRef100_A0A174QJ44	97.4	Uncharacterized HTH-type transcriptional regulator ypdC	106	non_syn	R->K	-	AraC_binding,Cupin_2,HTH_18	-	-	-	-	-	-	-	-
64	BAA_8	BAA_8_19	BAA	k77_41367	22564	sub_T	104	no_sweep	0	BAA_g43038_28	in	UniRef100_A0A174QJ44	97.4	Uncharacterized HTH-type transcriptional regulator ypdC	38	syn	Q->Q	-	AraC_binding,Cupin_2,HTH_18	-	-	-	-	-	-	-	-
64	BAA_8	BAA_8_20	BAA	k77_41367	22608	sub_A	104	no_sweep	0	BAA_g43038_28	upstream	UniRef100_A0A174QJ44	97.4	Uncharacterized HTH-type transcriptional regulator ypdC	-6	undefined	undefined	-	AraC_binding,Cupin_2,HTH_18	BAA_g43038_29	upstream	UniRef100_A0A413SMP5	99.7	Alpha/beta hydrolase	-209	undefined	undefined	ko:K03821	Abhydrolase_3,PAE
64	BAA_8	BAA_8_21	BAA	k77_41367	22621	sub_G	104	no_sweep	0	BAA_g43038_28	upstream	UniRef100_A0A174QJ44	97.4	Uncharacterized HTH-type transcriptional regulator ypdC	-19	undefined	undefined	-	AraC_binding,Cupin_2,HTH_18	BAA_g43038_29	upstream	UniRef100_A0A413SMP5	99.7	Alpha/beta hydrolase	-196	undefined	undefined	ko:K03821	Abhydrolase_3,PAE
64	BAA_8	BAA_8_22	BAA	k77_41367	22806	sub_T	104	no_sweep	0	BAA_g43038_28	upstream	UniRef100_A0A174QJ44	97.4	Uncharacterized HTH-type transcriptional regulator ypdC	-204	undefined	undefined	-	AraC_binding,Cupin_2,HTH_18	BAA_g43038_29	upstream	UniRef100_A0A413SMP5	99.7	Alpha/beta hydrolase	-11	undefined	undefined	ko:K03821	Abhydrolase_3,PAE
64	BAA_8	BAA_8_23	BAA	k77_41367	34024	sub_G	104	no_sweep	0	BAA_g43038_35	downstream	UniRef100_A0A413BF21	98.1	SGNH/GDSL hydrolase family protein	888	undefined	undefined	-	Lipase_GDSL_2	BAA_g43038_36	upstream	UniRef100_A0A3R6DGM1	99.8	Uncharacterized protein	-28	undefined	undefined	-	MFS_2
64	BAA_8	BAA_8_24	BAA	k77_41367	34160	sub_G	104	no_sweep	0	BAA_g43038_36	in	UniRef100_A0A3R6DGM1	99.8	Uncharacterized protein	108	non_syn	Ii->V	-	MFS_2	-	-	-	-	-	-	-	-
64	BAA_8	BAA_8_25	BAA	k77_41367	34235	sub_T	104	no_sweep	0	BAA_g43038_36	in	UniRef100_A0A3R6DGM1	99.8	Uncharacterized protein	183	non_syn	L->F	-	MFS_2	-	-	-	-	-	-	-	-
64	BAA_8	BAA_8_26	BAA	k77_41367	34728	sub_A	104	no_sweep	0	BAA_g43038_36	in	UniRef100_A0A3R6DGM1	99.8	Uncharacterized protein	676	non_syn	R->K	-	MFS_2	-	-	-	-	-	-	-	-
64	BAA_8	BAA_8_27	BAA	k77_41367	34839	sub_C	104	no_sweep	0	BAA_g43038_36	in	UniRef100_A0A3R6DGM1	99.8	Uncharacterized protein	787	non_syn	V->A	-	MFS_2	-	-	-	-	-	-	-	-
64	BAA_8	BAA_8_28	BAA	k77_41367	35177	sub_A	104	no_sweep	0	BAA_g43038_36	in	UniRef100_A0A3R6DGM1	99.8	Uncharacterized protein	1125	non_syn	A->T	-	MFS_2	-	-	-	-	-	-	-	-
64	BAA_8	BAA_8_29	BAA	k77_84414	17349	sub_C	104	no_sweep	0	BAA_g23805_18	in	UniRef100_R9N1S6	100	Excisionase family DNA binding domain-containing protein	3	non_syn	S->G	-	HTH_17	-	-	-	-	-	-	-	-
64	BAA_8	BAA_8_30	BAA	k77_84414	17374	sub_C	104	no_sweep	0	BAA_g23805_18	upstream	UniRef100_R9N1S6	100	Excisionase family DNA binding domain-containing protein	-22	undefined	undefined	-	HTH_17	BAA_g23805_19	upstream	UniRef100_A0A1C5Z9R8	100	Transcriptional repressor DicA	-159	undefined	undefined	-	HTH_3,HTH_31
64	BAA_8	BAA_8_31	BAA	k77_84414	17658	sub_A	104	no_sweep	0	BAA_g23805_19	in	UniRef100_A0A1C5Z9R8	100	Transcriptional repressor DicA	125	syn	Q->Q	-	HTH_3,HTH_31	-	-	-	-	-	-	-	-
64	BAA_8	BAA_8_32	BAA	k77_92450	6595	sub_C	104	no_sweep	0	BAA_g6109_8	downstream	UniRef100_D4KY27	100	GMP synthase [glutamine-hydrolyzing]	1674	undefined	undefined	ko:K01951	GATase,GMP_synt_C,NAD_synthase,tRNA_Me_trans	-	-	-	-	-	-	-	-
64	BAA_8	BAA_8_33	BAA	k77_41367	23207	sub_T	104	no_sweep	0	BAA_g43038_29	in	UniRef100_A0A413SMP5	99.7	Alpha/beta hydrolase	390	non_syn	P->S	ko:K03821	Abhydrolase_3,PAE	-	-	-	-	-	-	-	-
64	BAA_8	BAA_8_34	BAA	k77_41367	23236	sub_G	104	no_sweep	0	BAA_g43038_29	in	UniRef100_A0A413SMP5	99.7	Alpha/beta hydrolase	419	non_syn	N->K	ko:K03821	Abhydrolase_3,PAE	-	-	-	-	-	-	-	-
64	BAA_8	BAA_8_35	BAA	k77_41367	23237	sub_G	104	no_sweep	0	BAA_g43038_29	in	UniRef100_A0A413SMP5	99.7	Alpha/beta hydrolase	420	non_syn	S->G	ko:K03821	Abhydrolase_3,PAE	-	-	-	-	-	-	-	-
64	BAA_8	BAA_8_36	BAA	k77_41367	23407	sub_C	104	no_sweep	0	BAA_g43038_29	in	UniRef100_A0A413SMP5	99.7	Alpha/beta hydrolase	590	syn	S->S	ko:K03821	Abhydrolase_3,PAE	-	-	-	-	-	-	-	-
64	BAA_8	BAA_8_37	BAA	k77_41367	23426	sub_T	104	no_sweep	0	BAA_g43038_29	in	UniRef100_A0A413SMP5	99.7	Alpha/beta hydrolase	609	syn	Li->Li	ko:K03821	Abhydrolase_3,PAE	-	-	-	-	-	-	-	-
64	BAA_8	BAA_8_38	BAA	k77_41367	23703	sub_C	104	no_sweep	0	BAA_g43038_29	in	UniRef100_A0A413SMP5	99.7	Alpha/beta hydrolase	886	non_syn	Vi->A	ko:K03821	Abhydrolase_3,PAE	-	-	-	-	-	-	-	-
64	BAA_8	BAA_8_39	BAA	k77_41367	23994	sub_A	104	no_sweep	0	-	-	-	-	-	-	-	-			-	-	-	-	-	-	-	-
64	BAA_8	BAA_8_40	BAA	k77_41367	24036	sub_A	104	no_sweep	0	-	-	-	-	-	-	-	-			-	-	-	-	-	-	-	-
64	BAA_8	BAA_8_41	BAA	k77_41367	24252	sub_A	104	no_sweep	0	-	-	-	-	-	-	-	-			-	-	-	-	-	-	-	-
64	BAA_8	BAA_8_42	BAA	k77_41367	24288	sub_C	104	no_sweep	0	-	-	-	-	-	-	-	-			-	-	-	-	-	-	-	-
64	BAA_8	BAA_8_43	BAA	k77_41367	24351	sub_A	104	no_sweep	0	-	-	-	-	-	-	-	-			-	-	-	-	-	-	-	-
64	BAA_8	BAA_8_44	BAA	k77_41367	24514	sub_T	104	no_sweep	0	-	-	-	-	-	-	-	-			-	-	-	-	-	-	-	-
64	BAA_8	BAA_8_45	BAA	k77_41367	24516	sub_T	104	no_sweep	0	-	-	-	-	-	-	-	-			-	-	-	-	-	-	-	-
64	BAA_8	BAA_8_46	BAA	k77_41367	31265	sub_C	104	no_sweep	0	BAA_g43038_34	in	UniRef100_A0A3R6AIK2	100	Uncharacterized protein	61	non_syn	L->P	-	Bac_rhamnosid,Bac_rhamnosid6H,Bac_rhamnosid_C,Bac_rhamnosid_N	-	-	-	-	-	-	-	-
64	BAA_8	BAA_8_47	BAA	k77_41367	31332	sub_G	104	no_sweep	0	BAA_g43038_34	in	UniRef100_A0A3R6AIK2	100	Uncharacterized protein	128	non_syn	V->Vi	-	Bac_rhamnosid,Bac_rhamnosid6H,Bac_rhamnosid_C,Bac_rhamnosid_N	-	-	-	-	-	-	-	-
64	BAA_8	BAA_8_48	BAA	k77_41367	31353	sub_C	104	no_sweep	0	BAA_g43038_34	in	UniRef100_A0A3R6AIK2	100	Uncharacterized protein	149	syn	V->V	-	Bac_rhamnosid,Bac_rhamnosid6H,Bac_rhamnosid_C,Bac_rhamnosid_N	-	-	-	-	-	-	-	-
64	BAA_8	BAA_8_49	BAA	k77_41367	31544	sub_C	104	no_sweep	0	BAA_g43038_34	in	UniRef100_A0A3R6AIK2	100	Uncharacterized protein	340	non_syn	L->S	-	Bac_rhamnosid,Bac_rhamnosid6H,Bac_rhamnosid_C,Bac_rhamnosid_N	-	-	-	-	-	-	-	-
64	BAA_8	BAA_8_50	BAA	k77_41367	31611	sub_A	104	no_sweep	0	BAA_g43038_34	in	UniRef100_A0A3R6AIK2	100	Uncharacterized protein	407	syn	T->T	-	Bac_rhamnosid,Bac_rhamnosid6H,Bac_rhamnosid_C,Bac_rhamnosid_N	-	-	-	-	-	-	-	-
64	BAA_8	BAA_8_51	BAA	k77_41367	31908	sub_G	104	no_sweep	0	BAA_g43038_34	in	UniRef100_A0A3R6AIK2	100	Uncharacterized protein	704	syn	A->A	-	Bac_rhamnosid,Bac_rhamnosid6H,Bac_rhamnosid_C,Bac_rhamnosid_N	-	-	-	-	-	-	-	-
64	BAA_8	BAA_8_52	BAA	k77_41367	32269	sub_G	104	no_sweep	0	BAA_g43038_34	in	UniRef100_A0A3R6AIK2	100	Uncharacterized protein	1065	non_syn	T->A	-	Bac_rhamnosid,Bac_rhamnosid6H,Bac_rhamnosid_C,Bac_rhamnosid_N	-	-	-	-	-	-	-	-
64	BAA_8	BAA_8_53	BAA	k77_41367	32307	sub_A	104	no_sweep	0	BAA_g43038_34	in	UniRef100_A0A3R6AIK2	100	Uncharacterized protein	1103	syn	R->R	-	Bac_rhamnosid,Bac_rhamnosid6H,Bac_rhamnosid_C,Bac_rhamnosid_N	-	-	-	-	-	-	-	-
64	BAA_8	BAA_8_54	BAA	k77_41367	36288	sub_G	104	no_sweep	0	BAA_g43038_37	in	UniRef100_A0A3R6A5C4	100	Glycosyl hydrolase	836	syn	E->E	ko:K01207,ko:K05349	Fn3-like,Glyco_hydro_3,Glyco_hydro_3_C	-	-	-	-	-	-	-	-
64	BAA_8	BAA_8_55	BAA	k77_41367	36292	sub_G	104	no_sweep	0	BAA_g43038_37	in	UniRef100_A0A3R6A5C4	100	Glycosyl hydrolase	840	non_syn	Ii->V	ko:K01207,ko:K05349	Fn3-like,Glyco_hydro_3,Glyco_hydro_3_C	-	-	-	-	-	-	-	-
64	BAA_8	BAA_8_56	BAA	k77_41367	36320	ins_AGC	104	no_sweep	0	BAA_g43038_37	in	UniRef100_A0A3R6A5C4	100	Glycosyl hydrolase	868	unknown	unknown	ko:K01207,ko:K05349	Fn3-like,Glyco_hydro_3,Glyco_hydro_3_C	-	-	-	-	-	-	-	-
64	BAA_8	BAA_8_57	BAA	k77_41367	36326	sub_G	104	no_sweep	0	BAA_g43038_37	in	UniRef100_A0A3R6A5C4	100	Glycosyl hydrolase	874	non_syn	H->R	ko:K01207,ko:K05349	Fn3-like,Glyco_hydro_3,Glyco_hydro_3_C	-	-	-	-	-	-	-	-
64	BAA_8	BAA_8_58	BAA	k77_41367	36327	sub_T	104	no_sweep	0	BAA_g43038_37	in	UniRef100_A0A3R6A5C4	100	Glycosyl hydrolase	875	syn	H->H	ko:K01207,ko:K05349	Fn3-like,Glyco_hydro_3,Glyco_hydro_3_C	-	-	-	-	-	-	-	-
64	BAA_8	BAA_8_59	BAA	k77_41367	36372	sub_T	104	no_sweep	0	BAA_g43038_37	in	UniRef100_A0A3R6A5C4	100	Glycosyl hydrolase	920	syn	A->A	ko:K01207,ko:K05349	Fn3-like,Glyco_hydro_3,Glyco_hydro_3_C	-	-	-	-	-	-	-	-
64	BAA_8	BAA_8_60	BAA	k77_41367	36378	sub_T	104	no_sweep	0	BAA_g43038_37	in	UniRef100_A0A3R6A5C4	100	Glycosyl hydrolase	926	syn	Ii->Ii	ko:K01207,ko:K05349	Fn3-like,Glyco_hydro_3,Glyco_hydro_3_C	-	-	-	-	-	-	-	-
64	BAA_8	BAA_8_61	BAA	k77_41367	36384	sub_G	104	no_sweep	0	BAA_g43038_37	in	UniRef100_A0A3R6A5C4	100	Glycosyl hydrolase	932	syn	T->T	ko:K01207,ko:K05349	Fn3-like,Glyco_hydro_3,Glyco_hydro_3_C	-	-	-	-	-	-	-	-
64	BAA_8	BAA_8_62	BAA	k77_41367	36392	sub_C	104	no_sweep	0	BAA_g43038_37	in	UniRef100_A0A3R6A5C4	100	Glycosyl hydrolase	940	non_syn	Vi->A	ko:K01207,ko:K05349	Fn3-like,Glyco_hydro_3,Glyco_hydro_3_C	-	-	-	-	-	-	-	-
64	BAA_8	BAA_8_63	BAA	k77_41367	36396	sub_C	104	no_sweep	0	BAA_g43038_37	in	UniRef100_A0A3R6A5C4	100	Glycosyl hydrolase	944	syn	V->V	ko:K01207,ko:K05349	Fn3-like,Glyco_hydro_3,Glyco_hydro_3_C	-	-	-	-	-	-	-	-
64	BAA_8	BAA_8_64	BAA	k77_41367	36522	sub_T	104	no_sweep	0	BAA_g43038_37	in	UniRef100_A0A3R6A5C4	100	Glycosyl hydrolase	1070	syn	V->V	ko:K01207,ko:K05349	Fn3-like,Glyco_hydro_3,Glyco_hydro_3_C	-	-	-	-	-	-	-	-
64	BAA_8	BAA_8_65	BAA	k77_41367	36541	sub_A	104	no_sweep	0	BAA_g43038_37	in	UniRef100_A0A3R6A5C4	100	Glycosyl hydrolase	1089	non_syn	G->R	ko:K01207,ko:K05349	Fn3-like,Glyco_hydro_3,Glyco_hydro_3_C	-	-	-	-	-	-	-	-
64	BAA_8	BAA_8_66	BAA	k77_41367	36555	sub_T	104	no_sweep	0	BAA_g43038_37	in	UniRef100_A0A3R6A5C4	100	Glycosyl hydrolase	1103	syn	R->R	ko:K01207,ko:K05349	Fn3-like,Glyco_hydro_3,Glyco_hydro_3_C	-	-	-	-	-	-	-	-
64	BAA_8	BAA_8_67	BAA	k77_41367	36561	sub_G	104	no_sweep	0	BAA_g43038_37	in	UniRef100_A0A3R6A5C4	100	Glycosyl hydrolase	1109	non_syn	V->Vi	ko:K01207,ko:K05349	Fn3-like,Glyco_hydro_3,Glyco_hydro_3_C	-	-	-	-	-	-	-	-
64	BAA_8	BAA_8_68	BAA	k77_41367	36609	sub_A	104	no_sweep	0	BAA_g43038_37	in	UniRef100_A0A3R6A5C4	100	Glycosyl hydrolase	1157	syn	Q->Q	ko:K01207,ko:K05349	Fn3-like,Glyco_hydro_3,Glyco_hydro_3_C	-	-	-	-	-	-	-	-
64	BAA_8	BAA_8_69	BAA	k77_41367	36630	sub_G	104	no_sweep	0	BAA_g43038_37	in	UniRef100_A0A3R6A5C4	100	Glycosyl hydrolase	1178	syn	R->R	ko:K01207,ko:K05349	Fn3-like,Glyco_hydro_3,Glyco_hydro_3_C	-	-	-	-	-	-	-	-
64	BAA_8	BAA_8_70	BAA	k77_41367	36648	sub_C	104	no_sweep	0	BAA_g43038_37	in	UniRef100_A0A3R6A5C4	100	Glycosyl hydrolase	1196	syn	D->D	ko:K01207,ko:K05349	Fn3-like,Glyco_hydro_3,Glyco_hydro_3_C	-	-	-	-	-	-	-	-
64	BAA_8	BAA_8_71	BAA	k77_41367	36651	sub_C	104	no_sweep	0	BAA_g43038_37	in	UniRef100_A0A3R6A5C4	100	Glycosyl hydrolase	1199	syn	V->V	ko:K01207,ko:K05349	Fn3-like,Glyco_hydro_3,Glyco_hydro_3_C	-	-	-	-	-	-	-	-
64	BAA_8	BAA_8_72	BAA	k77_41367	36669	sub_G	104	no_sweep	0	BAA_g43038_37	in	UniRef100_A0A3R6A5C4	100	Glycosyl hydrolase	1217	syn	G->G	ko:K01207,ko:K05349	Fn3-like,Glyco_hydro_3,Glyco_hydro_3_C	-	-	-	-	-	-	-	-
64	BAA_8	BAA_8_73	BAA	k77_41367	36711	sub_C	104	no_sweep	0	BAA_g43038_37	in	UniRef100_A0A3R6A5C4	100	Glycosyl hydrolase	1259	syn	S->S	ko:K01207,ko:K05349	Fn3-like,Glyco_hydro_3,Glyco_hydro_3_C	-	-	-	-	-	-	-	-
64	BAA_8	BAA_8_74	BAA	k77_41367	36718	sub_C	104	no_sweep	0	BAA_g43038_37	in	UniRef100_A0A3R6A5C4	100	Glycosyl hydrolase	1266	syn	Li->Li	ko:K01207,ko:K05349	Fn3-like,Glyco_hydro_3,Glyco_hydro_3_C	-	-	-	-	-	-	-	-
64	BAA_8	BAA_8_75	BAA	k77_41367	36724	sub_A	104	no_sweep	0	BAA_g43038_37	in	UniRef100_A0A3R6A5C4	100	Glycosyl hydrolase	1272	non_syn	Q->K	ko:K01207,ko:K05349	Fn3-like,Glyco_hydro_3,Glyco_hydro_3_C	-	-	-	-	-	-	-	-
64	BAA_8	BAA_8_76	BAA	k77_41367	36738	sub_G	104	no_sweep	0	BAA_g43038_37	in	UniRef100_A0A3R6A5C4	100	Glycosyl hydrolase	1286	syn	R->R	ko:K01207,ko:K05349	Fn3-like,Glyco_hydro_3,Glyco_hydro_3_C	-	-	-	-	-	-	-	-
64	BAA_8	BAA_8_77	BAA	k77_41367	36780	sub_A	104	no_sweep	0	BAA_g43038_37	in	UniRef100_A0A3R6A5C4	100	Glycosyl hydrolase	1328	syn	V->V	ko:K01207,ko:K05349	Fn3-like,Glyco_hydro_3,Glyco_hydro_3_C	-	-	-	-	-	-	-	-
64	BAA_8	BAA_8_78	BAA	k77_41367	36798	sub_T	104	no_sweep	0	BAA_g43038_37	in	UniRef100_A0A3R6A5C4	100	Glycosyl hydrolase	1346	syn	S->S	ko:K01207,ko:K05349	Fn3-like,Glyco_hydro_3,Glyco_hydro_3_C	-	-	-	-	-	-	-	-
64	BAA_8	BAA_8_79	BAA	k77_41367	36813	sub_A	104	no_sweep	0	BAA_g43038_37	in	UniRef100_A0A3R6A5C4	100	Glycosyl hydrolase	1361	syn	P->P	ko:K01207,ko:K05349	Fn3-like,Glyco_hydro_3,Glyco_hydro_3_C	-	-	-	-	-	-	-	-
64	BAA_8	BAA_8_80	BAA	k77_41367	36819	sub_A	104	no_sweep	0	BAA_g43038_37	in	UniRef100_A0A3R6A5C4	100	Glycosyl hydrolase	1367	syn	A->A	ko:K01207,ko:K05349	Fn3-like,Glyco_hydro_3,Glyco_hydro_3_C	-	-	-	-	-	-	-	-
64	BAA_8	BAA_8_81	BAA	k77_41367	36822	sub_C	104	no_sweep	0	BAA_g43038_37	in	UniRef100_A0A3R6A5C4	100	Glycosyl hydrolase	1370	syn	D->D	ko:K01207,ko:K05349	Fn3-like,Glyco_hydro_3,Glyco_hydro_3_C	-	-	-	-	-	-	-	-
64	BAA_8	BAA_8_82	BAA	k77_41367	36823	sub_C	104	no_sweep	0	BAA_g43038_37	in	UniRef100_A0A3R6A5C4	100	Glycosyl hydrolase	1371	non_syn	K->Q	ko:K01207,ko:K05349	Fn3-like,Glyco_hydro_3,Glyco_hydro_3_C	-	-	-	-	-	-	-	-
64	BAA_8	BAA_8_83	BAA	k77_41367	36824	sub_G	104	no_sweep	0	BAA_g43038_37	in	UniRef100_A0A3R6A5C4	100	Glycosyl hydrolase	1372	non_syn	K->R	ko:K01207,ko:K05349	Fn3-like,Glyco_hydro_3,Glyco_hydro_3_C	-	-	-	-	-	-	-	-
64	BAA_8	BAA_8_84	BAA	k77_41367	36825	sub_G	104	no_sweep	0	BAA_g43038_37	in	UniRef100_A0A3R6A5C4	100	Glycosyl hydrolase	1373	syn	K->K	ko:K01207,ko:K05349	Fn3-like,Glyco_hydro_3,Glyco_hydro_3_C	-	-	-	-	-	-	-	-
64	BAA_8	BAA_8_85	BAA	k77_41367	36852	sub_A	104	no_sweep	0	BAA_g43038_37	in	UniRef100_A0A3R6A5C4	100	Glycosyl hydrolase	1400	syn	L->L	ko:K01207,ko:K05349	Fn3-like,Glyco_hydro_3,Glyco_hydro_3_C	-	-	-	-	-	-	-	-
64	BAA_8	BAA_8_86	BAA	k77_41367	36879	sub_C	104	no_sweep	0	BAA_g43038_37	in	UniRef100_A0A3R6A5C4	100	Glycosyl hydrolase	1427	syn	C->C	ko:K01207,ko:K05349	Fn3-like,Glyco_hydro_3,Glyco_hydro_3_C	-	-	-	-	-	-	-	-
64	BAA_8	BAA_8_87	BAA	k77_41367	36883	sub_T	104	no_sweep	0	BAA_g43038_37	in	UniRef100_A0A3R6A5C4	100	Glycosyl hydrolase	1431	non_syn	R->W	ko:K01207,ko:K05349	Fn3-like,Glyco_hydro_3,Glyco_hydro_3_C	-	-	-	-	-	-	-	-
64	BAA_8	BAA_8_88	BAA	k77_41367	36893	sub_T	104	no_sweep	0	BAA_g43038_37	in	UniRef100_A0A3R6A5C4	100	Glycosyl hydrolase	1441	non_syn	Y->F	ko:K01207,ko:K05349	Fn3-like,Glyco_hydro_3,Glyco_hydro_3_C	-	-	-	-	-	-	-	-
64	BAA_8	BAA_8_89	BAA	k77_41367	36897	sub_G	104	no_sweep	0	BAA_g43038_37	in	UniRef100_A0A3R6A5C4	100	Glycosyl hydrolase	1445	syn	G->G	ko:K01207,ko:K05349	Fn3-like,Glyco_hydro_3,Glyco_hydro_3_C	-	-	-	-	-	-	-	-
64	BAA_8	BAA_8_90	BAA	k77_41367	36924	sub_A	104	no_sweep	0	BAA_g43038_37	in	UniRef100_A0A3R6A5C4	100	Glycosyl hydrolase	1472	syn	A->A	ko:K01207,ko:K05349	Fn3-like,Glyco_hydro_3,Glyco_hydro_3_C	-	-	-	-	-	-	-	-
64	BAA_8	BAA_8_91	BAA	k77_41367	36962	sub_T	104	no_sweep	0	BAA_g43038_37	in	UniRef100_A0A3R6A5C4	100	Glycosyl hydrolase	1510	non_syn	Y->F	ko:K01207,ko:K05349	Fn3-like,Glyco_hydro_3,Glyco_hydro_3_C	-	-	-	-	-	-	-	-
64	BAA_8	BAA_8_92	BAA	k77_41367	36975	sub_G	104	no_sweep	0	BAA_g43038_37	in	UniRef100_A0A3R6A5C4	100	Glycosyl hydrolase	1523	syn	P->P	ko:K01207,ko:K05349	Fn3-like,Glyco_hydro_3,Glyco_hydro_3_C	-	-	-	-	-	-	-	-
64	BAA_8	BAA_8_93	BAA	k77_41367	36983	sub_A	104	no_sweep	0	BAA_g43038_37	in	UniRef100_A0A3R6A5C4	100	Glycosyl hydrolase	1531	non_syn	G->E	ko:K01207,ko:K05349	Fn3-like,Glyco_hydro_3,Glyco_hydro_3_C	-	-	-	-	-	-	-	-
64	BAA_8	BAA_8_94	BAA	k77_41367	37023	sub_T	104	no_sweep	0	BAA_g43038_37	in	UniRef100_A0A3R6A5C4	100	Glycosyl hydrolase	1571	syn	Y->Y	ko:K01207,ko:K05349	Fn3-like,Glyco_hydro_3,Glyco_hydro_3_C	-	-	-	-	-	-	-	-
64	BAA_8	BAA_8_95	BAA	k77_41367	37026	sub_T	104	no_sweep	0	BAA_g43038_37	in	UniRef100_A0A3R6A5C4	100	Glycosyl hydrolase	1574	syn	R->R	ko:K01207,ko:K05349	Fn3-like,Glyco_hydro_3,Glyco_hydro_3_C	-	-	-	-	-	-	-	-
64	BAA_8	BAA_8_96	BAA	k77_41367	37044	sub_A	104	no_sweep	0	BAA_g43038_37	in	UniRef100_A0A3R6A5C4	100	Glycosyl hydrolase	1592	syn	K->K	ko:K01207,ko:K05349	Fn3-like,Glyco_hydro_3,Glyco_hydro_3_C	-	-	-	-	-	-	-	-
64	BAA_8	BAA_8_97	BAA	k77_41367	37093	sub_A	104	no_sweep	0	BAA_g43038_37	in	UniRef100_A0A3R6A5C4	100	Glycosyl hydrolase	1641	non_syn	A->T	ko:K01207,ko:K05349	Fn3-like,Glyco_hydro_3,Glyco_hydro_3_C	-	-	-	-	-	-	-	-
64	BAA_8	BAA_8_98	BAA	k77_41367	37104	sub_T	104	no_sweep	0	BAA_g43038_37	in	UniRef100_A0A3R6A5C4	100	Glycosyl hydrolase	1652	syn	D->D	ko:K01207,ko:K05349	Fn3-like,Glyco_hydro_3,Glyco_hydro_3_C	-	-	-	-	-	-	-	-
64	BAA_8	BAA_8_99	BAA	k77_41367	37105	sub_C	104	no_sweep	0	BAA_g43038_37	in	UniRef100_A0A3R6A5C4	100	Glycosyl hydrolase	1653	syn	Li->Li	ko:K01207,ko:K05349	Fn3-like,Glyco_hydro_3,Glyco_hydro_3_C	-	-	-	-	-	-	-	-
64	BAA_8	BAA_8_100	BAA	k77_41367	37109	sub_C	104	no_sweep	0	BAA_g43038_37	in	UniRef100_A0A3R6A5C4	100	Glycosyl hydrolase	1657	non_syn	N->T	ko:K01207,ko:K05349	Fn3-like,Glyco_hydro_3,Glyco_hydro_3_C	-	-	-	-	-	-	-	-
64	BAA_8	BAA_8_101	BAA	k77_41367	37149	sub_A	104	no_sweep	0	BAA_g43038_37	in	UniRef100_A0A3R6A5C4	100	Glycosyl hydrolase	1697	syn	T->T	ko:K01207,ko:K05349	Fn3-like,Glyco_hydro_3,Glyco_hydro_3_C	-	-	-	-	-	-	-	-
64	BAA_8	BAA_8_102	BAA	k77_41367	37156	sub_C	104	no_sweep	0	BAA_g43038_37	in	UniRef100_A0A3R6A5C4	100	Glycosyl hydrolase	1704	non_syn	F->L	ko:K01207,ko:K05349	Fn3-like,Glyco_hydro_3,Glyco_hydro_3_C	-	-	-	-	-	-	-	-
64	BAA_8	BAA_8_103	BAA	k77_41367	37284	sub_G	104	no_sweep	0	BAA_g43038_37	in	UniRef100_A0A3R6A5C4	100	Glycosyl hydrolase	1832	syn	P->P	ko:K01207,ko:K05349	Fn3-like,Glyco_hydro_3,Glyco_hydro_3_C	-	-	-	-	-	-	-	-
64	BAA_8	BAA_8_104	BAA	k77_41367	37293	sub_G	104	no_sweep	0	BAA_g43038_37	in	UniRef100_A0A3R6A5C4	100	Glycosyl hydrolase	1841	syn	E->E	ko:K01207,ko:K05349	Fn3-like,Glyco_hydro_3,Glyco_hydro_3_C	-	-	-	-	-	-	-	-
64	BAA_8	BAA_8_105	BAA	k77_41367	37302	sub_A	104	no_sweep	0	BAA_g43038_37	in	UniRef100_A0A3R6A5C4	100	Glycosyl hydrolase	1850	non_syn	Vi->V	ko:K01207,ko:K05349	Fn3-like,Glyco_hydro_3,Glyco_hydro_3_C	-	-	-	-	-	-	-	-
64	BAA_8	BAA_8_106	BAA	k77_41367	37324	sub_A	104	no_sweep	0	BAA_g43038_37	in	UniRef100_A0A3R6A5C4	100	Glycosyl hydrolase	1872	non_syn	D->N	ko:K01207,ko:K05349	Fn3-like,Glyco_hydro_3,Glyco_hydro_3_C	-	-	-	-	-	-	-	-
64	BAA_8	BAA_8_107	BAA	k77_41367	37425	sub_G	104	no_sweep	0	BAA_g43038_37	in	UniRef100_A0A3R6A5C4	100	Glycosyl hydrolase	1973	syn	A->A	ko:K01207,ko:K05349	Fn3-like,Glyco_hydro_3,Glyco_hydro_3_C	-	-	-	-	-	-	-	-
64	BAA_8	BAA_8_108	BAA	k77_41367	37432	sub_G	104	no_sweep	0	BAA_g43038_37	in	UniRef100_A0A3R6A5C4	100	Glycosyl hydrolase	1980	non_syn	Ii->V	ko:K01207,ko:K05349	Fn3-like,Glyco_hydro_3,Glyco_hydro_3_C	-	-	-	-	-	-	-	-
64	BAA_8	BAA_8_109	BAA	k77_41367	37434	sub_G	104	no_sweep	0	BAA_g43038_37	in	UniRef100_A0A3R6A5C4	100	Glycosyl hydrolase	1982	non_syn	Ii->Mi	ko:K01207,ko:K05349	Fn3-like,Glyco_hydro_3,Glyco_hydro_3_C	-	-	-	-	-	-	-	-
64	BAA_8	BAA_8_110	BAA	k77_41367	37438	sub_A	104	no_sweep	0	BAA_g43038_37	in	UniRef100_A0A3R6A5C4	100	Glycosyl hydrolase	1986	non_syn	E->K	ko:K01207,ko:K05349	Fn3-like,Glyco_hydro_3,Glyco_hydro_3_C	-	-	-	-	-	-	-	-
64	BAA_8	BAA_8_111	BAA	k77_83049	19150	sub_G	104	no_sweep	0	BAA_g45817_21	downstream	UniRef100_A0A3R6GWB5	99	Lysine--tRNA ligase	1549	undefined	undefined	ko:K04567	tRNA-synt_2,tRNA_anti-codon,tRNA_bind	BAA_g45817_22	upstream	UniRef100_A0A412I9Q4	100	Transcriptional regulator	-187	undefined	undefined	-	-
64	BAA_8	BAA_8_112	BAA	k77_12627	2274	sub_G	4	no_sweep	0	BAA_g10887_1	in	UniRef100_A0A414SVP6	33.359	DUF3849 domain-containing protein	2273	non_syn	N->K	-	DUF3849,Helicase_C,ResIII,SNF2_N	-	-	-	-	-	-	-	-
64	BAA_8	BAA_8_113	BAA	k77_12627	2280	sub_C	4	no_sweep	0	BAA_g10887_1	in	UniRef100_A0A414SVP6	33.359	DUF3849 domain-containing protein	2279	syn	Ii->Ii	-	DUF3849,Helicase_C,ResIII,SNF2_N	-	-	-	-	-	-	-	-
64	BAA_8	BAA_8_114	BAA	k77_83666	1744	sub_G	4	no_sweep	0	BAA_g8675_2	in	UniRef100_D4KTG6	99.5	Glycosidases	974	syn	R->R	ko:K01208	Alpha-amylase,Alpha-amylase_N,Malt_amylase_C	-	-	-	-	-	-	-	-
64	BAA_8	BAA_8_115	BAA	k77_83666	1753	sub_G	4	no_sweep	0	BAA_g8675_2	in	UniRef100_D4KTG6	99.5	Glycosidases	983	non_syn	V->Vi	ko:K01208	Alpha-amylase,Alpha-amylase_N,Malt_amylase_C	-	-	-	-	-	-	-	-
65	BAA_9	BAA_9_1	BAA	k77_156760	8034	sub_C	71	no_sweep	0	BAA_g34241_7	in	UniRef100_A0A373IWD4	98.9	Cation-translocating P-type ATPase	900	non_syn	P->A	ko:K01537	Cation_ATPase,Cation_ATPase_C,Cation_ATPase_N,E1-E2_ATPase,Hydrolase	-	-	-	-	-	-	-	-
65	BAA_9	BAA_9_2	BAA	k77_129578	23532	sub_C	71	sweep	0	BAA_g28794_20	in	UniRef100_R5GG36	39.494	Uncharacterized protein	18	non_syn	L->F			-	-	-	-	-	-	-	-
65	BAA_9	BAA_9_3	BAA	k77_136871	4999	sub_G	71	sweep	0	BAA_g1689_7	in	UniRef100_R7EFC1	98.9	Putative bacterial type II secretion system protein F domain protein	736	non_syn	G->D	ko:K12511	T2SSF	-	-	-	-	-	-	-	-
65	BAA_9	BAA_9_4	BAA	k77_86232	30527	sub_A	71	sweep	0	BAA_g858_29	downstream	UniRef100_R7E6Q4	99.7	Phosphopentomutase	1195	undefined	undefined	ko:K01839	Metalloenzyme	BAA_g858_30	upstream	UniRef100_R7E669	100	Uncharacterized protein	-12	undefined	undefined	ko:K10914	HTH_Crp_2,cNMP_binding
65	BAA_9	BAA_9_5	BAA	k77_106808	11693	sub_G	71	no_sweep	0	BAA_g47527_14	in	UniRef100_R7EDZ4	98.5	Cell wall surface anchor family protein	613	non_syn	A->D	-	GramPos_pilinBB,Gram_pos_anchor	-	-	-	-	-	-	-	-
65	BAA_9	BAA_9_6	BAA	k77_107908	7724	sub_A	71	no_sweep	0	BAA_g12715_7	in	UniRef100_V8CDK0	56.503	Fibronectin type-III domain-containing protein	1425	non_syn	S->P	ko:K12547	Beta_helix,F5_F8_type_C,FIVAR,fn3	-	-	-	-	-	-	-	-
65	BAA_9	BAA_9_7	BAA	k77_114438	21115	ins_T	71	no_sweep	0	BAA_g29762_19	upstream	UniRef100_R7EDM8	100	Na+/phosphate symporter	-200	undefined	undefined	ko:K03324	Na_Pi_cotrans,PhoU	BAA_g29762_20	downstream	UniRef100_A0A4Q1RLJ8	99.31	Uncharacterized protein	648	undefined	undefined	-	-
65	BAA_9	BAA_9_8	BAA	k77_124852	13756	ins_AG	71	no_sweep	0	BAA_g45228_14	in	UniRef100_R6GE37	94.1	Secreted protein containing domain of murein hydrolase	361	unknown	unknown	-	Peptidase_C39_2,Peptidase_C70	-	-	-	-	-	-	-	-
65	BAA_9	BAA_9_9	BAA	k77_128297	2494	sub_C	71	no_sweep	0	BAA_g8907_3	in	UniRef100_R6H576	98.5	Uncharacterized protein	147	non_syn	Vi->Mi			-	-	-	-	-	-	-	-
65	BAA_9	BAA_9_10	BAA	k77_129578	709	del_1	71	no_sweep	0	BAA_g28794_2	in	UniRef100_R7E8N3	47.811	Peptidase_M14 domain-containing protein	517	unknown	unknown	ko:K01308	Peptidase_M14	-	-	-	-	-	-	-	-
65	BAA_9	BAA_9_11	BAA	k77_129578	710	sub_C	71	no_sweep	0	BAA_g28794_2	in	UniRef100_R7E8N3	47.811	Peptidase_M14 domain-containing protein	516	non_syn	V->F	ko:K01308	Peptidase_M14	-	-	-	-	-	-	-	-
65	BAA_9	BAA_9_12	BAA	k77_135057	11163	sub_C	71	no_sweep	0	BAA_g20055_11	downstream	UniRef100_A0A429YNC9	100	Diguanylate cyclase	591	undefined	undefined	-	Nitroreductase	BAA_g20055_12	upstream	UniRef100_R6GCU6	97.9	Putative response regulator protein GraR	-159	undefined	undefined	ko:K19082	Response_reg,Trans_reg_C
65	BAA_9	BAA_9_13	BAA	k77_151715	3610	ins_T	71	no_sweep	0	BAA_g1638_6	in	UniRef100_A0A1C6K2H5	83.443	Histidine kinase	1547	unknown	unknown	-	HATPase_c,His_kinase	-	-	-	-	-	-	-	-
65	BAA_9	BAA_9_14	BAA	k77_151715	4245	sub_C	71	no_sweep	0	BAA_g1638_6	in	UniRef100_A0A1C6K2H5	83.443	Histidine kinase	912	non_syn	E->K	-	HATPase_c,His_kinase	-	-	-	-	-	-	-	-
65	BAA_9	BAA_9_15	BAA	k77_155376	5543	sub_G	71	no_sweep	0	BAA_g11655_7	in	UniRef100_R6GJ91	99.1	Histidine kinase	957	non_syn	V->Ii	-	HATPase_c,HisKA	-	-	-	-	-	-	-	-
65	BAA_9	BAA_9_16	BAA	k77_157884	37936	sub_C	71	no_sweep	0	BAA_g6339_37	in	UniRef100_R7E975	98.7	Cation transport ATPase	1689	non_syn	V->Ii	ko:K01533,ko:K17686	E1-E2_ATPase,HMA,Hydrolase	-	-	-	-	-	-	-	-
65	BAA_9	BAA_9_17	BAA	k77_158922	12405	sub_T	71	no_sweep	0	BAA_g23651_13	in	UniRef100_A0A373N4M4	98.2	Site-specific integrase	117	non_syn	K->Q	-	Arm-DNA-bind_4,Phage_int_SAM_3,Phage_integrase	-	-	-	-	-	-	-	-
65	BAA_9	BAA_9_18	BAA	k77_161878	11454	del_1	71	no_sweep	0	BAA_g21353_11	upstream	UniRef100_R7EA24	100	Conserved domain protein	-77	undefined	undefined	ko:K06421	SASP	BAA_g21353_12	upstream	UniRef100_R7E8W6	100	Methylglyoxal synthase	-129	undefined	undefined	ko:K01734	MGS
65	BAA_9	BAA_9_19	BAA	k77_167623	16980	sub_A	71	no_sweep	0	BAA_g23250_12	in	UniRef100_R7ECZ7	99.5	CDP-alcohol phosphatidyltransferase	33	non_syn	Mi->Vi	ko:K17103	CDP-OH_P_transf	-	-	-	-	-	-	-	-
65	BAA_9	BAA_9_20	BAA	k77_167623	17499	sub_C	71	no_sweep	0	BAA_g23250_12	in	UniRef100_R7ECZ7	99.5	CDP-alcohol phosphatidyltransferase	552	non_syn	P->T	ko:K17103	CDP-OH_P_transf	-	-	-	-	-	-	-	-
65	BAA_9	BAA_9_21	BAA	k77_167623	19299	sub_G	71	no_sweep	0	BAA_g23250_14	downstream	UniRef100_A0A429YP64	100	Epoxyqueuosine reductase QueH	709	undefined	undefined	ko:K09765	DUF208	BAA_g23250_15	upstream	UniRef100_A0A4Q1RGV0	100	Argininosuccinate lyase	-111	undefined	undefined	ko:K01755,ko:K14681	ASL_C2,Acetyltransf_1,Lyase_1
65	BAA_9	BAA_9_22	BAA	k77_168564	30553	sub_A	71	no_sweep	0	BAA_g37489_27	upstream	UniRef100_R6G864	56.241	Uncharacterized protein	-48	undefined	undefined			BAA_g37489_28	upstream	UniRef100_R7ED72	100	Cysteine synthase	-63	undefined	undefined	ko:K01738	PALP
65	BAA_9	BAA_9_23	BAA	k77_168564	37290	sub_A	71	no_sweep	0	BAA_g37489_33	in	UniRef100_R7EAT4	100	Ribonuclease Y	976	non_syn	H->R	ko:K18682	DUF3552,HD,KH_1	-	-	-	-	-	-	-	-
65	BAA_9	BAA_9_24	BAA	k77_181709	5761	sub_G	71	no_sweep	0	BAA_g7637_8	in	UniRef100_A0A3R9Y758	99.8	Histidine kinase	724	non_syn	T->Mi	-	HAMP,HATPase_c,HisKA	-	-	-	-	-	-	-	-
65	BAA_9	BAA_9_25	BAA	k77_181709	5909	sub_A	71	no_sweep	0	BAA_g7637_8	in	UniRef100_A0A3R9Y758	99.8	Histidine kinase	576	non_syn	C->R	-	HAMP,HATPase_c,HisKA	-	-	-	-	-	-	-	-
65	BAA_9	BAA_9_26	BAA	k77_26379	26084	sub_A	71	no_sweep	0	BAA_g44584_25	in	UniRef100_R7EAX0	99.4	Lipoprotein signal peptidase	16	non_syn	K->R	ko:K03101	Peptidase_A8	-	-	-	-	-	-	-	-
65	BAA_9	BAA_9_27	BAA	k77_44953	3113	sub_T	71	no_sweep	0	BAA_g6401_3	in	UniRef100_R7EDN2	90.337	HTH deoR-type domain-containing protein	314	syn	A->A	ko:K03436	DeoRC,HTH_DeoR	-	-	-	-	-	-	-	-
65	BAA_9	BAA_9_28	BAA	k77_7052	19001	sub_A	71	no_sweep	0	BAA_g19282_17	in	UniRef100_A0A1C6DUC4	99.5	Preprotein translocase subunit Sec63	113	syn	P->P	-	DnaJ	-	-	-	-	-	-	-	-
65	BAA_9	BAA_9_29	BAA	k77_76964	59046	sub_C	71	no_sweep	0	BAA_g45351_51	in	UniRef100_A0A373ITH5	97.8	DNA helicase	884	non_syn	E->D	ko:K03657	AAA_19,DUF4968,UvrD-helicase,UvrD_C,UvrD_C_2	-	-	-	-	-	-	-	-
65	BAA_9	BAA_9_30	BAA	k77_86232	23711	sub_C	71	no_sweep	0	BAA_g858_23	in	UniRef100_R7E7X5	100	ABC transporter ATP-binding protein	13	non_syn	A->V	ko:K02056	ABC_tran	-	-	-	-	-	-	-	-
65	BAA_9	BAA_9_31	BAA	k77_90147	5650	sub_G	71	no_sweep	0	BAA_g13994_7	in	UniRef100_R7EBH9	100	NTP_transferase domain-containing protein	1088	syn	V->V	ko:K00975	Hexapep,NTP_transferase	-	-	-	-	-	-	-	-
65	BAA_9	BAA_9_32	BAA	k77_93777	3533	sub_T	71	no_sweep	0	BAA_g27316_5	downstream	UniRef100_R7EEH1	83.726	Altronate oxidoreductase	592	undefined	undefined	ko:K00041	Mannitol_dh,Mannitol_dh_C	BAA_g27316_6	downstream	UniRef100_R7EAF0	99.5	6-O-methylguanine DNA methyltransferase DNA binding domain protein	756	undefined	undefined	-	YjbR
65	BAA_9	BAA_9_33	BAA	k77_107590	7428	sub_G	71	sweep	0	BAA_g7543_8	in	UniRef100_A0A4Q1RH66	100	Folate family ECF transporter S component	158	non_syn	Li->L	-	-	-	-	-	-	-	-	-	-
65	BAA_9	BAA_9_34	BAA	k77_136255	764	sub_C	71	sweep	0	BAA_g37788_1	in	UniRef100_R7EEA5	97.6	PGA_cap domain-containing protein	527	syn	T->T	ko:K07282	PGA_cap	-	-	-	-	-	-	-	-
65	BAA_9	BAA_9_35	BAA	k77_140935	3086	sub_C	71	sweep	0	BAA_g18155_5	in	UniRef100_A0A4Q1RJI9	100	Thioredoxin	65	non_syn	Li->L	ko:K03671	Thioredoxin	-	-	-	-	-	-	-	-
65	BAA_9	BAA_9_36	BAA	k77_157884	30591	sub_G	71	sweep	0	BAA_g6339_30	in	UniRef100_R7E7H2	96.1	RNase_H_2 domain-containing protein	113	non_syn	K->N	ko:K07502	RNase_H_2	-	-	-	-	-	-	-	-
65	BAA_9	BAA_9_37	BAA	k77_158695	6370	sub_C	71	sweep	0	BAA_g20171_5	in	UniRef100_R7EA84	97.987	Dihydroxy-acid dehydratase	1443	syn	Li->Li	ko:K01687	ILVD_EDD	-	-	-	-	-	-	-	-
65	BAA_9	BAA_9_38	BAA	k77_168564	14358	sub_C	71	sweep	0	BAA_g37489_13	in	UniRef100_A0A4Q1RID1	99.3	Flavodoxin	400	non_syn	A->V	-	Flavodoxin_1	-	-	-	-	-	-	-	-
65	BAA_9	BAA_9_39	BAA	k77_170227	2648	sub_G	71	sweep	0	BAA_g16134_2	upstream	UniRef100_A0A4Q1RGC1	99.4	TRAP transporter small permease	-382	undefined	undefined	-	DctQ	BAA_g16134_3	downstream	UniRef100_A0A4Q1RGB2	100	YdcF family protein	810	undefined	undefined	-	DUF218
65	BAA_9	BAA_9_40	BAA	k77_186835	10270	sub_A	71	sweep	0	BAA_g42434_9	in	UniRef100_A0A4Q1RFH6	99.1	Uncharacterized protein	485	syn	K->K			-	-	-	-	-	-	-	-
65	BAA_9	BAA_9_41	BAA	k77_103744	16010	sub_A	71	no_sweep	0	BAA_g41780_14	downstream	UniRef100_A0A416P5C0	98.8	Sigma70_r3 domain-containing protein	1104	undefined	undefined	ko:K03086	Sigma70_r2	BAA_g41780_15	upstream	na	-1	na	-106	undefined	undefined
65	BAA_9	BAA_9_42	BAA	k77_106229	8253	sub_C	71	no_sweep	0	-	-	-	-	-	-	-	-			-	-	-	-	-	-	-	-
65	BAA_9	BAA_9_43	BAA	k77_106808	17327	sub_G	71	no_sweep	0	BAA_g47527_16	in	UniRef100_A0A4Q1RJZ5	76.441	MATE family efflux transporter	192	non_syn	G->S	-	MatE	-	-	-	-	-	-	-	-
65	BAA_9	BAA_9_44	BAA	k77_128674	2976	sub_T	71	no_sweep	0	BAA_g15323_3	in	UniRef100_R6GF15	98.6	PIN7 domain-containing protein	736	non_syn	Q->P	-	-	-	-	-	-	-	-	-	-
65	BAA_9	BAA_9_45	BAA	k77_129578	25532	sub_C	71	no_sweep	0	BAA_g28794_22	in	UniRef100_UPI00085C5943	93.2	glycosyltransferase family 4 protein	336	non_syn	P->S	-	Glyco_transf_4,Glycos_transf_1	-	-	-	-	-	-	-	-
65	BAA_9	BAA_9_46	BAA	k77_12984	13834	sub_T	71	no_sweep	0	BAA_g16874_12	in	UniRef100_R7EHJ5	99.7	Uncharacterized protein	616	non_syn	V->A	ko:K11069	BPD_transp_1,SBP_bac_6,SBP_bac_8	-	-	-	-	-	-	-	-
65	BAA_9	BAA_9_47	BAA	k77_136038	13484	sub_G	71	no_sweep	0	BAA_g34994_11	in	UniRef100_R7E7K0	99	DegV family protein	561	non_syn	N->D	-	DegV	-	-	-	-	-	-	-	-
65	BAA_9	BAA_9_48	BAA	k77_148014	7316	sub_A	71	no_sweep	0	BAA_g39939_5	downstream	UniRef100_A0A1C6INV0	90.623	Uncharacterized protein	1856	undefined	undefined	-	fn3	BAA_g39939_6	upstream	UniRef100_A0A4Q1RKB3	100	Hsp20/alpha crystallin family protein	-143	undefined	undefined	-	HSP20
65	BAA_9	BAA_9_49	BAA	k77_149290	11671	sub_A	71	no_sweep	0	BAA_g10534_8	in	UniRef100_R7EJB3	99.4	Uncharacterized protein	232	non_syn	E->G	ko:K00845	ROK	-	-	-	-	-	-	-	-
65	BAA_9	BAA_9_50	BAA	k77_157884	43828	sub_A	71	no_sweep	0	BAA_g6339_41	in	UniRef100_R7E837	99.4	Putative glycogen debranching enzyme GlgX	334	non_syn	Ii->T	ko:K01214	Alpha-amylase,CBM_48	-	-	-	-	-	-	-	-
65	BAA_9	BAA_9_51	BAA	k77_168564	69185	sub_A	71	no_sweep	0	BAA_g37489_62	in	UniRef100_R7ED12	99.4	Uncharacterized protein	276	non_syn	K->E	ko:K06391	Spore_III_AB	-	-	-	-	-	-	-	-
65	BAA_9	BAA_9_52	BAA	k77_172210	2071	sub_T	71	no_sweep	0	BAA_g47214_2	in	UniRef100_A0A4Q1REV2	99.7	Metallophosphoesterase	796	non_syn	Li->P	ko:K07098	Metallophos	-	-	-	-	-	-	-	-
65	BAA_9	BAA_9_53	BAA	k77_173505	22683	sub_T	71	no_sweep	0	BAA_g18033_24	upstream	UniRef100_A0A4Q1RFP7	100	Ribosomal protein L11 methyltransferase	-36	undefined	undefined	ko:K02687	PrmA	BAA_g18033_25	downstream	UniRef100_A0A416P2X6	47.222	Uncharacterized protein	265	undefined	undefined
65	BAA_9	BAA_9_54	BAA	k77_177879	16804	sub_G	71	no_sweep	0	BAA_g39351_15	upstream	UniRef100_R7E8A1	99.3	Uncharacterized protein	-44	undefined	undefined	-	-	BAA_g39351_16	downstream	UniRef100_R7EAE6	100	Elongation factor P	708	undefined	undefined	ko:K02356	EFP,EFP_N,Elong-fact-P_C
65	BAA_9	BAA_9_55	BAA	k77_177980	1555	sub_A	71	no_sweep	0	BAA_g41929_1	downstream	UniRef100_R7E9S0	99.2	Ribosomal RNA small subunit methyltransferase G	1395	undefined	undefined	ko:K03501	GidB	BAA_g41929_2	upstream	UniRef100_A0A4Q1RL81	99.7	ABC transporter ATP-binding protein	-10	undefined	undefined	ko:K01990	ABC_tran
65	BAA_9	BAA_9_56	BAA	k77_182873	1421	sub_G	71	no_sweep	0	BAA_g25316_2	in	UniRef100_UPI0012B223A2	99.2	alpha-N-arabinofuranosidase	782	syn	T->T	ko:K01209	Alpha-L-AF_C	-	-	-	-	-	-	-	-
65	BAA_9	BAA_9_57	BAA	k77_19473	19420	sub_A	71	no_sweep	0	BAA_g21704_19	in	UniRef100_UPI000E503137	52.101	DNA-directed RNA polymerase subunit beta	542	non_syn	K->N	ko:K03043	RNA_pol_Rpb2_1,RNA_pol_Rpb2_2,RNA_pol_Rpb2_3,RNA_pol_Rpb2_45,RNA_pol_Rpb2_6,RNA_pol_Rpb2_7	-	-	-	-	-	-	-	-
65	BAA_9	BAA_9_58	BAA	k77_35628	31593	sub_A	71	no_sweep	0	BAA_g46046_30	in	UniRef100_A0A4Q1RJ81	96.5	GRAM_POS_ANCHORING domain-containing protein	4274	syn	N->N	-	ESPR,Glug,Haemagg_act	-	-	-	-	-	-	-	-
65	BAA_9	BAA_9_59	BAA	k77_397	2301	sub_G	71	no_sweep	0	BAA_g3076_2	in	UniRef100_R7EA51	99.7	Uncharacterized protein	555	non_syn	D->Y	-	DUF3878	-	-	-	-	-	-	-	-
65	BAA_9	BAA_9_60	BAA	k77_60840	3825	sub_G	71	no_sweep	0	BAA_g20578_3	in	UniRef100_A0A4Q1RG84	98.6	LacI family transcriptional regulator	487	non_syn	G->D	ko:K03484	LacI,Peripla_BP_1,Peripla_BP_3	-	-	-	-	-	-	-	-
65	BAA_9	BAA_9_61	BAA	k77_75861	26288	sub_A	71	no_sweep	0	BAA_g26485_28	in	UniRef100_A0A4Q1RH96	98.8	XRE family transcriptional regulator	148	non_syn	Li->R	-	HTH_19,HTH_3	-	-	-	-	-	-	-	-
65	BAA_9	BAA_9_62	BAA	k77_76964	16066	sub_C	71	no_sweep	0	BAA_g45351_14	in	UniRef100_A0A4V1NRW4	99.8	Uracil-xanthine permease	312	non_syn	G->C	ko:K02824	Xan_ur_permease	-	-	-	-	-	-	-	-
65	BAA_9	BAA_9_63	BAA	k77_82202	6281	sub_G	71	no_sweep	0	BAA_g33506_4	in	UniRef100_A0A4Q1RJE1	99.9	UvrABC system protein A	2648	non_syn	Li->L	ko:K03701	ABC_tran	-	-	-	-	-	-	-	-
65	BAA_9	BAA_9_64	BAA	k77_82202	13315	sub_G	71	no_sweep	0	BAA_g33506_11	in	UniRef100_A0A4Q1RJB7	99.5	Uncharacterized protein	407	non_syn	K->N	-	YbbR	-	-	-	-	-	-	-	-
65	BAA_9	BAA_9_65	BAA	k77_84740	3155	sub_C	71	no_sweep	0	BAA_g32138_3	in	UniRef100_A0A4Q1REG5	97	Leucine-rich repeat domain-containing protein	295	non_syn	A->Vi	-	FMN_bind,LRR_5	-	-	-	-	-	-	-	-
65	BAA_9	BAA_9_66	BAA	k77_84740	3437	sub_C	71	no_sweep	0	BAA_g32138_3	in	UniRef100_A0A4Q1REG5	97	Leucine-rich repeat domain-containing protein	577	non_syn	S->F	-	FMN_bind,LRR_5	-	-	-	-	-	-	-	-
65	BAA_9	BAA_9_67	BAA	k77_86232	18987	sub_G	71	no_sweep	0	BAA_g858_19	in	UniRef100_A0A416RPE5	98	Sodium-dependent transporter	562	non_syn	S->Ii	ko:K03308	SNF	-	-	-	-	-	-	-	-
65	BAA_9	BAA_9_68	BAA	k77_86250	40072	ins_G	71	no_sweep	0	BAA_g2060_31	in	UniRef100_A0A4Q1RIL7	20.575	Uncharacterized protein	819	unknown	unknown	ko:K01114,ko:K15125	Big_2,PA14	-	-	-	-	-	-	-	-
65	BAA_9	BAA_9_69	BAA	k77_86250	40138	sub_A	71	no_sweep	0	BAA_g2060_31	in	UniRef100_A0A4Q1RIL7	20.575	Uncharacterized protein	753	non_syn	*->Q	ko:K01114,ko:K15125	Big_2,PA14	-	-	-	-	-	-	-	-
65	BAA_9	BAA_9_70	BAA	k77_91029	7336	sub_C	71	no_sweep	0	BAA_g29972_7	upstream	UniRef100_R7EF85	21.922	Sporulation related protein	-106	undefined	undefined			BAA_g29972_8	upstream	UniRef100_A0A1C5YE71	98.7	Fatty acid-binding protein TM_1468	-48	undefined	undefined	-	DegV
65	BAA_9	BAA_9_71	BAA	k77_96794	21615	sub_A	71	no_sweep	0	BAA_g26079_18	in	UniRef100_A0A4Q1RFG3	99.1	GAF domain-containing sensor histidine kinase	234	non_syn	*->Q	-	GAF,HATPase_c,HisKA,PAS_9,Response_reg	-	-	-	-	-	-	-	-
65	BAA_9	BAA_9_72	BAA	k77_103744	6081	sub_C	3	sweep	0	BAA_g41780_7	in	UniRef100_R7E9X1	98.3	Uncharacterized protein	221	syn	S->S	-	-	-	-	-	-	-	-	-	-
65	BAA_9	BAA_9_73	BAA	k77_104707	5671	sub_T	3	sweep	0	BAA_g15851_5	in	UniRef100_A0A4Q1RFZ4	99.6	UDP-N-acetylmuramoyl-L-alanyl-D-glutamate--2,6-diaminopimelate ligase	1301	syn	D->D	ko:K01928	Mur_ligase,Mur_ligase_C,Mur_ligase_M	-	-	-	-	-	-	-	-
65	BAA_9	BAA_9_74	BAA	k77_107992	6908	sub_A	3	sweep	0	BAA_g15549_9	in	UniRef100_A0A417HZI7	23.718	WG repeat-containing protein	630	non_syn	V->Ii	ko:K01771	CW_binding_1,Flg_new,WG_beta_rep	-	-	-	-	-	-	-	-
65	BAA_9	BAA_9_75	BAA	k77_29051	7296	sub_C	1	no_sweep	0	BAA_g33617_6	in	UniRef100_A0A414SR40	97.7	ATP-binding protein	369	syn	Li->Li	ko:K07133	AAA_14,DUF4143	-	-	-	-	-	-	-	-
66	BAA_13	BAA_13_1	BAA	k77_123320	17073	ins_C	2	no_sweep	0	BAA_g23297_14	in	UniRef100_R7HDJ0	43.416	YitT family protein	364	unknown	unknown	-	DUF2179,YitT_membrane	-	-	-	-	-	-	-	-
66	BAA_13	BAA_13_2	BAA	k77_62509	36149	ins_G	2	no_sweep	0	BAA_g1515_31	in	UniRef100_R7HA42	27.948	Methyl-accepting chemotaxis protein	393	unknown	unknown	ko:K03406	MCPsignal	-	-	-	-	-	-	-	-
66	BAA_13	BAA_13_3	BAA	k77_138091	1319	sub_G	17	no_sweep	0	BAA_g20264_1	in	UniRef100_A0A173X082	100	Tyrosine recombinase XerC	1259	non_syn	V->Vi	-	Phage_int_SAM_4,Phage_integrase	-	-	-	-	-	-	-	-
66	BAA_13	BAA_13_4	BAA	k77_138091	1322	sub_T	17	no_sweep	0	BAA_g20264_1	in	UniRef100_A0A173X082	100	Tyrosine recombinase XerC	1262	syn	C->C	-	Phage_int_SAM_4,Phage_integrase	-	-	-	-	-	-	-	-
66	BAA_13	BAA_13_5	BAA	k77_138091	1370	sub_A	17	no_sweep	0	BAA_g20264_1	in	UniRef100_A0A173X082	100	Tyrosine recombinase XerC	1310	non_syn	Li->L	-	Phage_int_SAM_4,Phage_integrase	-	-	-	-	-	-	-	-
66	BAA_13	BAA_13_6	BAA	k77_138091	1407	sub_G	17	no_sweep	0	BAA_g20264_1	in	UniRef100_A0A173X082	100	Tyrosine recombinase XerC	1347	non_syn	Ii->V	-	Phage_int_SAM_4,Phage_integrase	-	-	-	-	-	-	-	-
66	BAA_13	BAA_13_7	BAA	k77_138091	1804	sub_A	17	no_sweep	0	BAA_g20264_2	in	UniRef100_A0A173X0R9	99.8	Site-specific recombinase XerD	6	non_syn	E->K	-	Phage_integrase	-	-	-	-	-	-	-	-
66	BAA_13	BAA_13_8	BAA	k77_138091	1923	sub_A	17	no_sweep	0	BAA_g20264_2	in	UniRef100_A0A173X0R9	99.8	Site-specific recombinase XerD	125	non_syn	N->K	-	Phage_integrase	-	-	-	-	-	-	-	-
66	BAA_13	BAA_13_9	BAA	k77_138091	1945	sub_G	17	no_sweep	0	BAA_g20264_2	in	UniRef100_A0A173X0R9	99.8	Site-specific recombinase XerD	147	non_syn	N->D	-	Phage_integrase	-	-	-	-	-	-	-	-
66	BAA_13	BAA_13_10	BAA	k77_138091	1947	sub_A	17	no_sweep	0	BAA_g20264_2	in	UniRef100_A0A173X0R9	99.8	Site-specific recombinase XerD	149	non_syn	N->K	-	Phage_integrase	-	-	-	-	-	-	-	-
66	BAA_13	BAA_13_11	BAA	k77_138091	2109	sub_G	17	no_sweep	0	BAA_g20264_2	in	UniRef100_A0A173X0R9	99.8	Site-specific recombinase XerD	311	syn	G->G	-	Phage_integrase	-	-	-	-	-	-	-	-
66	BAA_13	BAA_13_12	BAA	k77_138091	2112	sub_G	17	no_sweep	0	BAA_g20264_2	in	UniRef100_A0A173X0R9	99.8	Site-specific recombinase XerD	314	syn	Q->Q	-	Phage_integrase	-	-	-	-	-	-	-	-
66	BAA_13	BAA_13_13	BAA	k77_138091	2135	sub_G	17	no_sweep	0	BAA_g20264_2	in	UniRef100_A0A173X0R9	99.8	Site-specific recombinase XerD	337	non_syn	N->S	-	Phage_integrase	-	-	-	-	-	-	-	-
66	BAA_13	BAA_13_14	BAA	k77_138091	2586	sub_C	17	no_sweep	0	BAA_g20264_2	in	UniRef100_A0A173X0R9	99.8	Site-specific recombinase XerD	788	syn	Ii->Ii	-	Phage_integrase	-	-	-	-	-	-	-	-
66	BAA_13	BAA_13_15	BAA	k77_138091	2775	sub_C	17	no_sweep	0	BAA_g20264_2	in	UniRef100_A0A173X0R9	99.8	Site-specific recombinase XerD	977	syn	S->S	-	Phage_integrase	-	-	-	-	-	-	-	-
66	BAA_13	BAA_13_16	BAA	k77_138091	2787	sub_C	17	no_sweep	0	BAA_g20264_2	in	UniRef100_A0A173X0R9	99.8	Site-specific recombinase XerD	989	syn	T->T	-	Phage_integrase	-	-	-	-	-	-	-	-
66	BAA_13	BAA_13_17	BAA	k77_138091	2859	sub_C	17	no_sweep	0	BAA_g20264_2	in	UniRef100_A0A173X0R9	99.8	Site-specific recombinase XerD	1061	syn	T->T	-	Phage_integrase	-	-	-	-	-	-	-	-
66	BAA_13	BAA_13_18	BAA	k77_138091	3341	sub_C	17	no_sweep	0	BAA_g20264_3	in	UniRef100_A0A414QQY1	99.2	Uncharacterized protein	60	syn	R->R	-	-	-	-	-	-	-	-	-	-
66	BAA_13	BAA_13_19	BAA	k77_138091	4224	sub_A	17	no_sweep	0	BAA_g20264_4	in	UniRef100_A0A173WY87	100	Predicted P-loop ATPase	397	non_syn	R->K	-	KAP_NTPase	-	-	-	-	-	-	-	-
66	BAA_13	BAA_13_20	BAA	k77_5527	850	sub_A	9	no_sweep	0	BAA_g40319_3	in	UniRef100_R7HCK3	100	Putative permease	990	non_syn	Mi->Li	ko:K07089	ArsP_1	-	-	-	-	-	-	-	-
66	BAA_13	BAA_13_21	BAA	k77_5527	856	sub_T	9	no_sweep	0	BAA_g40319_3	in	UniRef100_R7HCK3	100	Putative permease	984	non_syn	Y->N	ko:K07089	ArsP_1	-	-	-	-	-	-	-	-
66	BAA_13	BAA_13_22	BAA	k77_187484	15113	sub_T	9	no_sweep	0	BAA_g3742_13	in	na	-1	na	90	non_syn	Q->*			-	-	-	-	-	-	-	-
66	BAA_13	BAA_13_23	BAA	k77_71450	587	sub_A	9	no_sweep	0	BAA_g1178_2	in	UniRef100_C4Z2T0	99.5	50S ribosomal protein L3	323	syn	V->V	ko:K02906	Ribosomal_L3	-	-	-	-	-	-	-	-
66	BAA_13	BAA_13_24	BAA	k77_9930	8219	sub_T	9	no_sweep	0	BAA_g14876_5	downstream	UniRef100_R7H7F8	99.8	Uncharacterized protein	2123	undefined	undefined	-	CobT_C	-	-	-	-	-	-	-	-
66	BAA_13	BAA_13_25	BAA	k77_9930	8225	sub_A	9	no_sweep	0	BAA_g14876_5	downstream	UniRef100_R7H7F8	99.8	Uncharacterized protein	2129	undefined	undefined	-	CobT_C	-	-	-	-	-	-	-	-
66	BAA_13	BAA_13_26	BAA	k77_9930	8235	sub_G	9	no_sweep	0	BAA_g14876_5	downstream	UniRef100_R7H7F8	99.8	Uncharacterized protein	2139	undefined	undefined	-	CobT_C	-	-	-	-	-	-	-	-
66	BAA_13	BAA_13_27	BAA	k77_9930	8435	sub_C	9	no_sweep	0	BAA_g14876_5	downstream	UniRef100_R7H7F8	99.8	Uncharacterized protein	2339	undefined	undefined	-	CobT_C	-	-	-	-	-	-	-	-
66	BAA_13	BAA_13_28	BAA	k77_9930	8518	sub_G	9	no_sweep	0	BAA_g14876_5	downstream	UniRef100_R7H7F8	99.8	Uncharacterized protein	2422	undefined	undefined	-	CobT_C	-	-	-	-	-	-	-	-
66	BAA_13	BAA_13_29	BAA	k77_71358	3387	sub_G	1	no_sweep	0	BAA_g285_6	in	UniRef100_UPI0012B3BCA8	95.127	tyrosine-type recombinase/integrase	239	syn	T->T	-	Arm-DNA-bind_4,Phage_int_SAM_3,Phage_integrase	-	-	-	-	-	-	-	-
67	BAA_14	BAA_14_1	BAA	k77_104082	2856	sub_C	21	sweep	0	BAA_g623_4	in	UniRef100_C0EYP8	70.698	ATPase/histidine kinase/DNA gyrase B/HSP90 domain protein	862	non_syn	S->Y	-	HAMP,HATPase_c,HisKA	-	-	-	-	-	-	-	-
67	BAA_14	BAA_14_2	BAA	k77_157728	9434	sub_T	21	sweep	0	BAA_g2837_9	in	UniRef100_C0EXS6	88.578	Peptidase, M56 family	1	non_syn	E->Vi	-	Peptidase_M23,Peptidase_M56	-	-	-	-	-	-	-	-
67	BAA_14	BAA_14_3	BAA	k77_157728	9616	sub_C	21	sweep	0	BAA_g2837_10	downstream	UniRef100_A0A174KLD9	100	MarR family	787	undefined	undefined	-	HTH_27,MarR,MarR_2	BAA_g2837_9	upstream	UniRef100_C0EXS6	88.578	Peptidase, M56 family	-181	undefined	undefined	-	Peptidase_M23,Peptidase_M56
67	BAA_14	BAA_14_4	BAA	k77_158477	3770	sub_T	21	sweep	0	BAA_g16246_4	in	UniRef100_A0A173RLB5	99	Pheromone autoinducer 2 transporter	515	syn	N->N	-	AI-2E_transport	-	-	-	-	-	-	-	-
67	BAA_14	BAA_14_5	BAA	k77_146488	1026	sub_G	21	no_sweep	0	BAA_g15464_1	in	UniRef100_A0A173S7U8	99.7	Lactaldehyde reductase	304	non_syn	T->Ii	ko:K00048	Fe-ADH	-	-	-	-	-	-	-	-
67	BAA_14	BAA_14_6	BAA	k77_19113	2444	sub_G	21	no_sweep	0	BAA_g16734_4	downstream	UniRef100_C0EXN2	99.5	Uncharacterized protein	690	undefined	undefined	-	PrsW-protease	BAA_g16734_5	upstream	UniRef100_A0A415TQW6	98.1	Uncharacterized protein	-153	undefined	undefined	-	-
67	BAA_14	BAA_14_7	BAA	k77_2063	1653	sub_T	21	no_sweep	0	BAA_g25515_2	in	UniRef100_A0A174EEZ8	99.8	L-lactate permease	390	non_syn	S->A	ko:K03303	Lactate_perm	-	-	-	-	-	-	-	-
67	BAA_14	BAA_14_8	BAA	k77_24330	6927	sub_C	21	no_sweep	0	BAA_g9205_10	in	UniRef100_C0EYZ8	100	MATE efflux family protein	101	syn	N->N	-	MatE	-	-	-	-	-	-	-	-
67	BAA_14	BAA_14_9	BAA	k77_27510	5657	sub_G	21	no_sweep	0	BAA_g11766_6	in	UniRef100_C0EW22	100	Lantibiotic protection ABC transporter permease subunit, MutE/EpiE family	290	non_syn	D->E	ko:K20491	ABC2_membrane_4	-	-	-	-	-	-	-	-
67	BAA_14	BAA_14_10	BAA	k77_88979	2864	ins_GG	21	no_sweep	0	BAA_g47453_3	downstream	UniRef100_A0A374NPC5	100	Amino acid ABC transporter ATP-binding protein	928	undefined	undefined	ko:K02028	ABC_tran	BAA_g47453_4	upstream	UniRef100_A0A415U8X2	99.8	EAL domain-containing protein	-130	undefined	undefined	-	EAL,GGDEF,Peptidase_S51,Response_reg,SBP_bac_3
67	BAA_14	BAA_14_11	BAA	k77_88979	15206	sub_A	21	no_sweep	0	BAA_g47453_13	upstream	UniRef100_A0A174JVM4	100	HTH-type transcriptional regulator lrpC	-342	undefined	undefined	ko:K03719	AsnC_trans_reg,HTH_24,HTH_AsnC-type	BAA_g47453_14	downstream	UniRef100_A0A173T5N9	100	Glutamate dehydrogenase	1350	undefined	undefined	ko:K00261,ko:K00262	ELFV_dehydrog,ELFV_dehydrog_N
67	BAA_14	BAA_14_12	BAA	k77_104763	9013	sub_C	21	sweep	0	BAA_g17499_8	in	UniRef100_A0A173UIV0	99.9	Alpha-1,4 glucan phosphorylase	350	syn	G->G	ko:K00688	Phosphorylase	-	-	-	-	-	-	-	-
67	BAA_14	BAA_14_13	BAA	k77_110846	27287	sub_A	21	sweep	0	BAA_g15822_27	in	UniRef100_R6G7C1	100	DHHA1 domain protein	198	non_syn	Ii->V	ko:K06881	DHH,DHHA1	-	-	-	-	-	-	-	-
67	BAA_14	BAA_14_14	BAA	k77_157401	20137	sub_C	21	sweep	0	BAA_g43902_16	in	UniRef100_A0A173SZV6	99.3	MarR family transcriptional regulator	366	non_syn	G->R	-	MarR,MarR_2	-	-	-	-	-	-	-	-
67	BAA_14	BAA_14_15	BAA	k77_88979	5600	sub_G	21	sweep	0	BAA_g47453_4	in	UniRef100_A0A415U8X2	99.8	EAL domain-containing protein	2606	non_syn	Mi->Ii	-	EAL,GGDEF,Peptidase_S51,Response_reg,SBP_bac_3	-	-	-	-	-	-	-	-
67	BAA_14	BAA_14_16	BAA	k77_154792	10944	sub_T	21	no_sweep	0	BAA_g3574_9	in	UniRef100_A0A174DVE4	100	DUF3794 domain-containing protein	479	syn	S->S	-	DUF3794,LysM	-	-	-	-	-	-	-	-
67	BAA_14	BAA_14_17	BAA	k77_154792	21062	sub_C	21	no_sweep	0	BAA_g3574_18	in	UniRef100_A0A174DUM7	99.5	Stage II sporulation protein R	463	non_syn	T->Ii	ko:K06387	Spore_II_R	-	-	-	-	-	-	-	-
67	BAA_14	BAA_14_18	BAA	k77_154792	22050	sub_G	21	no_sweep	0	BAA_g3574_19	in	UniRef100_A0A413Q206	99.7	Transglutaminase domain-containing protein	685	non_syn	S->T	-	Transglut_core	-	-	-	-	-	-	-	-
67	BAA_14	BAA_14_19	BAA	k77_155638	12242	sub_C	21	no_sweep	0	BAA_g15483_12	in	UniRef100_A0A174KMU9	99.7	Exopolyphosphatase	367	non_syn	T->S	ko:K01524	HD,Ppx-GppA	-	-	-	-	-	-	-	-
67	BAA_14	BAA_14_20	BAA	k77_77805	317	ins_C	21	no_sweep	0	BAA_g8476_2	in	UniRef100_A0A3R6QJH2	66.127	Uncharacterized protein (Fragment)	78	unknown	unknown	-	HATPase_c,HisKA,Response_reg	-	-	-	-	-	-	-	-
67	BAA_14	BAA_14_21	BAA	k77_88979	13537	sub_A	21	no_sweep	0	BAA_g47453_11	downstream	UniRef100_A0A1C5NWZ1	100	Cysteine desulfurase	1293	undefined	undefined	ko:K04487	Aminotran_5	BAA_g47453_12	upstream	UniRef100_A0A415G9F9	100	Uncharacterized protein	-243	undefined	undefined	ko:K00783	MDMPI_N,SPOUT_MTase
67	BAA_14	BAA_14_22	BAA	k77_163536	676	sub_G	17	sweep	0	BAA_g487_1	in	UniRef100_A0A1C5YZX7	99.9	Glycogen synthase	554	syn	E->E	-	Glyco_transf_5,Glycos_transf_1	-	-	-	-	-	-	-	-
67	BAA_14	BAA_14_23	BAA	k77_171447	7732	sub_G	17	sweep	0	BAA_g38622_8	in	UniRef100_A0A174CWY8	100	FUSC family protein	281	syn	F->F	-	FUSC_2	-	-	-	-	-	-	-	-
67	BAA_14	BAA_14_24	BAA	k77_176873	8932	sub_G	17	sweep	0	BAA_g23688_5	upstream	UniRef100_A0A173RLE8	99.8	Acetate kinase	-209	undefined	undefined	ko:K00925	Acetate_kinase	BAA_g23688_6	upstream	UniRef100_C0EXQ8	98.998	tRNA(Met) cytidine acetate ligase	-128	undefined	undefined	-	HIGH_NTase1
67	BAA_14	BAA_14_25	BAA	k77_69055	1191	ins_T	17	sweep	0	BAA_g10047_1	downstream	UniRef100_R7C560	71.371	CTP synthase	1189	undefined	undefined	ko:K01937	CTP_synth_N,GATase	BAA_g10047_2	downstream	UniRef100_A0A174JLD0	99.5	CAAX amino terminal protease self-immunity	1259	undefined	undefined	ko:K07052	Abi
67	BAA_14	BAA_14_26	BAA	k77_110846	25603	sub_G	17	no_sweep	0	BAA_g15822_25	in	UniRef100_A0A173RWJ5	100	Translation initiation factor IF-2	1419	non_syn	G->S	ko:K02519	GTP_EFTU,IF-2,IF2_N	-	-	-	-	-	-	-	-
67	BAA_14	BAA_14_27	BAA	k77_173526	1713	sub_A	17	no_sweep	0	BAA_g18400_2	in	UniRef100_R6GCN1	99.6	Response regulator receiver domain protein	693	non_syn	Y->D	-	Response_reg,Trans_reg_C	-	-	-	-	-	-	-	-
67	BAA_14	BAA_14_28	BAA	k77_176873	6976	sub_C	17	no_sweep	0	BAA_g23688_4	downstream	UniRef100_A0A1C5WRN3	96.5	Cadmium, zinc and cobalt-transporting ATPase	3729	undefined	undefined	ko:K01534	E1-E2_ATPase,HMA,Hydrolase	BAA_g23688_5	downstream	UniRef100_A0A173RLE8	99.8	Acetate kinase	1747	undefined	undefined	ko:K00925	Acetate_kinase
67	BAA_14	BAA_14_29	BAA	k77_48777	20598	sub_C	17	no_sweep	0	BAA_g22397_34	in	UniRef100_A0A173RFE0	99.7	DNA-directed RNA polymerase subunit alpha	741	non_syn	P->S	ko:K03040	RNA_pol_A_CTD,RNA_pol_A_bac,RNA_pol_L	-	-	-	-	-	-	-	-
67	BAA_14	BAA_14_30	BAA	k77_100123	10490	sub_C	17	sweep	0	BAA_g30311_11	in	UniRef100_A0A374NTW3	96.893	Glycerol-3-phosphate responsive antiterminator	348	non_syn	D->N	ko:K02443	G3P_antiterm	-	-	-	-	-	-	-	-
67	BAA_14	BAA_14_31	BAA	k77_165091	261	sub_C	17	sweep	0	BAA_g25827_1	downstream	UniRef100_A0A173X388	100	4Fe-4S dicluster domain-containing protein	1406	undefined	undefined	-	Fer4,Fer4_4,Flavodoxin_5	-	-	-	-	-	-	-	-
67	BAA_14	BAA_14_32	BAA	k77_189934	32923	sub_G	17	sweep	0	BAA_g47357_31	in	UniRef100_A0A415UG36	99.554	ATP-dependent DNA helicase RecG	1433	non_syn	Vi->V	ko:K03655	DEAD,Helicase_C,RecG_wedge	-	-	-	-	-	-	-	-
67	BAA_14	BAA_14_33	BAA	k77_5453	19068	sub_G	17	sweep	0	BAA_g39107_21	in	UniRef100_A0A173SP46	100	Phosphoribosylglycinamide formyltransferase	62	syn	A->A	ko:K11175	Formyl_trans_N	-	-	-	-	-	-	-	-
67	BAA_14	BAA_14_34	BAA	k77_71766	5052	sub_T	17	sweep	0	BAA_g5479_4	in	UniRef100_A0A173RDN1	100	Stage IV sporulation protein A	1333	non_syn	Ii->T	ko:K06398	Spore_IV_A	-	-	-	-	-	-	-	-
67	BAA_14	BAA_14_35	BAA	k77_88979	17841	sub_T	17	sweep	0	BAA_g47453_15	in	UniRef100_A0A415U912	99.2	ABC transporter ATP-binding protein	727	non_syn	V->A	ko:K01990	ABC_tran	-	-	-	-	-	-	-	-
67	BAA_14	BAA_14_36	BAA	k77_163370	8537	sub_T	17	no_sweep	0	BAA_g46497_10	in	UniRef100_R6GC78	99.8	Fibronectin type III domain protein	2953	non_syn	Q->Li	-	-	-	-	-	-	-	-	-	-
67	BAA_14	BAA_14_37	BAA	k77_176680	2164	sub_C	17	no_sweep	0	BAA_g19437_2	in	UniRef100_A0A174J3X8	100	DegV domain-containing protein SAV1425	164	syn	Q->Q	-	DegV	-	-	-	-	-	-	-	-
67	BAA_14	BAA_14_38	BAA	k77_73573	25101	del_1	17	no_sweep	0	BAA_g35299_24	in	UniRef100_A0A173S1U0	99.4	T5orf172 domain	443	unknown	unknown	-	DUF4041,T5orf172	-	-	-	-	-	-	-	-
67	BAA_14	BAA_14_39	BAA	k77_169327	17256	dangleRight_k77_173639|-	1	no_sweep	0	BAA_g46417_15	in	UniRef100_A0A1C5RAS8	100	Sensory/regulatory protein RpfC	711	unknown	unknown	-	HATPase_c,HisKA,PAS_3,Response_reg	-	-	-	-	-	-	-	-
67	BAA_14	BAA_14_40	BAA	k77_185644	15125	del_1	2	no_sweep	0	BAA_g22928_13	in	UniRef100_A0A173RQ01	100	Pro-sigmaK processing inhibitor BofA	165	unknown	unknown	-	BofA	-	-	-	-	-	-	-	-
67	BAA_14	BAA_14_41	BAA	k77_39891	28942	sub_A	2	no_sweep	0	BAA_g22785_24	in	UniRef100_UPI0005D29D06	100	hypothetical protein	100	non_syn	A->V	ko:K01447	Amidase_2,Big_2	-	-	-	-	-	-	-	-
67	BAA_14	BAA_14_42	BAA	k77_147470	42207	dangleLeft_k77_147470|+	1	no_sweep	0	BAA_g31515_37	in	UniRef100_A0A174G3U5	98.2	Uncharacterized protein	452	unknown	unknown			-	-	-	-	-	-	-	-
68	BAA_15	BAA_15_1	BAA	k77_120411	18232	sub_A	7	no_sweep	0	BAA_g23940_16	in	UniRef100_A0A5B3GJ82	98.3	Helix-turn-helix transcriptional regulator	80	syn	R->R	-	HTH_19,HTH_3,HTH_31	-	-	-	-	-	-	-	-
68	BAA_15	BAA_15_2	BAA	k77_95514	4131	sub_A	7	no_sweep	0	BAA_g5361_5	in	UniRef100_D4MY65	100	KDP operon transcriptional regulatory protein KdpE	647	non_syn	Mi->Ii	ko:K07667	Response_reg,Trans_reg_C	-	-	-	-	-	-	-	-
68	BAA_15	BAA_15_3	BAA	k77_95514	4134	sub_T	7	no_sweep	0	BAA_g5361_5	in	UniRef100_D4MY65	100	KDP operon transcriptional regulatory protein KdpE	644	syn	G->G	ko:K07667	Response_reg,Trans_reg_C	-	-	-	-	-	-	-	-
68	BAA_15	BAA_15_4	BAA	k77_95514	22737	sub_A	7	no_sweep	0	BAA_g5361_22	in	UniRef100_A0A174D0C7	100	Thiamine ECF transporter S component HmpT	149	syn	A->A	-	ECF-ribofla_trS	-	-	-	-	-	-	-	-
68	BAA_15	BAA_15_5	BAA	k77_95514	22740	sub_T	7	no_sweep	0	BAA_g5361_22	in	UniRef100_A0A174D0C7	100	Thiamine ECF transporter S component HmpT	152	syn	Ii->Ii	-	ECF-ribofla_trS	-	-	-	-	-	-	-	-
68	BAA_15	BAA_15_6	BAA	k77_145806	7143	sub_G	7	no_sweep	0	BAA_g4183_8	in	UniRef100_A0A417V8I7	98.4	tRNA threonylcarbamoyladenosine dehydratase	680	syn	G->G	ko:K22132	ThiF	-	-	-	-	-	-	-	-
68	BAA_15	BAA_15_7	BAA	k77_2849	22965	sub_A	7	no_sweep	0	BAA_g36903_21	in	UniRef100_A0A173WGE9	100	Rod shape-determining protein MreB	404	syn	V->V	ko:K03569	MreB_Mbl	-	-	-	-	-	-	-	-
69	BAA_16	BAA_16_1	BAA	k77_22443	3988	sub_C	26	sweep	0	BAA_g28163_5	in	UniRef100_R5WWU9	98.437	Uncharacterized protein	1187	syn	G->G	ko:K17318	SBP_bac_1,SBP_bac_8,TAT_signal	-	-	-	-	-	-	-	-
69	BAA_16	BAA_16_2	BAA	k77_12977	15063	sub_T	26	no_sweep	0	BAA_g16689_16	in	UniRef100_R5WPA4	100	Uncharacterized protein	320	syn	N->N	ko:K02768,ko:K02769,ko:K02770	PTS_EIIA_2,PTS_EIIC,PTS_IIB	-	-	-	-	-	-	-	-
69	BAA_16	BAA_16_3	BAA	k77_31674	3279	sub_T	26	no_sweep	0	BAA_g30346_4	in	UniRef100_R5WQZ4	99.8	Uncharacterized protein	551	syn	V->V	ko:K03458	Xan_ur_permease	-	-	-	-	-	-	-	-
69	BAA_16	BAA_16_4	BAA	k77_101704	8128	sub_G	26	no_sweep	0	BAA_g10400_8	in	UniRef100_UPI0011CAE322	99.9	PTS transporter subunit EIIC	1016	syn	E->E	ko:K20116,ko:K20117,ko:K20118	PTS_EIIA_1,PTS_EIIB,PTS_EIIC	-	-	-	-	-	-	-	-
69	BAA_16	BAA_16_5	BAA	k77_101704	18717	sub_C	26	no_sweep	0	BAA_g10400_17	in	UniRef100_UPI00136369AD	74.898	IS30 family transposase	537	non_syn	V->Ii	-	HTH_38,rve	-	-	-	-	-	-	-	-
69	BAA_16	BAA_16_6	BAA	k77_109908	11591	sub_T	26	no_sweep	0	BAA_g46391_13	in	UniRef100_UPI001106F6AB	99.2	endolytic transglycosylase MltG	124	non_syn	S->F	ko:K07082	YceG	-	-	-	-	-	-	-	-
69	BAA_16	BAA_16_7	BAA	k77_133777	881	sub_T	26	no_sweep	0	BAA_g45280_1	in	UniRef100_UPI0011CA1D91	64.657	undecaprenyl-phosphate glucose phosphotransferase	36	non_syn	Ii->V	ko:K00996	Bac_transf,CoA_binding_3	-	-	-	-	-	-	-	-
69	BAA_16	BAA_16_8	BAA	k77_133777	891	sub_A	26	no_sweep	0	BAA_g45280_1	in	UniRef100_UPI0011CA1D91	64.657	undecaprenyl-phosphate glucose phosphotransferase	26	syn	A->A	ko:K00996	Bac_transf,CoA_binding_3	-	-	-	-	-	-	-	-
69	BAA_16	BAA_16_9	BAA	k77_144777	3709	sub_T	26	no_sweep	0	BAA_g31896_5	in	UniRef100_UPI0011CB9ECC	100	ribonuclease HII	719	syn	P->P	ko:K03470	RNase_HII	-	-	-	-	-	-	-	-
69	BAA_16	BAA_16_10	BAA	k77_144823	1467	sub_C	26	no_sweep	0	BAA_g32461_2	in	UniRef100_UPI0011C952FD	98.548	alpha,alpha-phosphotrehalase	1002	non_syn	S->A	ko:K01182	Alpha-amylase,Malt_amylase_C	-	-	-	-	-	-	-	-
69	BAA_16	BAA_16_11	BAA	k77_155152	16384	sub_G	26	no_sweep	0	BAA_g8581_18	in	UniRef100_UPI0011CC7F8E	100	nitroreductase	83	non_syn	Li->L	-	Nitroreductase	-	-	-	-	-	-	-	-
69	BAA_16	BAA_16_12	BAA	k77_167516	11136	sub_T	26	no_sweep	0	BAA_g21501_9	in	UniRef100_UPI0011CB650A	99.1	chloride channel protein	210	non_syn	Li->Mi	ko:K03281	Voltage_CLC	-	-	-	-	-	-	-	-
69	BAA_16	BAA_16_13	BAA	k77_170744	1801	sub_G	26	no_sweep	0	BAA_g26638_2	in	UniRef100_UPI0011C83177	100	peptide chain release factor 1	192	syn	Li->Li	ko:K02835	PCRF,RF-1	-	-	-	-	-	-	-	-
69	BAA_16	BAA_16_14	BAA	k77_17554	5699	sub_G	26	no_sweep	0	BAA_g39410_8	in	UniRef100_UPI00110685A1	99.6	cobalt ECF transporter T component CbiQ	71	syn	F->F	ko:K02008	CbiQ	-	-	-	-	-	-	-	-
69	BAA_16	BAA_16_15	BAA	k77_21804	12900	sub_A	26	no_sweep	0	BAA_g17962_13	in	UniRef100_UPI0011C9017D	98	glycosyltransferase	2261	syn	S->S	-	Glycos_transf_2	-	-	-	-	-	-	-	-
69	BAA_16	BAA_16_16	BAA	k77_27743	1284	sub_G	26	no_sweep	0	-	-	-	-	-	-	-	-			-	-	-	-	-	-	-	-
69	BAA_16	BAA_16_17	BAA	k77_3605	4735	sub_C	26	no_sweep	0	BAA_g10514_4	in	UniRef100_UPI0011CC77E9	99.5	hypothetical protein	1710	non_syn	R->G	-	Peptidase_C39_2	-	-	-	-	-	-	-	-
69	BAA_16	BAA_16_18	BAA	k77_514	5639	sub_C	26	no_sweep	0	BAA_g4201_4	in	UniRef100_UPI0011C7F83C	100	bifunctional acetaldehyde-CoA/alcohol dehydrogenase	1508	syn	T->T	ko:K04072	Aldedh,Fe-ADH	-	-	-	-	-	-	-	-
69	BAA_16	BAA_16_19	BAA	k77_61770	2928	sub_A	26	no_sweep	0	BAA_g34638_4	in	UniRef100_UPI0011CC0E3C	75.756	alpha-amylase	866	syn	Ii->Ii	ko:K01208,ko:K11991	Alpha-amylase,Alpha-amylase_C,DUF1653,Malt_amylase_C	-	-	-	-	-	-	-	-
69	BAA_16	BAA_16_20	BAA	k77_64047	13318	sub_G	26	no_sweep	0	BAA_g24680_13	in	UniRef100_UPI0011CA1BF9	99.5	4Fe-4S dicluster domain-containing protein	373	non_syn	G->A	ko:K00196,ko:K05796	Fer4_11	-	-	-	-	-	-	-	-
69	BAA_16	BAA_16_21	BAA	k77_73016	7163	sub_G	26	no_sweep	0	BAA_g26368_7	in	UniRef100_UPI0011C90458	99.8	UDP-N-acetylmuramate--L-alanine ligase	833	syn	L->L	ko:K01924	Mur_ligase,Mur_ligase_C,Mur_ligase_M	-	-	-	-	-	-	-	-
69	BAA_16	BAA_16_22	BAA	k77_83635	2749	sub_T	26	no_sweep	0	BAA_g8200_2	in	UniRef100_UPI0011C866A8	99.6	glycogen/starch/alpha-glucan family phosphorylase	1376	syn	N->N	ko:K00688	Phosphorylase	-	-	-	-	-	-	-	-
69	BAA_16	BAA_16_23	BAA	k77_83635	2877	sub_T	26	no_sweep	0	BAA_g8200_2	in	UniRef100_UPI0011C866A8	99.6	glycogen/starch/alpha-glucan family phosphorylase	1504	non_syn	L->P	ko:K00688	Phosphorylase	-	-	-	-	-	-	-	-
69	BAA_16	BAA_16_24	BAA	k77_92276	13757	sub_G	26	no_sweep	0	BAA_g2729_9	in	UniRef100_R5WRC3	99.4	L-glutamine synthetase	458	syn	E->E	ko:K01915	GSIII_N,Gln-synt_C	-	-	-	-	-	-	-	-
69	BAA_16	BAA_16_25	BAA	k77_9676	13059	sub_T	26	no_sweep	0	BAA_g10995_10	in	UniRef100_R5XJQ2	99.8	Phosphoribosylformylglycinamidine synthase	237	non_syn	D->N	ko:K01952	AIRS,AIRS_C,GATase_5	-	-	-	-	-	-	-	-
69	BAA_16	BAA_16_26	BAA	k77_99029	2278	sub_A	26	no_sweep	0	BAA_g14838_3	in	UniRef100_UPI001106CDF6	98.4	ABC transporter permease	851	non_syn	Mi->Ii	ko:K01992	ABC2_membrane_3	-	-	-	-	-	-	-	-
69	BAA_16	BAA_16_27	BAA	k77_104098	29424	sub_C	14	sweep	0	-	-	-	-	-	-	-	-			-	-	-	-	-	-	-	-
69	BAA_16	BAA_16_28	BAA	k77_104098	29438	sub_C	14	sweep	0	-	-	-	-	-	-	-	-			-	-	-	-	-	-	-	-
69	BAA_16	BAA_16_29	BAA	k77_104098	29442	sub_C	14	sweep	0	-	-	-	-	-	-	-	-			-	-	-	-	-	-	-	-
69	BAA_16	BAA_16_30	BAA	k77_104098	29444	sub_G	14	sweep	0	-	-	-	-	-	-	-	-			-	-	-	-	-	-	-	-
69	BAA_16	BAA_16_31	BAA	k77_101704	18701	sub_A	14	no_sweep	0	BAA_g10400_17	in	UniRef100_UPI00136369AD	74.898	IS30 family transposase	553	non_syn	Vi->E	-	HTH_38,rve	-	-	-	-	-	-	-	-
69	BAA_16	BAA_16_32	BAA	k77_101704	18703	sub_G	14	no_sweep	0	BAA_g10400_17	in	UniRef100_UPI00136369AD	74.898	IS30 family transposase	551	syn	D->D	-	HTH_38,rve	-	-	-	-	-	-	-	-
69	BAA_16	BAA_16_33	BAA	k77_104098	29223	sub_T	14	no_sweep	0	-	-	-	-	-	-	-	-			-	-	-	-	-	-	-	-
69	BAA_16	BAA_16_34	BAA	k77_104098	29325	sub_A	14	no_sweep	0	-	-	-	-	-	-	-	-			-	-	-	-	-	-	-	-
69	BAA_16	BAA_16_35	BAA	k77_104098	29328	sub_T	14	no_sweep	0	-	-	-	-	-	-	-	-			-	-	-	-	-	-	-	-
69	BAA_16	BAA_16_36	BAA	k77_104098	29331	sub_A	14	no_sweep	0	-	-	-	-	-	-	-	-			-	-	-	-	-	-	-	-
69	BAA_16	BAA_16_37	BAA	k77_104098	29393	sub_C	14	no_sweep	0	-	-	-	-	-	-	-	-			-	-	-	-	-	-	-	-
69	BAA_16	BAA_16_38	BAA	k77_104098	29400	sub_A	14	no_sweep	0	-	-	-	-	-	-	-	-			-	-	-	-	-	-	-	-
69	BAA_16	BAA_16_39	BAA	k77_104098	29406	sub_A	14	no_sweep	0	-	-	-	-	-	-	-	-			-	-	-	-	-	-	-	-
69	BAA_16	BAA_16_40	BAA	k77_104098	29411	sub_G	14	no_sweep	0	-	-	-	-	-	-	-	-			-	-	-	-	-	-	-	-
70	BAA_17	BAA_17_1	BAA	k77_2514	56733	sub_A	1	no_sweep	0	BAA_g32126_63	in	UniRef100_UPI0011059289	74.337	hypothetical protein	1022	syn	V->V	-	DHH,DHHA1	-	-	-	-	-	-	-	-
71	BAA_18	BAA_18_1	BAA	k77_17191	29781	sub_C	2	sweep	83	BAA_g35717_22	in	UniRef100_UPI0012AB9373	38.021	DNA gyrase subunit A	346	non_syn	A->V	ko:K02469	DNA_gyraseA_C,DNA_topoisoIV	-	-	-	-	-	-	-	-
71	BAA_18	BAA_18_2	BAA	k77_1602	18821	del_1	2	no_sweep	0	BAA_g18773_19	downstream	UniRef100_A0A0H3EEJ1	97.335	FAD:protein FMN transferase	1000	undefined	undefined	ko:K03734	ApbE	BAA_g18773_20	downstream	UniRef100_UPI0009B74CDD	87.614	winged helix-turn-helix transcriptional regulator	460	undefined	undefined	-	Fic,Fic_N
71	BAA_18	BAA_18_3	BAA	k77_98673	13568	sub_C	47	no_sweep	0	BAA_g8253_16	in	UniRef100_A0A0E2Z9N9	100	ABC transporter ATP-binding protein	213	non_syn	T->A	-	ABC_tran	-	-	-	-	-	-	-	-
71	BAA_18	BAA_18_4	BAA	k77_98673	13669	sub_A	47	no_sweep	0	BAA_g8253_16	in	UniRef100_A0A0E2Z9N9	100	ABC transporter ATP-binding protein	112	non_syn	T->Ii	-	ABC_tran	-	-	-	-	-	-	-	-
71	BAA_18	BAA_18_5	BAA	k77_98673	13723	sub_C	47	no_sweep	0	BAA_g8253_16	in	UniRef100_A0A0E2Z9N9	100	ABC transporter ATP-binding protein	58	non_syn	L->R	-	ABC_tran	-	-	-	-	-	-	-	-
71	BAA_18	BAA_18_6	BAA	k77_98673	13860	sub_A	47	no_sweep	0	BAA_g8253_17	in	UniRef100_E3EQG6	100	ATP-binding protein of ABC transporter system	1157	syn	A->A	ko:K02004	FtsX	-	-	-	-	-	-	-	-
71	BAA_18	BAA_18_7	BAA	k77_98673	13901	sub_T	47	no_sweep	0	BAA_g8253_17	in	UniRef100_E3EQG6	100	ATP-binding protein of ABC transporter system	1116	non_syn	Li->Mi	ko:K02004	FtsX	-	-	-	-	-	-	-	-
71	BAA_18	BAA_18_8	BAA	k77_98673	14032	sub_G	47	no_sweep	0	BAA_g8253_17	in	UniRef100_E3EQG6	100	ATP-binding protein of ABC transporter system	985	non_syn	Vi->A	ko:K02004	FtsX	-	-	-	-	-	-	-	-
71	BAA_18	BAA_18_9	BAA	k77_98673	14083	sub_T	47	no_sweep	0	BAA_g8253_17	in	UniRef100_E3EQG6	100	ATP-binding protein of ABC transporter system	934	non_syn	G->D	ko:K02004	FtsX	-	-	-	-	-	-	-	-
71	BAA_18	BAA_18_10	BAA	k77_98673	14207	sub_T	47	no_sweep	0	BAA_g8253_17	in	UniRef100_E3EQG6	100	ATP-binding protein of ABC transporter system	810	non_syn	D->N	ko:K02004	FtsX	-	-	-	-	-	-	-	-
71	BAA_18	BAA_18_11	BAA	k77_98673	14278	sub_T	47	no_sweep	0	BAA_g8253_17	in	UniRef100_E3EQG6	100	ATP-binding protein of ABC transporter system	739	non_syn	G->D	ko:K02004	FtsX	-	-	-	-	-	-	-	-
71	BAA_18	BAA_18_12	BAA	k77_98673	14296	sub_C	47	no_sweep	0	BAA_g8253_17	in	UniRef100_E3EQG6	100	ATP-binding protein of ABC transporter system	721	non_syn	Q->R	ko:K02004	FtsX	-	-	-	-	-	-	-	-
71	BAA_18	BAA_18_13	BAA	k77_98673	14298	sub_T	47	no_sweep	0	BAA_g8253_17	in	UniRef100_E3EQG6	100	ATP-binding protein of ABC transporter system	719	non_syn	S->R	ko:K02004	FtsX	-	-	-	-	-	-	-	-
71	BAA_18	BAA_18_14	BAA	k77_98673	14300	sub_C	47	no_sweep	0	BAA_g8253_17	in	UniRef100_E3EQG6	100	ATP-binding protein of ABC transporter system	717	non_syn	S->G	ko:K02004	FtsX	-	-	-	-	-	-	-	-
[truncated: 57,646 more rows]
